# Supplementary material for: The Cryptosporidium Parvum Transcriptome during In Vitro Development
Source: PubMed Central journal article supplement (PMC3305300; doi:10.1371/journal.pone.0031715), 2012-03-15
Supplement: pone.0031715.s004.pdf [file pone.0031715.s004.pdf]

| Time point | Time Course 1 | Time Course 2 | Time Course 3 | Time Course 4 |
|------------|---------------|---------------|---------------|---------------|
|            | cgd2_1400     |               |               |               |
| 2h         | 0.00E+00      | 5.01E-08      | 0.00E+00      | 1.02E-07      |
| 6h         | 2.01E-09      | 1.98E-08      | 5.85E-08      | 1.42E-06      |
| 12h        | 7.70E-10      | 2.02E-08      | 2.16E-08      | 1.77E-08      |
| 24h        | 2.57E-09      | 1.22E-08      | 2.19E-08      | 1.43E-07      |
| 36h        | 1.23E-08      | 1.10E-08      | 9.35E-09      | 6.18E-08      |
| 48h        | 1.12E-06      | 1.17E-07      | 9.78E-08      | 3.57E-06      |
| 72h        | 1.53E-07      | 4.09E-06      | 2.81E-08      | 1.11E-06      |
|            | cgd3_3330     |               |               |               |
| 2h         | 9.34E-07      | 6.72E-06      | 6.10E-08      | 9.62E-07      |
| 6h         | 3.35E-08      | 4.10E-07      | 5.05E-08      | 1.13E-08      |
| 12h        | 2.05E-07      | 1.17E-06      | 1.15E-08      | 6.87E-08      |
| 24h        | 1.11E-07      | 7.36E-07      | 8.05E-08      | 2.19E-08      |
| 36h        | 1.33E-06      | 9.56E-08      | 1.85E-07      | 1.27E-07      |
| 48h        | 6.29E-07      | 3.73E-07      | 2.51E-07      | 1.16E-06      |
| 72h        | 2.38E-07      | 6.43E-08      | 3.53E-07      | 1.33E-07      |
|            | cgd3_2710     |               |               |               |
| 2h         | 3.91E-09      | 0.00E+00      | 0.00E+00      | 2.27E-09      |
| 6h         | 5.45E-09      | 4.85E-08      | 2.04E-09      | 1.19E-08      |
| 12h        | 4.74E-09      | 2.29E-08      | 5.72E-09      | 8.78E-09      |
| 24h        | 1.87E-09      | 9.08E-09      | 4.15E-09      | 4.44E-09      |
| 36h        | 9.49E-08      | 8.11E-09      | 8.85E-09      | 1.12E-08      |
| 48h        | 2.04E-07      | 6.68E-08      | 3.16E-08      | 7.38E-07      |
| 72h        | 8.55E-08      | 8.34E-08      | 1.01E-07      | 1.99E-07      |
|            | cgd3_2730     |               |               |               |
| 2h         | 2.44E-08      | 1.08E-07      | 0.00E+00      | 3.60E-09      |
| 6h         | 2.29E-08      | 3.11E-07      | 7.12E-10      | 1.36E-08      |
| 12h        | 1.81E-07      | 2.56E-07      | 2.77E-09      | 3.77E-08      |
| 24h        | 4.27E-08      | 1.17E-07      | 4.87E-08      | 1.50E-08      |
| 36h        | 1.07E-06      | 7.95E-08      | 1.10E-07      | 4.49E-08      |
| 48h        | 8.53E-07      | 2.21E-07      | 1.54E-07      | 1.38E-06      |
| 72h        | 1.16E-07      | 5.21E-08      | 4.82E-07      | 5.87E-08      |
|            | cgd3_3340     |               |               |               |
| 2h         | 0.00E+00      | 0.00E+00      | 0.00E+00      | 1.07E-05      |
| 6h         | 3.68E-07      | 7.88E-07      | 8.29E-08      | 2.53E-07      |
| 12h        | 2.45E-06      | 1.57E-05      | 7.76E-07      | 7.59E-07      |
| 24h        | 6.33E-07      | 2.32E-06      | 1.50E-07      | 5.33E-07      |
| 36h        | 2.19E-05      | 1.49E-07      | 8.39E-08      | 2.61E-07      |
| 48h        | 2.51E-06      | 1.36E-06      | 0.00E+00      | 4.78E-06      |
| 72h        | 6.04E-07      | 3.51E-07      | 1.01E-06      | 1.25E-06      |
|            | cgd3_3140     |               |               |               |
| 2h         | 9.20E-08      | 0.00E+00      | 0.00E+00      | 0.00E+00      |
| 6h         | 0.00E+00      | 0.00E+00      | 0.00E+00      | 0.00E+00      |
| 12h        | 1.81E-06      | 5.70E-06      | 0.00E+00      | 5.87E-08      |
| 24h        | 5.36E-08      | 1.18E-06      | 1.34E-08      | 1.01E-09      |
| 36h        | 5.39E-06      | 2.80E-06      | 2.89E-07      | 5.78E-07      |
| 48h        | 4.32E-06      | 9.25E-06      | 3.46E-07      | 8.71E-06      |
| 72h        | 1.40E-06      | 3.20E-06      | 4.09E-06      | 3.78E-06      |
|            | cgd3_3200     |               |               |               |
| 2h         | 4.60E-10      | 1.33E-08      | 0.00E+00      | 8.06E-10      |
| 6h         | 7.77E-10      | 0.00E+00      | 0.00E+00      | 1.32E-10      |

|     |           |          |          |          |
|-----|-----------|----------|----------|----------|
| 12h | 7.33E-07  | 4.95E-07 | 1.31E-07 | 0.00E+00 |
| 24h | 5.25E-08  | 1.32E-07 | 4.66E-08 | 2.25E-08 |
| 36h | 7.98E-07  | 1.97E-07 | 1.55E-07 | 1.56E-07 |
| 48h | 2.22E-07  | 2.47E-07 | 4.45E-08 | 6.96E-07 |
| 72h | 6.32E-08  | 9.10E-08 | 2.18E-07 | 8.61E-08 |
|     | cgd3_3210 |          |          |          |
| 2h  | 6.69E-10  | 0.00E+00 | 0.00E+00 | 1.32E-09 |
| 6h  | 2.18E-08  | 2.92E-07 | 1.04E-08 | 6.66E-08 |
| 12h | 7.83E-08  | 2.34E-07 | 7.11E-09 | 1.19E-08 |
| 24h | 2.96E-08  | 2.17E-07 | 3.97E-08 | 1.29E-08 |
| 36h | 2.06E-06  | 1.91E-07 | 2.09E-07 | 4.17E-07 |
| 48h | 2.45E-07  | 4.67E-07 | 4.21E-08 | 1.35E-06 |
| 72h | 1.74E-07  | 1.28E-07 | 7.46E-07 | 2.69E-07 |
|     | cgd3_3240 |          |          |          |
| 2h  | 1.65E-08  | 8.72E-08 | 3.04E-09 | 2.09E-08 |
| 6h  | 1.18E-09  | 5.44E-10 | 2.04E-10 | 6.46E-09 |
| 12h | 5.59E-09  | 1.73E-08 | 5.05E-09 | 2.14E-09 |
| 24h | 4.16E-09  | 6.79E-09 | 3.69E-09 | 3.96E-09 |
| 36h | 3.42E-08  | 2.25E-09 | 2.28E-08 | 4.37E-09 |
| 48h | 2.04E-08  | 3.16E-08 | 2.02E-08 | 3.77E-08 |
| 72h | 2.82E-08  | 1.51E-08 | 6.79E-08 | 2.22E-08 |
|     | cgd3_3270 |          |          |          |
| 2h  | 2.00E-08  | 6.05E-08 | 6.47E-08 | 5.10E-08 |
| 6h  | 9.58E-09  | 2.64E-09 | 1.55E-08 | 4.43E-09 |
| 12h | 4.54E-08  | 2.91E-08 | 5.69E-08 | 5.47E-08 |
| 24h | 9.56E-09  | 9.41E-09 | 1.87E-08 | 1.41E-08 |
| 36h | 4.64E-09  | 5.18E-09 | 9.14E-09 | 1.40E-08 |
| 48h | 1.53E-08  | 1.13E-08 | 2.91E-08 | 1.49E-08 |
| 72h | 5.57E-09  | 2.96E-09 | 7.64E-09 | 1.07E-08 |
|     | cgd3_3320 |          |          |          |
| 2h  | 0.00E+00  | 5.99E-08 | 0.00E+00 | 1.13E-08 |
| 6h  | 2.02E-07  | 1.33E-07 | 9.86E-08 | 7.02E-08 |
| 12h | 4.51E-08  | 1.66E-07 | 5.98E-08 | 3.95E-08 |
| 24h | 7.13E-08  | 2.82E-07 | 1.64E-07 | 6.61E-08 |
| 36h | 9.78E-08  | 3.75E-08 | 5.79E-08 | 4.87E-08 |
| 48h | 1.43E-07  | 6.06E-08 | 8.62E-08 | 2.53E-07 |
| 72h | 1.98E-08  | 1.11E-08 | 3.68E-08 | 1.24E-08 |
|     | cgd3_3130 |          |          |          |
| 2h  | 0.00E+00  | 7.63E-09 | 3.90E-09 | 2.69E-10 |
| 6h  | 0.00E+00  | 0.00E+00 | 0.00E+00 | 0.00E+00 |
| 12h | 2.23E-10  | 6.95E-10 | 7.57E-10 | 8.51E-10 |
| 24h | 2.21E-10  | 9.58E-10 | 2.94E-10 | 2.08E-10 |
| 36h | 5.68E-09  | 9.40E-10 | 4.68E-10 | 5.66E-11 |
| 48h | 2.32E-08  | 1.26E-08 | 6.50E-09 | 2.83E-08 |
| 72h | 1.93E-08  | 5.25E-08 | 1.07E-07 | 1.16E-08 |
|     | cgd1_3020 |          |          |          |
| 2h  | 7.07E-10  | 1.66E-09 | 0.00E+00 | 0.00E+00 |
| 6h  | 2.09E-08  | 4.64E-09 | 1.22E-07 | 4.91E-10 |
| 12h | 6.48E-06  | 4.53E-06 | 5.33E-07 | 7.91E-08 |
| 24h | 2.72E-07  | 1.84E-07 | 9.98E-08 | 1.87E-08 |
| 36h | 9.76E-07  | 3.98E-07 | 1.12E-07 | 6.40E-08 |
| 48h | 2.02E-06  | 3.16E-06 | 8.54E-07 | 4.50E-07 |
| 72h | 3.23E-07  | 1.95E-07 | 8.65E-08 | 2.12E-07 |

|     |           |          |          |          |
|-----|-----------|----------|----------|----------|
|     | cgd1_3090 |          |          |          |
| 2h  | 4.33E-09  | 2.00E-08 | 3.44E-07 | 5.18E-08 |
| 6h  | 2.23E-07  | 1.84E-07 | 1.44E-06 | 1.18E-08 |
| 12h | 1.30E-07  | 6.62E-08 | 6.84E-07 | 2.16E-08 |
| 24h | 1.00E-07  | 4.62E-08 | 6.19E-07 | 2.09E-08 |
| 36h | 1.11E-07  | 7.87E-08 | 7.02E-07 | 5.85E-08 |
| 48h | 9.40E-08  | 1.28E-07 | 1.27E-06 | 9.59E-07 |
| 72h | 2.74E-08  | 8.34E-08 | 2.51E-07 | 3.41E-07 |
|     | cgd1_3080 |          |          |          |
| 2h  | 1.29E-07  | 0.00E+00 | 2.69E-06 | 2.50E-07 |
| 6h  | 1.95E-06  | 2.51E-06 | 6.47E-06 | 3.06E-07 |
| 12h | 1.49E-06  | 7.40E-07 | 1.66E-06 | 9.50E-07 |
| 24h | 2.01E-06  | 1.86E-07 | 7.52E-06 | 3.48E-07 |
| 36h | 1.25E-06  | 1.14E-06 | 1.85E-05 | 7.46E-07 |
| 48h | 1.27E-06  | 2.18E-06 | 1.23E-05 | 5.85E-06 |
| 72h | 7.71E-07  | 9.36E-07 | 2.07E-06 | 6.27E-06 |
|     | cgd1_3070 |          |          |          |
| 2h  | 2.12E-04  | 3.13E-04 | 1.86E-03 | 1.83E-04 |
| 6h  | 2.77E-05  | 2.88E-05 | 1.38E-05 | 2.57E-06 |
| 12h | 4.20E-04  | 3.57E-04 | 5.76E-04 | 8.50E-05 |
| 24h | 7.90E-05  | 2.32E-05 | 2.18E-04 | 2.48E-05 |
| 36h | 2.89E-05  | 1.02E-05 | 4.40E-05 | 1.03E-05 |
| 48h | 4.97E-04  | 8.57E-05 | 5.97E-04 | 6.84E-04 |
| 72h | 4.21E-05  | 4.60E-05 | 1.21E-04 | 2.75E-04 |
|     | cgd1_3060 |          |          |          |
| 2h  | 1.53E-07  | 3.79E-07 | 1.57E-06 | 1.04E-07 |
| 6h  | 8.43E-08  | 5.39E-08 | 3.48E-07 | 3.51E-08 |
| 12h | 9.92E-08  | 5.51E-08 | 4.12E-07 | 8.14E-08 |
| 24h | 6.81E-08  | 4.54E-08 | 2.09E-07 | 2.82E-08 |
| 36h | 5.58E-08  | 2.30E-07 | 1.02E-07 | 4.71E-08 |
| 48h | 5.45E-08  | 5.32E-08 | 3.06E-07 | 4.30E-07 |
| 72h | 2.08E-08  | 1.04E-08 | 9.13E-08 | 1.67E-07 |
|     | cgd1_3050 |          |          |          |
| 2h  | 5.30E-07  | 3.90E-06 | 7.77E-06 | 7.99E-09 |
| 6h  | 4.47E-07  | 7.35E-07 | 2.03E-06 | 8.34E-07 |
| 12h | 1.61E-07  | 6.81E-07 | 1.03E-06 | 1.51E-08 |
| 24h | 5.06E-07  | 1.24E-07 | 1.07E-06 | 1.39E-07 |
| 36h | 5.83E-07  | 8.60E-07 | 1.73E-06 | 8.83E-07 |
| 48h | 8.56E-07  | 1.37E-06 | 5.04E-06 | 6.18E-06 |
| 72h | 5.98E-07  | 1.52E-07 | 9.22E-07 | 5.86E-05 |
|     | cgd1_3040 |          |          |          |
| 2h  | 2.23E-07  | 7.24E-07 | 7.46E-07 | 6.90E-09 |
| 6h  | 6.77E-08  | 1.53E-08 | 1.22E-07 | 1.23E-09 |
| 12h | 1.77E-07  | 4.99E-07 | 4.69E-07 | 1.84E-07 |
| 24h | 1.63E-07  | 1.87E-07 | 2.48E-07 | 1.33E-08 |
| 36h | 3.95E-06  | 1.21E-06 | 4.92E-06 | 5.33E-07 |
| 48h | 1.94E-06  | 2.80E-06 | 5.10E-06 | 9.77E-06 |
| 72h | 4.52E-07  | 3.10E-07 | 1.36E-06 | 9.82E-06 |
|     | cgd1_3030 |          |          |          |
| 2h  | 7.99E-09  | 9.24E-09 | 6.80E-08 | 4.23E-09 |
| 6h  | 1.51E-07  | 2.16E-07 | 9.35E-07 | 1.29E-07 |
| 12h | 1.32E-08  | 1.30E-08 | 3.14E-08 | 0.00E+00 |
| 24h | 1.23E-07  | 5.69E-08 | 3.95E-07 | 5.80E-09 |

|     |           |          |          |          |
|-----|-----------|----------|----------|----------|
| 36h | 1.32E-07  | 7.66E-08 | 4.36E-07 | 4.70E-08 |
| 48h | 8.24E-08  | 1.11E-07 | 5.24E-07 | 3.42E-07 |
| 72h | 9.25E-08  | 1.24E-07 | 8.35E-07 | 1.28E-06 |
|     | cgd2_1370 |          |          |          |
| 2h  | 8.45E-08  | 7.99E-08 | 6.70E-08 | 2.01E-08 |
| 6h  | 1.58E-07  | 2.80E-07 | 1.15E-07 | 9.20E-08 |
| 12h | 2.99E-08  | 9.26E-08 | 2.20E-08 | 1.66E-08 |
| 24h | 1.09E-07  | 2.71E-08 | 1.60E-07 | 1.06E-08 |
| 36h | 4.16E-08  | 3.25E-07 | 5.90E-08 | 2.45E-08 |
| 48h | 5.26E-08  | 5.16E-08 | 1.47E-07 | 2.74E-07 |
| 72h | 1.68E-08  | 1.32E-08 | 2.80E-08 | 1.40E-07 |
|     | cgd2_1350 |          |          |          |
| 2h  | 3.18E-08  | 2.05E-08 | 7.09E-08 | 0.00E+00 |
| 6h  | 2.93E-07  | 4.80E-07 | 1.14E-06 | 2.13E-07 |
| 12h | 9.54E-09  | 2.13E-08 | 8.86E-09 | 1.27E-09 |
| 24h | 1.28E-07  | 7.20E-08 | 1.99E-07 | 2.87E-08 |
| 36h | 8.45E-08  | 4.94E-07 | 4.44E-07 | 7.60E-08 |
| 48h | 9.64E-08  | 1.99E-07 | 4.30E-07 | 3.38E-07 |
| 72h | 2.92E-08  | 3.35E-08 | 6.48E-08 | 4.50E-07 |
|     | cgd2_1310 |          |          |          |
| 2h  | 4.95E-06  | 3.46E-05 | 9.56E-06 | 3.13E-05 |
| 6h  | 6.00E-06  | 1.32E-04 | 3.48E-06 | 1.99E-05 |
| 12h | 2.51E-06  | 3.67E-05 | 9.63E-06 | 5.45E-05 |
| 24h | 2.29E-06  | 6.93E-06 | 6.65E-06 | 4.51E-06 |
| 36h | 1.37E-06  | 3.30E-05 | 6.09E-06 | 5.82E-06 |
| 48h | 1.87E-06  | 1.78E-05 | 2.79E-06 | 6.02E-05 |
| 72h | 4.06E-07  | 3.30E-06 | 1.67E-06 | 1.70E-05 |
|     | cgd2_1450 |          |          |          |
| 2h  | 1.09E-09  | 2.16E-10 | 0.00E+00 | 0.00E+00 |
| 6h  | 2.47E-07  | 5.90E-07 | 2.37E-06 | 1.47E-08 |
| 12h | 4.62E-09  | 1.34E-08 | 2.12E-08 | 1.78E-08 |
| 24h | 9.05E-08  | 5.86E-08 | 2.81E-07 | 1.49E-08 |
| 36h | 1.12E-07  | 3.07E-07 | 3.06E-07 | 4.36E-08 |
| 48h | 6.35E-08  | 1.09E-07 | 4.96E-07 | 6.03E-07 |
| 72h | 4.25E-08  | 3.10E-08 | 7.34E-08 | 7.84E-07 |
|     | cgd2_1470 |          |          |          |
| 2h  | 2.75E-08  | 5.07E-08 | 3.94E-08 | 3.14E-08 |
| 6h  | 5.20E-08  | 7.85E-08 | 1.97E-07 | 1.21E-09 |
| 12h | 2.09E-08  | 7.58E-08 | 3.18E-08 | 2.15E-08 |
| 24h | 2.93E-08  | 2.93E-08 | 5.98E-08 | 1.06E-08 |
| 36h | 6.67E-09  | 1.00E-07 | 2.07E-08 | 9.48E-09 |
| 48h | 1.45E-08  | 5.68E-08 | 7.44E-08 | 2.06E-07 |
| 72h | 1.30E-08  | 7.27E-09 | 3.13E-08 | 1.36E-07 |
|     | cgd2_1480 |          |          |          |
| 2h  | 0.00E+00  | 2.36E-07 | 2.98E-07 | 5.80E-07 |
| 6h  | 1.44E-07  | 5.36E-08 | 2.44E-08 | 1.35E-06 |
| 12h | 0.00E+00  | 1.31E-07 | 1.01E-07 | 4.84E-06 |
| 24h | 5.63E-08  | 2.15E-08 | 4.69E-08 | 7.73E-07 |
| 36h | 9.45E-08  | 2.88E-07 | 2.07E-07 | 0.00E+00 |
| 48h | 4.46E-07  | 1.32E-07 | 1.26E-08 | 1.84E-06 |
| 72h | 9.63E-08  | 3.22E-08 | 1.81E-08 | 5.68E-06 |
|     | cgd2_1490 |          |          |          |
| 2h  | 1.84E-07  | 1.73E-08 | 3.55E-09 | 0.00E+00 |

|     |           |          |          |          |
|-----|-----------|----------|----------|----------|
| 6h  | 4.16E-07  | 1.07E-08 | 4.46E-10 | 3.17E-10 |
| 12h | 1.20E-07  | 5.84E-09 | 1.21E-09 | 5.67E-10 |
| 24h | 2.50E-07  | 7.20E-10 | 1.04E-09 | 8.54E-11 |
| 36h | 6.48E-08  | 3.46E-08 | 8.77E-10 | 7.73E-10 |
| 48h | 4.88E-08  | 3.74E-08 | 3.46E-08 | 1.61E-07 |
| 72h | 1.52E-08  | 6.89E-09 | 1.58E-08 | 6.71E-08 |
|     | cgd2_1510 |          |          |          |
| 2h  | 5.90E-07  | 1.12E-07 | 2.23E-07 | 4.71E-09 |
| 6h  | 5.28E-08  | 1.46E-07 | 1.04E-07 | 4.82E-09 |
| 12h | 2.84E-08  | 1.82E-07 | 4.84E-08 | 3.16E-08 |
| 24h | 1.05E-08  | 8.79E-09 | 4.65E-08 | 9.41E-09 |
| 36h | 1.96E-08  | 2.20E-07 | 2.84E-08 | 5.28E-09 |
| 48h | 1.09E-08  | 7.34E-08 | 3.80E-08 | 1.78E-07 |
| 72h | 2.02E-08  | 1.81E-08 | 2.68E-08 | 4.84E-08 |
|     | cgd2_1520 |          |          |          |
| 2h  | 3.29E-06  | 9.41E-06 | 5.61E-06 | 1.25E-05 |
| 6h  | 5.96E-07  | 3.29E-06 | 3.05E-06 | 2.64E-07 |
| 12h | 1.89E-06  | 2.65E-05 | 5.20E-06 | 6.26E-06 |
| 24h | 5.51E-07  | 1.16E-06 | 3.14E-06 | 3.57E-07 |
| 36h | 6.28E-07  | 8.43E-06 | 9.48E-07 | 2.42E-06 |
| 48h | 2.31E-07  | 1.60E-06 | 2.48E-06 | 2.00E-05 |
| 72h | 2.80E-07  | 3.06E-07 | 3.44E-07 | 1.45E-05 |
|     | cgd2_1530 |          |          |          |
| 2h  | 1.02E-07  | 8.71E-08 | 1.57E-07 | 1.63E-08 |
| 6h  | 4.15E-08  | 8.99E-08 | 1.20E-07 | 8.85E-09 |
| 12h | 2.59E-08  | 1.08E-08 | 5.57E-08 | 1.22E-08 |
| 24h | 7.89E-09  | 1.58E-08 | 3.20E-08 | 5.72E-09 |
| 36h | 1.77E-08  | 5.29E-08 | 3.26E-08 | 5.17E-09 |
| 48h | 9.51E-09  | 4.36E-08 | 6.67E-08 | 1.96E-07 |
| 72h | 2.40E-08  | 3.60E-09 | 6.06E-08 | 3.95E-08 |
|     | cgd2_1600 |          |          |          |
| 2h  | 0.00E+00  | 0.00E+00 | 0.00E+00 | 0.00E+00 |
| 6h  | 0.00E+00  | 0.00E+00 | 4.10E-09 | 4.41E-09 |
| 12h | 3.90E-09  | 1.21E-09 | 1.55E-09 | 1.55E-09 |
| 24h | 1.25E-09  | 2.84E-10 | 5.47E-09 | 1.28E-08 |
| 36h | 7.85E-09  | 4.51E-09 | 2.94E-09 | 1.58E-07 |
| 48h | 1.68E-07  | 1.38E-08 | 3.03E-08 | 4.67E-08 |
| 72h | 4.60E-08  | 7.92E-10 | 3.86E-08 | 2.61E-08 |
|     | cgd2_1610 |          |          |          |
| 2h  | 0.00E+00  | 0.00E+00 | 0.00E+00 | 0.00E+00 |
| 6h  | 2.19E-09  | 1.26E-09 | 7.28E-09 | 8.96E-09 |
| 12h | 4.16E-10  | 4.00E-10 | 6.47E-11 | 2.31E-10 |
| 24h | 1.03E-08  | 4.00E-09 | 2.30E-09 | 3.13E-09 |
| 36h | 7.60E-09  | 2.53E-09 | 1.19E-10 | 7.09E-09 |
| 48h | 4.81E-08  | 1.39E-07 | 3.90E-08 | 2.53E-08 |
| 72h | 1.32E-08  | 2.75E-08 | 4.96E-09 | 1.38E-08 |
|     | cgd2_1060 |          |          |          |
| 2h  | 4.36E-06  | 1.99E-05 | 1.71E-06 | 2.13E-05 |
| 6h  | 1.95E-06  | 7.02E-06 | 2.23E-06 | 5.43E-05 |
| 12h | 1.79E-06  | 1.08E-05 | 1.19E-06 | 4.55E-05 |
| 24h | 1.46E-06  | 3.33E-06 | 3.14E-06 | 2.30E-05 |
| 36h | 1.13E-06  | 6.94E-06 | 9.44E-07 | 7.70E-06 |
| 48h | 1.13E-06  | 8.28E-06 | 3.35E-06 | 2.80E-05 |

|     |           |          |          |          |
|-----|-----------|----------|----------|----------|
| 72h | 4.27E-07  | 1.19E-06 | 7.14E-07 | 3.72E-06 |
|     | cgd2_1100 |          |          |          |
| 2h  | 0.00E+00  | 0.00E+00 | 0.00E+00 | 1.66E-08 |
| 6h  | 1.58E-08  | 6.78E-08 | 3.43E-07 | 5.30E-07 |
| 12h | 6.78E-09  | 5.44E-08 | 3.30E-08 | 1.94E-07 |
| 24h | 9.68E-08  | 2.48E-07 | 7.11E-08 | 1.01E-06 |
| 36h | 5.38E-07  | 8.46E-07 | 3.76E-07 | 1.08E-06 |
| 48h | 1.66E-07  | 1.40E-06 | 6.44E-07 | 1.10E-06 |
| 72h | 1.93E-07  | 1.88E-07 | 5.69E-07 | 2.02E-06 |
|     | cgd2_1150 |          |          |          |
| 2h  | 3.17E-07  | 1.43E-07 | 3.51E-07 | 2.34E-07 |
| 6h  | 6.93E-07  | 8.93E-07 | 1.86E-06 | 1.38E-06 |
| 12h | 2.65E-07  | 1.91E-07 | 5.73E-07 | 3.54E-07 |
| 24h | 3.45E-07  | 2.07E-07 | 9.34E-07 | 9.26E-07 |
| 36h | 1.81E-07  | 3.68E-07 | 6.21E-07 | 3.95E-07 |
| 48h | 1.65E-07  | 3.52E-07 | 9.68E-07 | 6.97E-07 |
| 72h | 8.32E-08  | 1.12E-08 | 1.85E-07 | 2.40E-07 |
|     | cgd2_1160 |          |          |          |
| 2h  | 3.91E-05  | 6.38E-04 | 2.88E-05 | 1.06E-04 |
| 6h  | 6.42E-05  | 5.15E-03 | 1.72E-04 | 1.24E-03 |
| 12h | 5.47E-05  | 4.13E-04 | 3.83E-05 | 9.73E-04 |
| 24h | 3.62E-05  | 4.13E-04 | 3.32E-05 | 6.35E-04 |
| 36h | 5.14E-05  | 6.91E-04 | 4.40E-05 | 4.95E-04 |
| 48h | 5.22E-05  | 2.85E-04 | 2.91E-05 | 2.05E-04 |
| 72h | 5.73E-06  | 1.94E-05 | 9.93E-06 | 1.41E-04 |
|     | cgd2_1170 |          |          |          |
| 2h  | 2.12E-07  | 5.60E-08 | 7.85E-08 | 1.86E-08 |
| 6h  | 1.32E-07  | 6.22E-08 | 2.62E-08 | 1.69E-08 |
| 12h | 1.66E-07  | 1.15E-07 | 2.53E-08 | 1.49E-08 |
| 24h | 7.21E-08  | 3.19E-08 | 3.95E-08 | 1.06E-08 |
| 36h | 3.00E-08  | 4.36E-08 | 1.28E-08 | 1.41E-08 |
| 48h | 6.63E-08  | 7.08E-08 | 8.26E-08 | 2.58E-08 |
| 72h | 2.48E-08  | 2.57E-09 | 5.32E-08 | 4.64E-08 |
|     | cgd2_1190 |          |          |          |
| 2h  | 7.77E-08  | 1.89E-08 | 1.02E-07 | 4.37E-08 |
| 6h  | 4.20E-09  | 1.10E-08 | 1.15E-09 | 8.78E-09 |
| 12h | 9.80E-08  | 5.70E-08 | 5.12E-08 | 3.64E-08 |
| 24h | 3.89E-09  | 4.90E-09 | 2.32E-08 | 1.50E-08 |
| 36h | 1.28E-08  | 1.56E-08 | 4.70E-09 | 8.92E-09 |
| 48h | 4.00E-08  | 2.00E-08 | 4.25E-08 | 3.18E-08 |
| 72h | 3.17E-08  | 2.48E-09 | 3.77E-08 | 6.46E-08 |
|     | cgd2_1200 |          |          |          |
| 2h  | 0.00E+00  | 1.80E-08 | 4.95E-10 | 6.13E-09 |
| 6h  | 2.91E-07  | 6.30E-06 | 7.94E-07 | 3.03E-06 |
| 12h | 1.78E-07  | 8.69E-07 | 2.43E-07 | 8.65E-07 |
| 24h | 2.94E-07  | 1.67E-06 | 2.68E-07 | 1.69E-06 |
| 36h | 9.02E-07  | 1.02E-06 | 3.81E-07 | 5.21E-07 |
| 48h | 5.47E-07  | 3.12E-06 | 2.94E-07 | 1.93E-06 |
| 72h | 7.17E-07  | 1.71E-07 | 4.98E-07 | 8.68E-07 |
|     | cgd2_1220 |          |          |          |
| 2h  | 1.60E-07  | 8.03E-08 | 3.43E-08 | 2.88E-08 |
| 6h  | 2.36E-09  | 4.21E-09 | 8.02E-09 | 3.50E-09 |
| 12h | 3.75E-08  | 9.63E-09 | 2.29E-08 | 9.65E-09 |

|           |          |          |          |          |
|-----------|----------|----------|----------|----------|
| 24h       | 0.00E+00 | 9.12E-10 | 3.94E-09 | 6.49E-09 |
| 36h       | 1.11E-08 | 1.01E-08 | 5.23E-09 | 9.25E-09 |
| 48h       | 3.86E-08 | 3.05E-08 | 3.38E-08 | 2.61E-08 |
| 72h       | 2.37E-08 | 1.58E-08 | 4.12E-08 | 3.91E-08 |
| cgd2_1270 |          |          |          |          |
| 2h        | 0.00E+00 | 0.00E+00 | 0.00E+00 | 1.16E-08 |
| 6h        | 6.26E-09 | 4.90E-09 | 2.56E-09 | 2.29E-08 |
| 12h       | 9.00E-10 | 2.24E-12 | 0.00E+00 | 0.00E+00 |
| 24h       | 1.28E-09 | 1.51E-10 | 1.51E-09 | 1.62E-08 |
| 36h       | 4.50E-09 | 3.87E-09 | 5.16E-09 | 2.33E-08 |
| 48h       | 3.16E-08 | 4.62E-08 | 5.53E-08 | 8.01E-08 |
| 72h       | 2.21E-08 | 1.32E-09 | 9.22E-08 | 1.54E-07 |
| cgd2_1290 |          |          |          |          |
| 2h        | 0.00E+00 | 0.00E+00 | 2.74E-08 | 0.00E+00 |
| 6h        | 0.00E+00 | 0.00E+00 | 0.00E+00 | 1.19E-08 |
| 12h       | 1.09E-07 | 1.40E-06 | 5.09E-08 | 3.08E-07 |
| 24h       | 3.75E-07 | 1.03E-07 | 1.11E-07 | 8.13E-07 |
| 36h       | 6.44E-07 | 2.94E-06 | 6.49E-07 | 2.58E-06 |
| 48h       | 7.67E-07 | 3.56E-06 | 5.92E-07 | 1.77E-06 |
| 72h       | 9.43E-08 | 1.97E-07 | 4.33E-07 | 1.34E-06 |
| cgd2_1300 |          |          |          |          |
| 2h        | 0.00E+00 | 0.00E+00 | 0.00E+00 | 0.00E+00 |
| 6h        | 0.00E+00 | 0.00E+00 | 0.00E+00 | 0.00E+00 |
| 12h       | 2.25E-09 | 1.44E-07 | 1.71E-08 | 3.50E-08 |
| 24h       | 5.67E-10 | 2.37E-09 | 9.00E-10 | 1.56E-08 |
| 36h       | 9.65E-09 | 2.53E-08 | 1.99E-09 | 1.30E-07 |
| 48h       | 1.08E-06 | 1.04E-06 | 9.31E-08 | 2.82E-06 |
| 72h       | 5.45E-08 | 1.49E-07 | 1.22E-08 | 1.50E-03 |
| cgd2_1110 |          |          |          |          |
| 2h        | 2.03E-10 | 0.00E+00 | 0.00E+00 | 0.00E+00 |
| 6h        | 3.84E-10 | 4.12E-09 | 7.16E-09 | 1.62E-08 |
| 12h       | 1.81E-10 | 7.15E-11 | 4.30E-10 | 5.95E-09 |
| 24h       | 4.58E-09 | 9.00E-10 | 3.36E-09 | 1.60E-08 |
| 36h       | 5.33E-09 | 4.40E-09 | 5.03E-09 | 1.47E-08 |
| 48h       | 7.39E-09 | 3.43E-09 | 2.40E-08 | 8.66E-09 |
| 72h       | 3.89E-09 | 2.34E-09 | 6.81E-09 | 1.91E-08 |
| cgd2_1620 |          |          |          |          |
| 2h        | 5.53E-08 | 1.81E-07 | 1.00E-08 | 9.39E-08 |
| 6h        | 3.49E-07 | 1.47E-07 | 1.27E-08 | 9.78E-08 |
| 12h       | 7.00E-08 | 8.99E-08 | 4.26E-09 | 7.88E-08 |
| 24h       | 3.78E-07 | 1.81E-07 | 1.60E-08 | 6.02E-08 |
| 36h       | 3.00E-07 | 2.44E-07 | 1.06E-08 | 4.51E-08 |
| 48h       | 3.93E-07 | 1.47E-06 | 4.43E-08 | 1.85E-07 |
| 72h       | 2.08E-07 | 3.61E-07 | 1.92E-08 | 5.26E-08 |
| cgd2_1650 |          |          |          |          |
| 2h        | 9.77E-10 | 4.69E-09 | 8.40E-10 | 1.05E-08 |
| 6h        | 9.60E-09 | 4.96E-08 | 7.53E-08 | 1.88E-07 |
| 12h       | 1.65E-09 | 1.24E-09 | 1.06E-09 | 6.16E-09 |
| 24h       | 1.54E-08 | 3.76E-09 | 4.17E-08 | 9.16E-08 |
| 36h       | 1.43E-08 | 1.45E-08 | 3.81E-08 | 3.11E-08 |
| 48h       | 1.17E-07 | 1.63E-08 | 3.70E-08 | 6.76E-08 |
| 72h       | 9.47E-09 | 1.10E-09 | 6.52E-09 | 1.28E-08 |
| cgd2_1660 |          |          |          |          |

|     |           |          |          |          |
|-----|-----------|----------|----------|----------|
| 2h  | 1.33E-08  | 5.42E-09 | 1.53E-08 | 3.28E-08 |
| 6h  | 7.90E-09  | 1.29E-08 | 7.38E-08 | 2.82E-08 |
| 12h | 6.44E-10  | 5.22E-10 | 1.69E-09 | 4.98E-09 |
| 24h | 1.10E-08  | 3.39E-09 | 1.75E-08 | 4.30E-08 |
| 36h | 1.00E-08  | 3.53E-09 | 1.77E-08 | 3.66E-08 |
| 48h | 8.18E-08  | 1.12E-08 | 1.11E-08 | 2.40E-08 |
| 72h | 1.59E-08  | 2.90E-09 | 5.86E-09 | 9.93E-09 |
|     | cgd2_1740 |          |          |          |
| 2h  | 1.56E-07  | 1.04E-07 | 1.95E-08 | 7.02E-08 |
| 6h  | 1.84E-07  | 1.77E-07 | 1.40E-07 | 3.18E-07 |
| 12h | 5.47E-08  | 2.94E-08 | 1.17E-08 | 7.07E-08 |
| 24h | 1.62E-07  | 4.37E-08 | 8.89E-08 | 1.61E-07 |
| 36h | 1.86E-07  | 1.65E-07 | 1.13E-08 | 5.37E-08 |
| 48h | 2.73E-07  | 3.67E-07 | 6.46E-08 | 1.43E-07 |
| 72h | 8.27E-08  | 1.64E-07 | 9.94E-09 | 5.00E-08 |
|     | cgd2_1760 |          |          |          |
| 2h  | 3.12E-07  | 8.51E-07 | 7.65E-08 | 6.11E-07 |
| 6h  | 3.04E-07  | 2.36E-07 | 8.21E-08 | 3.30E-07 |
| 12h | 2.45E-07  | 1.41E-07 | 9.66E-08 | 4.18E-07 |
| 24h | 4.35E-07  | 1.55E-07 | 1.43E-07 | 4.31E-07 |
| 36h | 2.54E-07  | 2.10E-07 | 1.84E-08 | 6.11E-08 |
| 48h | 5.20E-07  | 4.27E-07 | 8.55E-08 | 2.67E-07 |
| 72h | 8.48E-08  | 1.73E-07 | 1.50E-08 | 7.94E-08 |
|     | cgd2_1800 |          |          |          |
| 2h  | 7.15E-08  | 5.88E-08 | 2.72E-08 | 5.95E-08 |
| 6h  | 3.11E-07  | 4.13E-07 | 1.70E-08 | 1.18E-07 |
| 12h | 4.89E-08  | 8.10E-08 | 1.25E-08 | 7.19E-08 |
| 24h | 2.55E-07  | 9.74E-08 | 1.48E-08 | 6.54E-08 |
| 36h | 2.26E-07  | 1.12E-07 | 3.99E-09 | 2.33E-08 |
| 48h | 9.41E-08  | 1.23E-07 | 5.00E-09 | 3.73E-08 |
| 72h | 4.09E-08  | 1.38E-08 | 7.65E-09 | 3.25E-08 |
|     | cgd2_1830 |          |          |          |
| 2h  | 8.94E-06  | 1.15E-05 | 5.12E-07 | 1.92E-05 |
| 6h  | 2.31E-06  | 3.45E-06 | 1.46E-07 | 3.84E-06 |
| 12h | 3.86E-07  | 8.04E-06 | 3.35E-08 | 2.37E-07 |
| 24h | 1.25E-06  | 1.70E-07 | 8.49E-08 | 1.08E-06 |
| 36h | 2.14E-06  | 1.32E-06 | 3.55E-09 | 8.75E-07 |
| 48h | 1.23E-06  | 1.20E-06 | 5.66E-08 | 1.01E-06 |
| 72h | 2.76E-06  | 3.35E-06 | 5.21E-08 | 2.31E-06 |
|     | cgd2_1850 |          |          |          |
| 2h  | 1.60E-07  | 8.57E-08 | 1.21E-07 | 7.93E-08 |
| 6h  | 3.13E-06  | 4.19E-07 | 2.19E-07 | 5.28E-07 |
| 12h | 8.35E-08  | 1.11E-07 | 5.25E-08 | 5.65E-08 |
| 24h | 4.23E-07  | 3.34E-07 | 8.91E-08 | 1.75E-07 |
| 36h | 5.20E-07  | 6.62E-07 | 1.26E-06 | 1.43E-07 |
| 48h | 2.46E-07  | 1.25E-07 | 2.14E-08 | 9.60E-08 |
| 72h | 3.78E-08  | 2.40E-08 | 5.20E-09 | 1.30E-08 |
|     | cgd2_1910 |          |          |          |
| 2h  | 0.00E+00  | 0.00E+00 | 0.00E+00 | 0.00E+00 |
| 6h  | 2.76E-10  | 0.00E+00 | 3.60E-09 | 0.00E+00 |
| 12h | 5.03E-08  | 3.58E-07 | 9.06E-09 | 1.39E-08 |
| 24h | 2.00E-07  | 5.33E-08 | 4.83E-08 | 5.73E-08 |
| 36h | 7.08E-07  | 1.90E-06 | 1.53E-08 | 3.61E-07 |



|     |           |          |          |          |
|-----|-----------|----------|----------|----------|
| 48h | 1.67E-06  | 2.80E-06 | 1.45E-07 | 9.74E-07 |
| 72h | 1.42E-05  | 1.25E-06 | 3.35E-07 | 1.13E-06 |
|     | cgd2_1920 |          |          |          |
| 2h  | 1.30E-07  | 0.00E+00 | 0.00E+00 | 0.00E+00 |
| 6h  | 9.75E-06  | 8.94E-06 | 1.15E-06 | 1.82E-05 |
| 12h | 5.55E-08  | 4.44E-07 | 2.18E-08 | 3.16E-07 |
| 24h | 3.03E-06  | 2.77E-06 | 3.55E-07 | 6.09E-06 |
| 36h | 1.75E-06  | 3.53E-06 | 1.51E-07 | 3.39E-06 |
| 48h | 6.37E-06  | 7.98E-05 | 2.50E-07 | 5.63E-06 |
| 72h | 6.24E-06  | 7.41E-06 | 2.15E-07 | 6.05E-06 |
|     | cgd2_1960 |          |          |          |
| 2h  | 0.00E+00  | 0.00E+00 | 0.00E+00 | 0.00E+00 |
| 6h  | 0.00E+00  | 0.00E+00 | 1.46E-08 | 2.49E-08 |
| 12h | 7.41E-08  | 1.49E-08 | 4.09E-08 | 9.21E-08 |
| 24h | 1.25E-08  | 4.20E-09 | 2.45E-08 | 5.35E-08 |
| 36h | 5.11E-08  | 9.73E-09 | 6.35E-08 | 1.88E-07 |
| 48h | 6.51E-07  | 3.05E-08 | 5.89E-08 | 1.70E-07 |
| 72h | 2.60E-08  | 1.75E-09 | 9.14E-09 | 4.81E-08 |
|     | cgd2_1330 |          |          |          |
| 2h  | 9.49E-07  | 8.48E-08 | 3.29E-06 | 5.55E-08 |
| 6h  | 2.11E-07  | 8.05E-08 | 1.77E-05 | 8.59E-08 |
| 12h | 6.56E-08  | 1.40E-07 | 2.34E-06 | 8.55E-08 |
| 24h | 2.06E-07  | 7.96E-08 | 6.48E-06 | 1.16E-07 |
| 36h | 1.09E-07  | 9.66E-08 | 7.99E-07 | 5.32E-08 |
| 48h | 4.09E-08  | 1.95E-07 | 4.21E-06 | 7.35E-07 |
| 72h | 2.70E-07  | 5.83E-08 | 5.09E-07 | 2.57E-07 |
|     | cgd2_1340 |          |          |          |
| 2h  | 2.87E-06  | 6.13E-07 | 2.79E-06 | 1.07E-07 |
| 6h  | 7.08E-06  | 1.82E-06 | 4.41E-06 | 2.32E-08 |
| 12h | 1.64E-07  | 1.70E-06 | 4.05E-06 | 4.22E-07 |
| 24h | 2.66E-06  | 2.18E-06 | 5.88E-06 | 1.19E-07 |
| 36h | 2.08E-06  | 3.55E-06 | 1.12E-06 | 4.80E-07 |
| 48h | 1.78E-06  | 1.26E-06 | 1.71E-06 | 1.13E-05 |
| 72h | 1.68E-06  | 6.55E-07 | 5.90E-07 | 4.61E-06 |
|     | cgd2_1380 |          |          |          |
| 2h  | 0.00E+00  | 7.96E-09 | 0.00E+00 | 1.36E-09 |
| 6h  | 5.07E-09  | 2.92E-09 | 5.60E-09 | 6.06E-11 |
| 12h | 0.00E+00  | 5.97E-10 | 1.94E-09 | 1.44E-10 |
| 24h | 1.31E-08  | 3.20E-09 | 1.33E-08 | 8.32E-11 |
| 36h | 3.59E-08  | 3.86E-08 | 1.33E-09 | 1.49E-09 |
| 48h | 5.29E-08  | 5.80E-08 | 4.95E-08 | 1.97E-07 |
| 72h | 7.62E-07  | 2.97E-07 | 3.08E-08 | 4.63E-07 |
|     | cgd2_1410 |          |          |          |
| 2h  | 1.30E-02  | 3.34E-04 | 6.08E-04 | 3.18E-04 |
| 6h  | 6.18E-04  | 2.86E-04 | 7.13E-04 | 4.44E-04 |
| 12h | 2.76E-04  | 3.45E-04 | 3.60E-04 | 2.54E-04 |
| 24h | 3.42E-04  | 1.97E-04 | 4.08E-04 | 3.50E-04 |
| 36h | 3.41E-04  | 4.02E-04 | 3.95E-04 | 4.20E-04 |
| 48h | 4.91E-04  | 2.01E-04 | 1.89E-04 | 3.83E-04 |
| 72h | 9.83E-04  | 1.31E-04 | 1.75E-04 | 1.91E-04 |
|     | cgd2_1420 |          |          |          |
| 2h  | 6.19E-07  | 7.38E-08 | 4.61E-08 | 2.71E-08 |
| 6h  | 5.09E-08  | 1.86E-08 | 5.01E-08 | 1.51E-08 |

|     |           |          |          |          |
|-----|-----------|----------|----------|----------|
| 12h | 9.10E-08  | 9.88E-08 | 8.12E-08 | 3.38E-08 |
| 24h | 5.57E-08  | 1.89E-08 | 2.27E-08 | 2.99E-08 |
| 36h | 8.23E-08  | 1.04E-07 | 3.93E-08 | 2.15E-08 |
| 48h | 7.54E-08  | 2.49E-08 | 3.69E-08 | 2.26E-07 |
| 72h | 3.27E-07  | 7.75E-08 | 1.25E-08 | 1.58E-07 |
|     | cgd2_1430 |          |          |          |
| 2h  | 0.00E+00  | 0.00E+00 | 0.00E+00 | 0.00E+00 |
| 6h  | 1.19E-06  | 6.48E-08 | 6.85E-07 | 4.90E-07 |
| 12h | 4.33E-08  | 8.78E-08 | 2.38E-07 | 0.00E+00 |
| 24h | 9.18E-07  | 2.36E-07 | 5.26E-06 | 2.45E-07 |
| 36h | 1.26E-06  | 6.40E-07 | 6.15E-07 | 6.96E-07 |
| 48h | 1.48E-06  | 5.27E-07 | 1.67E-06 | 6.24E-06 |
| 72h | 4.51E-06  | 6.12E-07 | 2.48E-06 | 5.41E-06 |
|     | cgd2_1440 |          |          |          |
| 2h  | 0.00E+00  | 6.67E-07 | 2.94E-10 | 0.00E+00 |
| 6h  | 2.31E-07  | 1.65E-07 | 2.83E-07 | 2.32E-07 |
| 12h | 5.82E-09  | 7.79E-09 | 7.11E-09 | 3.79E-09 |
| 24h | 4.65E-07  | 8.25E-08 | 1.25E-07 | 1.35E-07 |
| 36h | 1.25E-07  | 1.41E-07 | 1.16E-07 | 1.60E-07 |
| 48h | 1.92E-07  | 1.98E-07 | 1.38E-07 | 4.16E-07 |
| 72h | 2.17E-07  | 6.85E-08 | 3.14E-08 | 1.73E-07 |
|     | cgd2_1500 |          |          |          |
| 2h  | 2.72E-06  | 5.02E-07 | 1.13E-07 | 4.32E-08 |
| 6h  | 1.71E-06  | 8.48E-07 | 5.45E-07 | 1.01E-07 |
| 12h | 3.98E-07  | 7.46E-06 | 4.83E-07 | 1.63E-07 |
| 24h | 2.48E-06  | 1.48E-06 | 3.84E-07 | 9.59E-08 |
| 36h | 4.83E-07  | 1.56E-06 | 7.20E-08 | 1.50E-07 |
| 48h | 4.64E-07  | 3.58E-07 | 1.70E-07 | 7.67E-07 |
| 72h | 2.63E-07  | 8.80E-08 | 4.36E-08 | 8.55E-08 |
|     | cgd2_1590 |          |          |          |
| 2h  | 2.78E-08  | 4.43E-09 | 1.78E-10 | 0.00E+00 |
| 6h  | 0.00E+00  | 3.15E-09 | 9.35E-11 | 2.58E-10 |
| 12h | 0.00E+00  | 3.24E-10 | 2.00E-11 | 0.00E+00 |
| 24h | 1.89E-09  | 3.10E-10 | 8.28E-11 | 4.76E-11 |
| 36h | 3.31E-09  | 3.91E-09 | 3.40E-10 | 3.49E-10 |
| 48h | 2.16E-08  | 6.38E-08 | 2.05E-08 | 1.19E-07 |
| 72h | 2.84E-08  | 7.37E-09 | 4.60E-09 | 2.25E-08 |
|     | cgd2_1680 |          |          |          |
| 2h  | 1.38E-06  | 5.02E-08 | 2.45E-07 | 3.08E-08 |
| 6h  | 3.56E-08  | 4.50E-08 | 2.20E-07 | 1.69E-08 |
| 12h | 1.01E-08  | 2.03E-07 | 4.32E-07 | 4.31E-08 |
| 24h | 1.17E-07  | 7.70E-08 | 1.32E-07 | 2.54E-08 |
| 36h | 2.39E-07  | 2.11E-07 | 9.08E-08 | 1.52E-07 |
| 48h | 1.01E-07  | 1.05E-07 | 1.72E-07 | 1.17E-06 |
| 72h | 1.16E-07  | 2.00E-05 | 9.58E-08 | 8.14E-07 |
|     | cgd2_1690 |          |          |          |
| 2h  | 2.69E-08  | 2.30E-09 | 5.48E-09 | 1.62E-09 |
| 6h  | 7.75E-07  | 1.55E-06 | 1.90E-06 | 8.29E-07 |
| 12h | 4.72E-09  | 2.20E-08 | 1.93E-08 | 2.36E-08 |
| 24h | 4.34E-07  | 3.35E-07 | 8.35E-07 | 3.67E-07 |
| 36h | 3.65E-07  | 4.75E-07 | 3.81E-07 | 4.44E-07 |
| 48h | 6.39E-08  | 3.02E-07 | 3.45E-07 | 6.46E-07 |
| 72h | 1.20E-07  | 2.11E-08 | 3.71E-08 | 6.29E-08 |

|     |           |          |          |          |
|-----|-----------|----------|----------|----------|
|     | cgd2_1700 |          |          |          |
| 2h  | 3.23E-08  | 2.97E-09 | 0.00E+00 | 0.00E+00 |
| 6h  | 8.20E-09  | 1.52E-09 | 1.01E-09 | 9.27E-10 |
| 12h | 6.88E-09  | 2.47E-08 | 2.33E-08 | 7.10E-09 |
| 24h | 9.27E-09  | 8.07E-09 | 3.97E-09 | 2.13E-09 |
| 36h | 1.56E-07  | 1.63E-07 | 5.39E-08 | 4.91E-08 |
| 48h | 2.12E-08  | 8.68E-08 | 5.66E-08 | 3.34E-07 |
| 72h | 1.28E-07  | 5.84E-08 | 4.54E-08 | 3.69E-07 |
|     | cgd2_1710 |          |          |          |
| 2h  | 2.07E-07  | 2.06E-04 | 1.96E-06 | 0.00E+00 |
| 6h  | 2.16E-07  | 1.20E-05 | 4.11E-05 | 3.76E-05 |
| 12h | 8.77E-07  | 6.99E-05 | 1.56E-05 | 1.23E-05 |
| 24h | 4.12E-06  | 1.31E-04 | 9.42E-06 | 9.00E-06 |
| 36h | 2.59E-05  | 1.58E-04 | 5.25E-05 | 6.35E-05 |
| 48h | 3.84E-04  | 1.02E-03 | 3.74E-04 | 1.31E-03 |
| 72h | 5.67E-06  | 1.73E-04 | 3.47E-05 | 4.12E-04 |
|     | cgd2_1750 |          |          |          |
| 2h  | 4.51E-08  | 3.55E-07 | 5.20E-07 | 8.68E-08 |
| 6h  | 6.22E-08  | 4.82E-07 | 3.20E-07 | 1.56E-07 |
| 12h | 0.00E+00  | 5.40E-07 | 2.56E-07 | 1.50E-07 |
| 24h | 2.60E-07  | 1.24E-06 | 3.25E-07 | 3.95E-07 |
| 36h | 1.35E-07  | 2.61E-07 | 9.73E-08 | 1.56E-07 |
| 48h | 7.67E-08  | 3.04E-07 | 2.50E-07 | 7.76E-07 |
| 72h | 2.20E-08  | 2.30E-07 | 6.12E-08 | 8.36E-07 |
|     | cgd2_1810 |          |          |          |
| 2h  | 5.56E-09  | 1.02E-08 | 5.74E-09 | 8.59E-09 |
| 6h  | 8.14E-08  | 2.38E-07 | 1.31E-07 | 1.44E-07 |
| 12h | 0.00E+00  | 8.69E-09 | 6.11E-09 | 2.14E-09 |
| 24h | 1.50E-07  | 1.06E-07 | 6.54E-08 | 3.12E-08 |
| 36h | 7.67E-08  | 4.70E-08 | 2.89E-08 | 4.41E-08 |
| 48h | 4.57E-08  | 9.48E-08 | 3.46E-08 | 1.91E-07 |
| 72h | 2.25E-08  | 1.10E-08 | 9.60E-09 | 7.54E-08 |
|     | cgd2_1870 |          |          |          |
| 2h  | 5.34E-07  | 3.15E-06 | 8.90E-07 | 3.08E-07 |
| 6h  | 2.88E-06  | 4.76E-06 | 9.13E-06 | 1.07E-06 |
| 12h | 6.72E-07  | 2.56E-06 | 4.40E-06 | 6.31E-07 |
| 24h | 5.37E-06  | 1.76E-06 | 5.89E-06 | 5.40E-07 |
| 36h | 2.63E-06  | 4.32E-06 | 1.28E-06 | 6.99E-07 |
| 48h | 8.53E-07  | 1.79E-06 | 9.08E-07 | 4.40E-06 |
| 72h | 1.49E-07  | 1.96E-07 | 5.05E-08 | 6.56E-07 |
|     | cgd2_1880 |          |          |          |
| 2h  | 6.25E-09  | 7.69E-08 | 2.20E-08 | 8.10E-09 |
| 6h  | 6.45E-09  | 2.63E-09 | 4.83E-09 | 3.61E-09 |
| 12h | 5.66E-08  | 2.45E-08 | 7.36E-09 | 5.85E-09 |
| 24h | 1.86E-08  | 3.12E-08 | 5.10E-09 | 3.79E-09 |
| 36h | 3.08E-08  | 6.73E-08 | 9.70E-09 | 1.82E-08 |
| 48h | 4.54E-08  | 2.67E-07 | 4.72E-08 | 3.38E-07 |
| 72h | 7.64E-08  | 6.91E-08 | 4.26E-08 | 3.09E-07 |
|     | cgd2_1900 |          |          |          |
| 2h  | 1.08E-08  | 9.34E-09 | 7.23E-08 | 1.24E-08 |
| 6h  | 2.06E-08  | 1.38E-07 | 1.60E-07 | 2.80E-08 |
| 12h | 3.99E-09  | 1.60E-07 | 3.17E-08 | 8.94E-09 |
| 24h | 8.32E-08  | 2.19E-07 | 8.18E-08 | 3.50E-08 |

|     |           |          |          |          |
|-----|-----------|----------|----------|----------|
| 36h | 1.86E-07  | 6.36E-07 | 1.02E-07 | 2.00E-07 |
| 48h | 1.50E-07  | 1.29E-06 | 2.68E-07 | 2.84E-06 |
| 72h | 4.03E-07  | 3.96E-07 | 3.31E-07 | 1.58E-06 |
|     | cgd2_1950 |          |          |          |
| 2h  | 9.15E-09  | 1.86E-06 | 3.65E-07 | 1.21E-07 |
| 6h  | 1.29E-07  | 2.03E-06 | 1.49E-06 | 1.76E-07 |
| 12h | 7.12E-06  | 8.88E-07 | 2.92E-07 | 9.58E-08 |
| 24h | 7.11E-07  | 1.31E-06 | 5.89E-07 | 3.00E-07 |
| 36h | 3.09E-07  | 1.33E-06 | 8.55E-08 | 2.60E-07 |
| 48h | 1.52E-07  | 9.14E-07 | 2.49E-07 | 1.93E-06 |
| 72h | 6.96E-08  | 2.56E-07 | 5.51E-08 | 9.48E-07 |
|     | cgd2_1940 |          |          |          |
| 2h  | 0.00E+00  | 1.38E-09 | 1.71E-09 | 0.00E+00 |
| 6h  | 5.21E-08  | 8.61E-08 | 2.30E-07 | 5.36E-08 |
| 12h | 4.91E-07  | 1.42E-08 | 4.57E-09 | 4.92E-10 |
| 24h | 5.76E-08  | 8.23E-08 | 4.07E-08 | 2.69E-08 |
| 36h | 4.01E-08  | 1.18E-07 | 3.62E-08 | 5.30E-08 |
| 48h | 2.68E-08  | 5.08E-08 | 3.67E-08 | 1.58E-07 |
| 72h | 2.59E-08  | 2.24E-08 | 1.05E-08 | 1.18E-07 |
|     | cgd2_1980 |          |          |          |
| 2h  | 9.27E-08  | 1.27E-08 | 5.76E-09 | 1.25E-09 |
| 6h  | 2.73E-09  | 3.38E-08 | 1.25E-08 | 9.17E-09 |
| 12h | 4.17E-08  | 4.31E-08 | 6.60E-09 | 8.85E-11 |
| 24h | 1.42E-08  | 5.10E-08 | 8.76E-09 | 2.07E-09 |
| 36h | 4.65E-08  | 9.91E-08 | 1.79E-08 | 3.71E-08 |
| 48h | 1.53E-08  | 5.28E-08 | 5.16E-08 | 3.09E-07 |
| 72h | 3.33E-08  | 8.60E-08 | 1.29E-08 | 1.80E-07 |
|     | cgd2_2000 |          |          |          |
| 2h  | 1.36E-07  | 1.11E-05 | 3.38E-08 | 0.00E+00 |
| 6h  | 2.30E-06  | 2.49E-05 | 1.29E-05 | 4.53E-05 |
| 12h | 2.56E-06  | 1.67E-04 | 2.45E-05 | 1.43E-05 |
| 24h | 5.12E-06  | 6.34E-05 | 1.30E-05 | 2.28E-05 |
| 36h | 3.55E-05  | 1.30E-04 | 4.61E-05 | 1.64E-04 |
| 48h | 1.52E-05  | 1.10E-04 | 4.01E-05 | 2.21E-04 |
| 72h | 3.42E-05  | 1.92E-04 | 1.57E-05 | 1.01E-04 |
|     | cgd2_2020 |          |          |          |
| 2h  | 5.83E-08  | 3.87E-09 | 8.21E-10 | 0.00E+00 |
| 6h  | 1.06E-07  | 2.95E-07 | 1.97E-07 | 7.17E-08 |
| 12h | 7.87E-08  | 2.52E-08 | 2.69E-09 | 1.15E-08 |
| 24h | 1.38E-07  | 7.78E-07 | 9.11E-08 | 1.03E-07 |
| 36h | 7.43E-08  | 3.40E-07 | 2.88E-08 | 6.53E-08 |
| 48h | 1.85E-08  | 3.18E-07 | 4.18E-08 | 2.80E-07 |
| 72h | 1.29E-08  | 2.87E-08 | 1.13E-08 | 9.71E-08 |
|     | cgd2_1730 |          |          |          |
| 2h  | 6.80E-08  | 1.08E-06 | 3.21E-09 | 3.34E-08 |
| 6h  | 1.40E-07  | 1.58E-06 | 1.24E-06 | 3.09E-07 |
| 12h | 1.54E-08  | 3.12E-07 | 4.30E-08 | 2.00E-08 |
| 24h | 5.30E-07  | 1.36E-06 | 4.66E-07 | 3.57E-07 |
| 36h | 6.24E-07  | 3.14E-06 | 8.77E-07 | 1.86E-06 |
| 48h | 4.55E-07  | 1.36E-06 | 3.56E-07 | 2.28E-06 |
| 72h | 1.85E-07  | 1.44E-06 | 3.73E-07 | 4.54E-06 |
|     | cgd2_2060 |          |          |          |
| 2h  | 2.07E-07  | 1.72E-05 | 7.70E-07 | 4.21E-08 |

|     |           |          |          |          |
|-----|-----------|----------|----------|----------|
| 6h  | 2.16E-07  | 2.48E-05 | 1.32E-06 | 8.28E-07 |
| 12h | 8.77E-07  | 2.43E-06 | 3.14E-07 | 4.83E-08 |
| 24h | 4.12E-06  | 4.17E-06 | 1.13E-06 | 3.10E-07 |
| 36h | 2.59E-05  | 6.10E-06 | 2.25E-07 | 2.00E-07 |
| 48h | 3.84E-04  | 4.27E-06 | 9.05E-07 | 2.89E-06 |
| 72h | 5.67E-06  | 9.48E-07 | 2.35E-07 | 7.99E-07 |
|     | cgd2_2080 |          |          |          |
| 2h  | 4.07E-09  | 3.00E-08 | 5.87E-08 | 1.35E-07 |
| 6h  | 1.28E-09  | 1.14E-08 | 5.03E-08 | 6.31E-08 |
| 12h | 0.00E+00  | 3.94E-09 | 9.57E-09 | 2.96E-08 |
| 24h | 8.95E-09  | 3.36E-09 | 1.53E-08 | 6.34E-08 |
| 36h | 4.37E-09  | 1.81E-09 | 5.72E-09 | 2.82E-08 |
| 48h | 8.49E-08  | 1.03E-08 | 2.70E-08 | 9.65E-08 |
| 72h | 8.01E-09  | 1.06E-08 | 1.99E-08 | 3.55E-07 |
|     | cgd2_1550 |          |          |          |
| 2h  | 5.56E-09  | 3.50E-05 | 2.83E-06 | 7.10E-08 |
| 6h  | 8.14E-08  | 2.40E-05 | 9.91E-07 | 9.07E-09 |
| 12h | 0.00E+00  | 2.29E-05 | 1.76E-06 | 5.60E-08 |
| 24h | 1.50E-07  | 9.30E-06 | 1.45E-06 | 2.80E-07 |
| 36h | 7.67E-08  | 2.55E-05 | 8.72E-07 | 1.74E-07 |
| 48h | 4.57E-08  | 1.62E-05 | 2.95E-06 | 7.10E-06 |
| 72h | 2.25E-08  | 3.28E-06 | 1.63E-07 | 8.51E-07 |
|     | cgd2_1780 |          |          |          |
| 2h  | 0.00E+00  | 0.00E+00 | 0.00E+00 | 0.00E+00 |
| 6h  | 2.88E-06  | 9.13E-04 | 6.04E-05 | 4.50E-06 |
| 12h | 6.72E-07  | 2.06E-05 | 8.18E-07 | 0.00E+00 |
| 24h | 5.37E-06  | 3.71E-05 | 2.32E-05 | 5.47E-06 |
| 36h | 2.63E-06  | 2.66E-04 | 1.70E-04 | 3.62E-05 |
| 48h | 8.53E-07  | 4.49E-05 | 1.02E-05 | 1.30E-05 |
| 72h | 1.49E-07  | 6.48E-06 | 7.54E-07 | 3.59E-06 |
|     | cgd2_1820 |          |          |          |
| 2h  | 6.25E-09  | 1.07E-07 | 4.00E-07 | 4.76E-08 |
| 6h  | 6.45E-09  | 5.24E-08 | 8.76E-08 | 1.93E-08 |
| 12h | 5.66E-08  | 1.80E-07 | 1.80E-07 | 9.33E-08 |
| 24h | 1.86E-08  | 4.98E-08 | 8.33E-08 | 3.20E-08 |
| 36h | 3.08E-08  | 1.07E-07 | 1.18E-07 | 2.89E-08 |
| 48h | 4.54E-08  | 8.28E-08 | 1.10E-07 | 1.79E-07 |
| 72h | 7.64E-08  | 4.08E-08 | 1.39E-08 | 7.03E-08 |
|     | cgd2_1840 |          |          |          |
| 2h  | 1.08E-08  | 1.09E-03 | 1.84E-04 | 1.85E-05 |
| 6h  | 2.06E-08  | 3.55E-04 | 1.62E-05 | 2.29E-06 |
| 12h | 3.99E-09  | 8.97E-04 | 1.95E-04 | 8.23E-06 |
| 24h | 8.32E-08  | 3.52E-04 | 7.27E-05 | 3.60E-06 |
| 36h | 1.86E-07  | 1.84E-04 | 7.48E-05 | 7.34E-06 |
| 48h | 1.50E-07  | 1.84E-04 | 1.42E-04 | 3.66E-04 |
| 72h | 4.03E-07  | 5.93E-05 | 1.75E-05 | 4.64E-05 |
|     | cgd2_1280 |          |          |          |
| 2h  | 0.00E+00  | 1.34E-09 | 0.00E+00 | 0.00E+00 |
| 6h  | 1.29E-07  | 7.10E-08 | 1.54E-08 | 1.04E-08 |
| 12h | 0.00E+00  | 1.16E-08 | 2.70E-09 | 6.95E-08 |
| 24h | 7.11E-07  | 4.53E-08 | 2.07E-08 | 3.75E-09 |
| 36h | 3.09E-07  | 8.87E-08 | 4.38E-07 | 3.41E-09 |
| 48h | 1.52E-07  | 8.51E-08 | 3.65E-08 | 1.14E-07 |

|     |           |          |          |          |
|-----|-----------|----------|----------|----------|
| 72h | 6.96E-08  | 1.48E-08 | 1.10E-08 | 8.09E-08 |
|     | cgd2_2100 |          |          |          |
| 2h  | 0.00E+00  | 0.00E+00 | 0.00E+00 | 0.00E+00 |
| 6h  | 0.00E+00  | 0.00E+00 | 0.00E+00 | 0.00E+00 |
| 12h | 4.91E-07  | 4.09E-10 | 0.00E+00 | 0.00E+00 |
| 24h | 5.76E-08  | 8.63E-11 | 0.00E+00 | 0.00E+00 |
| 36h | 4.01E-08  | 1.58E-09 | 1.66E-09 | 2.97E-10 |
| 48h | 2.68E-08  | 5.01E-08 | 1.57E-07 | 1.37E-07 |
| 72h | 2.59E-08  | 6.37E-07 | 1.63E-06 | 2.48E-06 |
|     | cgd2_2130 |          |          |          |
| 2h  | 9.27E-08  | 3.46E-08 | 9.62E-09 | 3.37E-07 |
| 6h  | 2.73E-09  | 1.03E-07 | 9.74E-08 | 5.64E-06 |
| 12h | 4.17E-08  | 2.21E-06 | 1.94E-07 | 0.00E+00 |
| 24h | 1.42E-08  | 2.54E-07 | 1.21E-07 | 1.56E-09 |
| 36h | 4.65E-08  | 1.16E-06 | 1.60E-07 | 3.68E-08 |
| 48h | 1.53E-08  | 5.00E-07 | 3.46E-07 | 1.51E-06 |
| 72h | 3.33E-08  | 6.57E-07 | 6.06E-07 | 1.41E-06 |
|     | cgd2_2140 |          |          |          |
| 2h  | 0.00E+00  | 1.46E-05 | 0.00E+00 | 0.00E+00 |
| 6h  | 0.00E+00  | 5.17E-07 | 0.00E+00 | 0.00E+00 |
| 12h | 2.56E-06  | 5.72E-05 | 8.82E-06 | 0.00E+00 |
| 24h | 5.12E-06  | 2.02E-06 | 3.56E-06 | 0.00E+00 |
| 36h | 3.55E-05  | 8.65E-05 | 2.56E-05 | 5.18E-05 |
| 48h | 1.52E-05  | 1.02E-04 | 4.91E-05 | 2.37E-04 |
| 72h | 3.42E-05  | 1.53E-05 | 1.34E-04 | 7.36E-05 |
|     | cgd2_2160 |          |          |          |
| 2h  | 5.83E-08  | 6.72E-08 | 8.52E-09 | 0.00E+00 |
| 6h  | 1.06E-07  | 3.51E-06 | 1.83E-06 | 1.09E-07 |
| 12h | 7.87E-08  | 1.41E-07 | 1.62E-08 | 0.00E+00 |
| 24h | 1.38E-07  | 1.52E-06 | 8.82E-07 | 9.25E-08 |
| 36h | 7.43E-08  | 2.18E-06 | 2.04E-07 | 1.32E-07 |
| 48h | 1.85E-08  | 1.50E-06 | 2.51E-07 | 2.34E-06 |
| 72h | 1.29E-08  | 1.02E-07 | 6.47E-08 | 5.36E-07 |
|     | cgd2_2040 |          |          |          |
| 2h  | 6.80E-08  | 5.14E-04 | 7.06E-05 | 1.60E-05 |
| 6h  | 1.40E-07  | 1.35E-04 | 8.12E-06 | 1.25E-06 |
| 12h | 1.54E-08  | 4.85E-05 | 5.15E-06 | 3.35E-06 |
| 24h | 5.30E-07  | 3.78E-05 | 4.02E-06 | 3.43E-07 |
| 36h | 6.24E-07  | 2.15E-04 | 1.28E-04 | 9.53E-07 |
| 48h | 4.55E-07  | 6.61E-05 | 1.63E-06 | 5.67E-06 |
| 72h | 1.85E-07  | 1.14E-04 | 9.44E-06 | 1.86E-05 |
|     | cgd2_2210 |          |          |          |
| 2h  | 1.08E-07  | 1.18E-07 | 5.87E-08 | 1.30E-06 |
| 6h  | 1.54E-06  | 2.84E-06 | 2.40E-06 | 2.05E-06 |
| 12h | 4.25E-09  | 1.36E-06 | 1.35E-07 | 8.16E-07 |
| 24h | 3.55E-06  | 2.09E-06 | 6.99E-07 | 3.76E-06 |
| 36h | 1.04E-06  | 3.46E-06 | 1.21E-07 | 1.79E-06 |
| 48h | 1.93E-06  | 5.85E-06 | 1.84E-06 | 6.79E-06 |
| 72h | 1.95E-06  | 2.00E-06 | 4.30E-07 | 4.80E-06 |
|     | cgd2_2220 |          |          |          |
| 2h  | 6.50E-08  | 2.82E-06 | 1.41E-05 | 1.30E-06 |
| 6h  | 1.05E-05  | 5.60E-05 | 2.24E-05 | 4.75E-05 |
| 12h | 7.40E-07  | 8.54E-06 | 2.03E-07 | 2.89E-06 |

|     |           |          |          |          |
|-----|-----------|----------|----------|----------|
| 24h | 7.70E-05  | 4.27E-05 | 6.60E-06 | 3.60E-05 |
| 36h | 6.07E-06  | 2.50E-05 | 2.16E-06 | 1.96E-05 |
| 48h | 3.56E-06  | 1.60E-05 | 4.57E-06 | 2.05E-05 |
| 72h | 3.36E-06  | 1.55E-05 | 7.98E-07 | 2.36E-05 |
|     | cgd2_2230 |          |          |          |
| 2h  | 1.54E-06  | 2.45E-06 | 4.34E-07 | 1.97E-07 |
| 6h  | 3.01E-07  | 3.65E-07 | 1.87E-07 | 3.02E-08 |
| 12h | 4.35E-07  | 2.76E-06 | 3.15E-07 | 9.36E-08 |
| 24h | 1.20E-06  | 3.80E-07 | 6.75E-08 | 9.34E-08 |
| 36h | 3.88E-07  | 9.38E-07 | 2.90E-08 | 5.65E-08 |
| 48h | 8.79E-07  | 3.06E-07 | 9.67E-08 | 8.45E-07 |
| 72h | 2.38E-07  | 6.19E-08 | 3.77E-08 | 2.61E-07 |
|     | cgd2_2260 |          |          |          |
| 2h  | 1.11E-05  | 3.65E-04 | 8.55E-05 | 3.76E-05 |
| 6h  | 4.46E-06  | 1.29E-05 | 7.33E-07 | 2.98E-06 |
| 12h | 1.65E-05  | 2.54E-04 | 3.77E-05 | 5.36E-05 |
| 24h | 7.63E-05  | 1.77E-05 | 4.20E-06 | 1.34E-05 |
| 36h | 2.27E-06  | 5.73E-05 | 3.00E-06 | 1.05E-05 |
| 48h | 6.77E-06  | 6.80E-06 | 2.00E-06 | 3.36E-05 |
| 72h | 2.27E-06  | 1.03E-05 | 6.05E-07 | 2.45E-05 |
|     | cgd2_2270 |          |          |          |
| 2h  | 8.24E-08  | 4.49E-08 | 2.07E-07 | 1.09E-08 |
| 6h  | 1.17E-07  | 3.75E-08 | 4.34E-08 | 1.85E-08 |
| 12h | 1.76E-08  | 4.75E-08 | 9.75E-09 | 9.03E-09 |
| 24h | 2.29E-07  | 6.47E-08 | 1.94E-08 | 2.72E-08 |
| 36h | 5.32E-08  | 1.98E-07 | 2.35E-08 | 4.91E-08 |
| 48h | 2.38E-07  | 5.63E-08 | 2.17E-08 | 2.40E-07 |
| 72h | 6.15E-08  | 3.06E-08 | 6.84E-09 | 1.28E-07 |
|     | cgd2_2280 |          |          |          |
| 2h  | 1.29E-06  | 9.41E-07 | 6.71E-07 | 0.00E+00 |
| 6h  | 2.93E-09  | 7.50E-08 | 3.13E-08 | 0.00E+00 |
| 12h | 1.09E-06  | 3.13E-05 | 4.45E-07 | 1.16E-06 |
| 24h | 2.23E-05  | 8.92E-06 | 9.70E-07 | 7.33E-07 |
| 36h | 2.42E-06  | 4.06E-05 | 2.91E-07 | 3.70E-06 |
| 48h | 5.90E-06  | 4.51E-05 | 3.12E-06 | 5.19E-05 |
| 72h | 9.82E-07  | 4.57E-06 | 4.07E-07 | 3.16E-05 |
|     | cgd2_2290 |          |          |          |
| 2h  | 1.11E-07  | 1.93E-07 | 9.07E-08 | 3.24E-08 |
| 6h  | 6.77E-08  | 1.66E-07 | 6.00E-08 | 2.21E-08 |
| 12h | 5.66E-09  | 3.57E-07 | 7.35E-08 | 2.01E-08 |
| 24h | 5.79E-07  | 2.85E-07 | 4.19E-08 | 3.89E-08 |
| 36h | 1.10E-07  | 3.31E-07 | 9.10E-09 | 3.10E-08 |
| 48h | 1.23E-07  | 8.80E-08 | 4.83E-08 | 5.08E-07 |
| 72h | 5.50E-08  | 6.86E-08 | 1.24E-08 | 6.74E-07 |
|     | cgd2_2320 |          |          |          |
| 2h  | 1.41E-09  | 1.28E-08 | 2.08E-08 | 0.00E+00 |
| 6h  | 2.13E-08  | 3.85E-09 | 6.06E-07 | 0.00E+00 |
| 12h | 0.00E+00  | 3.90E-08 | 5.63E-09 | 1.19E-09 |
| 24h | 2.23E-08  | 5.14E-09 | 3.66E-09 | 1.53E-10 |
| 36h | 2.69E-08  | 1.71E-07 | 1.31E-08 | 5.18E-09 |
| 48h | 4.48E-08  | 3.06E-08 | 7.19E-09 | 5.09E-08 |
| 72h | 3.64E-08  | 1.38E-08 | 7.86E-09 | 1.22E-07 |
|     | cgd2_2340 |          |          |          |

|     |           |          |          |          |
|-----|-----------|----------|----------|----------|
| 2h  | 0.00E+00  | 0.00E+00 | 5.78E-08 | 3.92E-09 |
| 6h  | 0.00E+00  | 2.59E-09 | 1.21E-08 | 9.12E-11 |
| 12h | 4.21E-08  | 2.10E-07 | 1.91E-08 | 5.68E-08 |
| 24h | 8.35E-08  | 1.71E-08 | 9.33E-09 | 3.96E-09 |
| 36h | 6.76E-08  | 3.96E-07 | 1.84E-08 | 1.42E-07 |
| 48h | 1.62E-07  | 9.92E-08 | 9.69E-08 | 5.85E-07 |
| 72h | 4.87E-07  | 2.79E-07 | 3.90E-08 | 1.40E-06 |
|     | cgd2_2350 |          |          |          |
| 2h  | 1.82E-07  | 7.96E-08 | 1.31E-03 | 0.00E+00 |
| 6h  | 8.21E-08  | 7.11E-08 | 4.49E-05 | 2.28E-08 |
| 12h | 3.99E-08  | 7.30E-07 | 3.78E-06 | 3.27E-08 |
| 24h | 4.84E-06  | 8.25E-08 | 2.26E-07 | 5.01E-09 |
| 36h | 1.42E-07  | 3.84E-07 | 8.18E-05 | 1.78E-08 |
| 48h | 1.12E-07  | 1.53E-07 | 6.67E-08 | 2.23E-07 |
| 72h | 1.34E-07  | 1.01E-07 | 1.31E-06 | 5.20E-07 |
|     | cgd2_2360 |          |          |          |
| 2h  | 1.07E-08  | 8.03E-08 | 1.34E-06 | 0.00E+00 |
| 6h  | 1.61E-06  | 2.74E-06 | 6.62E-07 | 6.83E-08 |
| 12h | 5.89E-09  | 2.16E-06 | 3.54E-08 | 1.86E-08 |
| 24h | 5.30E-06  | 1.47E-06 | 5.11E-07 | 6.52E-08 |
| 36h | 6.86E-06  | 6.12E-06 | 3.60E-08 | 1.25E-07 |
| 48h | 4.79E-07  | 1.33E-06 | 3.15E-07 | 2.62E-06 |
| 72h | 7.45E-07  | 5.49E-07 | 4.77E-08 | 1.77E-06 |
|     | cgd2_2380 |          |          |          |
| 2h  | 6.82E-08  | 0.00E+00 | 0.00E+00 | 0.00E+00 |
| 6h  | 1.16E-06  | 1.57E-05 | 8.95E-05 | 9.58E-06 |
| 12h | 7.95E-06  | 1.36E-04 | 1.04E-05 | 1.08E-05 |
| 24h | 1.67E-04  | 5.50E-05 | 2.11E-05 | 5.44E-05 |
| 36h | 1.22E-05  | 1.06E-04 | 2.20E-05 | 1.04E-05 |
| 48h | 4.55E-06  | 1.20E-04 | 1.94E-05 | 1.96E-04 |
| 72h | 6.32E-06  | 2.68E-05 | 3.26E-06 | 8.80E-05 |
|     | cgd2_2390 |          |          |          |
| 2h  | 2.99E-08  | 1.81E-08 | 7.01E-08 | 1.51E-08 |
| 6h  | 6.33E-08  | 6.91E-08 | 1.01E-07 | 9.72E-08 |
| 12h | 1.42E-08  | 1.11E-08 | 1.84E-08 | 3.74E-08 |
| 24h | 4.02E-08  | 4.22E-08 | 5.12E-08 | 8.90E-08 |
| 36h | 4.14E-08  | 5.35E-08 | 4.70E-08 | 6.71E-08 |
| 48h | 9.56E-08  | 4.34E-08 | 5.28E-08 | 1.05E-07 |
| 72h | 2.51E-08  | 5.34E-09 | 1.12E-08 | 5.30E-08 |
|     | cgd2_2410 |          |          |          |
| 2h  | 4.85E-07  | 1.15E-06 | 1.36E-06 | 3.23E-08 |
| 6h  | 8.29E-07  | 3.33E-07 | 3.39E-07 | 2.40E-08 |
| 12h | 1.68E-07  | 1.19E-06 | 3.43E-07 | 6.44E-08 |
| 24h | 8.92E-07  | 2.63E-07 | 5.77E-07 | 1.00E-07 |
| 36h | 9.13E-07  | 1.22E-06 | 2.22E-07 | 1.77E-07 |
| 48h | 7.45E-07  | 4.97E-07 | 3.20E-07 | 2.51E-06 |
| 72h | 2.30E-07  | 1.80E-07 | 1.21E-07 | 7.35E-07 |
|     | cgd2_2430 |          |          |          |
| 2h  | 9.81E-07  | 1.67E-06 | 2.00E-07 | 2.29E-08 |
| 6h  | 3.24E-06  | 1.47E-06 | 5.25E-07 | 1.26E-08 |
| 12h | 3.23E-07  | 1.21E-06 | 8.69E-07 | 1.44E-07 |
| 24h | 3.65E-06  | 1.03E-06 | 6.79E-07 | 3.71E-08 |
| 36h | 3.56E-06  | 3.45E-06 | 2.84E-07 | 4.33E-07 |



|     |           |          |          |          |
|-----|-----------|----------|----------|----------|
| 48h | 2.73E-06  | 1.46E-06 | 3.81E-07 | 3.63E-06 |
| 72h | 1.29E-06  | 4.31E-07 | 1.52E-07 | 8.47E-07 |
|     | cgd2_2450 |          |          |          |
| 2h  | 6.03E-07  | 1.09E-06 | 1.90E-07 | 2.16E-08 |
| 6h  | 2.05E-07  | 8.35E-08 | 3.20E-08 | 3.59E-09 |
| 12h | 4.39E-07  | 3.99E-07 | 1.37E-07 | 1.27E-07 |
| 24h | 5.01E-07  | 5.95E-08 | 6.78E-08 | 9.50E-09 |
| 36h | 4.87E-07  | 1.02E-06 | 8.33E-08 | 8.18E-08 |
| 48h | 1.05E-07  | 1.92E-07 | 1.26E-07 | 3.42E-07 |
| 72h | 8.99E-07  | 6.43E-08 | 5.91E-08 | 3.78E-07 |
|     | cgd2_2460 |          |          |          |
| 2h  | 1.13E-07  | 9.03E-08 | 5.69E-08 | 1.51E-08 |
| 6h  | 1.05E-07  | 8.29E-08 | 6.18E-08 | 1.32E-07 |
| 12h | 1.85E-07  | 4.46E-08 | 1.43E-07 | 1.72E-07 |
| 24h | 6.71E-08  | 5.07E-08 | 1.05E-07 | 7.51E-08 |
| 36h | 1.32E-07  | 2.03E-07 | 1.67E-07 | 1.24E-07 |
| 48h | 5.26E-08  | 7.50E-08 | 9.03E-08 | 2.00E-07 |
| 72h | 8.61E-08  | 5.10E-08 | 3.62E-08 | 1.77E-07 |
|     | cgd2_2480 |          |          |          |
| 2h  | 1.25E-04  | 5.50E-06 | 9.89E-05 | 0.00E+00 |
| 6h  | 1.20E-04  | 2.73E-04 | 1.44E-04 | 2.07E-04 |
| 12h | 5.64E-04  | 2.39E-05 | 1.68E-04 | 1.66E-04 |
| 24h | 1.37E-04  | 4.40E-05 | 3.42E-04 | 2.07E-05 |
| 36h | 1.18E-04  | 4.62E-05 | 1.38E-04 | 3.57E-05 |
| 48h | 4.23E-05  | 2.98E-05 | 2.49E-05 | 5.73E-05 |
| 72h | 4.67E-05  | 8.18E-06 | 6.56E-05 | 3.90E-05 |
|     | cgd2_2490 |          |          |          |
| 2h  | 0.00E+00  | 0.00E+00 | 0.00E+00 | 0.00E+00 |
| 6h  | 0.00E+00  | 0.00E+00 | 2.60E-08 | 0.00E+00 |
| 12h | 0.00E+00  | 8.43E-10 | 0.00E+00 | 0.00E+00 |
| 24h | 5.62E-09  | 1.92E-09 | 4.30E-09 | 9.83E-09 |
| 36h | 2.68E-09  | 4.24E-09 | 1.04E-08 | 3.91E-08 |
| 48h | 4.51E-09  | 2.30E-08 | 2.26E-08 | 4.77E-08 |
| 72h | 2.72E-08  | 6.74E-08 | 7.89E-09 | 2.22E-07 |
|     | cgd2_2500 |          |          |          |
| 2h  | 0.00E+00  | 0.00E+00 | 0.00E+00 | 0.00E+00 |
| 6h  | 1.55E-04  | 2.64E-05 | 2.04E-05 | 1.42E-06 |
| 12h | 0.00E+00  | 5.28E-06 | 2.97E-06 | 0.00E+00 |
| 24h | 1.47E-04  | 1.96E-05 | 1.19E-05 | 4.32E-06 |
| 36h | 1.34E-04  | 4.51E-04 | 2.59E-05 | 7.87E-05 |
| 48h | 5.65E-05  | 1.79E-04 | 1.17E-05 | 1.08E-04 |
| 72h | 1.20E-04  | 1.63E-04 | 2.61E-05 | 1.27E-04 |
|     | cgd2_2510 |          |          |          |
| 2h  | 3.08E-07  | 0.00E+00 | 0.00E+00 | 0.00E+00 |
| 6h  | 0.00E+00  | 4.50E-07 | 2.46E-07 | 0.00E+00 |
| 12h | 0.00E+00  | 6.79E-08 | 0.00E+00 | 0.00E+00 |
| 24h | 3.44E-07  | 1.57E-07 | 6.15E-08 | 1.12E-07 |
| 36h | 2.94E-06  | 7.04E-07 | 1.54E-07 | 1.25E-07 |
| 48h | 8.23E-05  | 1.41E-04 | 5.58E-05 | 7.60E-05 |
| 72h | 6.48E-06  | 4.83E-06 | 1.91E-06 | 7.43E-06 |
|     | cgd2_2530 |          |          |          |
| 2h  | 4.02E-03  | 1.15E-03 | 1.82E-04 | 9.62E-06 |
| 6h  | 4.94E-04  | 3.84E-04 | 7.35E-05 | 1.13E-05 |

|     |           |          |          |          |
|-----|-----------|----------|----------|----------|
| 12h | 7.08E-03  | 6.06E-04 | 7.58E-04 | 7.92E-04 |
| 24h | 1.23E-03  | 7.46E-05 | 4.58E-04 | 1.15E-04 |
| 36h | 3.03E-03  | 2.33E-03 | 1.61E-03 | 6.97E-04 |
| 48h | 2.59E-03  | 1.16E-03 | 8.82E-04 | 2.74E-03 |
| 72h | 4.30E-04  | 7.97E-04 | 6.46E-05 | 8.78E-05 |
|     | cgd2_2540 |          |          |          |
| 2h  | 5.80E-07  | 1.80E-06 | 6.00E-07 | 1.36E-07 |
| 6h  | 9.71E-08  | 9.66E-08 | 4.28E-08 | 7.20E-08 |
| 12h | 5.06E-06  | 5.68E-06 | 4.74E-06 | 2.67E-06 |
| 24h | 7.31E-07  | 8.43E-07 | 6.27E-07 | 2.73E-07 |
| 36h | 1.10E-06  | 1.66E-06 | 4.32E-07 | 2.93E-07 |
| 48h | 7.62E-07  | 1.40E-06 | 3.40E-07 | 1.33E-06 |
| 72h | 1.55E-07  | 1.65E-07 | 1.93E-07 | 3.39E-07 |
|     | cgd2_2580 |          |          |          |
| 2h  | 1.85E-04  | 4.94E-04 | 9.33E-05 | 6.91E-07 |
| 6h  | 2.05E-04  | 6.45E-05 | 7.70E-07 | 7.23E-06 |
| 12h | 1.10E-03  | 2.50E-04 | 1.34E-04 | 2.84E-05 |
| 24h | 1.92E-04  | 8.92E-05 | 1.31E-04 | 2.54E-06 |
| 36h | 4.76E-04  | 1.15E-03 | 5.73E-04 | 1.55E-04 |
| 48h | 8.37E-04  | 3.44E-04 | 2.12E-04 | 7.27E-04 |
| 72h | 8.73E-04  | 1.91E-04 | 2.39E-04 | 0.00E+00 |
|     | cgd2_2590 |          |          |          |
| 2h  | 1.36E-07  | 1.50E-07 | 4.07E-08 | 3.69E-09 |
| 6h  | 7.60E-09  | 1.46E-08 | 4.56E-09 | 0.00E+00 |
| 12h | 1.27E-07  | 7.92E-07 | 9.63E-08 | 1.93E-08 |
| 24h | 2.53E-07  | 4.96E-08 | 3.20E-08 | 2.84E-09 |
| 36h | 8.66E-07  | 7.16E-07 | 5.02E-08 | 3.80E-08 |
| 48h | 9.63E-07  | 4.45E-07 | 1.56E-07 | 1.71E-06 |
| 72h | 1.94E-07  | 7.85E-08 | 4.92E-08 | 7.18E-07 |
|     | cgd2_2610 |          |          |          |
| 2h  | 4.44E-07  | 2.13E-06 | 0.00E+00 | 2.14E-08 |
| 6h  | 5.32E-08  | 9.75E-07 | 5.79E-08 | 0.00E+00 |
| 12h | 1.32E-07  | 4.51E-07 | 2.25E-09 | 0.00E+00 |
| 24h | 3.69E-06  | 5.35E-07 | 1.97E-07 | 2.07E-07 |
| 36h | 1.44E-06  | 1.17E-06 | 4.33E-06 | 4.15E-08 |
| 48h | 6.69E-06  | 9.02E-06 | 2.54E-06 | 9.41E-06 |
| 72h | 5.43E-06  | 1.29E-06 | 4.34E-07 | 8.36E-06 |
|     | cgd2_2620 |          |          |          |
| 2h  | 9.21E-08  | 2.20E-07 | 3.43E-08 | 2.18E-09 |
| 6h  | 5.08E-08  | 8.06E-08 | 7.30E-08 | 9.55E-10 |
| 12h | 2.09E-09  | 1.39E-07 | 1.84E-08 | 6.74E-10 |
| 24h | 1.83E-07  | 4.05E-08 | 3.10E-08 | 2.61E-08 |
| 36h | 9.03E-08  | 1.44E-07 | 2.41E-08 | 2.45E-08 |
| 48h | 1.20E-07  | 1.06E-07 | 7.52E-08 | 2.79E-07 |
| 72h | 3.92E-08  | 1.65E-08 | 4.11E-09 | 1.63E-07 |
|     | cgd2_2630 |          |          |          |
| 2h  | 9.57E-04  | 1.65E-03 | 2.10E-03 | 1.47E-04 |
| 6h  | 6.74E-04  | 4.03E-04 | 2.78E-04 | 3.52E-05 |
| 12h | 1.06E-03  | 1.77E-03 | 3.65E-04 | 3.16E-04 |
| 24h | 7.82E-04  | 7.90E-06 | 2.60E-04 | 1.27E-04 |
| 36h | 1.25E-03  | 5.75E-04 | 2.88E-04 | 5.89E-05 |
| 48h | 2.08E-03  | 7.89E-04 | 7.96E-04 | 2.09E-05 |
| 72h | 1.02E-03  | 1.95E-04 | 3.14E-04 | 4.91E-04 |

|     |           |          |          |          |
|-----|-----------|----------|----------|----------|
|     | cgd2_2650 |          |          |          |
| 2h  | 3.89E-07  | 3.05E-07 | 3.81E-07 | 1.00E-07 |
| 6h  | 1.17E-07  | 1.48E-07 | 8.16E-09 | 1.58E-08 |
| 12h | 1.85E-07  | 5.36E-07 | 1.63E-07 | 4.41E-08 |
| 24h | 1.28E-06  | 1.88E-07 | 7.31E-08 | 1.43E-07 |
| 36h | 3.52E-07  | 1.91E-07 | 2.97E-08 | 4.37E-08 |
| 48h | 1.62E-07  | 1.15E-07 | 7.69E-08 | 3.07E-07 |
| 72h | 7.56E-07  | 1.62E-07 | 6.22E-08 | 7.66E-07 |
|     | cgd2_2660 |          |          |          |
| 2h  | 1.81E-05  | 2.21E-05 | 4.01E-06 | 6.13E-07 |
| 6h  | 2.19E-06  | 2.32E-06 | 9.02E-07 | 1.18E-07 |
| 12h | 8.32E-06  | 2.10E-05 | 6.81E-06 | 1.80E-06 |
| 24h | 9.48E-06  | 3.54E-06 | 1.96E-06 | 4.23E-07 |
| 36h | 6.53E-06  | 5.95E-06 | 4.23E-07 | 3.38E-07 |
| 48h | 3.13E-06  | 2.10E-06 | 1.12E-06 | 7.14E-06 |
| 72h | 2.16E-06  | 5.00E-07 | 2.53E-07 | 2.04E-06 |
|     | cgd2_2670 |          |          |          |
| 2h  | 1.13E-06  | 1.32E-06 | 4.08E-07 | 6.18E-08 |
| 6h  | 1.16E-07  | 1.41E-07 | 1.31E-07 | 4.44E-08 |
| 12h | 3.55E-08  | 4.91E-07 | 1.83E-07 | 1.30E-08 |
| 24h | 8.04E-07  | 4.19E-07 | 2.08E-07 | 1.63E-07 |
| 36h | 8.68E-07  | 4.73E-07 | 1.09E-07 | 2.48E-07 |
| 48h | 5.13E-07  | 2.74E-07 | 3.04E-07 | 1.42E-06 |
| 72h | 3.93E-07  | 2.18E-07 | 7.49E-08 | 8.30E-07 |
|     | cgd2_2680 |          |          |          |
| 2h  | 3.05E-06  | 1.84E-06 | 7.74E-07 | 2.38E-08 |
| 6h  | 4.62E-07  | 4.26E-07 | 4.31E-07 | 2.61E-08 |
| 12h | 1.10E-07  | 2.18E-06 | 7.13E-07 | 2.79E-07 |
| 24h | 1.12E-06  | 2.03E-07 | 1.19E-07 | 5.03E-08 |
| 36h | 2.51E-06  | 6.43E-07 | 4.37E-08 | 6.05E-08 |
| 48h | 2.51E-07  | 1.20E-07 | 2.45E-07 | 8.51E-07 |
| 72h | 3.35E-07  | 1.07E-07 | 8.40E-08 | 1.21E-06 |
|     | cgd2_2690 |          |          |          |
| 2h  | 3.39E-04  | 8.54E-04 | 7.77E-04 | 6.99E-04 |
| 6h  | 1.62E-04  | 1.77E-04 | 2.02E-04 | 3.64E-04 |
| 12h | 1.03E-04  | 1.20E-04 | 1.85E-04 | 3.38E-04 |
| 24h | 5.76E-05  | 3.25E-05 | 1.35E-04 | 8.85E-05 |
| 36h | 2.11E-04  | 1.98E-04 | 1.54E-04 | 2.50E-05 |
| 48h | 4.55E-05  | 3.90E-05 | 4.65E-05 | 5.52E-05 |
| 72h | 1.15E-04  | 4.80E-05 | 3.54E-05 | 5.57E-05 |
|     | cgd2_2700 |          |          |          |
| 2h  | 8.71E-09  | 2.03E-08 | 1.62E-08 | 0.00E+00 |
| 6h  | 1.56E-06  | 1.05E-06 | 2.99E-06 | 1.65E-08 |
| 12h | 4.88E-08  | 1.45E-07 | 3.58E-08 | 8.79E-09 |
| 24h | 2.96E-06  | 3.62E-07 | 1.69E-06 | 8.24E-08 |
| 36h | 8.24E-07  | 5.29E-07 | 4.05E-07 | 1.97E-07 |
| 48h | 8.20E-07  | 4.10E-07 | 6.18E-07 | 8.11E-07 |
| 72h | 1.30E-07  | 9.56E-08 | 4.40E-08 | 8.40E-07 |
|     | cgd2_2710 |          |          |          |
| 2h  | 3.02E-04  | 6.05E-04 | 8.78E-05 | 2.22E-01 |
| 6h  | 2.76E-04  | 7.03E-05 | 1.37E-05 | 0.00E+00 |
| 12h | 6.40E-04  | 3.61E-05 | 1.55E-04 | 5.86E-02 |
| 24h | 3.95E-05  | 6.03E-05 | 3.61E-05 | 8.13E-02 |

|     |           |          |          |          |
|-----|-----------|----------|----------|----------|
| 36h | 1.58E-04  | 1.63E-04 | 3.23E-05 | 2.93E-03 |
| 48h | 5.53E-05  | 1.53E-05 | 3.40E-05 | 6.29E-03 |
| 72h | 1.12E-04  | 4.32E-05 | 7.10E-05 | 4.48E-03 |
|     | cgd2_2720 |          |          |          |
| 2h  | 7.81E-07  | 2.03E-07 | 6.65E-08 | 7.75E-09 |
| 6h  | 1.05E-09  | 1.15E-08 | 8.66E-09 | 0.00E+00 |
| 12h | 1.03E-07  | 1.20E-06 | 6.47E-08 | 4.09E-09 |
| 24h | 1.24E-07  | 3.98E-08 | 2.51E-08 | 3.63E-09 |
| 36h | 3.17E-07  | 4.63E-07 | 2.88E-08 | 4.60E-08 |
| 48h | 2.47E-07  | 2.45E-07 | 8.44E-08 | 3.77E-07 |
| 72h | 3.03E-07  | 2.03E-07 | 7.62E-08 | 2.02E-06 |
|     | cgd2_2730 |          |          |          |
| 2h  | 3.45E-06  | 4.56E-06 | 1.19E-06 | 4.36E-05 |
| 6h  | 2.27E-06  | 3.60E-06 | 1.34E-06 | 4.06E-05 |
| 12h | 1.96E-06  | 9.55E-06 | 8.42E-07 | 4.84E-03 |
| 24h | 3.78E-06  | 1.29E-06 | 7.47E-07 | 0.00E+00 |
| 36h | 5.74E-06  | 2.94E-06 | 6.22E-08 | 9.69E-05 |
| 48h | 4.07E-06  | 1.06E-06 | 5.30E-07 | 2.86E-05 |
| 72h | 7.58E-07  | 9.34E-08 | 1.46E-07 | 7.17E-05 |
|     | cgd2_2750 |          |          |          |
| 2h  | 8.93E-06  | 1.05E-05 | 1.52E-05 | 0.00E+00 |
| 6h  | 2.00E-06  | 5.99E-06 | 2.35E-06 | 2.34E-03 |
| 12h | 1.36E-06  | 1.42E-05 | 2.90E-06 | 0.00E+00 |
| 24h | 5.06E-06  | 3.34E-06 | 2.30E-06 | 0.00E+00 |
| 36h | 7.34E-06  | 1.14E-05 | 7.53E-07 | 3.49E-03 |
| 48h | 5.91E-06  | 6.53E-06 | 3.80E-06 | 0.00E+00 |
| 72h | 5.55E-05  | 1.03E-05 | 1.66E-05 | 0.00E+00 |
|     | cgd2_2760 |          |          |          |
| 2h  | 0.00E+00  | 0.00E+00 | 0.00E+00 | 0.00E+00 |
| 6h  | 2.15E-08  | 2.28E-08 | 1.64E-07 | 0.00E+00 |
| 12h | 1.88E-09  | 1.46E-07 | 2.58E-08 | 1.41E-03 |
| 24h | 1.24E-07  | 5.99E-08 | 5.28E-08 | 0.00E+00 |
| 36h | 3.02E-07  | 6.58E-07 | 2.50E-07 | 4.05E-04 |
| 48h | 3.88E-07  | 3.11E-07 | 4.93E-07 | 1.42E-04 |
| 72h | 2.49E-07  | 1.77E-07 | 1.76E-07 | 4.65E-05 |
|     | cgd2_2770 |          |          |          |
| 2h  | 2.94E-09  | 5.11E-08 | 3.35E-08 | 0.00E+00 |
| 6h  | 2.74E-07  | 8.08E-07 | 3.98E-07 | 0.00E+00 |
| 12h | 1.70E-08  | 2.29E-07 | 1.90E-08 | 0.00E+00 |
| 24h | 3.81E-07  | 8.51E-08 | 8.75E-08 | 0.00E+00 |
| 36h | 3.42E-07  | 7.78E-07 | 6.66E-08 | 2.46E-03 |
| 48h | 2.93E-07  | 1.85E-07 | 8.40E-08 | 0.00E+00 |
| 72h | 4.08E-07  | 8.18E-08 | 4.49E-08 | 0.00E+00 |
|     | cgd2_2780 |          |          |          |
| 2h  | 0.00E+00  | 1.05E-06 | 3.69E-06 | 0.00E+00 |
| 6h  | 7.16E-06  | 7.37E-06 | 2.86E-05 | 0.00E+00 |
| 12h | 0.00E+00  | 2.53E-06 | 5.56E-07 | 0.00E+00 |
| 24h | 2.37E-05  | 1.40E-05 | 4.43E-06 | 0.00E+00 |
| 36h | 1.82E-05  | 1.37E-05 | 4.90E-06 | 0.00E+00 |
| 48h | 7.80E-06  | 1.69E-05 | 6.69E-06 | 1.97E-03 |
| 72h | 5.45E-05  | 6.34E-06 | 1.88E-05 | 0.00E+00 |
|     | cgd2_2790 |          |          |          |
| 2h  | 4.60E-07  | 7.77E-08 | 2.24E-08 | 6.28E-06 |

|     |           |          |          |          |
|-----|-----------|----------|----------|----------|
| 6h  | 1.07E-07  | 1.84E-07 | 3.79E-08 | 5.99E-06 |
| 12h | 9.08E-08  | 2.38E-07 | 1.44E-07 | 3.00E-06 |
| 24h | 1.83E-07  | 1.16E-07 | 7.23E-08 | 6.14E-06 |
| 36h | 7.33E-08  | 9.48E-08 | 5.25E-09 | 4.90E-06 |
| 48h | 4.74E-08  | 3.96E-08 | 1.59E-08 | 0.00E+00 |
| 72h | 6.98E-08  | 1.47E-08 | 3.40E-09 | 4.68E-05 |
|     | cgd2_2800 |          |          |          |
| 2h  | 2.05E-07  | 5.36E-08 | 5.01E-08 | 0.00E+00 |
| 6h  | 8.59E-08  | 7.52E-08 | 1.10E-07 | 2.58E-02 |
| 12h | 1.45E-08  | 1.84E-07 | 6.52E-08 | 1.68E-02 |
| 24h | 1.16E-07  | 3.20E-08 | 4.75E-08 | 2.41E-05 |
| 36h | 5.33E-08  | 1.01E-07 | 1.06E-07 | 3.35E-06 |
| 48h | 5.32E-08  | 1.34E-07 | 3.26E-08 | 2.34E-05 |
| 72h | 3.94E-08  | 2.63E-08 | 1.24E-08 | 5.72E-06 |
|     | cgd2_2810 |          |          |          |
| 2h  | 3.36E-05  | 1.20E-04 | 1.90E-05 | 1.06E-03 |
| 6h  | 6.36E-04  | 1.98E-04 | 6.64E-05 | 1.75E-03 |
| 12h | 2.35E-05  | 1.75E-04 | 2.47E-05 | 0.00E+00 |
| 24h | 1.30E-04  | 5.09E-05 | 2.63E-05 | 3.79E-04 |
| 36h | 4.12E-05  | 1.49E-04 | 9.21E-06 | 1.10E-03 |
| 48h | 4.33E-05  | 1.68E-05 | 1.18E-05 | 1.74E-03 |
| 72h | 4.32E-05  | 4.23E-05 | 1.48E-05 | 1.07E-04 |
|     | cgd2_2840 |          |          |          |
| 2h  | 1.67E-08  | 3.12E-08 | 2.00E-09 | 2.39E-04 |
| 6h  | 1.17E-07  | 1.30E-07 | 5.81E-08 | 0.00E+00 |
| 12h | 7.39E-08  | 9.21E-07 | 7.82E-08 | 0.00E+00 |
| 24h | 2.67E-07  | 1.26E-07 | 1.01E-07 | 6.96E-05 |
| 36h | 2.87E-07  | 5.09E-07 | 2.79E-08 | 7.78E-05 |
| 48h | 4.00E-07  | 1.45E-07 | 1.38E-07 | 7.31E-04 |
| 72h | 2.82E-07  | 1.50E-07 | 4.60E-08 | 2.12E-05 |
|     | cgd2_2860 |          |          |          |
| 2h  | 1.90E-08  | 5.75E-08 | 1.93E-08 | 0.00E+00 |
| 6h  | 3.04E-09  | 1.20E-09 | 1.23E-08 | 4.71E-06 |
| 12h | 3.74E-08  | 1.43E-07 | 1.12E-07 | 1.23E-03 |
| 24h | 3.63E-08  | 2.84E-08 | 1.69E-08 | 6.97E-05 |
| 36h | 5.62E-08  | 6.68E-08 | 5.42E-08 | 1.33E-05 |
| 48h | 5.59E-08  | 3.21E-08 | 1.21E-07 | 1.36E-05 |
| 72h | 5.35E-08  | 7.92E-08 | 1.91E-08 | 3.14E-05 |
|     | cgd2_2880 |          |          |          |
| 2h  | 1.31E-05  | 4.00E-06 | 9.94E-07 | 0.00E+00 |
| 6h  | 2.64E-06  | 9.36E-07 | 3.41E-06 | 0.00E+00 |
| 12h | 2.52E-07  | 1.19E-06 | 1.39E-07 | 0.00E+00 |
| 24h | 5.71E-06  | 3.99E-06 | 3.47E-06 | 0.00E+00 |
| 36h | 5.65E-06  | 8.49E-06 | 1.17E-05 | 2.10E-03 |
| 48h | 9.03E-06  | 4.85E-06 | 3.27E-05 | 3.91E-03 |
| 72h | 0.00E+00  | 1.50E-05 | 3.08E-05 | 0.00E+00 |
|     | cgd2_2890 |          |          |          |
| 2h  | 1.69E-08  | 1.74E-08 | 6.85E-09 | 2.72E-05 |
| 6h  | 4.97E-07  | 1.26E-06 | 1.76E-06 | 3.17E-02 |
| 12h | 1.81E-08  | 3.82E-07 | 8.33E-08 | 2.90E-04 |
| 24h | 1.23E-06  | 1.82E-07 | 4.00E-07 | 2.14E-04 |
| 36h | 5.82E-07  | 7.83E-07 | 6.24E-07 | 2.26E-04 |
| 48h | 2.41E-06  | 1.81E-07 | 7.95E-07 | 9.31E-05 |

|     |           |          |          |          |
|-----|-----------|----------|----------|----------|
| 72h | 4.16E-07  | 1.42E-07 | 5.66E-07 | 1.28E-03 |
|     | cgd5_1910 |          |          |          |
| 2h  | 2.45E-07  | 1.20E-07 | 6.36E-08 | 8.19E-08 |
| 6h  | 4.58E-09  | 0.00E+00 | 7.53E-10 | 5.38E-08 |
| 12h | 2.61E-07  | 6.03E-07 | 2.82E-07 | 5.99E-07 |
| 24h | 1.34E-07  | 2.46E-07 | 2.29E-07 | 1.75E-07 |
| 36h | 1.41E-06  | 2.34E-07 | 3.20E-07 | 6.07E-07 |
| 48h | 3.39E-07  | 2.81E-07 | 2.09E-07 | 1.12E-07 |
| 72h | 2.28E-07  | 9.91E-08 | 1.23E-07 | 1.27E-07 |
|     | cgd5_1920 |          |          |          |
| 2h  | 4.98E-08  | 0.00E+00 | 5.78E-09 | 9.27E-09 |
| 6h  | 6.09E-08  | 4.96E-08 | 3.26E-08 | 4.73E-08 |
| 12h | 3.09E-07  | 2.99E-06 | 9.82E-07 | 3.46E-07 |
| 24h | 2.50E-07  | 3.62E-07 | 3.50E-07 | 6.31E-07 |
| 36h | 3.10E-06  | 1.36E-06 | 5.61E-07 | 7.49E-07 |
| 48h | 4.65E-07  | 1.50E-06 | 6.48E-07 | 1.06E-07 |
| 72h | 6.72E-07  | 1.19E-06 | 6.09E-07 | 1.21E-07 |
|     | cgd5_1820 |          |          |          |
| 2h  | 5.73E-06  | 2.04E-06 | 3.18E-07 | 5.50E-07 |
| 6h  | 3.86E-04  | 5.25E-05 | 5.37E-05 | 1.69E-04 |
| 12h | 2.01E-05  | 6.84E-06 | 2.78E-06 | 1.57E-05 |
| 24h | 1.56E-04  | 2.75E-05 | 2.19E-05 | 1.36E-04 |
| 36h | 8.19E-05  | 3.29E-05 | 2.69E-05 | 6.06E-05 |
| 48h | 9.34E-05  | 2.64E-05 | 1.39E-05 | 3.02E-05 |
| 72h | 6.01E-06  | 5.92E-06 | 2.66E-06 | 3.29E-06 |
|     | cgd5_1850 |          |          |          |
| 2h  | 1.51E-04  | 3.54E-05 | 3.65E-05 | 2.50E-04 |
| 6h  | 2.20E-04  | 4.41E-05 | 2.14E-05 | 1.10E-04 |
| 12h | 9.40E-05  | 5.12E-05 | 4.82E-06 | 1.13E-04 |
| 24h | 1.44E-04  | 6.64E-05 | 4.65E-05 | 1.52E-04 |
| 36h | 1.71E-04  | 4.87E-05 | 3.72E-05 | 1.06E-04 |
| 48h | 3.16E-04  | 2.25E-05 | 1.13E-05 | 1.88E-05 |
| 72h | 4.21E-05  | 4.53E-06 | 4.72E-06 | 6.37E-06 |
|     | cgd5_1860 |          |          |          |
| 2h  | 1.98E-07  | 1.05E-06 | 8.04E-07 | 1.08E-06 |
| 6h  | 4.49E-08  | 3.86E-07 | 1.02E-07 | 2.08E-07 |
| 12h | 4.22E-07  | 4.20E-07 | 5.39E-08 | 8.23E-07 |
| 24h | 2.10E-07  | 8.81E-07 | 9.27E-07 | 4.64E-07 |
| 36h | 1.76E-07  | 4.93E-07 | 3.86E-07 | 3.47E-07 |
| 48h | 5.22E-07  | 1.76E-07 | 1.17E-07 | 8.84E-08 |
| 72h | 1.08E-08  | 1.18E-07 | 4.46E-08 | 3.12E-08 |
|     | cgd5_1870 |          |          |          |
| 2h  | 1.21E-08  | 6.64E-09 | 2.56E-09 | 2.79E-08 |
| 6h  | 1.55E-07  | 2.18E-07 | 1.20E-07 | 1.80E-07 |
| 12h | 2.81E-08  | 3.59E-08 | 1.01E-08 | 4.95E-08 |
| 24h | 3.89E-07  | 5.82E-08 | 1.56E-07 | 4.25E-07 |
| 36h | 2.13E-07  | 5.27E-07 | 1.88E-07 | 2.85E-07 |
| 48h | 2.37E-07  | 1.51E-07 | 9.06E-08 | 1.63E-07 |
| 72h | 1.60E-08  | 7.82E-08 | 2.25E-08 | 3.43E-08 |
|     | cgd5_1880 |          |          |          |
| 2h  | 5.31E-07  | 2.64E-06 | 1.66E-06 | 3.10E-06 |
| 6h  | 5.82E-05  | 6.77E-05 | 2.17E-05 | 4.82E-05 |
| 12h | 4.87E-06  | 1.62E-06 | 1.47E-06 | 8.27E-06 |

|     |           |          |          |          |
|-----|-----------|----------|----------|----------|
| 24h | 3.48E-05  | 4.56E-06 | 8.45E-06 | 5.42E-05 |
| 36h | 1.90E-05  | 9.84E-06 | 1.38E-05 | 9.70E-06 |
| 48h | 1.08E-05  | 6.47E-06 | 7.56E-06 | 1.26E-05 |
| 72h | 4.89E-07  | 2.30E-06 | 3.72E-07 | 4.51E-07 |
|     | cgd5_1890 |          |          |          |
| 2h  | 2.84E-04  | 8.17E-05 | 6.76E-05 | 4.00E-04 |
| 6h  | 7.90E-04  | 1.22E-04 | 9.49E-05 | 1.28E-03 |
| 12h | 2.72E-04  | 1.71E-05 | 3.61E-06 | 2.30E-04 |
| 24h | 9.29E-04  | 4.58E-05 | 7.78E-05 | 1.16E-03 |
| 36h | 8.20E-04  | 9.35E-05 | 1.08E-04 | 3.24E-04 |
| 48h | 6.10E-04  | 4.95E-05 | 7.20E-05 | 1.38E-04 |
| 72h | 6.63E-05  | 2.84E-05 | 1.10E-05 | 2.38E-05 |
|     | cgd5_1900 |          |          |          |
| 2h  | 5.63E-07  | 1.30E-06 | 3.54E-06 | 2.28E-06 |
| 6h  | 8.03E-07  | 8.91E-07 | 1.02E-06 | 9.97E-07 |
| 12h | 7.41E-07  | 3.31E-06 | 1.21E-06 | 2.05E-06 |
| 24h | 1.17E-06  | 1.12E-06 | 2.95E-06 | 2.03E-06 |
| 36h | 1.72E-06  | 6.73E-07 | 5.66E-07 | 5.70E-07 |
| 48h | 1.50E-06  | 7.04E-07 | 4.24E-07 | 3.45E-07 |
| 72h | 3.45E-07  | 2.06E-07 | 1.77E-07 | 7.20E-08 |
|     | cgd5_1780 |          |          |          |
| 2h  | 5.29E-07  | 9.94E-07 | 4.17E-07 | 1.06E-06 |
| 6h  | 4.20E-07  | 2.86E-07 | 3.73E-07 | 7.98E-07 |
| 12h | 3.40E-06  | 1.06E-05 | 2.32E-06 | 4.02E-06 |
| 24h | 9.34E-07  | 5.43E-06 | 3.64E-06 | 2.69E-06 |
| 36h | 3.32E-06  | 1.55E-06 | 1.61E-06 | 4.21E-06 |
| 48h | 1.21E-06  | 2.60E-06 | 4.02E-07 | 3.30E-07 |
| 72h | 1.07E-07  | 3.09E-07 | 2.00E-07 | 1.73E-07 |
|     | cgd5_1800 |          |          |          |
| 2h  | 7.19E-06  | 2.05E-05 | 1.24E-05 | 4.41E-05 |
| 6h  | 6.56E-05  | 1.53E-05 | 1.94E-05 | 4.78E-05 |
| 12h | 1.11E-04  | 3.54E-05 | 1.50E-05 | 1.07E-04 |
| 24h | 2.76E-04  | 5.24E-05 | 7.47E-05 | 3.19E-04 |
| 36h | 2.34E-04  | 2.41E-05 | 3.23E-05 | 1.28E-04 |
| 48h | 2.72E-04  | 6.22E-04 | 4.49E-05 | 1.28E-04 |
| 72h | 2.11E-04  | 2.85E-05 | 2.59E-05 | 6.05E-05 |
|     | cgd5_1810 |          |          |          |
| 2h  | 9.11E-08  | 1.75E-07 | 1.01E-07 | 2.88E-07 |
| 6h  | 7.21E-07  | 9.60E-07 | 5.21E-07 | 4.59E-07 |
| 12h | 1.04E-07  | 1.32E-07 | 9.53E-08 | 4.16E-07 |
| 24h | 1.09E-06  | 9.80E-07 | 5.73E-07 | 1.09E-06 |
| 36h | 9.04E-07  | 4.50E-07 | 1.39E-06 | 8.61E-07 |
| 48h | 6.49E-06  | 8.80E-06 | 2.40E-06 | 1.18E-06 |
| 72h | 4.32E-07  | 8.34E-07 | 3.50E-07 | 1.93E-07 |
|     | cgd1_1920 |          |          |          |
| 2h  | 8.96E-09  | 0.00E+00 | 0.00E+00 | 2.63E-08 |
| 6h  | 0.00E+00  | 3.57E-09 | 4.45E-08 | 8.68E-09 |
| 12h | 4.80E-07  | 2.80E-07 | 1.47E-07 | 1.65E-07 |
| 24h | 1.60E-07  | 7.87E-08 | 1.41E-07 | 5.91E-08 |
| 36h | 1.02E-06  | 5.59E-07 | 1.66E-06 | 7.45E-07 |
| 48h | 2.48E-06  | 1.34E-06 | 4.09E-06 | 1.49E-06 |
| 72h | 1.20E-06  | 2.71E-07 | 4.10E-06 | 7.59E-07 |
|     | cgd1_1930 |          |          |          |

|     |           |          |          |          |
|-----|-----------|----------|----------|----------|
| 2h  | 6.14E-09  | 0.00E+00 | 8.96E-09 | 5.64E-09 |
| 6h  | 1.77E-07  | 5.23E-08 | 4.47E-07 | 1.46E-07 |
| 12h | 3.67E-08  | 1.12E-08 | 1.17E-07 | 5.18E-08 |
| 24h | 1.38E-07  | 1.80E-08 | 2.20E-07 | 1.31E-07 |
| 36h | 1.27E-07  | 3.93E-08 | 3.88E-07 | 1.00E-07 |
| 48h | 1.54E-07  | 1.55E-07 | 7.02E-07 | 1.51E-07 |
| 72h | 4.76E-08  | 3.03E-08 | 5.80E-07 | 1.86E-07 |
|     | cgd1_1940 |          |          |          |
| 2h  | 1.13E-06  | 1.06E-07 | 2.10E-06 | 1.71E-06 |
| 6h  | 2.59E-05  | 2.72E-05 | 5.33E-05 | 2.55E-05 |
| 12h | 7.53E-06  | 5.74E-06 | 2.02E-05 | 7.76E-06 |
| 24h | 2.08E-05  | 1.14E-05 | 3.87E-05 | 2.87E-05 |
| 36h | 3.27E-05  | 2.59E-05 | 5.32E-05 | 2.63E-05 |
| 48h | 6.48E-05  | 4.59E-05 | 9.81E-05 | 4.28E-05 |
| 72h | 1.05E-05  | 2.46E-06 | 4.74E-05 | 2.41E-05 |
|     | cgd1_1950 |          |          |          |
| 2h  | 2.69E-06  | 3.17E-06 | 3.09E-06 | 5.35E-07 |
| 6h  | 3.82E-06  | 2.69E-06 | 6.11E-06 | 9.67E-07 |
| 12h | 1.53E-06  | 1.65E-06 | 5.34E-07 | 9.29E-07 |
| 24h | 1.36E-06  | 8.74E-07 | 1.36E-06 | 1.03E-06 |
| 36h | 3.05E-06  | 1.69E-06 | 2.09E-06 | 9.08E-07 |
| 48h | 2.07E-06  | 3.94E-06 | 4.03E-06 | 6.89E-07 |
| 72h | 7.14E-07  | 9.94E-07 | 1.63E-06 | 4.52E-07 |
|     | cgd1_1960 |          |          |          |
| 2h  | 7.54E-08  | 7.90E-08 | 2.26E-07 | 9.23E-08 |
| 6h  | 1.96E-07  | 9.30E-08 | 2.81E-07 | 3.39E-07 |
| 12h | 3.35E-08  | 8.54E-09 | 4.41E-08 | 3.18E-08 |
| 24h | 3.94E-08  | 1.45E-08 | 7.64E-08 | 1.04E-07 |
| 36h | 6.71E-08  | 1.79E-08 | 8.38E-08 | 5.25E-08 |
| 48h | 1.44E-07  | 2.69E-07 | 2.68E-07 | 1.08E-07 |
| 72h | 2.36E-08  | 1.37E-08 | 1.06E-07 | 2.99E-08 |
|     | cgd1_1970 |          |          |          |
| 2h  | 1.10E-08  | 5.70E-08 | 1.35E-08 | 9.15E-10 |
| 6h  | 4.32E-08  | 7.25E-09 | 2.23E-07 | 8.86E-09 |
| 12h | 1.26E-06  | 6.17E-07 | 1.26E-06 | 1.47E-07 |
| 24h | 1.12E-06  | 2.02E-07 | 2.81E-07 | 2.94E-07 |
| 36h | 2.16E-06  | 9.84E-07 | 2.87E-06 | 9.47E-07 |
| 48h | 1.50E-06  | 2.41E-06 | 3.47E-06 | 4.89E-07 |
| 72h | 3.97E-07  | 1.18E-07 | 7.81E-07 | 1.90E-07 |
|     | cgd1_1990 |          |          |          |
| 2h  | 4.47E-04  | 2.09E-04 | 5.79E-04 | 2.31E-04 |
| 6h  | 2.94E-04  | 2.85E-04 | 4.16E-04 | 3.85E-04 |
| 12h | 6.82E-05  | 3.21E-05 | 2.83E-04 | 1.18E-04 |
| 24h | 1.21E-03  | 3.18E-05 | 2.48E-04 | 1.64E-04 |
| 36h | 6.01E-05  | 5.34E-05 | 1.59E-04 | 8.27E-05 |
| 48h | 9.60E-05  | 7.55E-05 | 3.20E-04 | 1.48E-04 |
| 72h | 1.60E-05  | 4.55E-06 | 5.50E-05 | 2.26E-05 |
|     | cgd1_2000 |          |          |          |
| 2h  | 1.40E-03  | 1.33E-03 | 1.54E-03 | 2.02E-03 |
| 6h  | 1.27E-04  | 2.15E-04 | 5.36E-04 | 6.19E-04 |
| 12h | 1.40E-03  | 9.41E-04 | 3.98E-03 | 1.25E-03 |
| 24h | 2.82E-04  | 4.57E-05 | 6.82E-04 | 3.01E-04 |
| 36h | 2.06E-04  | 1.54E-04 | 4.07E-04 | 3.17E-04 |



|     |           |          |          |          |
|-----|-----------|----------|----------|----------|
| 48h | 4.35E-04  | 2.60E-04 | 5.97E-04 | 1.51E-04 |
| 72h | 1.16E-04  | 6.09E-05 | 4.10E-04 | 3.81E-04 |
|     | cgd1_2020 |          |          |          |
| 2h  | 0.00E+00  | 0.00E+00 | 0.00E+00 | 6.75E-10 |
| 6h  | 1.39E-09  | 4.66E-10 | 4.74E-09 | 7.48E-10 |
| 12h | 7.01E-11  | 5.45E-11 | 1.30E-10 | 1.92E-10 |
| 24h | 8.91E-10  | 3.49E-10 | 1.57E-09 | 1.83E-09 |
| 36h | 2.99E-09  | 3.35E-09 | 4.03E-09 | 4.51E-09 |
| 48h | 4.68E-08  | 4.90E-08 | 1.35E-07 | 4.98E-08 |
| 72h | 5.59E-08  | 1.78E-08 | 1.36E-07 | 6.10E-08 |
|     | cgd1_2030 |          |          |          |
| 2h  | 1.85E-05  | 5.23E-05 | 3.13E-06 | 3.28E-06 |
| 6h  | 9.72E-06  | 6.09E-06 | 2.83E-06 | 2.69E-07 |
| 12h | 9.55E-06  | 1.49E-05 | 4.66E-06 | 8.57E-06 |
| 24h | 1.50E-05  | 3.39E-06 | 3.29E-06 | 1.92E-06 |
| 36h | 1.62E-05  | 3.46E-05 | 1.39E-05 | 1.20E-05 |
| 48h | 7.47E-05  | 2.75E-05 | 1.99E-05 | 1.01E-05 |
| 72h | 1.54E-05  | 6.18E-06 | 1.53E-05 | 5.97E-06 |
|     | cgd1_2060 |          |          |          |
| 2h  | 2.14E-06  | 0.00E+00 | 0.00E+00 | 0.00E+00 |
| 6h  | 8.58E-08  | 7.09E-08 | 1.35E-06 | 2.21E-07 |
| 12h | 4.92E-08  | 0.00E+00 | 0.00E+00 | 1.31E-08 |
| 24h | 1.28E-06  | 2.81E-07 | 7.64E-07 | 1.02E-06 |
| 36h | 1.28E-06  | 9.50E-07 | 9.38E-07 | 5.84E-07 |
| 48h | 1.30E-05  | 6.21E-06 | 1.20E-05 | 3.17E-06 |
| 72h | 1.20E-05  | 1.26E-06 | 1.04E-05 | 1.28E-05 |
|     | cgd1_2070 |          |          |          |
| 2h  | 3.74E-07  | 3.20E-07 | 4.68E-07 | 8.91E-08 |
| 6h  | 3.47E-07  | 9.44E-08 | 4.88E-08 | 3.35E-08 |
| 12h | 3.93E-08  | 1.44E-08 | 2.40E-08 | 1.10E-08 |
| 24h | 5.44E-08  | 9.58E-09 | 1.23E-07 | 5.00E-08 |
| 36h | 3.93E-07  | 1.77E-07 | 4.51E-07 | 1.17E-07 |
| 48h | 5.66E-07  | 2.47E-07 | 3.32E-07 | 1.61E-07 |
| 72h | 1.41E-07  | 1.88E-08 | 3.75E-07 | 1.55E-07 |
|     | cgd1_2080 |          |          |          |
| 2h  | 1.38E-03  | 2.36E-05 | 0.00E+00 | 5.10E-03 |
| 6h  | 3.41E-03  | 1.89E-04 | 5.08E-05 | 4.18E-03 |
| 12h | 7.98E-04  | 1.75E-04 | 4.15E-05 | 3.35E-03 |
| 24h | 1.24E-03  | 4.15E-04 | 8.90E-05 | 2.62E-03 |
| 36h | 5.06E-04  | 4.24E-04 | 1.37E-04 | 1.46E-03 |
| 48h | 4.25E-04  | 1.18E-04 | 3.57E-05 | 9.84E-04 |
| 72h | 8.84E-05  | 3.07E-05 | 1.84E-05 | 2.80E-04 |
|     | cgd1_2090 |          |          |          |
| 2h  | 1.22E-02  | 5.31E-05 | 0.00E+00 | 6.91E-03 |
| 6h  | 6.26E-03  | 2.88E-04 | 1.23E-04 | 2.34E-02 |
| 12h | 5.21E-04  | 2.99E-04 | 2.98E-05 | 8.48E-03 |
| 24h | 3.76E-03  | 1.57E-03 | 2.44E-04 | 1.01E-02 |
| 36h | 7.62E-04  | 7.04E-04 | 1.33E-04 | 2.92E-03 |
| 48h | 1.04E-03  | 2.04E-04 | 1.72E-05 | 2.93E-03 |
| 72h | 2.39E-04  | 1.15E-05 | 3.22E-05 | 1.19E-03 |
|     | cgd1_2100 |          |          |          |
| 2h  | 1.01E-04  | 9.14E-05 | 3.01E-05 | 3.73E-04 |
| 6h  | 1.27E-04  | 1.80E-04 | 4.75E-05 | 3.75E-04 |

|     |           |          |          |          |
|-----|-----------|----------|----------|----------|
| 12h | 9.36E-04  | 9.00E-05 | 3.45E-05 | 1.49E-04 |
| 24h | 3.75E-05  | 8.94E-04 | 5.40E-05 | 6.73E-04 |
| 36h | 1.07E-04  | 3.16E-04 | 2.81E-04 | 2.60E-04 |
| 48h | 5.84E-05  | 3.25E-04 | 8.43E-05 | 2.52E-04 |
| 72h | 2.39E-06  | 5.24E-05 | 4.78E-05 | 4.00E-05 |
|     | cgd1_2110 |          |          |          |
| 2h  | 3.35E-04  | 3.16E-05 | 3.70E-05 | 9.21E-05 |
| 6h  | 7.01E-03  | 1.94E-04 | 7.87E-05 | 2.91E-03 |
| 12h | 2.12E-05  | 7.54E-05 | 1.62E-04 | 5.96E-04 |
| 24h | 9.06E-05  | 1.83E-03 | 2.99E-04 | 1.94E-03 |
| 36h | 5.01E-04  | 4.61E-04 | 2.74E-04 | 9.96E-04 |
| 48h | 1.30E-04  | 7.87E-04 | 4.08E-05 | 4.43E-04 |
| 72h | 6.65E-05  | 5.60E-05 | 3.27E-05 | 8.96E-05 |
|     | cgd1_2120 |          |          |          |
| 2h  | 5.52E-06  | 3.67E-05 | 5.44E-06 | 5.94E-07 |
| 6h  | 2.99E-05  | 2.92E-04 | 1.65E-04 | 8.67E-05 |
| 12h | 3.23E-06  | 1.36E-04 | 7.42E-06 | 6.37E-06 |
| 24h | 5.93E-06  | 8.54E-04 | 3.67E-05 | 9.91E-05 |
| 36h | 3.31E-05  | 6.23E-04 | 3.98E-04 | 4.90E-05 |
| 48h | 1.35E-05  | 8.43E-04 | 1.74E-04 | 2.82E-05 |
| 72h | 3.49E-06  | 1.72E-05 | 1.99E-05 | 2.48E-06 |
|     | cgd1_2130 |          |          |          |
| 2h  | 2.11E-06  | 3.46E-07 | 7.20E-07 | 1.22E-07 |
| 6h  | 1.60E-05  | 6.18E-05 | 1.65E-05 | 1.47E-05 |
| 12h | 4.84E-07  | 1.03E-06 | 4.27E-06 | 2.58E-06 |
| 24h | 1.87E-06  | 4.41E-05 | 7.13E-06 | 1.37E-05 |
| 36h | 3.38E-06  | 5.11E-05 | 5.94E-06 | 3.47E-06 |
| 48h | 1.81E-06  | 7.86E-06 | 2.38E-06 | 2.79E-06 |
| 72h | 4.31E-07  | 1.62E-06 | 1.28E-06 | 1.96E-07 |
|     | cgd1_2140 |          |          |          |
| 2h  | 1.21E-05  | 2.33E-05 | 4.78E-05 | 1.36E-06 |
| 6h  | 7.87E-07  | 2.71E-04 | 2.99E-05 | 1.47E-05 |
| 12h | 2.52E-06  | 5.27E-05 | 5.79E-05 | 6.03E-06 |
| 24h | 4.07E-06  | 2.54E-04 | 5.69E-05 | 8.80E-06 |
| 36h | 7.40E-06  | 3.89E-04 | 2.16E-04 | 1.21E-05 |
| 48h | 1.44E-05  | 8.41E-04 | 1.20E-04 | 4.15E-05 |
| 72h | 4.58E-06  | 2.80E-05 | 2.01E-05 | 2.43E-06 |
|     | cgd1_2150 |          |          |          |
| 2h  | 1.54E-05  | 4.15E-05 | 5.36E-05 | 3.66E-06 |
| 6h  | 1.56E-05  | 3.40E-05 | 6.63E-06 | 3.05E-05 |
| 12h | 4.30E-06  | 3.61E-05 | 8.85E-05 | 1.39E-05 |
| 24h | 6.60E-06  | 1.02E-04 | 6.15E-05 | 1.98E-05 |
| 36h | 3.83E-06  | 1.69E-04 | 6.73E-05 | 8.69E-06 |
| 48h | 1.05E-05  | 1.46E-04 | 1.06E-04 | 2.47E-05 |
| 72h | 4.52E-06  | 3.53E-05 | 1.98E-05 | 8.71E-06 |
|     | cgd1_2160 |          |          |          |
| 2h  | 3.03E-06  | 6.62E-06 | 0.00E+00 | 4.50E-07 |
| 6h  | 5.50E-07  | 2.07E-06 | 1.89E-07 | 2.16E-06 |
| 12h | 2.64E-07  | 9.31E-06 | 0.00E+00 | 3.37E-06 |
| 24h | 1.41E-06  | 3.49E-06 | 3.94E-06 | 2.53E-06 |
| 36h | 1.78E-07  | 2.44E-06 | 2.26E-06 | 2.88E-07 |
| 48h | 1.33E-06  | 1.04E-05 | 8.11E-07 | 2.78E-06 |
| 72h | 6.10E-07  | 9.45E-07 | 1.07E-05 | 1.18E-06 |

|     |           |          |          |          |
|-----|-----------|----------|----------|----------|
|     | cgd1_2180 |          |          |          |
| 2h  | 1.75E-03  | 1.67E-04 | 1.01E-04 | 3.26E-03 |
| 6h  | 1.79E-04  | 3.25E-04 | 4.24E-05 | 8.83E-04 |
| 12h | 1.85E-05  | 1.19E-04 | 2.59E-04 | 6.88E-04 |
| 24h | 8.85E-05  | 1.40E-03 | 8.27E-05 | 1.55E-03 |
| 36h | 1.30E-04  | 1.48E-04 | 9.93E-05 | 8.77E-04 |
| 48h | 8.43E-05  | 3.16E-04 | 6.56E-05 | 2.67E-03 |
| 72h | 1.86E-04  | 2.69E-05 | 0.00E+00 | 1.24E-03 |
|     | cgd1_2190 |          |          |          |
| 2h  | 5.39E-06  | 4.56E-07 | 2.36E-05 | 7.06E-05 |
| 6h  | 5.67E-07  | 2.82E-06 | 2.58E-05 | 7.33E-05 |
| 12h | 3.59E-08  | 0.00E+00 | 3.02E-05 | 3.52E-05 |
| 24h | 9.48E-07  | 4.16E-07 | 2.18E-05 | 2.47E-05 |
| 36h | 8.69E-07  | 6.89E-07 | 6.17E-05 | 6.03E-05 |
| 48h | 1.78E-06  | 4.31E-07 | 2.97E-05 | 2.23E-05 |
| 72h | 2.03E-07  | 5.65E-07 | 6.82E-06 | 5.44E-06 |
|     | cgd1_2200 |          |          |          |
| 2h  | 2.40E-08  | 7.53E-09 | 1.24E-06 | 1.61E-07 |
| 6h  | 3.52E-09  | 7.31E-08 | 1.16E-07 | 0.00E+00 |
| 12h | 1.67E-09  | 5.26E-09 | 1.51E-07 | 7.99E-08 |
| 24h | 7.75E-07  | 3.01E-07 | 8.50E-08 | 2.90E-06 |
| 36h | 5.33E-07  | 2.20E-07 | 1.48E-07 | 5.95E-06 |
| 48h | 3.49E-06  | 1.12E-06 | 6.81E-07 | 1.30E-05 |
| 72h | 3.99E-07  | 1.54E-07 | 1.50E-07 | 1.59E-06 |
|     | cgd1_2210 |          |          |          |
| 2h  | 2.30E-07  | 7.33E-08 | 4.46E-07 | 2.68E-07 |
| 6h  | 2.88E-06  | 7.49E-07 | 5.49E-07 | 7.59E-07 |
| 12h | 6.92E-08  | 4.49E-08 | 4.92E-08 | 4.39E-08 |
| 24h | 3.59E-07  | 2.41E-07 | 3.79E-07 | 2.04E-07 |
| 36h | 2.26E-07  | 3.65E-07 | 1.21E-07 | 1.98E-07 |
| 48h | 6.64E-07  | 9.20E-07 | 1.01E-06 | 7.57E-07 |
| 72h | 5.09E-07  | 1.96E-07 | 2.95E-07 | 2.01E-07 |
|     | cgd1_2230 |          |          |          |
| 2h  | 1.31E-05  | 1.81E-06 | 1.93E-06 | 1.46E-05 |
| 6h  | 1.88E-05  | 3.13E-05 | 5.53E-05 | 3.77E-05 |
| 12h | 7.29E-06  | 3.60E-06 | 6.54E-06 | 3.96E-06 |
| 24h | 3.78E-05  | 2.42E-05 | 5.58E-05 | 2.27E-05 |
| 36h | 2.55E-05  | 1.47E-05 | 2.65E-05 | 1.21E-05 |
| 48h | 1.82E-05  | 2.14E-05 | 5.34E-05 | 6.58E-06 |
| 72h | 2.46E-05  | 1.71E-05 | 2.80E-05 | 1.10E-05 |
|     | cgd1_2240 |          |          |          |
| 2h  | 2.32E-09  | 1.39E-09 | 0.00E+00 | 4.17E-09 |
| 6h  | 3.05E-08  | 6.78E-08 | 4.84E-08 | 5.22E-08 |
| 12h | 1.60E-09  | 3.57E-09 | 4.05E-10 | 3.66E-10 |
| 24h | 4.80E-08  | 1.91E-08 | 6.00E-08 | 6.15E-08 |
| 36h | 6.62E-08  | 4.52E-08 | 5.13E-08 | 3.63E-08 |
| 48h | 1.07E-07  | 9.99E-08 | 2.60E-07 | 4.37E-08 |
| 72h | 7.49E-08  | 2.67E-08 | 1.30E-07 | 4.63E-08 |
|     | cgd1_2270 |          |          |          |
| 2h  | 7.19E-06  | 2.74E-06 | 1.51E-06 | 2.88E-07 |
| 6h  | 4.99E-05  | 6.11E-05 | 2.28E-05 | 1.09E-06 |
| 12h | 1.96E-05  | 1.23E-05 | 5.56E-06 | 1.68E-06 |
| 24h | 1.62E-05  | 8.69E-06 | 5.55E-06 | 9.68E-07 |

|     |           |          |          |          |
|-----|-----------|----------|----------|----------|
| 36h | 1.12E-05  | 1.53E-05 | 3.99E-06 | 5.44E-07 |
| 48h | 2.96E-06  | 5.85E-06 | 4.01E-06 | 2.99E-07 |
| 72h | 7.11E-07  | 6.86E-07 | 2.64E-07 | 2.30E-07 |
|     | cgd1_2310 |          |          |          |
| 2h  | 2.87E-07  | 5.86E-07 | 3.08E-07 | 5.25E-07 |
| 6h  | 2.15E-07  | 2.24E-07 | 2.31E-07 | 4.67E-07 |
| 12h | 7.21E-07  | 2.27E-06 | 2.44E-06 | 7.02E-07 |
| 24h | 4.61E-07  | 2.53E-07 | 5.48E-07 | 5.65E-07 |
| 36h | 5.54E-07  | 3.45E-07 | 3.42E-07 | 2.76E-07 |
| 48h | 4.97E-07  | 2.19E-07 | 6.55E-07 | 1.66E-07 |
| 72h | 2.69E-07  | 9.77E-08 | 2.24E-07 | 8.44E-08 |
|     | cgd1_2380 |          |          |          |
| 2h  | 5.82E-07  | 8.66E-08 | 1.47E-07 | 1.36E-07 |
| 6h  | 2.68E-07  | 1.15E-07 | 2.56E-07 | 3.56E-07 |
| 12h | 4.20E-08  | 8.03E-08 | 2.02E-07 | 4.10E-08 |
| 24h | 2.10E-07  | 5.37E-08 | 1.83E-07 | 2.48E-07 |
| 36h | 3.35E-07  | 8.04E-08 | 2.53E-07 | 1.26E-07 |
| 48h | 2.04E-07  | 1.81E-07 | 1.04E-06 | 2.42E-07 |
| 72h | 2.80E-07  | 7.78E-08 | 2.05E-07 | 1.74E-07 |
|     | cgd1_2390 |          |          |          |
| 2h  | 4.84E-07  | 8.19E-04 | 2.87E-07 | 2.73E-07 |
| 6h  | 1.79E-07  | 1.67E-07 | 1.82E-07 | 2.24E-07 |
| 12h | 1.74E-07  | 4.02E-07 | 2.68E-07 | 1.05E-07 |
| 24h | 2.72E-07  | 1.49E-07 | 1.18E-07 | 1.11E-07 |
| 36h | 3.66E-07  | 1.68E-07 | 2.26E-07 | 7.56E-08 |
| 48h | 2.48E-07  | 1.73E-07 | 3.29E-07 | 8.25E-08 |
| 72h | 1.23E-07  | 8.15E-08 | 1.08E-07 | 9.95E-08 |
|     | cgd1_2410 |          |          |          |
| 2h  | 4.51E-07  | 2.25E-07 | 1.18E-07 | 5.03E-08 |
| 6h  | 2.56E-07  | 1.18E-07 | 2.79E-07 | 4.12E-07 |
| 12h | 3.57E-08  | 3.31E-08 | 3.48E-08 | 3.73E-08 |
| 24h | 1.85E-07  | 1.75E-08 | 7.70E-08 | 1.93E-07 |
| 36h | 2.02E-07  | 1.12E-07 | 2.41E-07 | 9.89E-08 |
| 48h | 1.81E-07  | 1.24E-07 | 2.73E-07 | 9.27E-08 |
| 72h | 1.26E-07  | 7.55E-08 | 7.86E-08 | 8.15E-08 |
|     | cgd1_2440 |          |          |          |
| 2h  | 1.24E-06  | 1.03E-06 | 1.90E-06 | 4.16E-06 |
| 6h  | 1.79E-07  | 1.33E-07 | 4.08E-07 | 4.92E-07 |
| 12h | 3.65E-07  | 1.18E-07 | 1.22E-06 | 5.25E-07 |
| 24h | 1.05E-07  | 6.36E-08 | 2.03E-07 | 1.26E-07 |
| 36h | 1.88E-07  | 1.46E-07 | 2.04E-07 | 1.05E-07 |
| 48h | 9.48E-08  | 1.18E-07 | 3.38E-07 | 1.19E-07 |
| 72h | 1.21E-07  | 4.34E-08 | 1.98E-07 | 9.81E-08 |
|     | cgd1_2450 |          |          |          |
| 2h  | 6.53E-06  | 3.59E-06 | 3.29E-06 | 3.28E-06 |
| 6h  | 2.23E-06  | 9.61E-07 | 1.96E-07 | 8.60E-07 |
| 12h | 2.35E-06  | 3.55E-06 | 2.20E-06 | 7.33E-07 |
| 24h | 1.51E-06  | 3.08E-07 | 1.57E-06 | 3.63E-07 |
| 36h | 1.97E-06  | 1.14E-06 | 1.01E-06 | 1.23E-07 |
| 48h | 1.50E-06  | 1.13E-06 | 9.87E-07 | 2.97E-07 |
| 72h | 9.23E-07  | 3.08E-07 | 5.46E-07 | 2.47E-07 |
|     | cgd1_2480 |          |          |          |
| 2h  | 1.44E-03  | 4.96E-04 | 1.80E-04 | 5.06E-04 |

|     |           |          |          |          |
|-----|-----------|----------|----------|----------|
| 6h  | 6.57E-04  | 4.35E-04 | 7.90E-04 | 7.15E-04 |
| 12h | 1.01E-04  | 7.15E-05 | 1.63E-04 | 1.29E-04 |
| 24h | 4.39E-04  | 9.58E-05 | 3.55E-04 | 2.98E-04 |
| 36h | 3.79E-04  | 1.04E-04 | 5.22E-04 | 1.29E-04 |
| 48h | 1.25E-04  | 1.61E-04 | 4.93E-04 | 2.96E-04 |
| 72h | 1.37E-04  | 9.69E-05 | 1.45E-04 | 3.39E-04 |
|     | cgd1_2500 |          |          |          |
| 2h  | 4.56E-08  | 3.51E-08 | 1.46E-07 | 3.84E-09 |
| 6h  | 8.68E-06  | 2.21E-06 | 2.12E-06 | 2.86E-06 |
| 12h | 1.28E-07  | 2.84E-07 | 5.86E-07 | 2.70E-07 |
| 24h | 5.31E-07  | 1.52E-07 | 1.48E-06 | 9.71E-07 |
| 36h | 1.55E-06  | 6.62E-07 | 1.70E-06 | 6.96E-07 |
| 48h | 2.09E-07  | 1.75E-06 | 6.64E-07 | 2.42E-07 |
| 72h | 1.96E-07  | 1.27E-07 | 1.82E-07 | 8.66E-08 |
|     | cgd1_2520 |          |          |          |
| 2h  | 0.00E+00  | 0.00E+00 | 0.00E+00 | 0.00E+00 |
| 6h  | 0.00E+00  | 0.00E+00 | 0.00E+00 | 0.00E+00 |
| 12h | 1.89E-05  | 1.28E-05 | 5.96E-06 | 3.90E-06 |
| 24h | 8.06E-06  | 1.54E-06 | 1.26E-05 | 3.27E-06 |
| 36h | 2.10E-05  | 1.46E-05 | 4.93E-05 | 1.16E-05 |
| 48h | 6.05E-05  | 3.45E-05 | 1.29E-04 | 4.28E-05 |
| 72h | 6.49E-05  | 9.25E-05 | 2.05E-04 | 3.57E-05 |
|     | cgd1_2550 |          |          |          |
| 2h  | 0.00E+00  | 2.79E-09 | 0.00E+00 | 0.00E+00 |
| 6h  | 2.76E-07  | 4.33E-08 | 4.36E-08 | 2.88E-08 |
| 12h | 4.19E-09  | 3.84E-08 | 0.00E+00 | 1.38E-08 |
| 24h | 3.77E-07  | 2.14E-07 | 1.18E-07 | 1.61E-07 |
| 36h | 2.35E-07  | 1.56E-07 | 1.26E-07 | 1.00E-07 |
| 48h | 1.54E-06  | 9.51E-07 | 9.81E-07 | 3.54E-07 |
| 72h | 3.74E-07  | 1.51E-07 | 1.95E-07 | 1.61E-07 |
|     | cgd1_2560 |          |          |          |
| 2h  | 1.69E-05  | 6.50E-06 | 2.09E-04 | 1.96E-05 |
| 6h  | 7.01E-04  | 5.94E-05 | 2.88E-04 | 5.08E-04 |
| 12h | 1.80E-05  | 7.21E-05 | 7.51E-05 | 7.16E-05 |
| 24h | 1.04E-04  | 7.42E-06 | 6.97E-05 | 1.53E-04 |
| 36h | 1.18E-04  | 9.20E-05 | 6.16E-05 | 6.16E-05 |
| 48h | 3.22E-05  | 5.01E-05 | 1.02E-04 | 5.44E-05 |
| 72h | 6.34E-05  | 5.24E-05 | 5.91E-05 | 6.68E-05 |
|     | cgd1_2570 |          |          |          |
| 2h  | 5.22E-08  | 3.39E-08 | 5.24E-09 | 0.00E+00 |
| 6h  | 5.11E-07  | 6.44E-08 | 6.96E-07 | 5.37E-07 |
| 12h | 8.24E-07  | 4.77E-07 | 1.90E-07 | 1.78E-07 |
| 24h | 1.02E-06  | 6.77E-08 | 3.93E-07 | 2.87E-07 |
| 36h | 2.06E-06  | 1.02E-06 | 1.71E-06 | 6.80E-07 |
| 48h | 7.56E-07  | 4.04E-07 | 1.05E-06 | 2.57E-07 |
| 72h | 3.57E-07  | 2.20E-07 | 2.60E-07 | 1.22E-07 |
|     | cgd1_2610 |          |          |          |
| 2h  | 2.41E-08  | 3.03E-09 | 3.76E-08 | 2.62E-08 |
| 6h  | 6.23E-08  | 1.19E-08 | 1.61E-08 | 1.22E-08 |
| 12h | 5.34E-09  | 4.95E-09 | 1.73E-08 | 3.50E-09 |
| 24h | 2.04E-08  | 5.96E-09 | 1.58E-08 | 3.25E-08 |
| 36h | 1.55E-08  | 9.97E-09 | 2.30E-08 | 9.06E-09 |
| 48h | 1.50E-08  | 6.36E-09 | 6.56E-08 | 7.89E-09 |

|     |           |          |          |          |
|-----|-----------|----------|----------|----------|
| 72h | 1.22E-08  | 6.75E-09 | 1.91E-08 | 8.42E-09 |
|     | cgd1_2620 |          |          |          |
| 2h  | 5.38E-05  | 7.33E-05 | 3.39E-07 | 1.57E-06 |
| 6h  | 1.06E-06  | 7.88E-07 | 9.05E-08 | 7.96E-08 |
| 12h | 1.73E-05  | 6.27E-06 | 1.84E-06 | 9.85E-07 |
| 24h | 2.76E-06  | 1.30E-06 | 4.62E-07 | 6.16E-07 |
| 36h | 3.03E-06  | 1.23E-06 | 4.25E-07 | 1.44E-07 |
| 48h | 4.63E-06  | 3.60E-06 | 2.11E-06 | 4.63E-07 |
| 72h | 1.65E-06  | 1.28E-06 | 1.13E-06 | 9.79E-07 |
|     | cgd1_2650 |          |          |          |
| 2h  | 6.89E-04  | 1.73E-03 | 1.26E-03 | 2.92E-03 |
| 6h  | 3.90E-04  | 1.31E-04 | 1.03E-03 | 3.58E-04 |
| 12h | 6.23E-04  | 4.72E-04 | 1.19E-04 | 4.22E-04 |
| 24h | 7.88E-05  | 3.26E-04 | 1.21E-04 | 3.40E-04 |
| 36h | 1.77E-04  | 2.25E-04 | 2.32E-04 | 1.18E-04 |
| 48h | 1.25E-04  | 5.98E-05 | 1.83E-05 | 1.31E-05 |
| 72h | 2.00E-04  | 1.91E-04 | 3.62E-04 | 6.99E-05 |
|     | cgd1_2670 |          |          |          |
| 2h  | 1.18E-03  | 2.59E-04 | 5.82E-04 | 4.26E-04 |
| 6h  | 4.48E-04  | 6.27E-05 | 9.47E-04 | 5.13E-04 |
| 12h | 7.42E-04  | 6.61E-04 | 1.08E-03 | 1.45E-03 |
| 24h | 2.72E-04  | 8.58E-05 | 2.57E-04 | 6.29E-04 |
| 36h | 2.43E-04  | 6.59E-05 | 2.41E-04 | 4.33E-05 |
| 48h | 8.01E-05  | 2.18E-04 | 3.40E-04 | 9.15E-05 |
| 72h | 1.10E-04  | 6.32E-05 | 1.61E-04 | 4.82E-05 |
|     | cgd1_2680 |          |          |          |
| 2h  | 2.94E-08  | 1.75E-08 | 1.27E-08 | 5.34E-09 |
| 6h  | 4.52E-09  | 2.12E-09 | 2.81E-09 | 0.00E+00 |
| 12h | 2.92E-09  | 5.04E-09 | 5.03E-08 | 2.48E-08 |
| 24h | 5.60E-10  | 1.95E-09 | 8.01E-09 | 1.06E-08 |
| 36h | 4.20E-09  | 5.10E-09 | 7.67E-09 | 1.45E-09 |
| 48h | 1.18E-08  | 2.26E-08 | 4.29E-08 | 6.10E-09 |
| 72h | 2.66E-08  | 7.38E-09 | 3.35E-08 | 2.05E-08 |
|     | cgd1_2710 |          |          |          |
| 2h  | 2.71E-07  | 2.96E-07 | 3.47E-07 | 4.42E-07 |
| 6h  | 1.13E-06  | 2.96E-07 | 1.01E-06 | 2.60E-07 |
| 12h | 5.15E-07  | 2.89E-07 | 1.86E-08 | 2.14E-07 |
| 24h | 4.58E-07  | 3.23E-07 | 4.60E-07 | 4.32E-07 |
| 36h | 4.73E-07  | 3.68E-07 | 5.14E-07 | 1.28E-07 |
| 48h | 4.28E-07  | 3.50E-07 | 7.09E-07 | 1.36E-07 |
| 72h | 2.28E-07  | 8.69E-08 | 1.88E-07 | 1.26E-07 |
|     | cgd1_2720 |          |          |          |
| 2h  | 0.00E+00  | 1.55E-07 | 4.87E-08 | 3.18E-08 |
| 6h  | 2.13E-07  | 6.86E-08 | 1.27E-06 | 1.41E-07 |
| 12h | 1.56E-07  | 1.89E-07 | 8.47E-08 | 2.86E-08 |
| 24h | 2.81E-07  | 1.42E-07 | 7.18E-07 | 5.27E-07 |
| 36h | 9.68E-07  | 4.61E-07 | 2.96E-06 | 1.16E-06 |
| 48h | 1.33E-06  | 1.74E-06 | 6.74E-06 | 1.25E-06 |
| 72h | 7.62E-07  | 9.62E-07 | 2.45E-06 | 1.42E-06 |
|     | cgd1_2730 |          |          |          |
| 2h  | 3.20E-04  | 2.40E-04 | 7.44E-04 | 4.39E-04 |
| 6h  | 1.41E-04  | 6.20E-05 | 5.63E-04 | 2.94E-04 |
| 12h | 2.55E-04  | 1.16E-04 | 1.88E-04 | 2.28E-04 |

|     |           |          |          |          |
|-----|-----------|----------|----------|----------|
| 24h | 6.08E-05  | 6.92E-05 | 2.24E-04 | 1.97E-04 |
| 36h | 2.18E-04  | 1.10E-04 | 3.80E-04 | 1.47E-04 |
| 48h | 6.43E-05  | 7.41E-05 | 2.24E-04 | 8.06E-05 |
| 72h | 1.80E-05  | 1.97E-05 | 1.16E-04 | 4.02E-05 |
|     | cgd1_2740 |          |          |          |
| 2h  | 1.33E-03  | 5.83E-04 | 8.27E-04 | 7.82E-04 |
| 6h  | 8.00E-04  | 1.25E-03 | 6.72E-04 | 6.51E-03 |
| 12h | 4.54E-05  | 1.66E-04 | 6.00E-05 | 8.35E-04 |
| 24h | 5.57E-05  | 1.31E-04 | 4.42E-04 | 1.27E-03 |
| 36h | 3.00E-04  | 2.54E-04 | 2.58E-04 | 8.25E-04 |
| 48h | 1.82E-04  | 8.73E-05 | 1.71E-04 | 5.89E-04 |
| 72h | 5.69E-05  | 3.88E-05 | 3.66E-05 | 1.50E-04 |
|     | cgd1_2770 |          |          |          |
| 2h  | 6.72E-04  | 3.67E-04 | 2.95E-04 | 2.50E-04 |
| 6h  | 7.44E-05  | 2.08E-04 | 1.15E-04 | 2.48E-04 |
| 12h | 1.49E-04  | 4.90E-05 | 4.47E-05 | 5.31E-04 |
| 24h | 1.63E-04  | 1.56E-04 | 1.46E-04 | 3.10E-04 |
| 36h | 8.09E-05  | 1.87E-05 | 1.86E-05 | 8.10E-05 |
| 48h | 3.64E-05  | 1.04E-05 | 2.17E-05 | 3.34E-05 |
| 72h | 6.43E-06  | 3.11E-06 | 4.71E-06 | 8.62E-06 |
|     | cgd1_2780 |          |          |          |
| 2h  | 7.69E-06  | 1.69E-06 | 2.93E-06 | 1.36E-06 |
| 6h  | 1.50E-07  | 5.93E-07 | 7.04E-07 | 6.62E-07 |
| 12h | 7.98E-07  | 3.02E-07 | 9.95E-08 | 2.76E-06 |
| 24h | 1.52E-06  | 1.46E-06 | 1.26E-06 | 4.02E-06 |
| 36h | 2.06E-07  | 2.43E-07 | 1.76E-07 | 8.63E-07 |
| 48h | 4.28E-07  | 1.86E-07 | 2.20E-07 | 9.73E-07 |
| 72h | 1.72E-08  | 3.10E-08 | 6.65E-08 | 5.04E-08 |
|     | cgd1_2790 |          |          |          |
| 2h  | 0.00E+00  | 2.31E-08 | 0.00E+00 | 0.00E+00 |
| 6h  | 1.67E-07  | 1.59E-07 | 2.36E-07 | 1.09E-06 |
| 12h | 2.11E-08  | 2.98E-09 | 7.44E-10 | 3.39E-08 |
| 24h | 1.53E-08  | 9.22E-09 | 1.07E-07 | 2.47E-07 |
| 36h | 4.98E-08  | 4.13E-08 | 1.91E-08 | 3.90E-08 |
| 48h | 1.22E-07  | 2.75E-08 | 1.82E-08 | 1.44E-07 |
| 72h | 1.64E-08  | 1.46E-08 | 1.04E-08 | 8.74E-09 |
|     | cgd1_2800 |          |          |          |
| 2h  | 4.54E-05  | 1.17E-04 | 6.56E-06 | 0.00E+00 |
| 6h  | 5.61E-05  | 7.51E-05 | 6.04E-05 | 1.33E-04 |
| 12h | 1.87E-06  | 1.77E-06 | 1.78E-06 | 5.09E-05 |
| 24h | 4.85E-06  | 7.62E-06 | 1.41E-05 | 2.05E-04 |
| 36h | 2.84E-05  | 1.50E-05 | 4.57E-06 | 3.88E-05 |
| 48h | 2.90E-05  | 4.70E-06 | 2.38E-06 | 1.53E-05 |
| 72h | 5.46E-06  | 6.98E-06 | 2.39E-06 | 9.48E-05 |
|     | cgd1_2810 |          |          |          |
| 2h  | 2.41E-07  | 9.68E-08 | 5.54E-06 | 0.00E+00 |
| 6h  | 7.72E-06  | 1.47E-06 | 2.06E-06 | 5.13E-06 |
| 12h | 1.82E-08  | 0.00E+00 | 2.04E-06 | 8.18E-07 |
| 24h | 1.72E-07  | 1.84E-07 | 6.08E-07 | 4.25E-06 |
| 36h | 2.72E-07  | 3.46E-07 | 1.56E-06 | 2.34E-06 |
| 48h | 2.77E-07  | 8.28E-08 | 9.45E-07 | 5.57E-07 |
| 72h | 1.02E-07  | 8.97E-08 | 1.87E-07 | 6.85E-08 |
|     | cgd1_2830 |          |          |          |

|     |           |          |          |          |
|-----|-----------|----------|----------|----------|
| 2h  | 0.00E+00  | 0.00E+00 | 1.39E-07 | 0.00E+00 |
| 6h  | 2.69E-06  | 2.64E-06 | 1.16E-06 | 1.77E-06 |
| 12h | 2.46E-07  | 4.03E-07 | 2.52E-07 | 3.10E-06 |
| 24h | 5.29E-07  | 1.10E-06 | 2.46E-06 | 1.19E-05 |
| 36h | 1.42E-06  | 2.75E-06 | 3.76E-06 | 4.22E-06 |
| 48h | 1.80E-06  | 1.62E-06 | 4.10E-06 | 5.02E-06 |
| 72h | 1.43E-06  | 7.16E-07 | 5.44E-07 | 1.17E-06 |
|     | cgd1_2840 |          |          |          |
| 2h  | 6.98E-05  | 2.36E-05 | 3.15E-04 | 0.00E+00 |
| 6h  | 7.47E-05  | 4.61E-05 | 1.37E-03 | 4.41E-04 |
| 12h | 1.24E-07  | 0.00E+00 | 1.62E-04 | 1.80E-04 |
| 24h | 1.74E-05  | 1.33E-05 | 1.42E-04 | 1.66E-04 |
| 36h | 2.53E-05  | 1.42E-05 | 2.26E-04 | 6.46E-05 |
| 48h | 2.72E-05  | 2.16E-05 | 3.71E-04 | 1.39E-04 |
| 72h | 4.62E-06  | 4.97E-06 | 9.23E-05 | 1.51E-05 |
|     | cgd1_2850 |          |          |          |
| 2h  | 0.00E+00  | 0.00E+00 | 0.00E+00 | 0.00E+00 |
| 6h  | 0.00E+00  | 2.71E-07 | 1.97E-05 | 0.00E+00 |
| 12h | 3.20E-04  | 3.94E-04 | 5.15E-04 | 3.77E-04 |
| 24h | 6.11E-05  | 1.49E-04 | 1.08E-04 | 1.41E-04 |
| 36h | 3.69E-04  | 4.32E-04 | 3.41E-04 | 2.63E-04 |
| 48h | 1.38E-04  | 6.47E-05 | 1.24E-03 | 5.45E-05 |
| 72h | 8.30E-05  | 6.55E-05 | 4.68E-04 | 3.96E-05 |
|     | cgd1_2860 |          |          |          |
| 2h  | 4.54E-08  | 3.00E-08 | 1.88E-08 | 0.00E+00 |
| 6h  | 0.00E+00  | 3.82E-09 | 2.51E-09 | 1.05E-06 |
| 12h | 0.00E+00  | 1.30E-08 | 1.26E-07 | 9.84E-08 |
| 24h | 6.81E-09  | 1.51E-08 | 4.31E-07 | 1.80E-06 |
| 36h | 2.13E-07  | 2.33E-07 | 3.87E-07 | 5.29E-06 |
| 48h | 6.96E-08  | 8.91E-08 | 2.01E-06 | 2.29E-06 |
| 72h | 5.01E-07  | 1.79E-07 | 1.21E-06 | 1.56E-06 |
|     | cgd1_2880 |          |          |          |
| 2h  | 2.18E-04  | 3.02E-04 | 8.63E-04 | 1.82E-03 |
| 6h  | 1.90E-04  | 1.74E-04 | 2.52E-04 | 1.52E-03 |
| 12h | 6.64E-04  | 5.62E-04 | 5.79E-04 | 2.43E-03 |
| 24h | 1.38E-04  | 1.59E-04 | 2.15E-04 | 2.33E-03 |
| 36h | 2.01E-04  | 1.91E-04 | 4.81E-04 | 1.23E-03 |
| 48h | 1.06E-04  | 7.07E-05 | 3.26E-04 | 6.59E-04 |
| 72h | 4.27E-05  | 3.01E-05 | 1.25E-04 | 1.83E-04 |
|     | cgd2_2940 |          |          |          |
| 2h  | 1.48E-04  | 1.53E-04 | 7.44E-05 | 5.19E-06 |
| 6h  | 8.64E-05  | 1.04E-04 | 6.36E-05 | 8.81E-07 |
| 12h | 8.40E-05  | 1.81E-05 | 2.83E-05 | 8.58E-07 |
| 24h | 3.40E-05  | 9.35E-05 | 1.15E-05 | 1.42E-06 |
| 36h | 2.76E-05  | 4.61E-05 | 3.33E-06 | 1.53E-06 |
| 48h | 2.67E-05  | 5.25E-05 | 1.49E-05 | 1.00E-04 |
| 72h | 5.55E-06  | 2.65E-05 | 4.08E-06 | 2.47E-05 |
|     | cgd2_2960 |          |          |          |
| 2h  | 1.37E-06  | 1.03E-06 | 3.30E-07 | 2.25E-09 |
| 6h  | 9.99E-07  | 8.91E-07 | 4.35E-07 | 3.74E-08 |
| 12h | 4.30E-07  | 3.25E-08 | 3.08E-07 | 7.30E-09 |
| 24h | 4.52E-07  | 1.66E-06 | 1.83E-07 | 1.61E-08 |
| 36h | 6.75E-07  | 1.22E-06 | 6.19E-08 | 5.97E-08 |



|     |           |          |          |          |
|-----|-----------|----------|----------|----------|
| 48h | 7.51E-08  | 4.13E-07 | 1.08E-07 | 5.68E-07 |
| 72h | 1.08E-07  | 4.50E-07 | 1.09E-07 | 1.09E-06 |
|     | cgd2_2970 |          |          |          |
| 2h  | 2.26E-03  | 4.66E-05 | 3.91E-06 | 1.89E-04 |
| 6h  | 2.00E-05  | 1.59E-04 | 1.16E-06 | 1.51E-04 |
| 12h | 2.75E-04  | 2.28E-04 | 1.53E-07 | 3.61E-05 |
| 24h | 1.10E-04  | 4.90E-05 | 2.26E-06 | 2.57E-05 |
| 36h | 2.10E-04  | 2.43E-04 | 1.19E-07 | 6.60E-05 |
| 48h | 1.33E-05  | 7.19E-05 | 1.37E-05 | 1.33E-04 |
| 72h | 3.51E-05  | 2.86E-04 | 2.91E-06 | 1.75E-04 |
|     | cgd2_2980 |          |          |          |
| 2h  | 1.56E-05  | 4.26E-06 | 2.47E-07 | 2.78E-06 |
| 6h  | 0.00E+00  | 0.00E+00 | 3.93E-08 | 0.00E+00 |
| 12h | 0.00E+00  | 1.13E-07 | 0.00E+00 | 0.00E+00 |
| 24h | 1.44E-05  | 1.77E-06 | 5.73E-08 | 1.92E-06 |
| 36h | 7.56E-06  | 4.80E-07 | 1.85E-06 | 3.78E-05 |
| 48h | 1.82E-05  | 2.91E-06 | 1.03E-05 | 3.03E-05 |
| 72h | 5.58E-05  | 4.19E-06 | 6.27E-05 | 3.80E-05 |
|     | cgd2_2990 |          |          |          |
| 2h  | 1.00E-06  | 1.36E-06 | 1.95E-06 | 3.65E-07 |
| 6h  | 4.14E-06  | 9.66E-06 | 1.14E-05 | 1.78E-06 |
| 12h | 1.26E-06  | 3.05E-06 | 5.30E-06 | 1.18E-06 |
| 24h | 2.60E-06  | 1.02E-05 | 6.63E-06 | 2.31E-06 |
| 36h | 4.89E-07  | 2.16E-06 | 1.49E-06 | 1.13E-06 |
| 48h | 4.97E-07  | 1.79E-06 | 2.31E-06 | 3.43E-06 |
| 72h | 1.09E-07  | 6.75E-07 | 1.89E-07 | 2.32E-06 |
|     | cgd2_3000 |          |          |          |
| 2h  | 2.73E-06  | 2.70E-06 | 3.57E-06 | 2.53E-06 |
| 6h  | 2.95E-05  | 1.62E-05 | 8.93E-06 | 1.12E-05 |
| 12h | 7.89E-06  | 4.89E-06 | 6.14E-06 | 8.70E-06 |
| 24h | 1.20E-05  | 2.27E-05 | 1.06E-05 | 8.99E-06 |
| 36h | 3.43E-06  | 8.59E-06 | 7.34E-06 | 2.07E-06 |
| 48h | 4.33E-06  | 4.03E-06 | 3.01E-06 | 6.98E-06 |
| 72h | 5.04E-07  | 2.53E-06 | 3.66E-07 | 2.10E-06 |
|     | cgd2_3010 |          |          |          |
| 2h  | 1.41E-07  | 1.99E-07 | 3.06E-08 | 1.14E-08 |
| 6h  | 3.47E-07  | 3.48E-07 | 1.99E-07 | 6.17E-08 |
| 12h | 1.31E-07  | 9.87E-08 | 5.27E-08 | 2.51E-09 |
| 24h | 1.93E-07  | 9.83E-07 | 1.38E-07 | 1.02E-08 |
| 36h | 2.91E-07  | 8.54E-07 | 4.74E-08 | 7.81E-08 |
| 48h | 2.21E-07  | 5.00E-07 | 2.12E-07 | 6.55E-07 |
| 72h | 2.04E-04  | 1.30E-06 | 1.25E-07 | 7.62E-07 |
|     | cgd2_2930 |          |          |          |
| 2h  | 1.50E-08  | 7.21E-08 | 2.17E-08 | 0.00E+00 |
| 6h  | 0.00E+00  | 0.00E+00 | 1.56E-10 | 0.00E+00 |
| 12h | 2.96E-07  | 5.45E-08 | 2.76E-08 | 0.00E+00 |
| 24h | 1.62E-08  | 4.87E-08 | 1.83E-08 | 8.37E-10 |
| 36h | 1.48E-07  | 9.24E-08 | 7.17E-09 | 8.61E-09 |
| 48h | 3.89E-08  | 8.53E-08 | 1.16E-08 | 1.15E-07 |
| 72h | 5.46E-08  | 3.98E-07 | 4.61E-08 | 6.68E-07 |
|     | cgd2_3020 |          |          |          |
| 2h  | 3.47E-05  | 3.27E-05 | 0.00E+00 | 3.28E-05 |
| 6h  | 6.94E-05  | 1.07E-04 | 5.37E-05 | 8.72E-05 |

|     |           |          |          |          |
|-----|-----------|----------|----------|----------|
| 12h | 6.92E-05  | 1.53E-05 | 1.51E-05 | 5.13E-05 |
| 24h | 3.32E-05  | 2.89E-04 | 7.15E-05 | 5.07E-05 |
| 36h | 7.67E-05  | 4.89E-05 | 1.79E-05 | 5.98E-05 |
| 48h | 3.15E-05  | 1.79E-04 | 4.74E-05 | 3.89E-05 |
| 72h | 7.33E-05  | 1.22E-04 | 2.68E-05 | 1.84E-04 |
|     | cgd2_3030 |          |          |          |
| 2h  | 1.70E-09  | 0.00E+00 | 0.00E+00 | 0.00E+00 |
| 6h  | 7.06E-10  | 8.43E-10 | 0.00E+00 | 0.00E+00 |
| 12h | 9.30E-09  | 7.40E-09 | 6.53E-09 | 1.49E-09 |
| 24h | 3.77E-09  | 1.67E-08 | 4.28E-09 | 0.00E+00 |
| 36h | 4.36E-08  | 2.60E-08 | 1.21E-08 | 2.10E-08 |
| 48h | 2.91E-08  | 4.65E-08 | 2.00E-08 | 7.10E-08 |
| 72h | 7.02E-08  | 5.01E-08 | 2.65E-08 | 1.51E-07 |
|     | cgd2_3040 |          |          |          |
| 2h  | 2.94E-08  | 3.13E-08 | 3.71E-08 | 0.00E+00 |
| 6h  | 0.00E+00  | 0.00E+00 | 0.00E+00 | 0.00E+00 |
| 12h | 9.94E-09  | 0.00E+00 | 7.93E-10 | 0.00E+00 |
| 24h | 5.54E-09  | 6.79E-09 | 7.69E-09 | 1.64E-09 |
| 36h | 1.17E-08  | 7.53E-09 | 2.68E-09 | 7.12E-10 |
| 48h | 5.42E-08  | 1.52E-07 | 1.87E-07 | 2.39E-07 |
| 72h | 1.08E-06  | 1.85E-06 | 6.29E-07 | 0.00E+00 |
|     | cgd2_3050 |          |          |          |
| 2h  | 1.00E-05  | 5.50E-06 | 2.82E-06 | 1.95E-07 |
| 6h  | 1.76E-08  | 4.48E-08 | 8.55E-09 | 0.00E+00 |
| 12h | 3.21E-06  | 1.22E-06 | 6.50E-07 | 2.52E-07 |
| 24h | 1.35E-07  | 3.96E-07 | 1.24E-07 | 8.43E-09 |
| 36h | 5.03E-07  | 7.75E-07 | 6.26E-08 | 1.51E-07 |
| 48h | 3.13E-07  | 1.04E-06 | 9.96E-07 | 3.56E-06 |
| 72h | 1.86E-06  | 3.43E-06 | 9.78E-07 | 3.64E-06 |
|     | cgd2_3060 |          |          |          |
| 2h  | 3.05E-06  | 4.70E-07 | 2.56E-08 | 9.33E-07 |
| 6h  | 3.76E-08  | 1.71E-09 | 1.15E-08 | 5.90E-09 |
| 12h | 5.90E-07  | 1.30E-07 | 3.21E-08 | 4.96E-08 |
| 24h | 3.43E-08  | 3.89E-08 | 1.42E-08 | 1.03E-07 |
| 36h | 1.35E-07  | 1.88E-08 | 9.35E-09 | 1.47E-07 |
| 48h | 1.32E-07  | 9.69E-08 | 3.20E-07 | 1.54E-07 |
| 72h | 9.24E-08  | 1.98E-07 | 1.12E-06 | 5.43E-07 |
|     | cgd2_3070 |          |          |          |
| 2h  | 4.39E-04  | 1.02E-04 | 2.46E-05 | 2.33E-04 |
| 6h  | 8.41E-06  | 9.74E-07 | 8.50E-07 | 5.41E-07 |
| 12h | 1.80E-04  | 8.55E-05 | 4.44E-05 | 7.82E-05 |
| 24h | 2.34E-05  | 1.81E-05 | 1.28E-05 | 4.72E-05 |
| 36h | 2.73E-05  | 1.71E-05 | 1.17E-05 | 2.09E-05 |
| 48h | 1.46E-05  | 1.14E-05 | 5.51E-05 | 1.45E-05 |
| 72h | 4.99E-06  | 1.63E-05 | 7.29E-05 | 2.26E-05 |
|     | cgd2_3080 |          |          |          |
| 2h  | 3.85E-08  | 0.00E+00 | 0.00E+00 | 0.00E+00 |
| 6h  | 4.50E-08  | 3.92E-08 | 3.58E-08 | 4.57E-08 |
| 12h | 1.96E-07  | 8.27E-09 | 0.00E+00 | 7.58E-09 |
| 24h | 1.05E-07  | 6.94E-08 | 3.37E-08 | 1.45E-07 |
| 36h | 2.84E-07  | 7.87E-08 | 6.64E-08 | 2.38E-07 |
| 48h | 2.38E-07  | 2.29E-07 | 1.49E-06 | 2.19E-07 |
| 72h | 1.07E-07  | 1.01E-07 | 1.47E-06 | 2.49E-07 |

|     |           |          |          |          |
|-----|-----------|----------|----------|----------|
|     | cgd2_3090 |          |          |          |
| 2h  | 1.22E-07  | 2.74E-09 | 3.18E-09 | 2.79E-08 |
| 6h  | 1.37E-06  | 7.67E-07 | 1.21E-07 | 3.75E-07 |
| 12h | 1.49E-06  | 2.41E-07 | 1.04E-07 | 1.34E-07 |
| 24h | 9.79E-07  | 7.12E-07 | 1.88E-07 | 7.55E-07 |
| 36h | 1.63E-06  | 1.12E-06 | 1.46E-06 | 1.45E-06 |
| 48h | 8.66E-07  | 8.69E-07 | 5.40E-06 | 9.52E-07 |
| 72h | 1.19E-07  | 1.53E-07 | 1.36E-06 | 4.78E-07 |
|     | cgd2_3140 |          |          |          |
| 2h  | 0.00E+00  | 0.00E+00 | 0.00E+00 | 0.00E+00 |
| 6h  | 8.21E-09  | 8.54E-10 | 0.00E+00 | 7.47E-09 |
| 12h | 7.23E-09  | 0.00E+00 | 0.00E+00 | 0.00E+00 |
| 24h | 1.17E-09  | 2.42E-09 | 3.90E-10 | 4.32E-08 |
| 36h | 3.20E-08  | 5.63E-10 | 4.24E-10 | 3.42E-08 |
| 48h | 6.15E-07  | 4.36E-07 | 1.95E-06 | 1.23E-06 |
| 72h | 1.93E-07  | 1.44E-06 | 9.43E-06 | 4.53E-06 |
|     | cgd2_3170 |          |          |          |
| 2h  | 0.00E+00  | 0.00E+00 | 0.00E+00 | 0.00E+00 |
| 6h  | 4.61E-06  | 8.71E-07 | 5.75E-07 | 1.21E-05 |
| 12h | 1.51E-05  | 6.77E-07 | 0.00E+00 | 0.00E+00 |
| 24h | 1.72E-05  | 1.96E-06 | 8.01E-08 | 9.83E-05 |
| 36h | 4.25E-05  | 2.32E-06 | 2.03E-06 | 3.57E-04 |
| 48h | 2.58E-05  | 8.51E-06 | 1.38E-04 | 6.63E-05 |
| 72h | 1.16E-05  | 2.70E-05 | 3.86E-04 | 7.66E-05 |
|     | cgd2_3180 |          |          |          |
| 2h  | 4.77E-09  | 0.00E+00 | 0.00E+00 | 0.00E+00 |
| 6h  | 1.96E-06  | 9.33E-07 | 9.51E-08 | 9.43E-07 |
| 12h | 5.04E-07  | 2.74E-08 | 0.00E+00 | 6.67E-09 |
| 24h | 1.95E-06  | 3.98E-07 | 2.38E-07 | 2.09E-06 |
| 36h | 1.11E-06  | 1.58E-07 | 2.63E-07 | 1.69E-06 |
| 48h | 4.89E-07  | 4.33E-07 | 2.51E-06 | 9.82E-07 |
| 72h | 1.99E-07  | 4.12E-07 | 2.10E-06 | 1.06E-06 |
|     | cgd2_3190 |          |          |          |
| 2h  | 1.90E-09  | 0.00E+00 | 0.00E+00 | 0.00E+00 |
| 6h  | 0.00E+00  | 1.17E-08 | 0.00E+00 | 0.00E+00 |
| 12h | 1.45E-05  | 5.04E-07 | 9.99E-08 | 2.61E-07 |
| 24h | 3.06E-07  | 4.47E-08 | 3.93E-09 | 6.66E-07 |
| 36h | 1.23E-06  | 9.72E-08 | 1.41E-07 | 9.67E-07 |
| 48h | 2.25E-07  | 2.09E-07 | 1.29E-06 | 5.17E-07 |
| 72h | 3.28E-07  | 9.42E-07 | 4.56E-06 | 1.62E-06 |
|     | cgd2_3200 |          |          |          |
| 2h  | 1.36E-08  | 0.00E+00 | 0.00E+00 | 0.00E+00 |
| 6h  | 1.54E-06  | 2.60E-06 | 2.52E-06 | 6.36E-08 |
| 12h | 8.17E-07  | 1.52E-07 | 1.41E-06 | 2.80E-08 |
| 24h | 1.63E-06  | 1.45E-06 | 4.55E-08 | 2.72E-06 |
| 36h | 3.07E-06  | 1.28E-06 | 2.91E-06 | 2.35E-06 |
| 48h | 8.64E-07  | 1.71E-06 | 4.59E-06 | 8.95E-07 |
| 72h | 3.31E-06  | 7.65E-07 | 1.33E-05 | 2.46E-06 |
|     | cgd2_3210 |          |          |          |
| 2h  | 3.47E-06  | 4.52E-07 | 1.93E-06 | 1.39E-06 |
| 6h  | 8.06E-07  | 5.65E-08 | 1.38E-08 | 1.53E-07 |
| 12h | 9.97E-06  | 1.80E-06 | 1.96E-06 | 7.66E-07 |
| 24h | 3.00E-06  | 1.28E-06 | 7.46E-06 | 1.59E-06 |

|     |           |          |          |          |
|-----|-----------|----------|----------|----------|
| 36h | 2.45E-05  | 1.01E-05 | 2.07E-05 | 1.05E-05 |
| 48h | 1.18E-05  | 5.64E-06 | 2.20E-05 | 2.11E-06 |
| 72h | 9.87E-06  | 1.18E-05 | 1.52E-05 | 9.58E-06 |
|     | cgd2_3220 |          |          |          |
| 2h  | 7.83E-07  | 2.38E-07 | 2.89E-09 | 8.13E-07 |
| 6h  | 3.40E-06  | 4.29E-07 | 1.70E-07 | 1.82E-06 |
| 12h | 1.71E-06  | 2.73E-07 | 7.13E-08 | 4.20E-07 |
| 24h | 8.62E-07  | 5.62E-07 | 1.11E-07 | 2.83E-06 |
| 36h | 7.81E-07  | 1.09E-07 | 1.15E-07 | 8.06E-07 |
| 48h | 2.71E-07  | 2.17E-07 | 1.30E-06 | 5.90E-07 |
| 72h | 2.91E-08  | 5.05E-08 | 7.39E-07 | 2.35E-07 |
|     | cgd2_3230 |          |          |          |
| 2h  | 2.40E-06  | 2.61E-07 | 2.35E-08 | 1.01E-06 |
| 6h  | 1.37E-06  | 1.00E-06 | 1.25E-07 | 8.14E-07 |
| 12h | 4.42E-07  | 1.38E-07 | 2.59E-08 | 3.12E-08 |
| 24h | 6.73E-07  | 3.28E-07 | 7.85E-08 | 1.64E-06 |
| 36h | 1.68E-06  | 3.70E-07 | 9.57E-07 | 1.75E-06 |
| 48h | 4.49E-07  | 4.85E-07 | 2.67E-06 | 7.50E-07 |
| 72h | 8.21E-07  | 6.16E-07 | 9.81E-06 | 3.55E-06 |
|     | cgd2_3130 |          |          |          |
| 2h  | 0.00E+00  | 0.00E+00 | 0.00E+00 | 0.00E+00 |
| 6h  | 0.00E+00  | 2.79E-10 | 3.24E-10 | 0.00E+00 |
| 12h | 0.00E+00  | 2.16E-09 | 3.05E-10 | 0.00E+00 |
| 24h | 0.00E+00  | 3.34E-10 | 8.28E-11 | 0.00E+00 |
| 36h | 2.77E-09  | 4.77E-09 | 9.71E-10 | 3.12E-10 |
| 48h | 2.29E-07  | 1.29E-07 | 1.54E-07 | 4.74E-07 |
| 72h | 7.86E-07  | 1.57E-07 | 2.00E-07 | 1.28E-06 |
|     | cgd2_3240 |          |          |          |
| 2h  | 1.40E-08  | 1.01E-08 | 2.98E-09 | 0.00E+00 |
| 6h  | 8.89E-09  | 1.09E-08 | 2.40E-08 | 4.65E-09 |
| 12h | 4.88E-09  | 2.71E-08 | 7.37E-09 | 2.61E-09 |
| 24h | 5.66E-08  | 2.04E-08 | 2.79E-08 | 8.23E-09 |
| 36h | 2.27E-07  | 6.37E-08 | 3.27E-09 | 3.59E-08 |
| 48h | 2.46E-07  | 1.18E-07 | 6.98E-08 | 2.55E-07 |
| 72h | 8.00E-06  | 9.58E-07 | 1.26E-06 | 3.85E-06 |
|     | cgd2_3250 |          |          |          |
| 2h  | 3.25E-08  | 3.87E-08 | 4.57E-08 | 2.25E-09 |
| 6h  | 4.01E-08  | 1.49E-08 | 1.55E-08 | 4.37E-09 |
| 12h | 1.29E-08  | 2.87E-08 | 1.74E-08 | 5.05E-09 |
| 24h | 4.20E-08  | 1.58E-08 | 3.11E-08 | 7.81E-09 |
| 36h | 7.35E-08  | 8.60E-08 | 1.85E-09 | 6.88E-09 |
| 48h | 2.05E-07  | 5.63E-08 | 7.71E-08 | 2.01E-07 |
| 72h | 3.88E-06  | 8.73E-07 | 8.61E-07 | 6.46E-06 |
|     | cgd2_3260 |          |          |          |
| 2h  | 4.06E-08  | 2.71E-07 | 1.03E-07 | 1.03E-09 |
| 6h  | 3.62E-08  | 4.13E-08 | 6.64E-08 | 4.73E-09 |
| 12h | 1.46E-08  | 1.34E-07 | 1.93E-08 | 5.75E-09 |
| 24h | 3.71E-07  | 7.66E-08 | 5.68E-08 | 1.65E-08 |
| 36h | 1.35E-06  | 1.16E-06 | 1.15E-07 | 1.43E-07 |
| 48h | 1.31E-06  | 1.03E-06 | 4.09E-07 | 6.02E-06 |
| 72h | 1.11E-06  | 2.04E-07 | 2.11E-07 | 2.56E-06 |
|     | cgd2_3330 |          |          |          |
| 2h  | 1.15E-07  | 6.94E-07 | 2.26E-08 | 0.00E+00 |

|     |           |          |          |          |
|-----|-----------|----------|----------|----------|
| 6h  | 2.37E-05  | 1.67E-05 | 2.37E-05 | 9.89E-07 |
| 12h | 3.14E-07  | 2.95E-06 | 2.26E-07 | 0.00E+00 |
| 24h | 5.49E-05  | 1.59E-05 | 1.02E-05 | 1.05E-06 |
| 36h | 2.61E-05  | 3.98E-05 | 2.08E-06 | 2.03E-06 |
| 48h | 8.41E-06  | 4.34E-06 | 3.31E-06 | 2.07E-05 |
| 72h | 4.79E-06  | 1.13E-06 | 4.79E-07 | 2.32E-06 |
|     | cgd2_3340 |          |          |          |
| 2h  | 2.12E-08  | 4.38E-08 | 1.83E-07 | 5.54E-08 |
| 6h  | 4.13E-07  | 1.03E-06 | 1.14E-06 | 4.56E-08 |
| 12h | 3.26E-09  | 1.08E-07 | 6.29E-08 | 1.13E-08 |
| 24h | 1.24E-06  | 1.04E-06 | 5.52E-07 | 4.52E-08 |
| 36h | 7.24E-07  | 8.16E-07 | 9.87E-08 | 8.59E-08 |
| 48h | 3.99E-07  | 2.40E-07 | 1.39E-07 | 6.63E-07 |
| 72h | 1.36E-07  | 4.37E-08 | 1.46E-08 | 2.54E-07 |
|     | cgd2_3360 |          |          |          |
| 2h  | 0.00E+00  | 0.00E+00 | 0.00E+00 | 0.00E+00 |
| 6h  | 0.00E+00  | 0.00E+00 | 0.00E+00 | 0.00E+00 |
| 12h | 0.00E+00  | 8.00E-06 | 1.68E-05 | 2.26E-05 |
| 24h | 4.87E-06  | 2.15E-06 | 1.52E-06 | 4.44E-07 |
| 36h | 9.67E-06  | 9.37E-06 | 3.25E-05 | 1.26E-05 |
| 48h | 1.55E-05  | 1.04E-05 | 3.14E-05 | 1.61E-05 |
| 72h | 5.06E-05  | 3.35E-05 | 3.35E-06 | 1.35E-05 |
|     | cgd2_3370 |          |          |          |
| 2h  | 0.00E+00  | 0.00E+00 | 0.00E+00 | 0.00E+00 |
| 6h  | 3.85E-07  | 3.27E-07 | 2.25E-06 | 5.75E-06 |
| 12h | 1.01E-07  | 5.01E-08 | 3.37E-08 | 8.18E-08 |
| 24h | 1.03E-06  | 4.13E-07 | 6.04E-07 | 4.49E-06 |
| 36h | 6.90E-07  | 2.04E-06 | 1.97E-06 | 9.87E-06 |
| 48h | 1.45E-06  | 2.28E-06 | 8.73E-07 | 4.45E-06 |
| 72h | 1.33E-06  | 9.53E-07 | 1.06E-07 | 8.66E-06 |
|     | cgd2_3400 |          |          |          |
| 2h  | 1.62E-05  | 9.05E-06 | 3.59E-07 | 0.00E+00 |
| 6h  | 1.27E-05  | 1.45E-05 | 1.63E-05 | 3.82E-06 |
| 12h | 6.98E-06  | 9.65E-07 | 1.02E-07 | 0.00E+00 |
| 24h | 3.41E-05  | 1.12E-05 | 3.23E-05 | 2.12E-06 |
| 36h | 2.47E-05  | 2.97E-05 | 8.27E-07 | 9.64E-06 |
| 48h | 4.54E-05  | 7.23E-05 | 1.01E-05 | 8.07E-05 |
| 72h | 7.43E-05  | 4.06E-05 | 4.85E-05 | 2.72E-04 |
|     | cgd2_3430 |          |          |          |
| 2h  | 5.58E-07  | 5.88E-07 | 3.27E-07 | 4.83E-08 |
| 6h  | 2.97E-07  | 1.31E-07 | 8.98E-08 | 1.54E-08 |
| 12h | 1.82E-07  | 1.67E-06 | 1.63E-07 | 4.59E-08 |
| 24h | 7.65E-07  | 1.36E-07 | 1.46E-07 | 1.19E-08 |
| 36h | 4.14E-07  | 8.95E-07 | 3.24E-08 | 4.77E-08 |
| 48h | 2.21E-07  | 1.40E-07 | 1.13E-07 | 9.18E-07 |
| 72h | 2.60E-07  | 2.48E-07 | 7.58E-08 | 1.31E-06 |
|     | cgd2_3440 |          |          |          |
| 2h  | 3.60E-07  | 1.83E-07 | 4.93E-07 | 6.26E-08 |
| 6h  | 1.90E-07  | 1.33E-07 | 1.84E-07 | 5.73E-08 |
| 12h | 2.27E-07  | 4.20E-07 | 2.04E-07 | 7.92E-08 |
| 24h | 4.50E-07  | 6.41E-08 | 1.51E-07 | 2.56E-08 |
| 36h | 1.24E-07  | 2.66E-07 | 2.60E-08 | 4.51E-08 |
| 48h | 2.80E-07  | 1.72E-07 | 8.50E-08 | 5.12E-07 |

|     |           |          |          |          |
|-----|-----------|----------|----------|----------|
| 72h | 2.24E-07  | 6.78E-08 | 5.66E-08 | 4.26E-07 |
|     | cgd2_3450 |          |          |          |
| 2h  | 0.00E+00  | 1.73E-08 | 1.45E-08 | 1.12E-08 |
| 6h  | 1.98E-07  | 2.81E-07 | 2.50E-07 | 5.00E-08 |
| 12h | 3.31E-07  | 7.44E-07 | 9.14E-08 | 1.56E-07 |
| 24h | 1.66E-06  | 3.77E-07 | 1.78E-07 | 6.68E-08 |
| 36h | 2.80E-06  | 2.41E-06 | 1.05E-07 | 2.51E-06 |
| 48h | 2.30E-06  | 7.15E-07 | 4.87E-07 | 1.59E-06 |
| 72h | 1.14E-05  | 5.11E-06 | 9.83E-07 | 1.15E-05 |
|     | cgd2_3460 |          |          |          |
| 2h  | 0.00E+00  | 0.00E+00 | 0.00E+00 | 7.21E-08 |
| 6h  | 1.32E-07  | 1.17E-07 | 6.75E-08 | 6.74E-09 |
| 12h | 2.77E-08  | 5.88E-08 | 5.27E-09 | 7.10E-10 |
| 24h | 1.46E-07  | 2.29E-08 | 2.54E-08 | 3.39E-09 |
| 36h | 4.71E-08  | 1.07E-07 | 9.41E-09 | 4.23E-09 |
| 48h | 1.98E-07  | 9.50E-08 | 1.09E-07 | 2.68E-07 |
| 72h | 9.07E-07  | 4.53E-07 | 2.42E-07 | 7.11E-07 |
|     | cgd2_3480 |          |          |          |
| 2h  | 0.00E+00  | 0.00E+00 | 0.00E+00 | 0.00E+00 |
| 6h  | 0.00E+00  | 6.86E-09 | 1.28E-06 | 0.00E+00 |
| 12h | 2.72E-08  | 3.54E-05 | 1.05E-06 | 1.70E-07 |
| 24h | 2.96E-05  | 1.03E-05 | 3.74E-06 | 2.08E-08 |
| 36h | 9.50E-05  | 1.16E-04 | 1.43E-06 | 3.82E-06 |
| 48h | 9.17E-05  | 5.08E-05 | 2.52E-05 | 9.66E-05 |
| 72h | 9.31E-04  | 1.44E-04 | 1.15E-04 | 2.54E-04 |
|     | cgd2_3510 |          |          |          |
| 2h  | 8.93E-09  | 6.69E-09 | 3.43E-09 | 9.56E-09 |
| 6h  | 4.66E-09  | 3.84E-09 | 1.07E-08 | 1.07E-09 |
| 12h | 0.00E+00  | 2.83E-09 | 2.01E-09 | 4.39E-10 |
| 24h | 2.79E-09  | 3.17E-09 | 6.91E-09 | 2.27E-09 |
| 36h | 6.53E-09  | 1.75E-08 | 7.77E-10 | 2.10E-09 |
| 48h | 1.52E-08  | 1.59E-08 | 3.72E-09 | 2.24E-08 |
| 72h | 1.61E-08  | 1.50E-08 | 3.44E-09 | 3.23E-08 |
|     | cgd2_3530 |          |          |          |
| 2h  | 0.00E+00  | 2.27E-09 | 2.65E-10 | 9.87E-09 |
| 6h  | 0.00E+00  | 2.45E-10 | 2.52E-09 | 4.92E-10 |
| 12h | 0.00E+00  | 3.05E-09 | 6.85E-10 | 0.00E+00 |
| 24h | 3.69E-09  | 4.31E-09 | 9.94E-10 | 5.15E-10 |
| 36h | 2.03E-08  | 5.68E-08 | 7.37E-09 | 1.52E-09 |
| 48h | 5.37E-08  | 3.54E-08 | 9.47E-09 | 4.28E-08 |
| 72h | 2.66E-08  | 6.90E-09 | 4.67E-09 | 7.12E-08 |
|     | cgd2_3540 |          |          |          |
| 2h  | 0.00E+00  | 0.00E+00 | 0.00E+00 | 4.71E-08 |
| 6h  | 3.44E-07  | 2.55E-07 | 5.52E-07 | 2.29E-08 |
| 12h | 0.00E+00  | 1.25E-07 | 1.48E-08 | 0.00E+00 |
| 24h | 3.72E-06  | 6.51E-07 | 3.00E-07 | 1.80E-08 |
| 36h | 7.07E-07  | 5.46E-06 | 1.29E-08 | 7.48E-08 |
| 48h | 5.81E-07  | 7.33E-07 | 1.54E-07 | 2.61E-06 |
| 72h | 1.24E-06  | 3.45E-07 | 4.20E-07 | 6.11E-06 |
|     | cgd2_3550 |          |          |          |
| 2h  | 1.07E-07  | 1.98E-07 | 3.18E-07 | 3.19E-07 |
| 6h  | 6.74E-07  | 2.52E-07 | 1.01E-06 | 9.11E-08 |
| 12h | 1.39E-07  | 5.31E-07 | 3.10E-07 | 3.27E-08 |

|           |          |          |          |          |
|-----------|----------|----------|----------|----------|
| 24h       | 8.20E-07 | 1.58E-07 | 6.08E-07 | 1.07E-07 |
| 36h       | 5.29E-07 | 8.81E-07 | 1.39E-07 | 1.24E-07 |
| 48h       | 4.60E-07 | 2.42E-07 | 1.81E-07 | 5.66E-07 |
| 72h       | 1.85E-07 | 5.25E-08 | 1.29E-08 | 3.54E-07 |
| cgd2_3580 |          |          |          |          |
| 2h        | 0.00E+00 | 0.00E+00 | 0.00E+00 | 4.15E-04 |
| 6h        | 3.68E-04 | 2.16E-04 | 1.62E-04 | 8.07E-05 |
| 12h       | 1.67E-04 | 2.64E-04 | 5.99E-05 | 5.73E-05 |
| 24h       | 3.14E-04 | 6.51E-05 | 4.51E-05 | 1.31E-05 |
| 36h       | 2.76E-04 | 2.84E-04 | 1.12E-04 | 1.43E-05 |
| 48h       | 2.02E-04 | 5.35E-05 | 3.74E-05 | 4.95E-05 |
| 72h       | 2.20E-04 | 1.24E-04 | 8.88E-05 | 7.83E-05 |
| cgd2_3590 |          |          |          |          |
| 2h        | 0.00E+00 | 2.59E-08 | 3.06E-08 | 2.89E-08 |
| 6h        | 8.29E-10 | 5.20E-09 | 1.08E-09 | 7.77E-10 |
| 12h       | 6.28E-09 | 2.02E-07 | 1.88E-09 | 5.26E-10 |
| 24h       | 1.50E-07 | 1.50E-08 | 1.32E-08 | 8.97E-11 |
| 36h       | 2.82E-07 | 7.55E-07 | 1.71E-08 | 2.25E-08 |
| 48h       | 1.34E-07 | 1.96E-07 | 6.79E-08 | 4.64E-07 |
| 72h       | 7.53E-07 | 1.77E-07 | 3.31E-07 | 1.80E-06 |
| cgd2_3600 |          |          |          |          |
| 2h        | 0.00E+00 | 0.00E+00 | 0.00E+00 | 0.00E+00 |
| 6h        | 9.49E-09 | 1.44E-08 | 8.80E-08 | 1.12E-09 |
| 12h       | 0.00E+00 | 2.98E-08 | 6.52E-09 | 1.92E-09 |
| 24h       | 8.22E-08 | 5.16E-08 | 3.50E-08 | 5.53E-09 |
| 36h       | 1.96E-07 | 4.22E-07 | 1.52E-08 | 2.70E-08 |
| 48h       | 6.09E-07 | 2.78E-07 | 2.84E-07 | 6.47E-07 |
| 72h       | 9.76E-06 | 1.93E-06 | 5.58E-06 | 1.18E-05 |
| cgd2_3610 |          |          |          |          |
| 2h        | 0.00E+00 | 0.00E+00 | 0.00E+00 | 0.00E+00 |
| 6h        | 0.00E+00 | 0.00E+00 | 0.00E+00 | 0.00E+00 |
| 12h       | 5.07E-09 | 3.34E-10 | 1.69E-10 | 0.00E+00 |
| 24h       | 7.46E-10 | 2.29E-10 | 1.77E-10 | 0.00E+00 |
| 36h       | 2.82E-09 | 1.11E-08 | 1.32E-10 | 3.22E-10 |
| 48h       | 2.98E-08 | 1.73E-08 | 6.13E-08 | 3.66E-08 |
| 72h       | 1.10E-06 | 2.74E-07 | 2.02E-07 | 1.22E-06 |
| cgd2_3620 |          |          |          |          |
| 2h        | 0.00E+00 | 6.13E-08 | 3.84E-07 | 0.00E+00 |
| 6h        | 0.00E+00 | 0.00E+00 | 0.00E+00 | 0.00E+00 |
| 12h       | 0.00E+00 | 6.12E-09 | 0.00E+00 | 0.00E+00 |
| 24h       | 4.99E-08 | 3.84E-09 | 6.43E-08 | 0.00E+00 |
| 36h       | 1.01E-06 | 2.03E-08 | 0.00E+00 | 0.00E+00 |
| 48h       | 2.93E-05 | 1.50E-05 | 3.53E-05 | 1.71E-06 |
| 72h       | 1.04E-03 | 1.58E-04 | 2.53E-04 | 9.69E-05 |
| cgd2_3630 |          |          |          |          |
| 2h        | 4.44E-06 | 2.37E-05 | 8.60E-05 | 2.62E-04 |
| 6h        | 5.30E-05 | 8.47E-05 | 2.44E-04 | 3.42E-05 |
| 12h       | 5.36E-06 | 1.00E-04 | 3.89E-05 | 6.64E-07 |
| 24h       | 1.91E-04 | 5.72E-05 | 2.09E-04 | 2.63E-05 |
| 36h       | 2.33E-04 | 3.01E-04 | 5.70E-05 | 7.99E-05 |
| 48h       | 1.72E-04 | 6.61E-05 | 9.57E-05 | 1.05E-04 |
| 72h       | 5.04E-04 | 6.76E-05 | 1.02E-04 | 1.25E-04 |
| cgd2_3640 |          |          |          |          |

|     |           |          |          |          |
|-----|-----------|----------|----------|----------|
| 2h  | 6.45E-07  | 2.21E-06 | 4.11E-07 | 1.11E-07 |
| 6h  | 1.36E-07  | 3.89E-07 | 9.30E-08 | 4.63E-08 |
| 12h | 3.41E-07  | 9.96E-07 | 4.03E-07 | 3.84E-08 |
| 24h | 1.56E-06  | 1.15E-06 | 3.31E-07 | 6.42E-08 |
| 36h | 5.25E-07  | 7.60E-07 | 4.67E-08 | 3.03E-08 |
| 48h | 4.30E-07  | 8.10E-07 | 1.24E-07 | 5.23E-08 |
| 72h | 7.32E-07  | 4.76E-07 | 8.02E-08 | 2.96E-07 |
|     | cgd2_3650 |          |          |          |
| 2h  | 1.37E-06  | 1.64E-06 | 1.21E-06 | 8.04E-08 |
| 6h  | 3.41E-07  | 1.38E-07 | 1.82E-07 | 5.96E-08 |
| 12h | 1.51E-06  | 2.03E-06 | 9.61E-07 | 2.80E-08 |
| 24h | 3.30E-06  | 7.19E-07 | 1.13E-06 | 2.89E-08 |
| 36h | 1.37E-06  | 1.35E-06 | 2.15E-07 | 9.02E-08 |
| 48h | 1.20E-06  | 8.57E-07 | 5.60E-07 | 1.11E-07 |
| 72h | 5.05E-06  | 1.03E-06 | 1.83E-06 | 6.57E-07 |
|     | cgd2_3660 |          |          |          |
| 2h  | 0.00E+00  | 0.00E+00 | 0.00E+00 | 0.00E+00 |
| 6h  | 0.00E+00  | 0.00E+00 | 0.00E+00 | 0.00E+00 |
| 12h | 0.00E+00  | 1.30E-09 | 0.00E+00 | 0.00E+00 |
| 24h | 1.16E-10  | 0.00E+00 | 9.48E-11 | 0.00E+00 |
| 36h | 5.84E-11  | 3.00E-10 | 0.00E+00 | 6.92E-11 |
| 48h | 9.90E-09  | 2.48E-08 | 1.32E-08 | 9.60E-10 |
| 72h | 5.56E-08  | 6.13E-08 | 8.35E-08 | 1.82E-08 |
|     | cgd2_3670 |          |          |          |
| 2h  | 0.00E+00  | 0.00E+00 | 0.00E+00 | 0.00E+00 |
| 6h  | 1.74E-08  | 0.00E+00 | 1.62E-08 | 3.84E-08 |
| 12h | 0.00E+00  | 1.26E-07 | 1.17E-07 | 0.00E+00 |
| 24h | 4.13E-07  | 1.71E-08 | 4.71E-08 | 0.00E+00 |
| 36h | 2.20E-06  | 1.95E-06 | 2.34E-08 | 2.00E-08 |
| 48h | 5.27E-07  | 1.90E-06 | 4.66E-07 | 2.07E-08 |
| 72h | 1.41E-06  | 5.40E-06 | 2.77E-06 | 4.16E-07 |
|     | cgd2_3680 |          |          |          |
| 2h  | 9.98E-07  | 8.66E-07 | 1.31E-06 | 5.16E-08 |
| 6h  | 1.22E-07  | 1.21E-07 | 5.00E-08 | 1.75E-09 |
| 12h | 3.13E-07  | 7.94E-07 | 3.41E-07 | 4.22E-08 |
| 24h | 2.60E-07  | 2.12E-07 | 1.84E-07 | 3.01E-08 |
| 36h | 4.44E-07  | 9.09E-07 | 6.10E-08 | 3.05E-08 |
| 48h | 2.79E-07  | 4.09E-07 | 1.64E-07 | 7.19E-08 |
| 72h | 3.46E-08  | 4.38E-08 | 4.74E-08 | 3.52E-08 |
|     | cgd2_3690 |          |          |          |
| 2h  | 6.08E-07  | 3.51E-07 | 5.34E-07 | 0.00E+00 |
| 6h  | 8.00E-08  | 1.01E-07 | 1.44E-07 | 0.00E+00 |
| 12h | 2.27E-08  | 1.82E-08 | 7.78E-09 | 4.79E-09 |
| 24h | 4.37E-07  | 7.19E-08 | 1.19E-07 | 5.53E-09 |
| 36h | 3.58E-07  | 3.09E-07 | 3.58E-08 | 5.31E-09 |
| 48h | 9.92E-08  | 1.92E-07 | 1.06E-07 | 1.28E-08 |
| 72h | 2.19E-07  | 1.12E-07 | 1.77E-07 | 7.59E-08 |
|     | cgd2_3750 |          |          |          |
| 2h  | 1.05E-07  | 3.59E-07 | 3.73E-07 | 3.09E-08 |
| 6h  | 0.00E+00  | 2.53E-09 | 0.00E+00 | 0.00E+00 |
| 12h | 2.14E-07  | 5.70E-07 | 2.08E-07 | 0.00E+00 |
| 24h | 8.02E-07  | 1.07E-07 | 2.95E-08 | 1.49E-09 |
| 36h | 9.21E-07  | 7.90E-07 | 2.43E-08 | 1.87E-08 |



|     |           |          |          |          |
|-----|-----------|----------|----------|----------|
| 48h | 7.45E-07  | 4.50E-07 | 1.88E-07 | 5.88E-08 |
| 72h | 1.36E-06  | 1.26E-06 | 1.05E-06 | 5.32E-07 |
|     | cgd2_3770 |          |          |          |
| 2h  | 0.00E+00  | 6.38E-09 | 0.00E+00 | 0.00E+00 |
| 6h  | 6.59E-09  | 3.88E-09 | 2.06E-08 | 7.40E-10 |
| 12h | 0.00E+00  | 4.92E-09 | 7.43E-10 | 0.00E+00 |
| 24h | 7.17E-08  | 1.26E-08 | 1.40E-08 | 9.05E-09 |
| 36h | 1.37E-07  | 6.06E-08 | 2.45E-09 | 1.25E-08 |
| 48h | 1.45E-07  | 3.02E-07 | 9.26E-08 | 6.79E-08 |
| 72h | 3.44E-07  | 4.45E-07 | 1.82E-07 | 2.57E-07 |
|     | cgd2_3780 |          |          |          |
| 2h  | 2.00E-05  | 2.04E-05 | 2.41E-05 | 6.73E-07 |
| 6h  | 1.28E-05  | 7.33E-06 | 5.87E-06 | 5.78E-07 |
| 12h | 6.73E-06  | 1.17E-05 | 2.86E-05 | 5.50E-07 |
| 24h | 1.77E-05  | 4.67E-06 | 4.63E-06 | 4.51E-07 |
| 36h | 1.12E-05  | 1.63E-05 | 3.02E-06 | 6.57E-07 |
| 48h | 1.82E-05  | 1.52E-05 | 4.48E-06 | 2.10E-06 |
| 72h | 3.70E-06  | 1.53E-06 | 3.03E-07 | 1.09E-06 |
|     | cgd2_3810 |          |          |          |
| 2h  | 0.00E+00  | 0.00E+00 | 0.00E+00 | 0.00E+00 |
| 6h  | 0.00E+00  | 0.00E+00 | 0.00E+00 | 0.00E+00 |
| 12h | 0.00E+00  | 1.96E-09 | 0.00E+00 | 0.00E+00 |
| 24h | 3.04E-10  | 0.00E+00 | 1.07E-10 | 3.61E-10 |
| 36h | 2.63E-10  | 1.16E-09 | 1.45E-10 | 5.93E-10 |
| 48h | 3.81E-08  | 1.68E-07 | 1.88E-07 | 4.74E-08 |
| 72h | 2.36E-07  | 4.01E-07 | 3.90E-07 | 4.25E-07 |
|     | cgd2_3850 |          |          |          |
| 2h  | 0.00E+00  | 0.00E+00 | 3.92E-07 | 0.00E+00 |
| 6h  | 0.00E+00  | 0.00E+00 | 6.13E-07 | 0.00E+00 |
| 12h | 2.32E-06  | 1.55E-05 | 2.82E-06 | 0.00E+00 |
| 24h | 1.10E-04  | 1.32E-05 | 1.99E-05 | 1.16E-06 |
| 36h | 2.18E-04  | 1.17E-04 | 2.42E-05 | 5.94E-06 |
| 48h | 2.23E-04  | 1.53E-04 | 4.56E-05 | 2.36E-05 |
| 72h | 2.46E-04  | 1.81E-04 | 1.55E-03 | 1.39E-04 |
|     | cgd2_3860 |          |          |          |
| 2h  | 0.00E+00  | 2.23E-08 | 0.00E+00 | 1.66E-08 |
| 6h  | 0.00E+00  | 2.44E-09 | 0.00E+00 | 0.00E+00 |
| 12h | 7.74E-09  | 4.93E-08 | 2.57E-07 | 2.56E-09 |
| 24h | 7.96E-08  | 9.27E-09 | 2.67E-09 | 2.53E-10 |
| 36h | 6.44E-07  | 2.96E-07 | 6.98E-08 | 4.31E-08 |
| 48h | 2.08E-07  | 1.84E-07 | 2.53E-07 | 1.11E-07 |
| 72h | 2.21E-07  | 4.73E-07 | 3.61E-07 | 4.84E-07 |
|     | cgd2_3870 |          |          |          |
| 2h  | 5.43E-05  | 0.00E+00 | 5.17E-04 | 0.00E+00 |
| 6h  | 3.34E-04  | 2.94E-03 | 3.68E-03 | 0.00E+00 |
| 12h | 3.75E-05  | 4.50E-04 | 3.43E-05 | 1.29E-05 |
| 24h | 6.80E-04  | 5.91E-04 | 8.13E-04 | 1.69E-06 |
| 36h | 4.95E-04  | 8.53E-03 | 3.17E-04 | 2.70E-06 |
| 48h | 2.22E-03  | 1.36E-02 | 1.52E-03 | 2.46E-05 |
| 72h | 2.65E-03  | 2.15E-03 | 1.11E-03 | 1.67E-04 |
|     | cgd2_3900 |          |          |          |
| 2h  | 0.00E+00  | 0.00E+00 | 0.00E+00 | 0.00E+00 |
| 6h  | 0.00E+00  | 4.81E-10 | 0.00E+00 | 0.00E+00 |

|     |           |          |          |          |
|-----|-----------|----------|----------|----------|
| 12h | 2.83E-08  | 6.07E-08 | 3.95E-09 | 0.00E+00 |
| 24h | 1.85E-08  | 1.11E-08 | 1.20E-08 | 0.00E+00 |
| 36h | 1.08E-07  | 1.76E-07 | 1.85E-08 | 7.18E-07 |
| 48h | 1.89E-07  | 2.82E-07 | 4.51E-08 | 1.08E-05 |
| 72h | 3.44E-07  | 5.80E-08 | 6.62E-08 | 2.80E-08 |
|     | cgd2_3930 |          |          |          |
| 2h  | 4.68E-06  | 5.39E-06 | 1.25E-05 | 3.04E-06 |
| 6h  | 4.27E-06  | 4.34E-06 | 4.38E-06 | 2.17E-06 |
| 12h | 2.80E-06  | 6.38E-06 | 1.41E-05 | 1.17E-06 |
| 24h | 8.16E-06  | 9.98E-06 | 9.28E-06 | 2.34E-06 |
| 36h | 1.26E-05  | 2.13E-05 | 2.14E-05 | 3.02E-06 |
| 48h | 3.32E-05  | 8.71E-05 | 3.29E-05 | 4.95E-06 |
| 72h | 4.55E-05  | 2.50E-05 | 6.89E-06 | 1.10E-05 |
|     | cgd2_3950 |          |          |          |
| 2h  | 5.03E-04  | 5.46E-04 | 1.89E-03 | 2.28E-04 |
| 6h  | 1.05E-02  | 3.44E-03 | 5.21E-03 | 2.08E-02 |
| 12h | 1.33E-03  | 9.59E-04 | 2.75E-04 | 8.68E-05 |
| 24h | 4.85E-03  | 5.20E-03 | 3.73E-03 | 3.34E-03 |
| 36h | 2.65E-03  | 2.94E-03 | 2.84E-03 | 7.12E-03 |
| 48h | 1.14E-03  | 2.88E-03 | 2.79E-04 | 1.18E-03 |
| 72h | 1.06E-03  | 5.47E-04 | 4.39E-04 | 1.60E-04 |
|     | cgd2_3960 |          |          |          |
| 2h  | 1.28E-04  | 8.46E-05 | 1.18E-04 | 1.51E-05 |
| 6h  | 1.93E-04  | 6.51E-05 | 1.04E-04 | 2.45E-05 |
| 12h | 1.13E-04  | 1.35E-04 | 6.08E-05 | 2.12E-05 |
| 24h | 5.43E-04  | 7.31E-05 | 1.23E-04 | 9.25E-06 |
| 36h | 1.39E-04  | 1.89E-04 | 3.31E-05 | 9.17E-06 |
| 48h | 9.83E-05  | 9.72E-05 | 5.48E-05 | 1.54E-05 |
| 72h | 9.65E-05  | 3.05E-05 | 6.21E-06 | 2.41E-05 |
|     | cgd2_3980 |          |          |          |
| 2h  | 3.14E-08  | 7.32E-08 | 1.00E-07 | 0.00E+00 |
| 6h  | 5.75E-09  | 1.33E-09 | 4.82E-09 | 5.13E-09 |
| 12h | 8.17E-07  | 2.32E-06 | 8.32E-07 | 4.26E-07 |
| 24h | 3.68E-07  | 1.17E-07 | 1.02E-07 | 1.53E-08 |
| 36h | 5.15E-07  | 8.13E-07 | 2.16E-07 | 2.96E-08 |
| 48h | 6.26E-07  | 1.10E-06 | 6.02E-07 | 1.38E-07 |
| 72h | 9.86E-07  | 3.70E-07 | 3.39E-07 | 4.94E-07 |
|     | cgd2_3990 |          |          |          |
| 2h  | 3.00E-07  | 1.34E-08 | 4.25E-06 | 0.00E+00 |
| 6h  | 8.01E-05  | 2.00E-05 | 1.14E-04 | 5.88E-06 |
| 12h | 1.64E-06  | 4.00E-06 | 1.15E-06 | 2.44E-08 |
| 24h | 1.99E-04  | 4.89E-05 | 3.90E-05 | 6.11E-07 |
| 36h | 5.70E-05  | 6.18E-05 | 7.37E-05 | 1.35E-05 |
| 48h | 7.90E-05  | 9.82E-05 | 3.18E-05 | 4.39E-06 |
| 72h | 3.22E-05  | 8.84E-06 | 2.96E-06 | 1.89E-06 |
|     | cgd2_4000 |          |          |          |
| 2h  | 2.93E-08  | 5.44E-08 | 1.01E-08 | 0.00E+00 |
| 6h  | 1.06E-08  | 1.82E-08 | 4.32E-09 | 0.00E+00 |
| 12h | 1.05E-09  | 1.25E-08 | 1.10E-08 | 0.00E+00 |
| 24h | 3.45E-08  | 9.42E-09 | 2.51E-08 | 0.00E+00 |
| 36h | 4.17E-08  | 4.56E-08 | 3.52E-08 | 1.31E-06 |
| 48h | 6.21E-08  | 2.32E-08 | 2.03E-08 | 1.63E-07 |
| 72h | 3.58E-07  | 1.56E-08 | 3.16E-08 | 0.00E+00 |

|     |           |          |          |          |
|-----|-----------|----------|----------|----------|
|     | cgd2_4030 |          |          |          |
| 2h  | 0.00E+00  | 0.00E+00 | 0.00E+00 | 0.00E+00 |
| 6h  | 0.00E+00  | 0.00E+00 | 0.00E+00 | 0.00E+00 |
| 12h | 7.62E-09  | 3.43E-08 | 5.52E-09 | 0.00E+00 |
| 24h | 1.99E-08  | 4.88E-09 | 9.82E-09 | 2.29E-09 |
| 36h | 2.61E-08  | 3.89E-08 | 1.90E-08 | 1.14E-08 |
| 48h | 3.65E-08  | 3.49E-08 | 7.93E-09 | 2.92E-09 |
| 72h | 3.21E-07  | 2.32E-07 | 1.61E-07 | 5.53E-08 |
|     | cgd2_4050 |          |          |          |
| 2h  | 0.00E+00  | 1.50E-07 | 0.00E+00 | 0.00E+00 |
| 6h  | 7.49E-08  | 1.36E-07 | 8.47E-08 | 0.00E+00 |
| 12h | 8.65E-07  | 1.72E-07 | 3.41E-08 | 0.00E+00 |
| 24h | 2.30E-07  | 1.01E-07 | 1.53E-07 | 3.59E-05 |
| 36h | 1.80E-06  | 1.75E-06 | 7.61E-07 | 0.00E+00 |
| 48h | 3.04E-05  | 2.48E-05 | 1.25E-05 | 8.20E-07 |
| 72h | 2.10E-04  | 6.54E-05 | 1.13E-04 | 9.53E-06 |
|     | cgd2_4060 |          |          |          |
| 2h  | 1.35E-07  | 6.04E-08 | 3.11E-08 | 0.00E+00 |
| 6h  | 4.22E-08  | 6.47E-09 | 5.21E-08 | 7.55E-10 |
| 12h | 7.82E-09  | 2.04E-08 | 2.98E-09 | 0.00E+00 |
| 24h | 5.17E-07  | 6.81E-08 | 5.94E-08 | 1.69E-08 |
| 36h | 7.10E-07  | 3.23E-07 | 1.83E-07 | 2.61E-09 |
| 48h | 1.55E-06  | 7.72E-07 | 3.64E-07 | 5.38E-08 |
| 72h | 4.41E-06  | 1.75E-06 | 2.14E-06 | 5.55E-07 |
|     | cgd2_4070 |          |          |          |
| 2h  | 5.53E-08  | 6.70E-09 | 3.02E-09 | 0.00E+00 |
| 6h  | 1.01E-07  | 4.38E-08 | 5.21E-08 | 1.24E-08 |
| 12h | 3.15E-09  | 1.85E-08 | 2.81E-09 | 0.00E+00 |
| 24h | 1.20E-07  | 9.11E-08 | 4.81E-08 | 9.63E-10 |
| 36h | 1.16E-07  | 2.97E-07 | 4.36E-08 | 1.51E-08 |
| 48h | 1.84E-07  | 1.25E-07 | 4.61E-08 | 1.03E-08 |
| 72h | 4.62E-07  | 5.45E-07 | 0.00E+00 | 2.04E-07 |
|     | cgd2_4090 |          |          |          |
| 2h  | 1.13E-07  | 2.28E-07 | 1.59E-07 | 4.65E-08 |
| 6h  | 5.80E-08  | 5.58E-08 | 3.71E-08 | 1.92E-09 |
| 12h | 4.63E-08  | 2.88E-07 | 4.83E-08 | 0.00E+00 |
| 24h | 7.62E-08  | 6.72E-08 | 7.72E-08 | 2.68E-08 |
| 36h | 2.49E-08  | 1.20E-07 | 1.20E-08 | 5.60E-09 |
| 48h | 7.13E-08  | 1.58E-07 | 4.78E-08 | 5.30E-08 |
| 72h | 6.48E-08  | 6.71E-08 | 4.84E-08 | 3.19E-07 |
|     | cgd2_4110 |          |          |          |
| 2h  | 3.92E-09  | 2.93E-09 | 6.48E-09 | 0.00E+00 |
| 6h  | 5.69E-07  | 1.84E-07 | 1.31E-07 | 1.34E-09 |
| 12h | 1.96E-08  | 6.29E-08 | 2.29E-09 | 6.43E-10 |
| 24h | 3.42E-07  | 3.02E-07 | 6.42E-08 | 1.88E-09 |
| 36h | 3.38E-07  | 6.27E-07 | 2.31E-08 | 7.81E-09 |
| 48h | 3.68E-07  | 8.34E-07 | 1.15E-07 | 3.38E-08 |
| 72h | 4.70E-07  | 1.70E-07 | 4.63E-08 | 1.18E-07 |
|     | cgd2_4130 |          |          |          |
| 2h  | 4.17E-10  | 0.00E+00 | 0.00E+00 | 0.00E+00 |
| 6h  | 0.00E+00  | 3.41E-11 | 0.00E+00 | 0.00E+00 |
| 12h | 3.62E-09  | 4.11E-08 | 4.16E-09 | 3.11E-10 |
| 24h | 1.11E-08  | 1.47E-08 | 1.89E-09 | 0.00E+00 |

|     |           |          |          |          |
|-----|-----------|----------|----------|----------|
| 36h | 6.32E-08  | 1.81E-07 | 5.52E-09 | 1.34E-09 |
| 48h | 2.77E-07  | 3.88E-07 | 5.92E-08 | 2.38E-08 |
| 72h | 2.14E-07  | 8.89E-08 | 4.86E-08 | 7.12E-08 |
|     | cgd2_4150 |          |          |          |
| 2h  | 2.90E-07  | 2.23E-08 | 0.00E+00 | 0.00E+00 |
| 6h  | 0.00E+00  | 0.00E+00 | 3.53E-08 | 0.00E+00 |
| 12h | 1.31E-05  | 1.30E-05 | 6.30E-06 | 3.22E-07 |
| 24h | 1.76E-06  | 2.44E-06 | 1.46E-06 | 8.86E-08 |
| 36h | 1.55E-05  | 1.61E-05 | 6.55E-06 | 1.79E-06 |
| 48h | 6.17E-06  | 8.19E-06 | 6.22E-06 | 1.63E-06 |
| 72h | 3.59E-06  | 3.29E-06 | 8.05E-07 | 2.54E-06 |
|     | cgd2_4160 |          |          |          |
| 2h  | 1.91E-05  | 2.58E-05 | 8.14E-06 | 8.44E-07 |
| 6h  | 2.62E-07  | 5.63E-07 | 4.53E-06 | 6.33E-07 |
| 12h | 1.02E-05  | 5.80E-05 | 2.43E-05 | 3.31E-06 |
| 24h | 6.62E-06  | 8.54E-06 | 3.72E-06 | 2.06E-06 |
| 36h | 8.24E-06  | 7.89E-06 | 1.57E-06 | 1.90E-06 |
| 48h | 1.12E-06  | 3.03E-06 | 2.65E-06 | 2.82E-06 |
| 72h | 4.12E-06  | 2.12E-06 | 4.48E-06 | 2.99E-06 |
|     | cgd2_4180 |          |          |          |
| 2h  | 0.00E+00  | 4.92E-08 | 2.62E-09 | 6.28E-09 |
| 6h  | 0.00E+00  | 3.23E-09 | 1.64E-09 | 3.84E-09 |
| 12h | 4.08E-07  | 1.20E-06 | 1.31E-06 | 8.56E-08 |
| 24h | 5.27E-08  | 9.72E-08 | 6.91E-08 | 1.92E-08 |
| 36h | 3.40E-07  | 4.73E-07 | 9.53E-07 | 4.61E-07 |
| 48h | 4.33E-07  | 4.06E-07 | 6.39E-07 | 2.24E-07 |
| 72h | 6.68E-08  | 1.93E-08 | 2.79E-08 | 3.64E-08 |
|     | cgd2_4190 |          |          |          |
| 2h  | 1.41E-09  | 6.28E-10 | 0.00E+00 | 0.00E+00 |
| 6h  | 1.82E-09  | 0.00E+00 | 2.50E-09 | 0.00E+00 |
| 12h | 0.00E+00  | 1.69E-09 | 1.70E-10 | 0.00E+00 |
| 24h | 1.67E-08  | 7.51E-09 | 1.10E-08 | 2.74E-10 |
| 36h | 1.25E-08  | 2.31E-08 | 3.01E-10 | 1.24E-10 |
| 48h | 1.00E-08  | 2.51E-08 | 4.44E-09 | 8.88E-10 |
| 72h | 1.88E-08  | 8.91E-09 | 3.71E-09 | 5.59E-09 |
|     | cgd2_4200 |          |          |          |
| 2h  | 1.12E-05  | 9.41E-06 | 3.12E-06 | 1.07E-06 |
| 6h  | 1.33E-05  | 6.27E-06 | 2.66E-06 | 4.37E-07 |
| 12h | 2.98E-06  | 1.85E-05 | 7.05E-06 | 3.61E-07 |
| 24h | 2.03E-05  | 8.72E-06 | 2.58E-06 | 2.95E-07 |
| 36h | 2.12E-05  | 1.86E-05 | 8.63E-07 | 8.26E-07 |
| 48h | 1.95E-05  | 2.97E-05 | 7.39E-06 | 2.70E-06 |
| 72h | 1.58E-05  | 1.61E-05 | 4.62E-06 | 9.26E-06 |
|     | cgd2_4220 |          |          |          |
| 2h  | 0.00E+00  | 0.00E+00 | 0.00E+00 | 0.00E+00 |
| 6h  | 0.00E+00  | 0.00E+00 | 0.00E+00 | 0.00E+00 |
| 12h | 2.02E-08  | 2.00E-09 | 5.01E-10 | 0.00E+00 |
| 24h | 1.03E-10  | 2.08E-09 | 7.46E-10 | 0.00E+00 |
| 36h | 6.13E-09  | 5.80E-09 | 2.39E-09 | 4.88E-10 |
| 48h | 5.02E-09  | 3.56E-09 | 5.77E-09 | 6.17E-10 |
| 72h | 8.08E-10  | 7.77E-09 | 5.84E-09 | 1.27E-08 |
|     | cgd2_4240 |          |          |          |
| 2h  | 1.38E-08  | 9.59E-08 | 2.20E-07 | 3.35E-08 |

|           |          |          |          |          |
|-----------|----------|----------|----------|----------|
| 6h        | 1.39E-07 | 1.24E-07 | 7.68E-08 | 6.72E-10 |
| 12h       | 8.63E-08 | 7.41E-08 | 4.85E-08 | 0.00E+00 |
| 24h       | 1.33E-07 | 5.95E-08 | 9.83E-08 | 4.92E-09 |
| 36h       | 4.72E-08 | 9.39E-08 | 2.14E-08 | 1.32E-09 |
| 48h       | 8.85E-08 | 1.61E-07 | 1.33E-07 | 1.10E-08 |
| 72h       | 4.81E-08 | 1.27E-08 | 3.06E-08 | 3.07E-08 |
| cgd2_4250 |          |          |          |          |
| 2h        | 0.00E+00 | 1.03E-06 | 0.00E+00 | 0.00E+00 |
| 6h        | 1.96E-08 | 6.79E-09 | 7.67E-08 | 4.37E-09 |
| 12h       | 0.00E+00 | 2.15E-09 | 3.86E-09 | 0.00E+00 |
| 24h       | 3.21E-08 | 3.05E-08 | 5.71E-09 | 7.34E-10 |
| 36h       | 4.75E-08 | 6.99E-08 | 2.07E-09 | 3.23E-09 |
| 48h       | 2.00E-08 | 5.07E-08 | 1.12E-07 | 7.55E-11 |
| 72h       | 4.77E-08 | 2.43E-08 | 1.31E-08 | 1.32E-08 |
| cgd2_4260 |          |          |          |          |
| 2h        | 2.97E-05 | 1.54E-05 | 5.05E-05 | 7.95E-07 |
| 6h        | 2.58E-04 | 2.05E-04 | 1.89E-04 | 3.77E-06 |
| 12h       | 6.39E-05 | 7.54E-05 | 1.46E-04 | 3.75E-06 |
| 24h       | 1.19E-04 | 1.25E-04 | 1.40E-04 | 8.90E-06 |
| 36h       | 3.51E-04 | 1.77E-04 | 8.79E-05 | 9.79E-06 |
| 48h       | 1.91E-05 | 3.49E-05 | 3.72E-05 | 5.35E-06 |
| 72h       | 1.34E-05 | 1.69E-05 | 9.85E-06 | 6.11E-06 |
| cgd2_4270 |          |          |          |          |
| 2h        | 0.00E+00 | 0.00E+00 | 1.34E-09 | 0.00E+00 |
| 6h        | 0.00E+00 | 8.73E-10 | 0.00E+00 | 0.00E+00 |
| 12h       | 7.71E-08 | 6.80E-07 | 3.62E-08 | 2.78E-09 |
| 24h       | 7.70E-08 | 1.02E-08 | 7.52E-09 | 2.50E-09 |
| 36h       | 2.97E-08 | 2.42E-08 | 1.31E-09 | 2.88E-09 |
| 48h       | 1.93E-08 | 2.61E-08 | 4.27E-09 | 2.43E-09 |
| 72h       | 9.34E-09 | 5.97E-09 | 5.83E-10 | 6.55E-09 |
| cgd2_4280 |          |          |          |          |
| 2h        | 0.00E+00 | 1.28E-07 | 4.94E-09 | 0.00E+00 |
| 6h        | 1.21E-06 | 9.19E-07 | 7.12E-08 | 3.00E-08 |
| 12h       | 0.00E+00 | 3.59E-07 | 5.16E-08 | 0.00E+00 |
| 24h       | 3.78E-06 | 1.44E-06 | 5.30E-07 | 5.10E-08 |
| 36h       | 7.09E-07 | 5.74E-07 | 4.20E-08 | 4.77E-08 |
| 48h       | 1.48E-06 | 8.43E-07 | 2.43E-07 | 1.09E-08 |
| 72h       | 5.77E-07 | 3.53E-07 | 1.07E-08 | 2.87E-07 |
| cgd2_4300 |          |          |          |          |
| 2h        | 4.42E-07 | 8.05E-07 | 4.20E-07 | 1.02E-07 |
| 6h        | 4.03E-07 | 2.25E-07 | 7.90E-08 | 5.94E-08 |
| 12h       | 2.69E-07 | 9.19E-07 | 2.71E-07 | 1.04E-07 |
| 24h       | 2.17E-07 | 8.10E-08 | 8.45E-08 | 5.55E-08 |
| 36h       | 1.33E-07 | 1.24E-07 | 1.83E-08 | 3.00E-08 |
| 48h       | 9.03E-08 | 1.57E-07 | 5.18E-08 | 3.56E-08 |
| 72h       | 1.29E-07 | 1.93E-08 | 2.49E-08 | 2.68E-08 |
| cgd2_4320 |          |          |          |          |
| 2h        | 4.09E-07 | 7.15E-07 | 1.65E-07 | 2.39E-08 |
| 6h        | 4.44E-07 | 2.33E-07 | 1.39E-07 | 1.54E-08 |
| 12h       | 6.21E-08 | 7.61E-07 | 2.19E-07 | 1.76E-08 |
| 24h       | 4.22E-07 | 1.65E-07 | 1.46E-07 | 1.31E-08 |
| 36h       | 1.70E-07 | 1.69E-07 | 1.55E-08 | 1.18E-08 |
| 48h       | 7.70E-08 | 2.40E-07 | 7.40E-08 | 5.52E-09 |

|     |           |          |          |          |
|-----|-----------|----------|----------|----------|
| 72h | 6.28E-08  | 6.85E-08 | 2.73E-08 | 3.74E-08 |
|     | cgd2_4330 |          |          |          |
| 2h  | 0.00E+00  | 1.79E-08 | 2.27E-08 | 7.88E-08 |
| 6h  | 1.46E-07  | 2.59E-07 | 6.96E-08 | 8.38E-08 |
| 12h | 0.00E+00  | 1.86E-09 | 1.62E-09 | 6.52E-09 |
| 24h | 1.33E-07  | 8.60E-08 | 3.93E-08 | 1.29E-07 |
| 36h | 3.59E-08  | 4.18E-08 | 3.40E-09 | 4.01E-08 |
| 48h | 1.17E-08  | 2.17E-08 | 4.55E-09 | 1.76E-08 |
| 72h | 4.20E-08  | 5.01E-08 | 2.52E-08 | 5.38E-08 |
|     | cgd2_4340 |          |          |          |
| 2h  | 0.00E+00  | 0.00E+00 | 3.77E-08 | 0.00E+00 |
| 6h  | 0.00E+00  | 0.00E+00 | 8.58E-09 | 0.00E+00 |
| 12h | 4.23E-06  | 6.59E-06 | 5.50E-07 | 4.60E-07 |
| 24h | 5.45E-07  | 5.65E-07 | 8.79E-08 | 1.35E-07 |
| 36h | 8.87E-07  | 1.11E-06 | 1.62E-07 | 7.69E-08 |
| 48h | 4.16E-06  | 3.37E-06 | 1.13E-06 | 2.67E-07 |
| 72h | 1.42E-05  | 1.46E-05 | 2.51E-06 | 8.11E-06 |
|     | cgd2_4360 |          |          |          |
| 2h  | 3.20E-09  | 6.90E-07 | 3.39E-08 | 0.00E+00 |
| 6h  | 0.00E+00  | 3.22E-09 | 0.00E+00 | 0.00E+00 |
| 12h | 2.11E-06  | 1.41E-05 | 2.01E-06 | 2.14E-07 |
| 24h | 3.48E-06  | 1.24E-06 | 2.92E-07 | 1.43E-07 |
| 36h | 4.76E-06  | 3.38E-06 | 4.58E-07 | 8.85E-07 |
| 48h | 1.41E-06  | 3.18E-06 | 6.69E-07 | 3.45E-07 |
| 72h | 1.13E-06  | 2.25E-06 | 4.00E-07 | 2.01E-06 |
|     | cgd2_4380 |          |          |          |
| 2h  | 3.18E-06  | 5.10E-06 | 8.92E-07 | 7.51E-07 |
| 6h  | 3.02E-05  | 1.85E-05 | 1.39E-05 | 3.55E-06 |
| 12h | 5.49E-06  | 1.14E-05 | 1.92E-06 | 2.75E-07 |
| 24h | 1.23E-05  | 7.48E-06 | 4.65E-06 | 1.01E-06 |
| 36h | 3.60E-06  | 3.19E-06 | 2.44E-07 | 2.89E-07 |
| 48h | 4.24E-06  | 6.69E-06 | 6.45E-07 | 4.62E-07 |
| 72h | 3.26E-07  | 7.06E-07 | 3.61E-08 | 2.59E-07 |
|     | cgd3_30   |          |          |          |
| 2h  | 3.60E-06  | 3.31E-06 | 7.51E-07 | 1.60E-06 |
| 6h  | 1.01E-05  | 9.26E-06 | 5.01E-06 | 2.23E-05 |
| 12h | 5.99E-07  | 3.07E-06 | 3.39E-06 | 2.10E-06 |
| 24h | 6.73E-06  | 3.57E-06 | 1.11E-05 | 1.03E-05 |
| 36h | 3.26E-06  | 5.64E-06 | 2.76E-06 | 2.70E-06 |
| 48h | 5.40E-06  | 1.41E-05 | 2.13E-05 | 3.75E-06 |
| 72h | 1.67E-06  | 1.63E-05 | 2.49E-06 | 2.28E-06 |
|     | cgd3_40   |          |          |          |
| 2h  | 0.00E+00  | 0.00E+00 | 0.00E+00 | 0.00E+00 |
| 6h  | 7.78E-05  | 2.31E-06 | 5.83E-07 | 1.25E-03 |
| 12h | 2.33E-05  | 2.63E-06 | 1.52E-06 | 3.02E-04 |
| 24h | 1.20E-05  | 9.80E-07 | 6.41E-06 | 1.93E-03 |
| 36h | 8.40E-05  | 2.14E-05 | 3.96E-06 | 0.00E+00 |
| 48h | 3.77E-04  | 1.16E-06 | 4.24E-07 | 1.63E-03 |
| 72h | 4.70E-05  | 2.32E-06 | 7.14E-07 | 7.72E-04 |
|     | cgd3_50   |          |          |          |
| 2h  | 5.76E-08  | 6.09E-07 | 3.32E-08 | 0.00E+00 |
| 6h  | 0.00E+00  | 0.00E+00 | 0.00E+00 | 0.00E+00 |
| 12h | 0.00E+00  | 9.46E-06 | 5.43E-07 | 0.00E+00 |

|     |          |          |          |          |
|-----|----------|----------|----------|----------|
| 24h | 2.92E-07 | 4.54E-07 | 2.10E-07 | 4.22E-09 |
| 36h | 3.10E-06 | 7.05E-06 | 2.92E-07 | 1.64E-07 |
| 48h | 3.90E-06 | 1.17E-05 | 9.28E-06 | 1.12E-07 |
| 72h | 4.14E-07 | 1.90E-06 | 7.67E-07 | 1.41E-06 |
|     | cgd3_70  |          |          |          |
| 2h  | 2.50E-05 | 3.16E-04 | 9.62E-05 | 1.39E-04 |
| 6h  | 3.30E-06 | 2.94E-05 | 0.00E+00 | 1.46E-04 |
| 12h | 7.49E-06 | 8.86E-04 | 1.89E-04 | 6.07E-05 |
| 24h | 1.54E-06 | 1.58E-04 | 1.18E-05 | 5.98E-06 |
| 36h | 1.88E-06 | 4.21E-05 | 1.22E-05 | 2.42E-06 |
| 48h | 1.01E-06 | 2.43E-05 | 3.54E-05 | 3.19E-05 |
| 72h | 3.48E-06 | 6.48E-05 | 7.38E-05 | 1.89E-05 |
|     | cgd3_80  |          |          |          |
| 2h  | 9.45E-07 | 0.00E+00 | 0.00E+00 | 0.00E+00 |
| 6h  | 0.00E+00 | 0.00E+00 | 0.00E+00 | 0.00E+00 |
| 12h | 0.00E+00 | 0.00E+00 | 0.00E+00 | 0.00E+00 |
| 24h | 2.62E-07 | 5.97E-08 | 4.90E-08 | 0.00E+00 |
| 36h | 1.06E-07 | 7.55E-07 | 2.34E-08 | 1.91E-10 |
| 48h | 3.40E-05 | 5.64E-05 | 1.39E-05 | 6.14E-07 |
| 72h | 2.74E-05 | 5.26E-06 | 5.55E-06 | 8.45E-06 |
|     | cgd3_90  |          |          |          |
| 2h  | 0.00E+00 | 0.00E+00 | 0.00E+00 | 0.00E+00 |
| 6h  | 0.00E+00 | 0.00E+00 | 0.00E+00 | 0.00E+00 |
| 12h | 0.00E+00 | 0.00E+00 | 3.53E-10 | 0.00E+00 |
| 24h | 0.00E+00 | 4.19E-11 | 0.00E+00 | 0.00E+00 |
| 36h | 2.06E-10 | 1.26E-09 | 2.09E-10 | 1.39E-10 |
| 48h | 5.58E-09 | 7.76E-09 | 4.08E-09 | 6.55E-10 |
| 72h | 5.24E-09 | 1.61E-09 | 6.40E-09 | 7.83E-09 |
|     | cgd3_100 |          |          |          |
| 2h  | 0.00E+00 | 0.00E+00 | 0.00E+00 | 0.00E+00 |
| 6h  | 0.00E+00 | 0.00E+00 | 0.00E+00 | 0.00E+00 |
| 12h | 2.77E-07 | 7.26E-08 | 2.27E-07 | 1.20E-07 |
| 24h | 3.32E-08 | 2.96E-08 | 2.25E-08 | 2.34E-08 |
| 36h | 2.83E-07 | 9.63E-08 | 2.88E-07 | 3.41E-07 |
| 48h | 2.90E-07 | 4.96E-08 | 1.12E-07 | 2.04E-07 |
| 72h | 1.13E-07 | 4.56E-08 | 3.99E-08 | 5.32E-08 |
|     | cgd3_110 |          |          |          |
| 2h  | 2.67E-05 | 4.44E-06 | 7.56E-08 | 5.52E-07 |
| 6h  | 4.55E-06 | 1.95E-06 | 7.99E-07 | 2.16E-06 |
| 12h | 2.59E-08 | 9.36E-10 | 8.32E-07 | 3.89E-07 |
| 24h | 7.98E-07 | 1.95E-07 | 7.68E-07 | 6.26E-07 |
| 36h | 3.40E-06 | 3.60E-07 | 6.28E-07 | 5.60E-07 |
| 48h | 4.75E-06 | 5.69E-07 | 2.82E-07 | 7.18E-07 |
| 72h | 9.91E-07 | 1.36E-07 | 6.38E-07 | 1.73E-07 |
|     | cgd3_140 |          |          |          |
| 2h  | 8.66E-07 | 0.00E+00 | 0.00E+00 | 0.00E+00 |
| 6h  | 2.25E-04 | 6.00E-06 | 1.90E-04 | 6.17E-07 |
| 12h | 0.00E+00 | 8.70E-07 | 4.36E-07 | 0.00E+00 |
| 24h | 3.90E-04 | 2.78E-06 | 2.46E-05 | 2.83E-07 |
| 36h | 1.78E-04 | 5.22E-05 | 7.95E-06 | 1.25E-06 |
| 48h | 3.90E-04 | 6.70E-05 | 7.15E-05 | 5.05E-06 |
| 72h | 3.16E-04 | 8.72E-06 | 5.21E-05 | 1.06E-04 |
|     | cgd3_160 |          |          |          |

|     |          |          |          |          |
|-----|----------|----------|----------|----------|
| 2h  | 6.93E-08 | 5.12E-09 | 0.00E+00 | 2.55E-09 |
| 6h  | 1.33E-08 | 3.68E-10 | 2.04E-08 | 0.00E+00 |
| 12h | 2.92E-09 | 1.68E-08 | 1.36E-08 | 0.00E+00 |
| 24h | 1.96E-08 | 6.18E-10 | 1.73E-08 | 1.60E-09 |
| 36h | 1.99E-08 | 4.42E-08 | 1.72E-08 | 8.13E-10 |
| 48h | 4.66E-08 | 5.39E-08 | 4.48E-08 | 3.96E-09 |
| 72h | 3.48E-08 | 2.28E-08 | 3.81E-08 | 3.12E-08 |
|     | cgd3_190 |          |          |          |
| 2h  | 0.00E+00 | 0.00E+00 | 1.22E-09 | 0.00E+00 |
| 6h  | 0.00E+00 | 0.00E+00 | 0.00E+00 | 0.00E+00 |
| 12h | 0.00E+00 | 0.00E+00 | 1.09E+10 | 0.00E+00 |
| 24h | 0.00E+00 | 7.29E-11 | 5.16E-10 | 0.00E+00 |
| 36h | 2.01E-08 | 6.67E-09 | 5.82E-10 | 0.00E+00 |
| 48h | 5.40E-07 | 1.66E-07 | 4.76E-07 | 1.03E-08 |
| 72h | 5.93E-05 | 2.51E-06 | 2.96E-06 | 4.41E-06 |
|     | cgd3_210 |          |          |          |
| 2h  | 6.20E-06 | 0.00E+00 | 6.85E-07 | 0.00E+00 |
| 6h  | 6.00E-05 | 1.18E-06 | 6.51E-05 | 2.32E-06 |
| 12h | 0.00E+00 | 2.73E-07 | 1.47E-06 | 0.00E+00 |
| 24h | 7.76E-05 | 2.87E-06 | 2.37E-05 | 1.15E-06 |
| 36h | 2.81E-05 | 8.24E-05 | 1.51E-05 | 1.74E-07 |
| 48h | 1.37E-05 | 1.46E-05 | 3.80E-05 | 1.18E-06 |
| 72h | 2.33E-05 | 1.37E-05 | 2.87E-05 | 3.44E-06 |
|     | cgd3_220 |          |          |          |
| 2h  | 0.00E+00 | 0.00E+00 | 0.00E+00 | 0.00E+00 |
| 6h  | 2.70E-08 | 2.47E-09 | 8.56E-10 | 0.00E+00 |
| 12h | 4.93E-09 | 1.12E-09 | 8.00E-10 | 0.00E+00 |
| 24h | 2.15E-08 | 1.65E-09 | 4.29E-09 | 5.57E-10 |
| 36h | 3.45E-08 | 4.99E-08 | 7.89E-08 | 5.03E-10 |
| 48h | 4.24E-06 | 1.53E-06 | 1.54E-06 | 2.26E-07 |
| 72h | 1.57E-06 | 3.44E-07 | 2.50E-07 | 2.87E-07 |
|     | cgd3_250 |          |          |          |
| 2h  | 2.03E-08 | 0.00E+00 | 3.33E-09 | 0.00E+00 |
| 6h  | 7.14E-07 | 5.24E-08 | 1.96E-07 | 4.15E-09 |
| 12h | 1.59E-08 | 1.61E-08 | 6.66E-08 | 0.00E+00 |
| 24h | 1.25E-06 | 5.77E-08 | 1.47E-07 | 4.97E-09 |
| 36h | 5.46E-07 | 5.96E-07 | 2.51E-08 | 2.77E-08 |
| 48h | 2.33E-06 | 3.70E-07 | 2.31E-07 | 1.81E-08 |
| 72h | 3.21E-06 | 5.69E-07 | 5.98E-07 | 2.44E-07 |
|     | cgd3_260 |          |          |          |
| 2h  | 3.54E-04 | 2.07E-04 | 1.51E-05 | 6.48E-04 |
| 6h  | 5.99E-04 | 1.04E-04 | 1.12E-04 | 5.06E-06 |
| 12h | 0.00E+00 | 6.93E-05 | 2.14E-04 | 0.00E+00 |
| 24h | 2.78E-04 | 2.05E-05 | 1.99E-04 | 7.60E-07 |
| 36h | 5.50E-05 | 1.79E-04 | 6.22E-05 | 1.62E-05 |
| 48h | 2.05E-04 | 9.12E-05 | 4.49E-05 | 3.48E-05 |
| 72h | 2.74E-05 | 4.71E-05 | 2.18E-04 | 4.51E-05 |
|     | cgd3_270 |          |          |          |
| 2h  | 0.00E+00 | 0.00E+00 | 0.00E+00 | 7.96E-08 |
| 6h  | 0.00E+00 | 0.00E+00 | 0.00E+00 | 0.00E+00 |
| 12h | 8.81E-05 | 1.76E-04 | 3.84E-04 | 1.53E-04 |
| 24h | 0.00E+00 | 6.58E-05 | 5.56E-05 | 3.60E-05 |
| 36h | 3.04E-05 | 1.67E-04 | 7.89E-04 | 2.98E-04 |



|     |          |          |          |          |
|-----|----------|----------|----------|----------|
| 48h | 3.43E-05 | 7.78E-05 | 3.55E-04 | 6.14E-05 |
| 72h | 2.52E-05 | 5.53E-05 | 8.70E-05 | 1.56E-05 |
|     | cgd3_280 |          |          |          |
| 2h  | 7.23E-08 | 4.28E-07 | 5.31E-08 | 0.00E+00 |
| 6h  | 3.45E-05 | 8.05E-05 | 1.01E-04 | 4.22E-05 |
| 12h | 3.63E-07 | 2.23E-06 | 9.50E-07 | 2.85E-06 |
| 24h | 5.35E-06 | 1.09E-04 | 6.26E-05 | 2.07E-05 |
| 36h | 0.00E+00 | 3.75E-05 | 4.04E-05 | 2.15E-05 |
| 48h | 1.27E-04 | 4.84E-05 | 4.07E-05 | 4.25E-05 |
| 72h | 9.05E-06 | 2.08E-05 | 2.83E-05 | 8.21E-06 |
|     | cgd3_300 |          |          |          |
| 2h  | 2.12E-06 | 1.75E-03 | 8.87E-05 | 7.46E-04 |
| 6h  | 1.43E-02 | 1.08E-02 | 9.39E-03 | 6.71E-02 |
| 12h | 2.90E-04 | 1.24E-04 | 1.18E-03 | 5.23E-03 |
| 24h | 2.49E-03 | 1.16E-03 | 5.38E-03 | 2.39E-02 |
| 36h | 2.34E-04 | 8.87E-04 | 6.05E-04 | 3.18E-06 |
| 48h | 3.65E-03 | 4.12E-04 | 2.49E-04 | 6.08E-07 |
| 72h | 1.75E-03 | 1.21E-03 | 7.94E-04 | 1.24E-03 |
|     | cgd3_310 |          |          |          |
| 2h  | 0.00E+00 | 0.00E+00 | 0.00E+00 | 0.00E+00 |
| 6h  | 0.00E+00 | 0.00E+00 | 0.00E+00 | 0.00E+00 |
| 12h | 1.52E-09 | 1.05E-09 | 2.89E-09 | 0.00E+00 |
| 24h | 6.62E-09 | 3.36E-11 | 1.77E-10 | 2.93E-10 |
| 36h | 2.05E-08 | 5.75E-09 | 0.00E+00 | 1.80E-10 |
| 48h | 1.18E-08 | 6.25E-09 | 3.06E-09 | 0.00E+00 |
| 72h | 6.24E-08 | 1.74E-08 | 2.35E-08 | 8.02E-09 |
|     | cgd3_330 |          |          |          |
| 2h  | 5.99E-05 | 4.94E-05 | 3.26E-03 | 2.52E-04 |
| 6h  | 1.48E-03 | 2.15E-05 | 1.48E-04 | 1.25E-04 |
| 12h | 5.33E-04 | 1.13E-04 | 1.16E-05 | 7.10E-04 |
| 24h | 6.17E-05 | 1.21E-04 | 1.50E-05 | 5.25E-04 |
| 36h | 6.53E-05 | 1.69E-04 | 1.72E-06 | 2.65E-04 |
| 48h | 3.64E-05 | 8.20E-05 | 4.40E-06 | 2.34E-04 |
| 72h | 3.41E-05 | 6.01E-05 | 1.28E-06 | 1.02E-04 |
|     | cgd3_340 |          |          |          |
| 2h  | 1.42E-08 | 0.00E+00 | 0.00E+00 | 0.00E+00 |
| 6h  | 0.00E+00 | 0.00E+00 | 0.00E+00 | 0.00E+00 |
| 12h | 7.20E-09 | 3.27E-09 | 2.40E-10 | 0.00E+00 |
| 24h | 6.96E-09 | 1.16E-09 | 1.25E-09 | 8.07E-11 |
| 36h | 3.64E-08 | 1.50E-08 | 3.57E-10 | 2.36E-09 |
| 48h | 2.23E-08 | 2.04E-08 | 5.99E-09 | 5.00E-09 |
| 72h | 3.95E-08 | 3.40E-08 | 3.94E-08 | 3.69E-08 |
|     | cgd3_350 |          |          |          |
| 2h  | 1.49E-04 | 1.04E-04 | 4.52E-04 | 5.72E-05 |
| 6h  | 2.00E-04 | 1.23E-04 | 1.01E-04 | 3.45E-05 |
| 12h | 5.50E-05 | 3.85E-05 | 7.03E-05 | 9.46E-06 |
| 24h | 3.53E-04 | 1.27E-04 | 1.49E-04 | 1.03E-04 |
| 36h | 8.36E-05 | 1.31E-04 | 4.20E-05 | 3.95E-05 |
| 48h | 2.40E-04 | 7.55E-05 | 1.58E-04 | 5.95E-05 |
| 72h | 8.10E-04 | 3.60E-04 | 2.93E-04 | 2.59E-04 |
|     | cgd3_380 |          |          |          |
| 2h  | 4.29E-07 | 0.00E+00 | 1.99E-07 | 0.00E+00 |
| 6h  | 4.09E-06 | 7.37E-07 | 2.29E-06 | 7.33E-08 |

|     |          |          |          |          |
|-----|----------|----------|----------|----------|
| 12h | 1.36E-07 | 1.43E-07 | 3.04E-07 | 1.50E-08 |
| 24h | 8.72E-06 | 2.61E-07 | 3.11E-06 | 4.79E-09 |
| 36h | 6.01E-06 | 5.54E-06 | 1.76E-07 | 8.05E-08 |
| 48h | 3.57E-06 | 1.47E-06 | 5.43E-07 | 9.33E-08 |
| 72h | 1.96E-06 | 1.61E-06 | 1.25E-06 | 2.03E-06 |
|     | cgd3_390 |          |          |          |
| 2h  | 3.45E-05 | 0.00E+00 | 4.76E-05 | 0.00E+00 |
| 6h  | 1.08E-05 | 2.66E-07 | 2.64E-06 | 0.00E+00 |
| 12h | 7.47E-05 | 4.60E-06 | 2.58E-06 | 0.00E+00 |
| 24h | 4.01E-05 | 2.33E-06 | 5.62E-06 | 8.28E-08 |
| 36h | 6.18E-05 | 9.08E-06 | 1.28E-06 | 1.07E-06 |
| 48h | 2.48E-05 | 1.13E-05 | 7.56E-06 | 4.35E-07 |
| 72h | 1.27E-04 | 4.47E-06 | 1.78E-06 | 8.00E-06 |
|     | cgd3_400 |          |          |          |
| 2h  | 2.40E-06 | 1.08E-05 | 5.76E-06 | 4.73E-05 |
| 6h  | 1.02E-06 | 4.28E-06 | 2.03E-06 | 5.27E-06 |
| 12h | 1.64E-07 | 4.95E-06 | 2.37E-06 | 3.03E-06 |
| 24h | 8.85E-07 | 3.05E-06 | 3.19E-06 | 1.98E-05 |
| 36h | 1.58E-07 | 1.11E-06 | 8.12E-07 | 8.41E-06 |
| 48h | 1.47E-06 | 4.93E-06 | 7.21E-06 | 1.02E-05 |
| 72h | 8.97E-07 | 2.20E-06 | 2.94E-06 | 6.29E-06 |
|     | cgd3_410 |          |          |          |
| 2h  | 3.22E-03 | 3.95E-04 | 1.90E-05 | 1.69E-03 |
| 6h  | 5.29E-04 | 1.17E-04 | 6.64E-06 | 2.88E-04 |
| 12h | 8.49E-04 | 7.52E-04 | 2.81E-02 | 5.18E-04 |
| 24h | 5.62E-04 | 1.09E-04 | 5.56E-06 | 1.56E-03 |
| 36h | 1.98E-04 | 5.56E-05 | 3.59E-04 | 3.12E-04 |
| 48h | 5.42E-04 | 2.05E-04 | 3.39E-06 | 9.59E-04 |
| 72h | 2.70E-05 | 3.44E-05 | 1.83E-05 | 1.02E-04 |
|     | cgd3_420 |          |          |          |
| 2h  | 1.02E-08 | 0.00E+00 | 0.00E+00 | 0.00E+00 |
| 6h  | 7.19E-08 | 5.28E-10 | 7.61E-09 | 4.52E-10 |
| 12h | 2.12E-09 | 7.82E-10 | 9.20E-10 | 1.56E-09 |
| 24h | 4.94E-08 | 1.45E-09 | 1.76E-09 | 0.00E+00 |
| 36h | 1.99E-08 | 5.54E-09 | 3.03E-10 | 2.40E-10 |
| 48h | 2.22E-08 | 1.13E-08 | 5.43E-09 | 1.27E-10 |
| 72h | 8.82E-08 | 1.21E-08 | 5.35E-09 | 1.46E-08 |
|     | cgd3_430 |          |          |          |
| 2h  | 0.00E+00 | 0.00E+00 | 0.00E+00 | 6.03E-09 |
| 6h  | 2.89E-08 | 9.28E-07 | 5.85E-07 | 1.67E-06 |
| 12h | 1.24E-08 | 2.55E-07 | 6.81E-07 | 2.29E-06 |
| 24h | 2.01E-08 | 1.11E-06 | 5.38E-07 | 2.97E-06 |
| 36h | 1.60E-07 | 1.60E-05 | 8.82E-06 | 4.25E-06 |
| 48h | 3.42E-07 | 3.29E-06 | 5.40E-06 | 4.86E-06 |
| 72h | 6.92E-07 | 3.55E-06 | 5.53E-06 | 9.49E-06 |
|     | cgd3_440 |          |          |          |
| 2h  | 3.19E-07 | 2.12E-08 | 1.34E-08 | 0.00E+00 |
| 6h  | 0.00E+00 | 0.00E+00 | 0.00E+00 | 0.00E+00 |
| 12h | 4.54E-09 | 4.49E-09 | 1.41E-10 | 0.00E+00 |
| 24h | 5.67E-08 | 3.16E-10 | 2.65E-09 | 0.00E+00 |
| 36h | 2.22E-08 | 4.51E-08 | 7.99E-10 | 0.00E+00 |
| 48h | 1.11E-06 | 2.47E-07 | 1.51E-07 | 3.49E-09 |
| 72h | 1.85E-07 | 1.23E-07 | 2.08E-08 | 8.63E-08 |

|     |          |          |          |          |
|-----|----------|----------|----------|----------|
|     | cgd3_450 |          |          |          |
| 2h  | 2.43E-07 | 5.56E-09 | 3.03E-08 | 1.16E-08 |
| 6h  | 5.52E-08 | 5.80E-09 | 5.21E-09 | 0.00E+00 |
| 12h | 8.34E-09 | 1.30E-08 | 7.70E-09 | 0.00E+00 |
| 24h | 1.05E-07 | 6.91E-09 | 1.79E-08 | 2.26E-09 |
| 36h | 5.89E-08 | 4.13E-08 | 2.90E-09 | 2.63E-09 |
| 48h | 8.62E-08 | 4.95E-08 | 1.48E-08 | 6.81E-09 |
| 72h | 6.59E-08 | 1.34E-08 | 7.49E-09 | 1.92E-08 |
|     | cgd3_460 |          |          |          |
| 2h  | 4.38E-05 | 8.65E-06 | 5.07E-06 | 3.36E-06 |
| 6h  | 2.46E-06 | 1.17E-06 | 2.87E-07 | 1.84E-06 |
| 12h | 1.73E-06 | 2.41E-06 | 4.08E-07 | 3.40E-07 |
| 24h | 5.88E-06 | 9.62E-07 | 4.76E-07 | 6.82E-07 |
| 36h | 2.89E-05 | 5.91E-06 | 9.92E-07 | 7.34E-07 |
| 48h | 1.13E-05 | 5.35E-06 | 2.76E-06 | 1.16E-06 |
| 72h | 5.56E-05 | 2.66E-05 | 1.20E-05 | 8.77E-06 |
|     | cgd3_470 |          |          |          |
| 2h  | 2.09E-03 | 7.44E-04 | 2.42E-03 | 2.25E-04 |
| 6h  | 1.94E-05 | 1.99E-05 | 2.40E-05 | 1.14E-05 |
| 12h | 2.96E-04 | 2.38E-04 | 5.00E-05 | 1.52E-05 |
| 24h | 2.10E-04 | 1.44E-05 | 1.86E-05 | 4.18E-05 |
| 36h | 4.05E-04 | 1.37E-04 | 3.72E-05 | 2.84E-05 |
| 48h | 2.45E-04 | 7.28E-05 | 4.31E-05 | 1.47E-05 |
| 72h | 7.88E-04 | 2.70E-04 | 2.17E-04 | 1.51E-04 |
|     | cgd3_480 |          |          |          |
| 2h  | 0.00E+00 | 1.82E-06 | 9.01E-06 | 3.75E-07 |
| 6h  | 0.00E+00 | 0.00E+00 | 0.00E+00 | 0.00E+00 |
| 12h | 1.95E-08 | 2.86E-07 | 1.75E-08 | 0.00E+00 |
| 24h | 4.21E-07 | 2.46E-07 | 9.71E-08 | 0.00E+00 |
| 36h | 9.71E-07 | 1.04E-06 | 3.04E-07 | 1.13E-07 |
| 48h | 1.56E-06 | 9.42E-07 | 6.89E-07 | 2.73E-08 |
| 72h | 3.85E-06 | 1.04E-06 | 2.33E-07 | 1.08E-06 |
|     | cgd3_500 |          |          |          |
| 2h  | 2.21E-06 | 8.42E-08 | 3.38E-07 | 1.06E-07 |
| 6h  | 1.90E-07 | 5.28E-10 | 1.10E-08 | 1.51E-08 |
| 12h | 4.38E-07 | 2.06E-07 | 6.86E-08 | 4.49E-08 |
| 24h | 1.27E-06 | 9.81E-08 | 3.85E-08 | 1.29E-08 |
| 36h | 5.84E-06 | 1.23E-06 | 3.59E-07 | 5.91E-08 |
| 48h | 2.20E-06 | 2.20E-06 | 4.05E-07 | 2.68E-07 |
| 72h | 3.20E-06 | 5.18E-07 | 1.97E-07 | 3.85E-07 |
|     | cgd3_510 |          |          |          |
| 2h  | 7.31E-03 | 9.28E-04 | 5.83E-03 | 7.67E-04 |
| 6h  | 1.07E-02 | 8.90E-04 | 9.53E-04 | 3.71E-04 |
| 12h | 1.72E-03 | 1.37E-03 | 3.91E-03 | 3.95E-04 |
| 24h | 7.00E-03 | 8.24E-04 | 1.74E-03 | 9.86E-04 |
| 36h | 2.86E-03 | 1.54E-03 | 9.48E-05 | 1.08E-04 |
| 48h | 4.15E-03 | 3.94E-03 | 8.37E-04 | 1.73E-04 |
| 72h | 3.12E-04 | 1.82E-04 | 1.21E-04 | 3.92E-04 |
|     | cgd3_520 |          |          |          |
| 2h  | 6.10E-08 | 2.53E-09 | 8.57E-09 | 0.00E+00 |
| 6h  | 1.33E-08 | 0.00E+00 | 0.00E+00 | 0.00E+00 |
| 12h | 6.19E-09 | 1.22E-08 | 5.11E-09 | 0.00E+00 |
| 24h | 1.42E-08 | 5.26E-10 | 5.38E-09 | 2.87E-10 |

|     |          |          |          |          |
|-----|----------|----------|----------|----------|
| 36h | 6.37E-08 | 1.57E-08 | 4.23E-09 | 2.68E-10 |
| 48h | 4.94E-07 | 2.71E-07 | 1.29E-07 | 8.76E-09 |
| 72h | 3.70E-07 | 8.87E-08 | 9.75E-09 | 8.04E-08 |
|     | cgd3_530 |          |          |          |
| 2h  | 0.00E+00 | 0.00E+00 | 0.00E+00 | 0.00E+00 |
| 6h  | 0.00E+00 | 0.00E+00 | 0.00E+00 | 0.00E+00 |
| 12h | 1.60E-06 | 8.95E-07 | 2.74E-06 | 4.55E-08 |
| 24h | 5.68E-06 | 8.44E-08 | 4.28E-07 | 4.30E-09 |
| 36h | 2.72E-05 | 8.77E-06 | 4.24E-07 | 1.10E-07 |
| 48h | 8.20E-06 | 4.48E-06 | 2.39E-06 | 2.33E-07 |
| 72h | 3.47E-06 | 1.54E-06 | 2.73E-07 | 4.11E-06 |
|     | cgd3_560 |          |          |          |
| 2h  | 0.00E+00 | 0.00E+00 | 0.00E+00 | 0.00E+00 |
| 6h  | 0.00E+00 | 4.35E-09 | 0.00E+00 | 0.00E+00 |
| 12h | 1.22E-05 | 1.12E-05 | 6.00E-06 | 4.30E-06 |
| 24h | 1.69E-04 | 1.37E-06 | 9.59E-07 | 6.70E-08 |
| 36h | 4.76E-04 | 4.02E-05 | 1.19E-05 | 7.95E-06 |
| 48h | 2.23E-05 | 2.68E-05 | 3.10E-05 | 1.26E-06 |
| 72h | 1.58E-05 | 7.96E-06 | 1.17E-06 | 4.88E-06 |
|     | cgd3_570 |          |          |          |
| 2h  | 0.00E+00 | 0.00E+00 | 0.00E+00 | 0.00E+00 |
| 6h  | 2.51E-05 | 2.44E-06 | 2.30E-06 | 1.11E-05 |
| 12h | 8.20E-06 | 6.41E-06 | 7.50E-06 | 4.11E-05 |
| 24h | 3.79E-06 | 2.84E-06 | 5.69E-07 | 1.33E-05 |
| 36h | 5.94E-05 | 8.76E-06 | 1.30E-05 | 2.25E-06 |
| 48h | 1.71E-04 | 5.74E-06 | 3.08E-06 | 2.34E-06 |
| 72h | 6.00E-05 | 1.82E-06 | 1.36E-06 | 7.29E-06 |
|     | cgd3_580 |          |          |          |
| 2h  | 0.00E+00 | 0.00E+00 | 0.00E+00 | 0.00E+00 |
| 6h  | 0.00E+00 | 0.00E+00 | 0.00E+00 | 0.00E+00 |
| 12h | 5.72E-05 | 6.92E-06 | 4.88E-06 | 0.00E+00 |
| 24h | 1.06E-04 | 7.26E-07 | 1.20E-07 | 0.00E+00 |
| 36h | 8.58E-05 | 1.36E-05 | 6.25E-07 | 1.20E-06 |
| 48h | 1.50E-04 | 1.82E-06 | 2.39E-08 | 1.38E-07 |
| 72h | 3.72E-04 | 9.77E-07 | 1.77E-07 | 4.94E-07 |
|     | cgd3_590 |          |          |          |
| 2h  | 1.87E-08 | 0.00E+00 | 0.00E+00 | 0.00E+00 |
| 6h  | 1.10E-06 | 7.59E-08 | 1.91E-07 | 1.18E-08 |
| 12h | 6.03E-08 | 1.18E-07 | 2.73E-07 | 0.00E+00 |
| 24h | 1.86E-06 | 1.39E-07 | 6.83E-07 | 0.00E+00 |
| 36h | 1.17E-06 | 3.26E-06 | 5.94E-08 | 7.19E-09 |
| 48h | 2.23E-06 | 1.95E-06 | 1.03E-06 | 1.06E-07 |
| 72h | 1.49E-06 | 7.62E-07 | 8.15E-07 | 4.44E-07 |
|     | cgd3_600 |          |          |          |
| 2h  | 4.34E-09 | 0.00E+00 | 0.00E+00 | 0.00E+00 |
| 6h  | 0.00E+00 | 0.00E+00 | 0.00E+00 | 0.00E+00 |
| 12h | 4.68E-08 | 1.40E-08 | 1.60E-08 | 8.37E-09 |
| 24h | 9.52E-08 | 8.14E-09 | 1.84E-08 | 0.00E+00 |
| 36h | 3.21E-07 | 4.43E-07 | 2.54E-09 | 3.29E-10 |
| 48h | 2.15E-07 | 1.90E-07 | 3.84E-08 | 5.34E-09 |
| 72h | 5.49E-08 | 2.43E-08 | 1.51E-08 | 1.05E-08 |
|     | cgd3_610 |          |          |          |
| 2h  | 4.65E-06 | 1.98E-06 | 6.81E-07 | 9.43E-07 |

|     |          |          |          |          |
|-----|----------|----------|----------|----------|
| 6h  | 3.44E-07 | 1.94E-07 | 2.02E-07 | 8.64E-08 |
| 12h | 2.29E-07 | 9.16E-07 | 1.93E-06 | 4.41E-07 |
| 24h | 7.33E-07 | 4.48E-07 | 2.62E-07 | 2.47E-07 |
| 36h | 6.53E-07 | 9.32E-07 | 2.35E-07 | 4.02E-07 |
| 48h | 3.92E-07 | 3.79E-07 | 1.28E-07 | 1.89E-07 |
| 72h | 9.24E-08 | 4.12E-08 | 2.11E-08 | 5.80E-08 |
|     | cgd3_620 |          |          |          |
| 2h  | 0.00E+00 | 0.00E+00 | 0.00E+00 | 0.00E+00 |
| 6h  | 1.74E-06 | 0.00E+00 | 0.00E+00 | 0.00E+00 |
| 12h | 6.67E-05 | 1.11E-05 | 1.94E-05 | 0.00E+00 |
| 24h | 1.34E-04 | 1.41E-06 | 1.12E-06 | 0.00E+00 |
| 36h | 2.88E-04 | 2.74E-04 | 5.83E-07 | 1.18E-06 |
| 48h | 1.96E-04 | 1.15E-04 | 1.75E-05 | 2.66E-06 |
| 72h | 3.53E-04 | 6.93E-06 | 2.56E-05 | 1.75E-05 |
|     | cgd3_630 |          |          |          |
| 2h  | 5.58E-06 | 0.00E+00 | 0.00E+00 | 0.00E+00 |
| 6h  | 0.00E+00 | 0.00E+00 | 0.00E+00 | 0.00E+00 |
| 12h | 8.26E-06 | 5.32E-05 | 5.40E-05 | 0.00E+00 |
| 24h | 2.37E-04 | 7.82E-06 | 1.89E-05 | 0.00E+00 |
| 36h | 1.32E-03 | 5.50E-04 | 2.27E-05 | 5.17E-06 |
| 48h | 5.91E-04 | 3.21E-04 | 2.05E-04 | 8.33E-07 |
| 72h | 5.15E-04 | 3.19E-05 | 3.29E-05 | 5.37E-05 |
|     | cgd3_640 |          |          |          |
| 2h  | 3.10E-07 | 4.00E-08 | 1.48E-07 | 2.16E-08 |
| 6h  | 1.92E-07 | 2.77E-08 | 1.56E-08 | 2.06E-08 |
| 12h | 6.87E-08 | 4.79E-08 | 4.28E-08 | 1.59E-08 |
| 24h | 1.73E-07 | 4.21E-08 | 5.82E-08 | 1.60E-08 |
| 36h | 1.26E-07 | 1.83E-07 | 6.56E-08 | 6.97E-08 |
| 48h | 2.09E-07 | 1.25E-07 | 3.20E-08 | 3.39E-08 |
| 72h | 1.94E-07 | 1.28E-07 | 3.06E-08 | 3.01E-07 |
|     | cgd3_660 |          |          |          |
| 2h  | 4.95E-08 | 0.00E+00 | 2.53E-06 | 3.29E-08 |
| 6h  | 1.12E-07 | 8.32E-09 | 1.71E-08 | 7.76E-08 |
| 12h | 2.96E-08 | 4.09E-08 | 1.13E-07 | 0.00E+00 |
| 24h | 7.79E-07 | 1.13E-07 | 1.07E-07 | 2.03E-09 |
| 36h | 2.03E-06 | 2.04E-06 | 1.47E-07 | 8.28E-07 |
| 48h | 1.66E-06 | 1.50E-06 | 7.19E-07 | 1.40E-07 |
| 72h | 1.20E-06 | 4.74E-07 | 2.22E-07 | 1.15E-06 |
|     | cgd3_670 |          |          |          |
| 2h  | 4.01E-07 | 6.13E-08 | 3.54E-07 | 0.00E+00 |
| 6h  | 3.02E-06 | 3.64E-07 | 3.92E-07 | 1.08E-07 |
| 12h | 5.96E-08 | 7.59E-08 | 1.73E-07 | 1.23E-08 |
| 24h | 2.25E-06 | 2.80E-07 | 8.06E-07 | 2.29E-07 |
| 36h | 9.74E-07 | 9.86E-07 | 6.26E-08 | 4.63E-08 |
| 48h | 2.49E-06 | 3.71E-06 | 5.94E-07 | 1.16E-07 |
| 72h | 4.31E-07 | 4.06E-07 | 1.10E-07 | 6.05E-07 |
|     | cgd3_680 |          |          |          |
| 2h  | 1.14E-08 | 0.00E+00 | 0.00E+00 | 0.00E+00 |
| 6h  | 1.27E-09 | 2.04E-10 | 0.00E+00 | 0.00E+00 |
| 12h | 0.00E+00 | 0.00E+00 | 6.25E-10 | 0.00E+00 |
| 24h | 6.59E-09 | 1.43E-10 | 1.86E-09 | 0.00E+00 |
| 36h | 1.69E-08 | 5.39E-09 | 8.48E-11 | 0.00E+00 |
| 48h | 7.45E-08 | 2.11E-07 | 1.09E-08 | 6.64E-10 |

|     |          |          |          |          |
|-----|----------|----------|----------|----------|
| 72h | 5.95E-07 | 1.51E-07 | 5.85E-08 | 1.45E-07 |
|     | cgd3_710 |          |          |          |
| 2h  | 0.00E+00 | 0.00E+00 | 0.00E+00 | 0.00E+00 |
| 6h  | 0.00E+00 | 0.00E+00 | 0.00E+00 | 0.00E+00 |
| 12h | 1.21E-07 | 2.03E-08 | 9.69E-09 | 0.00E+00 |
| 24h | 2.03E-08 | 1.68E-10 | 2.22E-09 | 5.66E-10 |
| 36h | 1.25E-07 | 3.57E-08 | 1.56E-09 | 2.48E-10 |
| 48h | 3.33E-07 | 1.05E-08 | 7.82E-09 | 3.18E-09 |
| 72h | 3.80E-08 | 3.43E-09 | 0.00E+00 | 5.84E-09 |
|     | cgd3_720 |          |          |          |
| 2h  | 0.00E+00 | 0.00E+00 | 0.00E+00 | 0.00E+00 |
| 6h  | 0.00E+00 | 0.00E+00 | 0.00E+00 | 0.00E+00 |
| 12h | 0.00E+00 | 0.00E+00 | 0.00E+00 | 0.00E+00 |
| 24h | 5.54E-10 | 0.00E+00 | 0.00E+00 | 0.00E+00 |
| 36h | 0.00E+00 | 6.43E-09 | 0.00E+00 | 0.00E+00 |
| 48h | 7.27E-06 | 5.81E-06 | 1.34E-06 | 3.49E-08 |
| 72h | 1.84E-06 | 6.93E-08 | 1.90E-07 | 5.10E-07 |
|     | cgd3_730 |          |          |          |
| 2h  | 3.49E-04 | 8.84E-06 | 2.84E-05 | 1.90E-04 |
| 6h  | 7.26E-04 | 7.60E-06 | 1.44E-05 | 1.33E-04 |
| 12h | 1.04E-05 | 6.12E-05 | 1.87E-05 | 0.00E+00 |
| 24h | 3.86E-04 | 1.61E-05 | 1.75E-04 | 3.53E-05 |
| 36h | 1.78E-04 | 7.43E-05 | 5.61E-05 | 9.29E-05 |
| 48h | 3.50E-04 | 2.81E-04 | 1.72E-05 | 1.77E-04 |
| 72h | 5.28E-04 | 1.01E-04 | 2.43E-05 | 7.78E-05 |
|     | cgd3_740 |          |          |          |
| 2h  | 0.00E+00 | 1.23E-08 | 0.00E+00 | 0.00E+00 |
| 6h  | 0.00E+00 | 0.00E+00 | 0.00E+00 | 0.00E+00 |
| 12h | 6.06E-09 | 2.88E-08 | 3.63E-08 | 5.05E-09 |
| 24h | 3.12E-08 | 1.23E-08 | 1.23E-08 | 6.53E-09 |
| 36h | 2.66E-08 | 2.15E-08 | 1.80E-08 | 5.19E-08 |
| 48h | 9.85E-08 | 8.67E-08 | 4.14E-08 | 6.80E-08 |
| 72h | 2.85E-08 | 3.18E-08 | 1.36E-08 | 6.89E-08 |
|     | cgd3_750 |          |          |          |
| 2h  | 7.24E-07 | 2.67E-08 | 1.07E-07 | 1.89E-08 |
| 6h  | 7.37E-08 | 2.65E-08 | 4.82E-08 | 2.32E-08 |
| 12h | 5.72E-07 | 6.08E-08 | 8.90E-08 | 6.17E-08 |
| 24h | 2.54E-07 | 9.82E-08 | 9.22E-08 | 1.76E-07 |
| 36h | 2.96E-07 | 1.96E-07 | 3.12E-08 | 1.78E-07 |
| 48h | 5.78E-07 | 2.07E-07 | 1.34E-07 | 8.50E-08 |
| 72h | 1.96E-07 | 8.79E-08 | 1.71E-08 | 3.65E-07 |
|     | cgd3_760 |          |          |          |
| 2h  | 9.28E-09 | 6.13E-09 | 6.34E-08 | 2.36E-08 |
| 6h  | 1.74E-07 | 3.38E-08 | 1.35E-08 | 2.19E-09 |
| 12h | 7.99E-07 | 1.41E-08 | 1.83E-08 | 1.18E-05 |
| 24h | 2.69E-07 | 2.71E-08 | 6.35E-08 | 1.23E-08 |
| 36h | 1.89E-07 | 8.47E-08 | 2.61E-08 | 2.02E-08 |
| 48h | 1.65E-07 | 1.10E-07 | 2.82E-08 | 9.20E-09 |
| 72h | 8.12E-08 | 2.71E-08 | 1.33E-08 | 1.39E-07 |
|     | cgd3_770 |          |          |          |
| 2h  | 0.00E+00 | 0.00E+00 | 1.63E-09 | 0.00E+00 |
| 6h  | 2.40E-08 | 1.94E-08 | 1.92E-08 | 2.71E-09 |
| 12h | 0.00E+00 | 5.18E-10 | 7.21E-10 | 0.00E+00 |

|          |          |          |          |          |
|----------|----------|----------|----------|----------|
| 24h      | 7.20E-08 | 3.52E-09 | 2.16E-08 | 0.00E+00 |
| 36h      | 7.57E-08 | 3.46E-08 | 2.81E-09 | 3.32E-09 |
| 48h      | 7.88E-08 | 1.96E-08 | 2.11E-08 | 1.71E-09 |
| 72h      | 2.12E-08 | 1.19E-08 | 2.24E-09 | 3.83E-08 |
| cgd3_790 |          |          |          |          |
| 2h       | 1.13E-05 | 0.00E+00 | 2.56E-05 | 0.00E+00 |
| 6h       | 6.71E-05 | 1.37E-06 | 3.36E-06 | 2.22E-05 |
| 12h      | 4.50E-06 | 3.37E-07 | 4.63E-06 | 0.00E+00 |
| 24h      | 7.20E-05 | 2.21E-06 | 3.69E-06 | 0.00E+00 |
| 36h      | 2.34E-05 | 2.24E-05 | 9.15E-07 | 2.85E-06 |
| 48h      | 6.57E-05 | 1.05E-05 | 1.10E-06 | 3.14E-06 |
| 72h      | 2.73E-05 | 1.08E-05 | 4.20E-06 | 1.19E-05 |
| cgd3_800 |          |          |          |          |
| 2h       | 9.60E-08 | 7.83E-08 | 2.26E-07 | 2.36E-08 |
| 6h       | 2.69E-07 | 1.23E-08 | 2.85E-08 | 1.60E-08 |
| 12h      | 4.03E-07 | 1.95E-07 | 1.96E-07 | 2.14E-08 |
| 24h      | 4.08E-07 | 4.88E-08 | 1.03E-07 | 2.04E-08 |
| 36h      | 6.02E-07 | 4.39E-07 | 1.16E-07 | 5.13E-08 |
| 48h      | 6.97E-07 | 3.15E-07 | 8.76E-08 | 3.71E-08 |
| 72h      | 4.38E-07 | 3.74E-07 | 1.30E-07 | 6.45E-07 |
| cgd3_810 |          |          |          |          |
| 2h       | 0.00E+00 | 0.00E+00 | 0.00E+00 | 0.00E+00 |
| 6h       | 0.00E+00 | 0.00E+00 | 3.97E-09 | 0.00E+00 |
| 12h      | 1.56E-07 | 6.23E-08 | 2.27E-07 | 0.00E+00 |
| 24h      | 2.64E-07 | 3.27E-09 | 4.40E-08 | 1.00E-09 |
| 36h      | 2.66E-07 | 2.71E-07 | 1.65E-08 | 5.18E-10 |
| 48h      | 3.37E-07 | 7.66E-08 | 5.55E-08 | 3.88E-08 |
| 72h      | 2.73E-07 | 2.42E-08 | 6.10E-08 | 4.53E-08 |
| cgd3_850 |          |          |          |          |
| 2h       | 0.00E+00 | 1.40E-08 | 6.11E-10 | 0.00E+00 |
| 6h       | 5.08E-09 | 1.96E-09 | 3.12E-09 | 1.69E-09 |
| 12h      | 4.33E-08 | 1.90E-08 | 5.41E-09 | 2.48E-08 |
| 24h      | 1.12E-08 | 2.00E-09 | 4.79E-09 | 1.11E-08 |
| 36h      | 4.21E-08 | 2.78E-08 | 1.44E-08 | 3.30E-08 |
| 48h      | 2.88E-08 | 7.88E-09 | 1.12E-08 | 1.45E-08 |
| 72h      | 9.67E-08 | 2.93E-08 | 1.18E-08 | 5.65E-08 |
| cgd3_860 |          |          |          |          |
| 2h       | 0.00E+00 | 0.00E+00 | 0.00E+00 | 0.00E+00 |
| 6h       | 1.23E-08 | 1.91E-08 | 1.12E-07 | 1.25E-08 |
| 12h      | 2.33E-08 | 5.08E-09 | 1.99E-09 | 0.00E+00 |
| 24h      | 4.60E-08 | 9.72E-09 | 9.59E-08 | 4.14E-08 |
| 36h      | 1.12E-07 | 1.54E-07 | 8.68E-08 | 1.10E-07 |
| 48h      | 1.33E-07 | 1.52E-07 | 8.37E-08 | 2.75E-08 |
| 72h      | 1.35E-07 | 6.45E-08 | 1.68E-08 | 8.99E-08 |
| cgd3_880 |          |          |          |          |
| 2h       | 1.25E-08 | 5.41E-09 | 0.00E+00 | 0.00E+00 |
| 6h       | 0.00E+00 | 8.75E-10 | 8.87E-10 | 1.08E-09 |
| 12h      | 4.20E-08 | 1.34E-07 | 6.25E-08 | 1.04E-07 |
| 24h      | 1.23E-08 | 8.24E-09 | 1.24E-08 | 3.26E-08 |
| 36h      | 4.83E-08 | 4.07E-08 | 4.40E-08 | 6.04E-08 |
| 48h      | 2.02E-08 | 2.20E-08 | 2.95E-08 | 3.00E-08 |
| 72h      | 2.39E-08 | 3.33E-08 | 2.62E-08 | 1.66E-08 |
| cgd3_890 |          |          |          |          |

|     |           |          |          |          |
|-----|-----------|----------|----------|----------|
| 2h  | 2.88E-06  | 3.85E-06 | 1.04E-05 | 1.10E-06 |
| 6h  | 2.87E-07  | 3.19E-08 | 2.17E-07 | 1.16E-07 |
| 12h | 9.78E-08  | 2.02E-06 | 8.77E-07 | 7.40E-07 |
| 24h | 5.20E-06  | 6.66E-07 | 2.97E-06 | 5.73E-07 |
| 36h | 5.56E-06  | 3.93E-06 | 4.99E-07 | 9.59E-07 |
| 48h | 5.26E-06  | 6.33E-06 | 1.38E-06 | 2.20E-06 |
| 72h | 3.93E-06  | 3.65E-06 | 3.55E-07 | 4.02E-06 |
|     | cgd3_930  |          |          |          |
| 2h  | 2.75E-07  | 0.00E+00 | 2.26E-06 | 2.67E-08 |
| 6h  | 4.35E-08  | 1.05E-07 | 1.33E-07 | 2.74E-08 |
| 12h | 7.72E-07  | 3.85E-07 | 3.60E-07 | 5.36E-08 |
| 24h | 5.85E-07  | 5.70E-08 | 1.55E-07 | 1.07E-08 |
| 36h | 8.40E-07  | 2.59E-06 | 2.27E-08 | 2.22E-08 |
| 48h | 7.05E-07  | 1.28E-06 | 1.65E-06 | 1.00E-07 |
| 72h | 5.80E-05  | 1.85E-05 | 1.43E-05 | 3.56E-05 |
|     | cgd3_950  |          |          |          |
| 2h  | 0.00E+00  | 0.00E+00 | 0.00E+00 | 0.00E+00 |
| 6h  | 7.65E-09  | 0.00E+00 | 0.00E+00 | 0.00E+00 |
| 12h | 8.18E-09  | 4.06E-10 | 8.06E-10 | 0.00E+00 |
| 24h | 2.05E-07  | 8.92E-10 | 3.13E-09 | 2.55E-10 |
| 36h | 1.99E-07  | 1.25E-07 | 1.47E-09 | 5.50E-09 |
| 48h | 1.34E-06  | 2.43E-07 | 9.40E-08 | 1.34E-08 |
| 72h | 3.21E-06  | 5.60E-07 | 6.86E-07 | 2.90E-07 |
|     | cgd3_960  |          |          |          |
| 2h  | 0.00E+00  | 0.00E+00 | 0.00E+00 | 0.00E+00 |
| 6h  | 2.24E-09  | 0.00E+00 | 7.48E-10 | 6.41E-10 |
| 12h | 5.05E-09  | 2.88E-09 | 1.22E-09 | 0.00E+00 |
| 24h | 2.75E-08  | 1.79E-09 | 7.85E-09 | 2.12E-09 |
| 36h | 8.96E-08  | 3.94E-08 | 7.17E-09 | 3.21E-09 |
| 48h | 1.05E-07  | 3.91E-08 | 1.44E-08 | 1.47E-08 |
| 72h | 1.32E-06  | 9.25E-08 | 1.26E-07 | 1.59E-07 |
|     | cgd3_970  |          |          |          |
| 2h  | 9.25E-09  | 2.16E-09 | 0.00E+00 | 0.00E+00 |
| 6h  | 2.27E-08  | 0.00E+00 | 0.00E+00 | 0.00E+00 |
| 12h | 3.70E-08  | 6.72E-09 | 5.60E-09 | 0.00E+00 |
| 24h | 5.52E-08  | 2.05E-09 | 8.04E-09 | 6.13E-10 |
| 36h | 2.15E-07  | 1.22E-07 | 1.65E-08 | 7.84E-09 |
| 48h | 1.48E-07  | 8.95E-08 | 2.88E-08 | 2.16E-08 |
| 72h | 1.00E-06  | 7.10E-08 | 1.71E-07 | 1.33E-07 |
|     | cgd3_980  |          |          |          |
| 2h  | 5.86E-07  | 1.28E-07 | 5.23E-07 | 4.25E-07 |
| 6h  | 2.63E-07  | 8.11E-08 | 6.78E-08 | 6.16E-08 |
| 12h | 1.02E-08  | 1.77E-07 | 1.81E-07 | 3.79E-07 |
| 24h | 2.46E-07  | 3.30E-08 | 9.69E-08 | 4.45E-08 |
| 36h | 1.74E-07  | 1.42E-07 | 1.15E-07 | 1.32E-07 |
| 48h | 3.08E-07  | 2.25E-07 | 1.00E-07 | 9.84E-08 |
| 72h | 9.86E-07  | 6.05E-08 | 1.46E-07 | 2.57E-07 |
|     | cgd3_1010 |          |          |          |
| 2h  | 0.00E+00  | 0.00E+00 | 0.00E+00 | 0.00E+00 |
| 6h  | 9.36E-08  | 1.95E-07 | 1.38E-07 | 8.88E-08 |
| 12h | 0.00E+00  | 0.00E+00 | 8.40E-09 | 1.21E-07 |
| 24h | 2.89E-07  | 5.22E-07 | 1.65E-06 | 1.32E-06 |
| 36h | 5.09E-08  | 2.28E-07 | 5.22E-07 | 1.04E-06 |



|     |           |          |          |          |
|-----|-----------|----------|----------|----------|
| 48h | 8.29E-08  | 7.02E-07 | 1.82E-07 | 8.80E-08 |
| 72h | 5.24E-08  | 6.84E-07 | 1.58E-07 | 6.60E-07 |
|     | cgd3_1030 |          |          |          |
| 2h  | 7.80E-08  | 0.00E+00 | 3.82E-07 | 0.00E+00 |
| 6h  | 7.99E-07  | 1.45E-07 | 5.44E-07 | 3.23E-08 |
| 12h | 0.00E+00  | 2.71E-08 | 3.80E-08 | 0.00E+00 |
| 24h | 7.75E-07  | 7.56E-08 | 8.59E-07 | 9.19E-09 |
| 36h | 5.71E-07  | 6.24E-07 | 1.08E-07 | 1.45E-08 |
| 48h | 9.85E-07  | 1.19E-06 | 2.20E-07 | 3.48E-08 |
| 72h | 2.07E-06  | 5.32E-07 | 4.08E-07 | 4.85E-07 |
|     | cgd3_1060 |          |          |          |
| 2h  | 0.00E+00  | 1.30E-08 | 0.00E+00 | 0.00E+00 |
| 6h  | 2.23E-08  | 3.77E-08 | 1.26E-08 | 1.45E-08 |
| 12h | 9.75E-09  | 6.44E-10 | 0.00E+00 | 0.00E+00 |
| 24h | 3.98E-08  | 1.81E-09 | 2.28E-08 | 1.88E-09 |
| 36h | 1.85E-08  | 1.87E-08 | 5.29E-09 | 1.73E-08 |
| 48h | 4.01E-08  | 3.59E-08 | 5.80E-09 | 4.08E-09 |
| 72h | 7.66E-08  | 2.35E-08 | 2.24E-08 | 4.32E-08 |
|     | cgd3_1070 |          |          |          |
| 2h  | 1.88E-08  | 1.95E-09 | 0.00E+00 | 0.00E+00 |
| 6h  | 1.59E-08  | 7.88E-09 | 1.79E-08 | 9.76E-09 |
| 12h | 1.55E-08  | 3.35E-09 | 4.54E-10 | 3.83E-09 |
| 24h | 2.08E-08  | 3.12E-09 | 1.04E-08 | 6.22E-09 |
| 36h | 7.50E-09  | 3.20E-09 | 2.24E-09 | 2.16E-09 |
| 48h | 2.36E-08  | 7.84E-09 | 5.96E-09 | 1.62E-08 |
| 72h | 5.39E-08  | 4.74E-09 | 1.14E-08 | 1.42E-08 |
|     | cgd3_1160 |          |          |          |
| 2h  | 1.57E-07  | 9.32E-09 | 7.37E-08 | 6.60E-08 |
| 6h  | 0.00E+00  | 1.17E-08 | 0.00E+00 | 0.00E+00 |
| 12h | 1.89E-07  | 2.40E-07 | 2.09E-07 | 6.25E-08 |
| 24h | 6.13E-08  | 1.68E-08 | 7.35E-09 | 6.90E-10 |
| 36h | 3.16E-08  | 3.89E-08 | 1.84E-08 | 1.81E-08 |
| 48h | 3.50E-08  | 1.56E-08 | 2.28E-08 | 1.08E-08 |
| 72h | 2.11E-08  | 1.67E-08 | 9.29E-09 | 2.69E-08 |
|     | cgd3_1200 |          |          |          |
| 2h  | 5.82E-08  | 1.97E-08 | 3.59E-08 | 1.83E-08 |
| 6h  | 2.98E-08  | 8.18E-08 | 6.86E-08 | 7.77E-08 |
| 12h | 1.33E-08  | 4.02E-08 | 7.63E-10 | 3.29E-08 |
| 24h | 1.31E-08  | 2.34E-08 | 3.42E-08 | 1.29E-07 |
| 36h | 3.19E-08  | 1.01E-08 | 6.63E-08 | 5.27E-08 |
| 48h | 3.57E-08  | 2.40E-08 | 1.76E-08 | 3.42E-08 |
| 72h | 2.15E-08  | 1.17E-08 | 1.69E-08 | 1.59E-08 |
|     | cgd3_1210 |          |          |          |
| 2h  | 0.00E+00  | 0.00E+00 | 4.23E-07 | 0.00E+00 |
| 6h  | 1.20E-07  | 2.64E-08 | 2.41E-08 | 8.81E-09 |
| 12h | 1.16E-07  | 0.00E+00 | 8.13E-09 | 0.00E+00 |
| 24h | 8.31E-08  | 6.61E-09 | 1.58E-08 | 4.91E-08 |
| 36h | 9.84E-08  | 3.24E-08 | 3.98E-09 | 1.28E-08 |
| 48h | 7.19E-08  | 3.88E-08 | 1.11E-08 | 1.04E-08 |
| 72h | 5.02E-08  | 2.69E-08 | 2.96E-08 | 3.23E-08 |
|     | cgd3_1220 |          |          |          |
| 2h  | 5.25E-07  | 2.58E-07 | 5.69E-07 | 1.79E-07 |
| 6h  | 7.03E-06  | 8.47E-07 | 1.29E-06 | 8.12E-07 |

|     |           |          |          |          |
|-----|-----------|----------|----------|----------|
| 12h | 1.79E-06  | 8.31E-07 | 5.72E-07 | 5.66E-07 |
| 24h | 3.64E-06  | 5.50E-07 | 9.87E-07 | 5.92E-07 |
| 36h | 1.69E-06  | 8.21E-07 | 2.51E-07 | 8.39E-07 |
| 48h | 1.34E-06  | 4.54E-07 | 1.30E-07 | 3.58E-07 |
| 72h | 1.18E-06  | 8.78E-08 | 3.76E-08 | 1.56E-07 |
|     | cgd3_1230 |          |          |          |
| 2h  | 1.27E-05  | 1.82E-06 | 6.94E-06 | 1.50E-05 |
| 6h  | 9.73E-05  | 7.74E-06 | 8.76E-06 | 2.00E-05 |
| 12h | 4.97E-06  | 5.12E-06 | 2.54E-06 | 7.02E-07 |
| 24h | 1.07E-04  | 7.08E-06 | 1.12E-05 | 2.49E-06 |
| 36h | 1.18E-05  | 9.94E-06 | 7.36E-07 | 1.55E-06 |
| 48h | 4.34E-05  | 1.27E-05 | 7.45E-06 | 2.64E-06 |
| 72h | 1.91E-05  | 4.48E-06 | 2.88E-06 | 5.40E-06 |
|     | cgd3_1250 |          |          |          |
| 2h  | 3.37E-03  | 1.09E-03 | 3.31E-04 | 2.26E-03 |
| 6h  | 1.43E-02  | 1.72E-03 | 9.39E-04 | 5.37E-03 |
| 12h | 1.86E-03  | 6.93E-04 | 4.40E-04 | 8.76E-03 |
| 24h | 9.34E-03  | 3.42E-03 | 3.06E-03 | 7.22E-03 |
| 36h | 2.23E-03  | 1.67E-04 | 4.79E-04 | 9.72E-04 |
| 48h | 4.35E-04  | 6.69E-04 | 2.68E-04 | 6.10E-04 |
| 72h | 6.33E-04  | 1.07E-04 | 9.50E-05 | 2.73E-04 |
|     | cgd3_1270 |          |          |          |
| 2h  | 0.00E+00  | 5.96E-07 | 0.00E+00 | 0.00E+00 |
| 6h  | 2.56E-05  | 8.74E-07 | 2.04E-06 | 4.04E-07 |
| 12h | 1.22E-06  | 7.25E-09 | 6.82E-08 | 0.00E+00 |
| 24h | 4.75E-06  | 3.93E-07 | 6.15E-07 | 5.04E-07 |
| 36h | 6.34E-06  | 2.50E-06 | 1.97E-07 | 2.14E-06 |
| 48h | 8.60E-06  | 9.55E-07 | 4.08E-06 | 3.05E-07 |
| 72h | 7.93E-06  | 1.21E-06 | 2.53E-07 | 1.32E-06 |
|     | cgd3_1290 |          |          |          |
| 2h  | 0.00E+00  | 0.00E+00 | 0.00E+00 | 0.00E+00 |
| 6h  | 1.31E-06  | 6.91E-07 | 1.04E-06 | 1.61E-06 |
| 12h | 3.56E-08  | 6.67E-08 | 3.70E-08 | 3.94E-09 |
| 24h | 4.52E-06  | 4.38E-07 | 7.97E-07 | 1.04E-06 |
| 36h | 1.84E-06  | 7.64E-07 | 1.65E-06 | 1.33E-06 |
| 48h | 2.07E-06  | 9.28E-07 | 1.62E-06 | 6.93E-07 |
| 72h | 1.45E-07  | 1.26E-07 | 5.46E-08 | 2.04E-07 |
|     | cgd3_1300 |          |          |          |
| 2h  | 1.02E-05  | 1.20E-06 | 1.27E-06 | 1.13E-06 |
| 6h  | 9.19E-05  | 2.12E-05 | 2.24E-06 | 4.12E-06 |
| 12h | 7.28E-06  | 2.64E-06 | 1.87E-06 | 1.79E-06 |
| 24h | 5.66E-05  | 3.26E-06 | 3.96E-06 | 4.53E-06 |
| 36h | 1.23E-05  | 2.44E-06 | 2.47E-06 | 1.11E-06 |
| 48h | 1.21E-05  | 2.80E-06 | 1.28E-06 | 1.04E-06 |
| 72h | 1.10E-06  | 4.71E-07 | 1.57E-07 | 4.42E-07 |
|     | cgd3_1310 |          |          |          |
| 2h  | 0.00E+00  | 0.00E+00 | 5.52E-08 | 0.00E+00 |
| 6h  | 1.61E-06  | 3.90E-07 | 1.50E-07 | 1.05E-06 |
| 12h | 2.09E-06  | 6.79E-08 | 5.70E-08 | 0.00E+00 |
| 24h | 2.50E-05  | 1.79E-07 | 3.03E-06 | 1.36E-06 |
| 36h | 1.27E-05  | 2.30E-06 | 1.38E-06 | 5.03E-07 |
| 48h | 6.02E-06  | 3.42E-06 | 2.44E-06 | 1.27E-06 |
| 72h | 4.33E-06  | 3.52E-07 | 7.27E-07 | 7.18E-07 |

|     |           |          |          |          |
|-----|-----------|----------|----------|----------|
|     | cgd3_1320 |          |          |          |
| 2h  | 0.00E+00  | 2.18E-09 | 0.00E+00 | 0.00E+00 |
| 6h  | 2.06E-08  | 2.87E-09 | 5.79E-09 | 4.64E-09 |
| 12h | 0.00E+00  | 3.70E-09 | 1.65E-09 | 0.00E+00 |
| 24h | 6.33E-08  | 9.65E-09 | 8.06E-09 | 7.21E-09 |
| 36h | 8.06E-08  | 1.52E-08 | 3.29E-09 | 4.94E-09 |
| 48h | 2.73E-08  | 1.88E-08 | 6.68E-09 | 6.77E-09 |
| 72h | 3.63E-07  | 6.55E-09 | 5.08E-09 | 1.67E-08 |
|     | cgd3_1330 |          |          |          |
| 2h  | 0.00E+00  | 0.00E+00 | 0.00E+00 | 0.00E+00 |
| 6h  | 0.00E+00  | 0.00E+00 | 0.00E+00 | 0.00E+00 |
| 12h | 2.05E-08  | 4.72E-09 | 1.23E-09 | 0.00E+00 |
| 24h | 1.40E-09  | 2.97E-10 | 2.98E-09 | 6.15E-10 |
| 36h | 1.05E-08  | 1.08E-08 | 1.72E-10 | 8.72E-10 |
| 48h | 6.56E-09  | 3.61E-09 | 1.27E-09 | 7.44E-10 |
| 72h | 1.95E-09  | 2.27E-09 | 5.58E-09 | 3.31E-09 |
|     | cgd3_1340 |          |          |          |
| 2h  | 8.07E-05  | 1.74E-06 | 1.56E-05 | 1.02E-07 |
| 6h  | 1.13E-05  | 4.81E-08 | 2.32E-07 | 7.05E-08 |
| 12h | 1.19E-05  | 3.72E-06 | 5.79E-06 | 2.26E-07 |
| 24h | 1.83E-05  | 6.98E-07 | 5.25E-06 | 1.19E-07 |
| 36h | 1.50E-05  | 3.61E-06 | 2.18E-07 | 2.83E-07 |
| 48h | 1.48E-05  | 2.50E-06 | 1.26E-06 | 3.78E-07 |
| 72h | 5.80E-06  | 4.73E-07 | 2.99E-07 | 4.18E-07 |
|     | cgd3_1350 |          |          |          |
| 2h  | 0.00E+00  | 0.00E+00 | 2.10E-08 | 0.00E+00 |
| 6h  | 1.00E-03  | 4.67E-08 | 1.48E-07 | 4.79E-09 |
| 12h | 1.48E-07  | 1.47E-09 | 2.12E-08 | 0.00E+00 |
| 24h | 1.27E-06  | 1.39E-08 | 3.11E-07 | 5.15E-09 |
| 36h | 4.51E-07  | 2.31E-07 | 2.29E-08 | 1.11E-09 |
| 48h | 8.12E-07  | 2.16E-07 | 9.32E-08 | 1.08E-08 |
| 72h | 2.13E-07  | 2.73E-08 | 2.83E-08 | 3.31E-08 |
|     | cgd3_1360 |          |          |          |
| 2h  | 0.00E+00  | 5.64E-07 | 0.00E+00 | 0.00E+00 |
| 6h  | 1.23E-05  | 1.72E-06 | 2.12E-06 | 4.60E-06 |
| 12h | 3.41E-04  | 2.44E-06 | 1.10E-05 | 0.00E+00 |
| 24h | 2.39E-04  | 1.72E-06 | 7.71E-06 | 1.37E-07 |
| 36h | 7.76E-04  | 7.29E-05 | 1.00E-05 | 3.30E-05 |
| 48h | 9.70E-04  | 6.45E-05 | 3.43E-05 | 6.04E-06 |
| 72h | 5.20E-04  | 1.37E-04 | 1.14E-05 | 2.04E-04 |
|     | cgd3_1370 |          |          |          |
| 2h  | 0.00E+00  | 0.00E+00 | 0.00E+00 | 0.00E+00 |
| 6h  | 0.00E+00  | 0.00E+00 | 0.00E+00 | 0.00E+00 |
| 12h | 1.84E-06  | 1.21E-07 | 1.39E-07 | 0.00E+00 |
| 24h | 1.26E-07  | 7.75E-08 | 7.47E-08 | 2.80E-08 |
| 36h | 3.06E-07  | 8.39E-07 | 7.96E-08 | 2.15E-07 |
| 48h | 6.42E-06  | 9.64E-06 | 6.06E-06 | 7.42E-07 |
| 72h | 1.89E-07  | 8.30E-07 | 1.21E-06 | 8.53E-07 |
|     | cgd3_1380 |          |          |          |
| 2h  | 0.00E+00  | 0.00E+00 | 5.48E-09 | 0.00E+00 |
| 6h  | 9.11E-08  | 2.13E-08 | 1.93E-09 | 2.26E-08 |
| 12h | 1.23E-08  | 1.21E-08 | 5.83E-09 | 1.89E-08 |
| 24h | 2.58E-07  | 1.52E-08 | 4.54E-08 | 1.08E-08 |

|     |           |          |          |          |
|-----|-----------|----------|----------|----------|
| 36h | 1.06E-07  | 6.42E-08 | 1.62E-08 | 1.40E-08 |
| 48h | 8.57E-08  | 4.34E-08 | 3.65E-08 | 1.28E-08 |
| 72h | 1.18E-07  | 5.56E-08 | 7.58E-09 | 1.39E-08 |
|     | cgd3_1390 |          |          |          |
| 2h  | 2.45E-07  | 3.12E-08 | 3.27E-07 | 1.02E-08 |
| 6h  | 1.26E-06  | 6.93E-08 | 2.20E-07 | 2.93E-08 |
| 12h | 1.15E-07  | 3.47E-08 | 8.48E-08 | 1.02E-09 |
| 24h | 1.35E-06  | 1.96E-08 | 9.05E-08 | 2.06E-08 |
| 36h | 4.60E-07  | 4.50E-07 | 2.94E-08 | 2.17E-08 |
| 48h | 2.23E-07  | 1.74E-07 | 8.35E-08 | 1.25E-08 |
| 72h | 1.44E-07  | 6.80E-08 | 4.10E-08 | 7.46E-08 |
|     | cgd3_1400 |          |          |          |
| 2h  | 1.21E-08  | 0.00E+00 | 0.00E+00 | 0.00E+00 |
| 6h  | 0.00E+00  | 0.00E+00 | 3.10E-10 | 0.00E+00 |
| 12h | 1.39E-08  | 1.30E-08 | 3.06E-08 | 0.00E+00 |
| 24h | 7.04E-09  | 7.09E-10 | 1.14E-09 | 1.53E-09 |
| 36h | 3.40E-08  | 3.74E-08 | 7.37E-10 | 3.25E-10 |
| 48h | 4.05E-08  | 3.61E-08 | 7.38E-08 | 3.34E-10 |
| 72h | 1.93E-07  | 2.29E-07 | 4.36E-08 | 3.68E-08 |
|     | cgd3_1420 |          |          |          |
| 2h  | 0.00E+00  | 0.00E+00 | 2.87E-09 | 0.00E+00 |
| 6h  | 1.09E-08  | 2.32E-08 | 1.01E-08 | 4.09E-08 |
| 12h | 1.30E-08  | 2.96E-09 | 4.98E-09 | 0.00E+00 |
| 24h | 2.92E-08  | 5.35E-09 | 6.16E-09 | 4.18E-08 |
| 36h | 3.07E-08  | 2.27E-08 | 5.62E-09 | 1.76E-08 |
| 48h | 8.93E-08  | 7.16E-08 | 3.32E-08 | 1.86E-08 |
| 72h | 3.22E-07  | 7.70E-08 | 3.26E-08 | 1.20E-07 |
|     | cgd3_1440 |          |          |          |
| 2h  | 4.43E-07  | 2.01E-07 | 5.87E-08 | 1.61E-08 |
| 6h  | 1.90E-07  | 4.36E-08 | 2.67E-08 | 2.35E-09 |
| 12h | 2.07E-08  | 2.02E-08 | 2.25E-08 | 1.77E-09 |
| 24h | 1.38E-07  | 1.41E-08 | 1.85E-08 | 2.72E-09 |
| 36h | 3.41E-07  | 9.16E-08 | 0.00E+00 | 1.24E-09 |
| 48h | 3.08E-07  | 1.14E-07 | 5.77E-08 | 5.00E-09 |
| 72h | 2.65E-07  | 1.46E-07 | 7.85E-08 | 1.68E-07 |
|     | cgd3_1490 |          |          |          |
| 2h  | 0.00E+00  | 0.00E+00 | 0.00E+00 | 0.00E+00 |
| 6h  | 4.26E-07  | 0.00E+00 | 1.85E-07 | 0.00E+00 |
| 12h | 0.00E+00  | 2.31E-08 | 6.91E-09 | 0.00E+00 |
| 24h | 2.49E-06  | 2.18E-07 | 1.68E-07 | 6.17E-07 |
| 36h | 7.30E-07  | 1.68E-06 | 3.28E-07 | 2.05E-07 |
| 48h | 2.04E-06  | 4.46E-06 | 7.38E-07 | 3.92E-07 |
| 72h | 1.53E-06  | 1.17E-06 | 3.47E-07 | 1.40E-06 |
|     | cgd3_1510 |          |          |          |
| 2h  | 1.98E-08  | 3.67E-09 | 5.08E-09 | 0.00E+00 |
| 6h  | 2.15E-07  | 4.48E-09 | 1.98E-08 | 1.03E-08 |
| 12h | 1.03E-08  | 0.00E+00 | 1.63E-09 | 0.00E+00 |
| 24h | 2.92E-08  | 4.82E-09 | 1.93E-08 | 6.86E-09 |
| 36h | 3.38E-08  | 2.45E-08 | 1.31E-09 | 3.65E-09 |
| 48h | 2.78E-08  | 1.84E-08 | 1.58E-08 | 8.65E-10 |
| 72h | 4.86E-08  | 1.84E-08 | 1.47E-08 | 1.95E-08 |
|     | cgd3_1520 |          |          |          |
| 2h  | 7.70E-08  | 1.94E-07 | 1.77E-07 | 3.07E-08 |

|           |          |          |          |          |
|-----------|----------|----------|----------|----------|
| 6h        | 0.00E+00 | 0.00E+00 | 0.00E+00 | 0.00E+00 |
| 12h       | 0.00E+00 | 2.04E-09 | 1.72E-09 | 0.00E+00 |
| 24h       | 2.81E-08 | 1.11E-09 | 3.46E-10 | 1.44E-09 |
| 36h       | 4.16E-09 | 1.65E-09 | 0.00E+00 | 0.00E+00 |
| 48h       | 1.50E-08 | 2.77E-08 | 1.79E-08 | 2.17E-09 |
| 72h       | 6.83E-07 | 7.45E-07 | 1.59E-06 | 1.97E-04 |
| cgd3_1540 |          |          |          |          |
| 2h        | 6.16E-08 | 0.00E+00 | 0.00E+00 | 0.00E+00 |
| 6h        | 0.00E+00 | 0.00E+00 | 0.00E+00 | 0.00E+00 |
| 12h       | 0.00E+00 | 1.74E-09 | 0.00E+00 | 0.00E+00 |
| 24h       | 7.42E-09 | 0.00E+00 | 0.00E+00 | 0.00E+00 |
| 36h       | 5.65E-09 | 5.45E-09 | 0.00E+00 | 0.00E+00 |
| 48h       | 5.25E-06 | 1.53E-06 | 1.18E-06 | 1.83E-08 |
| 72h       | 3.43E-05 | 8.75E-06 | 1.07E-05 | 4.09E-06 |
| cgd3_1560 |          |          |          |          |
| 2h        | 2.80E-05 | 2.34E-06 | 4.66E-06 | 4.82E-07 |
| 6h        | 6.49E-06 | 8.72E-07 | 1.80E-06 | 4.55E-07 |
| 12h       | 5.12E-06 | 1.02E-06 | 3.13E-06 | 4.41E-07 |
| 24h       | 1.65E-05 | 1.71E-06 | 6.19E-06 | 1.57E-06 |
| 36h       | 1.27E-05 | 4.67E-06 | 5.99E-07 | 1.31E-06 |
| 48h       | 2.62E-06 | 7.79E-06 | 2.98E-06 | 2.08E-06 |
| 72h       | 2.52E-06 | 4.79E-07 | 1.03E-06 | 1.12E-06 |
| cgd3_1570 |          |          |          |          |
| 2h        | 4.59E-06 | 3.99E-06 | 9.53E-07 | 3.08E-06 |
| 6h        | 2.41E-07 | 2.57E-07 | 8.15E-08 | 1.46E-07 |
| 12h       | 7.03E-05 | 5.51E-05 | 2.74E-05 | 5.03E-05 |
| 24h       | 3.64E-06 | 4.59E-06 | 2.97E-06 | 4.20E-06 |
| 36h       | 9.12E-06 | 6.06E-06 | 4.85E-06 | 7.66E-06 |
| 48h       | 3.15E-06 | 3.94E-06 | 1.49E-06 | 5.34E-06 |
| 72h       | 3.87E-07 | 1.09E-06 | 2.79E-07 | 9.01E-07 |
| cgd3_1590 |          |          |          |          |
| 2h        | 2.27E-06 | 1.53E-07 | 7.22E-07 | 9.17E-08 |
| 6h        | 6.32E-07 | 4.60E-09 | 4.65E-09 | 7.80E-09 |
| 12h       | 3.02E-07 | 3.30E-07 | 5.57E-07 | 1.18E-08 |
| 24h       | 1.30E-06 | 2.98E-08 | 2.02E-07 | 4.28E-08 |
| 36h       | 2.60E-07 | 1.07E-07 | 9.56E-09 | 2.25E-08 |
| 48h       | 1.40E-07 | 7.53E-08 | 4.50E-08 | 4.88E-08 |
| 72h       | 1.39E-07 | 5.61E-08 | 2.66E-08 | 9.44E-08 |
| cgd3_1650 |          |          |          |          |
| 2h        | 2.22E-05 | 2.94E-06 | 2.57E-05 | 2.48E-07 |
| 6h        | 1.10E-04 | 2.80E-05 | 3.86E-05 | 5.87E-06 |
| 12h       | 9.25E-06 | 1.94E-06 | 2.36E-05 | 3.18E-06 |
| 24h       | 2.41E-04 | 7.43E-06 | 6.01E-05 | 5.10E-06 |
| 36h       | 3.50E-05 | 2.13E-05 | 2.20E-06 | 2.23E-06 |
| 48h       | 2.14E-05 | 5.36E-06 | 5.47E-06 | 8.35E-07 |
| 72h       | 9.17E-06 | 3.93E-06 | 6.97E-07 | 3.77E-06 |
| cgd3_1660 |          |          |          |          |
| 2h        | 0.00E+00 | 2.67E-09 | 0.00E+00 | 0.00E+00 |
| 6h        | 3.13E-09 | 7.01E-10 | 1.48E-09 | 7.88E-10 |
| 12h       | 5.47E-09 | 9.68E-10 | 7.37E-10 | 5.01E-09 |
| 24h       | 3.86E-08 | 6.27E-10 | 6.22E-10 | 4.07E-09 |
| 36h       | 3.87E-08 | 8.33E-09 | 9.73E-09 | 5.26E-09 |
| 48h       | 5.56E-08 | 1.94E-08 | 8.72E-09 | 1.55E-08 |

|     |           |          |          |          |
|-----|-----------|----------|----------|----------|
| 72h | 2.92E-07  | 2.17E-08 | 1.44E-08 | 5.63E-08 |
|     | cgd3_1690 |          |          |          |
| 2h  | 0.00E+00  | 0.00E+00 | 1.69E-07 | 0.00E+00 |
| 6h  | 0.00E+00  | 0.00E+00 | 0.00E+00 | 0.00E+00 |
| 12h | 1.57E-05  | 8.41E-06 | 3.95E-05 | 1.15E-07 |
| 24h | 4.00E-05  | 1.78E-07 | 1.51E-06 | 3.62E-07 |
| 36h | 9.03E-05  | 2.35E-05 | 3.69E-06 | 2.22E-06 |
| 48h | 4.65E-05  | 9.22E-06 | 9.30E-06 | 1.79E-06 |
| 72h | 2.35E-05  | 4.58E-06 | 2.32E-06 | 6.04E-06 |
|     | cgd3_1710 |          |          |          |
| 2h  | 1.57E-05  | 0.00E+00 | 0.00E+00 | 0.00E+00 |
| 6h  | 0.00E+00  | 0.00E+00 | 0.00E+00 | 0.00E+00 |
| 12h | 2.34E-03  | 2.37E-04 | 2.36E-04 | 1.15E-04 |
| 24h | 4.01E-04  | 2.32E-05 | 3.40E-05 | 1.34E-04 |
| 36h | 6.07E-04  | 7.11E-05 | 1.34E-04 | 1.23E-04 |
| 48h | 1.25E-04  | 1.17E-04 | 2.85E-05 | 1.09E-04 |
| 72h | 1.59E-04  | 1.52E-05 | 2.54E-05 | 2.86E-05 |
|     | cgd3_1730 |          |          |          |
| 2h  | 0.00E+00  | 0.00E+00 | 3.84E-09 | 0.00E+00 |
| 6h  | 2.29E-09  | 2.21E-09 | 2.62E-09 | 0.00E+00 |
| 12h | 1.30E-07  | 2.76E-07 | 2.85E-07 | 1.68E-07 |
| 24h | 3.14E-07  | 1.50E-08 | 4.52E-08 | 2.16E-08 |
| 36h | 3.96E-07  | 1.95E-07 | 3.33E-08 | 7.45E-08 |
| 48h | 1.12E-07  | 5.70E-08 | 3.32E-08 | 2.21E-08 |
| 72h | 1.94E-07  | 8.19E-08 | 2.01E-08 | 3.33E-08 |
|     | cgd3_1740 |          |          |          |
| 2h  | 2.70E-04  | 7.15E-07 | 4.00E-07 | 0.00E+00 |
| 6h  | 0.00E+00  | 0.00E+00 | 0.00E+00 | 0.00E+00 |
| 12h | 1.10E-05  | 4.52E-05 | 4.01E-04 | 0.00E+00 |
| 24h | 1.66E-04  | 1.66E-06 | 2.52E-05 | 1.02E-07 |
| 36h | 1.18E-04  | 8.60E-05 | 1.13E-05 | 1.48E-06 |
| 48h | 2.08E-04  | 5.52E-05 | 2.45E-05 | 6.24E-07 |
| 72h | 1.59E-05  | 6.93E-06 | 1.39E-06 | 4.39E-06 |
|     | cgd3_1750 |          |          |          |
| 2h  | 1.60E-06  | 3.06E-08 | 4.85E-07 | 0.00E+00 |
| 6h  | 0.00E+00  | 0.00E+00 | 0.00E+00 | 0.00E+00 |
| 12h | 2.30E-07  | 6.19E-07 | 3.33E-06 | 1.10E-08 |
| 24h | 5.73E-07  | 1.74E-08 | 1.23E-07 | 6.30E-09 |
| 36h | 2.26E-06  | 1.24E-06 | 5.27E-07 | 1.18E-07 |
| 48h | 6.56E-07  | 2.82E-07 | 1.18E-07 | 3.99E-08 |
| 72h | 5.96E-06  | 1.93E-07 | 5.65E-08 | 1.44E-07 |
|     | cgd3_1780 |          |          |          |
| 2h  | 0.00E+00  | 0.00E+00 | 0.00E+00 | 0.00E+00 |
| 6h  | 0.00E+00  | 0.00E+00 | 0.00E+00 | 0.00E+00 |
| 12h | 1.65E-07  | 1.09E-07 | 6.65E-08 | 2.50E-10 |
| 24h | 1.10E-07  | 8.06E-11 | 2.67E-09 | 8.63E-10 |
| 36h | 5.73E-08  | 2.81E-08 | 1.73E-08 | 4.88E-09 |
| 48h | 4.19E-08  | 2.15E-08 | 1.26E-08 | 6.02E-10 |
| 72h | 3.05E-07  | 4.16E-08 | 7.12E-09 | 5.30E-08 |
|     | cgd3_1790 |          |          |          |
| 2h  | 5.44E-08  | 0.00E+00 | 4.74E-08 | 3.09E-09 |
| 6h  | 2.47E-07  | 2.74E-08 | 4.11E-07 | 4.56E-10 |
| 12h | 5.02E-09  | 6.24E-09 | 2.37E-08 | 0.00E+00 |

|     |           |          |          |          |
|-----|-----------|----------|----------|----------|
| 24h | 1.04E-06  | 1.55E-08 | 1.14E-07 | 1.49E-09 |
| 36h | 5.27E-07  | 5.22E-07 | 1.54E-08 | 7.02E-09 |
| 48h | 3.73E-07  | 1.64E-07 | 2.03E-07 | 1.26E-08 |
| 72h | 4.15E-07  | 2.62E-07 | 8.29E-08 | 3.59E-07 |
|     | cgd3_1810 |          |          |          |
| 2h  | 7.58E-07  | 6.42E-08 | 2.53E-07 | 8.62E-09 |
| 6h  | 7.45E-07  | 1.54E-07 | 4.15E-07 | 7.69E-08 |
| 12h | 4.48E-08  | 3.30E-08 | 1.79E-07 | 1.01E-08 |
| 24h | 5.15E-07  | 5.66E-08 | 4.68E-07 | 6.43E-08 |
| 36h | 7.48E-07  | 5.46E-07 | 1.14E-07 | 6.52E-08 |
| 48h | 6.05E-07  | 5.37E-07 | 4.50E-07 | 1.04E-07 |
| 72h | 1.50E-07  | 2.14E-07 | 8.16E-08 | 1.90E-07 |
|     | cgd3_1830 |          |          |          |
| 2h  | 5.58E-09  | 5.77E-09 | 9.79E-09 | 0.00E+00 |
| 6h  | 1.89E-09  | 0.00E+00 | 1.91E-09 | 0.00E+00 |
| 12h | 3.67E-09  | 0.00E+00 | 1.38E-08 | 0.00E+00 |
| 24h | 2.08E-08  | 0.00E+00 | 3.99E-09 | 0.00E+00 |
| 36h | 8.28E-08  | 7.42E-08 | 0.00E+00 | 8.02E-10 |
| 48h | 1.83E-07  | 4.56E-08 | 3.68E-08 | 1.87E-09 |
| 72h | 1.73E-06  | 2.02E-07 | 3.56E-08 | 3.18E-07 |
|     | cgd3_1840 |          |          |          |
| 2h  | 1.03E-08  | 4.34E-09 | 1.53E-07 | 1.03E-08 |
| 6h  | 4.41E-08  | 4.29E-08 | 3.50E-07 | 2.86E-08 |
| 12h | 2.73E-09  | 3.24E-08 | 2.78E-08 | 0.00E+00 |
| 24h | 2.31E-09  | 5.07E-08 | 5.10E-07 | 1.73E-08 |
| 36h | 3.82E-09  | 5.11E-07 | 1.16E-08 | 5.42E-09 |
| 48h | 8.47E-07  | 6.16E-07 | 2.55E-07 | 3.32E-08 |
| 72h | 5.41E-08  | 3.75E-07 | 1.72E-07 | 7.34E-07 |
|     | cgd3_1850 |          |          |          |
| 2h  | 1.21E-05  | 2.06E-05 | 4.32E-05 | 6.31E-05 |
| 6h  | 2.17E-06  | 2.76E-05 | 8.13E-06 | 4.77E-06 |
| 12h | 2.53E-05  | 1.14E-05 | 1.07E-05 | 1.71E-05 |
| 24h | 2.05E-06  | 1.44E-06 | 1.99E-05 | 8.60E-06 |
| 36h | 2.51E-06  | 5.77E-06 | 1.37E-06 | 7.53E-06 |
| 48h | 1.50E-05  | 7.87E-06 | 3.73E-06 | 3.74E-06 |
| 72h | 2.30E-06  | 5.36E-06 | 1.49E-06 | 1.09E-05 |
|     | cgd3_1860 |          |          |          |
| 2h  | 0.00E+00  | 7.52E-09 | 0.00E+00 | 0.00E+00 |
| 6h  | 0.00E+00  | 7.67E-09 | 0.00E+00 | 0.00E+00 |
| 12h | 0.00E+00  | 0.00E+00 | 1.22E-10 | 0.00E+00 |
| 24h | 0.00E+00  | 2.88E-10 | 4.25E-10 | 0.00E+00 |
| 36h | 0.00E+00  | 6.28E-09 | 1.27E-10 | 0.00E+00 |
| 48h | 1.36E-07  | 2.18E-08 | 2.18E-08 | 2.38E-09 |
| 72h | 2.15E-08  | 3.46E-08 | 2.46E-08 | 7.10E-08 |
|     | cgd3_1870 |          |          |          |
| 2h  | 2.92E-08  | 2.16E-08 | 6.58E-08 | 0.00E+00 |
| 6h  | 3.42E-08  | 5.11E-08 | 9.92E-08 | 4.09E-08 |
| 12h | 3.39E-08  | 1.45E-08 | 2.39E-08 | 4.06E-08 |
| 24h | 1.47E-08  | 1.42E-08 | 8.51E-08 | 1.45E-08 |
| 36h | 3.42E-08  | 7.35E-08 | 4.42E-08 | 7.87E-08 |
| 48h | 2.37E-07  | 7.97E-08 | 7.69E-08 | 2.39E-08 |
| 72h | 7.02E-08  | 7.11E-08 | 4.35E-08 | 3.65E-07 |
|     | cgd3_1880 |          |          |          |

|     |           |          |          |          |
|-----|-----------|----------|----------|----------|
| 2h  | 0.00E+00  | 0.00E+00 | 3.42E-09 | 0.00E+00 |
| 6h  | 4.83E-10  | 0.00E+00 | 9.64E-10 | 5.93E-09 |
| 12h | 0.00E+00  | 0.00E+00 | 0.00E+00 | 0.00E+00 |
| 24h | 4.70E-10  | 1.03E-10 | 1.56E-09 | 0.00E+00 |
| 36h | 3.26E-09  | 8.81E-09 | 1.77E-09 | 8.63E-10 |
| 48h | 4.01E-08  | 2.64E-08 | 1.03E-08 | 7.04E-09 |
| 72h | 1.40E-08  | 1.97E-08 | 1.78E-08 | 6.50E-08 |
|     | cgd3_1890 |          |          |          |
| 2h  | 0.00E+00  | 0.00E+00 | 1.20E-09 | 0.00E+00 |
| 6h  | 9.73E-09  | 0.00E+00 | 3.15E-08 | 2.06E-09 |
| 12h | 1.50E-09  | 2.00E-09 | 6.03E-09 | 0.00E+00 |
| 24h | 6.33E-10  | 8.35E-10 | 1.27E-08 | 2.65E-09 |
| 36h | 1.18E-08  | 2.63E-08 | 4.83E-09 | 8.63E-09 |
| 48h | 2.01E-07  | 3.22E-08 | 2.03E-08 | 3.79E-09 |
| 72h | 6.21E-08  | 8.45E-08 | 2.82E-08 | 2.25E-07 |
|     | cgd3_1900 |          |          |          |
| 2h  | 0.00E+00  | 0.00E+00 | 4.29E-06 | 3.83E-06 |
| 6h  | 2.13E-07  | 2.21E-05 | 2.85E-05 | 0.00E+00 |
| 12h | 0.00E+00  | 6.14E-07 | 1.08E-06 | 1.40E-06 |
| 24h | 8.35E-07  | 2.88E-06 | 1.73E-05 | 2.60E-06 |
| 36h | 4.01E-06  | 5.71E-05 | 1.23E-06 | 1.24E-05 |
| 48h | 7.28E-05  | 4.44E-05 | 2.60E-05 | 2.87E-06 |
| 72h | 5.03E-06  | 3.13E-05 | 1.65E-05 | 1.80E-04 |
|     | cgd3_1910 |          |          |          |
| 2h  | 1.60E-08  | 0.00E+00 | 3.82E-08 | 6.81E-07 |
| 6h  | 1.40E-09  | 8.86E-07 | 5.68E-07 | 1.57E-07 |
| 12h | 0.00E+00  | 2.50E-08 | 2.81E-07 | 0.00E+00 |
| 24h | 1.25E-09  | 1.20E-07 | 4.36E-07 | 5.85E-09 |
| 36h | 2.16E-07  | 4.60E-06 | 2.80E-07 | 5.07E-07 |
| 48h | 6.54E-07  | 2.38E-07 | 1.65E-07 | 1.16E-07 |
| 72h | 2.07E-07  | 2.81E-07 | 1.65E-07 | 1.31E-06 |
|     | cgd3_1920 |          |          |          |
| 2h  | 0.00E+00  | 0.00E+00 | 0.00E+00 | 0.00E+00 |
| 6h  | 1.96E-08  | 1.06E-08 | 4.24E-09 | 6.37E-08 |
| 12h | 1.11E-08  | 1.01E-09 | 1.38E-09 | 3.59E-09 |
| 24h | 4.42E-08  | 1.65E-08 | 1.18E-08 | 7.01E-08 |
| 36h | 4.39E-08  | 2.30E-08 | 3.60E-08 | 1.02E-07 |
| 48h | 2.25E-08  | 1.07E-08 | 8.41E-09 | 1.50E-08 |
| 72h | 2.29E-08  | 2.80E-09 | 1.08E-08 | 3.42E-08 |
|     | cgd3_1940 |          |          |          |
| 2h  | 4.06E-06  | 9.91E-06 | 3.40E-06 | 8.33E-06 |
| 6h  | 5.98E-06  | 7.55E-06 | 2.75E-06 | 1.46E-05 |
| 12h | 9.82E-06  | 6.43E-06 | 4.02E-06 | 1.36E-05 |
| 24h | 5.66E-06  | 4.14E-06 | 3.08E-06 | 1.32E-05 |
| 36h | 2.71E-06  | 4.64E-06 | 2.44E-06 | 4.31E-06 |
| 48h | 3.17E-06  | 1.24E-06 | 1.02E-06 | 4.94E-06 |
| 72h | 4.30E-07  | 3.77E-07 | 1.12E-07 | 5.96E-07 |
|     | cgd3_1950 |          |          |          |
| 2h  | 0.00E+00  | 0.00E+00 | 0.00E+00 | 0.00E+00 |
| 6h  | 0.00E+00  | 0.00E+00 | 0.00E+00 | 1.30E-07 |
| 12h | 7.43E-07  | 0.00E+00 | 0.00E+00 | 0.00E+00 |
| 24h | 6.37E-08  | 2.92E-07 | 4.39E-07 | 0.00E+00 |
| 36h | 2.67E-06  | 4.59E-06 | 6.33E-07 | 4.04E-06 |



|     |           |          |          |          |
|-----|-----------|----------|----------|----------|
| 48h | 1.34E-05  | 1.49E-06 | 5.16E-07 | 4.58E-06 |
| 72h | 2.05E-06  | 2.65E-06 | 4.48E-07 | 4.25E-06 |
|     | cgd3_1960 |          |          |          |
| 2h  | 0.00E+00  | 0.00E+00 | 2.98E-09 | 0.00E+00 |
| 6h  | 8.21E-10  | 8.77E-10 | 4.78E-08 | 9.94E-09 |
| 12h | 1.54E-09  | 2.95E-09 | 4.37E-09 | 0.00E+00 |
| 24h | 3.99E-09  | 0.00E+00 | 9.12E-09 | 2.26E-09 |
| 36h | 2.21E-08  | 6.42E-08 | 1.14E-08 | 1.55E-08 |
| 48h | 5.47E-08  | 1.61E-08 | 1.38E-08 | 3.33E-09 |
| 72h | 2.82E-08  | 1.19E-08 | 6.77E-09 | 4.60E-08 |
|     | cgd3_1980 |          |          |          |
| 2h  | 0.00E+00  | 0.00E+00 | 0.00E+00 | 0.00E+00 |
| 6h  | 1.94E-05  | 4.61E-06 | 4.16E-04 | 2.62E-07 |
| 12h | 4.02E-07  | 5.56E-07 | 6.66E-06 | 0.00E+00 |
| 24h | 3.87E-06  | 3.71E-06 | 7.14E-05 | 3.29E-06 |
| 36h | 1.03E-06  | 8.23E-05 | 2.96E-06 | 1.52E-06 |
| 48h | 1.30E-04  | 7.71E-05 | 3.52E-05 | 1.70E-05 |
| 72h | 9.37E-06  | 3.73E-06 | 1.39E-06 | 1.15E-05 |
|     | cgd3_2000 |          |          |          |
| 2h  | 0.00E+00  | 0.00E+00 | 2.26E-05 | 0.00E+00 |
| 6h  | 0.00E+00  | 0.00E+00 | 1.81E-04 | 1.37E-05 |
| 12h | 0.00E+00  | 0.00E+00 | 1.56E-05 | 9.97E-06 |
| 24h | 2.50E-06  | 1.19E-06 | 6.79E-05 | 8.09E-06 |
| 36h | 3.92E-05  | 6.76E-06 | 2.52E-05 | 1.44E-05 |
| 48h | 3.42E-05  | 4.48E-06 | 1.87E-05 | 2.63E-06 |
| 72h | 7.20E-05  | 4.17E-06 | 4.13E-05 | 1.24E-05 |
|     | cgd3_2010 |          |          |          |
| 2h  | 2.41E-08  | 0.00E+00 | 2.40E-07 | 0.00E+00 |
| 6h  | 3.96E-09  | 2.09E-09 | 1.68E-09 | 1.55E-08 |
| 12h | 1.75E-08  | 2.82E-08 | 3.59E-07 | 0.00E+00 |
| 24h | 2.09E-09  | 1.21E-08 | 4.12E-08 | 1.08E-08 |
| 36h | 2.35E-08  | 4.62E-07 | 3.21E-08 | 3.46E-08 |
| 48h | 3.32E-07  | 8.43E-08 | 3.97E-08 | 3.65E-08 |
| 72h | 2.99E-08  | 5.52E-08 | 5.20E-08 | 1.28E-07 |
|     | cgd3_2030 |          |          |          |
| 2h  | 0.00E+00  | 0.00E+00 | 3.03E-09 | 0.00E+00 |
| 6h  | 0.00E+00  | 7.67E-09 | 0.00E+00 | 0.00E+00 |
| 12h | 0.00E+00  | 0.00E+00 | 0.00E+00 | 0.00E+00 |
| 24h | 4.10E-09  | 0.00E+00 | 1.19E-08 | 3.50E-08 |
| 36h | 6.57E-09  | 2.17E-08 | 1.19E-08 | 2.45E-08 |
| 48h | 5.05E-08  | 8.60E-09 | 6.68E-09 | 8.79E-09 |
| 72h | 1.12E-08  | 1.66E-08 | 3.44E-09 | 5.08E-08 |
|     | cgd3_2040 |          |          |          |
| 2h  | 0.00E+00  | 0.00E+00 | 8.58E-09 | 0.00E+00 |
| 6h  | 5.06E-09  | 2.37E-09 | 9.82E-08 | 6.70E-08 |
| 12h | 0.00E+00  | 2.38E-09 | 1.47E-08 | 0.00E+00 |
| 24h | 8.58E-09  | 1.48E-08 | 3.17E-08 | 1.79E-08 |
| 36h | 7.99E-09  | 1.25E-07 | 1.81E-08 | 1.03E-08 |
| 48h | 3.25E-07  | 8.93E-08 | 4.99E-08 | 1.45E-08 |
| 72h | 1.34E-08  | 3.80E-08 | 4.55E-09 | 1.92E-08 |
|     | cgd3_2050 |          |          |          |
| 2h  | 0.00E+00  | 2.90E-08 | 7.15E-08 | 0.00E+00 |
| 6h  | 1.43E-08  | 6.38E-08 | 6.51E-07 | 1.10E-07 |

|           |          |          |          |          |
|-----------|----------|----------|----------|----------|
| 12h       | 0.00E+00 | 3.36E-09 | 0.00E+00 | 0.00E+00 |
| 24h       | 3.39E-08 | 2.34E-07 | 2.31E-07 | 1.37E-08 |
| 36h       | 1.41E-07 | 2.59E-06 | 2.25E-07 | 2.55E-08 |
| 48h       | 2.89E-06 | 1.65E-06 | 3.19E-07 | 1.25E-07 |
| 72h       | 7.66E-08 | 2.48E-07 | 5.45E-08 | 4.64E-07 |
| cgd3_2060 |          |          |          |          |
| 2h        | 0.00E+00 | 0.00E+00 | 5.45E-09 | 0.00E+00 |
| 6h        | 2.25E-08 | 5.16E-08 | 1.73E-07 | 6.66E-08 |
| 12h       | 1.15E-09 | 7.73E-10 | 4.52E-08 | 0.00E+00 |
| 24h       | 1.63E-09 | 1.90E-08 | 1.90E-07 | 2.33E-08 |
| 36h       | 1.79E-08 | 3.95E-07 | 1.83E-08 | 1.70E-08 |
| 48h       | 1.18E-07 | 9.24E-08 | 9.52E-08 | 9.29E-09 |
| 72h       | 6.27E-09 | 8.31E-09 | 6.95E-09 | 1.63E-08 |
| cgd3_2070 |          |          |          |          |
| 2h        | 0.00E+00 | 1.16E-08 | 0.00E+00 | 3.20E-08 |
| 6h        | 1.21E-08 | 1.59E-09 | 7.77E-09 | 5.11E-10 |
| 12h       | 6.53E-09 | 1.28E-09 | 2.34E-09 | 0.00E+00 |
| 24h       | 2.50E-08 | 4.60E-09 | 1.02E-08 | 1.44E-09 |
| 36h       | 1.35E-08 | 7.46E-09 | 1.78E-08 | 4.39E-09 |
| 48h       | 7.69E-09 | 4.57E-09 | 1.04E-09 | 1.10E-10 |
| 72h       | 1.27E-08 | 1.56E-09 | 6.29E-10 | 4.53E-09 |
| cgd3_2090 |          |          |          |          |
| 2h        | 2.73E-06 | 8.38E-07 | 2.76E-06 | 3.27E-06 |
| 6h        | 3.50E-05 | 1.19E-05 | 4.14E-06 | 1.09E-05 |
| 12h       | 7.44E-06 | 2.02E-06 | 3.45E-06 | 1.02E-05 |
| 24h       | 1.66E-05 | 4.35E-06 | 1.49E-05 | 1.55E-05 |
| 36h       | 1.15E-05 | 3.26E-06 | 3.87E-06 | 6.22E-06 |
| 48h       | 2.22E-06 | 6.19E-07 | 7.12E-07 | 1.54E-06 |
| 72h       | 1.03E-06 | 1.27E-07 | 2.54E-07 | 6.00E-07 |
| cgd3_2100 |          |          |          |          |
| 2h        | 1.61E-08 | 2.43E-08 | 4.16E-07 | 4.41E-08 |
| 6h        | 1.00E-09 | 4.83E-09 | 9.93E-08 | 2.35E-08 |
| 12h       | 6.09E-09 | 3.49E-08 | 1.68E-07 | 4.14E-08 |
| 24h       | 7.88E-09 | 3.31E-09 | 2.39E-08 | 4.43E-09 |
| 36h       | 1.32E-08 | 3.98E-08 | 1.87E-08 | 1.12E-08 |
| 48h       | 6.82E-08 | 3.38E-08 | 5.73E-08 | 5.14E-10 |
| 72h       | 3.21E-08 | 2.37E-08 | 1.27E-08 | 7.98E-08 |
| cgd3_2120 |          |          |          |          |
| 2h        | 0.00E+00 | 2.34E-09 | 0.00E+00 | 0.00E+00 |
| 6h        | 0.00E+00 | 0.00E+00 | 0.00E+00 | 0.00E+00 |
| 12h       | 9.97E-10 | 8.86E-09 | 2.36E-09 | 3.89E-09 |
| 24h       | 9.25E-10 | 0.00E+00 | 6.83E-09 | 0.00E+00 |
| 36h       | 2.59E-10 | 3.88E-08 | 2.10E-09 | 5.64E-10 |
| 48h       | 2.86E-08 | 8.78E-09 | 1.89E-08 | 0.00E+00 |
| 72h       | 1.26E-08 | 1.64E-08 | 1.36E-08 | 3.48E-08 |
| cgd3_2130 |          |          |          |          |
| 2h        | 2.61E-05 | 6.22E-05 | 3.86E-04 | 1.00E-04 |
| 6h        | 1.77E-04 | 1.78E-04 | 1.34E-03 | 3.72E-04 |
| 12h       | 1.88E-05 | 1.30E-04 | 6.82E-04 | 1.34E-04 |
| 24h       | 5.40E-05 | 3.18E-04 | 4.95E-04 | 3.76E-04 |
| 36h       | 2.78E-04 | 1.77E-04 | 3.35E-05 | 9.07E-04 |
| 48h       | 2.32E-04 | 2.75E-04 | 3.19E-04 | 9.74E-05 |
| 72h       | 8.45E-05 | 1.32E-04 | 9.03E-05 | 6.41E-04 |

|     |           |          |          |          |
|-----|-----------|----------|----------|----------|
|     | cgd3_2140 |          |          |          |
| 2h  | 0.00E+00  | 7.56E-10 | 1.08E-08 | 0.00E+00 |
| 6h  | 1.14E-07  | 4.24E-08 | 2.46E-07 | 7.81E-08 |
| 12h | 3.36E-09  | 4.35E-09 | 6.01E-09 | 1.93E-09 |
| 24h | 0.00E+00  | 8.55E-09 | 1.11E-07 | 2.30E-08 |
| 36h | 4.93E-08  | 9.74E-08 | 2.15E-08 | 4.74E-08 |
| 48h | 2.88E-07  | 2.16E-07 | 9.40E-08 | 6.63E-08 |
| 72h | 2.27E-08  | 4.82E-08 | 3.87E-08 | 3.24E-08 |
|     | cgd3_2160 |          |          |          |
| 2h  | 2.93E-08  | 3.26E-09 | 0.00E+00 | 3.33E-09 |
| 6h  | 7.77E-07  | 3.60E-07 | 3.87E-07 | 2.69E-07 |
| 12h | 5.13E-09  | 8.12E-09 | 1.21E-08 | 1.84E-08 |
| 24h | 4.15E-07  | 2.31E-07 | 1.42E-07 | 4.12E-07 |
| 36h | 8.30E-08  | 6.53E-08 | 1.62E-07 | 2.31E-07 |
| 48h | 8.67E-08  | 1.25E-07 | 5.14E-08 | 1.48E-07 |
| 72h | 1.96E-08  | 2.32E-08 | 1.34E-08 | 5.57E-08 |
|     | cgd3_2170 |          |          |          |
| 2h  | 0.00E+00  | 0.00E+00 | 0.00E+00 | 0.00E+00 |
| 6h  | 1.08E-07  | 1.20E-07 | 2.90E-07 | 9.80E-08 |
| 12h | 5.08E-09  | 6.44E-09 | 6.08E-09 | 1.46E-09 |
| 24h | 4.92E-08  | 1.40E-07 | 8.88E-08 | 3.90E-08 |
| 36h | 3.07E-08  | 7.22E-08 | 8.98E-08 | 4.75E-08 |
| 48h | 7.84E-08  | 1.72E-07 | 9.47E-08 | 2.83E-08 |
| 72h | 2.45E-08  | 3.91E-08 | 4.14E-08 | 3.27E-08 |
|     | cgd3_2200 |          |          |          |
| 2h  | 0.00E+00  | 0.00E+00 | 0.00E+00 | 0.00E+00 |
| 6h  | 2.08E-07  | 8.57E-08 | 3.11E-07 | 2.81E-07 |
| 12h | 0.00E+00  | 5.17E-09 | 2.00E-09 | 3.66E-09 |
| 24h | 7.92E-08  | 4.97E-08 | 2.00E-07 | 1.12E-07 |
| 36h | 9.64E-08  | 3.82E-07 | 1.38E-07 | 1.97E-07 |
| 48h | 1.58E-07  | 1.75E-07 | 7.17E-08 | 6.01E-08 |
| 72h | 1.07E-08  | 5.54E-08 | 1.31E-08 | 3.01E-08 |
|     | cgd3_2210 |          |          |          |
| 2h  | 0.00E+00  | 0.00E+00 | 2.84E-09 | 0.00E+00 |
| 6h  | 4.51E-09  | 1.36E-09 | 3.08E-08 | 5.54E-09 |
| 12h | 1.41E-09  | 1.96E-09 | 4.88E-09 | 1.96E-09 |
| 24h | 2.14E-09  | 3.47E-09 | 3.20E-08 | 7.14E-09 |
| 36h | 1.50E-08  | 6.97E-08 | 2.56E-08 | 2.80E-08 |
| 48h | 6.64E-08  | 7.59E-08 | 1.73E-08 | 1.15E-08 |
| 72h | 3.18E-08  | 6.70E-08 | 8.46E-09 | 8.77E-08 |
|     | cgd3_1800 |          |          |          |
| 2h  | 0.00E+00  | 0.00E+00 | 0.00E+00 | 0.00E+00 |
| 6h  | 0.00E+00  | 0.00E+00 | 0.00E+00 | 0.00E+00 |
| 12h | 8.87E-10  | 4.15E-09 | 4.31E-10 | 0.00E+00 |
| 24h | 6.68E-10  | 3.51E-10 | 1.29E-09 | 3.02E-09 |
| 36h | 1.01E-09  | 6.59E-09 | 4.26E-10 | 2.75E-09 |
| 48h | 2.14E-08  | 2.12E-08 | 7.98E-09 | 6.98E-09 |
| 72h | 1.82E-08  | 3.14E-08 | 2.16E-08 | 2.63E-08 |
|     | cgd3_2250 |          |          |          |
| 2h  | 2.78E-06  | 2.68E-07 | 2.23E-07 | 1.40E-06 |
| 6h  | 2.85E-06  | 1.59E-06 | 1.22E-06 | 2.34E-06 |
| 12h | 3.28E-06  | 5.88E-07 | 3.85E-07 | 3.20E-06 |
| 24h | 1.47E-06  | 1.01E-06 | 1.35E-06 | 4.22E-06 |

|     |           |          |          |          |
|-----|-----------|----------|----------|----------|
| 36h | 1.17E-06  | 5.01E-07 | 2.88E-07 | 1.06E-06 |
| 48h | 9.14E-07  | 1.75E-06 | 2.91E-07 | 3.22E-06 |
| 72h | 2.04E-07  | 2.76E-07 | 1.22E-07 | 2.23E-07 |
|     | cgd3_2280 |          |          |          |
| 2h  | 0.00E+00  | 9.32E-07 | 1.78E-08 | 0.00E+00 |
| 6h  | 0.00E+00  | 3.05E-07 | 0.00E+00 | 0.00E+00 |
| 12h | 2.82E-08  | 5.98E-07 | 2.79E-08 | 0.00E+00 |
| 24h | 1.13E-09  | 1.50E-07 | 4.19E-08 | 2.16E-10 |
| 36h | 2.55E-09  | 1.72E-06 | 7.34E-09 | 6.02E-09 |
| 48h | 7.28E-08  | 5.85E-07 | 4.35E-08 | 5.86E-09 |
| 72h | 4.38E-08  | 6.73E-07 | 3.43E-08 | 5.42E-08 |
|     | cgd3_2300 |          |          |          |
| 2h  | 1.64E-07  | 1.23E-06 | 6.38E-07 | 4.44E-06 |
| 6h  | 1.74E-07  | 6.12E-07 | 2.65E-07 | 6.98E-07 |
| 12h | 2.62E-07  | 8.73E-07 | 5.10E-07 | 2.17E-06 |
| 24h | 5.95E-08  | 1.27E-06 | 2.25E-07 | 9.43E-07 |
| 36h | 3.30E-07  | 2.30E-07 | 2.18E-07 | 4.71E-06 |
| 48h | 1.30E-06  | 4.47E-07 | 1.44E-07 | 3.52E-06 |
| 72h | 1.81E-07  | 1.84E-07 | 7.70E-07 | 9.32E-07 |
|     | cgd3_2310 |          |          |          |
| 2h  | 3.63E-07  | 2.50E-07 | 2.27E-07 | 7.02E-07 |
| 6h  | 2.45E-06  | 6.37E-07 | 6.51E-07 | 4.61E-07 |
| 12h | 9.97E-08  | 4.54E-07 | 3.78E-07 | 1.32E-06 |
| 24h | 4.30E-07  | 2.57E-07 | 7.26E-07 | 6.53E-07 |
| 36h | 4.88E-08  | 4.70E-07 | 1.63E-07 | 2.67E-07 |
| 48h | 2.38E-07  | 7.44E-07 | 2.67E-07 | 4.73E-07 |
| 72h | 9.56E-08  | 1.78E-07 | 5.72E-08 | 1.67E-07 |
|     | cgd3_2320 |          |          |          |
| 2h  | 3.24E-08  | 3.21E-09 | 9.78E-08 | 1.67E-08 |
| 6h  | 4.94E-09  | 8.30E-09 | 1.40E-08 | 7.18E-09 |
| 12h | 1.47E-09  | 6.21E-09 | 1.56E-08 | 4.77E-09 |
| 24h | 1.36E-09  | 2.21E-09 | 9.60E-09 | 3.73E-09 |
| 36h | 9.41E-09  | 4.47E-08 | 3.53E-09 | 6.48E-09 |
| 48h | 5.87E-08  | 3.18E-08 | 1.59E-08 | 8.69E-09 |
| 72h | 5.35E-09  | 2.46E-08 | 5.47E-09 | 2.93E-08 |
|     | cgd3_2330 |          |          |          |
| 2h  | 0.00E+00  | 0.00E+00 | 0.00E+00 | 0.00E+00 |
| 6h  | 7.64E-09  | 0.00E+00 | 2.74E-08 | 0.00E+00 |
| 12h | 1.88E-07  | 5.71E-07 | 1.81E-06 | 1.23E-07 |
| 24h | 8.89E-09  | 1.36E-08 | 5.19E-07 | 1.33E-08 |
| 36h | 1.19E-08  | 0.00E+00 | 2.31E-08 | 6.99E-09 |
| 48h | 2.81E-07  | 3.67E-07 | 2.65E-07 | 5.10E-08 |
| 72h | 4.33E-08  | 1.27E-07 | 9.53E-08 | 1.52E-07 |
|     | cgd3_2340 |          |          |          |
| 2h  | 7.27E-05  | 1.22E-05 | 9.34E-06 | 4.30E-05 |
| 6h  | 1.18E-04  | 3.89E-05 | 2.01E-05 | 1.37E-04 |
| 12h | 2.83E-05  | 1.18E-05 | 1.56E-05 | 1.58E-04 |
| 24h | 8.86E-05  | 2.87E-05 | 4.58E-05 | 1.69E-04 |
| 36h | 2.21E-05  | 1.81E-05 | 2.17E-05 | 3.88E-05 |
| 48h | 4.41E-05  | 1.23E-05 | 9.69E-06 | 3.44E-05 |
| 72h | 1.25E-05  | 7.69E-06 | 2.50E-06 | 2.55E-05 |
|     | cgd3_2360 |          |          |          |
| 2h  | 0.00E+00  | 0.00E+00 | 3.55E-08 | 2.56E-08 |

|     |           |          |          |          |
|-----|-----------|----------|----------|----------|
| 6h  | 3.13E-09  | 7.28E-08 | 9.18E-07 | 0.00E+00 |
| 12h | 2.32E-09  | 5.21E-08 | 5.01E-08 | 0.00E+00 |
| 24h | 9.33E-09  | 6.19E-09 | 4.28E-07 | 2.34E-09 |
| 36h | 2.11E-08  | 9.27E-07 | 2.94E-08 | 1.01E-08 |
| 48h | 6.70E-07  | 2.41E-07 | 2.20E-07 | 2.17E-08 |
| 72h | 1.92E-08  | 5.15E-08 | 1.99E-08 | 1.88E-07 |
|     | cgd3_2370 |          |          |          |
| 2h  | 4.20E-09  | 9.24E-09 | 2.48E-09 | 0.00E+00 |
| 6h  | 1.05E-08  | 9.70E-09 | 2.81E-07 | 1.99E-08 |
| 12h | 0.00E+00  | 3.03E-09 | 2.22E-08 | 0.00E+00 |
| 24h | 3.78E-09  | 1.26E-09 | 1.20E-07 | 5.52E-09 |
| 36h | 2.44E-08  | 1.01E-07 | 1.27E-08 | 1.71E-08 |
| 48h | 2.65E-07  | 5.10E-08 | 5.44E-08 | 4.11E-08 |
| 72h | 3.31E-08  | 2.65E-08 | 7.55E-09 | 5.02E-08 |
|     | cgd3_2400 |          |          |          |
| 2h  | 1.67E-08  | 6.03E-08 | 1.83E-07 | 5.52E-09 |
| 6h  | 5.29E-09  | 3.08E-08 | 8.84E-08 | 1.48E-08 |
| 12h | 2.09E-09  | 1.08E-08 | 1.59E-08 | 1.63E-09 |
| 24h | 1.02E-08  | 5.20E-09 | 8.33E-08 | 1.96E-08 |
| 36h | 2.27E-08  | 8.55E-08 | 1.90E-08 | 2.18E-08 |
| 48h | 6.60E-08  | 2.43E-08 | 3.56E-08 | 1.54E-08 |
| 72h | 3.25E-08  | 3.43E-08 | 2.38E-08 | 5.71E-08 |
|     | cgd3_2430 |          |          |          |
| 2h  | 5.77E-09  | 0.00E+00 | 7.14E-09 | 1.17E-08 |
| 6h  | 0.00E+00  | 0.00E+00 | 8.50E-10 | 0.00E+00 |
| 12h | 0.00E+00  | 8.22E-10 | 7.38E-10 | 0.00E+00 |
| 24h | 7.70E-10  | 0.00E+00 | 3.97E-09 | 2.78E-10 |
| 36h | 1.72E-09  | 5.18E-09 | 5.75E-10 | 3.09E-09 |
| 48h | 3.47E-08  | 0.00E+00 | 1.01E-08 | 5.13E-09 |
| 72h | 3.26E-08  | 2.48E-08 | 1.11E-08 | 1.73E-08 |
|     | cgd3_2440 |          |          |          |
| 2h  | 1.32E-05  | 5.65E-06 | 7.44E-05 | 1.50E-05 |
| 6h  | 7.52E-05  | 6.10E-05 | 1.74E-04 | 5.87E-05 |
| 12h | 3.26E-05  | 3.28E-05 | 1.23E-04 | 6.03E-05 |
| 24h | 7.99E-05  | 5.70E-05 | 1.46E-04 | 1.19E-04 |
| 36h | 2.91E-05  | 4.94E-05 | 3.86E-05 | 4.09E-05 |
| 48h | 1.03E-04  | 3.60E-05 | 5.02E-05 | 7.92E-05 |
| 72h | 4.84E-06  | 1.32E-06 | 1.49E-06 | 6.77E-06 |
|     | cgd3_2450 |          |          |          |
| 2h  | 0.00E+00  | 0.00E+00 | 1.62E-08 | 2.27E-09 |
| 6h  | 0.00E+00  | 0.00E+00 | 7.82E-10 | 0.00E+00 |
| 12h | 0.00E+00  | 6.45E-10 | 4.76E-09 | 8.21E-09 |
| 24h | 4.47E-10  | 5.32E-11 | 1.55E-09 | 0.00E+00 |
| 36h | 2.01E-09  | 1.85E-08 | 2.85E-09 | 3.16E-09 |
| 48h | 2.36E-08  | 1.67E-08 | 5.99E-09 | 1.16E-10 |
| 72h | 3.48E-09  | 2.63E-09 | 2.22E-09 | 9.71E-09 |
|     | cgd3_2460 |          |          |          |
| 2h  | 3.91E-07  | 9.96E-07 | 1.54E-06 | 4.70E-07 |
| 6h  | 2.72E-07  | 5.79E-07 | 1.01E-06 | 4.21E-07 |
| 12h | 3.74E-07  | 5.70E-07 | 8.62E-07 | 1.66E-06 |
| 24h | 1.51E-07  | 1.84E-07 | 6.03E-07 | 2.99E-07 |
| 36h | 6.92E-07  | 6.93E-07 | 1.18E-07 | 7.10E-07 |
| 48h | 1.47E-06  | 4.73E-07 | 2.79E-07 | 6.63E-07 |

|     |           |          |          |          |
|-----|-----------|----------|----------|----------|
| 72h | 2.57E-07  | 3.72E-07 | 1.12E-07 | 4.06E-07 |
|     | cgd3_2470 |          |          |          |
| 2h  | 6.05E-06  | 1.32E-05 | 5.78E-06 | 4.62E-06 |
| 6h  | 2.28E-06  | 6.67E-06 | 3.00E-06 | 2.22E-07 |
| 12h | 2.47E-06  | 6.16E-06 | 5.50E-06 | 7.37E-06 |
| 24h | 2.84E-06  | 1.46E-06 | 1.16E-05 | 3.61E-06 |
| 36h | 4.27E-06  | 2.10E-06 | 7.91E-07 | 4.06E-06 |
| 48h | 6.91E-06  | 1.45E-06 | 8.61E-07 | 2.23E-06 |
| 72h | 5.49E-07  | 5.16E-07 | 8.76E-07 | 1.21E-06 |
|     | cgd3_2520 |          |          |          |
| 2h  | 9.99E-10  | 8.50E-09 | 1.70E-08 | 1.64E-08 |
| 6h  | 8.84E-09  | 8.95E-09 | 4.62E-08 | 4.23E-08 |
| 12h | 0.00E+00  | 8.66E-10 | 2.84E-09 | 0.00E+00 |
| 24h | 2.33E-09  | 5.27E-09 | 1.35E-08 | 2.06E-09 |
| 36h | 9.87E-09  | 2.84E-08 | 1.16E-08 | 1.44E-08 |
| 48h | 1.17E-07  | 1.64E-08 | 1.31E-08 | 2.67E-08 |
| 72h | 1.40E-08  | 1.99E-08 | 4.53E-09 | 3.34E-08 |
|     | cgd3_2540 |          |          |          |
| 2h  | 8.28E-07  | 8.51E-07 | 2.16E-07 | 1.38E-06 |
| 6h  | 4.68E-06  | 1.08E-06 | 4.86E-07 | 5.09E-06 |
| 12h | 1.49E-06  | 1.49E-06 | 6.28E-07 | 2.90E-06 |
| 24h | 2.03E-06  | 5.90E-07 | 2.86E-07 | 2.70E-06 |
| 36h | 2.62E-06  | 1.57E-06 | 1.73E-06 | 6.32E-06 |
| 48h | 2.51E-06  | 1.69E-06 | 6.03E-07 | 4.43E-06 |
| 72h | 3.99E-07  | 3.72E-07 | 1.52E-07 | 1.34E-06 |
|     | cgd3_2560 |          |          |          |
| 2h  | 0.00E+00  | 0.00E+00 | 3.67E-08 | 0.00E+00 |
| 6h  | 1.04E-04  | 2.42E-06 | 1.30E-06 | 3.57E-06 |
| 12h | 0.00E+00  | 6.33E-08 | 1.69E-07 | 0.00E+00 |
| 24h | 1.98E-06  | 2.52E-07 | 2.58E-06 | 2.39E-06 |
| 36h | 2.47E-06  | 2.89E-06 | 3.90E-06 | 6.93E-06 |
| 48h | 4.23E-06  | 1.15E-06 | 4.15E-07 | 7.64E-07 |
| 72h | 1.09E-06  | 2.19E-06 | 1.27E-06 | 5.67E-06 |
|     | cgd3_2570 |          |          |          |
| 2h  | 1.01E-08  | 1.44E-08 | 1.07E-08 | 0.00E+00 |
| 6h  | 7.78E-08  | 2.27E-08 | 3.25E-08 | 7.38E-08 |
| 12h | 8.14E-09  | 9.22E-09 | 1.38E-08 | 0.00E+00 |
| 24h | 5.55E-08  | 3.65E-08 | 7.92E-08 | 1.45E-08 |
| 36h | 2.26E-08  | 7.65E-08 | 2.60E-08 | 9.84E-09 |
| 48h | 2.22E-07  | 1.56E-07 | 6.57E-08 | 1.73E-08 |
| 72h | 4.93E-08  | 5.95E-08 | 6.33E-08 | 1.04E-07 |
|     | cgd3_2650 |          |          |          |
| 2h  | 0.00E+00  | 0.00E+00 | 1.08E-09 | 3.74E-08 |
| 6h  | 3.82E-10  | 3.41E-09 | 2.49E-08 | 0.00E+00 |
| 12h | 1.02E-09  | 6.31E-10 | 9.86E-09 | 0.00E+00 |
| 24h | 1.76E-09  | 6.82E-09 | 7.18E-08 | 2.31E-09 |
| 36h | 1.84E-09  | 4.55E-08 | 3.12E-09 | 7.05E-10 |
| 48h | 8.46E-08  | 4.52E-08 | 1.66E-08 | 1.29E-09 |
| 72h | 9.51E-09  | 8.00E-09 | 3.04E-09 | 4.24E-09 |
|     | cgd3_2670 |          |          |          |
| 2h  | 5.99E-08  | 2.46E-08 | 2.82E-08 | 0.00E+00 |
| 6h  | 1.04E-07  | 2.67E-08 | 6.48E-09 | 8.86E-08 |
| 12h | 4.40E-09  | 1.06E-08 | 6.06E-08 | 1.82E-07 |

|           |          |          |          |          |
|-----------|----------|----------|----------|----------|
| 24h       | 2.92E-08 | 1.47E-08 | 4.21E-08 | 4.22E-08 |
| 36h       | 1.41E-08 | 8.01E-08 | 3.74E-09 | 5.06E-08 |
| 48h       | 6.10E-08 | 8.78E-08 | 1.79E-08 | 4.93E-09 |
| 72h       | 2.25E-08 | 3.31E-08 | 1.50E-08 | 7.66E-08 |
| cgd3_2690 |          |          |          |          |
| 2h        | 3.70E-09 | 0.00E+00 | 0.00E+00 | 0.00E+00 |
| 6h        | 2.30E-08 | 2.79E-08 | 1.33E-07 | 5.32E-09 |
| 12h       | 2.03E-09 | 2.61E-09 | 9.41E-09 | 2.01E-09 |
| 24h       | 8.26E-09 | 1.98E-08 | 5.48E-08 | 1.31E-08 |
| 36h       | 8.95E-09 | 1.86E-07 | 3.19E-08 | 9.54E-09 |
| 48h       | 1.07E-07 | 3.00E-08 | 1.88E-08 | 2.19E-09 |
| 72h       | 6.36E-09 | 2.23E-08 | 3.19E-08 | 2.25E-08 |
| cgd3_2770 |          |          |          |          |
| 2h        | 8.37E-09 | 1.53E-08 | 3.64E-08 | 1.55E-08 |
| 6h        | 3.76E-08 | 5.85E-08 | 2.14E-07 | 4.18E-08 |
| 12h       | 1.40E-09 | 2.45E-09 | 1.45E-08 | 1.30E-08 |
| 24h       | 6.84E-09 | 1.76E-08 | 1.05E-07 | 2.11E-08 |
| 36h       | 1.01E-08 | 1.54E-07 | 9.30E-09 | 1.51E-08 |
| 48h       | 1.60E-07 | 1.02E-07 | 6.53E-08 | 1.41E-08 |
| 72h       | 9.70E-09 | 3.38E-08 | 9.06E-09 | 5.31E-08 |
| cgd3_2780 |          |          |          |          |
| 2h        | 0.00E+00 | 0.00E+00 | 1.21E-08 | 7.01E-09 |
| 6h        | 1.38E-08 | 6.88E-09 | 6.50E-08 | 3.28E-08 |
| 12h       | 1.37E-09 | 0.00E+00 | 1.85E-08 | 0.00E+00 |
| 24h       | 8.35E-09 | 1.08E-08 | 5.23E-08 | 3.24E-09 |
| 36h       | 6.16E-09 | 5.14E-08 | 3.78E-09 | 6.10E-09 |
| 48h       | 6.22E-08 | 3.42E-08 | 2.77E-08 | 5.32E-09 |
| 72h       | 6.26E-09 | 9.90E-09 | 6.88E-09 | 1.56E-08 |
| cgd3_2790 |          |          |          |          |
| 2h        | 0.00E+00 | 0.00E+00 | 0.00E+00 | 0.00E+00 |
| 6h        | 3.00E-07 | 1.23E-06 | 1.25E-06 | 5.27E-06 |
| 12h       | 0.00E+00 | 3.43E-08 | 4.73E-08 | 0.00E+00 |
| 24h       | 3.72E-07 | 5.67E-07 | 1.39E-06 | 2.48E-07 |
| 36h       | 4.51E-08 | 7.38E-07 | 1.55E-07 | 8.66E-08 |
| 48h       | 1.93E-06 | 1.16E-06 | 1.01E-06 | 2.81E-08 |
| 72h       | 2.23E-08 | 5.44E-08 | 1.59E-08 | 2.17E-08 |
| cgd3_2820 |          |          |          |          |
| 2h        | 1.05E-08 | 1.16E-08 | 3.51E-09 | 8.45E-09 |
| 6h        | 3.45E-09 | 1.85E-09 | 5.72E-09 | 1.65E-09 |
| 12h       | 3.39E-08 | 8.18E-09 | 1.14E-08 | 6.39E-10 |
| 24h       | 1.66E-09 | 7.09E-10 | 4.12E-09 | 2.87E-09 |
| 36h       | 6.09E-09 | 1.63E-08 | 1.38E-09 | 2.33E-09 |
| 48h       | 1.06E-08 | 3.75E-09 | 1.58E-09 | 1.39E-09 |
| 72h       | 5.93E-09 | 2.10E-09 | 1.87E-09 | 1.83E-09 |
| cgd3_2850 |          |          |          |          |
| 2h        | 1.26E-07 | 7.35E-08 | 4.00E-09 | 2.13E-07 |
| 6h        | 5.35E-09 | 6.61E-10 | 5.78E-09 | 4.31E-09 |
| 12h       | 7.35E-09 | 9.21E-09 | 2.42E-08 | 5.09E-09 |
| 24h       | 2.01E-09 | 2.46E-09 | 1.97E-09 | 6.50E-09 |
| 36h       | 1.09E-08 | 1.48E-08 | 1.82E-09 | 9.23E-09 |
| 48h       | 6.09E-08 | 4.98E-08 | 1.34E-08 | 1.34E-08 |
| 72h       | 3.11E-08 | 6.31E-08 | 3.39E-09 | 2.80E-08 |
| cgd3_2860 |          |          |          |          |

|     |           |          |          |          |
|-----|-----------|----------|----------|----------|
| 2h  | 1.18E-08  | 0.00E+00 | 2.50E-09 | 0.00E+00 |
| 6h  | 5.24E-10  | 2.14E-09 | 9.36E-10 | 5.62E-10 |
| 12h | 3.92E-09  | 1.11E-08 | 1.38E-08 | 0.00E+00 |
| 24h | 9.69E-10  | 6.92E-10 | 1.80E-09 | 2.29E-10 |
| 36h | 2.06E-09  | 9.51E-09 | 1.67E-09 | 4.69E-10 |
| 48h | 2.03E-07  | 7.15E-08 | 6.96E-08 | 4.41E-08 |
| 72h | 1.02E-08  | 8.79E-09 | 4.16E-08 | 2.07E-08 |
|     | cgd3_2890 |          |          |          |
| 2h  | 1.61E-08  | 1.47E-08 | 1.93E-07 | 4.48E-08 |
| 6h  | 5.10E-10  | 2.28E-09 | 5.61E-08 | 0.00E+00 |
| 12h | 1.31E-09  | 1.16E-08 | 1.00E-07 | 0.00E+00 |
| 24h | 5.50E-10  | 5.16E-09 | 6.15E-08 | 3.29E-09 |
| 36h | 1.60E-09  | 3.08E-07 | 4.60E-09 | 1.83E-09 |
| 48h | 3.83E-07  | 1.12E-07 | 8.91E-08 | 4.38E-09 |
| 72h | 5.10E-09  | 1.54E-08 | 1.23E-08 | 1.18E-08 |
|     | cgd3_2900 |          |          |          |
| 2h  | 1.36E-08  | 0.00E+00 | 1.53E-09 | 0.00E+00 |
| 6h  | 8.61E-09  | 2.75E-10 | 6.77E-09 | 1.38E-08 |
| 12h | 2.57E-09  | 1.31E-09 | 7.10E-10 | 0.00E+00 |
| 24h | 6.11E-09  | 1.01E-10 | 1.31E-08 | 1.35E-08 |
| 36h | 1.35E-08  | 3.95E-08 | 4.29E-09 | 1.65E-08 |
| 48h | 2.98E-08  | 1.15E-08 | 3.83E-09 | 8.68E-09 |
| 72h | 6.04E-09  | 1.69E-08 | 4.31E-09 | 2.98E-08 |
|     | cgd3_2910 |          |          |          |
| 2h  | 0.00E+00  | 4.66E-09 | 1.58E-08 | 5.37E-09 |
| 6h  | 1.26E-07  | 5.68E-08 | 8.39E-08 | 8.91E-08 |
| 12h | 0.00E+00  | 5.66E-09 | 1.59E-09 | 8.37E-09 |
| 24h | 6.43E-08  | 3.60E-08 | 2.92E-08 | 6.60E-08 |
| 36h | 2.81E-08  | 1.64E-08 | 2.57E-08 | 2.83E-08 |
| 48h | 1.69E-08  | 3.67E-08 | 2.31E-08 | 4.08E-08 |
| 72h | 1.72E-08  | 6.98E-09 | 7.52E-09 | 1.16E-08 |
|     | cgd3_2930 |          |          |          |
| 2h  | 6.65E-09  | 1.03E-07 | 3.48E-08 | 7.47E-08 |
| 6h  | 6.66E-08  | 1.07E-08 | 1.15E-08 | 6.99E-08 |
| 12h | 3.50E-08  | 5.48E-09 | 2.47E-08 | 1.55E-08 |
| 24h | 2.36E-08  | 8.34E-09 | 1.24E-08 | 2.83E-08 |
| 36h | 3.44E-08  | 7.42E-09 | 7.95E-08 | 2.10E-08 |
| 48h | 5.71E-09  | 4.02E-08 | 3.37E-08 | 2.29E-08 |
| 72h | 3.88E-08  | 1.78E-08 | 1.64E-08 | 2.37E-08 |
|     | cgd3_2940 |          |          |          |
| 2h  | 2.02E-08  | 1.42E-09 | 2.36E-08 | 9.09E-08 |
| 6h  | 4.64E-09  | 6.53E-09 | 1.22E-08 | 3.83E-08 |
| 12h | 0.00E+00  | 9.98E-09 | 3.77E-08 | 6.44E-08 |
| 24h | 1.33E-08  | 3.36E-09 | 5.85E-09 | 3.96E-08 |
| 36h | 1.08E-08  | 1.63E-09 | 5.17E-08 | 5.26E-09 |
| 48h | 7.54E-09  | 2.89E-08 | 1.85E-08 | 1.96E-08 |
| 72h | 2.97E-08  | 1.29E-08 | 1.67E-08 | 3.32E-08 |
|     | cgd3_2980 |          |          |          |
| 2h  | 0.00E+00  | 0.00E+00 | 0.00E+00 | 1.27E-08 |
| 6h  | 2.27E-09  | 5.43E-08 | 0.00E+00 | 8.90E-08 |
| 12h | 0.00E+00  | 0.00E+00 | 6.33E-08 | 1.18E-09 |
| 24h | 1.15E-09  | 3.60E-09 | 5.51E-08 | 1.05E-07 |
| 36h | 6.37E-08  | 1.01E-08 | 2.23E-07 | 3.29E-08 |



|     |           |          |          |          |
|-----|-----------|----------|----------|----------|
| 48h | 1.57E-08  | 3.74E-07 | 1.95E-07 | 1.52E-07 |
| 72h | 2.95E-07  | 5.72E-08 | 3.84E-08 | 1.34E-07 |
|     | cgd3_2990 |          |          |          |
| 2h  | 0.00E+00  | 9.55E-09 | 0.00E+00 | 9.92E-09 |
| 6h  | 4.11E-09  | 1.88E-08 | 1.58E-09 | 9.94E-09 |
| 12h | 0.00E+00  | 0.00E+00 | 1.25E-10 | 9.46E-09 |
| 24h | 1.84E-09  | 1.89E-09 | 3.15E-09 | 2.17E-08 |
| 36h | 1.69E-09  | 3.39E-09 | 3.27E-08 | 5.66E-09 |
| 48h | 3.54E-09  | 3.93E-08 | 2.41E-08 | 3.60E-08 |
| 72h | 2.63E-08  | 2.51E-08 | 1.95E-08 | 7.43E-09 |
|     | cgd3_3010 |          |          |          |
| 2h  | 0.00E+00  | 1.45E-09 | 3.25E-08 | 1.39E-07 |
| 6h  | 2.53E-07  | 2.30E-07 | 1.70E-07 | 1.35E-06 |
| 12h | 1.62E-07  | 2.30E-07 | 1.08E-06 | 8.65E-06 |
| 24h | 4.70E-07  | 2.23E-07 | 2.12E-07 | 5.68E-06 |
| 36h | 3.20E-07  | 2.01E-07 | 3.49E-06 | 6.41E-07 |
| 48h | 1.05E-07  | 3.09E-06 | 2.06E-06 | 8.13E-06 |
| 72h | 4.87E-07  | 3.26E-07 | 1.01E-07 | 5.53E-08 |
|     | cgd3_3020 |          |          |          |
| 2h  | 0.00E+00  | 4.54E-07 | 1.32E-06 | 0.00E+00 |
| 6h  | 8.98E-05  | 2.56E-06 | 1.28E-04 | 4.64E-04 |
| 12h | 0.00E+00  | 1.08E-05 | 3.54E-05 | 6.15E-05 |
| 24h | 2.62E-05  | 8.67E-06 | 7.21E-05 | 1.40E-04 |
| 36h | 7.47E-05  | 4.04E-06 | 1.37E-04 | 6.42E-05 |
| 48h | 2.77E-05  | 2.59E-04 | 2.79E-04 | 3.07E-04 |
| 72h | 5.54E-05  | 1.62E-05 | 2.15E-05 | 6.12E-05 |
|     | cgd3_3030 |          |          |          |
| 2h  | 0.00E+00  | 0.00E+00 | 0.00E+00 | 1.44E-08 |
| 6h  | 3.76E-09  | 1.00E-09 | 3.19E-09 | 1.33E-08 |
| 12h | 5.42E-08  | 2.23E-08 | 4.17E-08 | 9.32E-08 |
| 24h | 5.57E-09  | 4.58E-09 | 5.65E-09 | 3.91E-08 |
| 36h | 2.92E-08  | 1.93E-08 | 4.58E-07 | 6.68E-08 |
| 48h | 9.71E-09  | 1.11E-07 | 1.03E-07 | 1.93E-07 |
| 72h | 1.07E-07  | 3.89E-08 | 8.36E-08 | 1.05E-07 |
|     | cgd3_3040 |          |          |          |
| 2h  | 0.00E+00  | 0.00E+00 | 0.00E+00 | 1.18E-09 |
| 6h  | 6.24E-09  | 2.56E-09 | 9.12E-10 | 3.02E-09 |
| 12h | 5.37E-07  | 8.01E-07 | 8.45E-07 | 0.00E+00 |
| 24h | 9.42E-08  | 2.34E-08 | 5.81E-08 | 1.26E-07 |
| 36h | 1.45E-07  | 1.45E-07 | 2.07E-06 | 1.78E-07 |
| 48h | 1.27E-07  | 3.46E-07 | 1.61E-07 | 1.48E-07 |
| 72h | 6.77E-08  | 2.84E-08 | 2.01E-08 | 5.09E-08 |
|     | cgd3_3080 |          |          |          |
| 2h  | 0.00E+00  | 5.40E-09 | 8.97E-09 | 9.98E-09 |
| 6h  | 1.05E-08  | 4.21E-10 | 7.33E-09 | 4.60E-09 |
| 12h | 0.00E+00  | 0.00E+00 | 4.15E-10 | 1.49E-09 |
| 24h | 4.19E-09  | 5.64E-10 | 1.47E-09 | 1.18E-08 |
| 36h | 2.77E-09  | 1.86E-09 | 2.22E-08 | 1.62E-09 |
| 48h | 3.00E-09  | 3.07E-08 | 8.24E-09 | 1.54E-08 |
| 72h | 4.95E-09  | 4.54E-09 | 7.78E-09 | 8.33E-09 |
|     | cgd3_3100 |          |          |          |
| 2h  | 0.00E+00  | 0.00E+00 | 0.00E+00 | 7.48E-10 |
| 6h  | 0.00E+00  | 0.00E+00 | 0.00E+00 | 4.24E-10 |

|     |           |          |          |          |
|-----|-----------|----------|----------|----------|
| 12h | 5.93E-08  | 8.70E-08 | 3.93E-07 | 1.32E-07 |
| 24h | 5.50E-09  | 1.79E-09 | 1.26E-08 | 1.41E-08 |
| 36h | 1.17E-08  | 1.76E-08 | 3.08E-07 | 1.48E-08 |
| 48h | 3.06E-08  | 1.51E-07 | 1.09E-07 | 5.13E-08 |
| 72h | 2.33E-08  | 2.27E-08 | 2.36E-08 | 8.62E-09 |
|     | cgd3_3110 |          |          |          |
| 2h  | 0.00E+00  | 0.00E+00 | 3.72E-08 | 3.37E-09 |
| 6h  | 7.48E-08  | 2.04E-07 | 9.39E-08 | 3.63E-07 |
| 12h | 1.84E-07  | 3.57E-08 | 3.85E-07 | 1.24E-07 |
| 24h | 1.56E-07  | 1.21E-07 | 1.30E-07 | 9.39E-07 |
| 36h | 2.33E-07  | 1.19E-07 | 1.05E-06 | 4.69E-08 |
| 48h | 2.90E-07  | 5.99E-07 | 9.85E-07 | 1.23E-06 |
| 72h | 1.18E-06  | 9.71E-07 | 9.22E-07 | 2.53E-07 |
|     | cgd3_3350 |          |          |          |
| 2h  | 1.28E-06  | 1.19E-05 | 3.11E-06 | 1.02E-05 |
| 6h  | 6.41E-07  | 3.21E-07 | 1.94E-06 | 1.91E-06 |
| 12h | 3.46E-07  | 8.09E-07 | 9.49E-07 | 1.87E-06 |
| 24h | 3.55E-07  | 5.07E-07 | 1.93E-06 | 1.04E-06 |
| 36h | 1.71E-06  | 5.55E-06 | 2.87E-07 | 3.59E-06 |
| 48h | 4.13E-06  | 4.51E-06 | 1.43E-06 | 1.33E-06 |
| 72h | 1.39E-06  | 1.31E-06 | 4.44E-07 | 2.86E-06 |
|     | cgd3_3360 |          |          |          |
| 2h  | 1.30E-08  | 6.48E-07 | 1.06E-06 | 1.03E-07 |
| 6h  | 2.73E-08  | 8.66E-08 | 2.82E-07 | 6.32E-08 |
| 12h | 1.73E-08  | 1.40E-07 | 2.90E-07 | 3.03E-08 |
| 24h | 1.16E-08  | 1.35E-07 | 2.91E-07 | 6.40E-08 |
| 36h | 4.03E-08  | 4.39E-07 | 2.27E-08 | 5.41E-08 |
| 48h | 7.23E-07  | 2.31E-07 | 2.59E-07 | 4.63E-08 |
| 72h | 9.27E-08  | 1.44E-07 | 8.06E-08 | 2.18E-07 |
|     | cgd3_3370 |          |          |          |
| 2h  | 0.00E+00  | 0.00E+00 | 0.00E+00 | 0.00E+00 |
| 6h  | 0.00E+00  | 0.00E+00 | 0.00E+00 | 0.00E+00 |
| 12h | 2.22E-04  | 3.94E-04 | 9.90E-04 | 3.38E-05 |
| 24h | 4.86E-06  | 1.58E-05 | 3.89E-05 | 4.50E-06 |
| 36h | 3.56E-05  | 5.65E-04 | 1.15E-05 | 1.97E-05 |
| 48h | 2.16E-04  | 5.52E-05 | 5.05E-05 | 1.43E-05 |
| 72h | 6.20E-06  | 9.30E-06 | 1.16E-05 | 1.12E-05 |
|     | cgd3_3380 |          |          |          |
| 2h  | 1.00E-07  | 2.35E-07 | 5.45E-07 | 4.18E-08 |
| 6h  | 2.78E-09  | 1.35E-08 | 1.12E-08 | 1.03E-08 |
| 12h | 1.29E-07  | 1.91E-07 | 9.34E-07 | 2.11E-07 |
| 24h | 3.01E-08  | 3.10E-08 | 1.41E-07 | 2.17E-08 |
| 36h | 4.84E-08  | 3.14E-07 | 2.54E-08 | 2.63E-08 |
| 48h | 3.08E-07  | 6.38E-08 | 8.99E-08 | 4.86E-08 |
| 72h | 3.16E-08  | 3.28E-08 | 2.24E-08 | 8.21E-08 |
|     | cgd3_3390 |          |          |          |
| 2h  | 0.00E+00  | 3.62E-09 | 0.00E+00 | 1.26E-03 |
| 6h  | 2.17E-09  | 2.72E-08 | 2.93E-08 | 0.00E+00 |
| 12h | 0.00E+00  | 4.96E-09 | 8.80E-09 | 1.53E-05 |
| 24h | 5.45E-09  | 9.27E-09 | 1.81E-08 | 7.27E-04 |
| 36h | 1.14E-08  | 7.35E-08 | 6.37E-09 | 0.00E+00 |
| 48h | 9.52E-08  | 2.57E-08 | 4.59E-09 | 1.37E-04 |
| 72h | 1.48E-08  | 1.63E-08 | 1.75E-08 | 1.21E-04 |

|     |           |          |          |          |
|-----|-----------|----------|----------|----------|
|     | cgd3_3400 |          |          |          |
| 2h  | 0.00E+00  | 0.00E+00 | 0.00E+00 | 0.00E+00 |
| 6h  | 3.25E-07  | 7.00E-08 | 9.81E-09 | 1.84E-07 |
| 12h | 1.09E-08  | 1.36E-08 | 2.58E-08 | 6.90E-08 |
| 24h | 3.25E-07  | 9.23E-08 | 5.58E-08 | 1.53E-07 |
| 36h | 1.48E-07  | 2.09E-07 | 3.74E-08 | 9.43E-08 |
| 48h | 1.02E-06  | 9.50E-07 | 0.00E+00 | 1.10E-06 |
| 72h | 9.79E-08  | 2.32E-07 | 2.57E-08 | 5.83E-07 |
|     | cgd3_3410 |          |          |          |
| 2h  | 0.00E+00  | 0.00E+00 | 5.73E-09 | 0.00E+00 |
| 6h  | 7.49E-08  | 1.14E-07 | 5.23E-07 | 1.53E-07 |
| 12h | 3.25E-09  | 8.35E-09 | 4.39E-08 | 5.24E-09 |
| 24h | 4.23E-08  | 5.87E-08 | 5.58E-07 | 3.11E-08 |
| 36h | 2.89E-08  | 1.45E-06 | 2.53E-08 | 1.55E-08 |
| 48h | 8.50E-07  | 2.64E-07 | 2.81E-07 | 3.00E-08 |
| 72h | 1.51E-08  | 1.50E-08 | 7.76E-09 | 2.20E-08 |
|     | cgd3_3420 |          |          |          |
| 2h  | 0.00E+00  | 2.13E-09 | 2.99E-09 | 0.00E+00 |
| 6h  | 2.85E-08  | 1.06E-08 | 7.73E-08 | 6.79E-08 |
| 12h | 2.49E-09  | 3.63E-09 | 1.32E-08 | 3.88E-09 |
| 24h | 3.19E-08  | 1.04E-08 | 1.64E-07 | 1.89E-08 |
| 36h | 4.24E-08  | 2.53E-07 | 6.44E-09 | 2.68E-08 |
| 48h | 2.03E-07  | 1.19E-07 | 4.73E-08 | 2.38E-08 |
| 72h | 1.36E-08  | 2.68E-08 | 8.39E-09 | 4.90E-08 |
|     | cgd3_3440 |          |          |          |
| 2h  | 1.23E-08  | 7.11E-08 | 3.41E-07 | 0.00E+00 |
| 6h  | 2.14E-09  | 2.30E-08 | 3.83E-08 | 2.61E-08 |
| 12h | 2.20E-09  | 1.69E-08 | 6.51E-08 | 1.73E-08 |
| 24h | 9.50E-09  | 8.69E-09 | 6.95E-08 | 1.85E-08 |
| 36h | 5.44E-07  | 1.40E-07 | 1.14E-08 | 1.65E-08 |
| 48h | 1.78E-07  | 3.88E-08 | 1.87E-08 | 4.10E-09 |
| 72h | 2.37E-08  | 2.00E-08 | 1.50E-08 | 1.83E-08 |
|     | cgd3_3470 |          |          |          |
| 2h  | 4.32E-07  | 0.00E+00 | 0.00E+00 | 0.00E+00 |
| 6h  | 1.61E-06  | 5.21E-07 | 2.87E-06 | 1.40E-05 |
| 12h | 6.27E-07  | 5.38E-07 | 2.64E-06 | 0.00E+00 |
| 24h | 1.05E-05  | 1.07E-06 | 2.63E-06 | 3.70E-06 |
| 36h | 1.27E-05  | 3.58E-06 | 3.81E-06 | 6.50E-06 |
| 48h | 5.64E-05  | 8.85E-06 | 4.51E-06 | 8.33E-06 |
| 72h | 1.00E-05  | 2.56E-06 | 8.96E-07 | 3.41E-06 |
|     | cgd3_3480 |          |          |          |
| 2h  | 0.00E+00  | 0.00E+00 | 0.00E+00 | 0.00E+00 |
| 6h  | 0.00E+00  | 0.00E+00 | 7.00E-10 | 1.36E-08 |
| 12h | 3.92E-09  | 6.29E-09 | 1.32E-08 | 8.39E-09 |
| 24h | 4.91E-09  | 1.35E-09 | 5.44E-09 | 2.85E-10 |
| 36h | 2.64E-08  | 1.20E-07 | 1.01E-08 | 1.45E-08 |
| 48h | 2.28E-07  | 4.26E-08 | 2.93E-08 | 6.98E-09 |
| 72h | 1.32E-08  | 2.21E-08 | 1.60E-08 | 2.27E-08 |
|     | cgd3_3540 |          |          |          |
| 2h  | 0.00E+00  | 1.04E-07 | 1.99E-07 | 0.00E+00 |
| 6h  | 5.14E-10  | 3.26E-09 | 2.41E-08 | 1.92E-09 |
| 12h | 1.09E-09  | 1.19E-08 | 7.43E-08 | 0.00E+00 |
| 24h | 3.65E-09  | 4.12E-09 | 5.11E-08 | 5.88E-11 |

|     |           |          |          |          |
|-----|-----------|----------|----------|----------|
| 36h | 1.15E-08  | 1.24E-07 | 2.79E-09 | 2.35E-10 |
| 48h | 1.70E-07  | 1.35E-08 | 2.39E-08 | 2.64E-10 |
| 72h | 7.25E-08  | 2.01E-07 | 9.05E-08 | 0.00E+00 |
|     | cgd1_3100 |          |          |          |
| 2h  | 8.03E-04  | 6.69E-05 | 1.36E-03 | 1.35E-04 |
| 6h  | 3.16E-04  | 5.93E-05 | 8.71E-04 | 9.59E-05 |
| 12h | 7.44E-05  | 1.16E-04 | 3.84E-04 | 2.89E-06 |
| 24h | 5.23E-05  | 1.41E-04 | 1.19E-04 | 1.00E-05 |
| 36h | 9.30E-05  | 3.13E-05 | 1.96E-04 | 1.54E-05 |
| 48h | 1.39E-04  | 6.74E-05 | 6.73E-05 | 8.70E-05 |
| 72h | 9.66E-05  | 7.86E-05 | 5.70E-06 | 5.82E-05 |
|     | cgd1_3110 |          |          |          |
| 2h  | 7.40E-08  | 0.00E+00 | 0.00E+00 | 0.00E+00 |
| 6h  | 1.99E-08  | 0.00E+00 | 1.46E-07 | 7.45E-08 |
| 12h | 3.71E-08  | 8.69E-08 | 4.53E-07 | 0.00E+00 |
| 24h | 3.07E-07  | 3.69E-09 | 1.13E-06 | 2.15E-08 |
| 36h | 4.47E-06  | 8.25E-07 | 1.90E-06 | 8.07E-07 |
| 48h | 1.77E-06  | 3.49E-06 | 1.81E-05 | 3.16E-05 |
| 72h | 5.81E-06  | 5.93E-06 | 1.99E-05 | 1.01E-05 |
|     | cgd1_3120 |          |          |          |
| 2h  | 0.00E+00  | 0.00E+00 | 0.00E+00 | 0.00E+00 |
| 6h  | 0.00E+00  | 0.00E+00 | 0.00E+00 | 0.00E+00 |
| 12h | 1.39E-11  | 1.39E-10 | 1.58E-09 | 0.00E+00 |
| 24h | 3.60E-11  | 0.00E+00 | 2.12E-09 | 0.00E+00 |
| 36h | 9.13E-10  | 4.74E-10 | 5.83E-10 | 1.68E-10 |
| 48h | 3.78E-08  | 7.87E-08 | 3.30E-07 | 2.36E-07 |
| 72h | 2.83E-07  | 1.06E-07 | 1.25E-06 | 2.76E-06 |
|     | cgd1_3140 |          |          |          |
| 2h  | 1.98E-03  | 7.94E-03 | 2.10E-02 | 9.46E-05 |
| 6h  | 2.03E-03  | 8.61E-04 | 2.07E-03 | 3.66E-05 |
| 12h | 2.33E-03  | 2.56E-03 | 6.21E-03 | 1.67E-04 |
| 24h | 6.35E-04  | 6.05E-04 | 1.29E-03 | 1.07E-04 |
| 36h | 7.93E-04  | 2.37E-04 | 2.16E-03 | 2.31E-04 |
| 48h | 7.81E-04  | 8.63E-04 | 1.99E-03 | 3.25E-04 |
| 72h | 2.13E-04  | 1.15E-06 | 1.74E-03 | 7.23E-05 |
|     | cgd1_3150 |          |          |          |
| 2h  | 0.00E+00  | 0.00E+00 | 0.00E+00 | 0.00E+00 |
| 6h  | 0.00E+00  | 0.00E+00 | 0.00E+00 | 0.00E+00 |
| 12h | 0.00E+00  | 0.00E+00 | 1.21E-08 | 1.30E-09 |
| 24h | 3.65E-09  | 3.38E-09 | 0.00E+00 | 4.53E-10 |
| 36h | 1.30E-08  | 6.47E-08 | 2.76E-09 | 1.36E-09 |
| 48h | 3.24E-07  | 1.56E-07 | 1.10E-07 | 5.33E-08 |
| 72h | 1.10E-07  | 8.23E-07 | 4.60E-07 | 1.32E-07 |
|     | cgd1_3160 |          |          |          |
| 2h  | 1.07E-05  | 2.85E-04 | 1.68E-05 | 1.23E-04 |
| 6h  | 2.33E-05  | 7.01E-04 | 7.69E-05 | 6.23E-04 |
| 12h | 6.86E-06  | 6.17E-04 | 2.28E-05 | 1.40E-04 |
| 24h | 3.30E-05  | 1.28E-04 | 7.41E-05 | 1.00E-03 |
| 36h | 5.70E-06  | 7.12E-06 | 1.20E-05 | 1.77E-04 |
| 48h | 3.38E-05  | 1.48E-04 | 4.93E-05 | 2.73E-04 |
| 72h | 1.02E-05  | 1.25E-04 | 1.48E-05 | 1.49E-04 |
|     | cgd1_3180 |          |          |          |
| 2h  | 0.00E+00  | 1.07E-06 | 1.69E-07 | 0.00E+00 |

|           |          |          |          |          |
|-----------|----------|----------|----------|----------|
| 6h        | 0.00E+00 | 0.00E+00 | 0.00E+00 | 0.00E+00 |
| 12h       | 1.08E-06 | 1.93E-05 | 6.64E-06 | 9.29E-07 |
| 24h       | 1.13E-06 | 4.24E-06 | 1.50E-06 | 6.86E-07 |
| 36h       | 2.90E-06 | 1.09E-04 | 6.77E-06 | 1.52E-06 |
| 48h       | 6.84E-06 | 9.73E-05 | 4.42E-05 | 5.45E-06 |
| 72h       | 3.70E-06 | 4.38E-05 | 1.47E-05 | 3.88E-06 |
| cgd1_3190 |          |          |          |          |
| 2h        | 2.15E-07 | 9.12E-08 | 2.16E-08 | 2.16E-07 |
| 6h        | 4.78E-07 | 5.45E-07 | 3.14E-06 | 2.84E-06 |
| 12h       | 2.94E-08 | 1.23E-08 | 9.30E-07 | 1.61E-07 |
| 24h       | 3.35E-07 | 1.97E-07 | 5.59E-06 | 4.43E-07 |
| 36h       | 1.03E-06 | 1.59E-06 | 1.61E-06 | 2.40E-07 |
| 48h       | 1.75E-07 | 6.24E-07 | 1.06E-06 | 2.09E-07 |
| 72h       | 2.76E-07 | 4.85E-07 | 1.27E-06 | 1.98E-07 |
| cgd1_3200 |          |          |          |          |
| 2h        | 7.83E-08 | 6.76E-07 | 6.13E-08 | 3.59E-07 |
| 6h        | 7.95E-08 | 7.30E-07 | 1.24E-06 | 3.73E-07 |
| 12h       | 8.14E-08 | 3.81E-08 | 5.72E-07 | 1.23E-07 |
| 24h       | 4.94E-07 | 4.01E-07 | 1.05E-06 | 1.40E-07 |
| 36h       | 3.95E-07 | 9.26E-07 | 1.00E-05 | 1.76E-07 |
| 48h       | 1.28E-06 | 4.87E-07 | 7.22E-07 | 2.23E-07 |
| 72h       | 5.59E-08 | 1.80E-07 | 4.80E-08 | 4.13E-08 |
| cgd1_3210 |          |          |          |          |
| 2h        | 0.00E+00 | 0.00E+00 | 0.00E+00 | 0.00E+00 |
| 6h        | 0.00E+00 | 0.00E+00 | 0.00E+00 | 0.00E+00 |
| 12h       | 6.96E-07 | 5.82E-07 | 5.43E-06 | 1.24E-06 |
| 24h       | 3.09E-06 | 3.73E-06 | 3.54E-06 | 4.29E-07 |
| 36h       | 2.04E-06 | 4.01E-06 | 4.70E-06 | 2.01E-06 |
| 48h       | 4.69E-06 | 3.40E-06 | 4.39E-06 | 8.05E-07 |
| 72h       | 8.02E-07 | 1.47E-06 | 6.30E-07 | 1.17E-06 |
| cgd1_3220 |          |          |          |          |
| 2h        | 0.00E+00 | 0.00E+00 | 0.00E+00 | 0.00E+00 |
| 6h        | 0.00E+00 | 0.00E+00 | 0.00E+00 | 0.00E+00 |
| 12h       | 2.14E-06 | 4.01E-06 | 1.01E-04 | 2.96E-06 |
| 24h       | 3.33E-06 | 1.03E-05 | 6.01E-05 | 1.58E-06 |
| 36h       | 1.96E-06 | 1.87E-05 | 7.42E-05 | 4.56E-06 |
| 48h       | 8.83E-06 | 1.28E-05 | 6.62E-05 | 2.05E-06 |
| 72h       | 1.59E-06 | 2.31E-05 | 2.78E-06 | 1.27E-06 |
| cgd1_3230 |          |          |          |          |
| 2h        | 3.01E-08 | 0.00E+00 | 0.00E+00 | 0.00E+00 |
| 6h        | 1.16E-08 | 0.00E+00 | 4.48E-09 | 1.25E-08 |
| 12h       | 8.39E-08 | 7.21E-07 | 2.92E-06 | 4.65E-07 |
| 24h       | 1.48E-07 | 7.15E-07 | 7.48E-07 | 5.58E-08 |
| 36h       | 3.72E-07 | 1.43E-06 | 2.27E-06 | 6.21E-07 |
| 48h       | 5.31E-07 | 1.25E-06 | 2.10E-06 | 1.80E-07 |
| 72h       | 8.95E-07 | 1.53E-06 | 1.39E-06 | 8.38E-07 |
| cgd1_3240 |          |          |          |          |
| 2h        | 3.94E-04 | 7.42E-05 | 1.80E-05 | 9.57E-04 |
| 6h        | 1.19E-02 | 1.33E-04 | 1.66E-04 | 3.47E-03 |
| 12h       | 6.82E-04 | 3.39E-05 | 9.73E-05 | 1.27E-03 |
| 24h       | 1.05E-03 | 7.80E-05 | 4.67E-04 | 1.14E-03 |
| 36h       | 1.35E-03 | 7.82E-05 | 1.41E-04 | 6.73E-04 |
| 48h       | 2.72E-03 | 5.68E-05 | 2.17E-04 | 6.75E-04 |

|     |           |          |          |          |
|-----|-----------|----------|----------|----------|
| 72h | 1.72E-03  | 9.13E-05 | 5.64E-05 | 2.25E-03 |
|     | cgd1_3250 |          |          |          |
| 2h  | 1.93E-02  | 1.30E-02 | 1.73E-03 | 1.71E-02 |
| 6h  | 9.20E-03  | 6.55E-03 | 3.81E-03 | 6.78E-03 |
| 12h | 8.30E-03  | 2.27E-03 | 1.97E-03 | 1.60E-02 |
| 24h | 8.08E-03  | 3.31E-03 | 1.53E-03 | 2.85E-03 |
| 36h | 7.38E-03  | 3.78E-03 | 1.01E-03 | 2.85E-03 |
| 48h | 4.34E-03  | 2.10E-03 | 5.47E-04 | 1.99E-03 |
| 72h | 3.98E-03  | 1.78E-03 | 6.93E-05 | 9.23E-04 |
|     | cgd1_3260 |          |          |          |
| 2h  | 1.87E-05  | 1.84E-05 | 0.00E+00 | 2.04E-05 |
| 6h  | 7.57E-06  | 1.41E-05 | 1.58E-05 | 4.02E-06 |
| 12h | 1.31E-05  | 1.13E-05 | 8.35E-05 | 1.15E-05 |
| 24h | 6.65E-06  | 4.77E-05 | 5.86E-05 | 4.22E-06 |
| 36h | 6.78E-06  | 3.27E-05 | 3.05E-05 | 5.50E-06 |
| 48h | 5.11E-06  | 1.16E-05 | 2.09E-05 | 2.98E-06 |
| 72h | 3.53E-06  | 4.38E-06 | 2.00E-06 | 1.20E-06 |
|     | cgd1_3290 |          |          |          |
| 2h  | 5.35E-06  | 1.06E-05 | 7.08E-06 | 3.65E-05 |
| 6h  | 5.93E-06  | 8.68E-06 | 4.62E-06 | 4.60E-06 |
| 12h | 5.82E-07  | 3.89E-07 | 1.70E-06 | 3.02E-06 |
| 24h | 2.10E-06  | 1.66E-06 | 5.44E-06 | 3.94E-06 |
| 36h | 3.24E-06  | 4.68E-06 | 1.62E-06 | 1.36E-06 |
| 48h | 8.55E-06  | 1.73E-06 | 3.20E-06 | 5.31E-06 |
| 72h | 3.37E-06  | 1.38E-06 | 3.00E-07 | 3.38E-07 |
|     | cgd3_3560 |          |          |          |
| 2h  | 2.78E-08  | 1.49E-09 | 6.82E-09 | 2.07E-07 |
| 6h  | 1.70E-09  | 0.00E+00 | 0.00E+00 | 0.00E+00 |
| 12h | 3.77E-08  | 2.64E-09 | 5.31E-10 | 4.36E-08 |
| 24h | 2.83E-09  | 1.57E-09 | 7.81E-09 | 7.56E-09 |
| 36h | 3.51E-08  | 1.27E-07 | 4.74E-09 | 3.46E-07 |
| 48h | 3.39E-07  | 2.11E-07 | 9.63E-08 | 5.34E-07 |
| 72h | 3.10E-07  | 2.02E-07 | 7.83E-08 | 7.26E-07 |
|     | cgd3_3570 |          |          |          |
| 2h  | 1.52E-04  | 0.00E+00 | 1.67E-05 | 6.01E-03 |
| 6h  | 1.89E-04  | 2.06E-05 | 3.06E-05 | 3.30E-03 |
| 12h | 9.22E-05  | 3.82E-06 | 1.68E-05 | 9.89E-04 |
| 24h | 1.69E-05  | 1.60E-05 | 2.42E-05 | 1.91E-03 |
| 36h | 4.86E-05  | 4.67E-05 | 1.15E-05 | 1.32E-03 |
| 48h | 2.04E-05  | 2.53E-05 | 4.84E-05 | 4.04E-04 |
| 72h | 1.63E-04  | 4.81E-05 | 6.52E-06 | 2.08E-03 |
|     | cgd3_3580 |          |          |          |
| 2h  | 5.58E-08  | 7.71E-09 | 6.06E-08 | 1.27E-07 |
| 6h  | 9.51E-09  | 1.07E-08 | 5.01E-09 | 2.46E-07 |
| 12h | 7.47E-08  | 2.70E-08 | 7.98E-08 | 4.64E-07 |
| 24h | 3.22E-08  | 5.42E-08 | 9.11E-08 | 2.73E-07 |
| 36h | 1.92E-08  | 1.12E-07 | 6.75E-09 | 3.42E-07 |
| 48h | 1.22E-07  | 4.68E-08 | 4.66E-08 | 2.50E-07 |
| 72h | 3.02E-08  | 1.05E-07 | 1.99E-08 | 3.92E-07 |
|     | cgd3_3590 |          |          |          |
| 2h  | 0.00E+00  | 0.00E+00 | 0.00E+00 | 0.00E+00 |
| 6h  | 1.06E-09  | 2.38E-10 | 4.20E-09 | 1.55E-08 |
| 12h | 0.00E+00  | 2.38E-09 | 7.50E-10 | 0.00E+00 |

|           |          |          |          |          |
|-----------|----------|----------|----------|----------|
| 24h       | 4.25E-09 | 2.73E-09 | 6.35E-09 | 2.12E-08 |
| 36h       | 2.34E-08 | 1.62E-08 | 1.03E-08 | 2.60E-08 |
| 48h       | 3.24E-08 | 1.99E-08 | 1.24E-08 | 3.81E-08 |
| 72h       | 8.39E-08 | 6.33E-08 | 1.64E-08 | 1.24E-07 |
| cgd3_3600 |          |          |          |          |
| 2h        | 0.00E+00 | 0.00E+00 | 0.00E+00 | 0.00E+00 |
| 6h        | 4.38E-10 | 0.00E+00 | 1.58E-07 | 4.63E-07 |
| 12h       | 2.30E-07 | 9.06E-08 | 5.48E-08 | 0.00E+00 |
| 24h       | 3.24E-08 | 2.31E-08 | 9.03E-08 | 4.11E-07 |
| 36h       | 2.65E-07 | 1.30E-07 | 7.86E-08 | 1.24E-06 |
| 48h       | 1.59E-06 | 7.03E-07 | 3.46E-07 | 2.04E-06 |
| 72h       | 2.51E-07 | 7.96E-07 | 3.68E-07 | 1.11E-06 |
| cgd3_3610 |          |          |          |          |
| 2h        | 0.00E+00 | 0.00E+00 | 0.00E+00 | 0.00E+00 |
| 6h        | 1.94E-09 | 0.00E+00 | 4.96E-09 | 2.67E-07 |
| 12h       | 3.99E-09 | 3.75E-09 | 5.22E-09 | 0.00E+00 |
| 24h       | 7.15E-09 | 1.62E-08 | 1.58E-08 | 3.67E-08 |
| 36h       | 1.52E-08 | 1.81E-07 | 1.71E-08 | 4.02E-07 |
| 48h       | 7.16E-08 | 3.72E-06 | 3.99E-08 | 1.12E-07 |
| 72h       | 1.38E-08 | 4.52E-07 | 5.02E-09 | 1.05E-07 |
| cgd3_3680 |          |          |          |          |
| 2h        | 4.50E-08 | 2.31E-08 | 1.35E-07 | 8.16E-07 |
| 6h        | 2.95E-08 | 1.39E-08 | 1.34E-07 | 3.73E-07 |
| 12h       | 5.39E-08 | 5.52E-08 | 2.55E-07 | 1.61E-06 |
| 24h       | 1.41E-08 | 4.74E-08 | 1.57E-07 | 1.27E-07 |
| 36h       | 2.05E-08 | 1.22E-07 | 6.30E-09 | 3.55E-07 |
| 48h       | 3.76E-07 | 7.53E-08 | 6.05E-08 | 3.99E-07 |
| 72h       | 4.38E-08 | 3.27E-08 | 1.07E-08 | 2.22E-07 |
| cgd3_3700 |          |          |          |          |
| 2h        | 0.00E+00 | 0.00E+00 | 3.28E-06 | 0.00E+00 |
| 6h        | 0.00E+00 | 2.00E-09 | 0.00E+00 | 0.00E+00 |
| 12h       | 0.00E+00 | 1.63E-09 | 1.82E-07 | 0.00E+00 |
| 24h       | 2.49E-09 | 6.83E-09 | 0.00E+00 | 0.00E+00 |
| 36h       | 0.00E+00 | 2.96E-08 | 2.44E-08 | 1.42E-06 |
| 48h       | 7.70E-06 | 3.08E-08 | 1.44E-06 | 7.96E-07 |
| 72h       | 6.63E-08 | 1.09E-08 | 2.24E-06 | 1.35E-06 |
| cgd3_3710 |          |          |          |          |
| 2h        | 0.00E+00 | 0.00E+00 | 0.00E+00 | 0.00E+00 |
| 6h        | 5.63E-10 | 2.71E-09 | 1.28E-07 | 3.35E-07 |
| 12h       | 9.35E-09 | 1.14E-09 | 5.13E-09 | 7.66E-08 |
| 24h       | 9.76E-09 | 3.48E-08 | 5.54E-08 | 2.40E-07 |
| 36h       | 1.84E-08 | 9.04E-08 | 2.28E-08 | 9.95E-07 |
| 48h       | 1.75E-07 | 7.86E-08 | 7.04E-08 | 4.52E-07 |
| 72h       | 4.77E-09 | 2.98E-08 | 1.73E-08 | 4.89E-07 |
| cgd3_3740 |          |          |          |          |
| 2h        | 0.00E+00 | 0.00E+00 | 4.28E-09 | 0.00E+00 |
| 6h        | 0.00E+00 | 0.00E+00 | 0.00E+00 | 0.00E+00 |
| 12h       | 0.00E+00 | 0.00E+00 | 4.69E-10 | 0.00E+00 |
| 24h       | 3.26E-10 | 0.00E+00 | 7.20E-10 | 0.00E+00 |
| 36h       | 1.18E-09 | 5.79E-09 | 0.00E+00 | 5.29E-09 |
| 48h       | 6.14E-07 | 2.80E-07 | 2.46E-07 | 5.21E-07 |
| 72h       | 9.13E-08 | 1.48E-06 | 6.71E-07 | 1.51E-06 |
| cgd3_3770 |          |          |          |          |

|     |           |          |          |          |
|-----|-----------|----------|----------|----------|
| 2h  | 1.89E-06  | 8.30E-07 | 2.11E-06 | 3.71E-04 |
| 6h  | 3.40E-07  | 1.03E-06 | 6.48E-06 | 3.30E-05 |
| 12h | 1.94E-07  | 1.85E-07 | 5.90E-07 | 1.06E-05 |
| 24h | 2.74E-07  | 1.18E-06 | 6.95E-06 | 3.13E-05 |
| 36h | 7.41E-07  | 8.66E-06 | 5.13E-07 | 2.67E-05 |
| 48h | 6.85E-06  | 1.43E-06 | 1.48E-06 | 9.07E-06 |
| 72h | 6.71E-07  | 4.02E-07 | 2.86E-07 | 6.23E-06 |
|     | cgd3_3800 |          |          |          |
| 2h  | 4.06E-09  | 0.00E+00 | 5.50E-09 | 0.00E+00 |
| 6h  | 3.12E-08  | 1.29E-09 | 1.62E-08 | 0.00E+00 |
| 12h | 1.91E-09  | 3.59E-08 | 5.00E-09 | 2.41E-07 |
| 24h | 1.54E-08  | 8.96E-09 | 4.91E-08 | 9.62E-08 |
| 36h | 3.35E-08  | 7.99E-08 | 3.53E-09 | 1.65E-07 |
| 48h | 9.42E-08  | 1.67E-08 | 8.42E-09 | 3.63E-08 |
| 72h | 0.00E+00  | 1.28E-07 | 5.11E-08 | 1.52E-06 |
|     | cgd3_3840 |          |          |          |
| 2h  | 2.12E-06  | 1.93E-04 | 2.29E-04 | 8.43E-03 |
| 6h  | 1.76E-04  | 6.94E-04 | 1.60E-03 | 3.01E-03 |
| 12h | 3.98E-05  | 1.52E-04 | 4.45E-04 | 9.59E-04 |
| 24h | 8.62E-04  | 2.97E-04 | 7.63E-04 | 1.96E-04 |
| 36h | 5.04E-04  | 6.59E-04 | 4.59E-04 | 6.70E-05 |
| 48h | 2.76E-03  | 1.79E-04 | 2.57E-04 | 4.40E-05 |
| 72h | 5.90E-05  | 1.39E-04 | 3.24E-04 | 1.13E-04 |
|     | cgd3_3860 |          |          |          |
| 2h  | 0.00E+00  | 1.20E-09 | 0.00E+00 | 0.00E+00 |
| 6h  | 6.85E-10  | 0.00E+00 | 1.49E-09 | 7.33E-09 |
| 12h | 6.54E-10  | 2.09E-10 | 1.89E-09 | 3.39E-09 |
| 24h | 4.34E-10  | 1.91E-09 | 2.79E-09 | 1.50E-08 |
| 36h | 8.08E-09  | 1.23E-07 | 2.17E-08 | 6.75E-08 |
| 48h | 1.47E-07  | 2.95E-08 | 2.98E-08 | 3.97E-08 |
| 72h | 9.70E-09  | 9.78E-08 | 4.99E-08 | 5.59E-08 |
|     | cgd3_3880 |          |          |          |
| 2h  | 3.45E-10  | 7.77E-08 | 1.08E-07 | 1.45E-06 |
| 6h  | 2.93E-09  | 4.24E-09 | 2.23E-08 | 6.49E-08 |
| 12h | 1.23E-08  | 5.98E-08 | 1.66E-07 | 1.05E-07 |
| 24h | 3.66E-09  | 1.13E-08 | 3.87E-08 | 7.22E-08 |
| 36h | 2.70E-09  | 2.69E-07 | 1.01E-08 | 1.35E-07 |
| 48h | 1.01E-07  | 8.35E-08 | 3.20E-08 | 8.40E-08 |
| 72h | 1.49E-08  | 6.00E-08 | 5.09E-08 | 1.44E-07 |
|     | cgd3_3890 |          |          |          |
| 2h  | 3.02E-06  | 7.40E-06 | 7.49E-06 | 2.64E-05 |
| 6h  | 3.73E-05  | 9.44E-06 | 5.49E-06 | 1.52E-05 |
| 12h | 1.02E-05  | 1.16E-05 | 1.88E-05 | 1.32E-05 |
| 24h | 3.99E-05  | 8.01E-06 | 1.04E-05 | 5.38E-06 |
| 36h | 7.78E-06  | 8.13E-06 | 5.13E-06 | 8.62E-06 |
| 48h | 7.82E-06  | 3.79E-06 | 1.39E-06 | 2.08E-06 |
| 72h | 4.26E-07  | 9.28E-07 | 3.42E-07 | 6.99E-07 |
|     | cgd3_3900 |          |          |          |
| 2h  | 0.00E+00  | 0.00E+00 | 0.00E+00 | 0.00E+00 |
| 6h  | 0.00E+00  | 0.00E+00 | 0.00E+00 | 7.99E-10 |
| 12h | 0.00E+00  | 1.65E-10 | 2.06E-08 | 1.29E-09 |
| 24h | 1.08E-10  | 1.14E-09 | 8.88E-10 | 1.63E-08 |
| 36h | 3.76E-09  | 8.30E-08 | 9.61E-11 | 1.02E-07 |



|     |           |          |          |          |
|-----|-----------|----------|----------|----------|
| 48h | 7.23E-08  | 4.40E-08 | 6.52E-08 | 5.79E-08 |
| 72h | 4.73E-08  | 3.11E-08 | 4.54E-08 | 2.36E-07 |
|     | cgd3_3910 |          |          |          |
| 2h  | 0.00E+00  | 8.24E-09 | 3.68E-08 | 3.66E-07 |
| 6h  | 2.46E-09  | 4.32E-08 | 1.34E-07 | 6.83E-07 |
| 12h | 7.19E-09  | 3.54E-08 | 3.24E-07 | 7.01E-08 |
| 24h | 1.10E-08  | 5.20E-08 | 5.28E-07 | 5.85E-07 |
| 36h | 1.89E-08  | 9.73E-07 | 7.49E-08 | 2.96E-06 |
| 48h | 1.51E-06  | 1.73E-06 | 2.22E-06 | 1.14E-06 |
| 72h | 3.93E-08  | 1.25E-07 | 2.53E-07 | 3.22E-07 |
|     | cgd3_3920 |          |          |          |
| 2h  | 7.16E-07  | 2.40E-06 | 1.00E-05 | 4.68E-05 |
| 6h  | 5.49E-08  | 1.35E-07 | 9.84E-08 | 1.07E-07 |
| 12h | 1.78E-07  | 2.59E-06 | 2.44E-06 | 6.66E-06 |
| 24h | 1.06E-07  | 3.80E-07 | 6.71E-07 | 4.36E-07 |
| 36h | 8.09E-08  | 8.03E-07 | 2.39E-07 | 5.70E-07 |
| 48h | 1.18E-06  | 8.97E-07 | 7.03E-07 | 7.96E-07 |
| 72h | 6.64E-08  | 2.27E-07 | 3.40E-07 | 4.76E-07 |
|     | cgd3_3930 |          |          |          |
| 2h  | 6.71E-07  | 8.94E-07 | 1.57E-06 | 2.72E-06 |
| 6h  | 8.30E-06  | 5.44E-06 | 3.01E-06 | 5.50E-06 |
| 12h | 2.20E-06  | 2.01E-06 | 2.70E-06 | 4.79E-06 |
| 24h | 5.53E-06  | 4.99E-06 | 7.18E-06 | 4.20E-06 |
| 36h | 2.17E-06  | 1.06E-06 | 2.39E-06 | 2.15E-06 |
| 48h | 1.12E-06  | 1.57E-06 | 1.44E-06 | 1.78E-06 |
| 72h | 3.16E-07  | 1.22E-07 | 2.03E-07 | 3.26E-07 |
|     | cgd3_3950 |          |          |          |
| 2h  | 0.00E+00  | 0.00E+00 | 1.67E-08 | 5.77E-07 |
| 6h  | 1.69E-09  | 3.90E-08 | 3.59E-08 | 3.81E-08 |
| 12h | 1.32E-08  | 2.97E-09 | 1.20E-09 | 3.36E-09 |
| 24h | 4.80E-09  | 1.71E-08 | 3.85E-08 | 3.52E-08 |
| 36h | 1.14E-08  | 3.19E-08 | 3.21E-08 | 3.79E-08 |
| 48h | 5.46E-08  | 5.96E-08 | 4.85E-08 | 9.02E-08 |
| 72h | 1.04E-08  | 9.24E-09 | 5.72E-09 | 3.14E-08 |
|     | cgd3_3960 |          |          |          |
| 2h  | 0.00E+00  | 0.00E+00 | 0.00E+00 | 0.00E+00 |
| 6h  | 5.59E-10  | 0.00E+00 | 2.51E-08 | 4.93E-08 |
| 12h | 6.97E-10  | 1.46E-10 | 7.84E-09 | 7.85E-10 |
| 24h | 4.10E-09  | 5.51E-09 | 1.37E-08 | 4.99E-08 |
| 36h | 4.80E-09  | 3.30E-08 | 8.67E-09 | 7.44E-08 |
| 48h | 1.07E-07  | 3.91E-08 | 4.94E-08 | 1.13E-07 |
| 72h | 3.91E-09  | 3.66E-08 | 2.21E-09 | 2.36E-08 |
|     | cgd3_3970 |          |          |          |
| 2h  | 8.00E-08  | 1.41E-08 | 6.64E-08 | 6.99E-08 |
| 6h  | 1.63E-08  | 7.26E-09 | 9.09E-10 | 3.77E-08 |
| 12h | 6.77E-08  | 4.11E-09 | 8.67E-09 | 2.43E-08 |
| 24h | 8.35E-09  | 8.85E-09 | 3.13E-08 | 4.10E-08 |
| 36h | 1.91E-08  | 3.99E-08 | 2.72E-08 | 5.79E-08 |
| 48h | 1.06E-07  | 4.12E-08 | 6.39E-08 | 1.55E-07 |
| 72h | 2.33E-08  | 4.45E-08 | 2.06E-08 | 3.10E-08 |
|     | cgd3_3980 |          |          |          |
| 2h  | 0.00E+00  | 2.60E-08 | 2.79E-07 | 5.63E-06 |
| 6h  | 9.06E-10  | 2.56E-08 | 1.35E-06 | 9.74E-07 |

|     |           |          |          |          |
|-----|-----------|----------|----------|----------|
| 12h | 4.12E-08  | 6.61E-08 | 4.86E-08 | 2.24E-07 |
| 24h | 3.85E-08  | 5.90E-08 | 8.31E-07 | 1.45E-06 |
| 36h | 4.17E-08  | 1.43E-05 | 2.82E-07 | 2.67E-06 |
| 48h | 1.21E-06  | 1.61E-06 | 1.53E-06 | 1.96E-06 |
| 72h | 2.41E-07  | 1.66E-06 | 5.81E-07 | 2.73E-06 |
|     | cgd3_4010 |          |          |          |
| 2h  | 5.74E-08  | 6.34E-07 | 4.11E-07 | 3.41E-06 |
| 6h  | 2.08E-04  | 2.21E-06 | 2.20E-06 | 2.97E-05 |
| 12h | 5.52E-06  | 1.12E-06 | 2.13E-06 | 1.55E-06 |
| 24h | 1.07E-04  | 6.36E-06 | 3.96E-05 | 1.66E-05 |
| 36h | 4.44E-05  | 1.72E-05 | 2.66E-06 | 1.34E-05 |
| 48h | 1.02E-04  | 1.90E-05 | 3.26E-06 | 1.10E-05 |
| 72h | 2.09E-05  | 1.15E-05 | 1.54E-06 | 1.09E-05 |
|     | cgd3_4020 |          |          |          |
| 2h  | 2.00E-07  | 9.60E-08 | 2.75E-07 | 1.91E-07 |
| 6h  | 4.02E-06  | 6.12E-07 | 1.72E-07 | 5.06E-07 |
| 12h | 1.44E-06  | 2.35E-07 | 1.68E-07 | 4.07E-07 |
| 24h | 4.81E-06  | 1.76E-07 | 4.39E-07 | 1.18E-06 |
| 36h | 1.09E-06  | 3.05E-07 | 7.58E-07 | 4.15E-07 |
| 48h | 6.30E-07  | 1.10E-07 | 5.37E-08 | 1.72E-07 |
| 72h | 2.52E-07  | 1.76E-07 | 3.81E-08 | 2.90E-07 |
|     | cgd3_4050 |          |          |          |
| 2h  | 0.00E+00  | 0.00E+00 | 5.37E-08 | 1.45E-07 |
| 6h  | 0.00E+00  | 0.00E+00 | 5.52E-10 | 9.21E-09 |
| 12h | 0.00E+00  | 1.13E-10 | 5.61E-09 | 1.06E-09 |
| 24h | 2.73E-10  | 5.34E-10 | 4.44E-09 | 5.74E-08 |
| 36h | 3.63E-10  | 2.19E-08 | 1.94E-09 | 1.02E-08 |
| 48h | 4.11E-07  | 8.31E-08 | 5.35E-08 | 1.18E-07 |
| 72h | 8.34E-07  | 1.05E-06 | 1.04E-06 | 1.90E-06 |
|     | cgd3_4060 |          |          |          |
| 2h  | 1.55E-07  | 2.18E-08 | 1.12E-08 | 4.76E-06 |
| 6h  | 6.50E-08  | 1.60E-07 | 8.21E-07 | 6.70E-06 |
| 12h | 1.58E-08  | 1.82E-07 | 9.03E-08 | 6.27E-07 |
| 24h | 9.15E-07  | 8.92E-07 | 5.03E-06 | 1.69E-05 |
| 36h | 1.04E-06  | 9.83E-06 | 7.43E-07 | 4.42E-06 |
| 48h | 1.52E-05  | 6.66E-06 | 3.70E-06 | 3.48E-06 |
| 72h | 2.35E-05  | 7.91E-06 | 1.62E-05 | 2.79E-05 |
|     | cgd3_4070 |          |          |          |
| 2h  | 9.38E-08  | 1.44E-07 | 2.04E-07 | 1.60E-06 |
| 6h  | 1.73E-07  | 1.79E-07 | 9.88E-08 | 4.23E-07 |
| 12h | 1.09E-07  | 1.47E-07 | 3.80E-07 | 3.31E-07 |
| 24h | 1.73E-07  | 2.51E-07 | 2.90E-07 | 8.38E-07 |
| 36h | 7.82E-08  | 3.56E-07 | 1.97E-07 | 1.54E-07 |
| 48h | 5.31E-07  | 2.79E-07 | 8.19E-08 | 3.09E-07 |
| 72h | 1.75E-08  | 4.94E-08 | 3.27E-08 | 7.30E-08 |
|     | cgd3_4090 |          |          |          |
| 2h  | 0.00E+00  | 0.00E+00 | 0.00E+00 | 3.06E-07 |
| 6h  | 4.91E-08  | 4.55E-06 | 4.33E-06 | 1.65E-05 |
| 12h | 2.44E-06  | 4.00E-08 | 1.79E-07 | 2.38E-07 |
| 24h | 5.03E-07  | 2.14E-06 | 3.92E-06 | 2.09E-05 |
| 36h | 3.57E-07  | 1.50E-05 | 2.29E-07 | 5.55E-06 |
| 48h | 2.41E-05  | 7.05E-06 | 7.17E-06 | 1.16E-05 |
| 72h | 1.46E-06  | 1.53E-06 | 1.13E-06 | 7.52E-06 |

|     |           |          |          |          |
|-----|-----------|----------|----------|----------|
|     | cgd3_4180 |          |          |          |
| 2h  | 1.54E-07  | 2.77E-07 | 1.17E-06 | 5.49E-06 |
| 6h  | 8.18E-09  | 1.62E-08 | 6.61E-08 | 1.67E-07 |
| 12h | 3.00E-07  | 4.36E-07 | 2.08E-06 | 9.39E-07 |
| 24h | 2.29E-07  | 2.40E-07 | 6.13E-07 | 1.91E-06 |
| 36h | 4.71E-08  | 8.11E-07 | 9.10E-08 | 3.78E-07 |
| 48h | 1.01E-06  | 2.12E-07 | 2.43E-07 | 4.17E-07 |
| 72h | 1.10E-07  | 1.24E-07 | 2.38E-08 | 1.26E-07 |
|     | cgd3_4200 |          |          |          |
| 2h  | 0.00E+00  | 8.47E-10 | 0.00E+00 | 5.96E-09 |
| 6h  | 6.94E-10  | 2.77E-10 | 3.45E-10 | 6.95E-09 |
| 12h | 0.00E+00  | 1.15E-09 | 5.47E-09 | 1.68E-09 |
| 24h | 3.74E-09  | 1.16E-09 | 3.72E-09 | 1.32E-08 |
| 36h | 1.55E-09  | 1.83E-08 | 8.69E-09 | 2.05E-08 |
| 48h | 4.79E-07  | 2.11E-07 | 1.01E-07 | 2.20E-07 |
| 72h | 1.42E-08  | 2.40E-08 | 8.74E-09 | 1.77E-08 |
|     | cgd3_4250 |          |          |          |
| 2h  | 5.53E-08  | 1.92E-07 | 1.40E-06 | 2.26E-06 |
| 6h  | 1.36E-08  | 4.32E-08 | 3.35E-08 | 1.40E-07 |
| 12h | 1.92E-07  | 2.38E-07 | 6.56E-07 | 3.32E-07 |
| 24h | 5.81E-08  | 1.16E-07 | 4.94E-07 | 7.67E-07 |
| 36h | 5.03E-08  | 5.61E-07 | 3.78E-08 | 1.31E-07 |
| 48h | 7.48E-07  | 2.63E-07 | 1.67E-07 | 2.23E-07 |
| 72h | 3.70E-08  | 2.56E-08 | 2.29E-08 | 2.37E-08 |
|     | cgd3_4270 |          |          |          |
| 2h  | 1.67E-08  | 9.35E-08 | 4.91E-07 | 1.66E-06 |
| 6h  | 3.84E-09  | 1.66E-08 | 4.70E-08 | 5.40E-08 |
| 12h | 2.81E-08  | 1.42E-07 | 2.95E-07 | 2.05E-07 |
| 24h | 2.68E-08  | 4.04E-08 | 2.94E-07 | 1.58E-07 |
| 36h | 9.17E-09  | 1.15E-07 | 1.26E-08 | 1.48E-08 |
| 48h | 1.49E-07  | 7.11E-08 | 1.03E-07 | 6.19E-08 |
| 72h | 4.90E-08  | 3.81E-08 | 2.06E-08 | 6.26E-08 |
|     | cgd3_4280 |          |          |          |
| 2h  | 2.62E-06  | 8.27E-06 | 2.09E-05 | 1.15E-04 |
| 6h  | 2.39E-09  | 4.19E-08 | 2.51E-08 | 5.03E-08 |
| 12h | 8.89E-07  | 7.17E-06 | 1.53E-05 | 4.84E-06 |
| 24h | 1.16E-07  | 7.00E-07 | 4.46E-06 | 2.55E-06 |
| 36h | 8.02E-08  | 3.13E-06 | 1.97E-07 | 9.68E-07 |
| 48h | 1.55E-06  | 1.52E-06 | 1.18E-06 | 1.35E-06 |
| 72h | 2.02E-07  | 6.19E-07 | 1.40E-06 | 9.90E-07 |
|     | cgd3_4290 |          |          |          |
| 2h  | 4.90E-09  | 0.00E+00 | 1.39E-09 | 6.46E-08 |
| 6h  | 1.14E-10  | 3.95E-10 | 6.69E-09 | 2.52E-08 |
| 12h | 0.00E+00  | 1.60E-09 | 1.72E-08 | 8.62E-09 |
| 24h | 3.82E-10  | 2.84E-09 | 8.68E-09 | 3.36E-08 |
| 36h | 1.06E-09  | 4.34E-08 | 1.21E-09 | 3.86E-08 |
| 48h | 4.53E-08  | 2.40E-08 | 3.47E-08 | 2.22E-08 |
| 72h | 3.00E-08  | 1.44E-08 | 9.17E-09 | 6.65E-08 |
|     | cgd3_4330 |          |          |          |
| 2h  | 1.05E-09  | 1.95E-09 | 4.45E-09 | 1.23E-07 |
| 6h  | 5.13E-09  | 1.83E-08 | 9.33E-09 | 8.58E-08 |
| 12h | 8.69E-09  | 3.49E-09 | 3.91E-08 | 2.95E-08 |
| 24h | 7.87E-09  | 1.09E-08 | 2.61E-08 | 1.22E-07 |

|     |           |          |          |          |
|-----|-----------|----------|----------|----------|
| 36h | 7.06E-09  | 3.38E-08 | 9.37E-09 | 4.58E-08 |
| 48h | 9.64E-08  | 5.23E-08 | 2.11E-08 | 6.70E-08 |
| 72h | 7.97E-09  | 1.39E-08 | 4.84E-08 | 1.32E-08 |
|     | cgd3_4340 |          |          |          |
| 2h  | 6.50E-10  | 6.29E-09 | 0.00E+00 | 2.22E-09 |
| 6h  | 2.07E-09  | 1.96E-09 | 9.99E-09 | 1.10E-08 |
| 12h | 1.70E-08  | 4.92E-09 | 1.60E-08 | 2.82E-09 |
| 24h | 2.79E-08  | 2.39E-08 | 4.59E-08 | 2.29E-08 |
| 36h | 4.91E-08  | 4.96E-08 | 8.95E-08 | 7.10E-08 |
| 48h | 3.59E-07  | 7.22E-08 | 4.40E-08 | 1.27E-07 |
| 72h | 1.23E-07  | 7.37E-08 | 3.33E-07 | 9.72E-08 |
|     | cgd3_4350 |          |          |          |
| 2h  | 2.49E-09  | 0.00E+00 | 0.00E+00 | 0.00E+00 |
| 6h  | 2.87E-09  | 5.25E-09 | 1.49E-08 | 3.46E-08 |
| 12h | 8.48E-10  | 4.27E-09 | 2.60E-08 | 3.00E-09 |
| 24h | 3.89E-09  | 6.00E-09 | 1.95E-08 | 4.34E-08 |
| 36h | 2.53E-09  | 1.50E-08 | 1.13E-08 | 7.16E-08 |
| 48h | 1.75E-06  | 3.68E-07 | 1.10E-07 | 3.53E-07 |
| 72h | 8.06E-08  | 7.32E-08 | 4.85E-09 | 1.08E-07 |
|     | cgd4_10   |          |          |          |
| 2h  | 1.89E-07  | 0.00E+00 | 0.00E+00 | 1.20E-06 |
| 6h  | 6.00E-07  | 1.10E-07 | 0.00E+00 | 1.14E-06 |
| 12h | 0.00E+00  | 0.00E+00 | 1.56E-07 | 4.32E-07 |
| 24h | 8.30E-08  | 7.19E-07 | 1.58E-06 | 1.84E-06 |
| 36h | 1.72E-07  | 5.75E-07 | 6.87E-07 | 9.77E-07 |
| 48h | 2.91E-07  | 7.58E-08 | 2.86E-07 | 1.30E-07 |
| 72h | 1.90E-08  | 0.00E+00 | 0.00E+00 | 1.50E-07 |
|     | cgd4_30   |          |          |          |
| 2h  | 0.00E+00  | 2.16E-09 | 0.00E+00 | 1.18E-09 |
| 6h  | 7.51E-10  | 8.09E-10 | 1.41E-09 | 1.77E-10 |
| 12h | 9.60E-10  | 5.25E-09 | 2.10E-08 | 1.73E-08 |
| 24h | 6.85E-09  | 6.37E-09 | 1.84E-08 | 2.08E-08 |
| 36h | 9.92E-09  | 5.26E-08 | 1.24E-08 | 8.08E-08 |
| 48h | 1.12E-07  | 4.83E-08 | 3.52E-08 | 4.46E-08 |
| 72h | 6.25E-09  | 1.32E-09 | 1.13E-08 | 9.93E-09 |
|     | cgd4_40   |          |          |          |
| 2h  | 1.08E-09  | 0.00E+00 | 0.00E+00 | 0.00E+00 |
| 6h  | 0.00E+00  | 0.00E+00 | 0.00E+00 | 0.00E+00 |
| 12h | 4.77E-06  | 1.05E-05 | 1.35E-05 | 3.54E-05 |
| 24h | 1.21E-06  | 3.49E-06 | 4.52E-07 | 1.32E-06 |
| 36h | 3.05E-07  | 7.73E-07 | 6.50E-07 | 9.42E-07 |
| 48h | 6.40E-07  | 2.11E-06 | 1.46E-07 | 2.71E-07 |
| 72h | 4.78E-07  | 8.61E-07 | 1.66E-07 | 2.76E-07 |
|     | cgd4_60   |          |          |          |
| 2h  | 0.00E+00  | 0.00E+00 | 0.00E+00 | 0.00E+00 |
| 6h  | 0.00E+00  | 0.00E+00 | 0.00E+00 | 0.00E+00 |
| 12h | 2.73E-09  | 3.85E-09 | 1.23E-09 | 9.86E-10 |
| 24h | 2.43E-09  | 2.73E-10 | 3.13E-09 | 1.21E-09 |
| 36h | 3.15E-09  | 5.27E-09 | 1.63E-09 | 1.35E-08 |
| 48h | 1.53E-08  | 5.90E-09 | 2.58E-09 | 7.42E-09 |
| 72h | 4.21E-08  | 1.63E-08 | 1.29E-08 | 3.77E-08 |
|     | cgd4_70   |          |          |          |
| 2h  | 1.19E-06  | 3.68E-06 | 5.62E-05 | 6.59E-05 |

|     |           |          |          |          |
|-----|-----------|----------|----------|----------|
| 6h  | 1.10E-07  | 1.17E-06 | 7.08E-06 | 6.59E-06 |
| 12h | 1.44E-08  | 5.69E-06 | 1.20E-05 | 4.14E-05 |
| 24h | 2.35E-06  | 1.38E-06 | 1.18E-05 | 1.37E-05 |
| 36h | 2.50E-06  | 3.20E-05 | 3.52E-06 | 6.43E-06 |
| 48h | 1.46E-05  | 9.72E-07 | 3.75E-06 | 8.04E-06 |
| 72h | 5.51E-07  | 1.18E-06 | 5.50E-07 | 4.94E-06 |
|     | cgd4_80   |          |          |          |
| 2h  | 5.00E-09  | 4.37E-08 | 5.79E-08 | 7.26E-08 |
| 6h  | 0.00E+00  | 0.00E+00 | 0.00E+00 | 0.00E+00 |
| 12h | 6.21E-08  | 1.33E-07 | 9.33E-07 | 2.71E-07 |
| 24h | 9.19E-09  | 2.27E-08 | 5.67E-08 | 7.97E-08 |
| 36h | 6.23E-08  | 4.91E-07 | 2.47E-08 | 4.80E-07 |
| 48h | 4.74E-06  | 7.85E-08 | 6.04E-07 | 6.11E-08 |
| 72h | 5.95E-08  | 4.01E-08 | 9.98E-09 | 9.16E-08 |
|     | cgd4_100  |          |          |          |
| 2h  | 1.78E-07  | 3.01E-09 | 0.00E+00 | 4.59E-09 |
| 6h  | 6.09E-09  | 1.82E-09 | 1.31E-09 | 6.80E-09 |
| 12h | 1.72E-09  | 1.04E-09 | 1.20E-08 | 1.89E-08 |
| 24h | 1.54E-08  | 3.06E-09 | 4.08E-08 | 2.17E-08 |
| 36h | 6.01E-08  | 4.52E-08 | 2.95E-08 | 5.14E-08 |
| 48h | 2.14E-07  | 2.17E-08 | 6.13E-08 | 3.45E-08 |
| 72h | 3.10E-08  | 1.64E-08 | 5.71E-08 | 6.49E-09 |
|     | cgd4_110  |          |          |          |
| 2h  | 1.45E-05  | 1.58E-06 | 1.31E-04 | 1.61E-04 |
| 6h  | 0.00E+00  | 0.00E+00 | 1.38E-06 | 2.70E-06 |
| 12h | 2.91E-06  | 2.68E-06 | 9.73E-06 | 1.44E-05 |
| 24h | 1.17E-05  | 5.83E-07 | 3.86E-05 | 5.86E-05 |
| 36h | 9.47E-06  | 1.80E-05 | 0.00E+00 | 6.36E-05 |
| 48h | 6.06E-05  | 4.29E-06 | 3.23E-06 | 2.34E-05 |
| 72h | 9.72E-06  | 4.67E-06 | 2.46E-06 | 1.70E-05 |
|     | cgd4_120  |          |          |          |
| 2h  | 0.00E+00  | 4.89E-08 | 0.00E+00 | 0.00E+00 |
| 6h  | 4.30E-08  | 1.39E-07 | 5.21E-08 | 2.81E-07 |
| 12h | 0.00E+00  | 1.22E-08 | 6.98E-09 | 1.75E-08 |
| 24h | 1.66E-07  | 2.33E-08 | 3.27E-08 | 4.30E-08 |
| 36h | 1.73E-07  | 1.02E-07 | 2.56E-08 | 4.81E-08 |
| 48h | 5.09E-08  | 1.44E-08 | 1.65E-08 | 2.07E-08 |
| 72h | 1.50E-08  | 6.15E-09 | 1.38E-08 | 3.04E-09 |
|     | cgd1_3300 |          |          |          |
| 2h  | 1.59E-05  | 8.53E-06 | 2.50E-05 | 4.05E-07 |
| 6h  | 2.36E-05  | 4.25E-05 | 6.36E-05 | 3.01E-06 |
| 12h | 3.05E-06  | 2.46E-05 | 5.41E-07 | 1.84E-07 |
| 24h | 7.27E-06  | 3.85E-06 | 3.76E-04 | 9.52E-06 |
| 36h | 6.76E-06  | 4.93E-06 | 1.12E-05 | 2.88E-06 |
| 48h | 1.11E-05  | 1.20E-05 | 3.31E-05 | 1.59E-05 |
| 72h | 2.47E-06  | 3.69E-06 | 4.03E-06 | 9.46E-06 |
|     | cgd1_3310 |          |          |          |
| 2h  | 2.70E-08  | 3.48E-09 | 4.22E-08 | 4.16E-08 |
| 6h  | 3.55E-08  | 5.12E-08 | 4.38E-08 | 4.18E-08 |
| 12h | 5.21E-09  | 8.76E-09 | 1.71E-10 | 0.00E+00 |
| 24h | 3.55E-08  | 1.19E-08 | 5.09E-08 | 2.09E-08 |
| 36h | 6.73E-08  | 2.50E-08 | 1.88E-08 | 3.10E-08 |
| 48h | 2.09E-08  | 8.82E-09 | 8.28E-08 | 3.44E-08 |

|     |           |          |          |          |
|-----|-----------|----------|----------|----------|
| 72h | 2.16E-08  | 7.93E-09 | 5.18E-09 | 1.52E-08 |
|     | cgd1_3320 |          |          |          |
| 2h  | 1.35E-10  | 1.29E-09 | 2.03E-08 | 0.00E+00 |
| 6h  | 6.18E-08  | 1.00E-07 | 2.47E-07 | 8.06E-08 |
| 12h | 2.45E-09  | 3.18E-09 | 4.17E-10 | 0.00E+00 |
| 24h | 3.40E-08  | 1.93E-08 | 5.14E-08 | 2.83E-08 |
| 36h | 4.59E-08  | 2.97E-08 | 6.19E-08 | 9.59E-08 |
| 48h | 7.55E-08  | 4.34E-08 | 1.39E-07 | 7.02E-08 |
| 72h | 3.45E-08  | 1.21E-08 | 2.64E-08 | 7.23E-08 |
|     | cgd1_3330 |          |          |          |
| 2h  | 0.00E+00  | 2.56E-08 | 0.00E+00 | 0.00E+00 |
| 6h  | 6.79E-09  | 2.63E-08 | 8.12E-08 | 2.95E-08 |
| 12h | 1.98E-09  | 5.65E-09 | 2.33E-10 | 4.97E-09 |
| 24h | 6.27E-08  | 3.54E-09 | 2.38E-08 | 2.00E-08 |
| 36h | 2.16E-08  | 9.10E-09 | 3.62E-08 | 4.91E-08 |
| 48h | 1.00E-08  | 9.43E-09 | 1.00E-07 | 6.71E-08 |
| 72h | 2.19E-08  | 2.70E-08 | 2.66E-08 | 9.57E-08 |
|     | cgd1_3340 |          |          |          |
| 2h  | 4.82E-07  | 3.51E-07 | 5.23E-07 | 4.73E-07 |
| 6h  | 1.04E-07  | 2.38E-07 | 4.77E-07 | 5.12E-07 |
| 12h | 2.94E-07  | 8.63E-07 | 7.32E-08 | 1.70E-06 |
| 24h | 1.99E-07  | 8.25E-08 | 3.37E-07 | 5.20E-07 |
| 36h | 2.41E-07  | 1.52E-07 | 4.53E-07 | 5.49E-07 |
| 48h | 1.61E-07  | 1.71E-07 | 8.58E-07 | 6.42E-07 |
| 72h | 1.73E-07  | 1.17E-07 | 2.03E-07 | 2.92E-07 |
|     | cgd1_3360 |          |          |          |
| 2h  | 3.69E-08  | 6.80E-09 | 7.20E-08 | 5.18E-08 |
| 6h  | 2.40E-08  | 8.88E-08 | 5.10E-08 | 1.87E-07 |
| 12h | 3.25E-08  | 1.57E-08 | 3.45E-09 | 1.32E-08 |
| 24h | 5.36E-08  | 8.61E-09 | 4.51E-08 | 4.44E-08 |
| 36h | 2.99E-08  | 1.27E-08 | 2.95E-08 | 2.51E-08 |
| 48h | 3.58E-08  | 4.01E-08 | 4.03E-07 | 1.58E-07 |
| 72h | 3.62E-07  | 1.38E-07 | 9.08E-07 | 2.00E-06 |
|     | cgd1_3400 |          |          |          |
| 2h  | 3.84E-04  | 1.94E-04 | 4.79E-04 | 5.52E-06 |
| 6h  | 2.83E-04  | 7.37E-04 | 4.94E-04 | 1.03E-03 |
| 12h | 6.32E-04  | 8.42E-04 | 2.40E-05 | 1.02E-03 |
| 24h | 1.01E-03  | 5.73E-04 | 5.84E-04 | 2.27E-03 |
| 36h | 2.33E-04  | 2.94E-04 | 8.62E-05 | 6.36E-04 |
| 48h | 2.13E-04  | 1.03E-04 | 2.33E-03 | 2.36E-04 |
| 72h | 4.71E-04  | 9.92E-05 | 5.45E-04 | 2.77E-04 |
|     | cgd1_3410 |          |          |          |
| 2h  | 0.00E+00  | 0.00E+00 | 0.00E+00 | 0.00E+00 |
| 6h  | 1.49E-08  | 1.36E-08 | 3.94E-07 | 5.80E-07 |
| 12h | 5.39E-09  | 4.25E-08 | 8.65E-10 | 0.00E+00 |
| 24h | 3.62E-07  | 6.64E-08 | 1.28E-07 | 2.00E-07 |
| 36h | 5.96E-07  | 2.16E-07 | 5.23E-07 | 7.73E-07 |
| 48h | 2.20E-07  | 1.67E-07 | 9.52E-07 | 6.58E-07 |
| 72h | 2.96E-07  | 1.69E-07 | 3.32E-07 | 2.00E-07 |
|     | cgd1_3420 |          |          |          |
| 2h  | 6.63E-09  | 1.95E-08 | 3.51E-08 | 0.00E+00 |
| 6h  | 1.99E-08  | 3.73E-08 | 8.98E-08 | 3.08E-10 |
| 12h | 4.71E-09  | 5.82E-09 | 3.62E-10 | 6.12E-09 |

|     |           |          |          |          |
|-----|-----------|----------|----------|----------|
| 24h | 1.22E-08  | 4.94E-09 | 7.96E-09 | 2.13E-08 |
| 36h | 4.67E-08  | 3.10E-08 | 5.23E-08 | 6.13E-08 |
| 48h | 5.25E-08  | 3.91E-08 | 6.93E-08 | 4.33E-08 |
| 72h | 4.17E-08  | 3.39E-08 | 8.32E-08 | 4.06E-08 |
|     | cgd1_3450 |          |          |          |
| 2h  | 4.96E-08  | 1.95E-08 | 3.81E-08 | 9.50E-08 |
| 6h  | 8.28E-10  | 0.00E+00 | 7.25E-09 | 0.00E+00 |
| 12h | 1.15E-07  | 1.44E-07 | 1.03E-08 | 8.98E-08 |
| 24h | 1.19E-07  | 8.57E-08 | 1.51E-08 | 1.38E-08 |
| 36h | 9.95E-08  | 3.84E-08 | 1.88E-07 | 9.08E-08 |
| 48h | 5.14E-08  | 4.89E-08 | 2.40E-07 | 1.67E-07 |
| 72h | 2.58E-07  | 4.54E-08 | 1.72E-07 | 8.44E-08 |
|     | cgd1_3470 |          |          |          |
| 2h  | 0.00E+00  | 0.00E+00 | 2.21E-09 | 0.00E+00 |
| 6h  | 6.84E-09  | 2.72E-08 | 8.05E-08 | 3.10E-08 |
| 12h | 1.35E-08  | 0.00E+00 | 0.00E+00 | 0.00E+00 |
| 24h | 7.96E-08  | 1.93E-08 | 1.15E-07 | 6.89E-08 |
| 36h | 5.02E-08  | 1.20E-07 | 3.79E-07 | 4.25E-07 |
| 48h | 4.15E-07  | 1.30E-07 | 6.33E-07 | 3.08E-07 |
| 72h | 3.42E-07  | 2.57E-07 | 7.22E-07 | 5.44E-07 |
|     | cgd1_3500 |          |          |          |
| 2h  | 3.90E-09  | 4.61E-10 | 5.60E-09 | 0.00E+00 |
| 6h  | 1.48E-09  | 2.52E-10 | 8.65E-08 | 0.00E+00 |
| 12h | 1.47E-07  | 1.11E-07 | 3.43E-09 | 8.44E-08 |
| 24h | 3.63E-07  | 1.93E-08 | 1.31E-07 | 1.59E-08 |
| 36h | 1.87E-06  | 4.93E-07 | 2.73E-06 | 2.39E-06 |
| 48h | 5.42E-07  | 7.19E-07 | 2.06E-06 | 1.10E-06 |
| 72h | 2.34E-06  | 5.81E-07 | 2.42E-06 | 1.53E-06 |
|     | cgd1_3510 |          |          |          |
| 2h  | 0.00E+00  | 0.00E+00 | 0.00E+00 | 0.00E+00 |
| 6h  | 0.00E+00  | 0.00E+00 | 0.00E+00 | 0.00E+00 |
| 12h | 9.62E-05  | 6.26E-05 | 3.64E-04 | 9.64E-05 |
| 24h | 3.79E-05  | 8.67E-05 | 2.28E-04 | 1.27E-05 |
| 36h | 6.26E-05  | 1.81E-04 | 9.05E-04 | 9.59E-05 |
| 48h | 1.03E-04  | 1.45E-04 | 7.61E-04 | 3.97E-05 |
| 72h | 2.65E-04  | 2.11E-04 | 1.67E-03 | 9.49E-05 |
|     | cgd1_3530 |          |          |          |
| 2h  | 9.16E-03  | 4.87E-03 | 1.45E-02 | 6.09E-03 |
| 6h  | 1.83E-02  | 2.95E-02 | 7.53E-02 | 7.90E-03 |
| 12h | 2.84E-03  | 8.89E-03 | 1.32E-02 | 7.43E-04 |
| 24h | 3.60E-03  | 9.43E-03 | 3.67E-02 | 1.30E-03 |
| 36h | 3.28E-03  | 5.35E-03 | 1.75E-02 | 2.86E-03 |
| 48h | 8.41E-04  | 9.47E-04 | 7.02E-03 | 4.39E-04 |
| 72h | 7.45E-04  | 2.25E-04 | 1.35E-03 | 2.19E-04 |
|     | cgd1_3540 |          |          |          |
| 2h  | 1.16E-03  | 9.77E-04 | 5.15E-03 | 2.00E-03 |
| 6h  | 2.93E-03  | 1.38E-03 | 1.12E-02 | 6.22E-04 |
| 12h | 3.37E-04  | 1.66E-03 | 3.96E-03 | 1.18E-04 |
| 24h | 2.64E-04  | 7.64E-04 | 8.23E-03 | 2.63E-04 |
| 36h | 3.46E-04  | 6.73E-04 | 2.59E-03 | 5.61E-04 |
| 48h | 9.59E-05  | 1.74E-04 | 1.41E-03 | 1.24E-04 |
| 72h | 1.90E-04  | 1.81E-04 | 1.23E-03 | 2.00E-04 |
|     | cgd1_3560 |          |          |          |

|     |           |          |          |          |
|-----|-----------|----------|----------|----------|
| 2h  | 0.00E+00  | 0.00E+00 | 0.00E+00 | 0.00E+00 |
| 6h  | 0.00E+00  | 0.00E+00 | 0.00E+00 | 0.00E+00 |
| 12h | 1.69E-09  | 0.00E+00 | 0.00E+00 | 0.00E+00 |
| 24h | 6.51E-09  | 2.56E-11 | 6.83E-11 | 0.00E+00 |
| 36h | 1.05E-07  | 5.93E-17 | 2.24E-10 | 2.06E-07 |
| 48h | 4.87E-06  | 2.58E-07 | 1.41E-06 | 3.95E-06 |
| 72h | 1.90E-06  | 3.83E-10 | 6.77E-07 | 3.58E-06 |
|     | cgd1_3570 |          |          |          |
| 2h  | 6.23E-08  | 1.69E-08 | 3.56E-06 | 6.93E-08 |
| 6h  | 0.00E+00  | 0.00E+00 | 0.00E+00 | 4.71E-08 |
| 12h | 1.99E-03  | 8.32E-04 | 2.21E-03 | 1.26E-03 |
| 24h | 5.47E-05  | 1.73E-05 | 1.87E-04 | 4.10E-05 |
| 36h | 3.50E-05  | 1.56E-04 | 5.52E-04 | 2.26E-05 |
| 48h | 1.07E-05  | 2.87E-05 | 1.40E-04 | 2.09E-05 |
| 72h | 6.70E-06  | 3.21E-06 | 1.41E-05 | 1.55E-06 |
|     | cgd1_3580 |          |          |          |
| 2h  | 0.00E+00  | 0.00E+00 | 0.00E+00 | 0.00E+00 |
| 6h  | 0.00E+00  | 0.00E+00 | 4.10E-08 | 0.00E+00 |
| 12h | 6.21E-05  | 7.74E-05 | 1.08E-04 | 5.38E-05 |
| 24h | 1.43E-05  | 1.25E-05 | 3.69E-05 | 9.80E-06 |
| 36h | 1.71E-05  | 6.47E-05 | 2.65E-04 | 1.47E-05 |
| 48h | 1.04E-05  | 1.64E-05 | 7.58E-05 | 4.41E-06 |
| 72h | 6.92E-07  | 7.67E-07 | 7.38E-06 | 2.64E-07 |
|     | cgd1_3590 |          |          |          |
| 2h  | 0.00E+00  | 0.00E+00 | 5.62E-10 | 0.00E+00 |
| 6h  | 0.00E+00  | 0.00E+00 | 0.00E+00 | 0.00E+00 |
| 12h | 6.64E-07  | 8.89E-07 | 2.38E-07 | 3.48E-07 |
| 24h | 1.71E-07  | 1.86E-07 | 3.81E-07 | 1.86E-07 |
| 36h | 7.12E-07  | 1.46E-06 | 1.72E-06 | 3.55E-07 |
| 48h | 7.19E-07  | 1.49E-06 | 4.97E-07 | 3.82E-07 |
| 72h | 1.28E-07  | 6.69E-08 | 1.74E-07 | 7.16E-08 |
|     | cgd1_3600 |          |          |          |
| 2h  | 8.68E-07  | 1.14E-08 | 2.59E-07 | 1.60E-07 |
| 6h  | 6.96E-08  | 0.00E+00 | 1.29E-08 | 4.82E-09 |
| 12h | 1.09E-06  | 2.48E-07 | 3.81E-07 | 3.89E-07 |
| 24h | 6.07E-07  | 8.55E-07 | 5.20E-07 | 3.65E-07 |
| 36h | 6.79E-07  | 7.47E-07 | 1.10E-06 | 2.25E-07 |
| 48h | 1.37E-06  | 1.66E-06 | 1.58E-06 | 3.57E-07 |
| 72h | 8.40E-07  | 4.63E-07 | 2.23E-06 | 4.39E-07 |
|     | cgd1_3610 |          |          |          |
| 2h  | 6.54E-05  | 4.38E-05 | 2.31E-04 | 4.94E-05 |
| 6h  | 2.52E-05  | 2.18E-05 | 8.43E-05 | 2.72E-05 |
| 12h | 3.24E-05  | 5.94E-05 | 6.16E-05 | 1.16E-05 |
| 24h | 3.76E-05  | 7.17E-05 | 6.20E-05 | 1.11E-05 |
| 36h | 1.89E-05  | 2.18E-05 | 8.43E-05 | 9.67E-06 |
| 48h | 1.44E-05  | 2.87E-05 | 1.04E-04 | 4.08E-06 |
| 72h | 2.88E-06  | 4.03E-06 | 1.38E-05 | 2.23E-06 |
|     | cgd1_3620 |          |          |          |
| 2h  | 2.23E-02  | 1.23E-02 | 3.90E-04 | 5.74E-03 |
| 6h  | 2.13E-03  | 6.57E-03 | 2.04E-03 | 2.92E-03 |
| 12h | 2.53E-04  | 2.46E-03 | 4.53E-04 | 1.02E-05 |
| 24h | 6.58E-04  | 2.47E-03 | 2.92E-04 | 7.54E-04 |
| 36h | 2.49E-03  | 1.04E-03 | 4.25E-04 | 1.19E-03 |



|           |          |          |          |          |
|-----------|----------|----------|----------|----------|
| 48h       | 1.39E-03 | 1.28E-03 | 2.19E-04 | 3.28E-04 |
| 72h       | 4.86E-04 | 1.22E-03 | 1.26E-05 | 7.06E-04 |
| cgd1_3630 |          |          |          |          |
| 2h        | 2.51E-06 | 5.10E-07 | 1.25E-06 | 3.13E-07 |
| 6h        | 2.23E-07 | 8.99E-07 | 1.97E-06 | 1.94E-06 |
| 12h       | 6.24E-06 | 3.21E-06 | 1.27E-05 | 3.85E-06 |
| 24h       | 4.81E-06 | 8.30E-07 | 1.22E-05 | 1.30E-05 |
| 36h       | 6.72E-06 | 5.91E-06 | 3.55E-05 | 4.24E-05 |
| 48h       | 1.02E-05 | 2.02E-06 | 8.60E-06 | 1.80E-05 |
| 72h       | 2.02E-06 | 1.01E-06 | 2.36E-06 | 2.76E-06 |
| cgd1_3640 |          |          |          |          |
| 2h        | 4.94E-03 | 9.34E-03 | 2.45E-04 | 3.95E-04 |
| 6h        | 1.60E-02 | 3.49E-03 | 4.63E-04 | 8.89E-04 |
| 12h       | 4.17E-02 | 5.20E-02 | 8.94E-04 | 7.38E-04 |
| 24h       | 7.15E-03 | 5.38E-03 | 2.90E-04 | 2.59E-04 |
| 36h       | 1.79E-02 | 4.57E-03 | 2.91E-04 | 8.88E-04 |
| 48h       | 1.10E-03 | 2.82E-03 | 1.60E-04 | 1.71E-04 |
| 72h       | 3.91E-03 | 8.41E-04 | 3.49E-05 | 1.72E-04 |
| cgd4_130  |          |          |          |          |
| 2h        | 0.00E+00 | 0.00E+00 | 0.00E+00 | 0.00E+00 |
| 6h        | 0.00E+00 | 0.00E+00 | 0.00E+00 | 0.00E+00 |
| 12h       | 0.00E+00 | 5.20E-08 | 2.94E-08 | 0.00E+00 |
| 24h       | 0.00E+00 | 2.00E-09 | 0.00E+00 | 1.26E-08 |
| 36h       | 2.31E-09 | 9.36E-07 | 0.00E+00 | 5.28E-07 |
| 48h       | 2.15E-05 | 2.41E-05 | 1.99E-05 | 3.58E-05 |
| 72h       | 2.66E-07 | 1.65E-06 | 1.74E-06 | 1.46E-06 |
| cgd4_150  |          |          |          |          |
| 2h        | 0.00E+00 | 5.03E-09 | 0.00E+00 | 8.73E-09 |
| 6h        | 2.38E-09 | 0.00E+00 | 0.00E+00 | 8.48E-09 |
| 12h       | 6.58E-09 | 1.00E-10 | 2.57E-09 | 4.02E-09 |
| 24h       | 9.36E-10 | 9.62E-10 | 7.32E-09 | 1.29E-08 |
| 36h       | 1.02E-08 | 9.77E-09 | 6.36E-09 | 1.06E-08 |
| 48h       | 5.03E-08 | 9.71E-09 | 7.88E-09 | 3.12E-09 |
| 72h       | 2.76E-09 | 7.15E-09 | 1.15E-08 | 9.58E-09 |
| cgd4_160  |          |          |          |          |
| 2h        | 5.09E-08 | 2.55E-06 | 4.31E-07 | 1.10E-05 |
| 6h        | 3.64E-09 | 2.46E-07 | 7.57E-08 | 2.10E-07 |
| 12h       | 4.11E-08 | 7.65E-07 | 1.35E-06 | 1.28E-06 |
| 24h       | 3.41E-08 | 1.65E-07 | 1.14E-07 | 4.74E-07 |
| 36h       | 7.61E-08 | 2.58E-07 | 4.05E-08 | 2.92E-07 |
| 48h       | 2.07E-06 | 2.46E-07 | 3.52E-07 | 5.24E-07 |
| 72h       | 3.08E-08 | 9.70E-08 | 5.37E-08 | 1.57E-07 |
| cgd4_190  |          |          |          |          |
| 2h        | 0.00E+00 | 0.00E+00 | 0.00E+00 | 0.00E+00 |
| 6h        | 1.82E-05 | 7.93E-06 | 4.19E-05 | 5.44E-06 |
| 12h       | 4.81E-06 | 6.41E-06 | 9.35E-06 | 7.27E-06 |
| 24h       | 1.73E-06 | 2.12E-06 | 6.22E-05 | 5.98E-06 |
| 36h       | 1.64E-05 | 2.12E-05 | 1.41E-04 | 3.19E-05 |
| 48h       | 2.13E-05 | 1.23E-05 | 2.61E-05 | 4.29E-06 |
| 72h       | 2.55E-05 | 1.28E-05 | 7.99E-05 | 2.26E-06 |
| cgd4_210  |          |          |          |          |
| 2h        | 0.00E+00 | 0.00E+00 | 0.00E+00 | 0.00E+00 |
| 6h        | 2.29E-08 | 5.33E-08 | 8.73E-08 | 4.66E-07 |

|     |          |          |          |          |
|-----|----------|----------|----------|----------|
| 12h | 0.00E+00 | 3.50E-09 | 3.19E-10 | 5.37E-09 |
| 24h | 5.14E-09 | 3.95E-08 | 1.32E-07 | 2.14E-07 |
| 36h | 1.45E-07 | 1.41E-07 | 7.75E-08 | 6.16E-07 |
| 48h | 1.97E-06 | 5.73E-07 | 3.37E-07 | 3.34E-07 |
| 72h | 7.06E-09 | 2.55E-08 | 3.52E-08 | 1.61E-07 |
|     | cgd4_230 |          |          |          |
| 2h  | 0.00E+00 | 0.00E+00 | 0.00E+00 | 0.00E+00 |
| 6h  | 0.00E+00 | 0.00E+00 | 0.00E+00 | 0.00E+00 |
| 12h | 5.44E-09 | 4.84E-09 | 6.02E-10 | 2.63E-08 |
| 24h | 6.58E-10 | 9.48E-10 | 5.13E-09 | 2.18E-09 |
| 36h | 4.01E-09 | 1.31E-08 | 4.04E-09 | 1.64E-07 |
| 48h | 3.79E-07 | 3.48E-08 | 1.69E-08 | 4.30E-08 |
| 72h | 1.00E-09 | 2.46E-09 | 1.34E-09 | 2.74E-08 |
|     | cgd4_240 |          |          |          |
| 2h  | 0.00E+00 | 0.00E+00 | 0.00E+00 | 0.00E+00 |
| 6h  | 0.00E+00 | 5.68E-08 | 0.00E+00 | 0.00E+00 |
| 12h | 4.69E-07 | 1.23E-06 | 1.50E-06 | 9.36E-07 |
| 24h | 2.51E-07 | 4.08E-07 | 5.16E-07 | 3.51E-07 |
| 36h | 3.70E-07 | 2.61E-07 | 1.31E-06 | 9.81E-07 |
| 48h | 3.99E-07 | 5.51E-07 | 3.28E-07 | 8.35E-07 |
| 72h | 1.53E-08 | 2.39E-08 | 3.24E-08 | 1.04E-08 |
|     | cgd4_250 |          |          |          |
| 2h  | 0.00E+00 | 2.82E-09 | 8.07E-08 | 1.15E-07 |
| 6h  | 1.19E-08 | 1.84E-07 | 9.51E-08 | 2.04E-06 |
| 12h | 2.79E-08 | 7.19E-09 | 2.60E-09 | 4.73E-08 |
| 24h | 1.24E-07 | 1.22E-07 | 5.73E-07 | 1.62E-06 |
| 36h | 5.30E-07 | 6.96E-07 | 2.79E-07 | 1.96E-06 |
| 48h | 4.36E-06 | 4.64E-07 | 2.31E-07 | 6.62E-07 |
| 72h | 4.21E-08 | 5.21E-08 | 3.88E-08 | 1.33E-07 |
|     | cgd4_260 |          |          |          |
| 2h  | 0.00E+00 | 0.00E+00 | 0.00E+00 | 2.69E-06 |
| 6h  | 5.93E-07 | 2.82E-05 | 3.47E-04 | 1.46E-04 |
| 12h | 1.25E-06 | 2.90E-06 | 1.71E-05 | 5.86E-06 |
| 24h | 5.83E-07 | 2.40E-05 | 1.86E-04 | 1.08E-04 |
| 36h | 4.76E-06 | 4.55E-04 | 3.81E-05 | 1.29E-04 |
| 48h | 5.90E-05 | 6.51E-05 | 1.15E-04 | 1.12E-04 |
| 72h | 8.13E-06 | 1.03E-05 | 2.55E-05 | 2.97E-05 |
|     | cgd4_280 |          |          |          |
| 2h  | 1.81E-05 | 2.71E-06 | 2.14E-06 | 3.10E-06 |
| 6h  | 4.70E-08 | 3.18E-07 | 1.49E-05 | 1.24E-05 |
| 12h | 1.71E-07 | 6.99E-07 | 6.30E-06 | 1.21E-06 |
| 24h | 1.13E-06 | 1.80E-05 | 3.54E-05 | 1.89E-05 |
| 36h | 3.84E-07 | 8.26E-06 | 9.95E-07 | 7.08E-06 |
| 48h | 6.22E-05 | 3.09E-05 | 1.00E-05 | 1.95E-05 |
| 72h | 1.36E-06 | 3.20E-06 | 2.54E-06 | 6.05E-06 |
|     | cgd4_290 |          |          |          |
| 2h  | 2.07E-08 | 1.06E-08 | 0.00E+00 | 1.51E-07 |
| 6h  | 2.07E-08 | 1.39E-07 | 9.39E-08 | 7.58E-07 |
| 12h | 1.66E-07 | 1.04E-07 | 1.04E-07 | 5.73E-07 |
| 24h | 5.06E-08 | 1.39E-08 | 4.91E-08 | 4.30E-07 |
| 36h | 1.44E-07 | 1.16E-07 | 1.21E-07 | 1.33E-06 |
| 48h | 1.71E-07 | 9.28E-08 | 6.28E-08 | 2.26E-06 |
| 72h | 3.96E-08 | 3.92E-08 | 4.57E-08 | 9.77E-08 |

|     |          |          |          |          |
|-----|----------|----------|----------|----------|
|     | cgd4_300 |          |          |          |
| 2h  | 0.00E+00 | 1.42E-06 | 0.00E+00 | 1.22E-05 |
| 6h  | 1.88E-07 | 1.07E-06 | 2.64E-07 | 2.25E-06 |
| 12h | 1.25E-07 | 5.66E-07 | 4.68E-07 | 1.34E-05 |
| 24h | 4.00E-07 | 2.52E-06 | 4.42E-07 | 1.50E-06 |
| 36h | 6.32E-07 | 3.89E-06 | 2.32E-06 | 4.89E-06 |
| 48h | 1.95E-06 | 1.33E-06 | 2.28E-07 | 3.01E-06 |
| 72h | 1.70E-06 | 3.24E-06 | 8.64E-07 | 1.06E-05 |
|     | cgd4_310 |          |          |          |
| 2h  | 0.00E+00 | 4.14E-07 | 1.01E-06 | 0.00E+00 |
| 6h  | 8.39E-07 | 9.06E-07 | 1.55E-06 | 4.32E-06 |
| 12h | 0.00E+00 | 1.21E-07 | 3.50E-07 | 4.43E-07 |
| 24h | 1.64E-07 | 1.37E-06 | 4.40E-07 | 5.13E-06 |
| 36h | 4.55E-07 | 8.04E-06 | 4.42E-06 | 6.76E-06 |
| 48h | 6.23E-06 | 2.94E-06 | 3.13E-06 | 3.87E-06 |
| 72h | 4.92E-07 | 1.25E-06 | 1.50E-06 | 1.95E-06 |
|     | cgd4_340 |          |          |          |
| 2h  | 1.59E-08 | 3.54E-07 | 0.00E+00 | 1.00E-05 |
| 6h  | 0.00E+00 | 3.11E-09 | 2.94E-07 | 1.27E-05 |
| 12h | 0.00E+00 | 2.50E-07 | 1.18E-07 | 1.81E-06 |
| 24h | 1.49E-07 | 8.45E-07 | 1.53E-06 | 4.58E-06 |
| 36h | 3.91E-07 | 6.14E-06 | 6.46E-06 | 6.11E-06 |
| 48h | 1.16E-05 | 3.67E-06 | 1.83E-06 | 2.19E-06 |
| 72h | 1.22E-07 | 1.25E-06 | 1.88E-06 | 1.16E-06 |
|     | cgd4_360 |          |          |          |
| 2h  | 0.00E+00 | 1.53E-08 | 0.00E+00 | 2.28E-07 |
| 6h  | 8.34E-08 | 2.20E-07 | 6.83E-08 | 3.71E-07 |
| 12h | 0.00E+00 | 1.03E-08 | 6.90E-10 | 2.32E-08 |
| 24h | 3.28E-08 | 7.51E-08 | 8.28E-09 | 4.70E-07 |
| 36h | 5.86E-08 | 4.89E-07 | 4.45E-07 | 8.29E-07 |
| 48h | 1.38E-06 | 6.93E-07 | 5.43E-07 | 5.62E-07 |
| 72h | 2.39E-07 | 1.97E-07 | 3.56E-07 | 2.74E-07 |
|     | cgd4_370 |          |          |          |
| 2h  | 4.11E-08 | 9.38E-09 | 0.00E+00 | 2.72E-07 |
| 6h  | 2.62E-08 | 1.17E-08 | 4.33E-09 | 1.36E-07 |
| 12h | 0.00E+00 | 2.65E-09 | 9.24E-09 | 7.24E-09 |
| 24h | 2.32E-09 | 2.52E-08 | 1.10E-08 | 2.38E-07 |
| 36h | 1.00E-08 | 1.60E-07 | 2.93E-07 | 5.63E-07 |
| 48h | 7.75E-07 | 4.26E-07 | 2.71E-07 | 4.20E-07 |
| 72h | 4.44E-08 | 3.35E-07 | 2.85E-07 | 3.76E-07 |
|     | cgd4_390 |          |          |          |
| 2h  | 0.00E+00 | 0.00E+00 | 0.00E+00 | 7.15E-11 |
| 6h  | 3.29E-08 | 4.34E-08 | 2.93E-08 | 5.15E-08 |
| 12h | 7.80E-09 | 1.51E-10 | 3.67E-10 | 4.83E-09 |
| 24h | 7.77E-09 | 9.82E-09 | 2.28E-08 | 6.32E-08 |
| 36h | 5.09E-08 | 2.60E-08 | 2.01E-08 | 4.25E-08 |
| 48h | 4.65E-08 | 2.28E-08 | 5.31E-08 | 7.17E-08 |
| 72h | 1.85E-08 | 3.13E-08 | 8.07E-09 | 5.40E-09 |
|     | cgd4_420 |          |          |          |
| 2h  | 2.55E-04 | 2.85E-04 | 2.60E-04 | 8.28E-04 |
| 6h  | 1.70E-04 | 1.76E-04 | 2.61E-04 | 4.69E-04 |
| 12h | 2.77E-05 | 1.26E-04 | 1.72E-04 | 2.27E-04 |
| 24h | 1.63E-04 | 3.02E-06 | 4.44E-04 | 4.10E-04 |

|     |          |          |          |          |
|-----|----------|----------|----------|----------|
| 36h | 9.55E-05 | 6.59E-05 | 3.92E-05 | 3.63E-04 |
| 48h | 1.45E-04 | 2.65E-05 | 6.96E-05 | 2.69E-04 |
| 72h | 6.55E-05 | 1.31E-05 | 1.82E-04 | 2.46E-04 |
|     | cgd4_440 |          |          |          |
| 2h  | 1.81E-09 | 2.58E-09 | 1.03E-09 | 9.69E-08 |
| 6h  | 7.87E-09 | 1.11E-09 | 1.24E-08 | 1.20E-07 |
| 12h | 1.80E-08 | 1.41E-09 | 9.08E-10 | 6.35E-09 |
| 24h | 1.06E-08 | 3.14E-09 | 2.18E-09 | 1.15E-07 |
| 36h | 6.53E-09 | 6.75E-08 | 1.94E-07 | 5.74E-08 |
| 48h | 2.33E-07 | 6.70E-08 | 4.93E-08 | 6.27E-08 |
| 72h | 4.78E-08 | 1.54E-08 | 8.77E-08 | 6.52E-08 |
|     | cgd4_450 |          |          |          |
| 2h  | 1.66E-06 | 0.00E+00 | 2.40E-05 | 1.36E-05 |
| 6h  | 7.20E-06 | 5.18E-05 | 2.46E-05 | 5.29E-05 |
| 12h | 5.47E-06 | 3.80E-05 | 5.75E-06 | 6.65E-05 |
| 24h | 2.17E-05 | 1.38E-05 | 9.77E-06 | 3.42E-05 |
| 36h | 3.52E-05 | 3.93E-04 | 3.34E-04 | 2.30E-04 |
| 48h | 2.94E-04 | 3.44E-04 | 7.82E-05 | 8.33E-05 |
| 72h | 4.35E-04 | 2.75E-04 | 3.79E-04 | 4.86E-04 |
|     | cgd4_460 |          |          |          |
| 2h  | 1.54E-08 | 9.75E-10 | 1.29E-08 | 9.39E-09 |
| 6h  | 6.75E-08 | 3.16E-08 | 1.38E-08 | 7.55E-08 |
| 12h | 1.69E-09 | 8.06E-09 | 3.02E-09 | 2.39E-08 |
| 24h | 4.67E-08 | 6.18E-09 | 7.25E-09 | 8.92E-08 |
| 36h | 3.60E-08 | 1.74E-08 | 1.03E-07 | 1.18E-07 |
| 48h | 7.03E-08 | 1.46E-08 | 2.74E-08 | 2.12E-08 |
| 72h | 5.15E-09 | 4.02E-09 | 4.02E-09 | 7.93E-09 |
|     | cgd4_470 |          |          |          |
| 2h  | 7.59E-08 | 8.70E-09 | 1.16E-07 | 9.01E-08 |
| 6h  | 1.21E-06 | 3.53E-07 | 4.49E-07 | 2.60E-07 |
| 12h | 1.11E-06 | 8.17E-08 | 2.18E-07 | 9.94E-08 |
| 24h | 2.84E-06 | 3.33E-07 | 2.59E-07 | 4.12E-07 |
| 36h | 1.01E-06 | 1.61E-07 | 1.33E-07 | 1.63E-07 |
| 48h | 1.58E-07 | 1.00E-07 | 2.67E-07 | 5.55E-08 |
| 72h | 1.33E-07 | 3.81E-08 | 1.54E-08 | 3.56E-08 |
|     | cgd4_480 |          |          |          |
| 2h  | 0.00E+00 | 0.00E+00 | 2.44E-08 | 1.58E-08 |
| 6h  | 3.96E-07 | 8.90E-09 | 4.43E-09 | 2.09E-07 |
| 12h | 0.00E+00 | 2.80E-09 | 6.28E-10 | 9.92E-08 |
| 24h | 1.22E-08 | 3.73E-08 | 1.44E-08 | 1.89E-07 |
| 36h | 2.70E-08 | 2.35E-07 | 1.22E-06 | 1.17E-06 |
| 48h | 4.93E-07 | 2.19E-07 | 4.09E-07 | 2.44E-07 |
| 72h | 3.86E-07 | 2.09E-07 | 4.09E-07 | 2.42E-07 |
|     | cgd4_490 |          |          |          |
| 2h  | 5.52E-08 | 2.51E-07 | 1.13E-08 | 4.21E-06 |
| 6h  | 4.32E-08 | 1.21E-08 | 5.75E-09 | 6.17E-07 |
| 12h | 1.53E-07 | 4.30E-08 | 1.06E-07 | 5.97E-07 |
| 24h | 1.26E-08 | 4.07E-08 | 8.31E-08 | 6.10E-07 |
| 36h | 1.24E-07 | 2.66E-06 | 2.32E-06 | 3.06E-06 |
| 48h | 4.60E-07 | 4.44E-07 | 1.60E-06 | 5.31E-07 |
| 72h | 3.31E-07 | 6.47E-07 | 5.07E-07 | 1.51E-06 |
|     | cgd4_500 |          |          |          |
| 2h  | 0.00E+00 | 1.87E-08 | 0.00E+00 | 0.00E+00 |

|          |          |          |          |          |
|----------|----------|----------|----------|----------|
| 6h       | 0.00E+00 | 0.00E+00 | 0.00E+00 | 0.00E+00 |
| 12h      | 0.00E+00 | 0.00E+00 | 0.00E+00 | 9.06E-08 |
| 24h      | 1.57E-10 | 0.00E+00 | 5.29E-09 | 2.62E-07 |
| 36h      | 3.48E-09 | 2.84E-08 | 0.00E+00 | 2.10E-07 |
| 48h      | 5.45E-07 | 6.17E-08 | 2.65E-07 | 1.20E-05 |
| 72h      | 6.10E-07 | 6.41E-07 | 5.84E-06 | 1.18E-05 |
| cgd4_510 |          |          |          |          |
| 2h       | 0.00E+00 | 0.00E+00 | 1.61E-09 | 0.00E+00 |
| 6h       | 2.44E-09 | 5.64E-09 | 1.25E-07 | 9.75E-07 |
| 12h      | 0.00E+00 | 1.87E-09 | 5.92E-09 | 4.21E-08 |
| 24h      | 5.98E-09 | 6.17E-09 | 6.07E-08 | 2.00E-07 |
| 36h      | 9.21E-09 | 6.96E-08 | 3.73E-09 | 4.31E-07 |
| 48h      | 1.58E-07 | 2.72E-08 | 4.41E-08 | 5.58E-08 |
| 72h      | 3.89E-08 | 1.45E-08 | 6.72E-09 | 5.42E-08 |
| cgd4_540 |          |          |          |          |
| 2h       | 3.58E-08 | 1.40E-07 | 2.36E-07 | 1.07E-05 |
| 6h       | 1.75E-08 | 1.18E-07 | 9.12E-08 | 7.13E-07 |
| 12h      | 4.05E-08 | 3.21E-08 | 1.15E-07 | 8.14E-07 |
| 24h      | 4.23E-08 | 4.22E-08 | 1.66E-07 | 3.97E-07 |
| 36h      | 4.98E-08 | 4.21E-07 | 3.71E-08 | 9.04E-07 |
| 48h      | 5.23E-07 | 1.48E-07 | 7.45E-08 | 1.16E-07 |
| 72h      | 2.55E-08 | 1.20E-08 | 8.72E-09 | 7.26E-08 |
| cgd4_550 |          |          |          |          |
| 2h       | 0.00E+00 | 0.00E+00 | 0.00E+00 | 0.00E+00 |
| 6h       | 0.00E+00 | 0.00E+00 | 0.00E+00 | 0.00E+00 |
| 12h      | 9.33E-10 | 5.11E-10 | 0.00E+00 | 2.10E-10 |
| 24h      | 0.00E+00 | 1.61E-10 | 9.53E-11 | 1.71E-10 |
| 36h      | 2.94E-11 | 8.72E-10 | 7.40E-11 | 2.80E-09 |
| 48h      | 4.18E-09 | 2.87E-09 | 2.25E-10 | 1.30E-09 |
| 72h      | 2.66E-09 | 3.07E-09 | 2.34E-10 | 3.64E-09 |
| cgd4_560 |          |          |          |          |
| 2h       | 0.00E+00 | 0.00E+00 | 2.95E-05 | 0.00E+00 |
| 6h       | 0.00E+00 | 0.00E+00 | 0.00E+00 | 0.00E+00 |
| 12h      | 1.89E-05 | 4.15E-08 | 5.16E-05 | 4.98E-06 |
| 24h      | 3.28E-06 | 5.91E-07 | 6.42E-05 | 4.03E-06 |
| 36h      | 5.78E-05 | 4.13E-06 | 1.63E-05 | 1.56E-05 |
| 48h      | 3.57E-05 | 2.43E-05 | 2.18E-05 | 2.38E-05 |
| 72h      | 4.32E-04 | 1.88E-05 | 4.08E-05 | 1.19E-04 |
| cgd4_590 |          |          |          |          |
| 2h       | 2.52E-08 | 1.76E-08 | 2.59E-08 | 4.06E-07 |
| 6h       | 5.97E-07 | 2.92E-07 | 1.12E-07 | 5.69E-07 |
| 12h      | 1.46E-07 | 1.64E-07 | 9.99E-08 | 3.81E-07 |
| 24h      | 7.07E-07 | 1.38E-07 | 2.88E-07 | 1.51E-07 |
| 36h      | 3.37E-07 | 2.67E-07 | 3.99E-07 | 1.41E-06 |
| 48h      | 1.32E-06 | 5.36E-07 | 2.27E-07 | 3.36E-07 |
| 72h      | 1.70E-07 | 7.01E-08 | 9.53E-08 | 1.08E-07 |
| cgd4_600 |          |          |          |          |
| 2h       | 0.00E+00 | 4.02E-10 | 0.00E+00 | 4.97E-10 |
| 6h       | 0.00E+00 | 0.00E+00 | 0.00E+00 | 0.00E+00 |
| 12h      | 3.37E-08 | 6.89E-08 | 2.24E-07 | 8.38E-08 |
| 24h      | 2.87E-09 | 6.40E-09 | 2.92E-08 | 1.60E-08 |
| 36h      | 6.72E-08 | 1.49E-07 | 1.12E-08 | 1.20E-07 |
| 48h      | 5.10E-07 | 1.16E-07 | 2.78E-08 | 1.86E-07 |

|     |          |          |          |          |
|-----|----------|----------|----------|----------|
| 72h | 1.95E-07 | 8.79E-08 | 3.94E-08 | 1.39E-07 |
|     | cgd4_610 |          |          |          |
| 2h  | 0.00E+00 | 4.81E-07 | 3.16E-06 | 2.99E-05 |
| 6h  | 1.59E-07 | 5.27E-07 | 1.55E-06 | 4.65E-06 |
| 12h | 7.87E-07 | 1.43E-07 | 3.40E-06 | 1.38E-05 |
| 24h | 1.06E-06 | 1.30E-07 | 5.86E-06 | 9.47E-06 |
| 36h | 3.71E-07 | 1.65E-06 | 2.45E-07 | 1.65E-05 |
| 48h | 1.48E-05 | 7.92E-07 | 3.06E-06 | 5.92E-06 |
| 72h | 1.85E-06 | 9.57E-07 | 1.83E-06 | 3.99E-06 |
|     | cgd4_640 |          |          |          |
| 2h  | 0.00E+00 | 0.00E+00 | 0.00E+00 | 0.00E+00 |
| 6h  | 0.00E+00 | 0.00E+00 | 0.00E+00 | 6.81E-11 |
| 12h | 0.00E+00 | 1.70E-10 | 5.16E-10 | 9.31E-11 |
| 24h | 0.00E+00 | 3.59E-11 | 0.00E+00 | 1.09E-10 |
| 36h | 0.00E+00 | 6.03E-10 | 0.00E+00 | 5.96E-09 |
| 48h | 2.93E-08 | 4.73E-09 | 2.05E-09 | 1.68E-08 |
| 72h | 7.63E-09 | 8.52E-09 | 2.09E-08 | 4.57E-08 |
|     | cgd4_660 |          |          |          |
| 2h  | 0.00E+00 | 3.34E-08 | 1.23E-08 | 7.75E-08 |
| 6h  | 2.04E-09 | 7.74E-09 | 1.28E-08 | 6.48E-09 |
| 12h | 3.66E-08 | 1.10E-08 | 2.49E-08 | 9.48E-08 |
| 24h | 6.67E-08 | 7.42E-09 | 3.15E-08 | 1.18E-07 |
| 36h | 7.05E-09 | 3.69E-08 | 5.45E-09 | 1.29E-08 |
| 48h | 3.16E-07 | 2.80E-08 | 1.00E-07 | 1.90E-07 |
| 72h | 1.79E-07 | 3.85E-08 | 5.77E-08 | 8.63E-08 |
|     | cgd4_670 |          |          |          |
| 2h  | 0.00E+00 | 0.00E+00 | 0.00E+00 | 0.00E+00 |
| 6h  | 0.00E+00 | 0.00E+00 | 0.00E+00 | 4.13E-10 |
| 12h | 0.00E+00 | 8.01E-10 | 0.00E+00 | 0.00E+00 |
| 24h | 2.23E-09 | 4.95E-10 | 0.00E+00 | 5.90E-09 |
| 36h | 1.39E-08 | 4.78E-09 | 0.00E+00 | 2.39E-08 |
| 48h | 3.98E-06 | 2.12E-07 | 2.83E-06 | 2.35E-06 |
| 72h | 5.32E-06 | 1.24E-06 | 1.21E-05 | 1.28E-05 |
|     | cgd4_680 |          |          |          |
| 2h  | 0.00E+00 | 0.00E+00 | 0.00E+00 | 0.00E+00 |
| 6h  | 0.00E+00 | 0.00E+00 | 0.00E+00 | 0.00E+00 |
| 12h | 0.00E+00 | 1.34E-08 | 2.61E-07 | 5.89E-07 |
| 24h | 2.33E-09 | 9.09E-09 | 5.04E-08 | 8.58E-08 |
| 36h | 4.50E-08 | 3.69E-07 | 1.60E-07 | 4.04E-06 |
| 48h | 9.54E-07 | 4.91E-07 | 2.69E-07 | 7.91E-07 |
| 72h | 3.27E-06 | 3.35E-06 | 5.97E-06 | 1.09E-05 |
|     | cgd4_690 |          |          |          |
| 2h  | 0.00E+00 | 2.44E-06 | 5.35E-09 | 1.24E-06 |
| 6h  | 5.23E-07 | 4.63E-06 | 0.00E+00 | 4.21E-06 |
| 12h | 2.60E-06 | 5.95E-07 | 2.07E-08 | 2.18E-07 |
| 24h | 2.80E-06 | 1.03E-06 | 7.01E-07 | 4.19E-06 |
| 36h | 9.28E-06 | 2.09E-05 | 3.66E-07 | 1.12E-05 |
| 48h | 6.20E-04 | 9.28E-05 | 3.35E-05 | 4.21E-05 |
| 72h | 2.75E-04 | 7.28E-05 | 1.92E-05 | 5.10E-05 |
|     | cgd4_700 |          |          |          |
| 2h  | 0.00E+00 | 0.00E+00 | 0.00E+00 | 4.25E-08 |
| 6h  | 3.51E-06 | 2.77E-06 | 6.58E-08 | 2.02E-06 |
| 12h | 1.20E-06 | 4.33E-05 | 3.34E-07 | 5.20E-07 |

|          |          |          |          |          |
|----------|----------|----------|----------|----------|
| 24h      | 3.79E-06 | 1.22E-05 | 2.19E-07 | 8.08E-07 |
| 36h      | 6.40E-06 | 1.38E-04 | 1.53E-06 | 8.34E-06 |
| 48h      | 1.30E-05 | 9.68E-05 | 2.61E-06 | 3.67E-06 |
| 72h      | 1.68E-05 | 1.33E-04 | 4.88E-06 | 7.78E-06 |
| cgd4_720 |          |          |          |          |
| 2h       | 8.94E-08 | 7.86E-08 | 1.65E-08 | 1.25E-07 |
| 6h       | 4.83E-08 | 2.32E-08 | 2.64E-09 | 5.18E-08 |
| 12h      | 1.72E-08 | 2.13E-07 | 2.21E-08 | 5.60E-08 |
| 24h      | 1.07E-08 | 6.89E-08 | 2.05E-08 | 5.19E-08 |
| 36h      | 3.24E-08 | 1.25E-07 | 9.29E-09 | 3.76E-08 |
| 48h      | 3.03E-09 | 6.48E-08 | 4.55E-09 | 1.13E-08 |
| 72h      | 5.16E-08 | 1.78E-07 | 8.75E-09 | 2.54E-08 |
| cgd4_730 |          |          |          |          |
| 2h       | 0.00E+00 | 0.00E+00 | 0.00E+00 | 3.65E-09 |
| 6h       | 0.00E+00 | 0.00E+00 | 0.00E+00 | 0.00E+00 |
| 12h      | 0.00E+00 | 8.21E-07 | 0.00E+00 | 3.75E-10 |
| 24h      | 0.00E+00 | 0.00E+00 | 0.00E+00 | 1.94E-10 |
| 36h      | 0.00E+00 | 7.29E-08 | 0.00E+00 | 3.01E-09 |
| 48h      | 9.48E-09 | 1.04E-07 | 2.10E-09 | 1.40E-08 |
| 72h      | 5.75E-08 | 0.00E+00 | 4.97E-08 | 6.32E-08 |
| cgd4_740 |          |          |          |          |
| 2h       | 0.00E+00 | 8.05E-08 | 0.00E+00 | 2.69E-08 |
| 6h       | 6.44E-05 | 5.03E-05 | 1.52E-05 | 3.89E-05 |
| 12h      | 8.14E-07 | 6.07E-06 | 4.94E-07 | 7.51E-07 |
| 24h      | 8.71E-05 | 1.54E-05 | 2.70E-05 | 3.82E-05 |
| 36h      | 8.28E-05 | 1.66E-04 | 3.69E-05 | 4.24E-05 |
| 48h      | 1.63E-04 | 5.23E-05 | 4.44E-05 | 1.85E-05 |
| 72h      | 5.60E-06 | 9.52E-06 | 9.31E-07 | 2.75E-06 |
| cgd4_750 |          |          |          |          |
| 2h       | 0.00E+00 | 0.00E+00 | 2.69E-09 | 6.59E-08 |
| 6h       | 0.00E+00 | 0.00E+00 | 2.60E-09 | 1.52E-08 |
| 12h      | 2.97E-09 | 2.24E-09 | 9.01E-09 | 6.68E-09 |
| 24h      | 3.54E-10 | 2.69E-09 | 2.71E-09 | 1.97E-08 |
| 36h      | 8.93E-09 | 9.96E-08 | 2.50E-09 | 3.31E-08 |
| 48h      | 1.14E-07 | 1.76E-07 | 3.45E-08 | 5.11E-07 |
| 72h      | 1.15E-07 | 2.95E-08 | 3.49E-08 | 1.68E-07 |
| cgd4_760 |          |          |          |          |
| 2h       | 8.36E-09 | 3.76E-06 | 1.89E-08 | 3.78E-08 |
| 6h       | 8.58E-08 | 2.19E-07 | 1.63E-08 | 3.18E-09 |
| 12h      | 2.15E-08 | 4.17E-08 | 3.70E-09 | 6.80E-09 |
| 24h      | 1.29E-07 | 1.95E-07 | 1.29E-08 | 3.91E-08 |
| 36h      | 1.48E-07 | 2.29E-07 | 8.81E-08 | 2.85E-08 |
| 48h      | 7.69E-08 | 5.91E-07 | 1.66E-08 | 5.97E-08 |
| 72h      | 5.77E-08 | 1.22E-07 | 1.13E-08 | 2.59E-08 |
| cgd4_770 |          |          |          |          |
| 2h       | 0.00E+00 | 0.00E+00 | 0.00E+00 | 0.00E+00 |
| 6h       | 2.24E-04 | 3.28E-07 | 4.30E-05 | 1.20E-05 |
| 12h      | 0.00E+00 | 2.67E-07 | 1.26E-06 | 2.14E-07 |
| 24h      | 3.38E-06 | 5.74E-07 | 1.40E-06 | 1.08E-05 |
| 36h      | 1.21E-06 | 1.41E-05 | 1.02E-06 | 1.42E-05 |
| 48h      | 2.24E-05 | 1.26E-06 | 4.34E-06 | 1.81E-05 |
| 72h      | 5.46E-06 | 2.28E-07 | 1.52E-06 | 2.42E-06 |
| cgd4_780 |          |          |          |          |

|     |          |          |          |          |
|-----|----------|----------|----------|----------|
| 2h  | 0.00E+00 | 0.00E+00 | 0.00E+00 | 0.00E+00 |
| 6h  | 0.00E+00 | 2.17E-06 | 1.03E-09 | 9.16E-08 |
| 12h | 3.94E-08 | 2.11E-06 | 2.39E-08 | 5.46E-08 |
| 24h | 4.42E-09 | 9.65E-07 | 2.56E-08 | 2.75E-06 |
| 36h | 7.94E-08 | 4.04E-05 | 1.50E-08 | 9.51E-07 |
| 48h | 3.57E-06 | 1.08E-05 | 2.42E-07 | 6.76E-07 |
| 72h | 2.28E-06 | 2.77E-05 | 7.97E-08 | 4.52E-07 |
|     | cgd4_790 |          |          |          |
| 2h  | 9.77E-09 | 0.00E+00 | 2.56E-08 | 0.00E+00 |
| 6h  | 3.28E-08 | 1.53E-06 | 1.61E-07 | 2.01E-07 |
| 12h | 9.65E-09 | 1.36E-07 | 8.36E-10 | 2.35E-08 |
| 24h | 3.70E-08 | 7.19E-07 | 1.68E-07 | 2.77E-07 |
| 36h | 3.33E-08 | 6.21E-06 | 1.30E-08 | 4.90E-07 |
| 48h | 1.87E-06 | 1.90E-05 | 2.42E-07 | 5.35E-07 |
| 72h | 3.02E-07 | 1.44E-06 | 2.14E-08 | 2.23E-07 |
|     | cgd4_820 |          |          |          |
| 2h  | 2.12E-05 | 0.00E+00 | 3.70E-08 | 1.16E-07 |
| 6h  | 4.00E-06 | 7.12E-06 | 3.71E-08 | 5.31E-07 |
| 12h | 9.99E-06 | 1.23E-06 | 3.90E-07 | 5.97E-06 |
| 24h | 1.96E-06 | 6.19E-07 | 2.49E-07 | 8.64E-07 |
| 36h | 4.29E-05 | 6.99E-06 | 3.55E-08 | 8.60E-07 |
| 48h | 2.12E-05 | 1.86E-06 | 1.03E-07 | 3.50E-07 |
| 72h | 1.36E-05 | 1.01E-06 | 5.85E-08 | 5.75E-07 |
|     | cgd4_850 |          |          |          |
| 2h  | 0.00E+00 | 0.00E+00 | 0.00E+00 | 0.00E+00 |
| 6h  | 0.00E+00 | 0.00E+00 | 0.00E+00 | 0.00E+00 |
| 12h | 4.92E-09 | 3.46E-09 | 1.51E-08 | 1.14E-08 |
| 24h | 3.19E-11 | 7.57E-11 | 9.62E-10 | 2.63E-09 |
| 36h | 1.10E-09 | 3.06E-07 | 1.64E-10 | 1.17E-07 |
| 48h | 1.91E-08 | 5.58E-08 | 1.23E-08 | 1.75E-08 |
| 72h | 1.09E-07 | 1.00E-06 | 1.15E-07 | 1.69E-07 |
|     | cgd4_910 |          |          |          |
| 2h  | 0.00E+00 | 5.12E-07 | 2.28E-07 | 0.00E+00 |
| 6h  | 0.00E+00 | 0.00E+00 | 0.00E+00 | 1.12E-05 |
| 12h | 0.00E+00 | 0.00E+00 | 6.09E-07 | 4.04E-06 |
| 24h | 0.00E+00 | 1.23E-08 | 8.32E-08 | 8.25E-07 |
| 36h | 2.41E-07 | 8.91E-08 | 8.10E-08 | 4.61E-07 |
| 48h | 1.83E-05 | 1.98E-05 | 1.28E-04 | 1.42E-04 |
| 72h | 1.92E-05 | 7.61E-06 | 1.59E-05 | 4.53E-05 |
|     | cgd4_920 |          |          |          |
| 2h  | 3.61E-06 | 0.00E+00 | 2.63E-05 | 3.87E-05 |
| 6h  | 1.54E-05 | 1.47E-04 | 2.95E-03 | 1.09E-03 |
| 12h | 3.06E-05 | 1.05E-04 | 1.26E-04 | 4.51E-04 |
| 24h | 2.66E-06 | 8.14E-06 | 5.72E-04 | 5.40E-05 |
| 36h | 7.87E-06 | 4.27E-05 | 2.14E-04 | 4.08E-05 |
| 48h | 9.70E-06 | 6.67E-06 | 2.03E-04 | 1.10E-04 |
| 72h | 6.90E-06 | 3.56E-05 | 5.83E-05 | 1.24E-04 |
|     | cgd4_930 |          |          |          |
| 2h  | 9.70E-09 | 1.02E-08 | 3.51E-07 | 5.65E-07 |
| 6h  | 0.00E+00 | 2.85E-08 | 4.10E-08 | 4.04E-06 |
| 12h | 5.93E-08 | 5.32E-08 | 2.83E-07 | 2.12E-07 |
| 24h | 7.05E-08 | 4.32E-09 | 8.71E-08 | 1.32E-07 |
| 36h | 8.78E-08 | 2.34E-08 | 1.66E-08 | 1.90E-07 |



|     |           |          |          |          |
|-----|-----------|----------|----------|----------|
| 48h | 3.63E-06  | 6.55E-08 | 1.23E-07 | 5.38E-07 |
| 72h | 7.43E-07  | 2.27E-08 | 9.26E-08 | 1.26E-06 |
|     | cgd4_940  |          |          |          |
| 2h  | 5.18E-08  | 5.41E-09 | 3.19E-08 | 2.61E-08 |
| 6h  | 4.26E-08  | 2.78E-08 | 9.30E-09 | 3.23E-07 |
| 12h | 4.82E-08  | 2.50E-08 | 1.04E-07 | 2.12E-07 |
| 24h | 2.88E-08  | 5.57E-09 | 4.46E-08 | 1.01E-07 |
| 36h | 1.52E-08  | 4.22E-09 | 1.98E-08 | 6.68E-08 |
| 48h | 1.10E-07  | 1.87E-08 | 9.08E-09 | 2.64E-07 |
| 72h | 1.98E-08  | 1.13E-09 | 6.50E-09 | 1.22E-07 |
|     | cgd4_950  |          |          |          |
| 2h  | 0.00E+00  | 0.00E+00 | 0.00E+00 | 0.00E+00 |
| 6h  | 2.22E-10  | 3.46E-09 | 1.12E-09 | 1.06E-08 |
| 12h | 0.00E+00  | 0.00E+00 | 9.95E-10 | 0.00E+00 |
| 24h | 4.84E-10  | 2.48E-10 | 3.45E-09 | 1.33E-09 |
| 36h | 6.49E-10  | 2.32E-10 | 1.25E-09 | 1.27E-09 |
| 48h | 1.01E-08  | 6.90E-10 | 1.09E-09 | 7.47E-09 |
| 72h | 2.82E-09  | 2.00E-10 | 1.47E-09 | 2.96E-09 |
|     | cgd4_960  |          |          |          |
| 2h  | 0.00E+00  | 0.00E+00 | 0.00E+00 | 0.00E+00 |
| 6h  | 1.32E-09  | 2.66E-10 | 2.07E-09 | 0.00E+00 |
| 12h | 0.00E+00  | 0.00E+00 | 1.51E-09 | 0.00E+00 |
| 24h | 1.28E-09  | 5.22E-11 | 2.36E-10 | 1.48E-10 |
| 36h | 7.06E-11  | 5.03E-11 | 2.22E-10 | 1.92E-09 |
| 48h | 5.08E-09  | 7.71E-10 | 7.07E-10 | 1.16E-09 |
| 72h | 4.73E-09  | 8.71E-10 | 7.37E-10 | 3.44E-09 |
|     | cgd4_980  |          |          |          |
| 2h  | 0.00E+00  | 0.00E+00 | 0.00E+00 | 0.00E+00 |
| 6h  | 0.00E+00  | 6.41E-11 | 1.10E-09 | 7.35E-10 |
| 12h | 1.85E-09  | 1.59E-09 | 3.47E-09 | 1.33E-09 |
| 24h | 5.47E-10  | 3.05E-10 | 9.01E-10 | 1.08E-09 |
| 36h | 6.75E-09  | 4.66E-10 | 2.72E-09 | 2.41E-09 |
| 48h | 3.80E-07  | 4.41E-08 | 5.93E-08 | 7.45E-08 |
| 72h | 6.91E-08  | 1.04E-08 | 1.20E-08 | 5.56E-08 |
|     | cgd4_990  |          |          |          |
| 2h  | 0.00E+00  | 0.00E+00 | 0.00E+00 | 0.00E+00 |
| 6h  | 0.00E+00  | 0.00E+00 | 0.00E+00 | 0.00E+00 |
| 12h | 7.52E-05  | 1.09E-04 | 2.61E-05 | 4.22E-05 |
| 24h | 3.69E-06  | 5.84E-07 | 1.25E-06 | 5.25E-06 |
| 36h | 2.14E-07  | 3.98E-06 | 7.80E-08 | 1.74E-05 |
| 48h | 3.55E-05  | 1.14E-05 | 6.79E-06 | 2.25E-05 |
| 72h | 8.44E-06  | 3.33E-07 | 6.67E-08 | 5.03E-05 |
|     | cgd4_1050 |          |          |          |
| 2h  | 0.00E+00  | 0.00E+00 | 0.00E+00 | 0.00E+00 |
| 6h  | 0.00E+00  | 0.00E+00 | 0.00E+00 | 0.00E+00 |
| 12h | 0.00E+00  | 2.56E-11 | 0.00E+00 | 1.98E-09 |
| 24h | 0.00E+00  | 0.00E+00 | 1.78E-10 | 0.00E+00 |
| 36h | 5.14E-11  | 5.95E-11 | 2.50E-10 | 1.22E-11 |
| 48h | 5.13E-10  | 1.39E-10 | 7.77E-11 | 4.88E-10 |
| 72h | 7.19E-09  | 3.66E-09 | 2.76E-09 | 5.69E-09 |
|     | cgd4_1100 |          |          |          |
| 2h  | 1.09E-05  | 2.77E-06 | 1.09E-07 | 3.15E-05 |
| 6h  | 0.00E+00  | 0.00E+00 | 0.00E+00 | 4.92E-06 |

|     |           |          |          |          |
|-----|-----------|----------|----------|----------|
| 12h | 0.00E+00  | 4.83E-07 | 5.54E-08 | 0.00E+00 |
| 24h | 4.64E-06  | 4.83E-08 | 2.05E-07 | 2.03E-06 |
| 36h | 2.05E-05  | 7.57E-08 | 0.00E+00 | 6.79E-07 |
| 48h | 7.15E-05  | 1.07E-04 | 2.23E-05 | 5.07E-04 |
| 72h | 5.33E-04  | 7.29E-05 | 1.47E-05 | 5.64E-04 |
|     | cgd4_1110 |          |          |          |
| 2h  | 0.00E+00  | 0.00E+00 | 0.00E+00 | 0.00E+00 |
| 6h  | 0.00E+00  | 0.00E+00 | 0.00E+00 | 0.00E+00 |
| 12h | 0.00E+00  | 0.00E+00 | 0.00E+00 | 0.00E+00 |
| 24h | 0.00E+00  | 0.00E+00 | 1.77E-09 | 0.00E+00 |
| 36h | 8.76E-10  | 1.15E-10 | 2.77E-10 | 1.06E-10 |
| 48h | 3.73E-06  | 3.49E-07 | 2.10E-07 | 1.51E-07 |
| 72h | 7.27E-07  | 5.61E-08 | 2.29E-07 | 1.16E-06 |
|     | cgd4_1130 |          |          |          |
| 2h  | 2.19E-09  | 0.00E+00 | 0.00E+00 | 0.00E+00 |
| 6h  | 5.08E-10  | 2.50E-09 | 3.35E-09 | 2.93E-09 |
| 12h | 0.00E+00  | 9.75E-10 | 3.95E-09 | 1.32E-09 |
| 24h | 7.64E-09  | 6.30E-10 | 5.23E-09 | 8.25E-09 |
| 36h | 3.97E-08  | 4.44E-09 | 1.03E-08 | 3.41E-08 |
| 48h | 6.13E-08  | 8.76E-09 | 3.75E-09 | 1.20E-08 |
| 72h | 1.79E-07  | 9.27E-08 | 1.20E-08 | 3.16E-07 |
|     | cgd4_1140 |          |          |          |
| 2h  | 0.00E+00  | 3.56E-10 | 0.00E+00 | 0.00E+00 |
| 6h  | 3.39E-09  | 4.17E-09 | 0.00E+00 | 4.73E-09 |
| 12h | 0.00E+00  | 1.47E-09 | 6.39E-10 | 9.20E-10 |
| 24h | 5.53E-09  | 1.57E-09 | 6.82E-09 | 7.54E-09 |
| 36h | 1.04E-09  | 3.83E-09 | 1.92E-09 | 3.50E-08 |
| 48h | 3.37E-08  | 1.29E-08 | 4.37E-08 | 2.00E-07 |
| 72h | 5.82E-08  | 2.57E-08 | 8.09E-08 | 1.73E-07 |
|     | cgd4_1150 |          |          |          |
| 2h  | 4.50E-07  | 5.03E-06 | 1.69E-04 | 7.78E-06 |
| 6h  | 6.54E-06  | 3.52E-05 | 7.72E-05 | 2.60E-05 |
| 12h | 3.44E-07  | 7.11E-06 | 3.99E-05 | 4.56E-07 |
| 24h | 3.10E-06  | 2.44E-06 | 1.31E-04 | 1.44E-06 |
| 36h | 4.11E-06  | 4.09E-06 | 1.77E-05 | 1.56E-06 |
| 48h | 1.02E-04  | 2.28E-05 | 6.85E-05 | 2.63E-05 |
| 72h | 1.70E-04  | 9.83E-05 | 3.46E-04 | 2.56E-05 |
|     | cgd4_1160 |          |          |          |
| 2h  | 1.49E-08  | 4.84E-08 | 4.13E-07 | 1.95E-07 |
| 6h  | 2.17E-08  | 2.76E-08 | 3.53E-08 | 1.43E-07 |
| 12h | 5.06E-08  | 1.80E-08 | 2.58E-08 | 3.15E-07 |
| 24h | 1.32E-08  | 5.16E-09 | 4.29E-08 | 4.42E-08 |
| 36h | 2.09E-08  | 1.19E-08 | 3.81E-08 | 6.03E-08 |
| 48h | 2.51E-07  | 2.30E-08 | 1.94E-07 | 2.22E-07 |
| 72h | 1.52E-07  | 6.04E-08 | 2.33E-07 | 2.66E-07 |
|     | cgd4_1170 |          |          |          |
| 2h  | 0.00E+00  | 0.00E+00 | 0.00E+00 | 0.00E+00 |
| 6h  | 2.40E-07  | 1.09E-06 | 2.73E-07 | 1.22E-06 |
| 12h | 0.00E+00  | 8.50E-09 | 4.06E-07 | 8.47E-09 |
| 24h | 6.73E-07  | 1.36E-07 | 1.75E-06 | 5.55E-08 |
| 36h | 1.70E-06  | 6.32E-07 | 1.29E-07 | 4.21E-07 |
| 48h | 2.67E-05  | 4.87E-06 | 2.02E-05 | 1.42E-06 |
| 72h | 7.79E-06  | 2.98E-06 | 2.01E-05 | 8.35E-07 |

|     |           |          |          |          |
|-----|-----------|----------|----------|----------|
|     | cgd4_1210 |          |          |          |
| 2h  | 2.06E-10  | 6.06E-09 | 1.01E-07 | 7.08E-08 |
| 6h  | 2.08E-09  | 4.13E-08 | 1.07E-08 | 1.28E-07 |
| 12h | 0.00E+00  | 1.10E-08 | 7.03E-09 | 2.10E-08 |
| 24h | 2.92E-09  | 9.18E-09 | 1.91E-07 | 2.56E-08 |
| 36h | 4.94E-09  | 3.83E-09 | 5.69E-09 | 2.93E-08 |
| 48h | 1.69E-07  | 7.70E-08 | 4.72E-08 | 1.74E-07 |
| 72h | 6.03E-08  | 2.33E-08 | 7.98E-08 | 7.24E-08 |
|     | cgd4_1220 |          |          |          |
| 2h  | 3.25E-05  | 2.53E-05 | 4.07E-05 | 4.43E-05 |
| 6h  | 6.29E-06  | 4.22E-06 | 3.96E-07 | 5.01E-07 |
| 12h | 6.45E-05  | 2.68E-05 | 3.02E-05 | 8.04E-06 |
| 24h | 5.96E-06  | 1.44E-06 | 2.99E-06 | 1.84E-06 |
| 36h | 6.63E-06  | 2.40E-06 | 1.87E-06 | 3.77E-07 |
| 48h | 1.73E-05  | 3.46E-06 | 8.08E-06 | 6.66E-06 |
| 72h | 5.81E-06  | 5.94E-06 | 3.53E-06 | 3.54E-07 |
|     | cgd4_1240 |          |          |          |
| 2h  | 2.23E-08  | 3.16E-08 | 1.78E-06 | 1.93E-07 |
| 6h  | 0.00E+00  | 4.24E-09 | 1.42E-07 | 3.87E-08 |
| 12h | 2.48E-08  | 3.00E-08 | 1.79E-07 | 2.68E-09 |
| 24h | 7.13E-09  | 4.12E-09 | 3.28E-07 | 1.28E-08 |
| 36h | 2.38E-07  | 1.04E-07 | 3.06E-07 | 5.65E-08 |
| 48h | 4.15E-06  | 3.32E-07 | 1.68E-06 | 7.24E-07 |
| 72h | 8.86E-07  | 2.99E-07 | 1.53E-06 | 2.55E-07 |
|     | cgd4_1270 |          |          |          |
| 2h  | 6.27E-09  | 7.51E-10 | 1.96E-07 | 9.72E-08 |
| 6h  | 0.00E+00  | 4.03E-09 | 0.00E+00 | 4.05E-08 |
| 12h | 1.03E-08  | 2.47E-09 | 5.54E-09 | 1.02E-08 |
| 24h | 5.09E-09  | 6.44E-09 | 6.30E-09 | 1.18E-08 |
| 36h | 3.33E-09  | 3.37E-10 | 2.29E-09 | 5.18E-09 |
| 48h | 1.14E-07  | 1.03E-08 | 1.32E-08 | 4.00E-08 |
| 72h | 2.19E-08  | 2.12E-09 | 1.96E-11 | 6.05E-09 |
|     | cgd4_1280 |          |          |          |
| 2h  | 1.58E-08  | 1.38E-08 | 6.27E-08 | 2.81E-08 |
| 6h  | 0.00E+00  | 9.89E-10 | 4.70E-09 | 1.44E-09 |
| 12h | 0.00E+00  | 2.28E-09 | 2.25E-09 | 4.48E-09 |
| 24h | 9.51E-10  | 1.07E-09 | 1.59E-10 | 2.28E-09 |
| 36h | 3.27E-10  | 9.49E-10 | 7.75E-10 | 9.30E-10 |
| 48h | 1.98E-08  | 1.17E-08 | 1.68E-08 | 1.35E-08 |
| 72h | 8.96E-09  | 9.25E-09 | 1.75E-08 | 4.55E-09 |
|     | cgd4_1300 |          |          |          |
| 2h  | 0.00E+00  | 4.80E-11 | 0.00E+00 | 0.00E+00 |
| 6h  | 0.00E+00  | 0.00E+00 | 0.00E+00 | 0.00E+00 |
| 12h | 0.00E+00  | 6.97E-11 | 2.61E-10 | 0.00E+00 |
| 24h | 1.75E-10  | 1.32E-10 | 1.19E-09 | 0.00E+00 |
| 36h | 4.30E-11  | 2.77E-11 | 2.60E-10 | 3.90E-10 |
| 48h | 4.28E-07  | 5.90E-08 | 2.38E-07 | 2.79E-07 |
| 72h | 2.68E-09  | 2.13E-09 | 4.22E-09 | 8.36E-09 |
|     | cgd4_1310 |          |          |          |
| 2h  | 0.00E+00  | 0.00E+00 | 0.00E+00 | 0.00E+00 |
| 6h  | 0.00E+00  | 0.00E+00 | 0.00E+00 | 0.00E+00 |
| 12h | 0.00E+00  | 0.00E+00 | 0.00E+00 | 0.00E+00 |
| 24h | 1.17E-10  | 0.00E+00 | 0.00E+00 | 1.92E-10 |

|     |           |          |          |          |
|-----|-----------|----------|----------|----------|
| 36h | 0.00E+00  | 7.21E-11 | 0.00E+00 | 0.00E+00 |
| 48h | 7.88E-09  | 3.19E-10 | 1.60E-09 | 1.37E-09 |
| 72h | 7.87E-08  | 2.44E-08 | 2.22E-07 | 7.60E-08 |
|     | cgd4_180  |          |          |          |
| 2h  | 0.00E+00  | 0.00E+00 | 0.00E+00 | 0.00E+00 |
| 6h  | 3.15E-05  | 1.98E-05 | 3.76E-05 | 2.75E-05 |
| 12h | 1.06E-07  | 7.56E-06 | 2.43E-05 | 2.19E-06 |
| 24h | 1.75E-06  | 1.27E-05 | 3.49E-06 | 5.92E-05 |
| 36h | 5.88E-06  | 8.99E-06 | 9.91E-06 | 6.16E-05 |
| 48h | 5.33E-06  | 1.41E-05 | 2.19E-06 | 7.05E-05 |
| 72h | 2.30E-05  | 5.51E-05 | 7.07E-05 | 1.69E-05 |
|     | cgd2_1040 |          |          |          |
| 2h  | 0.00E+00  | 5.11E-09 | 2.45E-07 | 1.65E-07 |
| 6h  | 2.80E-08  | 1.03E-07 | 1.45E-07 | 3.25E-07 |
| 12h | 3.55E-08  | 8.29E-09 | 7.80E-08 | 1.04E-07 |
| 24h | 1.92E-08  | 1.07E-08 | 1.39E-07 | 4.82E-08 |
| 36h | 1.71E-08  | 4.64E-09 | 6.67E-09 | 4.54E-08 |
| 48h | 7.88E-08  | 3.11E-08 | 2.26E-08 | 5.53E-08 |
| 72h | 9.74E-09  | 3.23E-09 | 6.14E-09 | 1.74E-08 |
|     | cgd2_1080 |          |          |          |
| 2h  | 1.25E-08  | 1.44E-08 | 1.81E-08 | 1.20E-08 |
| 6h  | 1.02E-08  | 3.48E-08 | 2.57E-09 | 5.49E-08 |
| 12h | 7.54E-10  | 7.29E-09 | 1.87E-08 | 2.38E-08 |
| 24h | 7.06E-09  | 1.22E-08 | 2.96E-08 | 1.29E-08 |
| 36h | 4.81E-09  | 4.16E-09 | 3.91E-09 | 2.65E-08 |
| 48h | 5.44E-08  | 9.79E-09 | 1.79E-08 | 1.24E-07 |
| 72h | 2.42E-08  | 3.15E-09 | 7.30E-09 | 7.58E-08 |
|     | cgd2_1090 |          |          |          |
| 2h  | 0.00E+00  | 0.00E+00 | 0.00E+00 | 0.00E+00 |
| 6h  | 4.91E-10  | 2.53E-09 | 1.08E-08 | 3.27E-08 |
| 12h | 7.56E-10  | 1.95E-09 | 3.75E-09 | 3.46E-09 |
| 24h | 7.14E-10  | 4.24E-10 | 1.09E-08 | 3.22E-09 |
| 36h | 5.96E-09  | 5.93E-10 | 7.48E-09 | 6.88E-09 |
| 48h | 9.32E-08  | 1.06E-08 | 9.64E-09 | 6.82E-08 |
| 72h | 9.55E-09  | 1.70E-09 | 6.54E-09 | 3.66E-08 |
|     | cgd2_1120 |          |          |          |
| 2h  | 3.03E-08  | 2.99E-08 | 6.25E-08 | 2.98E-07 |
| 6h  | 2.35E-08  | 1.84E-08 | 1.16E-08 | 1.01E-07 |
| 12h | 5.80E-08  | 2.42E-08 | 6.43E-08 | 1.62E-07 |
| 24h | 4.81E-08  | 8.65E-09 | 3.01E-08 | 1.07E-07 |
| 36h | 2.22E-08  | 9.78E-09 | 8.46E-09 | 6.26E-08 |
| 48h | 9.05E-08  | 3.26E-08 | 7.85E-09 | 3.19E-07 |
| 72h | 2.82E-08  | 7.28E-09 | 3.59E-09 | 2.75E-08 |
|     | cgd2_1130 |          |          |          |
| 2h  | 1.62E-09  | 0.00E+00 | 4.43E-09 | 9.82E-09 |
| 6h  | 6.36E-09  | 1.32E-08 | 1.74E-08 | 3.88E-08 |
| 12h | 1.62E-08  | 2.24E-09 | 1.85E-09 | 1.11E-08 |
| 24h | 8.81E-09  | 4.43E-09 | 7.28E-09 | 4.11E-08 |
| 36h | 1.31E-08  | 1.38E-08 | 3.23E-09 | 1.46E-08 |
| 48h | 6.81E-08  | 1.62E-08 | 5.79E-09 | 3.23E-07 |
| 72h | 2.05E-08  | 9.55E-10 | 2.44E-10 | 6.18E-08 |
|     | cgd2_1230 |          |          |          |
| 2h  | 0.00E+00  | 7.57E-09 | 1.11E-08 | 4.43E-09 |

|           |          |          |          |          |
|-----------|----------|----------|----------|----------|
| 6h        | 0.00E+00 | 3.52E-10 | 2.47E-09 | 0.00E+00 |
| 12h       | 0.00E+00 | 5.34E-10 | 0.00E+00 | 0.00E+00 |
| 24h       | 0.00E+00 | 2.97E-11 | 9.92E-10 | 2.03E-09 |
| 36h       | 7.26E-10 | 7.40E-10 | 1.52E-10 | 1.60E-09 |
| 48h       | 4.29E-07 | 8.08E-08 | 6.63E-08 | 1.41E-06 |
| 72h       | 1.20E-08 | 5.83E-08 | 7.80E-09 | 5.09E-07 |
| cgd2_1240 |          |          |          |          |
| 2h        | 0.00E+00 | 0.00E+00 | 0.00E+00 | 0.00E+00 |
| 6h        | 0.00E+00 | 1.25E-06 | 4.59E-07 | 1.25E-05 |
| 12h       | 3.46E-08 | 6.67E-06 | 1.38E-08 | 7.36E-06 |
| 24h       | 9.37E-07 | 4.68E-06 | 4.89E-07 | 3.58E-06 |
| 36h       | 4.62E-06 | 2.14E-05 | 4.98E-07 | 1.01E-05 |
| 48h       | 4.12E-05 | 2.19E-05 | 1.40E-05 | 1.81E-04 |
| 72h       | 1.75E-05 | 2.64E-05 | 3.80E-07 | 1.19E-04 |
| cgd2_1260 |          |          |          |          |
| 2h        | 0.00E+00 | 0.00E+00 | 0.00E+00 | 0.00E+00 |
| 6h        | 1.65E-08 | 1.40E-07 | 3.87E-08 | 1.05E-06 |
| 12h       | 3.02E-09 | 2.21E-10 | 0.00E+00 | 0.00E+00 |
| 24h       | 2.78E-08 | 1.69E-08 | 3.13E-08 | 1.05E-07 |
| 36h       | 4.12E-08 | 1.46E-08 | 4.75E-09 | 4.54E-07 |
| 48h       | 1.50E-07 | 2.92E-07 | 6.72E-09 | 2.87E-06 |
| 72h       | 1.17E-08 | 5.45E-09 | 3.34E-09 | 3.82E-07 |
| cgd2_1460 |          |          |          |          |
| 2h        | 0.00E+00 | 1.22E-07 | 3.86E-08 | 1.19E-07 |
| 6h        | 4.06E-08 | 8.44E-08 | 6.33E-08 | 7.01E-07 |
| 12h       | 1.74E-09 | 1.15E-08 | 8.75E-09 | 1.61E-07 |
| 24h       | 2.20E-08 | 1.05E-08 | 9.71E-08 | 7.02E-08 |
| 36h       | 3.15E-08 | 1.67E-08 | 1.17E-08 | 1.90E-07 |
| 48h       | 2.30E-07 | 3.40E-08 | 3.63E-08 | 3.29E-07 |
| 72h       | 2.09E-08 | 2.05E-08 | 8.84E-09 | 3.88E-07 |
| cgd2_1570 |          |          |          |          |
| 2h        | 7.73E-08 | 2.90E-09 | 8.92E-09 | 8.79E-09 |
| 6h        | 2.13E-08 | 1.99E-08 | 9.84E-08 | 8.48E-08 |
| 12h       | 1.51E-09 | 5.45E-09 | 4.28E-09 | 5.51E-09 |
| 24h       | 2.34E-08 | 9.39E-09 | 3.14E-08 | 5.71E-08 |
| 36h       | 2.76E-08 | 3.83E-09 | 6.43E-09 | 4.53E-08 |
| 48h       | 5.04E-08 | 3.47E-08 | 4.11E-08 | 4.67E-08 |
| 72h       | 2.37E-08 | 5.11E-09 | 1.21E-08 | 3.29E-08 |
| cgd2_1580 |          |          |          |          |
| 2h        | 1.72E-07 | 3.33E-08 | 1.06E-06 | 1.31E-06 |
| 6h        | 1.19E-06 | 4.01E-08 | 8.92E-08 | 2.02E-07 |
| 12h       | 1.09E-07 | 1.04E-07 | 5.14E-08 | 1.59E-07 |
| 24h       | 3.35E-07 | 6.46E-08 | 2.05E-07 | 1.83E-07 |
| 36h       | 2.32E-07 | 4.50E-08 | 1.85E-08 | 1.25E-07 |
| 48h       | 2.60E-07 | 1.22E-07 | 1.11E-07 | 1.84E-07 |
| 72h       | 2.78E-07 | 9.71E-09 | 7.80E-08 | 3.03E-07 |
| cgd2_1720 |          |          |          |          |
| 2h        | 2.04E-08 | 2.82E-09 | 3.60E-09 | 4.47E-08 |
| 6h        | 1.34E-08 | 3.89E-09 | 1.56E-08 | 2.56E-08 |
| 12h       | 6.44E-09 | 5.37E-10 | 1.02E-09 | 8.42E-09 |
| 24h       | 3.46E-09 | 1.12E-09 | 3.36E-09 | 1.41E-08 |
| 36h       | 2.21E-08 | 2.31E-09 | 1.05E-08 | 4.92E-08 |
| 48h       | 2.14E-07 | 2.22E-08 | 1.74E-08 | 1.15E-07 |

|     |           |          |          |          |
|-----|-----------|----------|----------|----------|
| 72h | 4.35E-08  | 3.24E-09 | 1.28E-08 | 1.74E-08 |
|     | cgd2_1770 |          |          |          |
| 2h  | 0.00E+00  | 1.08E-09 | 0.00E+00 | 4.16E-09 |
| 6h  | 2.77E-08  | 2.07E-08 | 1.61E-07 | 2.40E-07 |
| 12h | 9.97E-09  | 9.04E-10 | 4.06E-09 | 4.48E-09 |
| 24h | 4.24E-08  | 3.24E-09 | 1.71E-08 | 1.47E-07 |
| 36h | 4.33E-08  | 8.44E-09 | 5.34E-08 | 7.19E-08 |
| 48h | 8.00E-08  | 1.63E-08 | 1.46E-08 | 6.40E-08 |
| 72h | 2.22E-08  | 3.14E-09 | 7.03E-09 | 2.39E-08 |
|     | cgd2_1930 |          |          |          |
| 2h  | 7.78E-09  | 0.00E+00 | 2.36E-07 | 0.00E+00 |
| 6h  | 3.41E-07  | 3.45E-07 | 7.78E-07 | 3.18E-03 |
| 12h | 7.34E-09  | 5.12E-08 | 4.72E-08 | 1.86E-04 |
| 24h | 4.36E-08  | 1.65E-07 | 6.25E-07 | 3.11E-03 |
| 36h | 2.66E-08  | 4.75E-07 | 8.02E-07 | 1.85E-03 |
| 48h | 6.22E-08  | 1.99E-07 | 5.08E-07 | 2.87E-04 |
| 72h | 8.76E-09  | 5.94E-07 | 3.36E-07 | 4.60E-04 |
|     | cgd2_2010 |          |          |          |
| 2h  | 0.00E+00  | 6.43E-09 | 4.31E-08 | 1.61E-08 |
| 6h  | 2.20E-08  | 3.82E-09 | 8.45E-09 | 2.53E-08 |
| 12h | 1.73E-08  | 8.67E-09 | 1.33E-08 | 1.29E-08 |
| 24h | 2.92E-08  | 4.17E-09 | 1.76E-08 | 6.27E-08 |
| 36h | 4.89E-08  | 1.51E-08 | 3.59E-08 | 9.52E-08 |
| 48h | 1.27E-07  | 4.14E-08 | 2.51E-08 | 9.79E-08 |
| 72h | 1.78E-08  | 1.18E-09 | 7.25E-09 | 1.63E-08 |
|     | cgd2_2050 |          |          |          |
| 2h  | 1.02E-07  | 1.63E-07 | 3.39E-07 | 3.27E-08 |
| 6h  | 8.01E-06  | 5.53E-06 | 2.88E-05 | 2.34E-05 |
| 12h | 4.01E-07  | 1.60E-07 | 4.39E-07 | 8.53E-07 |
| 24h | 5.82E-06  | 2.17E-06 | 7.76E-06 | 1.60E-05 |
| 36h | 2.46E-05  | 9.62E-07 | 1.38E-05 | 1.36E-05 |
| 48h | 2.39E-05  | 2.45E-06 | 1.46E-05 | 1.52E-05 |
| 72h | 1.14E-06  | 1.82E-07 | 7.28E-07 | 2.10E-06 |
|     | cgd2_2070 |          |          |          |
| 2h  | 1.23E-08  | 4.70E-09 | 6.39E-07 | 1.10E-07 |
| 6h  | 1.35E-08  | 7.15E-09 | 1.32E-08 | 2.28E-08 |
| 12h | 3.30E-09  | 1.78E-09 | 1.94E-08 | 5.33E-08 |
| 24h | 7.67E-09  | 1.23E-09 | 1.48E-08 | 4.10E-08 |
| 36h | 2.41E-08  | 1.91E-09 | 3.95E-09 | 6.34E-08 |
| 48h | 4.88E-08  | 7.29E-09 | 8.17E-09 | 3.42E-08 |
| 72h | 1.21E-08  | 1.19E-09 | 4.54E-08 | 4.68E-08 |
|     | cgd2_2110 |          |          |          |
| 2h  | 0.00E+00  | 0.00E+00 | 0.00E+00 | 2.96E-03 |
| 6h  | 0.00E+00  | 0.00E+00 | 0.00E+00 | 0.00E+00 |
| 12h | 0.00E+00  | 0.00E+00 | 4.36E-08 | 2.50E-07 |
| 24h | 0.00E+00  | 1.48E-08 | 1.69E-09 | 0.00E+00 |
| 36h | 3.42E-10  | 1.44E-09 | 0.00E+00 | 7.51E-09 |
| 48h | 3.81E-07  | 2.33E-07 | 2.68E-07 | 7.15E-07 |
| 72h | 2.80E-05  | 1.71E-05 | 1.13E-05 | 4.15E-05 |
|     | cgd2_2240 |          |          |          |
| 2h  | 5.81E-09  | 2.73E-08 | 1.05E-07 | 3.63E-07 |
| 6h  | 3.61E-09  | 7.91E-09 | 7.05E-09 | 3.83E-08 |
| 12h | 1.16E-08  | 3.89E-08 | 4.56E-08 | 8.97E-08 |

|     |           |          |          |          |
|-----|-----------|----------|----------|----------|
| 24h | 5.57E-08  | 3.71E-09 | 3.13E-08 | 6.69E-08 |
| 36h | 2.36E-08  | 6.15E-09 | 1.11E-08 | 6.43E-08 |
| 48h | 2.91E-07  | 5.64E-08 | 1.02E-07 | 1.38E-07 |
| 72h | 2.39E-08  | 1.53E-08 | 8.70E-08 | 6.45E-08 |
|     | cgd2_2550 |          |          |          |
| 2h  | 0.00E+00  | 0.00E+00 | 7.18E-07 | 0.00E+00 |
| 6h  | 1.24E-07  | 4.11E-08 | 2.47E-07 | 5.56E-07 |
| 12h | 1.36E-05  | 1.28E-07 | 1.73E-06 | 4.20E-06 |
| 24h | 6.01E-08  | 7.74E-08 | 1.10E-06 | 5.09E-06 |
| 36h | 1.12E-06  | 1.10E-06 | 2.48E-06 | 1.13E-04 |
| 48h | 2.12E-05  | 4.33E-06 | 2.02E-05 | 3.14E-05 |
| 72h | 7.03E-05  | 4.36E-07 | 6.39E-06 | 1.96E-05 |
|     | cgd2_2910 |          |          |          |
| 2h  | 4.03E-08  | 4.55E-07 | 1.20E-06 | 6.28E-06 |
| 6h  | 1.37E-08  | 4.00E-08 | 2.35E-08 | 9.44E-08 |
| 12h | 1.57E-07  | 2.61E-07 | 1.02E-06 | 1.81E-06 |
| 24h | 1.08E-08  | 2.47E-08 | 2.41E-07 | 2.54E-07 |
| 36h | 6.11E-08  | 6.23E-08 | 9.28E-08 | 7.69E-07 |
| 48h | 4.27E-07  | 1.28E-07 | 1.92E-07 | 5.65E-07 |
| 72h | 2.93E-07  | 4.17E-08 | 1.96E-07 | 5.93E-07 |
|     | cgd2_2920 |          |          |          |
| 2h  | 1.37E-09  | 5.32E-09 | 1.79E-08 | 2.22E-09 |
| 6h  | 0.00E+00  | 0.00E+00 | 0.00E+00 | 2.20E-10 |
| 12h | 4.18E-09  | 3.80E-09 | 8.21E-09 | 1.98E-08 |
| 24h | 9.50E-10  | 5.29E-11 | 3.86E-09 | 4.84E-09 |
| 36h | 1.75E-09  | 8.86E-10 | 3.55E-09 | 2.31E-08 |
| 48h | 1.22E-07  | 6.42E-08 | 1.35E-07 | 1.81E-07 |
| 72h | 8.93E-07  | 2.26E-07 | 1.02E-06 | 1.76E-06 |
|     | cgd2_3100 |          |          |          |
| 2h  | 8.46E-09  | 7.80E-09 | 4.32E-08 | 5.43E-08 |
| 6h  | 2.25E-08  | 1.30E-08 | 8.49E-08 | 1.13E-07 |
| 12h | 6.18E-09  | 3.29E-09 | 6.48E-09 | 1.66E-08 |
| 24h | 7.46E-09  | 7.41E-09 | 2.95E-08 | 4.66E-08 |
| 36h | 2.72E-08  | 6.13E-09 | 1.81E-08 | 1.13E-07 |
| 48h | 6.91E-08  | 2.70E-08 | 5.51E-08 | 1.58E-07 |
| 72h | 5.69E-07  | 1.56E-07 | 7.56E-07 | 7.75E-07 |
|     | cgd2_3110 |          |          |          |
| 2h  | 3.64E-06  | 2.14E-04 | 7.85E-04 | 1.49E-03 |
| 6h  | 2.40E-06  | 4.34E-05 | 4.41E-04 | 6.75E-04 |
| 12h | 3.00E-06  | 2.94E-05 | 1.17E-03 | 8.16E-04 |
| 24h | 2.92E-06  | 6.62E-06 | 3.04E-04 | 3.54E-04 |
| 36h | 1.21E-05  | 1.19E-05 | 2.18E-05 | 4.33E-04 |
| 48h | 4.56E-04  | 8.52E-05 | 6.19E-04 | 4.58E-04 |
| 72h | 8.48E-06  | 1.59E-06 | 2.03E-05 | 4.12E-05 |
|     | cgd2_3270 |          |          |          |
| 2h  | 2.16E-06  | 8.03E-09 | 4.94E-08 | 1.98E-07 |
| 6h  | 1.72E-04  | 1.35E-07 | 1.40E-07 | 3.45E-07 |
| 12h | 0.00E+00  | 2.27E-04 | 1.51E-03 | 1.43E-03 |
| 24h | 0.00E+00  | 1.54E-05 | 4.30E-07 | 4.20E-07 |
| 36h | 2.50E-07  | 9.76E-08 | 3.00E-07 | 2.31E-06 |
| 48h | 3.94E-06  | 9.52E-07 | 1.63E-06 | 2.52E-06 |
| 72h | 1.26E-07  | 2.60E-08 | 3.48E-07 | 3.34E-07 |
|     | cgd2_3290 |          |          |          |

|     |           |          |          |          |
|-----|-----------|----------|----------|----------|
| 2h  | 2.67E-06  | 3.65E-05 | 1.75E-04 | 3.41E-04 |
| 6h  | 3.42E-06  | 2.77E-05 | 3.79E-05 | 2.02E-04 |
| 12h | 6.12E-06  | 2.15E-05 | 8.46E-05 | 1.96E-04 |
| 24h | 6.59E-06  | 8.15E-06 | 1.39E-04 | 2.89E-04 |
| 36h | 1.11E-05  | 6.10E-06 | 4.10E-06 | 4.12E-05 |
| 48h | 5.91E-05  | 3.30E-05 | 4.15E-05 | 6.96E-05 |
| 72h | 6.48E-04  | 3.90E-04 | 7.40E-05 | 2.12E-05 |
|     | cgd2_3310 |          |          |          |
| 2h  | 0.00E+00  | 0.00E+00 | 0.00E+00 | 0.00E+00 |
| 6h  | 7.41E-05  | 0.00E+00 | 9.06E-08 | 0.00E+00 |
| 12h | 0.00E+00  | 2.86E-05 | 0.00E+00 | 3.22E-04 |
| 24h | 6.20E-07  | 1.48E-11 | 1.14E-04 | 1.61E-08 |
| 36h | 1.81E-09  | 1.14E-09 | 1.07E-09 | 3.46E-09 |
| 48h | 4.84E-08  | 2.73E-05 | 7.07E-07 | 3.20E-07 |
| 72h | 1.02E-06  | 4.19E-06 | 5.97E-08 | 5.73E-08 |
|     | cgd2_3320 |          |          |          |
| 2h  | 0.00E+00  | 0.00E+00 | 2.19E-08 | 8.15E-08 |
| 6h  | 0.00E+00  | 1.36E-06 | 2.73E-06 | 2.77E-06 |
| 12h | 0.00E+00  | 2.18E-09 | 9.55E-08 | 6.14E-08 |
| 24h | 9.47E-09  | 4.00E-09 | 1.35E-06 | 1.66E-06 |
| 36h | 7.37E-09  | 4.50E-09 | 1.99E-08 | 1.89E-06 |
| 48h | 2.89E-06  | 3.07E-07 | 4.09E-06 | 1.71E-06 |
| 72h | 2.71E-07  | 6.09E-08 | 2.23E-06 | 2.17E-06 |
|     | cgd2_3350 |          |          |          |
| 2h  | 0.00E+00  | 0.00E+00 | 0.00E+00 | 0.00E+00 |
| 6h  | 0.00E+00  | 0.00E+00 | 2.66E-08 | 0.00E+00 |
| 12h | 9.30E-08  | 1.25E-07 | 2.96E-07 | 1.65E-07 |
| 24h | 9.93E-08  | 7.97E-08 | 5.64E-07 | 2.67E-07 |
| 36h | 5.01E-07  | 4.33E-07 | 6.07E-07 | 2.66E-06 |
| 48h | 2.46E-06  | 4.09E-07 | 1.08E-06 | 2.14E-06 |
| 72h | 1.40E-07  | 3.39E-08 | 1.01E-07 | 4.55E-07 |
|     | cgd2_3380 |          |          |          |
| 2h  | 1.49E-07  | 5.11E-06 | 7.54E-05 | 3.61E-04 |
| 6h  | 5.73E-07  | 2.56E-05 | 3.89E-05 | 1.15E-04 |
| 12h | 5.01E-08  | 2.88E-06 | 6.01E-06 | 1.84E-05 |
| 24h | 6.55E-07  | 2.76E-06 | 5.87E-05 | 3.56E-05 |
| 36h | 1.06E-06  | 3.60E-06 | 5.01E-06 | 4.68E-05 |
| 48h | 4.62E-05  | 6.99E-06 | 2.97E-05 | 2.80E-05 |
| 72h | 4.68E-06  | 9.14E-07 | 1.66E-05 | 2.02E-05 |
|     | cgd2_3420 |          |          |          |
| 2h  | 8.44E-06  | 8.48E-06 | 8.48E-06 | 2.77E-05 |
| 6h  | 8.80E-07  | 1.10E-06 | 1.91E-07 | 6.79E-07 |
| 12h | 1.98E-06  | 3.72E-06 | 2.46E-06 | 4.23E-06 |
| 24h | 5.70E-07  | 1.10E-06 | 1.69E-06 | 1.07E-06 |
| 36h | 6.66E-07  | 8.18E-07 | 5.63E-07 | 1.54E-06 |
| 48h | 1.02E-06  | 2.25E-07 | 5.20E-07 | 6.02E-07 |
| 72h | 4.91E-07  | 8.56E-08 | 7.49E-07 | 1.48E-06 |
|     | cgd2_3490 |          |          |          |
| 2h  | 0.00E+00  | 0.00E+00 | 2.30E-06 | 6.07E-07 |
| 6h  | 1.11E-06  | 1.37E-07 | 5.47E-06 | 5.41E-06 |
| 12h | 0.00E+00  | 1.44E-07 | 7.59E-07 | 5.50E-07 |
| 24h | 1.69E-08  | 1.84E-07 | 2.58E-06 | 1.06E-06 |
| 36h | 5.46E-08  | 1.71E-07 | 1.25E-07 | 8.04E-06 |



|     |           |          |          |          |
|-----|-----------|----------|----------|----------|
| 48h | 1.33E-04  | 7.80E-06 | 6.98E-05 | 6.11E-05 |
| 72h | 3.91E-05  | 2.26E-06 | 1.59E-04 | 1.35E-04 |
|     | cgd2_3700 |          |          |          |
| 2h  | 0.00E+00  | 0.00E+00 | 0.00E+00 | 7.56E-09 |
| 6h  | 1.54E-08  | 3.28E-09 | 1.01E-07 | 3.41E-08 |
| 12h | 0.00E+00  | 4.96E-10 | 1.29E-09 | 8.78E-09 |
| 24h | 1.88E-10  | 8.60E-11 | 3.58E-08 | 7.89E-09 |
| 36h | 1.22E-08  | 1.17E-08 | 1.44E-09 | 1.19E-07 |
| 48h | 5.01E-08  | 1.52E-08 | 8.96E-09 | 4.87E-08 |
| 72h | 4.80E-09  | 2.53E-09 | 1.01E-08 | 3.05E-08 |
|     | cgd2_3710 |          |          |          |
| 2h  | 0.00E+00  | 0.00E+00 | 0.00E+00 | 0.00E+00 |
| 6h  | 0.00E+00  | 0.00E+00 | 0.00E+00 | 0.00E+00 |
| 12h | 8.07E-09  | 4.90E-09 | 4.15E-09 | 4.79E-09 |
| 24h | 3.11E-10  | 8.62E-11 | 5.73E-09 | 1.49E-09 |
| 36h | 5.24E-07  | 2.48E-09 | 3.24E-09 | 2.29E-08 |
| 48h | 1.46E-08  | 1.97E-09 | 5.77E-09 | 1.70E-08 |
| 72h | 1.35E-08  | 9.00E-10 | 3.83E-08 | 8.20E-08 |
|     | cgd2_3730 |          |          |          |
| 2h  | 3.28E-04  | 1.61E-03 | 0.00E+00 | 2.14E-03 |
| 6h  | 1.21E-04  | 6.99E-04 | 3.61E-04 | 6.88E-04 |
| 12h | 1.69E-04  | 1.23E-03 | 1.05E-03 | 1.53E-03 |
| 24h | 9.99E-05  | 1.57E-04 | 4.50E-04 | 3.16E-04 |
| 36h | 3.55E-04  | 2.74E-04 | 2.51E-04 | 6.77E-04 |
| 48h | 2.72E-04  | 1.92E-04 | 7.62E-04 | 6.29E-04 |
| 72h | 5.97E-05  | 2.64E-05 | 4.14E-05 | 1.82E-04 |
|     | cgd2_3920 |          |          |          |
| 2h  | 0.00E+00  | 5.37E-08 | 2.89E-07 | 1.80E-07 |
| 6h  | 6.00E-08  | 1.18E-06 | 4.65E-05 | 2.24E-05 |
| 12h | 0.00E+00  | 4.30E-08 | 2.55E-06 | 6.72E-07 |
| 24h | 1.40E-07  | 6.15E-08 | 3.85E-05 | 1.26E-05 |
| 36h | 2.97E-08  | 2.50E-07 | 1.24E-07 | 7.09E-06 |
| 48h | 9.61E-06  | 8.70E-07 | 9.69E-06 | 4.82E-06 |
| 72h | 2.29E-07  | 3.79E-08 | 1.41E-06 | 1.69E-06 |
|     | cgd2_4020 |          |          |          |
| 2h  | 6.66E-05  | 1.95E-04 | 4.75E-04 | 3.96E-04 |
| 6h  | 1.95E-05  | 1.96E-05 | 2.70E-05 | 6.75E-05 |
| 12h | 9.80E-05  | 1.08E-04 | 2.08E-05 | 1.25E-04 |
| 24h | 4.13E-05  | 6.93E-05 | 7.98E-05 | 1.36E-04 |
| 36h | 2.61E-05  | 4.46E-05 | 2.81E-05 | 6.57E-05 |
| 48h | 1.57E-04  | 4.26E-05 | 4.39E-05 | 3.06E-04 |
| 72h | 6.00E-06  | 1.03E-05 | 2.44E-06 | 1.82E-05 |
|     | cgd2_4040 |          |          |          |
| 2h  | 1.66E-06  | 9.03E-06 | 1.85E-05 | 1.30E-05 |
| 6h  | 0.00E+00  | 1.91E-07 | 1.68E-08 | 1.52E-07 |
| 12h | 2.91E-07  | 2.07E-06 | 2.04E-05 | 1.46E-05 |
| 24h | 9.04E-08  | 6.07E-07 | 8.94E-06 | 7.25E-06 |
| 36h | 4.19E-06  | 1.67E-06 | 3.52E-06 | 3.27E-05 |
| 48h | 8.76E-06  | 4.22E-06 | 7.33E-06 | 4.16E-05 |
| 72h | 8.39E-06  | 5.27E-06 | 1.71E-05 | 4.17E-05 |
|     | cgd2_4080 |          |          |          |
| 2h  | 0.00E+00  | 1.55E-08 | 0.00E+00 | 0.00E+00 |
| 6h  | 6.23E-09  | 1.44E-08 | 1.35E-07 | 1.50E-07 |

|     |           |          |          |          |
|-----|-----------|----------|----------|----------|
| 12h | 1.52E-08  | 3.90E-10 | 2.18E-09 | 2.37E-09 |
| 24h | 6.27E-10  | 1.59E-09 | 6.37E-08 | 6.32E-08 |
| 36h | 5.31E-09  | 1.01E-08 | 5.83E-09 | 2.14E-07 |
| 48h | 1.33E-07  | 4.01E-08 | 1.21E-07 | 2.75E-07 |
| 72h | 3.88E-08  | 1.23E-08 | 2.59E-07 | 1.99E-07 |
|     | cgd2_4370 |          |          |          |
| 2h  | 1.36E-05  | 3.55E-06 | 1.23E-05 | 9.00E-05 |
| 6h  | 5.55E-07  | 1.25E-06 | 1.05E-07 | 3.00E-06 |
| 12h | 3.31E-06  | 1.22E-05 | 8.76E-06 | 2.39E-05 |
| 24h | 8.12E-07  | 1.76E-07 | 2.40E-06 | 4.72E-06 |
| 36h | 2.47E-06  | 8.12E-07 | 1.57E-06 | 3.70E-06 |
| 48h | 9.52E-06  | 1.69E-06 | 4.04E-06 | 1.05E-05 |
| 72h | 9.33E-07  | 2.23E-07 | 5.11E-07 | 2.59E-06 |
|     | cgd3_120  |          |          |          |
| 2h  | 1.48E-08  | 0.00E+00 | 4.64E-09 | 3.41E-09 |
| 6h  | 0.00E+00  | 4.68E-09 | 4.15E-09 | 1.07E-08 |
| 12h | 0.00E+00  | 3.21E-10 | 1.64E-09 | 5.82E-10 |
| 24h | 1.17E-08  | 6.93E-10 | 3.85E-09 | 9.55E-09 |
| 36h | 1.22E-09  | 1.04E-09 | 9.72E-09 | 9.15E-09 |
| 48h | 2.79E-08  | 1.53E-08 | 8.83E-09 | 2.52E-08 |
| 72h | 9.93E-09  | 1.35E-09 | 1.08E-08 | 1.98E-08 |
|     | cgd3_130  |          |          |          |
| 2h  | 0.00E+00  | 1.52E-09 | 5.87E-08 | 1.44E-07 |
| 6h  | 0.00E+00  | 2.39E-08 | 3.27E-08 | 1.93E-07 |
| 12h | 0.00E+00  | 3.43E-10 | 4.64E-08 | 3.49E-08 |
| 24h | 6.46E-09  | 1.56E-09 | 1.85E-08 | 2.74E-08 |
| 36h | 3.26E-09  | 3.42E-09 | 1.43E-09 | 3.76E-08 |
| 48h | 9.77E-08  | 1.87E-08 | 3.09E-08 | 2.38E-08 |
| 72h | 2.06E-08  | 3.18E-09 | 1.19E-08 | 5.95E-08 |
|     | cgd3_170  |          |          |          |
| 2h  | 2.74E-08  | 3.00E-08 | 7.34E-08 | 7.07E-08 |
| 6h  | 5.74E-08  | 5.77E-09 | 6.23E-09 | 2.03E-08 |
| 12h | 6.91E-09  | 1.18E-08 | 2.25E-08 | 7.46E-08 |
| 24h | 1.04E-08  | 5.02E-09 | 6.62E-09 | 1.58E-08 |
| 36h | 1.06E-08  | 3.63E-09 | 1.77E-08 | 1.93E-08 |
| 48h | 2.40E-08  | 4.23E-09 | 6.71E-09 | 1.15E-08 |
| 72h | 5.11E-09  | 2.03E-09 | 2.48E-08 | 2.42E-08 |
|     | cgd3_200  |          |          |          |
| 2h  | 3.14E-08  | 5.88E-08 | 2.24E-06 | 4.42E-06 |
| 6h  | 5.55E-08  | 1.86E-07 | 8.54E-07 | 9.21E-07 |
| 12h | 3.17E-08  | 5.15E-08 | 1.85E-06 | 1.42E-06 |
| 24h | 5.08E-08  | 3.65E-08 | 8.24E-07 | 4.95E-07 |
| 36h | 5.22E-08  | 4.88E-08 | 7.29E-08 | 7.04E-07 |
| 48h | 8.86E-07  | 5.74E-08 | 5.27E-07 | 3.74E-07 |
| 72h | 7.56E-08  | 2.71E-08 | 1.85E-07 | 3.66E-07 |
|     | cgd3_230  |          |          |          |
| 2h  | 0.00E+00  | 0.00E+00 | 0.00E+00 | 0.00E+00 |
| 6h  | 0.00E+00  | 0.00E+00 | 0.00E+00 | 0.00E+00 |
| 12h | 5.02E-08  | 6.93E-08 | 3.29E-07 | 8.08E-07 |
| 24h | 2.35E-09  | 8.30E-10 | 1.71E-07 | 5.12E-07 |
| 36h | 9.05E-07  | 2.20E-07 | 6.57E-07 | 1.41E-05 |
| 48h | 1.44E-05  | 2.06E-06 | 9.07E-06 | 1.10E-05 |
| 72h | 1.37E-05  | 5.25E-06 | 5.18E-05 | 6.59E-05 |

|     |          |          |          |          |
|-----|----------|----------|----------|----------|
|     | cgd3_320 |          |          |          |
| 2h  | 0.00E+00 | 0.00E+00 | 0.00E+00 | 0.00E+00 |
| 6h  | 5.81E-06 | 1.06E-05 | 2.46E-05 | 5.01E-04 |
| 12h | 6.65E-08 | 1.06E-06 | 2.02E-06 | 4.50E-06 |
| 24h | 1.42E-05 | 4.95E-06 | 8.94E-06 | 7.89E-05 |
| 36h | 5.61E-05 | 1.88E-05 | 6.39E-05 | 1.05E-04 |
| 48h | 2.28E-05 | 8.09E-06 | 6.40E-05 | 4.24E-05 |
| 72h | 5.95E-06 | 3.75E-06 | 2.47E-05 | 4.26E-05 |
|     | cgd3_490 |          |          |          |
| 2h  | 6.61E-09 | 2.23E-08 | 2.44E-07 | 1.88E-07 |
| 6h  | 5.27E-10 | 1.13E-09 | 9.27E-09 | 3.95E-09 |
| 12h | 1.75E-07 | 2.26E-07 | 2.51E-07 | 2.82E-07 |
| 24h | 8.26E-08 | 7.19E-08 | 1.79E-07 | 1.02E-07 |
| 36h | 1.04E-06 | 5.55E-07 | 8.15E-07 | 1.76E-06 |
| 48h | 1.14E-06 | 3.13E-07 | 7.20E-07 | 9.21E-07 |
| 72h | 3.61E-08 | 2.09E-08 | 1.23E-08 | 8.95E-08 |
|     | cgd3_540 |          |          |          |
| 2h  | 3.65E-09 | 1.78E-08 | 2.56E-08 | 1.13E-07 |
| 6h  | 3.76E-09 | 3.88E-09 | 7.73E-09 | 3.40E-08 |
| 12h | 5.51E-09 | 2.02E-08 | 5.18E-08 | 3.98E-08 |
| 24h | 2.22E-09 | 3.50E-09 | 3.43E-08 | 2.57E-08 |
| 36h | 8.98E-09 | 1.22E-08 | 1.57E-08 | 2.72E-08 |
| 48h | 7.32E-08 | 1.11E-08 | 4.73E-08 | 6.13E-08 |
| 72h | 9.25E-10 | 1.87E-09 | 3.57E-09 | 9.71E-09 |
|     | cgd3_820 |          |          |          |
| 2h  | 0.00E+00 | 0.00E+00 | 0.00E+00 | 0.00E+00 |
| 6h  | 8.74E-10 | 5.80E-10 | 5.49E-09 | 8.40E-10 |
| 12h | 1.79E-08 | 2.08E-08 | 1.07E-08 | 2.11E-08 |
| 24h | 3.05E-08 | 1.45E-08 | 9.39E-09 | 8.05E-09 |
| 36h | 1.15E-07 | 6.69E-08 | 5.10E-08 | 1.19E-07 |
| 48h | 3.53E-08 | 1.03E-08 | 1.60E-08 | 1.23E-07 |
| 72h | 5.10E-09 | 8.89E-09 | 1.44E-09 | 7.45E-09 |
|     | cgd3_830 |          |          |          |
| 2h  | 2.43E-07 | 1.74E-07 | 1.22E-07 | 8.28E-07 |
| 6h  | 1.71E-06 | 3.55E-07 | 5.46E-07 | 7.29E-07 |
| 12h | 4.52E-06 | 8.28E-07 | 1.24E-07 | 1.52E-06 |
| 24h | 1.03E-06 | 2.55E-07 | 7.29E-07 | 8.33E-07 |
| 36h | 2.57E-06 | 1.27E-06 | 4.14E-07 | 7.40E-07 |
| 48h | 5.34E-07 | 1.37E-07 | 1.84E-07 | 3.03E-07 |
| 72h | 1.45E-07 | 5.73E-08 | 4.07E-08 | 5.28E-08 |
|     | cgd3_840 |          |          |          |
| 2h  | 0.00E+00 | 2.63E-08 | 2.59E-08 | 1.24E-07 |
| 6h  | 6.21E-08 | 7.02E-08 | 1.43E-07 | 2.31E-07 |
| 12h | 1.90E-09 | 7.15E-09 | 3.89E-08 | 7.45E-08 |
| 24h | 5.77E-08 | 2.00E-08 | 1.36E-07 | 1.13E-07 |
| 36h | 1.74E-08 | 1.58E-08 | 2.03E-08 | 2.13E-07 |
| 48h | 3.17E-07 | 6.63E-08 | 1.92E-07 | 9.46E-08 |
| 72h | 2.92E-08 | 2.18E-09 | 9.00E-09 | 6.60E-08 |
|     | cgd3_870 |          |          |          |
| 2h  | 0.00E+00 | 0.00E+00 | 3.68E-08 | 1.17E-06 |
| 6h  | 1.85E-07 | 8.25E-08 | 1.23E-06 | 8.30E-07 |
| 12h | 0.00E+00 | 1.14E-08 | 2.74E-07 | 1.01E-08 |
| 24h | 2.99E-08 | 2.67E-07 | 6.76E-07 | 3.37E-06 |

|     |           |          |          |          |
|-----|-----------|----------|----------|----------|
| 36h | 3.85E-07  | 8.33E-08 | 1.79E-07 | 3.40E-06 |
| 48h | 8.85E-06  | 5.59E-07 | 1.86E-06 | 1.60E-06 |
| 72h | 9.27E-08  | 1.12E-07 | 2.05E-06 | 3.39E-06 |
|     | cgd3_910  |          |          |          |
| 2h  | 0.00E+00  | 0.00E+00 | 0.00E+00 | 0.00E+00 |
| 6h  | 0.00E+00  | 0.00E+00 | 0.00E+00 | 0.00E+00 |
| 12h | 2.02E-06  | 4.16E-06 | 2.32E-06 | 2.88E-06 |
| 24h | 2.55E-07  | 2.22E-07 | 4.12E-07 | 4.70E-07 |
| 36h | 2.95E-06  | 5.62E-07 | 2.97E-06 | 7.49E-06 |
| 48h | 5.17E-06  | 2.33E-07 | 9.86E-07 | 1.23E-06 |
| 72h | 3.53E-07  | 2.81E-07 | 3.39E-07 | 8.35E-07 |
|     | cgd3_920  |          |          |          |
| 2h  | 2.33E-09  | 1.20E-09 | 0.00E+00 | 0.00E+00 |
| 6h  | 0.00E+00  | 4.00E-10 | 0.00E+00 | 0.00E+00 |
| 12h | 2.78E-07  | 5.24E-07 | 1.43E-06 | 2.25E-06 |
| 24h | 1.72E-08  | 5.16E-09 | 1.34E-07 | 7.27E-08 |
| 36h | 4.70E-08  | 6.71E-08 | 2.43E-08 | 5.07E-07 |
| 48h | 2.19E-07  | 3.77E-08 | 2.41E-07 | 2.17E-07 |
| 72h | 1.61E-07  | 3.85E-08 | 1.59E-07 | 3.62E-07 |
|     | cgd3_990  |          |          |          |
| 2h  | 6.88E-09  | 3.73E-09 | 1.88E-08 | 1.96E-08 |
| 6h  | 8.38E-09  | 2.94E-08 | 2.59E-07 | 1.41E-07 |
| 12h | 5.24E-08  | 1.92E-09 | 6.60E-09 | 0.00E+00 |
| 24h | 3.85E-09  | 5.26E-09 | 7.74E-08 | 4.38E-08 |
| 36h | 1.85E-08  | 1.79E-08 | 2.21E-08 | 1.06E-07 |
| 48h | 6.00E-08  | 1.36E-08 | 3.31E-08 | 4.51E-08 |
| 72h | 1.96E-08  | 4.51E-09 | 2.02E-08 | 5.47E-08 |
|     | cgd3_1040 |          |          |          |
| 2h  | 0.00E+00  | 0.00E+00 | 0.00E+00 | 0.00E+00 |
| 6h  | 0.00E+00  | 0.00E+00 | 0.00E+00 | 0.00E+00 |
| 12h | 6.36E-09  | 6.66E-09 | 3.41E-09 | 3.85E-10 |
| 24h | 5.63E-10  | 6.54E-10 | 6.45E-10 | 5.85E-10 |
| 36h | 2.94E-09  | 2.77E-09 | 1.84E-09 | 1.05E-08 |
| 48h | 4.94E-09  | 7.19E-10 | 7.81E-10 | 4.38E-09 |
| 72h | 2.13E-08  | 8.29E-09 | 5.89E-08 | 3.34E-08 |
|     | cgd3_1110 |          |          |          |
| 2h  | 0.00E+00  | 1.68E-09 | 2.14E-09 | 1.47E-09 |
| 6h  | 1.13E-09  | 0.00E+00 | 2.22E-09 | 0.00E+00 |
| 12h | 4.49E-06  | 4.08E-08 | 1.91E-07 | 2.19E-07 |
| 24h | 9.83E-08  | 4.91E-08 | 3.45E-07 | 2.43E-06 |
| 36h | 7.03E-07  | 4.55E-07 | 9.87E-07 | 6.28E-07 |
| 48h | 2.00E-06  | 1.78E-07 | 3.78E-07 | 1.17E-06 |
| 72h | 9.02E-07  | 3.81E-07 | 8.21E-07 | 7.73E-07 |
|     | cgd3_1050 |          |          |          |
| 2h  | 0.00E+00  | 0.00E+00 | 0.00E+00 | 0.00E+00 |
| 6h  | 0.00E+00  | 1.71E-08 | 4.25E-07 | 2.34E-07 |
| 12h | 0.00E+00  | 1.21E-10 | 2.60E-09 | 1.29E-10 |
| 24h | 4.43E-06  | 2.94E-09 | 1.51E-07 | 1.60E-07 |
| 36h | 9.63E-09  | 1.09E-08 | 2.46E-08 | 4.47E-07 |
| 48h | 2.73E-07  | 4.51E-08 | 7.66E-08 | 3.05E-07 |
| 72h | 1.51E-07  | 3.50E-08 | 3.32E-07 | 1.61E-07 |
|     | cgd3_1450 |          |          |          |
| 2h  | 0.00E+00  | 1.63E-09 | 4.69E-09 | 8.07E-08 |

|     |           |          |          |          |
|-----|-----------|----------|----------|----------|
| 6h  | 2.12E-08  | 2.92E-08 | 1.08E-07 | 9.03E-08 |
| 12h | 0.00E+00  | 7.77E-09 | 2.82E-09 | 4.30E-09 |
| 24h | 5.10E-08  | 8.50E-09 | 1.51E-08 | 1.12E-07 |
| 36h | 7.69E-08  | 3.38E-08 | 2.68E-08 | 1.22E-07 |
| 48h | 1.39E-07  | 4.66E-08 | 4.30E-08 | 1.03E-07 |
| 72h | 3.74E-08  | 3.94E-09 | 4.59E-08 | 2.67E-08 |
|     | cgd3_1460 |          |          |          |
| 2h  | 1.49E-07  | 1.27E-07 | 3.08E-07 | 1.06E-06 |
| 6h  | 9.28E-09  | 2.27E-08 | 2.51E-07 | 3.00E-07 |
| 12h | 1.77E-08  | 3.09E-08 | 1.29E-07 | 1.06E-07 |
| 24h | 4.94E-08  | 3.60E-08 | 1.07E-07 | 2.99E-07 |
| 36h | 3.70E-08  | 2.48E-08 | 4.07E-08 | 2.63E-07 |
| 48h | 8.45E-07  | 1.99E-07 | 4.57E-07 | 6.82E-07 |
| 72h | 1.45E-07  | 4.15E-08 | 5.34E-07 | 1.85E-07 |
|     | cgd3_1470 |          |          |          |
| 2h  | 0.00E+00  | 4.58E-09 | 3.27E-09 | 6.32E-08 |
| 6h  | 7.21E-09  | 8.30E-09 | 4.71E-08 | 5.99E-08 |
| 12h | 6.72E-09  | 6.41E-09 | 1.47E-08 | 3.46E-08 |
| 24h | 6.05E-09  | 6.54E-09 | 2.98E-08 | 4.24E-08 |
| 36h | 2.40E-08  | 1.52E-08 | 2.82E-08 | 7.95E-08 |
| 48h | 2.96E-07  | 6.54E-08 | 6.86E-08 | 1.32E-07 |
| 72h | 4.75E-08  | 7.92E-09 | 1.37E-07 | 5.61E-08 |
|     | cgd3_1480 |          |          |          |
| 2h  | 0.00E+00  | 2.26E-09 | 0.00E+00 | 0.00E+00 |
| 6h  | 0.00E+00  | 0.00E+00 | 1.34E-08 | 2.50E-08 |
| 12h | 0.00E+00  | 1.77E-09 | 2.99E-09 | 2.27E-09 |
| 24h | 1.29E-09  | 5.93E-10 | 6.87E-09 | 1.40E-08 |
| 36h | 1.62E-08  | 6.99E-09 | 6.02E-08 | 1.20E-07 |
| 48h | 1.62E-07  | 3.49E-08 | 9.56E-08 | 7.60E-08 |
| 72h | 4.16E-08  | 1.00E-08 | 6.21E-08 | 6.29E-08 |
|     | cgd3_1500 |          |          |          |
| 2h  | 6.89E-09  | 3.60E-09 | 3.74E-08 | 1.19E-07 |
| 6h  | 6.04E-08  | 2.64E-08 | 1.57E-07 | 4.08E-07 |
| 12h | 7.12E-09  | 2.71E-09 | 6.38E-08 | 6.45E-08 |
| 24h | 1.12E-08  | 7.00E-09 | 1.20E-07 | 7.23E-08 |
| 36h | 9.47E-09  | 5.99E-09 | 2.56E-08 | 2.07E-07 |
| 48h | 4.59E-07  | 5.07E-08 | 6.26E-08 | 1.05E-07 |
| 72h | 2.74E-08  | 8.34E-10 | 8.04E-08 | 7.57E-08 |
|     | cgd3_1550 |          |          |          |
| 2h  | 4.32E-08  | 1.47E-07 | 4.61E-08 | 2.39E-07 |
| 6h  | 6.31E-09  | 5.36E-08 | 5.65E-08 | 2.67E-07 |
| 12h | 3.32E-09  | 1.61E-08 | 4.98E-08 | 1.29E-07 |
| 24h | 3.64E-08  | 7.36E-08 | 7.43E-08 | 8.05E-08 |
| 36h | 3.95E-08  | 2.47E-08 | 1.16E-07 | 2.93E-07 |
| 48h | 6.15E-07  | 1.43E-07 | 2.61E-07 | 5.08E-07 |
| 72h | 9.67E-07  | 1.63E-07 | 4.09E-06 | 3.87E-06 |
|     | cgd3_1580 |          |          |          |
| 2h  | 0.00E+00  | 0.00E+00 | 0.00E+00 | 0.00E+00 |
| 6h  | 0.00E+00  | 2.16E-05 | 5.12E-05 | 8.28E-05 |
| 12h | 6.06E-05  | 7.25E-06 | 2.83E-05 | 8.33E-06 |
| 24h | 2.49E-05  | 7.99E-06 | 9.07E-05 | 6.10E-05 |
| 36h | 7.42E-06  | 1.37E-05 | 7.79E-05 | 3.28E-05 |
| 48h | 1.07E-04  | 5.41E-05 | 5.21E-04 | 1.67E-04 |

|     |           |          |          |          |
|-----|-----------|----------|----------|----------|
| 72h | 2.60E-04  | 2.68E-05 | 1.58E-04 | 2.30E-04 |
|     | cgd3_1600 |          |          |          |
| 2h  | 1.53E-08  | 3.14E-08 | 2.05E-07 | 2.27E-07 |
| 6h  | 9.76E-08  | 1.23E-06 | 1.12E-06 | 2.75E-06 |
| 12h | 6.08E-09  | 1.52E-08 | 2.14E-07 | 2.54E-06 |
| 24h | 1.14E-07  | 1.42E-07 | 9.74E-07 | 1.11E-07 |
| 36h | 3.08E-07  | 1.05E-07 | 6.51E-07 | 2.49E-06 |
| 48h | 1.60E-06  | 3.10E-07 | 1.31E-06 | 7.96E-07 |
| 72h | 2.58E-07  | 2.15E-08 | 2.30E-07 | 5.51E-07 |
|     | cgd3_1610 |          |          |          |
| 2h  | 1.21E-07  | 2.73E-08 | 3.55E-07 | 2.24E-06 |
| 6h  | 7.25E-10  | 4.54E-08 | 1.99E-08 | 4.31E-08 |
| 12h | 9.02E-09  | 2.78E-08 | 3.26E-07 | 8.43E-08 |
| 24h | 1.08E-08  | 9.64E-09 | 7.24E-08 | 1.46E-07 |
| 36h | 2.98E-08  | 7.11E-09 | 2.45E-08 | 1.05E-07 |
| 48h | 1.93E-07  | 1.87E-08 | 1.15E-07 | 1.39E-07 |
| 72h | 6.38E-08  | 1.10E-08 | 3.32E-08 | 7.19E-08 |
|     | cgd3_1620 |          |          |          |
| 2h  | 6.89E-07  | 5.69E-07 | 6.24E-06 | 7.96E-06 |
| 6h  | 5.21E-08  | 5.02E-07 | 7.31E-07 | 6.92E-07 |
| 12h | 9.68E-09  | 2.35E-07 | 1.71E-06 | 1.01E-06 |
| 24h | 1.05E-07  | 1.25E-07 | 9.15E-07 | 1.46E-06 |
| 36h | 2.93E-07  | 1.01E-07 | 1.30E-06 | 1.20E-06 |
| 48h | 1.75E-06  | 1.49E-07 | 1.17E-06 | 1.77E-06 |
| 72h | 2.60E-06  | 3.30E-07 | 1.38E-06 | 1.81E-06 |
|     | cgd3_1630 |          |          |          |
| 2h  | 3.20E-07  | 1.38E-07 | 3.60E-07 | 1.15E-06 |
| 6h  | 3.18E-07  | 4.74E-07 | 1.47E-07 | 2.66E-07 |
| 12h | 2.37E-07  | 7.87E-08 | 1.29E-07 | 3.43E-07 |
| 24h | 2.05E-07  | 1.13E-07 | 2.40E-07 | 2.53E-07 |
| 36h | 4.18E-07  | 1.19E-07 | 2.18E-07 | 3.19E-07 |
| 48h | 1.82E-07  | 4.25E-08 | 2.93E-07 | 4.44E-07 |
| 72h | 3.07E-07  | 1.39E-07 | 3.13E-07 | 2.34E-07 |
|     | cgd3_1640 |          |          |          |
| 2h  | 2.04E-06  | 1.01E-05 | 1.26E-05 | 6.11E-05 |
| 6h  | 3.34E-07  | 6.94E-06 | 4.70E-06 | 2.53E-05 |
| 12h | 3.29E-06  | 5.76E-06 | 6.41E-06 | 1.52E-05 |
| 24h | 1.05E-06  | 2.32E-06 | 1.51E-05 | 5.95E-06 |
| 36h | 1.23E-05  | 6.33E-06 | 6.42E-06 | 4.09E-05 |
| 48h | 4.32E-05  | 4.12E-06 | 9.95E-06 | 4.38E-05 |
| 72h | 9.83E-06  | 1.94E-06 | 3.33E-06 | 1.55E-05 |
|     | cgd3_1670 |          |          |          |
| 2h  | 6.19E-05  | 1.79E-05 | 1.64E-05 | 1.91E-04 |
| 6h  | 3.89E-06  | 2.10E-06 | 1.08E-06 | 3.23E-06 |
| 12h | 3.60E-07  | 2.65E-07 | 3.99E-07 | 7.62E-09 |
| 24h | 1.06E-08  | 5.07E-09 | 8.08E-09 | 8.60E-07 |
| 36h | 4.23E-09  | 2.40E-09 | 3.45E-09 | 3.29E-09 |
| 48h | 3.71E-06  | 1.79E-06 | 4.70E-06 | 1.52E-05 |
| 72h | 3.01E-05  | 1.91E-05 | 7.59E-06 | 1.38E-05 |
|     | cgd3_1700 |          |          |          |
| 2h  | 0.00E+00  | 0.00E+00 | 0.00E+00 | 0.00E+00 |
| 6h  | 0.00E+00  | 0.00E+00 | 0.00E+00 | 0.00E+00 |
| 12h | 2.44E-10  | 1.74E-09 | 5.49E-09 | 8.30E-10 |

|           |          |          |          |          |
|-----------|----------|----------|----------|----------|
| 24h       | 0.00E+00 | 3.85E-10 | 9.75E-09 | 1.39E-08 |
| 36h       | 3.65E-09 | 2.28E-09 | 2.10E-09 | 1.38E-08 |
| 48h       | 2.14E-08 | 5.89E-09 | 3.13E-08 | 1.87E-08 |
| 72h       | 1.05E-08 | 2.26E-09 | 4.11E-08 | 1.96E-08 |
| cgd3_1760 |          |          |          |          |
| 2h        | 1.76E-08 | 1.25E-08 | 2.52E-08 | 2.00E-07 |
| 6h        | 0.00E+00 | 9.40E-11 | 7.73E-10 | 0.00E+00 |
| 12h       | 2.23E-07 | 8.21E-08 | 5.59E-08 | 1.70E-08 |
| 24h       | 1.58E-08 | 1.37E-08 | 5.08E-09 | 1.17E-07 |
| 36h       | 2.07E-07 | 9.57E-08 | 9.33E-08 | 1.55E-07 |
| 48h       | 4.37E-07 | 9.73E-08 | 6.62E-08 | 2.18E-07 |
| 72h       | 1.17E-07 | 4.55E-08 | 4.95E-08 | 1.14E-07 |
| cgd3_1770 |          |          |          |          |
| 2h        | 1.91E-09 | 0.00E+00 | 0.00E+00 | 1.04E-08 |
| 6h        | 0.00E+00 | 1.79E-10 | 1.37E-10 | 1.20E-10 |
| 12h       | 4.30E-07 | 6.47E-07 | 8.23E-07 | 1.35E-07 |
| 24h       | 1.04E-07 | 3.24E-08 | 1.22E-07 | 7.04E-07 |
| 36h       | 1.18E-07 | 3.59E-08 | 8.03E-08 | 3.16E-07 |
| 48h       | 2.42E-07 | 1.98E-08 | 7.42E-08 | 4.23E-08 |
| 72h       | 4.15E-08 | 3.17E-09 | 4.24E-08 | 7.51E-08 |
| cgd3_1820 |          |          |          |          |
| 2h        | 8.16E-09 | 1.12E-07 | 8.42E-08 | 2.89E-07 |
| 6h        | 1.46E-06 | 1.20E-05 | 9.84E-06 | 1.02E-05 |
| 12h       | 4.43E-08 | 8.83E-08 | 3.60E-07 | 2.37E-06 |
| 24h       | 5.08E-07 | 4.67E-06 | 1.72E-06 | 4.40E-06 |
| 36h       | 2.25E-07 | 8.69E-07 | 3.35E-06 | 8.37E-06 |
| 48h       | 1.06E-06 | 6.59E-06 | 1.60E-06 | 3.95E-06 |
| 72h       | 2.01E-07 | 4.33E-07 | 1.49E-06 | 2.32E-06 |
| cgd3_1990 |          |          |          |          |
| 2h        | 7.69E-09 | 3.39E-08 | 7.94E-08 | 4.20E-07 |
| 6h        | 5.26E-08 | 5.41E-07 | 6.41E-07 | 1.35E-06 |
| 12h       | 1.92E-09 | 4.04E-08 | 7.75E-07 | 2.68E-08 |
| 24h       | 8.88E-10 | 1.92E-07 | 1.16E-07 |          |
| 36h       | 3.86E-09 | 2.27E-09 | 7.60E-08 | 6.08E-07 |
| 48h       | 2.21E-08 | 2.18E-07 | 1.31E-07 | 1.31E-07 |
| 72h       | 1.06E-08 | 2.89E-08 | 1.07E-07 | 2.87E-07 |
| cgd3_2020 |          |          |          |          |
| 2h        | 8.09E-08 | 0.00E+00 | 0.00E+00 | 0.00E+00 |
| 6h        | 3.78E-07 | 5.28E-06 | 3.14E-06 | 1.08E-05 |
| 12h       | 4.13E-08 | 1.63E-07 | 2.10E-07 | 2.41E-06 |
| 24h       | 1.06E-07 | 3.82E-06 | 1.21E-06 | 1.86E-06 |
| 36h       | 3.24E-07 | 5.22E-07 | 4.43E-06 | 1.67E-05 |
| 48h       | 1.43E-06 | 4.18E-06 | 1.40E-06 | 3.70E-06 |
| 72h       | 9.07E-08 | 7.09E-07 | 1.14E-06 | 8.12E-07 |
| cgd3_2080 |          |          |          |          |
| 2h        | 8.93E-07 | 2.43E-05 | 3.89E-06 | 1.53E-04 |
| 6h        | 4.22E-08 | 5.00E-07 | 1.74E-06 | 2.94E-06 |
| 12h       | 2.65E-06 | 4.26E-06 | 2.00E-07 | 5.30E-05 |
| 24h       | 2.55E-07 | 8.86E-06 | 5.02E-06 | 3.09E-05 |
| 36h       | 2.28E-06 | 1.84E-05 | 3.37E-05 | 2.52E-04 |
| 48h       | 1.33E-05 | 4.62E-05 | 2.77E-05 | 7.61E-05 |
| 72h       | 1.04E-06 | 2.11E-05 | 4.50E-05 | 3.72E-05 |
| cgd3_2110 |          |          |          |          |

|     |           |          |          |          |
|-----|-----------|----------|----------|----------|
| 2h  | 2.19E-06  | 3.30E-06 | 1.51E-05 | 4.28E-05 |
| 6h  | 1.55E-06  | 2.36E-06 | 2.75E-06 | 2.37E-05 |
| 12h | 2.58E-06  | 6.82E-06 | 7.74E-06 | 4.30E-05 |
| 24h | 3.68E-07  | 5.84E-06 | 3.14E-06 | 4.17E-05 |
| 36h | 1.39E-06  | 3.33E-07 | 2.16E-06 | 2.91E-05 |
| 48h | 1.30E-06  | 2.74E-06 | 2.71E-06 | 1.08E-05 |
| 72h | 1.90E-07  | 9.88E-07 | 1.29E-06 | 4.97E-06 |
|     | cgd3_2150 |          |          |          |
| 2h  | 0.00E+00  | 0.00E+00 | 0.00E+00 | 7.00E-10 |
| 6h  | 2.81E-07  | 1.63E-06 | 1.12E-06 | 1.91E-06 |
| 12h | 1.84E-08  | 5.54E-09 | 3.27E-09 | 1.60E-07 |
| 24h | 1.38E-07  | 6.11E-07 | 6.98E-07 | 3.26E-07 |
| 36h | 2.53E-07  | 4.11E-07 | 8.56E-07 | 1.61E-06 |
| 48h | 1.72E-07  | 2.91E-07 | 5.38E-07 | 6.62E-07 |
| 72h | 1.80E-08  | 1.74E-07 | 2.11E-07 | 7.49E-08 |
|     | cgd3_2180 |          |          |          |
| 2h  | 0.00E+00  | 0.00E+00 | 4.06E-09 | 0.00E+00 |
| 6h  | 4.04E-10  | 3.00E-08 | 1.75E-08 | 2.87E-09 |
| 12h | 8.64E-11  | 4.40E-09 | 1.29E-10 | 1.71E-08 |
| 24h | 0.00E+00  | 6.91E-10 | 5.17E-09 | 1.81E-08 |
| 36h | 1.70E-10  | 6.79E-11 | 7.88E-09 | 2.12E-07 |
| 48h | 1.82E-07  | 1.48E-07 | 4.25E-07 | 1.76E-06 |
| 72h | 2.68E-09  | 1.20E-07 | 1.14E-07 | 1.17E-07 |
|     | cgd3_2190 |          |          |          |
| 2h  | 4.23E-09  | 1.24E-08 | 7.43E-07 | 2.37E-07 |
| 6h  | 1.38E-07  | 4.23E-07 | 4.29E-07 | 6.16E-07 |
| 12h | 4.07E-08  | 6.85E-08 | 2.60E-07 | 2.07E-06 |
| 24h | 3.11E-08  | 3.12E-07 | 3.36E-07 | 7.34E-07 |
| 36h | 4.58E-08  | 3.51E-07 | 1.28E-06 | 2.89E-06 |
| 48h | 4.54E-07  | 1.48E-06 | 1.06E-06 | 1.28E-06 |
| 72h | 2.24E-08  | 2.46E-07 | 5.82E-07 | 2.44E-07 |
|     | cgd3_2220 |          |          |          |
| 2h  | 5.28E-09  | 1.49E-08 | 4.04E-08 | 1.32E-07 |
| 6h  | 1.14E-07  | 3.12E-07 | 2.14E-07 | 3.80E-07 |
| 12h | 1.04E-08  | 1.07E-08 | 4.10E-08 | 5.72E-08 |
| 24h | 1.21E-07  | 1.21E-07 | 1.48E-07 | 2.17E-07 |
| 36h | 1.09E-07  | 2.20E-07 | 2.85E-07 | 2.30E-07 |
| 48h | 1.54E-07  | 1.23E-07 | 2.84E-07 | 4.68E-07 |
| 72h | 3.31E-09  | 4.89E-08 | 6.14E-08 | 1.45E-08 |
|     | cgd3_2230 |          |          |          |
| 2h  | 1.23E-09  | 4.02E-10 | 5.37E-08 | 2.78E-07 |
| 6h  | 3.63E-08  | 1.41E-07 | 2.51E-07 | 1.03E-06 |
| 12h | 1.12E-09  | 9.44E-09 | 1.19E-08 | 4.96E-08 |
| 24h | 1.58E-08  | 1.10E-07 | 8.37E-08 | 2.15E-07 |
| 36h | 1.20E-08  | 2.46E-08 | 1.31E-07 | 3.48E-07 |
| 48h | 8.00E-08  | 1.68E-07 | 2.87E-07 | 3.31E-07 |
| 72h | 4.16E-09  | 4.11E-08 | 5.06E-08 | 3.27E-08 |
|     | cgd3_2240 |          |          |          |
| 2h  | 4.22E-09  | 4.33E-09 | 1.16E-08 | 1.60E-08 |
| 6h  | 2.65E-07  | 4.10E-07 | 1.00E-06 | 2.35E-06 |
| 12h | 1.21E-08  | 4.48E-09 | 5.86E-09 | 1.14E-07 |
| 24h | 9.69E-08  | 2.07E-07 | 1.54E-07 | 2.88E-07 |
| 36h | 2.61E-07  | 6.77E-07 | 6.60E-07 | 6.44E-07 |



|     |           |          |          |          |
|-----|-----------|----------|----------|----------|
| 48h | 2.44E-07  | 2.66E-07 | 5.52E-07 | 5.00E-07 |
| 72h | 6.93E-09  | 6.47E-08 | 1.33E-07 | 4.50E-08 |
|     | cgd3_2410 |          |          |          |
| 2h  | 2.10E-06  | 1.04E-05 | 9.22E-06 | 9.56E-05 |
| 6h  | 1.45E-05  | 8.79E-05 | 4.66E-05 | 5.81E-04 |
| 12h | 4.34E-07  | 9.21E-06 | 3.94E-06 | 2.03E-05 |
| 24h | 2.09E-06  | 7.28E-05 | 5.85E-05 | 1.34E-04 |
| 36h | 5.93E-06  | 2.55E-05 | 2.61E-05 | 3.77E-04 |
| 48h | 1.01E-05  | 4.21E-05 | 2.21E-05 | 2.02E-04 |
| 72h | 4.22E-06  | 9.54E-06 | 2.77E-05 | 3.04E-05 |
|     | cgd3_2490 |          |          |          |
| 2h  | 6.90E-08  | 1.23E-05 | 1.50E-05 | 2.21E-05 |
| 6h  | 9.61E-08  | 0.00E+00 | 7.08E-06 | 1.88E-06 |
| 12h | 9.61E-09  | 0.00E+00 | 2.48E-07 | 3.49E-08 |
| 24h | 3.80E-08  | 7.85E-07 | 2.26E-06 | 1.47E-06 |
| 36h | 1.52E-06  | 4.65E-06 | 3.80E-05 | 1.68E-06 |
| 48h | 2.40E-05  | 1.11E-04 | 4.53E-04 | 1.67E-04 |
| 72h | 7.75E-07  | 1.39E-05 | 3.39E-05 | 9.97E-06 |
|     | cgd3_2500 |          |          |          |
| 2h  | 8.66E-05  | 3.36E-04 | 9.68E-04 | 1.16E-04 |
| 6h  | 2.54E-05  | 2.61E-04 | 2.60E-04 | 9.67E-05 |
| 12h | 7.31E-06  | 3.96E-06 | 1.28E-04 | 4.05E-05 |
| 24h | 1.59E-05  | 1.51E-04 | 3.98E-04 | 9.80E-05 |
| 36h | 6.49E-06  | 9.95E-06 | 4.02E-05 | 1.21E-05 |
| 48h | 2.81E-05  | 3.62E-05 | 1.53E-04 | 5.74E-05 |
| 72h | 2.76E-06  | 3.57E-05 | 0.00E+00 | 5.15E-06 |
|     | cgd3_2390 |          |          |          |
| 2h  | 1.20E-06  | 4.65E-06 | 2.63E-05 | 2.20E-05 |
| 6h  | 1.82E-05  | 5.97E-05 | 1.36E-04 | 2.83E-04 |
| 12h | 1.17E-06  | 1.44E-06 | 6.41E-05 | 4.92E-05 |
| 24h | 9.70E-06  | 1.67E-05 | 5.17E-05 | 4.18E-05 |
| 36h | 3.07E-06  | 2.92E-06 | 6.33E-05 | 1.25E-05 |
| 48h | 2.24E-06  | 1.85E-06 | 1.73E-05 | 8.64E-06 |
| 72h | 4.61E-07  | 1.01E-06 | 1.46E-05 | 1.58E-06 |
|     | cgd3_2510 |          |          |          |
| 2h  | 1.02E-08  | 1.04E-08 | 9.67E-08 | 2.57E-07 |
| 6h  | 5.01E-08  | 2.64E-08 | 2.51E-08 | 2.14E-07 |
| 12h | 1.48E-08  | 5.52E-08 | 3.61E-07 | 3.72E-07 |
| 24h | 7.86E-08  | 3.94E-08 | 9.32E-08 | 7.81E-08 |
| 36h | 4.53E-08  | 4.00E-08 | 4.00E-07 | 1.08E-07 |
| 48h | 3.76E-08  | 2.21E-08 | 1.35E-07 | 3.92E-08 |
| 72h | 1.47E-08  | 3.76E-08 | 1.35E-07 | 2.56E-08 |
|     | cgd3_2530 |          |          |          |
| 2h  | 4.07E-08  | 8.23E-08 | 8.97E-08 | 9.05E-08 |
| 6h  | 5.51E-07  | 6.56E-07 | 3.31E-06 | 3.40E-06 |
| 12h | 4.98E-08  | 2.62E-07 | 7.27E-07 | 1.02E-06 |
| 24h | 1.12E-07  | 1.16E-07 | 1.03E-06 | 2.09E-06 |
| 36h | 5.18E-07  | 6.78E-07 | 3.87E-06 | 2.48E-06 |
| 48h | 3.76E-07  | 3.15E-07 | 1.47E-06 | 8.64E-07 |
| 72h | 1.22E-07  | 1.82E-07 | 3.30E-07 | 2.43E-07 |
|     | cgd3_2550 |          |          |          |
| 2h  | 5.40E-07  | 4.44E-07 | 2.26E-06 | 4.41E-06 |
| 6h  | 5.20E-07  | 4.52E-07 | 3.13E-06 | 1.84E-06 |

|     |           |          |          |          |
|-----|-----------|----------|----------|----------|
| 12h | 5.58E-07  | 1.04E-06 | 4.12E-06 | 8.95E-06 |
| 24h | 8.30E-07  | 3.42E-07 | 2.61E-06 | 1.83E-06 |
| 36h | 6.11E-07  | 7.16E-07 | 4.84E-06 | 3.95E-06 |
| 48h | 1.59E-07  | 2.43E-07 | 1.79E-06 | 1.70E-06 |
| 72h | 2.63E-07  | 5.03E-07 | 9.60E-07 | 4.62E-07 |
|     | cgd3_2580 |          |          |          |
| 2h  | 4.90E-05  | 1.86E-05 | 1.06E-04 | 9.10E-05 |
| 6h  | 8.11E-05  | 9.58E-05 | 4.06E-04 | 1.38E-04 |
| 12h | 6.33E-05  | 1.59E-04 | 4.25E-04 | 5.45E-04 |
| 24h | 8.51E-05  | 5.37E-05 | 4.80E-04 | 3.43E-05 |
| 36h | 2.05E-04  | 3.34E-04 | 8.15E-04 | 1.35E-04 |
| 48h | 1.70E-04  | 3.73E-04 | 6.65E-04 | 2.46E-04 |
| 72h | 5.39E-05  | 1.53E-04 | 6.08E-04 | 7.24E-05 |
|     | cgd3_2590 |          |          |          |
| 2h  | 5.14E-08  | 6.19E-08 | 3.89E-07 | 6.60E-08 |
| 6h  | 1.75E-07  | 4.24E-07 | 2.64E-06 | 1.31E-06 |
| 12h | 1.87E-08  | 5.28E-08 | 2.94E-07 | 5.07E-07 |
| 24h | 3.45E-08  | 1.90E-08 | 9.65E-07 | 1.24E-06 |
| 36h | 8.44E-07  | 2.95E-07 | 9.00E-07 | 0.00E+00 |
| 48h | 1.10E-07  | 2.30E-07 | 3.01E-07 | 1.18E-06 |
| 72h | 1.40E-07  | 1.17E-07 | 2.04E-07 | 9.55E-08 |
|     | cgd3_2600 |          |          |          |
| 2h  | 1.43E-07  | 7.64E-08 | 8.72E-07 | 3.37E-07 |
| 6h  | 2.97E-07  | 7.17E-07 | 9.35E-06 | 1.43E-06 |
| 12h | 0.00E+00  | 1.52E-08 | 5.56E-07 | 4.10E-06 |
| 24h | 2.18E-06  | 1.66E-04 | 8.05E-04 | 0.00E+00 |
| 36h | 2.81E-07  | 4.11E-07 | 5.01E-06 | 9.25E-04 |
| 48h | 1.52E-05  | 2.54E-04 | 0.00E+00 | 0.00E+00 |
| 72h | 0.00E+00  | 0.00E+00 | 0.00E+00 | 0.00E+00 |
|     | cgd3_2610 |          |          |          |
| 2h  | 1.73E-06  | 1.08E-05 | 0.00E+00 | 1.50E-06 |
| 6h  | 8.12E-06  | 1.27E-05 | 6.19E-05 | 1.03E-03 |
| 12h | 4.70E-07  | 1.78E-06 | 4.42E-06 | 2.99E-05 |
| 24h | 2.14E-06  | 3.51E-06 | 8.67E-05 | 4.02E-05 |
| 36h | 5.59E-06  | 5.07E-06 | 4.52E-05 | 7.20E-06 |
| 48h | 2.84E-06  | 1.10E-05 | 3.40E-05 | 4.82E-05 |
| 72h | 6.60E-07  | 1.59E-06 | 6.61E-06 | 1.90E-06 |
|     | cgd3_2620 |          |          |          |
| 2h  | 0.00E+00  | 9.14E-05 | 6.35E-04 | 1.16E-04 |
| 6h  | 0.00E+00  | 1.73E-04 | 2.12E-03 | 1.62E-03 |
| 12h | 0.00E+00  | 1.01E-05 | 5.46E-04 | 3.17E-04 |
| 24h | 0.00E+00  | 1.69E-05 | 4.15E-04 | 5.59E-04 |
| 36h | 0.00E+00  | 4.53E-05 | 2.41E-04 | 5.15E-05 |
| 48h | 0.00E+00  | 2.54E-05 | 7.61E-05 | 3.72E-05 |
| 72h | 0.00E+00  | 6.40E-06 | 2.75E-05 | 3.98E-06 |
|     | cgd3_2630 |          |          |          |
| 2h  | 2.28E-05  | 1.40E-07 | 3.57E-07 | 1.42E-06 |
| 6h  | 4.24E-05  | 9.14E-08 | 2.15E-06 | 8.68E-07 |
| 12h | 4.24E-06  | 1.02E-08 | 2.08E-07 | 3.29E-07 |
| 24h | 3.62E-05  | 6.47E-08 | 4.64E-07 | 4.83E-07 |
| 36h | 6.46E-05  | 9.78E-08 | 2.19E-07 | 1.60E-07 |
| 48h | 6.52E-06  | 8.95E-08 | 3.60E-07 | 1.98E-07 |
| 72h | 1.38E-06  | 4.45E-08 | 3.74E-08 | 9.41E-09 |

|     |           |          |          |          |
|-----|-----------|----------|----------|----------|
|     | cgd1_3660 |          |          |          |
| 2h  | 0.00E+00  | 3.03E-06 | 1.13E-05 | 4.51E-05 |
| 6h  | 1.74E-03  | 2.65E-04 | 8.72E-05 | 6.84E-05 |
| 12h | 7.98E-04  | 3.76E-05 | 3.50E-05 | 2.36E-05 |
| 24h | 7.45E-04  | 6.69E-05 | 2.98E-04 | 7.51E-05 |
| 36h | 1.11E-03  | 1.65E-04 | 2.06E-05 | 7.31E-05 |
| 48h | 1.09E-03  | 1.03E-04 | 2.65E-05 | 6.43E-05 |
| 72h | 4.88E-04  | 2.78E-05 | 2.41E-05 | 4.74E-05 |
|     | cgd1_3680 |          |          |          |
| 2h  | 0.00E+00  | 0.00E+00 | 0.00E+00 | 0.00E+00 |
| 6h  | 0.00E+00  | 0.00E+00 | 0.00E+00 | 0.00E+00 |
| 12h | 4.80E-08  | 1.58E-08 | 1.44E-07 | 6.70E-08 |
| 24h | 8.81E-09  | 2.30E-08 | 9.19E-08 | 8.56E-07 |
| 36h | 5.58E-07  | 2.29E-07 | 1.03E-06 | 1.36E-06 |
| 48h | 2.71E-07  | 1.45E-07 | 1.16E-06 | 5.05E-07 |
| 72h | 1.99E-06  | 3.36E-07 | 2.39E-06 | 1.46E-06 |
|     | cgd1_3690 |          |          |          |
| 2h  | 6.67E-07  | 3.78E-08 | 0.00E+00 | 2.25E-05 |
| 6h  | 3.41E-04  | 8.57E-05 | 1.93E-05 | 1.28E-03 |
| 12h | 7.35E-03  | 1.48E-03 | 9.12E-04 | 1.69E-03 |
| 24h | 1.46E-03  | 5.70E-04 | 5.40E-04 | 1.38E-03 |
| 36h | 2.21E-03  | 4.40E-04 | 1.02E-03 | 4.83E-03 |
| 48h | 1.07E-03  | 2.20E-04 | 3.08E-04 | 1.04E-03 |
| 72h | 1.71E-04  | 1.73E-05 | 1.67E-04 | 1.38E-04 |
|     | cgd1_3700 |          |          |          |
| 2h  | 1.45E-07  | 7.42E-08 | 0.00E+00 | 0.00E+00 |
| 6h  | 6.66E-05  | 2.51E-05 | 1.89E-05 | 2.76E-05 |
| 12h | 7.81E-05  | 6.58E-05 | 7.60E-05 | 5.52E-05 |
| 24h | 1.68E-05  | 1.23E-05 | 6.28E-05 | 8.18E-05 |
| 36h | 4.13E-05  | 1.51E-05 | 3.97E-04 | 8.95E-05 |
| 48h | 7.22E-05  | 4.13E-05 | 1.49E-04 | 1.46E-04 |
| 72h | 1.46E-05  | 2.86E-06 | 2.55E-05 | 1.08E-05 |
|     | cgd1_3710 |          |          |          |
| 2h  | 5.94E-05  | 0.00E+00 | 0.00E+00 | 1.13E-07 |
| 6h  | 8.12E-03  | 1.72E-03 | 2.65E-04 | 1.56E-03 |
| 12h | 8.80E-04  | 4.72E-05 | 8.02E-05 | 1.60E-04 |
| 24h | 6.39E-03  | 7.53E-04 | 6.01E-04 | 5.18E-04 |
| 36h | 2.70E-03  | 6.00E-04 | 3.06E-04 | 5.14E-04 |
| 48h | 6.78E-03  | 1.30E-03 | 2.00E-04 | 3.25E-04 |
| 72h | 1.74E-03  | 1.53E-04 | 5.85E-05 | 1.38E-04 |
|     | cgd1_3720 |          |          |          |
| 2h  | 0.00E+00  | 0.00E+00 | 0.00E+00 | 0.00E+00 |
| 6h  | 7.95E-04  | 4.73E-05 | 2.93E-04 | 5.99E-04 |
| 12h | 5.32E-05  | 4.29E-05 | 3.38E-04 | 2.06E-04 |
| 24h | 1.23E-04  | 1.73E-05 | 2.84E-04 | 3.14E-04 |
| 36h | 1.56E-04  | 1.54E-05 | 1.77E-04 | 1.09E-03 |
| 48h | 1.32E-04  | 2.76E-05 | 1.58E-04 | 1.96E-04 |
| 72h | 8.43E-05  | 4.66E-06 | 6.68E-05 | 1.65E-04 |
|     | cgd1_3730 |          |          |          |
| 2h  | 0.00E+00  | 0.00E+00 | 0.00E+00 | 0.00E+00 |
| 6h  | 0.00E+00  | 0.00E+00 | 0.00E+00 | 0.00E+00 |
| 12h | 0.00E+00  | 1.65E-07 | 1.60E-06 | 7.54E-08 |
| 24h | 1.34E-07  | 8.45E-08 | 1.68E-06 | 4.19E-07 |

|     |           |          |          |          |
|-----|-----------|----------|----------|----------|
| 36h | 5.10E-07  | 1.01E-06 | 2.60E-05 | 1.22E-05 |
| 48h | 1.31E-05  | 2.30E-06 | 5.12E-05 | 5.67E-05 |
| 72h | 2.22E-05  | 2.62E-06 | 8.10E-05 | 6.15E-05 |
|     | cgd1_3740 |          |          |          |
| 2h  | 0.00E+00  | 0.00E+00 | 0.00E+00 | 0.00E+00 |
| 6h  | 0.00E+00  | 4.15E-06 | 2.10E-04 | 5.96E-06 |
| 12h | 1.09E-05  | 2.11E-07 | 3.73E-05 | 8.55E-05 |
| 24h | 4.27E-05  | 7.85E-06 | 2.52E-04 | 1.75E-04 |
| 36h | 3.27E-04  | 6.61E-05 | 8.57E-05 | 7.20E-05 |
| 48h | 1.42E-04  | 2.73E-05 | 5.17E-05 | 3.18E-04 |
| 72h | 4.51E-04  | 7.06E-05 | 1.17E-04 | 1.59E-05 |
|     | cgd1_3760 |          |          |          |
| 2h  | 3.94E-07  | 0.00E+00 | 0.00E+00 | 0.00E+00 |
| 6h  | 1.35E-04  | 1.62E-04 | 4.47E-04 | 1.63E-04 |
| 12h | 2.33E-06  | 3.37E-06 | 1.82E-05 | 7.26E-06 |
| 24h | 1.94E-05  | 1.48E-04 | 5.39E-04 | 4.80E-05 |
| 36h | 1.87E-05  | 1.45E-04 | 1.35E-04 | 1.23E-05 |
| 48h | 3.94E-05  | 1.68E-04 | 3.81E-05 | 1.50E-05 |
| 72h | 6.42E-06  | 1.55E-04 | 5.11E-05 | 3.74E-06 |
|     | cgd1_3770 |          |          |          |
| 2h  | 0.00E+00  | 0.00E+00 | 0.00E+00 | 0.00E+00 |
| 6h  | 0.00E+00  | 0.00E+00 | 0.00E+00 | 0.00E+00 |
| 12h | 8.03E-09  | 4.48E-09 | 3.67E-08 | 2.72E-08 |
| 24h | 2.77E-08  | 9.16E-08 | 2.38E-08 | 3.28E-09 |
| 36h | 4.58E-08  | 8.27E-08 | 1.86E-07 | 6.56E-08 |
| 48h | 5.88E-08  | 2.67E-07 | 2.33E-08 | 1.37E-08 |
| 72h | 2.91E-08  | 9.55E-08 | 4.52E-07 | 4.65E-08 |
|     | cgd1_3780 |          |          |          |
| 2h  | 1.03E-07  | 5.52E-08 | 0.00E+00 | 5.70E-08 |
| 6h  | 7.24E-08  | 7.34E-08 | 1.41E-08 | 3.22E-08 |
| 12h | 7.69E-05  | 5.53E-05 | 4.26E-05 | 5.53E-05 |
| 24h | 2.96E-05  | 2.45E-05 | 1.12E-05 | 2.75E-06 |
| 36h | 8.74E-06  | 1.33E-05 | 4.74E-05 | 4.82E-05 |
| 48h | 1.65E-05  | 6.23E-06 | 6.71E-06 | 3.27E-06 |
| 72h | 9.91E-07  | 1.10E-06 | 6.38E-07 | 1.35E-06 |
|     | cgd1_3800 |          |          |          |
| 2h  | 4.09E-08  | 7.58E-09 | 1.99E-09 | 4.77E-09 |
| 6h  | 7.29E-08  | 0.00E+00 | 1.38E-09 | 2.17E-08 |
| 12h | 5.92E-06  | 7.89E-06 | 5.90E-06 | 3.86E-06 |
| 24h | 5.89E-07  | 2.03E-06 | 4.53E-07 | 2.23E-07 |
| 36h | 5.63E-07  | 1.21E-06 | 4.34E-06 | 2.78E-06 |
| 48h | 4.74E-07  | 6.30E-07 | 1.84E-06 | 5.53E-07 |
| 72h | 2.36E-07  | 1.26E-06 | 7.52E-07 | 4.50E-07 |
|     | cgd3_3060 |          |          |          |
| 2h  | 3.09E-03  | 3.34E-03 | 4.15E-02 | 1.19E-02 |
| 6h  | 6.97E-03  | 8.02E-03 | 1.70E-02 | 2.39E-02 |
| 12h | 1.12E-03  | 2.89E-04 | 2.75E-03 | 3.43E-02 |
| 24h | 4.29E-04  | 7.57E-04 | 4.43E-03 | 4.71E-03 |
| 36h | 2.16E-03  | 7.63E-04 | 3.09E-03 | 2.12E-03 |
| 48h | 1.25E-03  | 8.45E-04 | 8.39E-04 | 4.95E-03 |
| 72h | 1.45E-04  | 1.75E-04 | 1.34E-03 | 1.96E-04 |
|     | cgd3_3070 |          |          |          |
| 2h  | 4.32E-08  | 3.52E-08 | 1.92E-07 | 1.66E-08 |

|     |           |          |          |          |
|-----|-----------|----------|----------|----------|
| 6h  | 3.91E-07  | 1.04E-07 | 1.43E-06 | 7.39E-07 |
| 12h | 7.47E-09  | 3.60E-10 | 3.06E-08 | 2.14E-07 |
| 24h | 1.90E-08  | 1.76E-08 | 3.53E-07 | 4.81E-07 |
| 36h | 4.28E-08  | 6.79E-08 | 4.65E-07 | 1.07E-07 |
| 48h | 1.39E-08  | 2.53E-08 | 1.39E-07 | 1.38E-07 |
| 72h | 6.64E-09  | 4.71E-08 | 7.08E-08 | 1.49E-09 |
|     | cgd3_3090 |          |          |          |
| 2h  | 0.00E+00  | 0.00E+00 | 0.00E+00 | 0.00E+00 |
| 6h  | 0.00E+00  | 0.00E+00 | 0.00E+00 | 1.04E-05 |
| 12h | 5.26E-07  | 2.44E-06 | 2.13E-06 | 3.36E-05 |
| 24h | 8.83E-07  | 1.86E-06 | 6.25E-05 | 2.60E-05 |
| 36h | 1.61E-05  | 1.07E-05 | 6.09E-05 | 1.70E-05 |
| 48h | 2.75E-06  | 7.60E-06 | 4.19E-05 | 2.58E-05 |
| 72h | 2.90E-06  | 8.68E-06 | 4.00E-05 | 8.09E-06 |
|     | cgd3_3120 |          |          |          |
| 2h  | 3.95E-05  | 1.16E-04 | 3.35E-04 | 1.21E-04 |
| 6h  | 2.78E-05  | 2.37E-05 | 1.85E-04 | 3.39E-04 |
| 12h | 5.23E-05  | 1.57E-05 | 7.55E-05 | 2.41E-04 |
| 24h | 3.86E-06  | 7.55E-06 | 4.16E-05 | 1.97E-05 |
| 36h | 1.32E-05  | 9.50E-06 | 1.16E-04 | 8.90E-05 |
| 48h | 5.72E-06  | 1.11E-05 | 1.19E-04 | 4.56E-05 |
| 72h | 1.33E-05  | 1.17E-05 | 6.63E-05 | 1.14E-05 |
|     | cgd3_3150 |          |          |          |
| 2h  | 7.93E-09  | 0.00E+00 | 0.00E+00 | 0.00E+00 |
| 6h  | 6.12E-07  | 2.99E-07 | 2.19E-06 | 6.32E-06 |
| 12h | 6.58E-08  | 5.74E-08 | 7.59E-08 | 5.00E-07 |
| 24h | 2.54E-08  | 3.71E-08 | 1.37E-06 | 7.65E-07 |
| 36h | 4.21E-07  | 3.94E-07 | 2.49E-06 | 1.30E-06 |
| 48h | 4.84E-08  | 5.13E-08 | 5.78E-07 | 3.62E-07 |
| 72h | 8.04E-08  | 7.78E-08 | 1.14E-07 | 5.44E-08 |
|     | cgd3_3160 |          |          |          |
| 2h  | 5.86E-07  | 4.73E-07 | 2.60E-06 | 1.33E-06 |
| 6h  | 2.61E-06  | 1.20E-06 | 2.91E-05 | 7.26E-05 |
| 12h | 9.40E-08  | 2.32E-08 | 1.67E-06 | 3.37E-06 |
| 24h | 3.97E-07  | 1.57E-07 | 5.87E-06 | 7.46E-06 |
| 36h | 1.57E-06  | 1.17E-06 | 8.26E-06 | 2.84E-06 |
| 48h | 3.40E-07  | 3.49E-07 | 3.16E-06 | 1.36E-06 |
| 72h | 1.19E-07  | 1.88E-07 | 7.61E-07 | 2.81E-07 |
|     | cgd3_3170 |          |          |          |
| 2h  | 1.37E-07  | 2.83E-07 | 1.52E-07 | 1.64E-06 |
| 6h  | 5.07E-05  | 1.94E-05 | 2.89E-04 | 3.83E-04 |
| 12h | 1.30E-06  | 3.63E-07 | 6.17E-06 | 1.37E-05 |
| 24h | 3.73E-06  | 2.62E-06 | 1.08E-04 | 5.03E-05 |
| 36h | 1.39E-05  | 9.47E-06 | 8.44E-05 | 3.54E-05 |
| 48h | 3.94E-06  | 2.64E-06 | 2.92E-05 | 1.01E-05 |
| 72h | 1.44E-06  | 1.02E-06 | 6.82E-06 | 1.64E-06 |
|     | cgd3_3180 |          |          |          |
| 2h  | 1.40E-07  | 7.79E-08 | 2.59E-07 | 2.05E-07 |
| 6h  | 7.53E-09  | 1.61E-09 | 1.36E-07 | 3.76E-08 |
| 12h | 2.90E-06  | 1.13E-06 | 6.10E-06 | 1.39E-05 |
| 24h | 2.97E-07  | 2.10E-07 | 5.65E-07 | 4.03E-07 |
| 36h | 4.10E-07  | 3.33E-07 | 4.32E-06 | 3.12E-06 |
| 48h | 2.36E-07  | 2.13E-07 | 1.43E-06 | 9.48E-07 |

|     |           |          |          |          |
|-----|-----------|----------|----------|----------|
| 72h | 5.97E-08  | 4.49E-08 | 5.04E-07 | 1.48E-07 |
|     | cgd3_3190 |          |          |          |
| 2h  | 1.52E-06  | 2.52E-06 | 2.15E-06 | 3.19E-06 |
| 6h  | 4.56E-07  | 3.03E-07 | 1.49E-06 | 5.80E-06 |
| 12h | 3.86E-06  | 1.32E-06 | 7.61E-06 | 1.55E-05 |
| 24h | 9.23E-07  | 5.71E-07 | 2.87E-06 | 2.45E-06 |
| 36h | 6.05E-07  | 4.25E-07 | 2.97E-06 | 2.97E-06 |
| 48h | 2.81E-07  | 2.98E-07 | 1.36E-06 | 1.23E-06 |
| 72h | 4.54E-08  | 1.00E-07 | 2.03E-07 | 6.18E-08 |
|     | cgd3_3230 |          |          |          |
| 2h  | 2.43E-06  | 4.54E-05 | 1.48E-04 | 1.09E-03 |
| 6h  | 5.65E-05  | 8.47E-05 | 4.65E-05 | 6.53E-04 |
| 12h | 7.29E-06  | 1.79E-06 | 5.32E-05 | 3.49E-04 |
| 24h | 1.96E-05  | 1.83E-05 | 8.31E-05 | 8.93E-05 |
| 36h | 1.31E-05  | 2.65E-05 | 8.93E-05 | 3.02E-05 |
| 48h | 1.86E-05  | 1.47E-05 | 3.46E-05 | 6.26E-05 |
| 72h | 4.24E-06  | 8.69E-06 | 9.90E-06 | 9.98E-06 |
|     | cgd3_3290 |          |          |          |
| 2h  | 0.00E+00  | 0.00E+00 | 0.00E+00 | 0.00E+00 |
| 6h  | 0.00E+00  | 0.00E+00 | 0.00E+00 | 0.00E+00 |
| 12h | 2.00E-05  | 9.49E-06 | 5.50E-05 | 5.92E-04 |
| 24h | 1.16E-06  | 1.30E-06 | 2.75E-06 | 1.18E-05 |
| 36h | 3.65E-06  | 2.90E-06 | 4.85E-05 | 2.04E-05 |
| 48h | 7.51E-07  | 2.02E-06 | 1.43E-05 | 1.49E-05 |
| 72h | 7.15E-07  | 1.48E-06 | 3.68E-07 | 9.74E-07 |
|     | cgd3_3310 |          |          |          |
| 2h  | 0.00E+00  | 0.00E+00 | 1.54E-08 | 0.00E+00 |
| 6h  | 3.44E-09  | 0.00E+00 | 6.76E-09 | 0.00E+00 |
| 12h | 1.44E-09  | 2.45E-09 | 4.58E-09 | 5.65E-08 |
| 24h | 6.83E-10  | 3.48E-09 | 6.53E-09 | 1.58E-08 |
| 36h | 1.45E-08  | 1.02E-08 | 1.86E-08 | 5.35E-08 |
| 48h | 8.70E-09  | 1.59E-08 | 2.29E-08 | 4.19E-08 |
| 72h | 8.75E-09  | 9.77E-09 | 1.34E-08 | 1.47E-08 |
|     | cgd3_3450 |          |          |          |
| 2h  | 2.72E-07  | 0.00E+00 | 4.78E-08 | 9.85E-08 |
| 6h  | 0.00E+00  | 0.00E+00 | 0.00E+00 | 0.00E+00 |
| 12h | 0.00E+00  | 2.58E-08 | 1.53E-07 | 5.67E-08 |
| 24h | 7.94E-10  | 2.10E-08 | 1.09E-06 | 8.77E-07 |
| 36h | 1.80E-06  | 7.04E-07 | 5.42E-06 | 8.00E-07 |
| 48h | 1.61E-05  | 1.96E-05 | 4.20E-05 | 9.44E-05 |
| 72h | 1.99E-06  | 9.77E-07 | 7.05E-07 | 1.21E-06 |
|     | cgd3_3460 |          |          |          |
| 2h  | 1.68E-07  | 5.97E-07 | 2.30E-06 | 1.94E-06 |
| 6h  | 1.51E-06  | 1.30E-06 | 5.46E-06 | 1.78E-05 |
| 12h | 3.24E-07  | 2.53E-07 | 4.07E-06 | 3.51E-06 |
| 24h | 6.93E-07  | 1.53E-06 | 6.14E-06 | 9.61E-06 |
| 36h | 5.06E-07  | 3.55E-07 | 4.44E-06 | 1.91E-06 |
| 48h | 2.96E-07  | 3.68E-07 | 1.43E-06 | 3.23E-06 |
| 72h | 2.95E-07  | 1.67E-07 | 5.63E-07 | 5.78E-07 |
|     | cgd3_3490 |          |          |          |
| 2h  | 2.49E-09  | 0.00E+00 | 4.11E-08 | 1.19E-07 |
| 6h  | 2.71E-09  | 5.68E-08 | 5.54E-07 | 2.27E-07 |
| 12h | 8.35E-07  | 1.47E-06 | 3.12E-06 | 7.86E-06 |

|           |          |          |          |          |
|-----------|----------|----------|----------|----------|
| 24h       | 3.13E-08 | 1.26E-07 | 7.70E-07 | 5.87E-07 |
| 36h       | 2.35E-07 | 1.76E-07 | 1.96E-06 | 3.68E-06 |
| 48h       | 1.47E-07 | 2.50E-07 | 9.90E-07 | 1.25E-06 |
| 72h       | 5.17E-07 | 2.94E-07 | 1.35E-06 | 2.56E-06 |
| cgd3_3500 |          |          |          |          |
| 2h        | 6.46E-07 | 3.57E-07 | 2.42E-06 | 7.01E-07 |
| 6h        | 1.36E-07 | 3.51E-07 | 1.60E-07 | 0.00E+00 |
| 12h       | 1.70E-07 | 6.51E-08 | 4.55E-06 | 2.01E-06 |
| 24h       | 3.78E-07 | 8.04E-05 | 3.59E-07 | 1.29E-06 |
| 36h       | 2.63E-07 | 3.65E-07 | 1.40E-06 | 8.55E-07 |
| 48h       | 7.87E-08 | 5.97E-08 | 1.79E-07 | 3.19E-07 |
| 72h       | 1.86E-07 | 1.28E-07 | 1.84E-07 | 1.85E-07 |
| cgd3_3520 |          |          |          |          |
| 2h        | 1.25E-07 | 1.35E-07 | 4.09E-07 | 2.29E-07 |
| 6h        | 0.00E+00 | 1.04E-07 | 2.34E-07 | 8.32E-07 |
| 12h       | 3.32E-07 | 2.00E-07 | 2.56E-06 | 7.74E-07 |
| 24h       | 9.14E-08 | 8.85E-08 | 6.16E-07 | 1.20E-06 |
| 36h       | 3.10E-07 | 1.92E-07 | 1.40E-06 | 1.30E-06 |
| 48h       | 2.44E-07 | 1.52E-07 | 6.26E-07 | 1.13E-06 |
| 72h       | 4.47E-07 | 4.42E-07 | 1.65E-06 | 1.54E-06 |
| cgd3_3550 |          |          |          |          |
| 2h        | 1.43E-07 | 2.86E-07 | 4.10E-06 | 2.92E-07 |
| 6h        | 7.42E-08 | 7.73E-08 | 4.91E-07 | 4.05E-07 |
| 12h       | 6.52E-08 | 4.26E-08 | 1.21E-06 | 1.02E-06 |
| 24h       | 3.25E-08 | 1.07E-07 | 5.41E-07 | 7.17E-07 |
| 36h       | 3.26E-07 | 2.43E-07 | 1.51E-06 | 1.05E-06 |
| 48h       | 3.47E-07 | 2.50E-07 | 1.27E-06 | 1.80E-06 |
| 72h       | 5.60E-07 | 5.36E-07 | 7.09E-07 | 9.79E-07 |
| cgd3_3620 |          |          |          |          |
| 2h        | 3.19E-05 | 4.98E-06 | 1.59E-04 | 3.26E-05 |
| 6h        | 2.08E-04 | 3.51E-05 | 5.82E-04 | 9.48E-04 |
| 12h       | 3.41E-06 | 4.10E-07 | 3.84E-04 | 4.64E-04 |
| 24h       | 5.11E-05 | 1.98E-05 | 4.26E-04 | 1.22E-03 |
| 36h       | 5.41E-05 | 2.94E-05 | 3.74E-04 | 2.31E-04 |
| 48h       | 6.13E-05 | 2.04E-05 | 1.72E-04 | 3.42E-04 |
| 72h       | 1.38E-05 | 8.04E-06 | 2.74E-05 | 1.53E-05 |
| cgd3_3690 |          |          |          |          |
| 2h        | 1.41E-07 | 1.17E-07 | 1.96E-06 | 3.09E-07 |
| 6h        | 3.00E-08 | 3.97E-08 | 2.16E-07 | 1.02E-07 |
| 12h       | 7.95E-08 | 7.59E-08 | 9.45E-07 | 3.72E-07 |
| 24h       | 2.74E-08 | 5.36E-08 | 3.73E-07 | 7.86E-08 |
| 36h       | 1.65E-07 | 1.06E-07 | 4.11E-07 | 5.91E-07 |
| 48h       | 2.93E-08 | 4.71E-08 | 1.64E-07 | 1.48E-07 |
| 72h       | 5.95E-08 | 7.14E-08 | 6.11E-08 | 1.79E-07 |
| cgd3_3830 |          |          |          |          |
| 2h        | 0.00E+00 | 0.00E+00 | 0.00E+00 | 0.00E+00 |
| 6h        | 0.00E+00 | 0.00E+00 | 0.00E+00 | 4.73E-09 |
| 12h       | 2.35E-06 | 1.85E-06 | 2.99E-06 | 4.66E-06 |
| 24h       | 1.16E-07 | 7.84E-08 | 4.54E-07 | 5.54E-07 |
| 36h       | 2.18E-07 | 2.52E-07 | 9.92E-07 | 1.83E-06 |
| 48h       | 1.06E-07 | 1.86E-07 | 3.44E-07 | 4.53E-07 |
| 72h       | 6.79E-08 | 1.59E-07 | 7.48E-08 | 2.59E-07 |
| cgd3_3870 |          |          |          |          |

|     |           |          |          |          |
|-----|-----------|----------|----------|----------|
| 2h  | 1.23E-04  | 1.06E-04 | 3.45E-02 | 6.17E-05 |
| 6h  | 7.81E-05  | 4.46E-05 | 2.57E-04 | 2.87E-04 |
| 12h | 3.75E-05  | 6.84E-05 | 3.87E-04 | 7.60E-04 |
| 24h | 5.47E-05  | 1.25E-04 | 5.14E-04 | 3.39E-04 |
| 36h | 3.85E-05  | 4.16E-05 | 1.78E-04 | 2.94E-04 |
| 48h | 1.97E-05  | 2.70E-05 | 6.35E-05 | 1.23E-04 |
| 72h | 3.84E-06  | 1.50E-05 | 8.72E-06 | 2.35E-05 |
|     | cgd3_3940 |          |          |          |
| 2h  | 4.70E-07  | 1.89E-07 | 1.12E-06 | 3.14E-07 |
| 6h  | 5.85E-08  | 3.83E-08 | 3.57E-07 | 1.21E-07 |
| 12h | 9.27E-07  | 3.68E-07 | 1.83E-06 | 2.42E-06 |
| 24h | 4.55E-07  | 2.04E-07 | 5.46E-07 | 2.83E-07 |
| 36h | 3.52E-07  | 1.38E-06 | 6.94E-07 | 2.78E-07 |
| 48h | 2.13E-07  | 4.01E-07 | 3.09E-07 | 4.83E-07 |
| 72h | 1.15E-07  | 1.07E-07 | 1.06E-07 | 1.55E-07 |
|     | cgd3_4030 |          |          |          |
| 2h  | 1.60E-05  | 4.76E-05 | 9.94E-06 | 3.27E-05 |
| 6h  | 1.55E-05  | 6.81E-06 | 7.22E-06 | 1.18E-05 |
| 12h | 7.89E-06  | 1.80E-05 | 3.37E-05 | 3.49E-05 |
| 24h | 1.76E-05  | 1.04E-05 | 3.69E-05 | 4.13E-05 |
| 36h | 1.98E-05  | 1.86E-05 | 3.41E-05 | 5.08E-05 |
| 48h | 9.93E-06  | 1.54E-05 | 1.32E-05 | 3.22E-05 |
| 72h | 1.57E-05  | 1.72E-05 | 1.35E-05 | 8.89E-06 |
|     | cgd3_4040 |          |          |          |
| 2h  | 3.52E-06  | 1.84E-06 | 7.98E-06 | 5.93E-06 |
| 6h  | 1.92E-05  | 1.50E-05 | 3.82E-05 | 1.02E-04 |
| 12h | 3.56E-06  | 2.52E-06 | 3.03E-05 | 3.98E-05 |
| 24h | 1.18E-05  | 4.63E-06 | 6.06E-05 | 2.37E-05 |
| 36h | 5.24E-06  | 1.93E-06 | 2.19E-05 | 3.42E-05 |
| 48h | 4.88E-06  | 8.33E-07 | 1.48E-04 | 6.18E-06 |
| 72h | 4.63E-07  | 4.86E-07 | 2.59E-06 | 1.73E-06 |
|     | cgd3_4080 |          |          |          |
| 2h  | 1.78E-08  | 9.64E-09 | 1.93E-07 | 1.68E-07 |
| 6h  | 4.10E-07  | 8.38E-07 | 6.00E-06 | 7.86E-06 |
| 12h | 1.60E-07  | 1.46E-07 | 1.66E-06 | 2.74E-06 |
| 24h | 2.36E-07  | 1.67E-07 | 3.46E-06 | 3.74E-06 |
| 36h | 6.19E-08  | 5.37E-08 | 8.90E-07 | 2.32E-06 |
| 48h | 1.19E-07  | 2.64E-08 | 8.34E-07 | 2.14E-07 |
| 72h | 3.71E-08  | 1.91E-08 | 1.80E-07 | 4.97E-08 |
|     | cgd3_4120 |          |          |          |
| 2h  | 5.25E-09  | 2.32E-08 | 2.79E-08 | 0.00E+00 |
| 6h  | 8.85E-09  | 3.62E-08 | 3.50E-08 | 1.25E-07 |
| 12h | 1.38E-09  | 9.51E-10 | 1.46E-08 | 2.76E-08 |
| 24h | 9.27E-09  | 6.10E-09 | 9.48E-08 | 1.06E-07 |
| 36h | 4.09E-08  | 2.20E-08 | 6.02E-08 | 2.14E-07 |
| 48h | 3.97E-08  | 9.40E-09 | 1.60E-07 | 5.58E-07 |
| 72h | 2.02E-08  | 3.06E-08 | 5.81E-08 | 9.12E-08 |
|     | cgd3_4130 |          |          |          |
| 2h  | 0.00E+00  | 3.71E-08 | 0.00E+00 | 0.00E+00 |
| 6h  | 2.53E-07  | 7.91E-07 | 2.14E-06 | 1.95E-06 |
| 12h | 1.18E-06  | 5.44E-07 | 1.19E-05 | 8.10E-06 |
| 24h | 1.08E-06  | 5.65E-07 | 4.74E-06 | 1.02E-05 |
| 36h | 8.95E-06  | 3.58E-06 | 3.61E-05 | 4.35E-05 |



|     |           |          |          |          |
|-----|-----------|----------|----------|----------|
| 48h | 7.36E-06  | 6.65E-07 | 1.93E-05 | 5.92E-06 |
| 72h | 3.92E-06  | 6.58E-07 | 1.07E-05 | 1.04E-06 |
|     | cgd3_4140 |          |          |          |
| 2h  | 3.07E-05  | 2.15E-05 | 7.73E-05 | 1.29E-04 |
| 6h  | 6.09E-05  | 2.11E-05 | 2.06E-04 | 3.70E-04 |
| 12h | 2.11E-06  | 1.57E-06 | 8.06E-05 | 2.73E-04 |
| 24h | 1.78E-05  | 4.80E-06 | 4.77E-05 | 7.33E-05 |
| 36h | 1.43E-05  | 1.50E-05 | 7.69E-05 | 1.20E-04 |
| 48h | 7.84E-06  | 2.06E-06 | 3.10E-05 | 1.12E-05 |
| 72h | 3.00E-06  | 1.93E-06 | 9.00E-06 | 4.77E-06 |
|     | cgd3_4150 |          |          |          |
| 2h  | 3.35E-05  | 6.09E-05 | 7.46E-05 | 2.36E-04 |
| 6h  | 1.67E-05  | 3.81E-06 | 4.06E-05 | 2.50E-05 |
| 12h | 1.37E-05  | 1.88E-05 | 1.92E-03 | 3.32E-04 |
| 24h | 2.20E-05  | 2.68E-03 | 4.33E-05 | 4.18E-05 |
| 36h | 9.90E-06  | 8.47E-06 | 5.91E-05 | 8.70E-05 |
| 48h | 3.19E-06  | 2.61E-06 | 2.60E-05 | 2.05E-05 |
| 72h | 5.03E-06  | 2.03E-06 | 1.62E-05 | 4.23E-06 |
|     | cgd3_4190 |          |          |          |
| 2h  | 1.68E-06  | 3.25E-06 | 1.58E-06 | 9.45E-06 |
| 6h  | 1.48E-06  | 3.47E-07 | 3.04E-06 | 2.15E-06 |
| 12h | 8.82E-07  | 1.15E-06 | 3.53E-06 | 2.53E-05 |
| 24h | 1.90E-06  | 7.61E-07 | 1.17E-06 | 6.03E-06 |
| 36h | 1.16E-06  | 1.06E-06 | 2.98E-06 | 8.46E-06 |
| 48h | 4.00E-07  | 3.92E-07 | 1.54E-06 | 1.58E-06 |
| 72h | 8.01E-07  | 1.50E-07 | 1.23E-06 | 1.43E-07 |
|     | cgd3_4210 |          |          |          |
| 2h  | 7.89E-07  | 1.65E-06 | 6.86E-07 | 3.51E-06 |
| 6h  | 5.64E-06  | 3.98E-06 | 7.56E-05 | 1.66E-05 |
| 12h | 1.24E-06  | 4.38E-07 | 5.58E-06 | 7.08E-06 |
| 24h | 2.80E-06  | 6.26E-07 | 7.88E-06 | 1.95E-05 |
| 36h | 3.33E-06  | 1.24E-06 | 1.83E-05 | 1.30E-05 |
| 48h | 1.26E-06  | 1.37E-06 | 7.75E-06 | 4.78E-06 |
| 72h | 5.02E-07  | 3.79E-07 | 1.01E-06 | 9.33E-08 |
|     | cgd3_4230 |          |          |          |
| 2h  | 2.81E-08  | 2.81E-08 | 3.20E-08 | 2.94E-08 |
| 6h  | 2.85E-09  | 3.61E-09 | 1.88E-09 | 2.64E-09 |
| 12h | 6.76E-10  | 2.98E-10 | 2.45E-09 | 0.00E+00 |
| 24h | 4.93E-10  | 7.40E-10 | 5.23E-09 | 5.00E-09 |
| 36h | 2.27E-10  | 9.56E-09 | 4.45E-08 | 7.60E-08 |
| 48h | 1.56E-07  | 2.17E-07 | 4.54E-07 | 7.27E-07 |
| 72h | 9.81E-08  | 1.76E-08 | 5.00E-07 | 4.02E-08 |
|     | cgd3_4240 |          |          |          |
| 2h  | 9.59E-08  | 7.48E-08 | 0.00E+00 | 2.43E-07 |
| 6h  | 3.58E-09  | 7.38E-09 | 3.25E-08 | 0.00E+00 |
| 12h | 2.26E-08  | 1.46E-08 | 3.48E-07 | 3.67E-07 |
| 24h | 2.15E-08  | 3.77E-08 | 2.23E-08 | 4.58E-07 |
| 36h | 3.56E-08  | 8.78E-09 | 2.47E-07 | 8.08E-08 |
| 48h | 2.45E-08  | 2.25E-08 | 7.47E-08 | 5.51E-08 |
| 72h | 1.04E-08  | 5.02E-09 | 6.74E-08 | 5.67E-09 |
|     | cgd3_4260 |          |          |          |
| 2h  | 1.87E-04  | 1.75E-04 | 5.33E-03 | 5.71E-04 |
| 6h  | 1.05E-04  | 9.21E-05 | 5.09E-04 | 4.19E-04 |

|     |           |          |          |          |
|-----|-----------|----------|----------|----------|
| 12h | 1.60E-04  | 6.08E-05 | 6.98E-04 | 7.84E-04 |
| 24h | 9.61E-05  | 5.96E-05 | 1.92E-04 | 2.93E-04 |
| 36h | 1.26E-04  | 4.56E-05 | 1.10E-03 | 2.56E-04 |
| 48h | 1.17E-04  | 5.66E-05 | 3.27E-04 | 1.59E-04 |
| 72h | 2.42E-05  | 8.04E-06 | 9.12E-05 | 1.41E-05 |
|     | cgd4_400  |          |          |          |
| 2h  | 0.00E+00  | 0.00E+00 | 0.00E+00 | 0.00E+00 |
| 6h  | 0.00E+00  | 0.00E+00 | 6.28E-09 | 0.00E+00 |
| 12h | 6.69E-09  | 0.00E+00 | 8.07E-09 | 7.21E-09 |
| 24h | 1.25E-09  | 2.24E-09 | 4.60E-09 | 2.75E-08 |
| 36h | 5.68E-08  | 3.57E-08 | 7.40E-08 | 7.95E-08 |
| 48h | 1.56E-07  | 9.88E-08 | 6.24E-07 | 3.68E-07 |
| 72h | 6.83E-08  | 3.43E-08 | 7.15E-07 | 5.33E-08 |
|     | cgd4_800  |          |          |          |
| 2h  | 0.00E+00  | 0.00E+00 | 0.00E+00 | 0.00E+00 |
| 6h  | 0.00E+00  | 2.87E-08 | 5.30E-08 | 3.20E-07 |
| 12h | 3.75E-08  | 2.95E-08 | 1.31E-07 | 2.56E-07 |
| 24h | 1.44E-08  | 8.45E-09 | 1.29E-07 | 2.06E-07 |
| 36h | 1.71E-08  | 2.35E-08 | 4.60E-08 | 2.31E-07 |
| 48h | 2.93E-08  | 3.94E-08 | 1.09E-07 | 1.04E-07 |
| 72h | 1.52E-08  | 1.06E-08 | 3.20E-08 | 1.65E-08 |
|     | cgd4_870  |          |          |          |
| 2h  | 0.00E+00  | 0.00E+00 | 0.00E+00 | 6.58E-08 |
| 6h  | 1.31E-08  | 2.80E-09 | 3.82E-08 | 0.00E+00 |
| 12h | 6.00E-07  | 1.19E-07 | 7.57E-07 | 2.03E-06 |
| 24h | 3.29E-07  | 2.17E-07 | 4.40E-07 | 4.74E-07 |
| 36h | 2.38E-07  | 7.77E-07 | 2.79E-06 | 2.58E-06 |
| 48h | 1.51E-07  | 5.64E-07 | 4.29E-07 | 1.64E-06 |
| 72h | 9.25E-08  | 6.79E-07 | 4.03E-07 | 1.97E-07 |
|     | cgd4_970  |          |          |          |
| 2h  | 0.00E+00  | 0.00E+00 | 0.00E+00 | 0.00E+00 |
| 6h  | 1.61E-08  | 3.21E-08 | 6.50E-07 | 3.02E-06 |
| 12h | 1.40E-07  | 7.98E-08 | 1.18E-06 | 3.61E-06 |
| 24h | 2.15E-07  | 7.46E-07 | 4.36E-06 | 7.46E-06 |
| 36h | 3.95E-07  | 2.95E-07 | 1.82E-06 | 3.64E-06 |
| 48h | 8.19E-08  | 3.53E-07 | 4.90E-07 | 4.03E-07 |
| 72h | 7.06E-08  | 1.15E-07 | 1.25E-07 | 6.99E-07 |
|     | cgd3_2640 |          |          |          |
| 2h  | 1.97E-04  | 8.22E-05 | 6.28E-05 | 5.75E-04 |
| 6h  | 3.41E-05  | 9.17E-05 | 1.24E-04 | 1.81E-04 |
| 12h | 4.08E-05  | 8.73E-05 | 1.08E-03 | 1.62E-03 |
| 24h | 9.50E-05  | 1.97E-04 | 1.34E-04 | 2.95E-04 |
| 36h | 4.17E-05  | 8.54E-05 | 1.43E-04 | 3.23E-04 |
| 48h | 2.40E-05  | 8.74E-05 | 1.42E-04 | 1.13E-04 |
| 72h | 7.75E-06  | 5.03E-05 | 3.39E-05 | 2.30E-05 |
|     | cgd3_2740 |          |          |          |
| 2h  | 5.50E-08  | 2.19E-08 | 2.68E-08 | 0.00E+00 |
| 6h  | 4.18E-08  | 3.56E-08 | 5.79E-08 | 3.31E-07 |
| 12h | 4.41E-08  | 3.70E-08 | 4.27E-07 | 7.19E-07 |
| 24h | 1.68E-08  | 1.84E-08 | 5.06E-08 | 2.34E-07 |
| 36h | 1.03E-07  | 5.00E-08 | 7.98E-07 | 6.58E-07 |
| 48h | 2.38E-08  | 5.74E-08 | 1.54E-07 | 1.35E-07 |
| 72h | 2.94E-08  | 7.15E-08 | 1.07E-07 | 6.33E-08 |

|     |           |          |          |          |
|-----|-----------|----------|----------|----------|
|     | cgd3_2750 |          |          |          |
| 2h  | 6.10E-08  | 4.88E-09 | 4.43E-09 | 0.00E+00 |
| 6h  | 2.34E-08  | 1.61E-08 | 0.00E+00 | 2.55E-08 |
| 12h | 1.02E-09  | 5.60E-09 | 8.79E-09 | 4.20E-08 |
| 24h | 2.51E-09  | 3.90E-09 | 3.07E-09 | 3.82E-09 |
| 36h | 5.75E-09  | 1.24E-08 | 7.85E-08 | 1.96E-08 |
| 48h | 2.94E-09  | 4.69E-09 | 2.11E-08 | 3.70E-08 |
| 72h | 2.43E-08  | 3.40E-08 | 3.52E-08 | 2.25E-08 |
|     | cgd3_2870 |          |          |          |
| 2h  | 2.70E-07  | 1.66E-08 | 7.29E-08 | 9.77E-07 |
| 6h  | 5.15E-08  | 1.02E-07 | 2.14E-07 | 4.15E-07 |
| 12h | 2.42E-08  | 2.19E-08 | 2.88E-07 | 4.80E-07 |
| 24h | 1.76E-08  | 3.12E-08 | 1.84E-07 | 4.97E-07 |
| 36h | 3.70E-08  | 8.68E-08 | 3.41E-07 | 3.46E-07 |
| 48h | 1.32E-07  | 2.90E-07 | 6.97E-07 | 4.45E-07 |
| 72h | 2.42E-08  | 2.87E-08 | 5.06E-08 | 8.31E-08 |
|     | cgd3_2920 |          |          |          |
| 2h  | 5.93E-07  | 3.87E-07 | 1.44E-08 | 5.00E-07 |
| 6h  | 3.58E-07  | 1.44E-06 | 1.69E-06 | 8.81E-06 |
| 12h | 2.77E-08  | 7.06E-08 | 3.34E-07 | 1.68E-06 |
| 24h | 1.25E-08  | 1.09E-07 | 8.28E-07 | 3.60E-06 |
| 36h | 3.96E-07  | 2.99E-07 | 7.10E-07 | 2.02E-06 |
| 48h | 1.79E-07  | 7.47E-07 | 4.10E-07 | 7.03E-07 |
| 72h | 4.91E-08  | 3.20E-07 | 5.27E-07 | 7.24E-07 |
|     | cgd3_2950 |          |          |          |
| 2h  | 2.82E-06  | 6.61E-07 | 7.62E-07 | 5.11E-06 |
| 6h  | 2.06E-07  | 8.31E-07 | 8.82E-07 | 1.74E-06 |
| 12h | 5.27E-07  | 6.10E-07 | 3.40E-06 | 1.17E-05 |
| 24h | 2.99E-07  | 3.16E-07 | 2.57E-06 | 3.29E-06 |
| 36h | 4.78E-07  | 4.42E-07 | 9.84E-07 | 2.53E-06 |
| 48h | 2.01E-07  | 3.25E-07 | 7.97E-07 | 1.59E-06 |
| 72h | 4.68E-08  | 1.82E-07 | 1.46E-07 | 1.40E-07 |
|     | cgd3_2960 |          |          |          |
| 2h  | 0.00E+00  | 0.00E+00 | 0.00E+00 | 0.00E+00 |
| 6h  | 1.73E-09  | 0.00E+00 | 1.39E-08 | 0.00E+00 |
| 12h | 5.93E-09  | 2.36E-09 | 4.49E-08 | 9.50E-08 |
| 24h | 6.44E-09  | 8.44E-09 | 1.18E-07 | 1.84E-07 |
| 36h | 5.42E-08  | 6.10E-08 | 1.16E-07 | 3.53E-07 |
| 48h | 1.29E-07  | 1.17E-07 | 1.57E-07 | 3.83E-07 |
| 72h | 1.60E-09  | 8.69E-08 | 8.42E-09 | 9.96E-09 |
|     | cgd3_2970 |          |          |          |
| 2h  | 1.06E-07  | 0.00E+00 | 0.00E+00 | 1.82E-08 |
| 6h  | 2.63E-08  | 0.00E+00 | 2.21E-09 | 1.87E-08 |
| 12h | 0.00E+00  | 0.00E+00 | 2.64E-08 | 9.43E-09 |
| 24h | 8.57E-09  | 2.71E-08 | 4.86E-08 | 1.30E-07 |
| 36h | 1.23E-07  | 1.85E-07 | 4.62E-07 | 3.93E-07 |
| 48h | 7.09E-07  | 1.54E-06 | 1.30E-06 | 2.16E-06 |
| 72h | 5.39E-08  | 8.79E-07 | 8.28E-08 | 8.52E-08 |
|     | cgd3_3050 |          |          |          |
| 2h  | 3.03E-08  | 2.90E-09 | 7.50E-08 | 6.90E-08 |
| 6h  | 4.37E-08  | 3.00E-08 | 7.62E-08 | 1.41E-07 |
| 12h | 1.67E-07  | 6.82E-08 | 2.45E-07 | 3.59E-07 |
| 24h | 7.76E-08  | 6.22E-08 | 1.76E-07 | 4.71E-07 |

|     |           |          |          |          |
|-----|-----------|----------|----------|----------|
| 36h | 6.64E-08  | 1.68E-07 | 4.93E-07 | 6.14E-07 |
| 48h | 2.70E-07  | 1.05E-06 | 7.24E-07 | 1.13E-06 |
| 72h | 1.80E-08  | 1.35E-07 | 8.79E-08 | 6.89E-08 |
|     | cgd4_380  |          |          |          |
| 2h  | 0.00E+00  | 7.20E-07 | 1.63E-06 | 7.37E-07 |
| 6h  | 1.68E-06  | 2.56E-06 | 5.85E-07 | 1.98E-06 |
| 12h | 2.73E-07  | 3.49E-07 | 1.70E-06 | 8.85E-07 |
| 24h | 1.87E-06  | 6.09E-07 | 2.20E-06 | 8.51E-07 |
| 36h | 1.94E-07  | 1.50E-07 | 8.59E-07 | 6.29E-07 |
| 48h | 2.57E-07  | 1.64E-07 | 4.79E-07 | 1.95E-07 |
| 72h | 4.87E-08  | 3.66E-08 | 2.80E-07 | 1.07E-07 |
|     | cgd4_350  |          |          |          |
| 2h  | 3.39E-08  | 5.64E-08 | 9.11E-08 | 1.04E-08 |
| 6h  | 7.92E-08  | 1.64E-07 | 1.39E-07 | 3.99E-08 |
| 12h | 2.67E-09  | 4.57E-09 | 1.10E-07 | 2.06E-07 |
| 24h | 1.35E-07  | 2.39E-08 | 7.21E-07 | 5.47E-07 |
| 36h | 6.51E-08  | 6.10E-08 | 8.11E-07 | 4.84E-07 |
| 48h | 8.63E-08  | 4.51E-08 | 1.50E-07 | 1.51E-07 |
| 72h | 2.29E-08  | 5.09E-08 | 1.08E-07 | 3.78E-08 |
|     | cgd4_430  |          |          |          |
| 2h  | 7.82E-08  | 4.60E-07 | 2.04E-07 | 1.09E-06 |
| 6h  | 2.96E-05  | 2.99E-05 | 1.96E-04 | 4.56E-04 |
| 12h | 1.77E-06  | 1.03E-06 | 4.38E-05 | 5.59E-05 |
| 24h | 6.91E-06  | 5.23E-06 | 2.42E-04 | 2.94E-04 |
| 36h | 7.57E-06  | 1.23E-05 | 2.69E-04 | 9.78E-05 |
| 48h | 2.82E-06  | 3.00E-06 | 1.77E-04 | 3.14E-04 |
| 72h | 7.38E-06  | 9.31E-06 | 4.70E-05 | 2.09E-05 |
|     | cgd4_1320 |          |          |          |
| 2h  | 0.00E+00  | 7.23E-09 | 0.00E+00 | 1.42E-07 |
| 6h  | 1.72E-08  | 2.58E-09 | 0.00E+00 | 3.65E-08 |
| 12h | 1.76E-08  | 1.69E-08 | 4.56E-08 | 2.65E-07 |
| 24h | 3.00E-08  | 4.26E-09 | 2.26E-07 | 5.14E-08 |
| 36h | 1.71E-08  | 3.48E-08 | 3.76E-07 | 2.51E-07 |
| 48h | 7.83E-08  | 2.98E-08 | 2.52E-07 | 1.84E-07 |
| 72h | 1.24E-07  | 1.83E-07 | 1.13E-06 | 4.80E-07 |
|     | cgd4_1330 |          |          |          |
| 2h  | 3.13E-08  | 4.39E-08 | 2.87E-07 | 4.36E-08 |
| 6h  | 1.69E-07  | 3.67E-08 | 5.79E-08 | 3.16E-06 |
| 12h | 9.84E-09  | 2.75E-08 | 2.35E-07 | 2.98E-07 |
| 24h | 1.71E-07  | 2.47E-08 | 1.93E-06 | 5.04E-07 |
| 36h | 6.56E-08  | 1.36E-07 | 8.38E-07 | 6.34E-07 |
| 48h | 1.41E-07  | 9.76E-08 | 6.46E-07 | 1.03E-06 |
| 72h | 1.39E-07  | 1.85E-07 | 9.38E-07 | 5.52E-07 |
|     | cgd4_1340 |          |          |          |
| 2h  | 7.02E-08  | 2.99E-07 | 1.21E-06 | 5.94E-08 |
| 6h  | 1.95E-07  | 6.98E-08 | 1.64E-07 | 6.47E-07 |
| 12h | 2.12E-08  | 6.75E-09 | 3.10E-07 | 8.63E-07 |
| 24h | 6.77E-08  | 2.31E-08 | 8.75E-07 | 1.13E-06 |
| 36h | 8.45E-08  | 2.14E-07 | 1.96E-06 | 1.34E-06 |
| 48h | 3.58E-08  | 8.67E-08 | 1.52E-06 | 1.04E-06 |
| 72h | 5.80E-08  | 6.35E-08 | 1.85E-07 | 3.80E-08 |
|     | cgd4_1350 |          |          |          |
| 2h  | 4.75E-08  | 1.15E-07 | 2.37E-06 | 1.74E-07 |

|     |           |          |          |          |
|-----|-----------|----------|----------|----------|
| 6h  | 6.11E-07  | 4.04E-07 | 1.56E-06 | 3.50E-06 |
| 12h | 1.20E-07  | 7.29E-07 | 1.87E-06 | 4.70E-06 |
| 24h | 6.58E-08  | 6.73E-08 | 2.14E-06 | 2.98E-06 |
| 36h | 2.95E-07  | 5.95E-07 | 4.05E-06 | 2.84E-06 |
| 48h | 5.85E-08  | 2.25E-07 | 2.73E-06 | 1.04E-06 |
| 72h | 6.59E-08  | 4.82E-08 | 1.19E-07 | 8.59E-08 |
|     | cgd4_1370 |          |          |          |
| 2h  | 8.48E-07  | 2.81E-06 | 1.33E-05 | 7.66E-06 |
| 6h  | 1.47E-06  | 1.17E-06 | 5.91E-06 | 4.32E-06 |
| 12h | 1.25E-07  | 1.16E-07 | 2.41E-06 | 8.09E-06 |
| 24h | 9.82E-07  | 5.13E-07 | 6.22E-06 | 3.75E-06 |
| 36h | 3.47E-07  | 7.03E-07 | 2.59E-05 | 2.95E-06 |
| 48h | 1.46E-07  | 3.23E-07 | 2.74E-06 | 1.88E-06 |
| 72h | 4.15E-07  | 1.74E-07 | 1.20E-06 | 1.59E-07 |
|     | cgd4_1380 |          |          |          |
| 2h  | 1.02E-05  | 2.11E-05 | 9.60E-05 | 1.18E-05 |
| 6h  | 1.19E-05  | 1.29E-05 | 2.30E-05 | 1.35E-04 |
| 12h | 5.45E-07  | 2.54E-09 | 8.24E-05 | 8.48E-05 |
| 24h | 6.29E-06  | 4.82E-06 | 5.85E-05 | 6.63E-05 |
| 36h | 4.47E-06  | 6.79E-06 | 1.76E-04 | 2.18E-05 |
| 48h | 2.96E-06  | 2.48E-06 | 2.01E-05 | 1.46E-05 |
| 72h | 5.07E-07  | 1.86E-06 | 1.80E-06 | 2.06E-06 |
|     | cgd4_1390 |          |          |          |
| 2h  | 3.62E-09  | 3.80E-09 | 1.22E-08 | 7.19E-08 |
| 6h  | 2.62E-07  | 5.15E-07 | 1.35E-06 | 2.37E-06 |
| 12h | 1.00E-08  | 4.34E-09 | 3.11E-08 | 7.95E-08 |
| 24h | 4.29E-08  | 7.03E-08 | 2.25E-06 | 2.52E-06 |
| 36h | 9.00E-08  | 1.16E-07 | 5.25E-07 | 4.12E-07 |
| 48h | 6.84E-08  | 9.18E-08 | 3.83E-07 | 4.68E-07 |
| 72h | 3.61E-09  | 1.47E-09 | 6.57E-09 | 3.25E-09 |
|     | cgd4_1400 |          |          |          |
| 2h  | 4.83E-07  | 3.21E-06 | 2.99E-06 | 8.05E-06 |
| 6h  | 7.38E-07  | 1.00E-06 | 5.62E-06 | 1.44E-05 |
| 12h | 2.97E-07  | 2.48E-07 | 1.79E-06 | 3.97E-06 |
| 24h | 5.87E-07  | 3.96E-07 | 4.92E-06 | 5.28E-06 |
| 36h | 8.29E-07  | 6.74E-07 | 2.55E-06 | 1.94E-06 |
| 48h | 2.49E-07  | 5.23E-07 | 1.44E-06 | 2.52E-06 |
| 72h | 1.78E-07  | 4.89E-08 | 2.73E-07 | 1.27E-07 |
|     | cgd4_1420 |          |          |          |
| 2h  | 2.17E-07  | 9.94E-07 | 1.25E-06 | 3.17E-06 |
| 6h  | 1.43E-07  | 6.11E-07 | 1.07E-06 | 3.13E-06 |
| 12h | 3.11E-07  | 9.88E-08 | 7.14E-07 | 1.34E-06 |
| 24h | 1.48E-07  | 2.10E-07 | 2.34E-06 | 1.25E-06 |
| 36h | 3.43E-07  | 1.52E-07 | 5.37E-07 | 3.71E-07 |
| 48h | 1.04E-07  | 1.30E-07 | 6.32E-07 | 2.98E-07 |
| 72h | 7.09E-08  | 5.59E-08 | 1.84E-07 | 6.24E-08 |
|     | cgd4_1430 |          |          |          |
| 2h  | 6.12E-08  | 1.85E-07 | 1.22E-07 | 4.29E-07 |
| 6h  | 3.17E-07  | 3.51E-07 | 1.09E-06 | 1.10E-06 |
| 12h | 2.19E-09  | 5.96E-09 | 1.84E-07 | 3.77E-07 |
| 24h | 8.08E-08  | 6.64E-08 | 3.27E-07 | 7.42E-07 |
| 36h | 6.54E-08  | 1.23E-07 | 2.78E-07 | 8.04E-08 |
| 48h | 1.03E-07  | 3.28E-08 | 3.46E-07 | 4.49E-07 |

|     |           |          |          |          |
|-----|-----------|----------|----------|----------|
| 72h | 2.25E-08  | 5.58E-08 | 1.13E-07 | 2.22E-08 |
|     | cgd4_1440 |          |          |          |
| 2h  | 4.80E-07  | 5.38E-07 | 2.20E-06 | 2.13E-06 |
| 6h  | 1.56E-06  | 2.80E-06 | 5.25E-06 | 1.12E-05 |
| 12h | 1.42E-08  | 4.05E-09 | 5.99E-07 | 3.60E-06 |
| 24h | 5.06E-07  | 7.18E-07 | 1.41E-05 | 9.87E-06 |
| 36h | 1.04E-06  | 1.20E-06 | 6.63E-06 | 5.33E-06 |
| 48h | 1.09E-06  | 5.58E-07 | 8.58E-06 | 1.16E-05 |
| 72h | 5.84E-07  | 6.74E-07 | 1.00E-05 | 1.02E-06 |
|     | cgd4_1450 |          |          |          |
| 2h  | 4.32E-09  | 0.00E+00 | 0.00E+00 | 2.03E-08 |
| 6h  | 1.54E-08  | 0.00E+00 | 9.39E-09 | 0.00E+00 |
| 12h | 1.27E-09  | 7.77E-10 | 0.00E+00 | 3.75E-09 |
| 24h | 2.25E-09  | 6.24E-10 | 5.90E-09 | 9.05E-09 |
| 36h | 1.37E-08  | 1.61E-08 | 2.65E-08 | 2.53E-08 |
| 48h | 3.80E-08  | 2.73E-08 | 9.00E-08 | 1.43E-07 |
| 72h | 3.45E-08  | 2.33E-08 | 1.93E-07 | 8.56E-08 |
|     | cgd4_1470 |          |          |          |
| 2h  | 6.61E-07  | 2.99E-06 | 5.14E-06 | 2.44E-06 |
| 6h  | 2.48E-06  | 1.01E-06 | 5.62E-06 | 6.37E-06 |
| 12h | 1.80E-07  | 4.19E-07 | 1.42E-05 | 1.30E-05 |
| 24h | 2.10E-06  | 1.09E-06 | 2.83E-06 | 3.80E-06 |
| 36h | 9.53E-07  | 1.53E-06 | 9.33E-06 | 5.97E-06 |
| 48h | 4.80E-07  | 3.51E-07 | 2.00E-06 | 8.65E-07 |
| 72h | 1.01E-06  | 5.05E-07 | 2.43E-06 | 8.44E-07 |
|     | cgd4_1480 |          |          |          |
| 2h  | 3.46E-04  | 1.97E-03 | 6.44E-03 | 2.11E-02 |
| 6h  | 2.83E-04  | 2.89E-04 | 1.67E-03 | 5.44E-03 |
| 12h | 2.10E-04  | 2.29E-04 | 9.50E-03 | 2.69E-02 |
| 24h | 4.94E-04  | 1.02E-03 | 6.40E-03 | 6.44E-03 |
| 36h | 2.05E-04  | 3.25E-04 | 7.03E-03 | 7.19E-03 |
| 48h | 3.72E-04  | 1.99E-04 | 2.32E-03 | 4.57E-03 |
| 72h | 4.15E-05  | 6.51E-05 | 6.02E-04 | 5.36E-05 |
|     | cgd4_1500 |          |          |          |
| 2h  | 1.40E-06  | 1.66E-05 | 1.28E-03 | 1.42E-04 |
| 6h  | 1.66E-05  | 3.07E-05 | 1.94E-03 | 1.31E-02 |
| 12h | 3.11E-07  | 2.46E-06 | 1.83E-04 | 3.91E-04 |
| 24h | 8.08E-06  | 2.76E-05 | 3.13E-04 | 4.93E-04 |
| 36h | 7.20E-05  | 4.61E-05 | 4.86E-04 | 6.91E-04 |
| 48h | 5.00E-05  | 5.66E-05 | 1.00E-03 | 1.05E-03 |
| 72h | 1.83E-05  | 1.84E-05 | 5.77E-05 | 4.84E-05 |
|     | cgd4_1580 |          |          |          |
| 2h  | 8.41E-06  | 1.94E-05 | 1.47E-04 | 1.60E-04 |
| 6h  | 1.05E-06  | 3.99E-06 | 3.76E-05 | 3.30E-05 |
| 12h | 3.45E-06  | 4.14E-06 | 3.63E-04 | 2.02E-04 |
| 24h | 9.11E-06  | 1.33E-05 | 5.53E-05 | 3.25E-05 |
| 36h | 6.20E-06  | 5.79E-06 | 5.68E-05 | 3.95E-05 |
| 48h | 2.03E-06  | 2.59E-06 | 2.88E-05 | 2.33E-05 |
| 72h | 1.31E-06  | 7.17E-07 | 1.23E-05 | 1.54E-06 |
|     | cgd4_1600 |          |          |          |
| 2h  | 0.00E+00  | 1.00E-08 | 2.30E-08 | 0.00E+00 |
| 6h  | 0.00E+00  | 1.29E-09 | 0.00E+00 | 0.00E+00 |
| 12h | 2.44E-08  | 2.56E-08 | 3.66E-07 | 1.08E-06 |

|           |          |          |          |          |
|-----------|----------|----------|----------|----------|
| 24h       | 1.75E-08 | 7.95E-08 | 1.88E-07 | 2.87E-07 |
| 36h       | 0.00E+00 | 1.86E-07 | 2.27E-05 | 2.25E-06 |
| 48h       | 1.54E-07 | 4.46E-07 | 1.01E-06 | 1.21E-06 |
| 72h       | 1.36E-07 | 2.85E-08 | 2.12E-07 | 2.35E-07 |
| cgd4_1610 |          |          |          |          |
| 2h        | 0.00E+00 | 2.23E-09 | 2.19E-08 | 0.00E+00 |
| 6h        | 0.00E+00 | 0.00E+00 | 0.00E+00 | 0.00E+00 |
| 12h       | 3.62E-09 | 3.62E-09 | 4.59E-08 | 7.25E-08 |
| 24h       | 3.87E-09 | 1.64E-08 | 3.45E-08 | 5.91E-08 |
| 36h       | 7.47E-08 | 2.73E-08 | 2.19E-07 | 3.31E-07 |
| 48h       | 5.54E-08 | 9.25E-08 | 5.19E-07 | 5.23E-07 |
| 72h       | 8.13E-08 | 1.29E-08 | 9.07E-08 | 1.01E-07 |
| cgd4_1620 |          |          |          |          |
| 2h        | 1.91E-05 | 2.80E-05 | 6.33E-06 | 1.24E-04 |
| 6h        | 0.00E+00 | 1.33E-07 | 0.00E+00 | 0.00E+00 |
| 12h       | 0.00E+00 | 0.00E+00 | 2.89E-06 | 3.79E-05 |
| 24h       | 1.26E-07 | 3.17E-07 | 1.62E-05 | 6.74E-06 |
| 36h       | 1.49E-06 | 2.04E-06 | 9.38E-06 | 2.67E-06 |
| 48h       | 7.92E-05 | 3.39E-05 | 1.81E-04 | 3.07E-04 |
| 72h       | 3.44E-06 | 2.06E-05 | 3.01E-05 | 7.09E-05 |
| cgd4_1680 |          |          |          |          |
| 2h        | 7.04E-08 | 1.95E-08 | 4.50E-08 | 2.76E-07 |
| 6h        | 3.72E-08 | 1.45E-07 | 2.21E-07 | 4.55E-07 |
| 12h       | 1.31E-08 | 1.48E-08 | 2.71E-07 | 4.11E-07 |
| 24h       | 3.92E-08 | 1.93E-08 | 1.45E-07 | 2.20E-07 |
| 36h       | 1.01E-07 | 3.45E-08 | 3.16E-07 | 2.28E-07 |
| 48h       | 1.09E-07 | 6.07E-08 | 1.33E-07 | 5.13E-07 |
| 72h       | 5.06E-08 | 5.27E-09 | 1.86E-08 | 8.77E-09 |
| cgd4_1690 |          |          |          |          |
| 2h        | 0.00E+00 | 0.00E+00 | 0.00E+00 | 0.00E+00 |
| 6h        | 0.00E+00 | 0.00E+00 | 0.00E+00 | 0.00E+00 |
| 12h       | 9.94E-08 | 1.07E-06 | 9.08E-06 | 2.63E-05 |
| 24h       | 6.75E-07 | 9.20E-07 | 6.07E-06 | 1.31E-05 |
| 36h       | 9.44E-06 | 3.75E-06 | 4.06E-05 | 1.50E-05 |
| 48h       | 3.38E-06 | 1.61E-06 | 1.15E-05 | 3.15E-05 |
| 72h       | 4.59E-06 | 8.51E-06 | 7.01E-06 | 4.33E-06 |
| cgd4_1720 |          |          |          |          |
| 2h        | 5.83E-07 | 2.53E-07 | 0.00E+00 | 3.22E-06 |
| 6h        | 1.44E-06 | 1.98E-06 | 1.84E-05 | 1.19E-05 |
| 12h       | 1.57E-07 | 3.50E-08 | 3.77E-06 | 4.54E-06 |
| 24h       | 1.41E-06 | 7.05E-07 | 2.75E-05 | 1.12E-05 |
| 36h       | 4.67E-07 | 2.97E-07 | 6.24E-06 | 3.52E-06 |
| 48h       | 1.02E-06 | 3.07E-07 | 1.00E-05 | 2.68E-06 |
| 72h       | 1.31E-07 | 2.23E-07 | 3.10E-06 | 1.08E-06 |
| cgd4_1730 |          |          |          |          |
| 2h        | 2.51E-08 | 2.64E-08 | 8.78E-09 | 0.00E+00 |
| 6h        | 2.62E-07 | 2.93E-07 | 1.01E-06 | 7.04E-07 |
| 12h       | 8.08E-10 | 2.31E-09 | 7.74E-08 | 2.72E-07 |
| 24h       | 4.54E-08 | 3.07E-08 | 1.09E-06 | 4.31E-07 |
| 36h       | 8.10E-08 | 4.55E-08 | 2.08E-07 | 2.00E-07 |
| 48h       | 7.74E-08 | 8.55E-08 | 3.28E-07 | 1.34E-07 |
| 72h       | 3.61E-08 | 8.80E-08 | 2.09E-07 | 1.61E-07 |
| cgd4_1770 |          |          |          |          |

|     |           |          |          |          |
|-----|-----------|----------|----------|----------|
| 2h  | 5.50E-08  | 1.32E-08 | 2.66E-07 | 7.90E-07 |
| 6h  | 2.83E-07  | 2.25E-07 | 1.14E-06 | 1.39E-06 |
| 12h | 2.08E-08  | 2.69E-08 | 1.07E-07 | 5.28E-07 |
| 24h | 4.66E-08  | 4.82E-08 | 8.23E-07 | 8.98E-07 |
| 36h | 5.70E-08  | 1.10E-07 | 6.35E-07 | 1.30E-06 |
| 48h | 5.17E-08  | 5.15E-08 | 2.20E-07 | 3.08E-07 |
| 72h | 1.55E-08  | 5.59E-08 | 1.45E-07 | 4.44E-08 |
|     | cgd4_1780 |          |          |          |
| 2h  | 0.00E+00  | 0.00E+00 | 0.00E+00 | 0.00E+00 |
| 6h  | 0.00E+00  | 0.00E+00 | 0.00E+00 | 0.00E+00 |
| 12h | 4.59E-09  | 2.88E-09 | 7.52E-09 | 2.85E-08 |
| 24h | 6.12E-10  | 1.72E-09 | 2.86E-08 | 4.20E-08 |
| 36h | 2.29E-08  | 1.63E-08 | 1.41E-07 | 1.24E-07 |
| 48h | 6.44E-09  | 3.30E-09 | 1.13E-08 | 4.64E-08 |
| 72h | 2.04E-08  | 1.05E-08 | 4.21E-08 | 1.15E-08 |
|     | cgd4_1790 |          |          |          |
| 2h  | 0.00E+00  | 0.00E+00 | 0.00E+00 | 0.00E+00 |
| 6h  | 6.42E-06  | 1.51E-07 | 4.87E-07 | 4.88E-06 |
| 12h | 4.78E-06  | 9.41E-05 | 1.35E-04 | 1.34E-04 |
| 24h | 2.99E-06  | 1.49E-06 | 7.70E-06 | 4.52E-05 |
| 36h | 3.52E-06  | 4.08E-06 | 1.29E-04 | 6.70E-05 |
| 48h | 3.85E-06  | 5.04E-06 | 6.25E-06 | 2.18E-05 |
| 72h | 4.79E-06  | 1.66E-06 | 4.03E-06 | 3.95E-05 |
|     | cgd4_1800 |          |          |          |
| 2h  | 0.00E+00  | 0.00E+00 | 0.00E+00 | 0.00E+00 |
| 6h  | 6.75E-06  | 5.65E-06 | 2.09E-05 | 2.43E-05 |
| 12h | 4.72E-07  | 1.39E-06 | 5.06E-06 | 6.56E-06 |
| 24h | 2.18E-06  | 9.62E-07 | 1.95E-05 | 1.40E-04 |
| 36h | 9.11E-06  | 4.85E-06 | 8.22E-05 | 2.96E-05 |
| 48h | 2.29E-05  | 1.34E-05 | 8.71E-05 | 1.09E-04 |
| 72h | 3.32E-05  | 3.77E-05 | 1.71E-04 | 7.44E-05 |
|     | cgd4_1840 |          |          |          |
| 2h  | 4.38E-07  | 1.00E-06 | 4.25E-06 | 3.24E-06 |
| 6h  | 2.25E-07  | 1.99E-07 | 7.65E-07 | 8.35E-07 |
| 12h | 4.17E-07  | 5.37E-07 | 3.69E-06 | 6.97E-06 |
| 24h | 2.47E-07  | 3.27E-07 | 8.98E-07 | 3.09E-06 |
| 36h | 4.09E-07  | 5.21E-07 | 3.37E-06 | 1.75E-06 |
| 48h | 1.23E-07  | 1.09E-07 | 6.85E-07 | 1.36E-06 |
| 72h | 1.58E-07  | 1.62E-07 | 5.80E-07 | 1.19E-07 |
|     | cgd4_1850 |          |          |          |
| 2h  | 1.21E-05  | 2.59E-06 | 1.16E-05 | 8.08E-07 |
| 6h  | 6.20E-06  | 2.50E-05 | 6.90E-04 | 1.10E-03 |
| 12h | 1.69E-07  | 0.00E+00 | 8.45E-08 | 3.45E-06 |
| 24h | 3.21E-06  | 5.35E-06 | 1.33E-04 | 2.63E-04 |
| 36h | 4.28E-05  | 1.89E-05 | 6.48E-05 | 9.39E-05 |
| 48h | 9.49E-06  | 1.76E-05 | 2.32E-04 | 1.83E-04 |
| 72h | 9.10E-06  | 5.44E-06 | 5.93E-06 | 1.80E-06 |
|     | cgd4_1860 |          |          |          |
| 2h  | 9.71E-09  | 5.40E-08 | 3.47E-08 | 4.11E-08 |
| 6h  | 1.08E-08  | 1.46E-08 | 4.00E-08 | 2.85E-07 |
| 12h | 3.01E-08  | 3.05E-08 | 4.21E-07 | 4.19E-07 |
| 24h | 1.50E-08  | 1.32E-08 | 1.27E-07 | 6.52E-07 |
| 36h | 8.24E-08  | 1.02E-07 | 6.71E-07 | 3.40E-07 |



|     |           |          |          |          |
|-----|-----------|----------|----------|----------|
| 48h | 5.90E-08  | 7.28E-08 | 1.73E-07 | 3.39E-07 |
| 72h | 2.02E-08  | 8.85E-09 | 8.46E-08 | 1.33E-08 |
|     | cgd4_1870 |          |          |          |
| 2h  | 3.01E-09  | 0.00E+00 | 0.00E+00 | 0.00E+00 |
| 6h  | 0.00E+00  | 0.00E+00 | 0.00E+00 | 0.00E+00 |
| 12h | 0.00E+00  | 0.00E+00 | 8.76E-08 | 0.00E+00 |
| 24h | 2.96E-09  | 2.20E-09 | 2.96E-08 | 6.51E-09 |
| 36h | 3.98E-08  | 5.27E-09 | 1.35E-07 | 2.35E-08 |
| 48h | 1.22E-07  | 6.52E-08 | 7.46E-07 | 1.53E-07 |
| 72h | 1.36E-08  | 1.64E-08 | 2.31E-07 | 8.12E-09 |
|     | cgd4_1880 |          |          |          |
| 2h  | 0.00E+00  | 3.32E-05 | 0.00E+00 | 1.47E-05 |
| 6h  | 4.40E-05  | 0.00E+00 | 0.00E+00 | 0.00E+00 |
| 12h | 0.00E+00  | 0.00E+00 | 8.39E-05 | 0.00E+00 |
| 24h | 4.05E-06  | 7.54E-06 | 0.00E+00 | 4.12E-06 |
| 36h | 1.79E-05  | 3.86E-05 | 7.20E-05 | 2.37E-04 |
| 48h | 4.46E-04  | 6.24E-04 | 9.23E-04 | 2.59E-03 |
| 72h | 3.98E-04  | 3.42E-04 | 3.18E-03 | 7.26E-04 |
|     | cgd4_1890 |          |          |          |
| 2h  | 6.00E-06  | 9.14E-06 | 5.13E-05 | 1.97E-05 |
| 6h  | 7.75E-07  | 5.21E-07 | 1.80E-06 | 4.03E-06 |
| 12h | 5.61E-07  | 4.75E-07 | 6.28E-06 | 5.64E-06 |
| 24h | 2.07E-06  | 1.46E-06 | 6.61E-06 | 8.25E-06 |
| 36h | 1.34E-06  | 1.00E-06 | 5.49E-06 | 2.20E-06 |
| 48h | 1.06E-06  | 1.27E-06 | 4.01E-06 | 1.87E-06 |
| 72h | 6.33E-07  | 5.78E-07 | 2.47E-06 | 2.86E-06 |
|     | cgd4_1910 |          |          |          |
| 2h  | 0.00E+00  | 0.00E+00 | 2.14E-06 | 4.07E-07 |
| 6h  | 0.00E+00  | 0.00E+00 | 4.54E-08 | 0.00E+00 |
| 12h | 9.60E-08  | 2.15E-08 | 0.00E+00 | 3.24E-07 |
| 24h | 6.24E-08  | 3.63E-07 | 2.71E-06 | 1.04E-06 |
| 36h | 1.26E-06  | 5.05E-07 | 3.27E-05 | 4.26E-06 |
| 48h | 1.28E-04  | 4.64E-05 | 1.69E-03 | 1.84E-03 |
| 72h | 7.46E-05  | 1.18E-04 | 4.83E-04 | 1.77E-04 |
|     | cgd4_1920 |          |          |          |
| 2h  | 4.05E-05  | 3.06E-05 | 1.47E-04 | 1.37E-04 |
| 6h  | 1.61E-04  | 1.23E-04 | 7.98E-04 | 9.95E-04 |
| 12h | 4.17E-06  | 1.76E-06 | 2.47E-04 | 2.27E-04 |
| 24h | 2.73E-05  | 2.16E-05 | 9.09E-04 | 8.03E-04 |
| 36h | 3.05E-05  | 2.85E-05 | 2.93E-04 | 1.29E-04 |
| 48h | 2.10E-05  | 1.23E-05 | 1.90E-04 | 9.37E-05 |
| 72h | 4.12E-06  | 3.60E-06 | 1.83E-05 | 1.20E-05 |
|     | cgd4_1930 |          |          |          |
| 2h  | 5.02E-09  | 0.00E+00 | 6.61E-08 | 2.75E-08 |
| 6h  | 1.95E-08  | 3.64E-08 | 1.45E-07 | 4.90E-07 |
| 12h | 2.46E-08  | 0.00E+00 | 1.77E-09 | 9.08E-09 |
| 24h | 1.84E-08  | 9.31E-09 | 2.20E-07 | 4.86E-07 |
| 36h | 3.13E-08  | 5.02E-08 | 1.59E-07 | 7.79E-08 |
| 48h | 4.39E-08  | 9.02E-09 | 1.22E-07 | 1.04E-07 |
| 72h | 5.02E-08  | 3.16E-08 | 1.22E-07 | 4.78E-08 |
|     | cgd4_1950 |          |          |          |
| 2h  | 6.50E-05  | 3.68E-05 | 1.60E-04 | 9.60E-05 |
| 6h  | 1.02E-04  | 2.79E-05 | 1.43E-04 | 3.28E-04 |

|           |          |          |          |          |
|-----------|----------|----------|----------|----------|
| 12h       | 2.63E-05 | 2.19E-05 | 1.93E-04 | 4.94E-04 |
| 24h       | 4.05E-05 | 1.17E-05 | 3.09E-04 | 2.72E-04 |
| 36h       | 6.45E-05 | 2.09E-05 | 4.05E-04 | 2.18E-04 |
| 48h       | 2.05E-05 | 1.58E-05 | 3.03E-04 | 1.63E-04 |
| 72h       | 2.27E-05 | 1.32E-05 | 2.75E-04 | 4.47E-05 |
| cgd4_1960 |          |          |          |          |
| 2h        | 5.96E-08 | 1.30E-07 | 7.67E-08 | 3.52E-08 |
| 6h        | 1.98E-07 | 3.08E-08 | 4.96E-07 | 5.13E-07 |
| 12h       | 5.58E-08 | 2.91E-08 | 2.44E-07 | 2.60E-07 |
| 24h       | 6.28E-08 | 5.44E-08 | 3.91E-07 | 2.91E-07 |
| 36h       | 1.66E-07 | 1.33E-07 | 6.69E-07 | 6.55E-07 |
| 48h       | 5.58E-08 | 4.13E-08 | 1.79E-07 | 1.41E-07 |
| 72h       | 8.77E-08 | 4.83E-08 | 2.21E-07 | 1.39E-07 |
| cgd4_1970 |          |          |          |          |
| 2h        | 2.85E-06 | 4.59E-07 | 5.20E-06 | 4.69E-07 |
| 6h        | 4.65E-06 | 1.68E-06 | 3.52E-05 | 1.59E-05 |
| 12h       | 4.80E-04 | 2.93E-04 | 2.43E-03 | 1.84E-03 |
| 24h       | 4.20E-05 | 2.99E-05 | 7.06E-05 | 3.24E-04 |
| 36h       | 3.88E-05 | 2.32E-05 | 9.33E-04 | 8.52E-04 |
| 48h       | 5.36E-05 | 1.99E-05 | 2.24E-04 | 1.22E-04 |
| 72h       | 1.18E-05 | 1.26E-05 | 7.03E-05 | 2.75E-05 |
| cgd4_1980 |          |          |          |          |
| 2h        | 2.41E-08 | 4.58E-08 | 3.88E-07 | 1.36E-08 |
| 6h        | 1.92E-08 | 2.61E-08 | 5.30E-07 | 2.72E-07 |
| 12h       | 1.24E-06 | 1.99E-06 | 4.34E-05 | 3.35E-06 |
| 24h       | 4.60E-07 | 5.68E-07 | 9.25E-07 | 2.30E-06 |
| 36h       | 2.55E-06 | 1.09E-06 | 7.62E-05 | 4.83E-06 |
| 48h       | 7.62E-07 | 4.80E-07 | 3.15E-06 | 2.50E-06 |
| 72h       | 1.01E-06 | 4.44E-07 | 3.36E-06 | 2.76E-06 |
| cgd4_2000 |          |          |          |          |
| 2h        | 0.00E+00 | 0.00E+00 | 0.00E+00 | 0.00E+00 |
| 6h        | 0.00E+00 | 4.07E-09 | 0.00E+00 | 0.00E+00 |
| 12h       | 9.46E-06 | 8.61E-06 | 5.99E-05 | 5.61E-05 |
| 24h       | 1.01E-06 | 2.47E-06 | 1.89E-05 | 4.16E-06 |
| 36h       | 2.23E-06 | 1.96E-06 | 1.00E-04 | 3.40E-05 |
| 48h       | 4.91E-07 | 8.34E-07 | 8.72E-06 | 4.49E-05 |
| 72h       | 5.84E-07 | 4.00E-07 | 4.89E-06 | 4.13E-06 |
| cgd4_2010 |          |          |          |          |
| 2h        | 2.85E-07 | 3.19E-07 | 5.72E-07 | 1.25E-07 |
| 6h        | 6.26E-08 | 4.83E-08 | 4.27E-07 | 9.20E-08 |
| 12h       | 1.16E-07 | 7.96E-08 | 1.61E-07 | 6.55E-07 |
| 24h       | 1.77E-07 | 2.74E-07 | 2.08E-07 | 5.82E-07 |
| 36h       | 3.45E-07 | 9.04E-08 | 4.56E-07 | 8.43E-07 |
| 48h       | 1.45E-07 | 1.54E-07 | 5.49E-07 | 5.65E-07 |
| 72h       | 3.99E-08 | 1.81E-08 | 5.64E-07 | 1.90E-07 |
| cgd4_2030 |          |          |          |          |
| 2h        | 3.42E-09 | 0.00E+00 | 1.53E-09 | 0.00E+00 |
| 6h        | 0.00E+00 | 0.00E+00 | 1.73E-08 | 2.28E-08 |
| 12h       | 1.76E-08 | 1.66E-08 | 6.77E-08 | 2.71E-08 |
| 24h       | 5.17E-09 | 1.70E-08 | 4.61E-08 | 5.29E-08 |
| 36h       | 2.84E-08 | 1.24E-08 | 1.03E-07 | 1.92E-07 |
| 48h       | 5.13E-08 | 2.49E-08 | 1.84E-07 | 6.28E-08 |
| 72h       | 7.12E-09 | 7.26E-09 | 3.55E-08 | 5.03E-08 |

|     |           |          |          |          |
|-----|-----------|----------|----------|----------|
|     | cgd4_2070 |          |          |          |
| 2h  | 0.00E+00  | 0.00E+00 | 0.00E+00 | 0.00E+00 |
| 6h  | 1.38E-09  | 0.00E+00 | 0.00E+00 | 0.00E+00 |
| 12h | 0.00E+00  | 0.00E+00 | 0.00E+00 | 0.00E+00 |
| 24h | 4.61E-10  | 2.27E-09 | 3.47E-09 | 1.16E-09 |
| 36h | 6.51E-09  | 8.04E-10 | 1.41E-08 | 6.31E-09 |
| 48h | 1.24E-08  | 5.95E-09 | 4.13E-08 | 2.73E-08 |
| 72h | 1.31E-08  | 6.13E-09 | 2.35E-07 | 1.79E-08 |
|     | cgd4_2080 |          |          |          |
| 2h  | 0.00E+00  | 0.00E+00 | 0.00E+00 | 0.00E+00 |
| 6h  | 7.16E-08  | 3.64E-07 | 8.33E-08 | 1.09E-07 |
| 12h | 2.99E-09  | 5.40E-08 | 6.74E-08 | 1.81E-07 |
| 24h | 5.42E-08  | 6.29E-08 | 2.35E-06 | 3.22E-07 |
| 36h | 1.65E-07  | 6.72E-08 | 8.26E-07 | 6.35E-07 |
| 48h | 7.46E-08  | 4.38E-08 | 1.99E-07 | 1.81E-07 |
| 72h | 7.49E-08  | 3.45E-08 | 5.47E-07 | 5.84E-08 |
|     | cgd4_2090 |          |          |          |
| 2h  | 0.00E+00  | 0.00E+00 | 0.00E+00 | 0.00E+00 |
| 6h  | 1.55E-07  | 3.78E-07 | 2.20E-06 | 1.29E-06 |
| 12h | 1.21E-06  | 7.77E-07 | 4.19E-06 | 3.24E-06 |
| 24h | 3.24E-07  | 5.09E-07 | 1.93E-06 | 9.51E-07 |
| 36h | 2.08E-07  | 7.30E-08 | 3.30E-06 | 1.53E-06 |
| 48h | 2.75E-08  | 9.79E-08 | 1.01E-06 | 5.79E-07 |
| 72h | 2.04E-08  | 2.63E-08 | 1.45E-07 | 4.95E-08 |
|     | cgd4_2100 |          |          |          |
| 2h  | 0.00E+00  | 0.00E+00 | 0.00E+00 | 0.00E+00 |
| 6h  | 3.93E-08  | 3.50E-08 | 2.23E-07 | 1.15E-06 |
| 12h | 6.87E-09  | 2.76E-10 | 7.89E-08 | 4.34E-08 |
| 24h | 6.88E-09  | 1.50E-08 | 4.19E-07 | 3.22E-07 |
| 36h | 5.42E-08  | 3.13E-08 | 4.58E-07 | 2.04E-07 |
| 48h | 1.90E-08  | 3.52E-08 | 1.63E-07 | 9.71E-08 |
| 72h | 5.42E-08  | 1.86E-08 | 1.48E-07 | 2.60E-06 |
|     | cgd4_2120 |          |          |          |
| 2h  | 0.00E+00  | 0.00E+00 | 0.00E+00 | 0.00E+00 |
| 6h  | 8.19E-06  | 1.00E-05 | 4.48E-05 | 3.30E-05 |
| 12h | 1.78E-06  | 8.28E-07 | 2.10E-05 | 1.03E-05 |
| 24h | 1.05E-06  | 1.46E-06 | 1.81E-05 | 3.59E-05 |
| 36h | 3.74E-06  | 3.06E-06 | 3.29E-05 | 1.92E-05 |
| 48h | 9.01E-07  | 1.28E-06 | 9.62E-06 | 5.64E-06 |
| 72h | 3.87E-07  | 1.28E-06 | 2.24E-05 | 5.11E-06 |
|     | cgd4_2130 |          |          |          |
| 2h  | 1.40E-04  | 0.00E+00 | 0.00E+00 | 0.00E+00 |
| 6h  | 2.02E-06  | 1.18E-06 | 3.93E-05 | 1.86E-05 |
| 12h | 5.19E-06  | 1.76E-06 | 5.83E-05 | 9.66E-06 |
| 24h | 6.44E-07  | 1.11E-06 | 9.40E-06 | 1.17E-05 |
| 36h | 6.03E-06  | 3.82E-06 | 1.95E-04 | 2.61E-05 |
| 48h | 1.42E-06  | 1.87E-06 | 1.63E-04 | 7.59E-06 |
| 72h | 1.66E-06  | 2.86E-06 | 3.61E-05 | 4.00E-06 |
|     | cgd4_2140 |          |          |          |
| 2h  | 2.23E-08  | 4.43E-08 | 1.12E-09 | 3.05E-08 |
| 6h  | 1.65E-09  | 1.79E-08 | 4.92E-08 | 1.51E-07 |
| 12h | 1.11E-06  | 4.19E-07 | 2.38E-06 | 4.99E-06 |
| 24h | 5.44E-08  | 2.43E-08 | 1.44E-07 | 2.79E-07 |

|     |           |          |          |          |
|-----|-----------|----------|----------|----------|
| 36h | 1.48E-07  | 9.82E-08 | 1.75E-06 | 2.09E-06 |
| 48h | 3.57E-08  | 1.87E-08 | 1.69E-07 | 2.36E-07 |
| 72h | 6.00E-08  | 5.25E-08 | 3.93E-07 | 1.05E-07 |
|     | cgd4_2150 |          |          |          |
| 2h  | 1.80E-07  | 4.50E-08 | 1.64E-08 | 8.86E-09 |
| 6h  | 3.20E-08  | 6.76E-08 | 9.65E-08 | 3.37E-07 |
| 12h | 1.42E-08  | 1.62E-08 | 1.25E-07 | 2.62E-07 |
| 24h | 6.92E-09  | 6.45E-09 | 6.15E-08 | 3.11E-07 |
| 36h | 8.26E-08  | 4.10E-08 | 5.85E-07 | 3.37E-07 |
| 48h | 5.93E-08  | 4.87E-08 | 2.23E-07 | 1.67E-07 |
| 72h | 2.85E-08  | 6.47E-08 | 1.37E-07 | 4.16E-08 |
|     | cgd4_2160 |          |          |          |
| 2h  | 1.99E-07  | 1.14E-07 | 5.97E-08 | 3.67E-07 |
| 6h  | 1.46E-07  | 1.64E-07 | 6.24E-07 | 1.17E-06 |
| 12h | 1.35E-08  | 6.48E-09 | 1.46E-07 | 2.19E-07 |
| 24h | 2.70E-08  | 1.86E-08 | 1.44E-07 | 4.26E-07 |
| 36h | 1.23E-07  | 1.02E-07 | 3.55E-07 | 2.15E-07 |
| 48h | 4.70E-08  | 4.16E-08 | 1.96E-07 | 1.96E-07 |
| 72h | 1.37E-08  | 3.30E-08 | 9.78E-08 | 3.54E-08 |
|     | cgd4_2170 |          |          |          |
| 2h  | 1.84E-07  | 4.90E-08 | 2.11E-08 | 2.04E-07 |
| 6h  | 7.59E-08  | 5.39E-08 | 6.94E-07 | 4.48E-07 |
| 12h | 2.17E-09  | 2.76E-09 | 1.06E-07 | 5.40E-08 |
| 24h | 9.41E-09  | 9.16E-09 | 2.40E-07 | 3.06E-07 |
| 36h | 6.48E-08  | 3.86E-08 | 7.88E-08 | 1.78E-07 |
| 48h | 4.29E-08  | 3.12E-08 | 1.13E-07 | 7.01E-08 |
| 72h | 1.08E-08  | 1.48E-08 | 1.25E-08 | 5.68E-09 |
|     | cgd4_2180 |          |          |          |
| 2h  | 1.65E-07  | 1.90E-06 | 0.00E+00 | 1.71E-06 |
| 6h  | 2.63E-05  | 3.26E-05 | 1.21E-04 | 8.74E-05 |
| 12h | 2.06E-07  | 4.55E-07 | 8.15E-06 | 3.02E-06 |
| 24h | 5.96E-06  | 2.36E-06 | 7.68E-05 | 8.37E-05 |
| 36h | 7.64E-06  | 8.40E-06 | 4.27E-05 | 1.71E-05 |
| 48h | 7.41E-06  | 1.05E-05 | 2.71E-05 | 2.96E-05 |
| 72h | 3.87E-07  | 1.58E-06 | 1.47E-05 | 1.28E-06 |
|     | cgd4_2200 |          |          |          |
| 2h  | 0.00E+00  | 0.00E+00 | 0.00E+00 | 0.00E+00 |
| 6h  | 1.93E-08  | 2.70E-09 | 5.08E-09 | 1.60E-07 |
| 12h | 8.19E-08  | 1.81E-08 | 7.15E-07 | 6.75E-07 |
| 24h | 8.69E-08  | 5.37E-08 | 1.39E-06 | 2.85E-06 |
| 36h | 2.14E-07  | 1.65E-07 | 2.29E-06 | 7.59E-07 |
| 48h | 1.45E-07  | 7.87E-07 | 1.67E-06 | 1.74E-06 |
| 72h | 1.61E-08  | 4.81E-08 | 2.02E-07 | 6.10E-08 |
|     | cgd4_2210 |          |          |          |
| 2h  | 0.00E+00  | 0.00E+00 | 0.00E+00 | 0.00E+00 |
| 6h  | 1.58E-07  | 2.25E-07 | 1.30E-06 | 1.91E-06 |
| 12h | 1.03E-08  | 1.92E-08 | 7.78E-08 | 3.82E-08 |
| 24h | 4.35E-08  | 4.06E-08 | 1.58E-06 | 1.95E-06 |
| 36h | 3.14E-07  | 3.98E-07 | 1.35E-06 | 1.09E-06 |
| 48h | 2.29E-07  | 6.09E-07 | 1.19E-06 | 6.57E-06 |
| 72h | 3.75E-08  | 1.46E-07 | 1.70E-07 | 1.57E-07 |
|     | cgd4_2220 |          |          |          |
| 2h  | 1.54E-05  | 1.60E-03 | 3.09E-05 | 0.00E+00 |

|     |           |          |          |          |
|-----|-----------|----------|----------|----------|
| 6h  | 2.80E-03  | 4.86E-03 | 1.55E-02 | 1.25E-02 |
| 12h | 1.13E-04  | 3.45E-05 | 1.59E-03 | 8.77E-04 |
| 24h | 8.29E-04  | 5.77E-04 | 1.85E-03 | 7.52E-03 |
| 36h | 1.71E-03  | 1.52E-03 | 2.06E-03 | 3.56E-03 |
| 48h | 1.15E-03  | 1.24E-03 | 8.34E-04 | 2.25E-03 |
| 72h | 5.86E-04  | 9.49E-05 | 1.04E-03 | 8.03E-04 |
|     | cgd4_2230 |          |          |          |
| 2h  | 8.89E-08  | 1.79E-07 | 4.91E-08 | 5.08E-08 |
| 6h  | 2.38E-06  | 7.36E-07 | 3.83E-06 | 4.15E-06 |
| 12h | 2.72E-08  | 1.25E-08 | 2.67E-07 | 2.18E-07 |
| 24h | 4.63E-07  | 1.96E-07 | 3.35E-06 | 1.21E-06 |
| 36h | 2.51E-07  | 4.41E-07 | 5.55E-07 | 2.98E-07 |
| 48h | 2.88E-07  | 1.12E-07 | 3.40E-06 | 1.15E-06 |
| 72h | 7.86E-08  | 1.14E-07 | 6.26E-07 | 6.68E-08 |
|     | cgd4_2240 |          |          |          |
| 2h  | 2.99E-06  | 4.02E-06 | 1.40E-05 | 4.89E-06 |
| 6h  | 4.52E-05  | 1.59E-05 | 4.57E-04 | 1.41E-04 |
| 12h | 3.52E-07  | 9.50E-07 | 2.70E-05 | 9.84E-06 |
| 24h | 1.28E-05  | 5.13E-06 | 2.89E-04 | 7.81E-05 |
| 36h | 8.94E-06  | 1.22E-05 | 7.65E-05 | 1.68E-05 |
| 48h | 6.94E-06  | 3.11E-06 | 1.06E-04 | 2.17E-05 |
| 72h | 3.09E-06  | 3.01E-06 | 2.36E-05 | 2.43E-06 |
|     | cgd4_2250 |          |          |          |
| 2h  | 9.39E-08  | 1.57E-07 | 1.63E-07 | 1.25E-07 |
| 6h  | 3.43E-06  | 2.18E-06 | 6.58E-06 | 1.41E-05 |
| 12h | 1.43E-08  | 1.72E-07 | 3.64E-07 | 1.42E-06 |
| 24h | 8.10E-07  | 5.37E-07 | 1.76E-05 | 1.19E-05 |
| 36h | 1.46E-06  | 2.46E-06 | 2.01E-05 | 3.96E-06 |
| 48h | 1.27E-06  | 7.45E-07 | 8.76E-06 | 6.85E-06 |
| 72h | 2.78E-07  | 5.71E-07 | 3.72E-07 | 9.13E-07 |
|     | cgd4_2280 |          |          |          |
| 2h  | 1.20E-03  | 9.73E-04 | 4.43E-04 | 1.64E-03 |
| 6h  | 2.02E-04  | 6.48E-04 | 1.01E-03 | 7.49E-04 |
| 12h | 9.56E-04  | 4.02E-03 | 2.61E-03 | 4.39E-03 |
| 24h | 4.25E-04  | 6.43E-04 | 2.85E-03 | 2.21E-03 |
| 36h | 2.26E-04  | 5.21E-04 | 5.81E-03 | 4.71E-03 |
| 48h | 3.79E-04  | 2.70E-04 | 3.13E-03 | 1.85E-03 |
| 72h | 2.06E-04  | 2.52E-04 | 5.92E-04 | 2.83E-04 |
|     | cgd4_2290 |          |          |          |
| 2h  | 8.08E-08  | 7.82E-08 | 2.96E-07 | 2.93E-07 |
| 6h  | 2.11E-07  | 1.58E-07 | 1.77E-06 | 8.46E-07 |
| 12h | 5.85E-08  | 3.00E-07 | 5.97E-07 | 8.00E-07 |
| 24h | 6.59E-08  | 1.26E-07 | 6.33E-07 | 2.67E-07 |
| 36h | 1.37E-07  | 3.52E-07 | 1.18E-06 | 6.12E-07 |
| 48h | 3.96E-08  | 6.28E-08 | 5.16E-07 | 2.84E-07 |
| 72h | 1.27E-07  | 1.73E-07 | 6.01E-07 | 2.32E-07 |
|     | cgd4_2310 |          |          |          |
| 2h  | 0.00E+00  | 0.00E+00 | 9.29E-09 | 1.09E-08 |
| 6h  | 2.63E-08  | 4.97E-09 | 8.45E-08 | 1.19E-07 |
| 12h | 1.42E-06  | 5.14E-06 | 6.27E-06 | 5.48E-06 |
| 24h | 9.28E-08  | 1.24E-07 | 3.77E-07 | 4.56E-07 |
| 36h | 4.16E-07  | 6.52E-07 | 6.37E-06 | 2.57E-06 |
| 48h | 7.32E-08  | 1.43E-07 | 5.08E-07 | 5.37E-07 |

|     |           |          |          |          |
|-----|-----------|----------|----------|----------|
| 72h | 1.34E-07  | 9.60E-08 | 4.16E-07 | 9.57E-08 |
|     | cgd4_2320 |          |          |          |
| 2h  | 0.00E+00  | 0.00E+00 | 0.00E+00 | 0.00E+00 |
| 6h  | 3.18E-07  | 2.04E-07 | 3.58E-07 | 3.54E-07 |
| 12h | 2.91E-07  | 2.17E-07 | 9.71E-07 | 1.01E-06 |
| 24h | 9.81E-08  | 3.00E-07 | 6.48E-07 | 6.01E-07 |
| 36h | 6.33E-07  | 4.74E-07 | 2.95E-06 | 2.46E-06 |
| 48h | 2.55E-07  | 2.08E-07 | 1.08E-06 | 8.16E-07 |
| 72h | 1.39E-07  | 8.20E-08 | 5.37E-07 | 1.46E-07 |
|     | cgd4_2330 |          |          |          |
| 2h  | 0.00E+00  | 0.00E+00 | 0.00E+00 | 0.00E+00 |
| 6h  | 1.81E-08  | 3.55E-08 | 3.17E-06 | 3.51E-07 |
| 12h | 2.61E-06  | 2.85E-06 | 1.17E-05 | 1.35E-05 |
| 24h | 1.64E-07  | 3.32E-07 | 7.51E-07 | 1.58E-06 |
| 36h | 3.16E-07  | 3.51E-07 | 5.14E-06 | 2.22E-06 |
| 48h | 1.64E-07  | 2.66E-07 | 1.42E-06 | 6.84E-07 |
| 72h | 2.83E-07  | 1.28E-07 | 7.94E-07 | 3.75E-07 |
|     | cgd4_2340 |          |          |          |
| 2h  | 0.00E+00  | 0.00E+00 | 0.00E+00 | 0.00E+00 |
| 6h  | 0.00E+00  | 0.00E+00 | 0.00E+00 | 0.00E+00 |
| 12h | 5.29E-06  | 1.12E-05 | 4.01E-05 | 6.98E-05 |
| 24h | 9.04E-07  | 2.17E-06 | 2.41E-06 | 1.75E-06 |
| 36h | 1.09E-06  | 6.06E-07 | 3.17E-05 | 5.30E-06 |
| 48h | 5.62E-07  | 5.83E-07 | 5.69E-06 | 1.88E-06 |
| 72h | 2.41E-07  | 2.59E-07 | 1.02E-06 | 9.00E-07 |
|     | cgd4_2360 |          |          |          |
| 2h  | 7.25E-06  | 1.15E-05 | 8.47E-06 | 1.36E-05 |
| 6h  | 2.36E-05  | 2.69E-05 | 2.24E-04 | 1.62E-04 |
| 12h | 3.87E-05  | 6.51E-05 | 2.61E-04 | 4.24E-04 |
| 24h | 2.07E-05  | 3.37E-05 | 1.06E-04 | 1.58E-04 |
| 36h | 9.96E-06  | 8.90E-06 | 7.50E-05 | 5.16E-05 |
| 48h | 1.15E-05  | 1.13E-05 | 5.15E-05 | 4.23E-05 |
| 72h | 1.33E-06  | 9.10E-07 | 6.69E-06 | 1.52E-06 |
|     | cgd4_2380 |          |          |          |
| 2h  | 1.20E-07  | 6.17E-08 | 2.06E-07 | 5.58E-08 |
| 6h  | 6.92E-08  | 1.86E-07 | 1.15E-06 | 4.93E-07 |
| 12h | 5.23E-08  | 6.48E-09 | 3.58E-07 | 2.22E-07 |
| 24h | 6.59E-08  | 5.03E-08 | 3.09E-07 | 3.32E-07 |
| 36h | 2.77E-07  | 1.73E-07 | 1.07E-06 | 2.14E-07 |
| 48h | 1.31E-07  | 1.09E-07 | 7.09E-07 | 4.10E-07 |
| 72h | 2.12E-08  | 3.81E-08 | 2.57E-08 | 1.75E-08 |
|     | cgd4_2390 |          |          |          |
| 2h  | 9.69E-07  | 8.01E-07 | 1.61E-06 | 4.76E-07 |
| 6h  | 5.87E-07  | 3.15E-06 | 4.29E-06 | 2.00E-06 |
| 12h | 8.17E-07  | 8.50E-07 | 3.11E-06 | 3.58E-06 |
| 24h | 7.91E-07  | 1.45E-06 | 5.82E-06 | 2.72E-06 |
| 36h | 1.49E-06  | 5.44E-06 | 5.33E-06 | 1.46E-06 |
| 48h | 6.07E-07  | 1.65E-05 | 2.79E-06 | 1.26E-06 |
| 72h | 1.90E-07  | 1.96E-04 | 9.36E-07 | 3.24E-07 |
|     | cgd4_2410 |          |          |          |
| 2h  | 8.90E-08  | 8.32E-08 | 3.38E-08 | 1.81E-08 |
| 6h  | 6.21E-09  | 2.68E-08 | 1.67E-08 | 1.85E-09 |
| 12h | 4.96E-09  | 3.23E-09 | 4.25E-08 | 1.66E-08 |

|           |          |          |          |          |
|-----------|----------|----------|----------|----------|
| 24h       | 4.10E-08 | 3.22E-08 | 4.23E-07 | 3.32E-07 |
| 36h       | 2.00E-07 | 9.75E-08 | 5.82E-07 | 4.68E-07 |
| 48h       | 2.58E-06 | 2.41E-06 | 1.46E-05 | 1.40E-05 |
| 72h       | 3.78E-07 | 4.19E-07 | 7.85E-07 | 2.53E-07 |
| cgd4_2420 |          |          |          |          |
| 2h        | 0.00E+00 | 2.15E-09 | 8.84E-08 | 7.23E-08 |
| 6h        | 2.38E-08 | 3.67E-08 | 5.67E-07 | 2.66E-07 |
| 12h       | 4.13E-07 | 3.30E-07 | 4.45E-07 | 8.56E-07 |
| 24h       | 7.44E-08 | 1.49E-07 | 1.40E-06 | 1.64E-06 |
| 36h       | 1.01E-07 | 7.34E-08 | 7.53E-07 | 7.12E-07 |
| 48h       | 1.62E-07 | 2.23E-07 | 1.37E-06 | 1.28E-06 |
| 72h       | 1.32E-07 | 2.02E-07 | 4.02E-07 | 2.64E-07 |
| cgd4_2470 |          |          |          |          |
| 2h        | 0.00E+00 | 0.00E+00 | 0.00E+00 | 0.00E+00 |
| 6h        | 0.00E+00 | 0.00E+00 | 0.00E+00 | 0.00E+00 |
| 12h       | 1.01E-05 | 4.48E-06 | 7.48E-06 | 1.43E-05 |
| 24h       | 2.00E-06 | 2.01E-06 | 7.76E-06 | 8.66E-06 |
| 36h       | 8.97E-06 | 3.61E-06 | 2.45E-05 | 3.59E-05 |
| 48h       | 5.17E-07 | 6.96E-07 | 5.49E-06 | 2.66E-06 |
| 72h       | 3.51E-07 | 1.92E-07 | 8.80E-07 | 4.26E-07 |
| cgd4_2480 |          |          |          |          |
| 2h        | 0.00E+00 | 0.00E+00 | 0.00E+00 | 0.00E+00 |
| 6h        | 2.85E-07 | 2.96E-07 | 3.73E-07 | 3.26E-06 |
| 12h       | 6.20E-04 | 7.61E-04 | 2.59E-03 | 2.25E-03 |
| 24h       | 5.09E-05 | 3.86E-05 | 1.62E-04 | 2.58E-04 |
| 36h       | 5.03E-04 | 1.30E-04 | 3.42E-03 | 7.23E-03 |
| 48h       | 2.83E-05 | 3.86E-05 | 5.04E-05 | 1.04E-04 |
| 72h       | 6.63E-06 | 7.31E-06 | 8.21E-06 | 9.77E-06 |
| cgd4_2490 |          |          |          |          |
| 2h        | 0.00E+00 | 0.00E+00 | 0.00E+00 | 0.00E+00 |
| 6h        | 0.00E+00 | 0.00E+00 | 0.00E+00 | 0.00E+00 |
| 12h       | 2.15E-08 | 3.78E-09 | 4.47E-09 | 1.14E-08 |
| 24h       | 4.05E-09 | 7.65E-09 | 2.14E-08 | 5.33E-09 |
| 36h       | 2.68E-08 | 5.48E-09 | 7.58E-08 | 1.26E-07 |
| 48h       | 8.65E-09 | 1.45E-08 | 6.74E-08 | 9.84E-08 |
| 72h       | 4.65E-08 | 4.03E-08 | 1.41E-07 | 2.67E-08 |
| cgd4_2500 |          |          |          |          |
| 2h        | 0.00E+00 | 0.00E+00 | 2.12E-09 | 0.00E+00 |
| 6h        | 0.00E+00 | 2.13E-08 | 2.10E-08 | 0.00E+00 |
| 12h       | 2.53E-10 | 0.00E+00 | 0.00E+00 | 2.21E-09 |
| 24h       | 5.35E-10 | 3.36E-09 | 1.60E-08 | 7.08E-09 |
| 36h       | 3.24E-08 | 1.75E-08 | 4.24E-08 | 8.46E-08 |
| 48h       | 2.83E-08 | 3.12E-08 | 1.79E-07 | 2.24E-07 |
| 72h       | 1.32E-07 | 6.54E-08 | 3.44E-07 | 8.41E-08 |
| cgd4_2510 |          |          |          |          |
| 2h        | 9.23E-07 | 6.37E-07 | 6.82E-06 | 4.37E-06 |
| 6h        | 1.45E-07 | 1.41E-07 | 7.53E-07 | 3.76E-07 |
| 12h       | 1.13E-05 | 6.09E-06 | 2.32E-05 | 0.00E+00 |
| 24h       | 9.17E-07 | 1.43E-06 | 1.90E-05 | 1.25E-05 |
| 36h       | 4.10E-06 | 1.83E-06 | 1.74E-05 | 4.13E-05 |
| 48h       | 9.37E-07 | 1.12E-06 | 4.46E-06 | 1.07E-05 |
| 72h       | 1.01E-06 | 2.52E-06 | 4.43E-06 | 2.31E-06 |
| cgd4_2520 |          |          |          |          |

|     |           |          |          |          |
|-----|-----------|----------|----------|----------|
| 2h  | 4.12E-07  | 2.02E-07 | 1.20E-06 | 1.13E-06 |
| 6h  | 1.98E-07  | 3.59E-07 | 9.59E-07 | 4.08E-07 |
| 12h | 5.03E-06  | 2.02E-06 | 3.49E-06 | 1.53E-05 |
| 24h | 4.07E-07  | 3.04E-07 | 1.02E-06 | 1.88E-06 |
| 36h | 5.66E-07  | 2.90E-07 | 2.64E-06 | 5.04E-06 |
| 48h | 2.21E-07  | 1.17E-07 | 4.23E-07 | 1.12E-06 |
| 72h | 1.22E-07  | 1.74E-07 | 5.84E-07 | 1.68E-07 |
|     | cgd4_2550 |          |          |          |
| 2h  | 1.09E-06  | 4.93E-06 | 4.21E-06 | 5.40E-04 |
| 6h  | 7.78E-05  | 8.18E-05 | 2.52E-04 | 3.26E-03 |
| 12h | 1.76E-05  | 1.23E-05 | 9.59E-05 | 2.43E-05 |
| 24h | 1.95E-05  | 1.39E-05 | 2.13E-04 | 2.61E-04 |
| 36h | 6.73E-05  | 2.71E-05 | 1.29E-04 | 1.37E-04 |
| 48h | 3.57E-05  | 2.20E-05 | 4.89E-05 | 1.89E-04 |
| 72h | 1.29E-05  | 1.84E-05 | 7.25E-05 | 1.93E-05 |
|     | cgd4_2560 |          |          |          |
| 2h  | 1.79E-08  | 6.32E-09 | 3.63E-08 | 1.77E-07 |
| 6h  | 0.00E+00  | 1.02E-09 | 0.00E+00 | 0.00E+00 |
| 12h | 1.89E-06  | 4.81E-07 | 3.34E-06 | 9.65E-06 |
| 24h | 3.12E-07  | 1.63E-07 | 5.38E-07 | 1.01E-06 |
| 36h | 3.24E-07  | 9.89E-08 | 2.45E-06 | 1.91E-06 |
| 48h | 2.26E-07  | 9.00E-08 | 6.72E-07 | 1.94E-06 |
| 72h | 1.33E-07  | 1.17E-07 | 5.02E-07 | 2.92E-07 |
|     | cgd4_2570 |          |          |          |
| 2h  | 6.46E-06  | 4.33E-06 | 1.51E-05 | 3.10E-05 |
| 6h  | 4.98E-07  | 3.65E-07 | 1.76E-06 | 5.64E-07 |
| 12h | 3.80E-06  | 2.48E-06 | 2.05E-05 | 3.68E-05 |
| 24h | 2.11E-06  | 6.85E-07 | 3.76E-06 | 7.96E-06 |
| 36h | 1.07E-06  | 1.65E-06 | 9.95E-06 | 5.65E-06 |
| 48h | 8.37E-07  | 3.94E-07 | 1.70E-06 | 3.95E-06 |
| 72h | 3.26E-07  | 4.92E-07 | 5.11E-06 | 4.99E-07 |
|     | cgd4_2580 |          |          |          |
| 2h  | 1.18E-07  | 4.61E-08 | 4.18E-07 | 3.63E-07 |
| 6h  | 2.05E-07  | 7.02E-07 | 2.37E-06 | 2.09E-06 |
| 12h | 5.96E-06  | 3.80E-08 | 1.19E-07 | 1.61E-07 |
| 24h | 1.12E-07  | 2.28E-07 | 7.00E-07 | 8.57E-07 |
| 36h | 2.73E-07  | 1.48E-07 | 1.03E-06 | 2.83E-07 |
| 48h | 1.17E-07  | 3.63E-07 | 8.64E-07 | 6.35E-07 |
| 72h | 4.23E-08  | 1.61E-08 | 0.00E+00 | 5.34E-08 |
|     | cgd4_2600 |          |          |          |
| 2h  | 4.94E-06  | 6.29E-06 | 3.04E-05 | 3.34E-06 |
| 6h  | 1.26E-07  | 1.30E-06 | 1.95E-06 | 1.73E-07 |
| 12h | 4.81E-04  | 4.22E-04 | 4.72E-04 | 9.56E-04 |
| 24h | 7.59E-05  | 5.31E-05 | 1.61E-04 | 1.94E-04 |
| 36h | 9.56E-05  | 5.63E-05 | 5.29E-04 | 2.72E-04 |
| 48h | 6.88E-05  | 1.32E-04 | 1.89E-04 | 2.12E-04 |
| 72h | 9.58E-06  | 4.99E-05 | 1.85E-05 | 2.12E-05 |
|     | cgd4_2610 |          |          |          |
| 2h  | 6.64E-07  | 3.85E-08 | 8.73E-09 | 4.16E-07 |
| 6h  | 0.00E+00  | 0.00E+00 | 1.08E-07 | 3.53E-08 |
| 12h | 1.48E-06  | 1.72E-06 | 3.03E-06 | 6.95E-06 |
| 24h | 4.84E-07  | 3.79E-07 | 5.32E-07 | 4.32E-07 |
| 36h | 3.94E-07  | 1.08E-06 | 4.08E-06 | 1.95E-06 |



|     |           |          |          |          |
|-----|-----------|----------|----------|----------|
| 48h | 1.73E-07  | 4.41E-07 | 8.47E-07 | 1.11E-06 |
| 72h | 0.00E+00  | 2.73E-07 | 3.71E-07 | 1.28E-07 |
|     | cgd4_2620 |          |          |          |
| 2h  | 2.72E-05  | 2.19E-05 | 9.37E-05 | 1.22E-05 |
| 6h  | 2.14E-05  | 2.26E-05 | 4.75E-05 | 8.01E-05 |
| 12h | 1.56E-05  | 3.58E-06 | 3.45E-05 | 7.51E-05 |
| 24h | 1.41E-05  | 1.68E-05 | 1.79E-05 | 3.70E-05 |
| 36h | 8.97E-06  | 1.18E-05 | 5.67E-05 | 2.91E-05 |
| 48h | 5.32E-06  | 8.31E-06 | 1.43E-05 | 1.68E-05 |
| 72h | 1.10E-04  | 7.74E-06 | 7.62E-06 | 3.33E-06 |
|     | cgd4_2630 |          |          |          |
| 2h  | 1.53E-05  | 2.46E-06 | 1.78E-05 | 1.29E-05 |
| 6h  | 7.26E-07  | 1.35E-06 | 3.95E-06 | 4.56E-06 |
| 12h | 2.26E-06  | 1.82E-07 | 1.10E-05 | 1.96E-05 |
| 24h | 1.82E-06  | 1.87E-06 | 4.41E-06 | 4.55E-06 |
| 36h | 1.89E-06  | 7.85E-04 | 6.50E-06 | 4.39E-06 |
| 48h | 7.22E-07  | 6.16E-07 | 1.80E-06 | 2.47E-06 |
| 72h | 2.40E-07  | 5.33E-07 | 6.80E-07 | 7.57E-07 |
|     | cgd4_2640 |          |          |          |
| 2h  | 3.86E-07  | 4.50E-07 | 3.93E-06 | 5.67E-07 |
| 6h  | 2.46E-08  | 1.48E-07 | 1.06E-07 | 1.55E-07 |
| 12h | 3.59E-07  | 2.86E-08 | 1.41E-06 | 2.35E-06 |
| 24h | 1.91E-07  | 2.13E-07 | 2.90E-07 | 4.44E-07 |
| 36h | 3.97E-07  | 2.06E-07 | 1.15E-06 | 5.92E-07 |
| 48h | 2.06E-07  | 1.65E-07 | 3.33E-07 | 3.68E-07 |
| 72h | 7.40E-08  | 1.26E-07 | 2.12E-07 | 2.14E-07 |
|     | cgd4_2650 |          |          |          |
| 2h  | 7.09E-08  | 0.00E+00 | 2.36E-07 | 3.05E-07 |
| 6h  | 2.47E-08  | 6.91E-08 | 1.32E-07 | 6.86E-08 |
| 12h | 1.62E-08  | 3.02E-09 | 1.24E-07 | 3.96E-07 |
| 24h | 5.32E-08  | 4.69E-08 | 8.57E-08 | 1.88E-07 |
| 36h | 7.49E-08  | 8.05E-08 | 3.87E-07 | 1.86E-07 |
| 48h | 4.80E-08  | 3.04E-08 | 1.12E-07 | 1.31E-07 |
| 72h | 1.39E-08  | 4.65E-08 | 4.80E-08 | 4.58E-08 |
|     | cgd4_2660 |          |          |          |
| 2h  | 4.08E-07  | 3.58E-08 | 5.50E-07 | 3.58E-07 |
| 6h  | 5.40E-08  | 1.93E-07 | 5.08E-07 | 3.09E-07 |
| 12h | 1.43E-09  | 0.00E+00 | 3.50E-08 | 2.78E-07 |
| 24h | 3.07E-08  | 1.10E-08 | 1.05E-07 | 1.49E-07 |
| 36h | 2.76E-08  | 4.95E-08 | 1.73E-07 | 8.23E-08 |
| 48h | 3.08E-08  | 1.79E-08 | 1.20E-07 | 2.30E-07 |
| 72h | 1.05E-08  | 2.60E-08 | 3.77E-08 | 4.22E-09 |
|     | cgd4_2670 |          |          |          |
| 2h  | 4.88E-07  | 5.96E-07 | 1.23E-06 | 1.32E-07 |
| 6h  | 5.81E-07  | 6.05E-07 | 3.58E-06 | 2.59E-06 |
| 12h | 2.72E-08  | 1.45E-08 | 3.15E-07 | 8.44E-07 |
| 24h | 1.40E-07  | 4.80E-08 | 1.21E-06 | 2.11E-06 |
| 36h | 1.94E-07  | 2.78E-07 | 1.19E-06 | 8.10E-07 |
| 48h | 2.16E-07  | 2.25E-07 | 1.28E-06 | 1.51E-06 |
| 72h | 2.09E-08  | 2.30E-07 | 4.22E-08 | 4.42E-08 |
|     | cgd4_2690 |          |          |          |
| 2h  | 4.37E-06  | 0.00E+00 | 0.00E+00 | 0.00E+00 |
| 6h  | 5.39E-04  | 2.57E-03 | 3.04E-03 | 2.10E-03 |

|     |           |          |          |          |
|-----|-----------|----------|----------|----------|
| 12h | 2.10E-05  | 2.18E-06 | 1.85E-04 | 8.70E-04 |
| 24h | 1.30E-04  | 2.20E-04 | 1.03E-03 | 3.12E-03 |
| 36h | 2.62E-04  | 3.21E-04 | 6.77E-04 | 4.72E-04 |
| 48h | 1.97E-04  | 3.00E-04 | 3.76E-04 | 7.33E-04 |
| 72h | 3.57E-05  | 1.50E-04 | 1.66E-05 | 3.21E-05 |
|     | cgd4_2700 |          |          |          |
| 2h  | 4.58E-05  | 6.49E-04 | 8.65E-05 | 6.54E-06 |
| 6h  | 5.84E-05  | 3.08E-04 | 4.01E-04 | 2.68E-04 |
| 12h | 6.59E-06  | 3.43E-06 | 5.01E-05 | 1.17E-04 |
| 24h | 1.44E-05  | 2.45E-05 | 8.88E-05 | 2.34E-04 |
| 36h | 4.58E-05  | 9.52E-05 | 1.28E-04 | 5.34E-05 |
| 48h | 5.10E-05  | 1.31E-04 | 9.74E-05 | 1.40E-04 |
| 72h | 7.05E-06  | 4.96E-05 | 1.96E-05 | 1.24E-05 |
|     | cgd4_2710 |          |          |          |
| 2h  | 2.50E-05  | 1.03E-03 | 1.58E-04 | 4.51E-05 |
| 6h  | 8.82E-05  | 0.00E+00 | 6.48E-04 | 3.53E-04 |
| 12h | 5.95E-06  | 0.00E+00 | 1.34E-04 | 1.48E-04 |
| 24h | 2.09E-05  | 0.00E+00 | 1.91E-04 | 2.25E-04 |
| 36h | 7.89E-05  | 0.00E+00 | 3.44E-04 | 1.02E-04 |
| 48h | 9.71E-05  | 0.00E+00 | 1.38E-04 | 1.54E-04 |
| 72h | 5.92E-05  | 0.00E+00 | 4.15E-04 | 7.33E-05 |
|     | cgd4_2720 |          |          |          |
| 2h  | 2.30E-09  | 1.01E-08 | 1.65E-07 | 0.00E+00 |
| 6h  | 2.54E-09  | 3.97E-08 | 1.68E-08 | 1.29E-08 |
| 12h | 4.31E-09  | 0.00E+00 | 1.13E-08 | 3.75E-08 |
| 24h | 1.14E-08  | 1.66E-08 | 9.58E-08 | 3.08E-08 |
| 36h | 6.81E-08  | 2.90E-08 | 3.09E-07 | 2.44E-07 |
| 48h | 3.05E-06  | 2.92E-06 | 2.68E-06 | 4.65E-06 |
| 72h | 1.16E-06  | 1.05E-06 | 9.17E-06 | 4.06E-06 |
|     | cgd4_2740 |          |          |          |
| 2h  | 1.23E-06  | 4.27E-07 | 4.90E-06 | 3.67E-06 |
| 6h  | 2.20E-07  | 1.51E-07 | 9.71E-07 | 9.24E-07 |
| 12h | 4.31E-07  | 3.24E-07 | 5.47E-07 | 3.38E-06 |
| 24h | 7.55E-07  | 1.29E-06 | 1.57E-06 | 1.14E-06 |
| 36h | 5.48E-07  | 1.92E-07 | 2.10E-06 | 1.63E-06 |
| 48h | 6.74E-07  | 3.85E-07 | 4.20E-07 | 6.49E-07 |
| 72h | 2.85E-07  | 3.07E-07 | 7.39E-07 | 2.69E-07 |
|     | cgd4_2750 |          |          |          |
| 2h  | 6.79E-06  | 5.44E-06 | 4.47E-05 | 1.83E-05 |
| 6h  | 9.10E-06  | 9.52E-06 | 3.81E-06 | 4.36E-06 |
| 12h | 2.81E-06  | 2.68E-06 | 1.56E-05 | 3.17E-05 |
| 24h | 2.35E-05  | 1.56E-05 | 6.79E-06 | 5.14E-06 |
| 36h | 1.73E-06  | 2.13E-06 | 1.58E-05 | 8.88E-06 |
| 48h | 2.59E-06  | 1.82E-06 | 3.24E-06 | 2.07E-06 |
| 72h | 9.92E-07  | 1.08E-06 | 2.29E-06 | 1.36E-06 |
|     | cgd4_2760 |          |          |          |
| 2h  | 5.65E-08  | 1.90E-09 | 2.69E-07 | 1.98E-07 |
| 6h  | 0.00E+00  | 3.49E-08 | 3.32E-08 | 1.09E-07 |
| 12h | 5.13E-10  | 6.68E-09 | 1.03E-08 | 1.15E-07 |
| 24h | 3.22E-08  | 5.55E-08 | 7.91E-08 | 1.27E-07 |
| 36h | 3.75E-08  | 5.91E-08 | 3.91E-07 | 4.14E-07 |
| 48h | 7.16E-08  | 3.99E-08 | 2.38E-07 | 3.53E-07 |
| 72h | 7.56E-08  | 2.65E-07 | 3.70E-07 | 1.26E-07 |

|     |           |          |          |          |
|-----|-----------|----------|----------|----------|
|     | cgd4_2770 |          |          |          |
| 2h  | 1.81E-06  | 8.94E-07 | 2.59E-05 | 1.43E-05 |
| 6h  | 2.04E-06  | 2.64E-06 | 2.92E-06 | 3.21E-06 |
| 12h | 8.61E-07  | 5.48E-07 | 9.40E-06 | 2.99E-05 |
| 24h | 2.46E-06  | 2.90E-06 | 5.81E-06 | 5.06E-06 |
| 36h | 1.43E-06  | 1.45E-06 | 4.63E-06 | 4.55E-06 |
| 48h | 6.76E-07  | 4.37E-07 | 1.63E-06 | 1.85E-06 |
| 72h | 3.98E-07  | 6.07E-07 | 7.27E-07 | 3.76E-07 |
|     | cgd4_2780 |          |          |          |
| 2h  | 2.13E-05  | 1.38E-06 | 1.29E-05 | 1.02E-06 |
| 6h  | 5.57E-04  | 6.55E-04 | 1.27E-03 | 4.02E-03 |
| 12h | 8.73E-05  | 2.16E-05 | 1.41E-04 | 4.44E-04 |
| 24h | 1.73E-04  | 1.65E-04 | 7.31E-04 | 1.99E-03 |
| 36h | 5.70E-04  | 5.62E-04 | 1.15E-03 | 1.95E-03 |
| 48h | 1.73E-04  | 3.93E-04 | 7.51E-04 | 1.46E-03 |
| 72h | 7.35E-05  | 1.13E-04 | 1.02E-04 | 6.52E-05 |
|     | cgd4_2790 |          |          |          |
| 2h  | 2.91E-09  | 2.54E-09 | 8.03E-09 | 1.26E-08 |
| 6h  | 3.78E-07  | 3.83E-07 | 1.43E-06 | 1.97E-06 |
| 12h | 6.80E-08  | 4.58E-08 | 1.06E-07 | 9.72E-07 |
| 24h | 8.64E-08  | 6.67E-08 | 1.75E-06 | 2.36E-06 |
| 36h | 4.32E-07  | 5.94E-07 | 1.66E-06 | 1.07E-06 |
| 48h | 1.58E-07  | 3.61E-07 | 1.07E-06 | 1.10E-06 |
| 72h | 9.74E-08  | 1.46E-07 | 7.19E-08 | 2.65E-08 |
|     | cgd4_2810 |          |          |          |
| 2h  | 7.50E-05  | 8.38E-05 | 4.07E-04 | 8.66E-05 |
| 6h  | 3.34E-04  | 7.60E-04 | 1.89E-03 | 3.30E-03 |
| 12h | 1.01E-05  | 1.57E-07 | 6.71E-05 | 2.99E-04 |
| 24h | 9.36E-05  | 2.23E-04 | 6.78E-04 | 2.07E-03 |
| 36h | 1.73E-04  | 1.09E-04 | 5.82E-04 | 8.24E-04 |
| 48h | 1.66E-04  | 1.82E-04 | 2.94E-04 | 5.48E-04 |
| 72h | 2.77E-05  | 3.28E-05 | 4.89E-05 | 7.89E-06 |
|     | cgd4_2820 |          |          |          |
| 2h  | 0.00E+00  | 0.00E+00 | 0.00E+00 | 0.00E+00 |
| 6h  | 1.84E-08  | 2.24E-08 | 1.11E-08 | 5.95E-08 |
| 12h | 2.95E-07  | 5.31E-07 | 5.40E-07 | 2.89E-06 |
| 24h | 7.66E-08  | 3.68E-08 | 3.80E-07 | 2.08E-07 |
| 36h | 5.16E-08  | 5.00E-08 | 6.39E-07 | 4.62E-07 |
| 48h | 7.26E-08  | 6.63E-08 | 2.14E-07 | 3.97E-07 |
| 72h | 1.48E-08  | 1.66E-08 | 1.35E-08 | 1.71E-08 |
|     | cgd4_2830 |          |          |          |
| 2h  | 2.04E-07  | 2.70E-07 | 2.12E-06 | 1.08E-06 |
| 6h  | 2.92E-07  | 4.13E-07 | 1.35E-06 | 1.84E-06 |
| 12h | 1.71E-07  | 1.69E-07 | 2.97E-07 | 8.55E-07 |
| 24h | 1.20E-07  | 8.99E-08 | 1.42E-06 | 3.18E-06 |
| 36h | 4.20E-07  | 2.10E-07 | 2.98E-07 | 2.62E-07 |
| 48h | 3.34E-07  | 2.85E-07 | 3.61E-07 | 2.65E-07 |
| 72h | 7.22E-08  | 4.31E-08 | 2.28E-08 | 2.51E-08 |
|     | cgd4_2840 |          |          |          |
| 2h  | 3.20E-07  | 9.43E-08 | 1.37E-06 | 2.25E-07 |
| 6h  | 2.25E-07  | 1.01E-07 | 5.94E-07 | 1.11E-06 |
| 12h | 1.38E-07  | 1.94E-07 | 3.25E-07 | 5.72E-07 |
| 24h | 1.82E-07  | 2.74E-07 | 6.39E-07 | 1.08E-06 |

|     |           |          |          |          |
|-----|-----------|----------|----------|----------|
| 36h | 4.34E-07  | 4.42E-07 | 5.88E-07 | 3.59E-07 |
| 48h | 4.66E-07  | 5.14E-07 | 6.20E-07 | 8.68E-07 |
| 72h | 1.73E-07  | 1.15E-07 | 1.48E-07 | 2.97E-08 |
|     | cgd4_2850 |          |          |          |
| 2h  | 5.22E-08  | 8.60E-09 | 3.17E-07 | 4.20E-08 |
| 6h  | 2.55E-09  | 7.93E-09 | 4.73E-08 | 1.22E-08 |
| 12h | 1.90E-08  | 2.95E-08 | 4.91E-08 | 5.83E-08 |
| 24h | 2.29E-08  | 1.94E-08 | 1.10E-07 | 5.85E-08 |
| 36h | 7.38E-08  | 6.09E-08 | 1.93E-07 | 6.76E-08 |
| 48h | 1.08E-07  | 6.25E-08 | 9.99E-08 | 8.73E-08 |
| 72h | 4.02E-08  | 8.82E-08 | 1.40E-07 | 7.35E-08 |
|     | cgd4_2860 |          |          |          |
| 2h  | 5.63E-06  | 2.62E-06 | 9.55E-06 | 3.46E-05 |
| 6h  | 4.07E-06  | 1.97E-05 | 1.72E-05 | 4.65E-05 |
| 12h | 1.37E-04  | 4.04E-04 | 3.49E-04 | 9.19E-04 |
| 24h | 7.25E-05  | 1.59E-04 | 3.80E-04 | 6.67E-04 |
| 36h | 1.07E-04  | 2.03E-04 | 7.31E-04 | 7.79E-04 |
| 48h | 8.17E-05  | 1.77E-04 | 3.52E-04 | 1.13E-03 |
| 72h | 2.13E-05  | 1.92E-05 | 5.94E-05 | 2.51E-05 |
|     | cgd4_2870 |          |          |          |
| 2h  | 4.95E-07  | 4.05E-07 | 2.18E-06 | 6.02E-07 |
| 6h  | 9.28E-07  | 1.03E-06 | 1.31E-06 | 7.68E-07 |
| 12h | 2.71E-07  | 1.27E-07 | 8.13E-07 | 2.62E-06 |
| 24h | 3.96E-07  | 3.23E-07 | 5.17E-07 | 1.77E-06 |
| 36h | 1.83E-07  | 1.72E-07 | 1.53E-06 | 8.19E-07 |
| 48h | 1.03E-07  | 9.15E-08 | 3.64E-07 | 9.84E-07 |
| 72h | 1.19E-07  | 1.81E-07 | 1.07E-06 | 1.26E-07 |
|     | cgd4_2880 |          |          |          |
| 2h  | 3.90E-08  | 6.55E-08 | 7.43E-07 | 1.13E-07 |
| 6h  | 5.83E-07  | 2.33E-07 | 5.67E-07 | 2.77E-06 |
| 12h | 9.98E-08  | 1.22E-07 | 5.59E-07 | 5.88E-07 |
| 24h | 1.25E-07  | 3.23E-08 | 2.80E-07 | 8.95E-07 |
| 36h | 6.86E-08  | 1.25E-07 | 1.17E-06 | 4.93E-07 |
| 48h | 3.11E-08  | 1.81E-08 | 2.08E-07 | 2.92E-07 |
| 72h | 2.42E-08  | 2.70E-08 | 1.98E-07 | 3.72E-08 |
|     | cgd4_2890 |          |          |          |
| 2h  | 7.47E-05  | 2.66E-04 | 1.30E-03 | 7.14E-05 |
| 6h  | 1.37E-04  | 3.42E-04 | 1.22E-03 | 1.36E-03 |
| 12h | 1.70E-04  | 1.76E-04 | 2.67E-04 | 8.73E-04 |
| 24h | 3.47E-05  | 8.00E-05 | 3.65E-04 | 1.26E-03 |
| 36h | 2.00E-04  | 1.87E-04 | 6.62E-04 | 1.01E-03 |
| 48h | 4.43E-05  | 1.16E-04 | 6.38E-04 | 9.18E-04 |
| 72h | 4.37E-05  | 1.09E-04 | 2.42E-04 | 1.47E-04 |
|     | cgd4_2920 |          |          |          |
| 2h  | 0.00E+00  | 0.00E+00 | 1.23E-08 | 9.45E-09 |
| 6h  | 1.75E-08  | 2.16E-09 | 9.59E-10 | 9.69E-08 |
| 12h | 7.49E-07  | 9.68E-06 | 3.79E-06 | 3.97E-06 |
| 24h | 8.76E-08  | 1.09E-07 | 3.28E-07 | 5.84E-07 |
| 36h | 5.88E-07  | 7.73E-07 | 7.93E-06 | 3.85E-06 |
| 48h | 7.26E-08  | 1.45E-07 | 5.77E-07 | 8.05E-07 |
| 72h | 1.16E-07  | 1.03E-07 | 7.41E-07 | 3.86E-07 |
|     | cgd4_2930 |          |          |          |
| 2h  | 0.00E+00  | 0.00E+00 | 0.00E+00 | 0.00E+00 |

|     |           |          |          |          |
|-----|-----------|----------|----------|----------|
| 6h  | 0.00E+00  | 0.00E+00 | 0.00E+00 | 4.93E-09 |
| 12h | 6.85E-08  | 1.10E-07 | 2.19E-07 | 2.14E-07 |
| 24h | 1.06E-08  | 1.03E-08 | 3.48E-08 | 1.24E-07 |
| 36h | 1.29E-07  | 1.16E-07 | 9.77E-07 | 8.31E-07 |
| 48h | 1.25E-08  | 3.87E-08 | 1.06E-07 | 1.63E-07 |
| 72h | 1.35E-08  | 4.10E-09 | 4.30E-08 | 7.95E-08 |
|     | cgd4_2940 |          |          |          |
| 2h  | 5.54E-08  | 4.88E-08 | 1.54E-07 | 7.59E-08 |
| 6h  | 6.61E-08  | 4.18E-08 | 1.48E-07 | 7.71E-08 |
| 12h | 8.99E-08  | 3.44E-08 | 7.46E-08 | 1.18E-07 |
| 24h | 1.10E-08  | 1.93E-08 | 1.44E-07 | 1.09E-07 |
| 36h | 7.93E-08  | 6.50E-08 | 2.74E-07 | 3.49E-07 |
| 48h | 4.15E-08  | 4.92E-08 | 2.59E-07 | 2.22E-07 |
| 72h | 2.01E-08  | 2.00E-08 | 3.44E-08 | 3.52E-08 |
|     | cgd4_2960 |          |          |          |
| 2h  | 1.69E-07  | 8.02E-08 | 8.31E-07 | 4.27E-08 |
| 6h  | 9.64E-08  | 2.15E-07 | 8.87E-07 | 6.91E-07 |
| 12h | 2.06E-07  | 2.35E-07 | 5.67E-07 | 2.41E-06 |
| 24h | 7.33E-08  | 8.89E-08 | 3.79E-07 | 4.81E-07 |
| 36h | 2.44E-07  | 1.49E-07 | 6.73E-07 | 8.24E-07 |
| 48h | 9.78E-08  | 9.51E-08 | 4.93E-07 | 4.29E-07 |
| 72h | 3.42E-08  | 2.56E-08 | 7.23E-08 | 9.43E-08 |
|     | cgd4_2980 |          |          |          |
| 2h  | 1.79E-06  | 3.30E-06 | 5.90E-05 | 1.08E-05 |
| 6h  | 1.65E-06  | 1.58E-06 | 1.05E-05 | 9.97E-06 |
| 12h | 1.97E-04  | 2.88E-04 | 5.22E-04 | 1.16E-03 |
| 24h | 1.07E-05  | 3.91E-05 | 4.86E-05 | 6.85E-05 |
| 36h | 2.01E-05  | 1.98E-05 | 1.29E-04 | 2.02E-04 |
| 48h | 1.13E-05  | 7.09E-06 | 5.17E-05 | 9.96E-05 |
| 72h | 2.48E-06  | 2.77E-06 | 1.04E-05 | 1.35E-05 |
|     | cgd4_3010 |          |          |          |
| 2h  | 5.31E-06  | 4.64E-06 | 3.17E-05 | 2.05E-05 |
| 6h  | 2.19E-06  | 3.79E-06 | 1.37E-05 | 1.08E-05 |
| 12h | 1.22E-05  | 1.40E-05 | 1.87E-05 | 8.73E-05 |
| 24h | 3.95E-06  | 8.08E-06 | 2.24E-05 | 2.36E-05 |
| 36h | 2.88E-06  | 2.33E-06 | 5.92E-06 | 1.08E-05 |
| 48h | 1.99E-06  | 1.82E-06 | 8.40E-06 | 1.62E-05 |
| 72h | 5.25E-07  | 3.39E-07 | 6.41E-07 | 8.38E-07 |
|     | cgd4_3030 |          |          |          |
| 2h  | 7.62E-07  | 5.24E-07 | 3.41E-06 | 4.35E-06 |
| 6h  | 5.49E-07  | 1.66E-06 | 4.85E-06 | 2.20E-06 |
| 12h | 4.06E-07  | 2.97E-07 | 9.66E-07 | 5.26E-06 |
| 24h | 4.27E-07  | 4.26E-07 | 1.59E-06 | 5.29E-06 |
| 36h | 5.62E-07  | 3.09E-07 | 7.91E-07 | 1.59E-06 |
| 48h | 2.77E-07  | 2.47E-07 | 5.72E-07 | 1.95E-06 |
| 72h | 1.41E-07  | 3.54E-08 | 2.23E-07 | 1.58E-07 |
|     | cgd4_3040 |          |          |          |
| 2h  | 2.27E-04  | 1.12E-03 | 7.48E-04 | 6.18E-04 |
| 6h  | 1.38E-04  | 2.02E-03 | 2.25E-03 | 5.85E-04 |
| 12h | 4.56E-05  | 4.04E-04 | 1.09E-03 | 3.11E-04 |
| 24h | 8.07E-05  | 1.79E-04 | 8.02E-04 | 6.46E-04 |
| 36h | 1.41E-04  | 3.50E-04 | 1.15E-03 | 6.60E-04 |
| 48h | 5.03E-05  | 8.78E-05 | 5.33E-04 | 5.61E-04 |

|     |           |          |          |          |
|-----|-----------|----------|----------|----------|
| 72h | 3.48E-05  | 8.43E-05 | 1.39E-03 | 1.12E-04 |
|     | cgd4_3050 |          |          |          |
| 2h  | 1.99E-06  | 2.80E-06 | 3.44E-06 | 8.98E-06 |
| 6h  | 3.49E-06  | 1.71E-06 | 2.95E-06 | 5.18E-06 |
| 12h | 1.95E-06  | 1.71E-06 | 4.19E-06 | 1.98E-05 |
| 24h | 3.03E-06  | 4.11E-06 | 1.98E-05 | 6.38E-06 |
| 36h | 1.00E-06  | 3.87E-07 | 1.90E-06 | 3.83E-06 |
| 48h | 7.32E-07  | 2.74E-06 | 4.38E-06 | 1.02E-06 |
| 72h | 2.55E-07  | 2.75E-07 | 9.02E-07 | 4.22E-07 |
|     | cgd4_3070 |          |          |          |
| 2h  | 0.00E+00  | 0.00E+00 | 1.17E-07 | 0.00E+00 |
| 6h  | 6.42E-09  | 1.46E-08 | 1.42E-07 | 9.70E-07 |
| 12h | 1.24E-05  | 1.91E-05 | 2.40E-05 | 1.00E-04 |
| 24h | 2.46E-06  | 2.04E-06 | 1.39E-05 | 1.92E-05 |
| 36h | 9.96E-06  | 3.36E-06 | 7.85E-05 | 8.03E-05 |
| 48h | 6.11E-07  | 4.94E-06 | 2.22E-05 | 1.48E-05 |
| 72h | 4.02E-06  | 1.93E-06 | 2.04E-05 | 3.61E-06 |
|     | cgd4_3090 |          |          |          |
| 2h  | 1.50E-07  | 1.36E-08 | 1.13E-07 | 1.85E-07 |
| 6h  | 2.41E-08  | 5.98E-08 | 6.73E-08 | 1.37E-08 |
| 12h | 9.83E-09  | 3.16E-09 | 8.89E-08 | 1.80E-07 |
| 24h | 3.31E-08  | 3.57E-08 | 3.05E-07 | 1.45E-07 |
| 36h | 2.41E-07  | 5.14E-08 | 3.72E-07 | 9.90E-07 |
| 48h | 2.14E-06  | 6.66E-06 | 1.22E-05 | 7.38E-06 |
| 72h | 1.27E-06  | 4.06E-07 | 2.13E-06 | 1.52E-06 |
|     | cgd4_3100 |          |          |          |
| 2h  | 0.00E+00  | 0.00E+00 | 3.18E-09 | 0.00E+00 |
| 6h  | 1.56E-08  | 2.00E-08 | 5.88E-08 | 1.20E-07 |
| 12h | 1.93E-07  | 6.35E-08 | 3.26E-07 | 1.48E-06 |
| 24h | 1.31E-08  | 4.70E-08 | 4.26E-07 | 2.77E-07 |
| 36h | 5.52E-07  | 3.87E-08 | 1.30E-06 | 1.43E-06 |
| 48h | 2.77E-08  | 5.37E-08 | 2.89E-07 | 1.93E-07 |
| 72h | 4.91E-08  | 1.74E-08 | 3.15E-07 | 8.05E-08 |
|     | cgd4_3110 |          |          |          |
| 2h  | 7.40E-09  | 0.00E+00 | 8.68E-09 | 4.15E-08 |
| 6h  | 0.00E+00  | 2.57E-09 | 5.33E-09 | 1.89E-09 |
| 12h | 2.29E-07  | 3.99E-08 | 4.75E-07 | 4.14E-06 |
| 24h | 2.43E-08  | 2.65E-08 | 3.03E-07 | 1.84E-07 |
| 36h | 2.32E-07  | 9.46E-08 | 1.53E-06 | 1.75E-06 |
| 48h | 8.52E-08  | 7.94E-08 | 3.81E-07 | 6.02E-07 |
| 72h | 3.39E-08  | 3.80E-08 | 3.38E-07 | 7.54E-08 |
|     | cgd4_3120 |          |          |          |
| 2h  | 0.00E+00  | 3.44E-07 | 8.50E-07 | 0.00E+00 |
| 6h  | 3.51E-07  | 4.84E-07 | 1.76E-06 | 6.52E-06 |
| 12h | 5.82E-07  | 1.96E-07 | 2.68E-06 | 1.70E-05 |
| 24h | 3.03E-07  | 2.54E-07 | 3.87E-06 | 9.67E-06 |
| 36h | 1.71E-06  | 7.25E-07 | 7.79E-06 | 1.02E-05 |
| 48h | 8.08E-07  | 3.84E-06 | 7.66E-06 | 5.57E-06 |
| 72h | 5.66E-07  | 8.63E-07 | 3.04E-06 | 1.26E-06 |
|     | cgd4_3150 |          |          |          |
| 2h  | 5.50E-09  | 7.80E-09 | 1.75E-08 | 1.63E-07 |
| 6h  | 1.31E-07  | 6.35E-07 | 2.61E-06 | 2.37E-06 |
| 12h | 3.21E-08  | 2.74E-08 | 7.02E-08 | 2.72E-07 |

|     |           |          |          |          |
|-----|-----------|----------|----------|----------|
| 24h | 2.09E-08  | 2.27E-08 | 6.61E-07 | 1.53E-06 |
| 36h | 4.10E-07  | 6.60E-08 | 1.11E-06 | 7.04E-07 |
| 48h | 1.19E-07  | 1.42E-07 | 5.70E-07 | 1.17E-06 |
| 72h | 1.02E-07  | 2.02E-07 | 9.95E-07 | 5.99E-08 |
|     | cgd4_3160 |          |          |          |
| 2h  | 2.13E-07  | 1.87E-07 | 3.97E-07 | 1.02E-06 |
| 6h  | 9.56E-07  | 1.20E-06 | 2.29E-06 | 5.80E-06 |
| 12h | 1.03E-07  | 6.62E-08 | 3.36E-07 | 1.05E-06 |
| 24h | 1.49E-07  | 6.59E-08 | 7.92E-07 | 3.05E-06 |
| 36h | 3.92E-07  | 2.30E-07 | 8.33E-07 | 9.66E-07 |
| 48h | 3.02E-07  | 1.78E-07 | 5.64E-07 | 1.31E-06 |
| 72h | 1.32E-07  | 3.74E-07 | 5.91E-07 | 1.50E-07 |
|     | cgd4_3180 |          |          |          |
| 2h  | 1.27E-06  | 4.40E-07 | 1.07E-06 | 4.30E-06 |
| 6h  | 9.25E-08  | 6.62E-08 | 4.26E-07 | 3.68E-07 |
| 12h | 5.07E-07  | 2.32E-07 | 7.29E-07 | 3.17E-06 |
| 24h | 3.43E-07  | 2.60E-07 | 3.79E-07 | 1.83E-06 |
| 36h | 4.28E-07  | 1.74E-07 | 1.01E-06 | 4.91E-07 |
| 48h | 2.22E-07  | 1.69E-07 | 6.32E-07 | 8.88E-07 |
| 72h | 6.76E-08  | 1.57E-07 | 7.74E-07 | 9.81E-08 |
|     | cgd4_3200 |          |          |          |
| 2h  | 7.07E-06  | 3.41E-05 | 1.15E-05 | 5.62E-06 |
| 6h  | 2.90E-06  | 4.16E-06 | 4.94E-06 | 9.36E-06 |
| 12h | 9.09E-07  | 3.75E-06 | 1.02E-05 | 9.92E+02 |
| 24h | 2.41E-06  | 1.33E-06 | 1.20E-05 | 1.53E-05 |
| 36h | 1.60E-06  | 1.94E-06 | 6.96E-06 | 2.53E-06 |
| 48h | 2.46E-06  | 1.69E-06 | 8.20E-06 | 5.81E-06 |
| 72h | 4.34E-07  | 2.06E-06 | 3.11E-06 | 3.15E-06 |
|     | cgd4_3210 |          |          |          |
| 2h  | 2.62E-07  | 2.17E-09 | 7.97E-09 | 0.00E+00 |
| 6h  | 1.12E-08  | 2.22E-08 | 9.99E-08 | 5.95E-08 |
| 12h | 7.98E-09  | 0.00E+00 | 3.23E-08 | 8.43E-08 |
| 24h | 2.79E-08  | 1.04E-08 | 9.21E-08 | 1.18E-07 |
| 36h | 4.43E-08  | 3.56E-07 | 2.46E-07 | 7.05E-08 |
| 48h | 1.01E-07  | 8.25E-08 | 3.02E-07 | 2.24E-07 |
| 72h | 8.08E-08  | 1.70E-07 | 5.74E-07 | 1.20E-07 |
|     | cgd4_3220 |          |          |          |
| 2h  | 6.46E-07  | 1.96E-07 | 6.18E-07 | 1.27E-06 |
| 6h  | 2.51E-06  | 3.99E-06 | 4.33E-06 | 3.62E-05 |
| 12h | 1.82E-04  | 1.14E-02 | 5.73E-04 | 6.71E-04 |
| 24h | 4.20E-05  | 6.61E-05 | 1.30E-04 | 1.61E-04 |
| 36h | 1.04E-04  | 9.58E-04 | 2.54E-03 | 2.62E-04 |
| 48h | 8.89E-05  | 2.60E-02 | 1.13E-03 | 3.74E-04 |
| 72h | 8.76E-05  | 0.00E+00 | 8.33E-04 | 2.32E-04 |
|     | cgd4_3230 |          |          |          |
| 2h  | 1.12E-06  | 9.18E-07 | 0.00E+00 | 1.87E-06 |
| 6h  | 3.98E-07  | 1.39E-05 | 1.58E-05 | 5.59E-06 |
| 12h | 9.87E-06  | 9.05E-06 | 9.50E-06 | 2.97E-05 |
| 24h | 6.26E-06  | 4.04E-06 | 5.30E-06 | 1.25E-05 |
| 36h | 1.91E-06  | 2.93E-06 | 8.82E-06 | 4.90E-06 |
| 48h | 3.54E-06  | 3.11E-06 | 5.23E-06 | 7.81E-06 |
| 72h | 1.00E-06  | 2.48E-06 | 3.68E-06 | 1.77E-06 |
|     | cgd4_3240 |          |          |          |

|     |           |          |          |          |
|-----|-----------|----------|----------|----------|
| 2h  | 0.00E+00  | 0.00E+00 | 1.09E-06 | 0.00E+00 |
| 6h  | 0.00E+00  | 2.25E-07 | 9.18E-08 | 0.00E+00 |
| 12h | 1.63E-06  | 2.25E-07 | 3.32E-06 | 6.19E-06 |
| 24h | 2.49E-06  | 1.34E-06 | 1.51E-06 | 2.89E-06 |
| 36h | 3.26E-06  | 1.55E-05 | 2.04E-05 | 1.37E-05 |
| 48h | 9.96E-05  | 2.49E-04 | 1.08E-04 | 2.62E-04 |
| 72h | 1.10E-05  | 1.35E-05 | 2.11E-05 | 3.03E-05 |
|     | cgd4_3250 |          |          |          |
| 2h  | 1.07E-06  | 3.39E-07 | 2.76E-06 | 2.14E-06 |
| 6h  | 1.11E-06  | 2.94E-07 | 5.49E-06 | 2.04E-06 |
| 12h | 2.75E-07  | 1.22E-07 | 2.83E-06 | 2.23E-06 |
| 24h | 1.72E-06  | 4.70E-07 | 7.19E-07 | 4.25E-06 |
| 36h | 1.37E-07  | 3.72E-07 | 1.36E-06 | 1.27E-06 |
| 48h | 3.58E-07  | 7.32E-08 | 3.57E-07 | 4.99E-07 |
| 72h | 1.29E-07  | 2.65E-07 | 2.83E-07 | 2.26E-07 |
|     | cgd4_3280 |          |          |          |
| 2h  | 4.42E-07  | 1.80E-07 | 8.73E-07 | 1.28E-06 |
| 6h  | 1.07E-08  | 1.30E-08 | 9.73E-08 | 3.27E-08 |
| 12h | 4.78E-06  | 1.12E-05 | 2.13E-05 | 2.25E-05 |
| 24h | 1.71E-06  | 6.06E-07 | 7.28E-07 | 1.79E-06 |
| 36h | 9.96E-07  | 1.90E-06 | 7.82E-06 | 6.35E-06 |
| 48h | 7.06E-07  | 8.73E-07 | 1.89E-06 | 1.75E-06 |
| 72h | 6.51E-07  | 7.77E-07 | 4.08E-06 | 1.18E-06 |
|     | cgd4_3290 |          |          |          |
| 2h  | 2.94E-07  | 0.00E+00 | 1.58E-08 | 0.00E+00 |
| 6h  | 0.00E+00  | 0.00E+00 | 5.78E-07 | 1.49E-06 |
| 12h | 7.91E-04  | 1.53E-03 | 5.89E-03 | 1.00E-02 |
| 24h | 5.67E-05  | 2.22E-04 | 5.89E-05 | 7.94E-04 |
| 36h | 9.09E-05  | 3.51E-04 | 1.72E-03 | 2.98E-03 |
| 48h | 2.29E-05  | 9.87E-05 | 1.67E-04 | 2.50E-04 |
| 72h | 1.51E-05  | 1.61E-05 | 3.26E-05 | 4.11E-05 |
|     | cgd4_3300 |          |          |          |
| 2h  | 0.00E+00  | 0.00E+00 | 2.13E-09 | 0.00E+00 |
| 6h  | 1.02E-09  | 5.29E-09 | 7.08E-08 | 9.38E-08 |
| 12h | 3.28E-06  | 7.06E-06 | 1.97E-05 | 1.88E-05 |
| 24h | 3.56E-07  | 3.47E-07 | 2.26E-07 | 2.16E-06 |
| 36h | 7.29E-07  | 1.49E-06 | 1.20E-05 | 1.26E-05 |
| 48h | 1.35E-07  | 4.06E-07 | 1.55E-06 | 1.84E-06 |
| 72h | 2.62E-07  | 6.89E-08 | 4.67E-07 | 4.40E-07 |
|     | cgd4_3310 |          |          |          |
| 2h  | 0.00E+00  | 0.00E+00 | 8.68E-09 | 0.00E+00 |
| 6h  | 1.07E-07  | 6.30E-08 | 8.49E-07 | 1.43E-06 |
| 12h | 2.65E-08  | 2.09E-09 | 7.46E-08 | 2.08E-07 |
| 24h | 4.08E-08  | 8.31E-08 | 1.29E-07 | 7.92E-07 |
| 36h | 3.49E-07  | 1.66E-07 | 1.05E-06 | 1.50E-06 |
| 48h | 1.54E-07  | 1.87E-07 | 6.37E-07 | 9.66E-07 |
| 72h | 3.69E-07  | 1.17E-07 | 6.37E-07 | 5.28E-07 |
|     | cgd4_3320 |          |          |          |
| 2h  | 1.00E-03  | 5.27E-04 | 8.91E-03 | 2.50E-03 |
| 6h  | 5.06E-04  | 1.26E-04 | 3.41E-03 | 3.89E-03 |
| 12h | 1.07E-03  | 2.66E-04 | 7.34E-03 | 4.36E-03 |
| 24h | 6.82E-04  | 4.08E-04 | 5.40E-04 | 2.70E-03 |
| 36h | 2.68E-04  | 2.51E-04 | 6.11E-04 | 1.02E-03 |



|     |           |          |          |          |
|-----|-----------|----------|----------|----------|
| 48h | 3.44E-04  | 4.56E-05 | 6.70E-04 | 5.01E-04 |
| 72h | 8.50E-04  | 1.41E-04 | 1.14E-03 | 2.56E-04 |
|     | cgd4_3330 |          |          |          |
| 2h  | 1.04E-06  | 7.47E-07 | 3.40E-06 | 1.68E-06 |
| 6h  | 4.28E-09  | 1.41E-10 | 1.35E-07 | 4.36E-09 |
| 12h | 8.74E-06  | 3.91E-06 | 3.54E-05 | 4.93E-05 |
| 24h | 4.94E-07  | 1.01E-06 | 4.16E-07 | 1.10E-06 |
| 36h | 7.60E-07  | 4.66E-07 | 5.68E-06 | 7.80E-06 |
| 48h | 8.70E-07  | 1.29E-06 | 3.50E-06 | 3.64E-06 |
| 72h | 6.00E-07  | 6.79E-08 | 2.28E-07 | 4.05E-07 |
|     | cgd4_3350 |          |          |          |
| 2h  | 0.00E+00  | 0.00E+00 | 0.00E+00 | 0.00E+00 |
| 6h  | 0.00E+00  | 0.00E+00 | 0.00E+00 | 0.00E+00 |
| 12h | 0.00E+00  | 0.00E+00 | 8.68E-09 | 0.00E+00 |
| 24h | 6.39E-11  | 2.29E-11 | 7.36E-10 | 2.11E-09 |
| 36h | 1.51E-09  | 5.45E-09 | 1.18E-08 | 9.49E-10 |
| 48h | 3.24E-08  | 2.08E-08 | 6.48E-08 | 6.74E-08 |
| 72h | 1.73E-08  | 6.57E-09 | 3.94E-08 | 1.25E-08 |
|     | cgd4_3360 |          |          |          |
| 2h  | 8.95E-07  | 1.88E-06 | 9.87E-06 | 1.06E-05 |
| 6h  | 1.74E-07  | 7.38E-07 | 4.14E-06 | 2.30E-06 |
| 12h | 3.26E-07  | 1.30E-07 | 6.79E-06 | 1.26E-05 |
| 24h | 1.00E-06  | 1.17E-06 | 7.98E-07 | 6.72E-06 |
| 36h | 7.75E-07  | 3.20E-07 | 2.31E-06 | 2.12E-06 |
| 48h | 5.10E-07  | 2.69E-07 | 2.19E-06 | 3.51E-06 |
| 72h | 2.74E-07  | 7.05E-08 | 5.18E-07 | 2.06E-07 |
|     | cgd4_3370 |          |          |          |
| 2h  | 4.63E-06  | 1.00E-04 | 9.94E-06 | 9.34E-06 |
| 6h  | 6.12E-07  | 1.11E-04 | 7.29E-06 | 8.69E-06 |
| 12h | 8.89E-08  | 4.69E-06 | 2.34E-07 | 6.43E-07 |
| 24h | 1.28E-06  | 3.89E-05 | 2.62E-06 | 7.77E-06 |
| 36h | 2.03E-06  | 4.03E-05 | 1.82E-05 | 2.76E-05 |
| 48h | 3.09E-06  | 5.10E-05 | 6.95E-06 | 2.79E-05 |
| 72h | 8.57E-06  | 1.06E-04 | 1.55E-04 | 1.71E-05 |
|     | cgd4_3380 |          |          |          |
| 2h  | 0.00E+00  | 0.00E+00 | 0.00E+00 | 1.81E-08 |
| 6h  | 0.00E+00  | 3.34E-09 | 0.00E+00 | 0.00E+00 |
| 12h | 2.49E-08  | 5.16E-08 | 1.11E-07 | 1.13E-06 |
| 24h | 3.08E-08  | 6.55E-08 | 1.19E-07 | 2.74E-07 |
| 36h | 2.80E-08  | 3.08E-08 | 2.79E-07 | 4.56E-07 |
| 48h | 6.85E-08  | 6.23E-08 | 4.63E-08 | 3.83E-07 |
| 72h | 3.04E-08  | 4.33E-08 | 1.75E-07 | 2.53E-08 |
|     | cgd4_3390 |          |          |          |
| 2h  | 2.23E-05  | 7.35E-06 | 7.06E-05 | 3.90E-05 |
| 6h  | 5.70E-06  | 1.01E-05 | 3.95E-05 | 5.54E-05 |
| 12h | 7.54E-06  | 1.74E-06 | 8.25E-06 | 8.26E-05 |
| 24h | 1.21E-05  | 6.74E-06 | 1.31E-05 | 4.72E-05 |
| 36h | 3.24E-06  | 1.21E-06 | 7.00E-06 | 5.35E-06 |
| 48h | 3.72E-06  | 1.58E-06 | 3.08E-06 | 2.07E-05 |
| 72h | 2.58E-06  | 1.24E-06 | 6.00E-06 | 1.14E-06 |
|     | cgd4_3400 |          |          |          |
| 2h  | 1.84E-06  | 8.03E-07 | 8.23E-06 | 6.31E-06 |
| 6h  | 1.17E-06  | 3.06E-06 | 1.03E-05 | 2.03E-05 |

|     |           |          |          |          |
|-----|-----------|----------|----------|----------|
| 12h | 3.55E-07  | 2.66E-07 | 3.29E-06 | 6.10E-06 |
| 24h | 2.41E-06  | 1.04E-06 | 3.66E-06 | 1.55E-05 |
| 36h | 7.69E-07  | 4.07E-07 | 3.16E-06 | 1.15E-06 |
| 48h | 7.24E-07  | 2.41E-07 | 5.01E-07 | 3.22E-06 |
| 72h | 8.72E-08  | 2.25E-07 | 9.85E-07 | 2.59E-07 |
|     | cgd4_3410 |          |          |          |
| 2h  | 1.37E-06  | 6.93E-07 | 1.02E-05 | 1.42E-06 |
| 6h  | 1.68E-06  | 1.54E-06 | 1.17E-05 | 1.78E-05 |
| 12h | 2.28E-06  | 1.71E-06 | 1.07E-05 | 1.09E-05 |
| 24h | 4.18E-06  | 1.21E-06 | 4.27E-06 | 2.85E-05 |
| 36h | 1.93E-06  | 4.05E-06 | 4.15E-05 | 1.80E-05 |
| 48h | 1.56E-05  | 7.60E-07 | 5.62E-06 | 1.31E-05 |
| 72h | 7.89E-07  | 1.10E-06 | 8.01E-06 | 1.83E-06 |
|     | cgd4_3420 |          |          |          |
| 2h  | 3.64E-09  | 1.93E-08 | 6.86E-08 | 5.15E-08 |
| 6h  | 8.72E-08  | 1.86E-08 | 1.35E-07 | 2.58E-07 |
| 12h | 5.59E-08  | 4.10E-08 | 1.50E-07 | 4.85E-07 |
| 24h | 1.16E-07  | 3.30E-08 | 1.11E-07 | 5.84E-07 |
| 36h | 2.11E-07  | 1.85E-07 | 8.20E-07 | 8.41E-07 |
| 48h | 1.69E-07  | 8.35E-08 | 3.91E-07 | 7.95E-07 |
| 72h | 3.24E-07  | 3.82E-07 | 1.68E-06 | 7.04E-07 |
|     | cgd4_3430 |          |          |          |
| 2h  | 0.00E+00  | 2.71E-07 | 4.69E-06 | 1.05E-07 |
| 6h  | 0.00E+00  | 1.15E-08 | 0.00E+00 | 9.03E-08 |
| 12h | 1.70E-05  | 1.07E-05 | 3.28E-05 | 1.02E-04 |
| 24h | 3.55E-06  | 2.77E-06 | 2.96E-06 | 9.73E-06 |
| 36h | 4.80E-06  | 8.72E-06 | 7.06E-05 | 9.74E-05 |
| 48h | 6.84E-06  | 3.93E-06 | 2.10E-05 | 3.35E-05 |
| 72h | 4.15E-05  | 4.45E-05 | 1.38E-04 | 7.96E-05 |
|     | cgd4_3440 |          |          |          |
| 2h  | 0.00E+00  | 0.00E+00 | 0.00E+00 | 0.00E+00 |
| 6h  | 0.00E+00  | 0.00E+00 | 0.00E+00 | 0.00E+00 |
| 12h | 2.40E-06  | 2.05E-06 | 3.02E-06 | 2.03E-05 |
| 24h | 2.80E-07  | 2.62E-07 | 1.96E-07 | 1.06E-06 |
| 36h | 2.19E-07  | 3.90E-07 | 4.43E-06 | 4.50E-06 |
| 48h | 5.31E-07  | 4.76E-07 | 1.03E-06 | 3.45E-06 |
| 72h | 1.13E-06  | 3.96E-07 | 1.80E-06 | 2.82E-06 |
|     | cgd4_3450 |          |          |          |
| 2h  | 0.00E+00  | 0.00E+00 | 0.00E+00 | 0.00E+00 |
| 6h  | 0.00E+00  | 0.00E+00 | 0.00E+00 | 0.00E+00 |
| 12h | 1.57E-06  | 3.45E-06 | 6.85E-06 | 1.73E-05 |
| 24h | 3.57E-07  | 2.56E-07 | 4.63E-07 | 1.12E-06 |
| 36h | 3.25E-07  | 5.69E-07 | 7.63E-06 | 8.76E-06 |
| 48h | 1.09E-07  | 1.48E-07 | 8.05E-07 | 1.51E-06 |
| 72h | 2.75E-07  | 1.25E-07 | 3.28E-07 | 4.13E-07 |
|     | cgd4_3460 |          |          |          |
| 2h  | 1.40E-06  | 3.43E-08 | 0.00E+00 | 4.72E-08 |
| 6h  | 1.05E-07  | 1.29E-07 | 4.73E-07 | 3.12E-08 |
| 12h | 1.47E-06  | 5.96E-06 | 9.88E-06 | 1.88E-05 |
| 24h | 6.44E-07  | 5.80E-07 | 8.17E-07 | 3.36E-06 |
| 36h | 2.17E-06  | 2.56E-06 | 1.64E-05 | 2.09E-05 |
| 48h | 7.33E-07  | 1.36E-06 | 4.25E-06 | 5.22E-06 |
| 72h | 1.33E-06  | 4.47E-07 | 2.57E-06 | 3.57E-06 |

|     |           |          |          |          |
|-----|-----------|----------|----------|----------|
|     | cgd4_3470 |          |          |          |
| 2h  | 0.00E+00  | 0.00E+00 | 2.15E-08 | 0.00E+00 |
| 6h  | 0.00E+00  | 0.00E+00 | 8.67E-09 | 6.18E-09 |
| 12h | 1.42E-05  | 2.17E-05 | 3.32E-05 | 1.85E-04 |
| 24h | 1.10E-06  | 2.07E-06 | 5.92E-06 | 8.31E-06 |
| 36h | 1.32E-06  | 1.75E-06 | 2.29E-05 | 3.45E-05 |
| 48h | 5.37E-07  | 8.96E-07 | 3.88E-06 | 7.74E-06 |
| 72h | 2.24E-07  | 1.36E-07 | 7.07E-07 | 8.15E-07 |
|     | cgd4_3520 |          |          |          |
| 2h  | 4.66E-09  | 7.46E-09 | 5.81E-09 | 2.75E-08 |
| 6h  | 0.00E+00  | 5.05E-09 | 0.00E+00 | 0.00E+00 |
| 12h | 1.33E-07  | 4.65E-07 | 5.66E-07 | 3.95E-06 |
| 24h | 2.55E-08  | 1.30E-07 | 1.08E-07 | 9.05E-07 |
| 36h | 2.60E-07  | 1.76E-07 | 2.09E-06 | 1.89E-06 |
| 48h | 8.16E-08  | 1.17E-07 | 5.54E-07 | 5.90E-07 |
| 72h | 5.30E-08  | 1.87E-08 | 2.49E-08 | 4.55E-08 |
|     | cgd4_3540 |          |          |          |
| 2h  | 3.64E-07  | 1.46E-08 | 3.97E-08 | 1.82E-08 |
| 6h  | 5.04E-09  | 1.85E-07 | 6.96E-08 | 2.91E-08 |
| 12h | 1.23E-06  | 6.64E-05 | 2.68E-06 | 1.48E-05 |
| 24h | 1.92E-07  | 7.53E-07 | 9.26E-07 | 2.15E-06 |
| 36h | 2.43E-06  | 8.25E-06 | 2.05E-05 | 3.44E-05 |
| 48h | 3.16E-07  | 8.93E-06 | 1.42E-06 | 4.13E-06 |
| 72h | 3.20E-07  | 5.51E-07 | 4.59E-07 | 6.32E-06 |
|     | cgd4_3560 |          |          |          |
| 2h  | 2.10E-08  | 3.81E-09 | 1.03E-08 | 1.20E-08 |
| 6h  | 1.27E-08  | 2.61E-09 | 0.00E+00 | 5.80E-09 |
| 12h | 8.80E-08  | 3.50E-08 | 3.08E-07 | 1.00E-06 |
| 24h | 1.36E-07  | 1.70E-07 | 3.73E-07 | 5.17E-07 |
| 36h | 1.35E-07  | 1.41E-07 | 1.80E-06 | 7.98E-07 |
| 48h | 1.03E-07  | 4.16E-07 | 3.91E-07 | 2.88E-07 |
| 72h | 2.26E-08  | 3.23E-08 | 1.08E-07 | 4.94E-08 |
|     | cgd4_3580 |          |          |          |
| 2h  | 8.75E-07  | 1.96E-07 | 3.89E-06 | 1.43E-06 |
| 6h  | 1.20E-08  | 4.37E-08 | 3.34E-07 | 3.28E-08 |
| 12h | 1.28E-06  | 5.30E-07 | 2.93E-06 | 4.41E-06 |
| 24h | 9.27E-07  | 1.49E-06 | 9.11E-07 | 1.79E-06 |
| 36h | 7.50E-07  | 3.09E-07 | 5.15E-06 | 5.11E-06 |
| 48h | 5.82E-07  | 6.63E-07 | 1.05E-06 | 1.94E-06 |
| 72h | 2.16E-07  | 2.85E-07 | 9.69E-07 | 3.74E-07 |
|     | cgd4_3590 |          |          |          |
| 2h  | 1.73E-06  | 2.17E-07 | 5.59E-06 | 6.60E-06 |
| 6h  | 2.16E-07  | 2.63E-07 | 7.64E-07 | 1.17E-07 |
| 12h | 2.51E-06  | 8.13E-07 | 4.58E-06 | 1.20E-05 |
| 24h | 1.54E-06  | 1.97E-06 | 1.43E-06 | 2.81E-06 |
| 36h | 4.71E-07  | 4.13E-07 | 4.15E-06 | 2.42E-06 |
| 48h | 7.31E-07  | 1.05E-06 | 2.32E-06 | 2.38E-06 |
| 72h | 1.27E-06  | 1.73E-06 | 4.86E-06 | 1.94E-06 |
|     | cgd4_3600 |          |          |          |
| 2h  | 1.43E-06  | 6.45E-07 | 1.06E-05 | 5.45E-06 |
| 6h  | 1.68E-06  | 1.03E-06 | 3.42E-06 | 3.84E-06 |
| 12h | 1.63E-06  | 5.26E-07 | 6.43E-06 | 9.89E-06 |
| 24h | 9.87E-07  | 1.06E-06 | 1.45E-06 | 2.93E-06 |

|     |           |          |          |          |
|-----|-----------|----------|----------|----------|
| 36h | 5.23E-07  | 3.88E-07 | 2.73E-06 | 2.96E-06 |
| 48h | 1.40E-07  | 1.84E-07 | 4.80E-07 | 4.59E-07 |
| 72h | 2.30E-07  | 1.18E-07 | 4.43E-07 | 1.54E-07 |
|     | cgd4_3610 |          |          |          |
| 2h  | 5.17E-04  | 1.10E-04 | 7.32E-04 | 6.79E-04 |
| 6h  | 5.27E-05  | 2.36E-05 | 9.75E-05 | 5.03E-04 |
| 12h | 6.15E-04  | 5.62E-04 | 2.74E-04 | 1.76E-03 |
| 24h | 1.40E-04  | 1.55E-04 | 1.19E-04 | 5.85E-04 |
| 36h | 9.64E-05  | 8.01E-05 | 1.85E-04 | 4.55E-04 |
| 48h | 5.87E-05  | 1.31E-04 | 8.64E-05 | 2.35E-04 |
| 72h | 4.13E-05  | 8.62E-05 | 9.09E-05 | 4.91E-05 |
|     | cgd4_3650 |          |          |          |
| 2h  | 1.08E-06  | 3.61E-07 | 8.26E-06 | 7.27E-06 |
| 6h  | 1.66E-07  | 1.88E-07 | 1.25E-07 | 1.60E-07 |
| 12h | 2.64E-05  | 4.92E-06 | 1.29E-05 | 1.56E-05 |
| 24h | 1.40E-06  | 1.16E-06 | 9.52E-07 | 1.14E-06 |
| 36h | 1.10E-06  | 8.05E-07 | 3.35E-06 | 2.83E-06 |
| 48h | 3.05E-07  | 3.09E-07 | 9.53E-07 | 8.07E-07 |
| 72h | 4.53E-07  | 5.25E-07 | 3.28E-07 | 1.44E-07 |
|     | cgd4_3680 |          |          |          |
| 2h  | 0.00E+00  | 1.56E-08 | 1.48E-08 | 0.00E+00 |
| 6h  | 3.53E-09  | 8.32E-10 | 2.54E-08 | 9.33E-09 |
| 12h | 2.19E-06  | 5.25E-07 | 9.83E-07 | 2.67E-06 |
| 24h | 1.03E-07  | 2.08E-07 | 1.69E-07 | 3.39E-07 |
| 36h | 9.83E-08  | 6.11E-08 | 7.68E-07 | 8.91E-07 |
| 48h | 3.54E-08  | 5.01E-08 | 1.96E-07 | 2.62E-07 |
| 72h | 7.11E-08  | 1.17E-07 | 5.66E-08 | 5.31E-08 |
|     | cgd4_3690 |          |          |          |
| 2h  | 5.91E-06  | 5.12E-06 | 5.47E-05 | 3.36E-05 |
| 6h  | 3.37E-06  | 2.59E-06 | 2.05E-05 | 2.83E-05 |
| 12h | 1.01E-06  | 1.25E-06 | 2.47E-05 | 1.00E-05 |
| 24h | 5.78E-07  | 8.75E-07 | 6.68E-06 | 1.43E-05 |
| 36h | 2.16E-06  | 1.81E-06 | 6.46E-06 | 4.73E-06 |
| 48h | 1.10E-06  | 8.74E-07 | 6.78E-06 | 9.35E-06 |
| 72h | 1.34E-06  | 1.30E-06 | 9.95E-07 | 3.36E-07 |
|     | cgd4_3700 |          |          |          |
| 2h  | 0.00E+00  | 0.00E+00 | 0.00E+00 | 0.00E+00 |
| 6h  | 9.91E-08  | 2.29E-08 | 3.47E-07 | 2.66E-06 |
| 12h | 4.76E-07  | 9.53E-07 | 6.19E-07 | 4.94E-07 |
| 24h | 5.68E-07  | 5.21E-07 | 8.20E-07 | 8.55E-06 |
| 36h | 4.86E-07  | 1.93E-06 | 2.06E-06 | 9.03E-06 |
| 48h | 4.10E-05  | 4.71E-05 | 7.40E-05 | 1.82E-04 |
| 72h | 5.62E-06  | 7.73E-06 | 4.52E-06 | 6.47E-06 |
|     | cgd4_3740 |          |          |          |
| 2h  | 3.51E-05  | 2.78E-05 | 1.42E-05 | 7.22E-05 |
| 6h  | 9.01E-06  | 6.71E-05 | 5.20E-05 | 4.84E-04 |
| 12h | 7.22E-08  | 4.43E-08 | 3.30E-06 | 9.34E-06 |
| 24h | 1.32E-05  | 1.84E-05 | 9.19E-05 | 3.23E-04 |
| 36h | 1.13E-05  | 2.74E-05 | 3.69E-05 | 3.26E-05 |
| 48h | 1.20E-05  | 4.16E-05 | 3.52E-05 | 5.90E-05 |
| 72h | 1.04E-05  | 3.01E-05 | 6.72E-06 | 1.30E-05 |
|     | cgd4_3750 |          |          |          |
| 2h  | 1.08E-05  | 3.58E-06 | 2.65E-05 | 3.60E-05 |

|           |          |          |          |          |
|-----------|----------|----------|----------|----------|
| 6h        | 2.44E-06 | 2.10E-06 | 2.70E-05 | 2.71E-05 |
| 12h       | 1.33E-06 | 7.74E-07 | 5.42E-06 | 9.13E-06 |
| 24h       | 1.75E-06 | 2.38E-06 | 5.87E-06 | 2.09E-05 |
| 36h       | 2.43E-06 | 2.65E-06 | 6.29E-06 | 5.27E-06 |
| 48h       | 2.46E-06 | 2.69E-06 | 5.18E-06 | 7.55E-06 |
| 72h       | 2.16E-07 | 4.74E-07 | 3.65E-07 | 1.55E-07 |
| cgd4_3760 |          |          |          |          |
| 2h        | 3.17E-07 | 1.36E-07 | 4.03E-07 | 1.28E-06 |
| 6h        | 1.96E-07 | 3.23E-07 | 2.08E-06 | 1.39E-06 |
| 12h       | 2.64E-08 | 1.37E-07 | 4.29E-08 | 1.79E-07 |
| 24h       | 7.22E-08 | 6.35E-08 | 4.30E-07 | 4.78E-07 |
| 36h       | 1.24E-07 | 8.54E-07 | 8.95E-08 | 2.78E-07 |
| 48h       | 5.21E-08 | 2.01E-07 | 1.75E-07 | 2.50E-07 |
| 72h       | 1.77E-08 | 2.98E-07 | 2.02E-07 | 2.73E-08 |
| cgd4_3770 |          |          |          |          |
| 2h        | 1.43E-02 | 9.83E-03 | 1.66E-02 | 3.58E-02 |
| 6h        | 1.54E-02 | 3.36E-03 | 1.77E-02 | 6.89E-02 |
| 12h       | 1.76E-03 | 1.50E-03 | 8.40E-03 | 9.89E-03 |
| 24h       | 1.20E-03 | 6.05E-04 | 9.59E-03 | 8.04E-03 |
| 36h       | 9.82E-04 | 1.08E-03 | 6.40E-03 | 2.08E-03 |
| 48h       | 1.02E-03 | 3.94E-04 | 4.99E-03 | 3.68E-03 |
| 72h       | 1.59E-04 | 1.03E-04 | 5.02E-04 | 4.78E-04 |
| cgd4_3790 |          |          |          |          |
| 2h        | 1.30E-07 | 6.04E-08 | 2.16E-08 | 1.24E-07 |
| 6h        | 1.88E-07 | 7.02E-08 | 4.49E-07 | 1.26E-06 |
| 12h       | 8.42E-09 | 1.41E-08 | 3.84E-08 | 5.07E-08 |
| 24h       | 5.35E-08 | 1.01E-08 | 2.88E-07 | 3.72E-07 |
| 36h       | 9.70E-08 | 1.72E-07 | 4.68E-07 | 3.88E-07 |
| 48h       | 3.66E-08 | 2.85E-08 | 2.04E-07 | 2.85E-07 |
| 72h       | 6.43E-08 | 3.92E-08 | 1.35E-07 | 2.19E-07 |
| cgd4_3810 |          |          |          |          |
| 2h        | 1.16E-06 | 2.03E-06 | 2.17E-06 | 1.39E-06 |
| 6h        | 3.48E-06 | 7.83E-07 | 6.74E-06 | 5.30E-06 |
| 12h       | 5.47E-07 | 7.15E-07 | 1.75E-06 | 5.12E-06 |
| 24h       | 6.09E-07 | 4.17E-07 | 3.99E-06 | 3.14E-06 |
| 36h       | 9.75E-07 | 1.13E-06 | 3.41E-06 | 5.03E-06 |
| 48h       | 3.29E-07 | 2.22E-07 | 1.75E-06 | 1.54E-06 |
| 72h       | 3.53E-07 | 2.06E-07 | 1.20E-06 | 1.23E-06 |
| cgd4_3820 |          |          |          |          |
| 2h        | 0.00E+00 | 0.00E+00 | 0.00E+00 | 0.00E+00 |
| 6h        | 0.00E+00 | 0.00E+00 | 0.00E+00 | 0.00E+00 |
| 12h       | 1.53E-07 | 1.09E-07 | 4.56E-07 | 1.71E-06 |
| 24h       | 1.84E-08 | 2.94E-08 | 6.53E-08 | 6.52E-08 |
| 36h       | 1.79E-07 | 1.26E-07 | 1.55E-06 | 1.52E-06 |
| 48h       | 2.21E-08 | 2.82E-08 | 3.37E-07 | 1.61E-07 |
| 72h       | 2.86E-08 | 4.78E-08 | 4.60E-07 | 2.40E-07 |
| cgd4_3830 |          |          |          |          |
| 2h        | 0.00E+00 | 0.00E+00 | 0.00E+00 | 0.00E+00 |
| 6h        | 1.74E-05 | 4.28E-06 | 1.16E-05 | 2.65E-04 |
| 12h       | 7.26E-06 | 5.68E-08 | 2.18E-05 | 1.40E-04 |
| 24h       | 5.42E-06 | 1.10E-05 | 4.37E-05 | 2.36E-04 |
| 36h       | 7.03E-05 | 8.00E-05 | 1.06E-04 | 2.12E-04 |
| 48h       | 3.14E-05 | 3.19E-05 | 7.38E-05 | 1.47E-04 |

|     |           |          |          |          |
|-----|-----------|----------|----------|----------|
| 72h | 4.46E-05  | 5.66E-05 | 1.91E-04 | 1.03E-04 |
|     | cgd4_3840 |          |          |          |
| 2h  | 0.00E+00  | 0.00E+00 | 0.00E+00 | 0.00E+00 |
| 6h  | 0.00E+00  | 4.49E-09 | 1.94E-09 | 1.95E-08 |
| 12h | 7.85E-08  | 6.79E-08 | 6.29E-07 | 7.64E-07 |
| 24h | 3.70E-08  | 4.72E-08 | 1.59E-07 | 3.92E-07 |
| 36h | 7.52E-07  | 4.71E-07 | 1.48E-06 | 1.86E-06 |
| 48h | 1.53E-07  | 2.58E-07 | 7.98E-07 | 9.03E-07 |
| 72h | 4.14E-07  | 3.56E-07 | 1.20E-06 | 8.70E-07 |
|     | cgd4_3850 |          |          |          |
| 2h  | 9.82E-06  | 4.19E-06 | 5.50E-06 | 7.63E-07 |
| 6h  | 6.20E-05  | 8.13E-05 | 1.47E-04 | 4.49E-04 |
| 12h | 1.43E-06  | 1.02E-06 | 2.91E-05 | 7.50E-05 |
| 24h | 3.84E-06  | 1.81E-05 | 3.36E-05 | 1.56E-04 |
| 36h | 2.71E-05  | 3.66E-05 | 5.74E-05 | 7.52E-05 |
| 48h | 6.15E-06  | 1.50E-05 | 1.90E-05 | 3.61E-05 |
| 72h | 7.80E-07  | 5.30E-07 | 5.69E-06 | 1.65E-06 |
|     | cgd4_3860 |          |          |          |
| 2h  | 2.44E-08  | 7.21E-08 | 8.94E-08 | 4.71E-08 |
| 6h  | 8.55E-07  | 1.12E-06 | 1.50E-06 | 4.99E-06 |
| 12h | 5.62E-08  | 4.58E-08 | 4.27E-07 | 5.96E-07 |
| 24h | 6.05E-08  | 1.74E-07 | 5.69E-07 | 1.53E-06 |
| 36h | 4.22E-07  | 2.60E-07 | 8.61E-07 | 1.19E-06 |
| 48h | 2.05E-07  | 2.30E-07 | 5.14E-07 | 7.86E-07 |
| 72h | 5.13E-08  | 2.18E-08 | 2.44E-07 | 6.63E-08 |
|     | cgd4_3870 |          |          |          |
| 2h  | 0.00E+00  | 0.00E+00 | 0.00E+00 | 0.00E+00 |
| 6h  | 0.00E+00  | 2.04E-08 | 0.00E+00 | 0.00E+00 |
| 12h | 9.34E-09  | 0.00E+00 | 2.83E-08 | 0.00E+00 |
| 24h | 8.38E-10  | 1.32E-07 | 3.45E-08 | 3.70E-08 |
| 36h | 2.04E-07  | 4.82E-07 | 1.83E-07 | 5.24E-07 |
| 48h | 1.91E-06  | 2.45E-06 | 2.17E-06 | 4.16E-06 |
| 72h | 4.63E-07  | 9.95E-07 | 1.49E-06 | 1.44E-06 |
|     | cgd4_3950 |          |          |          |
| 2h  | 2.35E-07  | 3.43E-08 | 2.71E-07 | 9.08E-08 |
| 6h  | 1.40E-06  | 1.43E-06 | 3.29E-06 | 1.17E-05 |
| 12h | 4.24E-07  | 2.43E-07 | 8.25E-07 | 1.62E-06 |
| 24h | 3.88E-07  | 7.06E-07 | 2.50E-06 | 7.57E-06 |
| 36h | 9.96E-07  | 8.65E-07 | 2.11E-06 | 1.80E-06 |
| 48h | 8.50E-07  | 6.36E-07 | 2.38E-06 | 2.84E-06 |
| 72h | 7.15E-08  | 7.34E-08 | 6.65E-07 | 1.66E-07 |
|     | cgd4_3970 |          |          |          |
| 2h  | 3.19E-06  | 9.59E-07 | 2.43E-06 | 2.54E-06 |
| 6h  | 2.89E-07  | 3.75E-07 | 8.45E-07 | 2.50E-06 |
| 12h | 3.63E-07  | 1.41E-07 | 8.81E-07 | 3.36E-06 |
| 24h | 2.27E-07  | 3.51E-07 | 4.88E-07 | 1.26E-06 |
| 36h | 1.57E-07  | 1.23E-07 | 9.96E-07 | 9.00E-07 |
| 48h | 1.50E-07  | 1.07E-07 | 8.24E-07 | 1.04E-06 |
| 72h | 3.77E-08  | 4.05E-08 | 2.23E-07 | 8.38E-08 |
|     | cgd4_3980 |          |          |          |
| 2h  | 1.41E-08  | 3.95E-07 | 1.74E-08 | 1.54E-08 |
| 6h  | 3.83E-08  | 0.00E+00 | 1.94E-07 | 6.59E-08 |
| 12h | 7.56E-09  | 3.99E-07 | 5.30E-08 | 8.83E-09 |

|     |           |          |          |          |
|-----|-----------|----------|----------|----------|
| 24h | 3.17E-08  | 4.30E-06 | 3.34E-07 | 1.71E-07 |
| 36h | 1.24E-07  | 1.24E-05 | 7.32E-07 | 3.19E-07 |
| 48h | 3.47E-07  | 3.35E-05 | 1.31E-06 | 1.10E-06 |
| 72h | 2.56E-07  | 3.97E-05 | 2.11E-06 | 1.47E-06 |
|     | cgd4_3990 |          |          |          |
| 2h  | 2.03E-07  | 6.44E-08 | 2.87E-06 | 2.71E-08 |
| 6h  | 1.02E-07  | 4.03E-07 | 3.04E-06 | 1.13E-06 |
| 12h | 2.30E-08  | 8.39E-08 | 2.19E-07 | 1.56E-06 |
| 24h | 5.83E-08  | 2.38E-07 | 1.29E-06 | 4.06E-07 |
| 36h | 2.29E-07  | 2.78E-07 | 8.50E-07 | 3.50E-07 |
| 48h | 2.14E-07  | 4.09E-07 | 7.29E-07 | 5.00E-07 |
| 72h | 1.21E-07  | 2.01E-07 | 3.91E-07 | 1.86E-07 |
|     | cgd4_4000 |          |          |          |
| 2h  | 0.00E+00  | 0.00E+00 | 0.00E+00 | 0.00E+00 |
| 6h  | 9.21E-09  | 0.00E+00 | 0.00E+00 | 0.00E+00 |
| 12h | 2.18E-08  | 0.00E+00 | 6.21E-09 | 0.00E+00 |
| 24h | 1.80E-08  | 7.24E-09 | 1.44E-08 | 6.04E-08 |
| 36h | 3.21E-08  | 2.18E-08 | 4.33E-08 | 1.29E-07 |
| 48h | 2.19E-08  | 3.89E-05 | 1.69E-07 | 1.20E-07 |
| 72h | 1.10E-07  | 1.04E-07 | 3.15E-07 | 9.30E-08 |
|     | cgd4_4010 |          |          |          |
| 2h  | 0.00E+00  | 0.00E+00 | 0.00E+00 | 0.00E+00 |
| 6h  | 2.29E-07  | 2.75E-07 | 2.49E-04 | 5.33E-07 |
| 12h | 3.70E-08  | 3.61E-08 | 1.78E-07 | 3.79E-09 |
| 24h | 1.63E-07  | 1.39E-07 | 1.91E-06 | 1.43E-06 |
| 36h | 2.87E-07  | 2.68E-07 | 1.03E-06 | 5.82E-07 |
| 48h | 2.81E-07  | 2.43E-07 | 6.22E-07 | 5.97E-07 |
| 72h | 2.46E-07  | 1.66E-07 | 9.52E-07 | 2.55E-07 |
|     | cgd4_4040 |          |          |          |
| 2h  | 3.95E-08  | 9.20E-09 | 6.27E-08 | 1.19E-08 |
| 6h  | 5.07E-09  | 4.51E-10 | 1.76E-08 | 9.36E-08 |
| 12h | 1.86E-08  | 2.52E-08 | 1.23E-07 | 1.74E-07 |
| 24h | 3.07E-08  | 9.96E-09 | 5.01E-08 | 2.50E-08 |
| 36h | 2.08E-08  | 2.43E-08 | 1.40E-07 | 9.29E-08 |
| 48h | 8.85E-09  | 9.87E-09 | 2.35E-08 | 1.34E-08 |
| 72h | 7.79E-09  | 2.10E-08 | 3.24E-08 | 5.19E-08 |
|     | cgd4_4050 |          |          |          |
| 2h  | 0.00E+00  | 0.00E+00 | 4.69E-08 | 5.27E-09 |
| 6h  | 0.00E+00  | 0.00E+00 | 5.11E-08 | 0.00E+00 |
| 12h | 5.23E-07  | 4.71E-07 | 2.03E-06 | 3.17E-06 |
| 24h | 8.55E-08  | 1.02E-07 | 1.05E-07 | 1.20E-07 |
| 36h | 1.75E-07  | 1.70E-07 | 1.84E-06 | 1.47E-06 |
| 48h | 6.79E-08  | 8.98E-08 | 3.27E-07 | 1.99E-07 |
| 72h | 8.42E-08  | 3.48E-07 | 2.73E-07 | 2.04E-07 |
|     | cgd4_4060 |          |          |          |
| 2h  | 0.00E+00  | 3.46E-08 | 1.24E-08 | 0.00E+00 |
| 6h  | 0.00E+00  | 0.00E+00 | 0.00E+00 | 0.00E+00 |
| 12h | 7.00E-07  | 1.12E-06 | 1.04E-05 | 1.07E-05 |
| 24h | 7.18E-07  | 8.64E-07 | 6.62E-07 | 1.15E-06 |
| 36h | 3.29E-06  | 2.59E-06 | 1.94E-05 | 6.36E-06 |
| 48h | 1.55E-06  | 1.51E-06 | 1.44E-05 | 2.69E-06 |
| 72h | 4.67E-07  | 9.60E-07 | 4.04E-06 | 5.14E-07 |
|     | cgd4_4080 |          |          |          |

|           |          |          |          |          |
|-----------|----------|----------|----------|----------|
| 2h        | 0.00E+00 | 0.00E+00 | 0.00E+00 | 0.00E+00 |
| 6h        | 2.40E-09 | 2.41E-08 | 3.22E-08 | 1.58E-07 |
| 12h       | 1.73E-07 | 2.85E-07 | 4.37E-07 | 6.43E-07 |
| 24h       | 3.18E-08 | 2.14E-08 | 3.65E-07 | 1.57E-07 |
| 36h       | 3.06E-07 | 3.84E-07 | 1.36E-06 | 4.74E-07 |
| 48h       | 6.59E-08 | 8.25E-08 | 4.25E-07 | 3.57E-07 |
| 72h       | 2.92E-08 | 2.43E-07 | 1.92E-07 | 6.23E-08 |
| cgd4_4100 |          |          |          |          |
| 2h        | 0.00E+00 | 2.46E-08 | 0.00E+00 | 0.00E+00 |
| 6h        | 1.66E-08 | 2.63E-08 | 4.52E-07 | 7.14E-07 |
| 12h       | 1.02E-08 | 2.32E-08 | 1.25E-07 | 8.78E-08 |
| 24h       | 1.13E-08 | 1.68E-08 | 5.22E-06 | 2.27E-07 |
| 36h       | 1.14E-07 | 1.08E-07 | 1.32E-06 | 4.54E-07 |
| 48h       | 7.65E-08 | 1.07E-07 | 4.63E-07 | 7.90E-07 |
| 72h       | 4.82E-08 | 3.90E-07 | 1.21E-07 | 2.69E-08 |
| cgd4_4110 |          |          |          |          |
| 2h        | 1.70E-04 | 6.64E-05 | 1.27E-04 | 1.51E-04 |
| 6h        | 8.23E-06 | 1.67E-05 | 9.80E-05 | 1.70E-05 |
| 12h       | 3.87E-05 | 1.69E-05 | 1.93E-04 | 3.76E-04 |
| 24h       | 1.01E-04 | 3.41E-05 | 1.59E-04 | 1.36E-04 |
| 36h       | 3.19E-05 | 6.09E-05 | 7.93E-04 | 4.89E-05 |
| 48h       | 3.77E-05 | 2.39E-05 | 4.95E-05 | 4.83E-05 |
| 72h       | 7.24E-06 | 1.57E-05 | 2.63E-05 | 7.95E-06 |
| cgd4_4120 |          |          |          |          |
| 2h        | 2.56E-09 | 8.87E-08 | 0.00E+00 | 0.00E+00 |
| 6h        | 6.05E-08 | 1.19E-07 | 1.49E-04 | 1.56E-06 |
| 12h       | 3.38E-07 | 1.23E-06 | 3.22E-06 | 2.70E-06 |
| 24h       | 2.52E-07 | 0.00E+00 | 2.87E-06 | 3.20E-06 |
| 36h       | 9.54E-07 | 7.80E-07 | 5.66E-06 | 1.81E-06 |
| 48h       | 7.29E-07 | 8.27E-07 | 2.90E-06 | 3.38E-06 |
| 72h       | 1.73E-07 | 1.75E-07 | 1.18E-06 | 1.86E-07 |
| cgd4_4140 |          |          |          |          |
| 2h        | 9.05E-04 | 1.07E-03 | 1.48E-02 | 7.10E-03 |
| 6h        | 3.15E-03 | 4.51E-03 | 4.28E-02 | 4.31E-02 |
| 12h       | 5.78E-04 | 1.01E-04 | 8.17E-03 | 8.99E-03 |
| 24h       | 6.75E-04 | 2.75E-04 | 5.42E-03 | 8.53E-03 |
| 36h       | 8.77E-04 | 1.47E-03 | 4.58E-03 | 2.51E-03 |
| 48h       | 3.89E-04 | 8.58E-04 | 2.20E-03 | 2.43E-03 |
| 72h       | 1.77E-04 | 9.30E-05 | 1.22E-03 | 1.53E-04 |
| cgd4_4220 |          |          |          |          |
| 2h        | 2.30E-04 | 7.17E-05 | 3.43E-04 | 3.81E-04 |
| 6h        | 1.31E-03 | 4.67E-05 | 8.65E-04 | 2.59E-05 |
| 12h       | 8.70E-06 | 2.84E-08 | 4.86E-05 | 3.89E-05 |
| 24h       | 2.70E-05 | 2.22E-05 | 9.31E-04 | 2.62E-05 |
| 36h       | 3.61E-05 | 3.84E-05 | 1.63E-04 | 3.31E-05 |
| 48h       | 4.88E-06 | 7.66E-06 | 1.30E-04 | 2.94E-05 |
| 72h       | 6.84E-06 | 1.29E-05 | 4.73E-05 | 8.78E-06 |
| cgd4_4230 |          |          |          |          |
| 2h        | 1.05E-06 | 5.86E-07 | 2.56E-06 | 1.31E-06 |
| 6h        | 4.95E-08 | 2.07E-07 | 2.86E-06 | 3.73E-07 |
| 12h       | 1.36E-07 | 1.56E-07 | 9.76E-07 | 2.71E-06 |
| 24h       | 6.02E-07 | 4.28E-07 | 7.38E-06 | 1.57E-06 |
| 36h       | 2.04E-07 | 4.63E-07 | 1.32E-06 | 8.91E-07 |



|     |           |          |          |          |
|-----|-----------|----------|----------|----------|
| 48h | 5.09E-08  | 8.07E-08 | 1.36E-06 | 3.12E-07 |
| 72h | 1.66E-07  | 7.91E-08 | 8.78E-07 | 3.17E-07 |
|     | cgd4_4240 |          |          |          |
| 2h  | 9.06E-07  | 7.27E-07 | 2.50E-06 | 2.53E-06 |
| 6h  | 6.95E-08  | 1.01E-07 | 1.88E-06 | 2.15E-07 |
| 12h | 9.86E-08  | 3.42E-07 | 1.94E-06 | 3.91E-06 |
| 24h | 3.20E-07  | 1.53E-07 | 2.97E-06 | 4.96E-07 |
| 36h | 1.58E-07  | 3.07E-07 | 1.20E-06 | 5.53E-07 |
| 48h | 3.28E-08  | 4.86E-08 | 6.72E-07 | 2.50E-07 |
| 72h | 8.86E-08  | 1.74E-05 | 4.34E-04 | 4.68E-06 |
|     | cgd4_4260 |          |          |          |
| 2h  | 0.00E+00  | 0.00E+00 | 0.00E+00 | 9.57E-09 |
| 6h  | 0.00E+00  | 0.00E+00 | 0.00E+00 | 0.00E+00 |
| 12h | 0.00E+00  | 5.12E-08 | 0.00E+00 | 0.00E+00 |
| 24h | 0.00E+00  | 3.48E-10 | 7.40E-10 | 6.98E-09 |
| 36h | 2.04E-09  | 8.58E-10 | 4.14E-09 | 9.42E-09 |
| 48h | 1.38E-08  | 1.52E-08 | 7.27E-08 | 8.05E-08 |
| 72h | 6.79E-08  | 6.14E-08 | 5.09E-07 | 3.60E-07 |
|     | cgd4_4270 |          |          |          |
| 2h  | 0.00E+00  | 0.00E+00 | 0.00E+00 | 0.00E+00 |
| 6h  | 0.00E+00  | 1.30E-09 | 0.00E+00 | 0.00E+00 |
| 12h | 0.00E+00  | 2.63E-08 | 1.77E-08 | 0.00E+00 |
| 24h | 1.80E-10  | 0.00E+00 | 1.11E-09 | 6.62E-10 |
| 36h | 1.39E-08  | 9.80E-09 | 8.96E-09 | 1.31E-08 |
| 48h | 1.41E-07  | 1.26E-07 | 9.37E-07 | 2.82E-07 |
| 72h | 2.14E-08  | 2.73E-08 | 1.25E-07 | 8.40E-08 |
|     | cgd4_4280 |          |          |          |
| 2h  | 0.00E+00  | 1.53E-07 | 0.00E+00 | 0.00E+00 |
| 6h  | 0.00E+00  | 1.76E-07 | 5.87E-07 | 2.39E-07 |
| 12h | 1.62E-06  | 4.45E-06 | 1.20E-05 | 1.85E-05 |
| 24h | 1.55E-07  | 6.04E-07 | 1.39E-05 | 7.23E-06 |
| 36h | 2.10E-06  | 3.54E-06 | 4.93E-05 | 2.70E-05 |
| 48h | 3.55E-06  | 4.48E-06 | 2.12E-05 | 9.35E-06 |
| 72h | 1.25E-06  | 1.49E-06 | 2.26E-05 | 2.10E-06 |
|     | cgd4_4290 |          |          |          |
| 2h  | 9.98E-08  | 2.95E-06 | 1.38E-07 | 0.00E+00 |
| 6h  | 2.28E-08  | 8.67E-09 | 1.19E-07 | 2.65E-06 |
| 12h | 4.82E-06  | 1.86E-05 | 8.88E-05 | 2.73E-05 |
| 24h | 6.40E-07  | 2.49E-06 | 1.47E-05 | 1.18E-05 |
| 36h | 4.63E-06  | 7.27E-06 | 1.11E-04 | 3.05E-05 |
| 48h | 4.69E-06  | 1.05E-05 | 7.05E-05 | 2.77E-05 |
| 72h | 3.82E-06  | 1.58E-06 | 3.43E-05 | 5.38E-06 |
|     | cgd4_4300 |          |          |          |
| 2h  | 3.30E-08  | 1.23E-08 | 3.14E-08 | 3.56E-07 |
| 6h  | 4.02E-08  | 1.44E-07 | 8.11E-07 | 2.06E-06 |
| 12h | 3.02E-08  | 5.85E-08 | 2.26E-07 | 3.88E-07 |
| 24h | 1.68E-08  | 6.28E-08 | 9.18E-07 | 1.16E-06 |
| 36h | 1.96E-07  | 1.73E-07 | 8.80E-07 | 6.30E-07 |
| 48h | 1.38E-07  | 1.12E-07 | 5.25E-07 | 4.02E-07 |
| 72h | 2.47E-08  | 2.37E-08 | 2.86E-07 | 2.04E-08 |
|     | cgd4_4310 |          |          |          |
| 2h  | 2.63E-06  | 8.19E-06 | 6.17E-06 | 4.54E-06 |
| 6h  | 3.39E-08  | 6.87E-08 | 7.49E-07 | 2.47E-07 |

|           |          |          |          |          |
|-----------|----------|----------|----------|----------|
| 12h       | 4.55E-07 | 7.00E-07 | 4.34E-06 | 4.39E-06 |
| 24h       | 6.07E-07 | 1.37E-06 | 1.46E-06 | 3.51E-06 |
| 36h       | 3.65E-07 | 3.31E-07 | 3.91E-06 | 9.48E-07 |
| 48h       | 1.47E-07 | 3.36E-07 | 1.52E-06 | 1.15E-06 |
| 72h       | 0.00E+00 | 5.44E-08 | 7.11E-07 | 1.02E-07 |
| cgd4_4320 |          |          |          |          |
| 2h        | 4.47E-08 | 0.00E+00 | 0.00E+00 | 0.00E+00 |
| 6h        | 2.83E-08 | 4.57E-08 | 4.11E-07 | 1.30E-08 |
| 12h       | 1.71E-08 | 3.76E-08 | 1.73E-08 | 1.88E-07 |
| 24h       | 8.02E-09 | 4.10E-08 | 7.90E-07 | 4.04E-07 |
| 36h       | 5.64E-08 | 1.34E-07 | 1.10E-06 | 1.83E-07 |
| 48h       | 1.19E-07 | 1.05E-07 | 5.24E-07 | 3.82E-07 |
| 72h       | 1.07E-08 | 1.63E-08 | 1.30E-07 | 1.48E-08 |
| cgd4_4330 |          |          |          |          |
| 2h        | 0.00E+00 | 1.21E-05 | 5.53E-07 | 5.69E-08 |
| 6h        | 2.27E-07 | 7.90E-07 | 3.91E-06 | 3.57E-06 |
| 12h       | 1.30E-05 | 2.98E-05 | 4.38E-04 | 8.51E-05 |
| 24h       | 2.75E-06 | 6.91E-06 | 5.55E-05 | 3.87E-05 |
| 36h       | 1.23E-06 | 3.16E-06 | 1.56E-04 | 2.23E-05 |
| 48h       | 3.34E-06 | 2.71E-06 | 4.27E-05 | 1.51E-05 |
| 72h       | 4.97E-07 | 4.17E-07 | 3.29E-05 | 2.18E-06 |
| cgd4_4340 |          |          |          |          |
| 2h        | 0.00E+00 | 2.74E-07 | 0.00E+00 | 0.00E+00 |
| 6h        | 2.11E-06 | 2.01E-05 | 9.39E-05 | 8.75E-05 |
| 12h       | 2.20E-06 | 4.58E-06 | 2.85E-05 | 1.79E-05 |
| 24h       | 2.17E-06 | 4.16E-06 | 1.03E-04 | 4.58E-05 |
| 36h       | 6.78E-06 | 5.83E-06 | 1.71E-04 | 2.54E-05 |
| 48h       | 3.33E-06 | 5.06E-06 | 7.37E-05 | 2.18E-05 |
| 72h       | 2.13E-06 | 1.11E-06 | 1.90E-05 | 1.66E-06 |
| cgd4_4350 |          |          |          |          |
| 2h        | 0.00E+00 | 0.00E+00 | 1.12E-05 | 1.85E-05 |
| 6h        | 2.90E-08 | 0.00E+00 | 0.00E+00 | 4.38E-05 |
| 12h       | 2.83E-06 | 0.00E+00 | 2.77E-04 | 2.58E-06 |
| 24h       | 1.19E-06 | 2.89E-05 | 2.61E-04 | 1.02E-05 |
| 36h       | 8.40E-06 | 1.52E-04 | 3.15E-04 | 6.50E-05 |
| 48h       | 1.64E-05 | 1.71E-04 | 8.24E-04 | 2.36E-05 |
| 72h       | 1.82E-05 | 8.65E-05 | 2.56E-04 | 7.36E-06 |
| cgd4_4360 |          |          |          |          |
| 2h        | 0.00E+00 | 0.00E+00 | 0.00E+00 | 0.00E+00 |
| 6h        | 2.08E-09 | 1.43E-09 | 0.00E+00 | 2.23E-08 |
| 12h       | 1.69E-09 | 7.09E-10 | 9.67E-09 | 8.72E-09 |
| 24h       | 9.89E-09 | 6.17E-09 | 2.75E-07 | 5.05E-08 |
| 36h       | 2.21E-08 | 1.55E-08 | 2.40E-07 | 1.05E-07 |
| 48h       | 2.22E-08 | 1.20E-08 | 6.20E-08 | 7.86E-08 |
| 72h       | 6.33E-09 | 4.67E-09 | 6.15E-08 | 1.17E-08 |
| cgd4_4370 |          |          |          |          |
| 2h        | 0.00E+00 | 0.00E+00 | 0.00E+00 | 0.00E+00 |
| 6h        | 2.15E-08 | 1.42E-08 | 1.30E-08 | 3.22E-07 |
| 12h       | 2.12E-09 | 2.46E-09 | 1.06E-08 | 1.20E-07 |
| 24h       | 1.49E-08 | 8.20E-09 | 1.74E-07 | 3.68E-07 |
| 36h       | 4.84E-08 | 2.82E-08 | 1.50E-07 | 1.55E-07 |
| 48h       | 2.15E-08 | 1.73E-08 | 2.83E-08 | 1.04E-07 |
| 72h       | 5.22E-09 | 1.82E-08 | 3.79E-09 | 1.58E-08 |

|     |           |          |          |          |
|-----|-----------|----------|----------|----------|
|     | cgd4_4390 |          |          |          |
| 2h  | 1.24E-06  | 6.54E-06 | 1.55E-04 | 5.97E-05 |
| 6h  | 2.53E-06  | 9.08E-06 | 3.24E-06 | 2.67E-05 |
| 12h | 7.72E-07  | 3.03E-07 | 3.34E-06 | 1.34E-05 |
| 24h | 1.67E-06  | 3.17E-06 | 4.38E-05 | 3.34E-05 |
| 36h | 2.52E-06  | 3.22E-06 | 4.95E-05 | 1.68E-05 |
| 48h | 5.98E-06  | 2.39E-05 | 5.62E-05 | 2.82E-05 |
| 72h | 1.02E-06  | 9.86E-07 | 1.43E-05 | 5.09E-06 |
|     | cgd4_4400 |          |          |          |
| 2h  | 0.00E+00  | 0.00E+00 | 0.00E+00 | 0.00E+00 |
| 6h  | 0.00E+00  | 0.00E+00 | 1.61E-09 | 0.00E+00 |
| 12h | 7.20E-09  | 3.35E-09 | 0.00E+00 | 4.17E-09 |
| 24h | 1.05E-10  | 6.87E-10 | 2.65E-10 | 0.00E+00 |
| 36h | 3.10E-10  | 4.96E-09 | 9.06E-09 | 1.47E-09 |
| 48h | 4.80E-09  | 1.45E-08 | 2.91E-08 | 2.02E-08 |
| 72h | 1.38E-08  | 2.31E-08 | 4.37E-08 | 3.06E-08 |
|     | cgd4_4410 |          |          |          |
| 2h  | 9.22E-08  | 7.31E-09 | 4.41E-07 | 1.43E-08 |
| 6h  | 7.36E-08  | 1.20E-07 | 3.16E-07 | 2.51E-07 |
| 12h | 1.98E-08  | 2.30E-08 | 1.46E-07 | 6.58E-07 |
| 24h | 2.36E-09  | 1.06E-08 | 1.66E-07 | 4.16E-07 |
| 36h | 8.77E-08  | 6.58E-08 | 1.14E-06 | 7.16E-07 |
| 48h | 1.81E-08  | 1.63E-08 | 3.98E-07 | 4.03E-07 |
| 72h | 1.67E-08  | 4.84E-08 | 1.25E-07 | 5.35E-08 |
|     | cgd4_4420 |          |          |          |
| 2h  | 5.87E-07  | 6.92E-08 | 3.42E-06 | 4.79E-06 |
| 6h  | 5.84E-08  | 4.19E-08 | 3.82E-07 | 1.54E-07 |
| 12h | 8.25E-08  | 8.72E-08 | 3.76E-07 | 6.31E-07 |
| 24h | 3.98E-08  | 3.52E-08 | 2.81E-07 | 6.03E-07 |
| 36h | 1.30E-07  | 1.64E-07 | 6.94E-07 | 4.38E-07 |
| 48h | 3.32E-08  | 3.09E-08 | 3.38E-07 | 3.90E-07 |
| 72h | 2.56E-08  | 3.31E-08 | 1.16E-07 | 3.04E-08 |
|     | cgd4_4440 |          |          |          |
| 2h  | 0.00E+00  | 0.00E+00 | 0.00E+00 | 9.17E-09 |
| 6h  | 3.09E-09  | 2.87E-09 | 4.15E-09 | 3.88E-09 |
| 12h | 0.00E+00  | 0.00E+00 | 7.21E-10 | 1.44E-08 |
| 24h | 9.31E-10  | 5.06E-10 | 0.00E+00 | 5.75E-09 |
| 36h | 1.12E-08  | 8.11E-09 | 6.67E-09 | 1.33E-08 |
| 48h | 2.94E-09  | 3.73E-09 | 1.73E-08 | 2.55E-08 |
| 72h | 4.72E-09  | 2.63E-09 | 1.17E-08 | 8.80E-10 |
|     | cgd4_4450 |          |          |          |
| 2h  | 1.32E-08  | 0.00E+00 | 0.00E+00 | 5.14E-08 |
| 6h  | 0.00E+00  | 0.00E+00 | 1.17E-07 | 2.93E-08 |
| 12h | 2.04E-06  | 1.43E-06 | 6.33E-06 | 8.27E-06 |
| 24h | 3.63E-07  | 3.08E-07 | 5.84E-06 | 9.29E-06 |
| 36h | 2.84E-06  | 2.81E-06 | 2.30E-05 | 1.70E-05 |
| 48h | 2.55E-06  | 4.09E-06 | 1.06E-05 | 1.81E-05 |
| 72h | 8.73E-07  | 9.20E-07 | 5.74E-06 | 3.98E-07 |
|     | cgd4_4460 |          |          |          |
| 2h  | 4.68E-07  | 4.13E-08 | 1.42E-07 | 6.39E-07 |
| 6h  | 4.00E-07  | 5.33E-07 | 3.78E-06 | 5.08E-06 |
| 12h | 1.46E-07  | 4.58E-07 | 3.90E-07 | 1.02E-06 |
| 24h | 2.12E-07  | 1.38E-07 | 2.91E-06 | 5.46E-06 |

|     |           |          |          |          |
|-----|-----------|----------|----------|----------|
| 36h | 9.81E-07  | 9.91E-07 | 2.22E-06 | 2.92E-06 |
| 48h | 8.16E-07  | 9.99E-07 | 1.41E-06 | 2.79E-06 |
| 72h | 6.80E-08  | 6.24E-08 | 1.71E-07 | 5.58E-08 |
|     | cgd4_4470 |          |          |          |
| 2h  | 0.00E+00  | 0.00E+00 | 1.33E-08 | 3.43E-03 |
| 6h  | 1.22E-08  | 4.08E-09 | 3.96E-09 | 3.96E-06 |
| 12h | 1.99E-08  | 7.63E-08 | 1.48E-08 | 1.22E-05 |
| 24h | 2.81E-08  | 2.05E-08 | 2.62E-07 | 4.64E-05 |
| 36h | 1.06E-07  | 7.11E-08 | 3.83E-07 | 1.05E-05 |
| 48h | 7.50E-08  | 1.22E-07 | 2.17E-07 | 3.52E-05 |
| 72h | 4.25E-09  | 2.60E-09 | 3.53E-08 | 2.79E-04 |
|     | cgd4_4480 |          |          |          |
| 2h  | 0.00E+00  | 0.00E+00 | 0.00E+00 | 0.00E+00 |
| 6h  | 0.00E+00  | 0.00E+00 | 0.00E+00 | 0.00E+00 |
| 12h | 4.69E-08  | 4.52E-08 | 1.75E-07 | 7.42E-08 |
| 24h | 5.08E-09  | 7.23E-09 | 1.83E-08 | 4.23E-08 |
| 36h | 1.11E-08  | 1.18E-08 | 9.20E-08 | 6.17E-08 |
| 48h | 1.78E-09  | 5.18E-09 | 4.01E-09 | 1.92E-08 |
| 72h | 2.13E-10  | 4.27E-10 | 8.66E-10 | 2.55E-09 |
|     | cgd4_4500 |          |          |          |
| 2h  | 3.17E-05  | 4.68E-03 | 1.19E-04 | 1.13E-04 |
| 6h  | 7.35E-06  | 3.70E-04 | 6.11E-05 | 2.19E-05 |
| 12h | 4.49E-05  | 1.52E-04 | 1.95E-04 | 9.54E-05 |
| 24h | 1.39E-05  | 1.44E-05 | 1.04E-04 | 5.65E-05 |
| 36h | 5.88E-06  | 1.26E-05 | 7.81E-05 | 2.83E-05 |
| 48h | 3.03E-06  | 1.09E-05 | 4.11E-05 | 1.55E-05 |
| 72h | 2.85E-06  | 2.77E-05 | 3.04E-05 | 4.05E-06 |
|     | cgd5_20   |          |          |          |
| 2h  | 2.44E-09  | 0.00E+00 | 3.02E-09 | 1.68E-08 |
| 6h  | 2.86E-09  | 2.42E-09 | 1.09E-08 | 0.00E+00 |
| 12h | 6.83E-07  | 2.43E-07 | 2.96E-06 | 2.61E-06 |
| 24h | 2.06E-07  | 1.99E-07 | 7.03E-07 | 3.18E-07 |
| 36h | 1.25E-07  | 7.43E-08 | 1.50E-06 | 5.85E-07 |
| 48h | 3.38E-08  | 2.41E-08 | 1.28E-07 | 1.02E-07 |
| 72h | 2.48E-08  | 2.58E-09 | 2.45E-08 | 1.09E-08 |
|     | cgd5_30   |          |          |          |
| 2h  | 1.04E-06  | 1.10E-06 | 4.29E-06 | 3.63E-06 |
| 6h  | 4.52E-07  | 9.60E-07 | 1.56E-06 | 2.27E-06 |
| 12h | 2.73E-06  | 7.83E-07 | 1.07E-05 | 7.72E-06 |
| 24h | 1.95E-06  | 1.05E-06 | 1.69E-06 | 1.94E-06 |
| 36h | 3.17E-07  | 4.71E-07 | 2.15E-06 | 1.30E-06 |
| 48h | 5.86E-07  | 1.29E-07 | 4.55E-07 | 5.98E-07 |
| 72h | 2.75E-07  | 1.19E-07 | 5.12E-07 | 1.51E-07 |
|     | cgd5_40   |          |          |          |
| 2h  | 7.30E-07  | 5.56E-07 | 4.00E-06 | 3.67E-06 |
| 6h  | 8.00E-07  | 9.65E-07 | 1.11E-06 | 1.66E-06 |
| 12h | 2.55E-06  | 5.84E-07 | 1.28E-05 | 1.28E-05 |
| 24h | 2.61E-06  | 6.38E-07 | 1.55E-06 | 1.63E-06 |
| 36h | 2.41E-07  | 4.67E-07 | 2.44E-06 | 2.79E-06 |
| 48h | 4.49E-07  | 9.68E-08 | 7.50E-07 | 7.91E-07 |
| 72h | 8.53E-08  | 2.60E-07 | 5.52E-07 | 5.33E-07 |
|     | cgd5_50   |          |          |          |
| 2h  | 0.00E+00  | 0.00E+00 | 0.00E+00 | 0.00E+00 |

|     |          |          |          |          |
|-----|----------|----------|----------|----------|
| 6h  | 1.51E-08 | 2.20E-09 | 1.52E-08 | 1.87E-08 |
| 12h | 1.15E-07 | 7.95E-08 | 7.49E-07 | 5.26E-07 |
| 24h | 9.26E-08 | 1.63E-08 | 7.04E-08 | 2.16E-07 |
| 36h | 1.21E-07 | 1.73E-07 | 7.86E-07 | 5.92E-07 |
| 48h | 1.75E-07 | 1.11E-07 | 3.68E-07 | 4.35E-07 |
| 72h | 6.05E-08 | 9.10E-08 | 2.67E-07 | 3.28E-07 |
|     | cgd5_60  |          |          |          |
| 2h  | 2.86E-07 | 2.08E-07 | 4.61E-08 | 0.00E+00 |
| 6h  | 8.71E-07 | 8.07E-07 | 7.44E-06 | 5.75E-06 |
| 12h | 5.41E-06 | 4.01E-06 | 4.45E-05 | 2.93E-05 |
| 24h | 1.42E-06 | 6.62E-07 | 3.73E-06 | 4.00E-06 |
| 36h | 1.99E-06 | 5.26E-06 | 1.69E-05 | 1.30E-05 |
| 48h | 1.58E-06 | 7.49E-07 | 3.84E-06 | 3.75E-06 |
| 72h | 1.17E-06 | 1.23E-06 | 2.53E-06 | 1.23E-06 |
|     | cgd5_70  |          |          |          |
| 2h  | 0.00E+00 | 1.97E-07 | 9.50E-08 | 2.84E-07 |
| 6h  | 0.00E+00 | 4.43E-08 | 2.17E-07 | 2.07E-08 |
| 12h | 8.62E-07 | 7.54E-07 | 1.45E-05 | 8.59E-06 |
| 24h | 3.56E-07 | 2.46E-07 | 6.18E-07 | 1.03E-06 |
| 36h | 4.00E-07 | 6.27E-07 | 5.25E-06 | 6.13E-06 |
| 48h | 4.31E-07 | 4.41E-07 | 1.21E-06 | 1.13E-06 |
| 72h | 3.58E-07 | 1.28E-07 | 1.84E-07 | 2.60E-07 |
|     | cgd5_80  |          |          |          |
| 2h  | 0.00E+00 | 0.00E+00 | 0.00E+00 | 0.00E+00 |
| 6h  | 0.00E+00 | 0.00E+00 | 0.00E+00 | 0.00E+00 |
| 12h | 7.92E-09 | 1.92E-09 | 0.00E+00 | 1.73E-09 |
| 24h | 4.98E-09 | 0.00E+00 | 9.98E-10 | 1.21E-09 |
| 36h | 1.88E-08 | 3.11E-08 | 3.52E-08 | 1.40E-08 |
| 48h | 6.81E-07 | 4.44E-07 | 7.95E-07 | 4.95E-07 |
| 72h | 3.42E-08 | 1.17E-08 | 2.00E-09 | 3.96E-08 |
|     | cgd5_100 |          |          |          |
| 2h  | 4.91E-07 | 6.07E-06 | 1.08E-05 | 5.80E-06 |
| 6h  | 1.95E-07 | 5.39E-08 | 1.12E-06 | 3.98E-07 |
| 12h | 6.87E-07 | 4.13E-07 | 1.37E-05 | 1.30E-05 |
| 24h | 8.93E-07 | 5.22E-07 | 1.27E-06 | 2.96E-06 |
| 36h | 3.66E-07 | 3.06E-07 | 1.45E-06 | 1.55E-06 |
| 48h | 1.80E-07 | 2.53E-07 | 1.07E-06 | 1.52E-06 |
| 72h | 1.28E-07 | 6.00E-08 | 1.31E-07 | 9.16E-08 |
|     | cgd5_110 |          |          |          |
| 2h  | 4.09E-05 | 2.11E-04 | 7.08E-06 | 2.10E-07 |
| 6h  | 1.97E-05 | 3.81E-05 | 4.35E-05 | 2.26E-05 |
| 12h | 1.09E-06 | 2.94E-05 | 1.98E-06 | 4.55E-05 |
| 24h | 2.10E-05 | 7.00E-05 | 7.12E-05 | 2.28E-05 |
| 36h | 7.09E-05 | 1.08E-04 | 9.99E-06 | 7.20E-06 |
| 48h | 1.72E-04 | 1.47E-04 | 3.98E-05 | 5.53E-05 |
| 72h | 1.35E-05 | 1.01E-04 | 4.50E-06 | 7.95E-06 |
|     | cgd5_120 |          |          |          |
| 2h  | 7.90E-09 | 3.60E-07 | 9.59E-08 | 3.93E-07 |
| 6h  | 3.07E-09 | 3.89E-09 | 3.77E-08 | 8.12E-08 |
| 12h | 1.49E-08 | 1.66E-08 | 1.71E-07 | 6.17E-08 |
| 24h | 6.20E-09 | 1.33E-08 | 3.48E-08 | 9.51E-08 |
| 36h | 2.03E-08 | 1.52E-08 | 3.24E-08 | 1.10E-08 |
| 48h | 2.45E-08 | 1.65E-08 | 3.93E-08 | 4.58E-08 |

|     |          |          |          |          |
|-----|----------|----------|----------|----------|
| 72h | 1.58E-08 | 6.88E-09 | 3.60E-08 | 7.19E-09 |
|     | cgd5_130 |          |          |          |
| 2h  | 1.23E-08 | 3.82E-08 | 1.46E-08 | 4.65E-08 |
| 6h  | 3.70E-08 | 5.80E-08 | 1.75E-06 | 2.84E-07 |
| 12h | 1.40E-08 | 1.27E-08 | 5.78E-07 | 8.15E-07 |
| 24h | 1.40E-08 | 3.19E-08 | 9.16E-08 | 3.09E-07 |
| 36h | 1.84E-07 | 5.51E-08 | 2.70E-07 | 1.54E-07 |
| 48h | 2.56E-08 | 1.79E-08 | 1.16E-07 | 1.24E-07 |
| 72h | 2.55E-08 | 4.06E-09 | 1.57E-08 | 1.77E-08 |
|     | cgd5_150 |          |          |          |
| 2h  | 1.07E-07 | 2.09E-07 | 2.84E-07 | 7.00E-07 |
| 6h  | 1.73E-08 | 1.91E-07 | 1.57E-06 | 6.63E-07 |
| 12h | 9.36E-09 | 3.64E-09 | 4.90E-07 | 2.88E-07 |
| 24h | 2.20E-08 | 1.66E-07 | 7.07E-07 | 5.61E-07 |
| 36h | 1.37E-07 | 1.31E-07 | 1.75E-06 | 4.27E-07 |
| 48h | 7.58E-08 | 6.91E-08 | 1.21E-06 | 2.13E-07 |
| 72h | 1.26E-07 | 7.78E-08 | 1.90E-06 | 8.40E-08 |
|     | cgd2_140 |          |          |          |
| 2h  | 1.54E-07 | 1.97E-08 | 2.72E-07 | 5.15E-07 |
| 6h  | 2.37E-07 | 1.53E-07 | 8.64E-08 | 1.93E-06 |
| 12h | 6.72E-08 | 2.70E-08 | 5.77E-08 | 5.64E-07 |
| 24h | 1.37E-07 | 7.44E-08 | 1.17E-06 | 5.35E-07 |
| 36h | 1.02E-07 | 7.43E-08 | 3.68E-07 | 2.50E-07 |
| 48h | 8.01E-08 | 3.02E-08 | 8.38E-07 | 7.04E-07 |
| 72h | 3.29E-08 | 2.39E-08 | 1.13E-07 | 7.74E-08 |
|     | cgd2_160 |          |          |          |
| 2h  | 1.33E-08 | 1.21E-09 | 3.77E-07 | 1.17E-07 |
| 6h  | 1.05E-08 | 2.73E-08 | 2.04E-09 | 6.13E-09 |
| 12h | 1.92E-08 | 4.71E-08 | 7.22E-08 | 3.25E-07 |
| 24h | 5.18E-08 | 9.66E-08 | 4.10E-07 | 1.79E-07 |
| 36h | 9.65E-06 | 3.87E-08 | 1.92E-07 | 8.03E-08 |
| 48h | 7.93E-08 | 4.09E-08 | 4.91E-07 | 9.88E-08 |
| 72h | 5.26E-08 | 3.84E-08 | 2.93E-07 | 5.54E-08 |
|     | cgd2_180 |          |          |          |
| 2h  | 6.57E-06 | 3.16E-06 | 5.36E-05 | 2.21E-05 |
| 6h  | 4.45E-06 | 1.67E-05 | 5.08E-05 | 8.43E-05 |
| 12h | 4.34E-07 | 3.06E-07 | 4.75E-06 | 2.12E-05 |
| 24h | 3.58E-06 | 2.37E-06 | 1.51E-04 | 3.09E-05 |
| 36h | 3.37E-06 | 3.41E-06 | 6.36E-05 | 1.74E-05 |
| 48h | 1.33E-06 | 9.09E-07 | 9.00E-05 | 1.56E-05 |
| 72h | 1.14E-06 | 1.17E-06 | 3.48E-05 | 4.47E-06 |
|     | cgd2_240 |          |          |          |
| 2h  | 0.00E+00 | 0.00E+00 | 0.00E+00 | 0.00E+00 |
| 6h  | 0.00E+00 | 1.37E-09 | 3.12E-09 | 0.00E+00 |
| 12h | 1.06E-06 | 3.02E-07 | 3.35E-07 | 2.73E-06 |
| 24h | 5.12E-08 | 2.47E-08 | 6.44E-08 | 9.59E-08 |
| 36h | 2.12E-07 | 8.99E-07 | 2.02E-06 | 1.61E-06 |
| 48h | 2.62E-07 | 1.74E-07 | 1.37E-06 | 3.00E-07 |
| 72h | 1.05E-06 | 1.67E-07 | 1.62E-06 | 7.75E-07 |
|     | cgd2_250 |          |          |          |
| 2h  | 3.13E-06 | 2.94E-06 | 3.75E-06 | 6.46E-06 |
| 6h  | 1.54E-05 | 1.18E-06 | 2.74E-06 | 1.29E-05 |
| 12h | 2.76E-06 | 1.61E-06 | 1.69E-06 | 9.75E-06 |

|     |          |          |          |          |
|-----|----------|----------|----------|----------|
| 24h | 9.04E-07 | 6.62E-07 | 5.51E-06 | 5.62E-05 |
| 36h | 2.47E-06 | 9.10E-07 | 3.98E-06 | 4.67E-06 |
| 48h | 3.94E-07 | 2.93E-07 | 2.53E-06 | 1.08E-06 |
| 72h | 5.09E-07 | 8.50E-08 | 1.10E-06 | 4.96E-07 |
|     | cgd2_260 |          |          |          |
| 2h  | 1.25E-07 | 4.65E-08 | 1.32E-06 | 4.22E-06 |
| 6h  | 0.00E+00 | 1.37E-08 | 1.65E-08 | 4.91E-08 |
| 12h | 8.85E-07 | 7.44E-07 | 1.52E-06 | 4.32E-06 |
| 24h | 9.37E-08 | 1.59E-07 | 7.95E-07 | 1.72E-07 |
| 36h | 1.58E-07 | 1.38E-06 | 1.18E-06 | 5.21E-07 |
| 48h | 3.67E-07 | 6.77E-08 | 8.69E-07 | 7.86E-07 |
| 72h | 1.61E-07 | 6.52E-08 | 7.96E-07 | 2.54E-07 |
|     | cgd2_290 |          |          |          |
| 2h  | 5.02E-08 | 0.00E+00 | 2.64E-08 | 1.37E-07 |
| 6h  | 7.21E-09 | 0.00E+00 | 3.85E-08 | 8.32E-09 |
| 12h | 8.96E-08 | 2.48E-07 | 3.99E-07 | 3.15E-06 |
| 24h | 2.62E-07 | 4.43E-07 | 2.32E-06 | 1.21E-06 |
| 36h | 2.18E-06 | 1.46E-06 | 1.15E-05 | 6.90E-06 |
| 48h | 2.19E-06 | 1.42E-06 | 7.30E-06 | 4.10E-06 |
| 72h | 7.85E-07 | 6.17E-07 | 1.40E-05 | 1.19E-06 |
|     | cgd2_320 |          |          |          |
| 2h  | 1.05E-04 | 4.52E-04 | 5.19E-05 | 2.76E-05 |
| 6h  | 1.36E-04 | 4.89E-05 | 1.26E-04 | 4.72E-04 |
| 12h | 1.84E-05 | 2.75E-06 | 2.97E-05 | 3.50E-05 |
| 24h | 2.39E-05 | 8.08E-05 | 1.24E-04 | 6.48E-05 |
| 36h | 1.57E-05 | 7.30E-06 | 1.36E-04 | 3.75E-05 |
| 48h | 2.75E-05 | 1.04E-05 | 8.15E-05 | 4.06E-05 |
| 72h | 1.49E-05 | 1.51E-05 | 1.44E-04 | 1.74E-04 |
|     | cgd2_330 |          |          |          |
| 2h  | 8.18E-07 | 2.75E-07 | 1.27E-06 | 2.42E-06 |
| 6h  | 1.98E-07 | 1.20E-07 | 3.10E-07 | 3.19E-07 |
| 12h | 2.85E-07 | 5.35E-08 | 3.29E-07 | 3.25E-06 |
| 24h | 2.87E-07 | 1.15E-04 | 5.97E-07 | 4.58E-07 |
| 36h | 2.43E-07 | 8.71E-08 | 8.54E-07 | 5.31E-07 |
| 48h | 2.21E-07 | 9.86E-08 | 4.66E-07 | 5.62E-07 |
| 72h | 2.27E-08 | 0.00E+00 | 8.11E-07 | 4.88E-08 |
|     | cgd2_340 |          |          |          |
| 2h  | 7.41E-07 | 1.26E-07 | 7.36E-07 | 2.16E-06 |
| 6h  | 0.00E+00 | 0.00E+00 | 2.83E-09 | 0.00E+00 |
| 12h | 9.56E-07 | 3.02E-07 | 1.45E-06 | 5.83E-06 |
| 24h | 5.10E-07 | 5.78E-07 | 3.41E-07 | 1.02E-06 |
| 36h | 5.36E-08 | 4.34E-08 | 9.33E-07 | 5.03E-07 |
| 48h | 4.90E-08 | 4.70E-08 | 3.31E-07 | 2.68E-07 |
| 72h | 2.21E-09 | 5.42E-09 | 4.52E-07 | 2.49E-08 |
|     | cgd2_370 |          |          |          |
| 2h  | 0.00E+00 | 0.00E+00 | 0.00E+00 | 2.46E-08 |
| 6h  | 0.00E+00 | 0.00E+00 | 0.00E+00 | 0.00E+00 |
| 12h | 1.01E-05 | 4.12E-06 | 4.10E-06 | 1.71E-05 |
| 24h | 1.17E-06 | 8.24E-07 | 8.68E-07 | 8.66E-07 |
| 36h | 3.36E-07 | 2.08E-07 | 1.25E-05 | 2.55E-06 |
| 48h | 2.28E-07 | 1.49E-07 | 1.60E-06 | 1.26E-06 |
| 72h | 3.74E-08 | 8.70E-09 | 1.15E-06 | 2.78E-08 |
|     | cgd2_390 |          |          |          |

|     |          |          |          |          |
|-----|----------|----------|----------|----------|
| 2h  | 3.10E-08 | 6.76E-08 | 1.74E-07 | 7.63E-08 |
| 6h  | 1.42E-07 | 5.38E-08 | 1.01E-06 | 4.25E-07 |
| 12h | 7.87E-07 | 3.12E-07 | 4.78E-06 | 2.15E-06 |
| 24h | 1.60E-07 | 1.55E-07 | 9.12E-07 | 2.77E-07 |
| 36h | 1.97E-07 | 1.01E-07 | 1.14E-05 | 1.15E-06 |
| 48h | 3.64E-07 | 1.14E-07 | 4.25E-06 | 6.21E-07 |
| 72h | 4.65E-08 | 2.76E-08 | 8.82E-07 | 9.59E-08 |
|     | cgd1_200 |          |          |          |
| 2h  | 0.00E+00 | 0.00E+00 | 8.33E-08 | 0.00E+00 |
| 6h  | 0.00E+00 | 5.15E-09 | 0.00E+00 | 0.00E+00 |
| 12h | 0.00E+00 | 6.32E-08 | 1.20E-07 | 5.89E-09 |
| 24h | 4.85E-08 | 3.21E-08 | 2.03E-07 | 5.40E-08 |
| 36h | 1.85E-07 | 4.42E-08 | 6.21E-07 | 3.36E-07 |
| 48h | 1.41E-07 | 7.16E-08 | 6.00E-07 | 2.47E-07 |
| 72h | 1.08E-07 | 1.13E-07 | 1.89E-07 | 2.14E-07 |
|     | cgd1_210 |          |          |          |
| 2h  | 2.32E-04 | 3.59E-05 | 0.00E+00 | 0.00E+00 |
| 6h  | 1.96E-05 | 4.27E-05 | 3.91E-04 | 0.00E+00 |
| 12h | 2.36E-04 | 1.25E-03 | 3.00E-04 | 7.67E-04 |
| 24h | 5.51E-05 | 2.77E-04 | 6.48E-04 | 9.26E-04 |
| 36h | 3.82E-04 | 5.09E-04 | 2.29E-03 | 2.66E-03 |
| 48h | 2.22E-04 | 1.75E-04 | 9.60E-04 | 4.41E-04 |
| 72h | 1.20E-04 | 1.70E-04 | 4.13E-04 | 5.09E-04 |
|     | cgd1_220 |          |          |          |
| 2h  | 0.00E+00 | 0.00E+00 | 0.00E+00 | 0.00E+00 |
| 6h  | 3.18E-08 | 9.22E-08 | 1.35E-07 | 9.29E-07 |
| 12h | 1.83E-08 | 2.55E-09 | 2.27E-09 | 1.85E-08 |
| 24h | 2.73E-08 | 1.39E-08 | 1.92E-07 | 6.00E-07 |
| 36h | 1.79E-07 | 5.07E-08 | 4.38E-07 | 5.06E-07 |
| 48h | 6.67E-08 | 2.82E-08 | 1.50E-07 | 1.42E-07 |
| 72h | 4.06E-08 | 4.22E-08 | 1.32E-07 | 8.75E-08 |
|     | cgd1_230 |          |          |          |
| 2h  | 6.03E-09 | 2.50E-09 | 0.00E+00 | 0.00E+00 |
| 6h  | 3.38E-08 | 1.17E-09 | 7.79E-08 | 1.81E-07 |
| 12h | 8.69E-09 | 6.25E-09 | 5.15E-09 | 5.00E-09 |
| 24h | 9.09E-09 | 3.50E-09 | 3.87E-08 | 7.69E-08 |
| 36h | 1.89E-07 | 5.44E-08 | 3.85E-07 | 2.12E-07 |
| 48h | 2.47E-08 | 1.76E-08 | 7.19E-08 | 7.57E-08 |
| 72h | 1.09E-07 | 8.49E-08 | 3.92E-07 | 3.11E-07 |
|     | cgd1_240 |          |          |          |
| 2h  | 6.85E-06 | 6.82E-07 | 4.64E-05 | 0.00E+00 |
| 6h  | 1.52E-06 | 1.72E-05 | 8.15E-06 | 2.91E-06 |
| 12h | 3.18E-05 | 3.39E-06 | 3.25E-05 | 3.58E-06 |
| 24h | 1.06E-04 | 4.73E-06 | 6.24E-05 | 2.07E-04 |
| 36h | 4.13E-05 | 3.14E-05 | 1.79E-04 | 1.34E-04 |
| 48h | 5.82E-05 | 2.21E-05 | 8.82E-05 | 5.26E-05 |
| 72h | 1.60E-04 | 1.26E-05 | 2.38E-05 | 6.58E-06 |
|     | cgd1_250 |          |          |          |
| 2h  | 2.42E-07 | 4.79E-07 | 1.17E-06 | 4.49E-08 |
| 6h  | 0.00E+00 | 9.01E-09 | 4.58E-08 | 0.00E+00 |
| 12h | 1.24E-07 | 2.09E-08 | 2.36E-07 | 1.86E-07 |
| 24h | 1.48E-07 | 6.23E-08 | 9.09E-08 | 5.57E-07 |
| 36h | 2.58E-07 | 2.34E-07 | 8.76E-07 | 7.16E-07 |



|     |          |          |          |          |
|-----|----------|----------|----------|----------|
| 48h | 2.84E-07 | 1.49E-07 | 3.42E-07 | 3.65E-07 |
| 72h | 7.61E-08 | 2.11E-07 | 6.94E-07 | 5.80E-07 |
|     | cgd1_260 |          |          |          |
| 2h  | 0.00E+00 | 0.00E+00 | 0.00E+00 | 0.00E+00 |
| 6h  | 0.00E+00 | 0.00E+00 | 3.34E-09 | 0.00E+00 |
| 12h | 1.06E-09 | 4.28E-10 | 0.00E+00 | 0.00E+00 |
| 24h | 1.94E-08 | 1.16E-09 | 2.02E-09 | 5.61E-08 |
| 36h | 2.77E-08 | 3.61E-08 | 1.43E-07 | 8.05E-08 |
| 48h | 1.62E-07 | 9.00E-08 | 6.97E-08 | 3.55E-07 |
| 72h | 9.31E-08 | 6.48E-08 | 2.99E-07 | 4.54E-08 |
|     | cgd1_270 |          |          |          |
| 2h  | 4.60E-07 | 2.69E-07 | 7.55E-07 | 1.28E-06 |
| 6h  | 3.74E-07 | 1.21E-07 | 4.89E-07 | 3.29E-06 |
| 12h | 1.36E-08 | 5.01E-08 | 1.74E-07 | 2.15E-07 |
| 24h | 6.12E-08 | 2.83E-08 | 3.42E-07 | 6.47E-06 |
| 36h | 2.71E-07 | 1.60E-07 | 5.77E-07 | 5.09E-07 |
| 48h | 4.06E-07 | 1.24E-07 | 5.44E-07 | 8.12E-07 |
| 72h | 4.78E-08 | 5.26E-08 | 1.16E-07 | 6.06E-08 |
|     | cgd1_280 |          |          |          |
| 2h  | 4.33E-08 | 4.93E-08 | 3.08E-07 | 0.00E+00 |
| 6h  | 1.32E-07 | 3.81E-08 | 5.80E-08 | 7.70E-07 |
| 12h | 2.23E-07 | 7.81E-08 | 1.46E-07 | 1.52E-07 |
| 24h | 1.18E-07 | 3.46E-08 | 4.10E-07 | 8.70E-07 |
| 36h | 6.66E-07 | 2.72E-07 | 1.20E-06 | 7.33E-07 |
| 48h | 1.64E-06 | 9.46E-07 | 1.53E-06 | 1.58E-06 |
| 72h | 1.68E-07 | 1.07E-07 | 2.36E-07 | 1.74E-07 |
|     | cgd1_370 |          |          |          |
| 2h  | 9.58E-04 | 3.52E-04 | 2.28E-03 | 3.24E-04 |
| 6h  | 4.58E-04 | 3.24E-04 | 7.45E-04 | 1.08E-02 |
| 12h | 5.17E-04 | 1.82E-04 | 4.24E-04 | 8.84E-04 |
| 24h | 1.46E-04 | 5.55E-04 | 1.15E-03 | 1.89E-03 |
| 36h | 5.57E-04 | 3.86E-04 | 3.44E-03 | 1.63E-03 |
| 48h | 4.32E-04 | 6.06E-04 | 1.39E-03 | 2.72E-03 |
| 72h | 1.87E-04 | 4.51E-04 | 9.61E-04 | 1.32E-03 |
|     | cgd1_380 |          |          |          |
| 2h  | 0.00E+00 | 0.00E+00 | 0.00E+00 | 0.00E+00 |
| 6h  | 0.00E+00 | 1.54E-09 | 0.00E+00 | 1.03E-06 |
| 12h | 8.69E-08 | 1.22E-08 | 1.80E-08 | 9.43E-08 |
| 24h | 1.93E-07 | 2.47E-07 | 7.96E-07 | 3.45E-06 |
| 36h | 2.01E-06 | 3.19E-06 | 7.69E-06 | 3.02E-06 |
| 48h | 4.49E-06 | 2.26E-06 | 7.65E-06 | 4.57E-06 |
| 72h | 3.12E-06 | 5.85E-07 | 8.45E-06 | 2.11E-06 |
|     | cgd1_390 |          |          |          |
| 2h  | 0.00E+00 | 0.00E+00 | 0.00E+00 | 0.00E+00 |
| 6h  | 0.00E+00 | 0.00E+00 | 0.00E+00 | 0.00E+00 |
| 12h | 2.95E-06 | 9.43E-07 | 2.53E-06 | 7.78E-07 |
| 24h | 3.70E-08 | 2.59E-07 | 1.72E-07 | 6.65E-07 |
| 36h | 1.42E-06 | 1.91E-07 | 1.22E-05 | 6.80E-06 |
| 48h | 3.59E-07 | 5.83E-07 | 2.56E-07 | 7.86E-07 |
| 72h | 1.30E-07 | 5.43E-08 | 7.57E-08 | 7.91E-07 |
|     | cgd1_400 |          |          |          |
| 2h  | 0.00E+00 | 0.00E+00 | 0.00E+00 | 0.00E+00 |
| 6h  | 0.00E+00 | 5.66E-08 | 3.33E-09 | 3.91E-09 |

|     |          |          |          |          |
|-----|----------|----------|----------|----------|
| 12h | 3.57E-08 | 4.58E-08 | 1.17E-07 | 2.99E-07 |
| 24h | 1.39E-07 | 1.78E-08 | 5.97E-07 | 8.37E-08 |
| 36h | 8.34E-08 | 8.28E-08 | 8.16E-07 | 3.99E-07 |
| 48h | 2.24E-07 | 1.07E-07 | 4.78E-07 | 3.72E-07 |
| 72h | 5.69E-08 | 5.85E-08 | 7.94E-07 | 1.09E-07 |
|     | cgd1_410 |          |          |          |
| 2h  | 1.62E-08 | 0.00E+00 | 0.00E+00 | 0.00E+00 |
| 6h  | 2.68E-08 | 6.24E-07 | 3.91E-07 | 1.22E-06 |
| 12h | 9.66E-08 | 2.87E-08 | 8.34E-08 | 2.57E-07 |
| 24h | 6.22E-08 | 4.04E-08 | 1.01E-06 | 7.38E-07 |
| 36h | 3.43E-07 | 8.96E-08 | 1.33E-06 | 5.77E-07 |
| 48h | 1.10E-07 | 5.20E-08 | 3.07E-07 | 3.13E-07 |
| 72h | 6.04E-08 | 5.08E-08 | 4.40E-07 | 1.12E-07 |
|     | cgd1_420 |          |          |          |
| 2h  | 1.79E-08 | 3.30E-09 | 6.07E-08 | 0.00E+00 |
| 6h  | 1.92E-08 | 5.55E-08 | 6.17E-08 | 2.22E-07 |
| 12h | 0.00E+00 | 0.00E+00 | 0.00E+00 | 3.97E-09 |
| 24h | 6.18E-09 | 3.02E-09 | 2.90E-08 | 4.54E-08 |
| 36h | 2.25E-08 | 7.92E-09 | 1.24E-07 | 5.86E-08 |
| 48h | 2.10E-08 | 1.03E-08 | 2.11E-08 | 2.20E-08 |
| 72h | 2.57E-08 | 3.48E-08 | 2.18E-07 | 8.91E-08 |
|     | cgd1_430 |          |          |          |
| 2h  | 1.82E-07 | 1.14E-07 | 6.62E-06 | 9.31E-07 |
| 6h  | 5.16E-08 | 1.42E-08 | 2.62E-06 | 1.43E-06 |
| 12h | 8.08E-07 | 5.19E-08 | 2.64E-07 | 4.83E-07 |
| 24h | 2.46E-07 | 3.52E-07 | 2.34E-06 | 3.73E-06 |
| 36h | 2.25E-06 | 1.46E-06 | 5.76E-06 | 4.61E-06 |
| 48h | 1.83E-06 | 2.13E-06 | 1.16E-05 | 5.77E-06 |
| 72h | 4.04E-06 | 2.72E-06 | 2.38E-05 | 6.75E-06 |
|     | cgd1_440 |          |          |          |
| 2h  | 0.00E+00 | 0.00E+00 | 0.00E+00 | 0.00E+00 |
| 6h  | 0.00E+00 | 1.27E-09 | 6.11E-09 | 7.07E-09 |
| 12h | 3.18E-07 | 1.31E-07 | 2.97E-07 | 9.52E-07 |
| 24h | 1.06E-08 | 1.57E-08 | 2.40E-08 | 1.34E-08 |
| 36h | 4.98E-08 | 2.18E-08 | 2.95E-07 | 3.86E-07 |
| 48h | 1.62E-08 | 4.17E-09 | 3.02E-08 | 3.39E-08 |
| 72h | 6.97E-09 | 2.98E-08 | 1.45E-07 | 2.35E-08 |
|     | cgd1_450 |          |          |          |
| 2h  | 1.63E-07 | 0.00E+00 | 0.00E+00 | 1.17E-07 |
| 6h  | 0.00E+00 | 0.00E+00 | 0.00E+00 | 0.00E+00 |
| 12h | 1.88E-04 | 7.61E-05 | 1.75E-03 | 1.08E-03 |
| 24h | 6.54E-05 | 3.14E-05 | 1.03E-04 | 2.94E-05 |
| 36h | 5.45E-05 | 2.32E-05 | 4.84E-04 | 4.29E-04 |
| 48h | 1.46E-04 | 9.27E-06 | 4.37E-05 | 1.50E-05 |
| 72h | 1.29E-06 | 5.45E-06 | 8.95E-06 | 2.38E-05 |
|     | cgd1_460 |          |          |          |
| 2h  | 0.00E+00 | 0.00E+00 | 4.78E-08 | 0.00E+00 |
| 6h  | 6.89E-08 | 0.00E+00 | 2.92E-08 | 1.78E-07 |
| 12h | 5.08E-08 | 8.97E-08 | 1.86E-06 | 1.41E-06 |
| 24h | 3.50E-07 | 1.30E-07 | 8.22E-07 | 1.00E-06 |
| 36h | 1.40E-06 | 1.30E-06 | 3.84E-06 | 4.17E-06 |
| 48h | 7.49E-07 | 6.91E-07 | 3.22E-06 | 2.36E-06 |
| 72h | 3.44E-07 | 4.27E-07 | 3.39E-06 | 5.53E-07 |

|     |          |          |          |          |
|-----|----------|----------|----------|----------|
|     | cgd1_480 |          |          |          |
| 2h  | 4.14E-05 | 1.54E-02 | 1.23E-03 | 2.89E-04 |
| 6h  | 6.21E-04 | 4.07E-04 | 2.41E-04 | 3.23E-04 |
| 12h | 6.52E-04 | 4.53E-04 | 6.22E-04 | 5.49E-03 |
| 24h | 2.14E-04 | 1.36E-04 | 7.54E-04 | 2.66E-03 |
| 36h | 1.67E-04 | 1.35E-04 | 7.20E-04 | 7.73E-04 |
| 48h | 5.20E-05 | 2.05E-04 | 1.18E-04 | 4.58E-04 |
| 72h | 9.80E-05 | 1.42E-04 | 7.52E-04 | 4.09E-04 |
|     | cgd1_510 |          |          |          |
| 2h  | 5.43E-08 | 7.10E-08 | 6.89E-07 | 2.23E-07 |
| 6h  | 1.74E-08 | 2.67E-08 | 7.26E-08 | 3.07E-07 |
| 12h | 9.58E-08 | 2.36E-08 | 7.51E-07 | 5.51E-07 |
| 24h | 6.43E-08 | 5.89E-08 | 2.65E-07 | 4.06E-07 |
| 36h | 1.20E-07 | 1.18E-07 | 1.03E-06 | 7.10E-07 |
| 48h | 3.62E-07 | 1.30E-07 | 4.33E-07 | 5.86E-07 |
| 72h | 1.31E-07 | 2.08E-07 | 3.95E-07 | 2.84E-07 |
|     | cgd1_540 |          |          |          |
| 2h  | 1.07E-06 | 1.02E-06 | 5.78E-06 | 1.87E-06 |
| 6h  | 4.78E-07 | 1.28E-06 | 6.08E-06 | 4.62E-05 |
| 12h | 1.00E-06 | 8.59E-07 | 2.87E-06 | 7.19E-06 |
| 24h | 1.10E-06 | 1.48E-06 | 4.61E-06 | 6.31E-06 |
| 36h | 9.04E-07 | 9.72E-07 | 3.09E-06 | 1.31E-06 |
| 48h | 7.56E-07 | 8.65E-07 | 2.13E-06 | 2.83E-06 |
| 72h | 2.48E-07 | 1.90E-07 | 3.47E-07 | 1.90E-07 |
|     | cgd1_560 |          |          |          |
| 2h  | 2.04E-06 | 6.17E-08 | 0.00E+00 | 0.00E+00 |
| 6h  | 2.70E-06 | 4.02E-06 | 6.51E-05 | 2.04E-07 |
| 12h | 2.11E-06 | 2.06E-07 | 1.96E-05 | 8.81E-06 |
| 24h | 3.96E-06 | 2.17E-06 | 3.85E-05 | 1.60E-05 |
| 36h | 2.80E-05 | 1.81E-05 | 4.96E-04 | 4.06E-05 |
| 48h | 2.96E-05 | 5.65E-06 | 1.46E-04 | 4.39E-05 |
| 72h | 2.06E-05 | 1.90E-05 | 4.16E-04 | 1.82E-05 |
|     | cgd1_570 |          |          |          |
| 2h  | 0.00E+00 | 3.44E-07 | 0.00E+00 | 0.00E+00 |
| 6h  | 0.00E+00 | 3.74E-06 | 6.07E-05 | 1.26E-05 |
| 12h | 1.38E-03 | 6.43E-06 | 6.27E-05 | 1.72E-05 |
| 24h | 1.97E-05 | 2.51E-06 | 1.17E-04 | 1.72E-05 |
| 36h | 1.09E-03 | 2.34E-05 | 1.39E-04 | 3.37E-05 |
| 48h | 2.16E-03 | 4.89E-06 | 1.11E-04 | 7.93E-06 |
| 72h | 0.00E+00 | 1.41E-05 | 3.48E-04 | 5.32E-06 |
|     | cgd1_580 |          |          |          |
| 2h  | 2.54E-08 | 0.00E+00 | 2.62E-08 | 7.15E-08 |
| 6h  | 1.63E-06 | 4.28E-06 | 3.81E-06 | 3.68E-06 |
| 12h | 6.32E-07 | 2.28E-06 | 4.84E-06 | 1.13E-06 |
| 24h | 5.00E-07 | 2.33E-06 | 2.77E-06 | 9.83E-07 |
| 36h | 4.50E-07 | 5.20E-06 | 1.08E-06 | 3.71E-06 |
| 48h | 5.97E-07 | 1.15E-06 | 5.71E-06 | 1.49E-06 |
| 72h | 3.04E-07 | 1.18E-06 | 5.41E-07 | 1.14E-06 |
|     | cgd1_590 |          |          |          |
| 2h  | 5.18E-09 | 1.80E-08 | 1.18E-08 | 0.00E+00 |
| 6h  | 0.00E+00 | 0.00E+00 | 1.65E-08 | 0.00E+00 |
| 12h | 1.35E-06 | 1.07E-05 | 3.62E-06 | 2.24E-05 |
| 24h | 6.95E-07 | 2.92E-06 | 4.58E-06 | 1.34E-06 |

|     |          |          |          |          |
|-----|----------|----------|----------|----------|
| 36h | 8.52E-07 | 3.29E-05 | 2.60E-06 | 2.77E-05 |
| 48h | 8.82E-07 | 5.96E-06 | 6.90E-06 | 3.47E-06 |
| 72h | 1.62E-06 | 1.02E-05 | 9.43E-06 | 4.07E-06 |
|     | cgd1_610 |          |          |          |
| 2h  | 2.41E-07 | 1.75E-06 | 9.32E-07 | 5.29E-06 |
| 6h  | 3.13E-07 | 1.16E-06 | 1.16E-06 | 8.15E-07 |
| 12h | 2.02E-07 | 1.62E-06 | 3.17E-07 | 8.95E-06 |
| 24h | 1.85E-07 | 7.21E-07 | 2.17E-06 | 4.61E-07 |
| 36h | 1.29E-07 | 1.89E-06 | 4.81E-07 | 2.02E-06 |
| 48h | 6.88E-08 | 6.86E-07 | 4.80E-07 | 4.51E-07 |
| 72h | 8.90E-08 | 2.08E-07 | 4.83E-07 | 1.59E-07 |
|     | cgd1_620 |          |          |          |
| 2h  | 0.00E+00 | 5.86E-06 | 8.21E-07 | 0.00E+00 |
| 6h  | 0.00E+00 | 0.00E+00 | 0.00E+00 | 5.62E-06 |
| 12h | 3.37E-04 | 1.70E-03 | 2.50E-03 | 2.86E-03 |
| 24h | 2.88E-05 | 4.81E-05 | 2.48E-04 | 2.77E-04 |
| 36h | 1.32E-04 | 1.77E-03 | 4.64E-04 | 1.41E-03 |
| 48h | 6.58E-05 | 3.18E-04 | 3.20E-04 | 4.55E-04 |
| 72h | 1.14E-05 | 3.13E-05 | 6.37E-05 | 9.11E-06 |
|     | cgd1_650 |          |          |          |
| 2h  | 0.00E+00 | 0.00E+00 | 0.00E+00 | 0.00E+00 |
| 6h  | 0.00E+00 | 0.00E+00 | 0.00E+00 | 0.00E+00 |
| 12h | 7.34E-07 | 4.77E-06 | 4.67E-06 | 1.83E-05 |
| 24h | 1.25E-07 | 3.22E-07 | 4.59E-07 | 4.58E-07 |
| 36h | 3.54E-07 | 6.07E-06 | 7.62E-07 | 7.10E-06 |
| 48h | 5.80E-08 | 3.07E-07 | 3.34E-07 | 7.35E-07 |
| 72h | 1.02E-07 | 7.49E-08 | 9.00E-07 | 1.58E-07 |
|     | cgd1_660 |          |          |          |
| 2h  | 1.72E-09 | 0.00E+00 | 0.00E+00 | 0.00E+00 |
| 6h  | 3.61E-09 | 3.11E-08 | 2.89E-08 | 0.00E+00 |
| 12h | 5.98E-07 | 3.07E-07 | 4.48E-07 | 1.12E-07 |
| 24h | 7.58E-08 | 2.05E-08 | 2.90E-07 | 1.06E-07 |
| 36h | 7.83E-07 | 3.50E-06 | 2.66E-06 | 4.70E-06 |
| 48h | 1.78E-05 | 2.90E-05 | 4.34E-05 | 5.92E-05 |
| 72h | 1.02E-05 | 1.42E-05 | 4.79E-05 | 8.88E-06 |
|     | cgd1_670 |          |          |          |
| 2h  | 1.09E-06 | 2.13E-06 | 4.13E-06 | 4.42E-06 |
| 6h  | 3.53E-07 | 1.22E-06 | 4.74E-07 | 5.84E-07 |
| 12h | 2.56E-07 | 1.01E-06 | 9.50E-07 | 3.78E-06 |
| 24h | 1.42E-07 | 1.06E-06 | 7.06E-07 | 7.17E-07 |
| 36h | 3.89E-07 | 1.60E-06 | 1.05E-06 | 1.04E-06 |
| 48h | 4.83E-07 | 2.47E-06 | 1.04E-06 | 2.94E-06 |
| 72h | 3.28E-07 | 7.82E-07 | 2.79E-06 | 1.49E-07 |
|     | cgd1_680 |          |          |          |
| 2h  | 9.76E-08 | 6.94E-07 | 1.10E-06 | 1.86E-06 |
| 6h  | 1.47E-09 | 5.21E-09 | 5.13E-09 | 1.15E-08 |
| 12h | 1.85E-06 | 5.39E-06 | 7.56E-06 | 8.74E-06 |
| 24h | 9.40E-08 | 7.31E-07 | 9.06E-07 | 9.21E-07 |
| 36h | 2.39E-07 | 3.33E-06 | 7.92E-07 | 2.16E-06 |
| 48h | 9.82E-08 | 1.39E-06 | 4.41E-07 | 1.95E-06 |
| 72h | 4.35E-08 | 1.45E-07 | 3.44E-07 | 1.45E-07 |
|     | cgd1_690 |          |          |          |
| 2h  | 0.00E+00 | 8.31E-08 | 8.02E-08 | 2.92E-07 |

|     |          |          |          |          |
|-----|----------|----------|----------|----------|
| 6h  | 0.00E+00 | 0.00E+00 | 0.00E+00 | 0.00E+00 |
| 12h | 2.26E-09 | 3.91E-07 | 1.15E-07 | 1.65E-06 |
| 24h | 1.33E-07 | 4.39E-07 | 1.43E-06 | 4.87E-07 |
| 36h | 8.87E-07 | 1.88E-06 | 1.81E-06 | 3.46E-06 |
| 48h | 2.43E-06 | 1.38E-05 | 1.28E-05 | 3.22E-05 |
| 72h | 1.46E-06 | 4.72E-06 | 1.17E-05 | 3.01E-06 |
|     | cgd1_700 |          |          |          |
| 2h  | 2.64E-03 | 1.21E-02 | 1.50E-02 | 3.14E-03 |
| 6h  | 1.35E-03 | 6.87E-04 | 4.87E-03 | 6.58E-03 |
| 12h | 3.40E-04 | 2.13E-03 | 1.01E-03 | 3.56E-03 |
| 24h | 3.83E-04 | 3.22E-03 | 2.47E-03 | 5.61E-04 |
| 36h | 4.78E-04 | 5.12E-03 | 3.40E-03 | 1.32E-03 |
| 48h | 1.38E-04 | 3.71E-03 | 2.13E-03 | 1.08E-03 |
| 72h | 4.18E-04 | 1.43E-03 | 1.56E-03 | 5.88E-04 |
|     | cgd1_720 |          |          |          |
| 2h  | 0.00E+00 | 0.00E+00 | 0.00E+00 | 0.00E+00 |
| 6h  | 0.00E+00 | 0.00E+00 | 0.00E+00 | 0.00E+00 |
| 12h | 0.00E+00 | 0.00E+00 | 0.00E+00 | 0.00E+00 |
| 24h | 6.27E-10 | 1.92E-08 | 4.24E-09 | 1.74E-08 |
| 36h | 1.60E-08 | 8.40E-08 | 5.58E-08 | 4.55E-08 |
| 48h | 6.18E-07 | 2.65E-06 | 4.54E-06 | 4.07E-06 |
| 72h | 2.67E-07 | 8.33E-07 | 1.45E-06 | 4.94E-07 |
|     | cgd1_730 |          |          |          |
| 2h  | 0.00E+00 | 0.00E+00 | 0.00E+00 | 0.00E+00 |
| 6h  | 2.91E-08 | 8.01E-08 | 7.26E-08 | 5.95E-07 |
| 12h | 2.63E-09 | 1.22E-08 | 2.94E-08 | 8.88E-09 |
| 24h | 8.21E-09 | 5.41E-08 | 4.42E-08 | 1.16E-07 |
| 36h | 7.18E-08 | 1.33E-07 | 2.62E-07 | 1.19E-07 |
| 48h | 7.81E-07 | 1.72E-06 | 1.30E-06 | 1.59E-06 |
| 72h | 2.90E-07 | 1.31E-06 | 8.29E-07 | 1.16E-06 |
|     | cgd2_440 |          |          |          |
| 2h  | 9.62E-06 | 1.95E-06 | 1.84E-05 | 8.90E-06 |
| 6h  | 3.79E-06 | 3.95E-06 | 1.82E-05 | 1.40E-05 |
| 12h | 7.89E-06 | 1.57E-05 | 3.83E-05 | 2.11E-05 |
| 24h | 4.01E-06 | 4.45E-06 | 9.07E-05 | 2.70E-05 |
| 36h | 3.88E-06 | 4.32E-06 | 3.07E-05 | 9.88E-06 |
| 48h | 2.29E-06 | 7.55E-06 | 3.88E-05 | 4.11E-05 |
| 72h | 1.08E-06 | 3.62E-06 | 5.74E-06 | 2.18E-06 |
|     | cgd2_470 |          |          |          |
| 2h  | 5.31E-08 | 1.84E-07 | 6.75E-07 | 6.81E-08 |
| 6h  | 2.77E-06 | 5.46E-06 | 3.53E-05 | 9.87E-06 |
| 12h | 1.34E-05 | 1.57E-05 | 5.40E-05 | 2.24E-05 |
| 24h | 1.71E-06 | 4.38E-06 | 5.70E-05 | 5.53E-05 |
| 36h | 6.26E-06 | 7.70E-06 | 3.69E-05 | 1.36E-05 |
| 48h | 6.00E-06 | 7.81E-06 | 4.81E-05 | 5.36E-05 |
| 72h | 3.57E-05 | 5.19E-05 | 1.77E-04 | 3.65E-05 |
|     | cgd2_500 |          |          |          |
| 2h  | 0.00E+00 | 0.00E+00 | 2.74E-09 | 1.01E-09 |
| 6h  | 1.70E-09 | 5.54E-10 | 1.09E-08 | 1.82E-08 |
| 12h | 0.00E+00 | 4.91E-10 | 3.25E-09 | 2.64E-08 |
| 24h | 2.27E-09 | 1.56E-09 | 4.13E-09 | 2.32E-08 |
| 36h | 9.48E-09 | 7.86E-09 | 5.74E-08 | 2.48E-08 |
| 48h | 1.36E-08 | 1.09E-08 | 3.81E-08 | 5.94E-08 |

|     |          |          |          |          |
|-----|----------|----------|----------|----------|
| 72h | 1.04E-08 | 5.58E-05 | 1.32E-07 | 2.79E-08 |
|     | cgd2_510 |          |          |          |
| 2h  | 0.00E+00 | 0.00E+00 | 3.24E-08 | 0.00E+00 |
| 6h  | 0.00E+00 | 4.39E-09 | 1.72E-08 | 0.00E+00 |
| 12h | 0.00E+00 | 0.00E+00 | 1.63E-09 | 5.77E-09 |
| 24h | 2.06E-09 | 8.78E-10 | 1.80E-08 | 2.57E-08 |
| 36h | 1.52E-08 | 2.65E-08 | 2.70E-08 | 3.75E-08 |
| 48h | 5.10E-08 | 4.17E-08 | 1.56E-07 | 2.00E-07 |
| 72h | 1.68E-07 | 2.75E-07 | 1.16E-06 | 4.65E-07 |
|     | cgd2_520 |          |          |          |
| 2h  | 0.00E+00 | 6.26E-07 | 0.00E+00 | 7.70E-08 |
| 6h  | 5.75E-08 | 2.37E-07 | 2.81E-07 | 6.31E-07 |
| 12h | 1.03E-08 | 0.00E+00 | 4.87E-07 | 1.14E-07 |
| 24h | 1.81E-08 | 1.20E-07 | 3.73E-07 | 2.58E-07 |
| 36h | 7.30E-08 | 7.29E-07 | 1.61E-07 | 2.80E-07 |
| 48h | 9.54E-08 | 2.19E-07 | 2.74E-07 | 1.14E-07 |
| 72h | 2.90E-08 | 1.25E-07 | 6.92E-07 | 2.67E-07 |
|     | cgd2_550 |          |          |          |
| 2h  | 0.00E+00 | 0.00E+00 | 2.77E-09 | 0.00E+00 |
| 6h  | 0.00E+00 | 0.00E+00 | 0.00E+00 | 2.36E-08 |
| 12h | 6.49E-07 | 1.19E-07 | 4.93E-07 | 1.36E-06 |
| 24h | 9.17E-08 | 4.38E-08 | 2.79E-07 | 5.43E-07 |
| 36h | 9.25E-07 | 4.28E-07 | 6.26E-06 | 3.54E-06 |
| 48h | 3.57E-07 | 2.49E-07 | 1.32E-06 | 1.52E-06 |
| 72h | 1.91E-07 | 2.26E-07 | 9.08E-07 | 5.51E-07 |
|     | cgd2_560 |          |          |          |
| 2h  | 2.77E-04 | 1.36E-05 | 0.00E+00 | 0.00E+00 |
| 6h  | 2.39E-04 | 8.37E-05 | 2.16E-03 | 2.78E-03 |
| 12h | 2.46E-04 | 7.74E-05 | 3.73E-04 | 9.02E-04 |
| 24h | 1.05E-04 | 1.05E-04 | 6.27E-04 | 8.35E-04 |
| 36h | 1.57E-04 | 1.19E-04 | 4.40E-04 | 1.08E-03 |
| 48h | 9.26E-05 | 1.49E-04 | 4.67E-04 | 2.03E-03 |
| 72h | 1.95E-04 | 4.79E-05 | 3.59E-04 | 1.73E-04 |
|     | cgd2_570 |          |          |          |
| 2h  | 1.14E-08 | 3.99E-09 | 7.31E-07 | 1.59E-08 |
| 6h  | 8.59E-08 | 1.64E-07 | 1.17E-06 | 1.61E-06 |
| 12h | 7.47E-08 | 1.06E-07 | 4.19E-07 | 1.39E-06 |
| 24h | 8.69E-08 | 1.94E-07 | 6.21E-07 | 1.49E-06 |
| 36h | 4.16E-07 | 4.23E-07 | 1.10E-06 | 4.18E-06 |
| 48h | 4.56E-07 | 3.18E-07 | 1.13E-06 | 4.54E-06 |
| 72h | 2.29E-07 | 4.83E-07 | 2.02E-06 | 9.23E-07 |
|     | cgd2_580 |          |          |          |
| 2h  | 1.52E-09 | 0.00E+00 | 0.00E+00 | 0.00E+00 |
| 6h  | 8.12E-07 | 9.58E-07 | 4.75E-06 | 2.98E-06 |
| 12h | 2.08E-07 | 3.78E-08 | 4.11E-07 | 7.97E-07 |
| 24h | 3.91E-07 | 1.06E-07 | 2.70E-06 | 1.31E-05 |
| 36h | 9.88E-07 | 1.10E-06 | 2.74E-06 | 7.70E-06 |
| 48h | 8.01E-07 | 6.19E-07 | 2.38E-06 | 3.09E-06 |
| 72h | 1.73E-08 | 9.29E-08 | 1.95E-07 | 7.87E-08 |
|     | cgd2_590 |          |          |          |
| 2h  | 2.01E-09 | 0.00E+00 | 0.00E+00 | 0.00E+00 |
| 6h  | 1.07E-07 | 1.09E-06 | 3.60E-07 | 5.62E-07 |
| 12h | 4.77E-06 | 3.64E-07 | 1.23E-05 | 7.24E-06 |

|          |          |          |          |          |
|----------|----------|----------|----------|----------|
| 24h      | 1.43E-06 | 1.27E-06 | 6.68E-06 | 5.92E-06 |
| 36h      | 3.93E-06 | 2.54E-06 | 2.59E-05 | 9.02E-06 |
| 48h      | 1.73E-05 | 1.53E-05 | 2.26E-04 | 7.45E-05 |
| 72h      | 2.06E-05 | 2.36E-05 | 1.08E-04 | 2.04E-04 |
| cgd2_600 |          |          |          |          |
| 2h       | 1.61E-06 | 3.19E-07 | 9.46E-07 | 1.64E-06 |
| 6h       | 3.79E-06 | 2.08E-06 | 3.98E-05 | 1.97E-05 |
| 12h      | 1.77E-07 | 1.35E-07 | 2.10E-06 | 2.14E-05 |
| 24h      | 7.81E-07 | 7.36E-07 | 9.81E-06 | 3.07E-05 |
| 36h      | 1.44E-06 | 2.20E-06 | 2.82E-06 | 4.41E-06 |
| 48h      | 9.03E-07 | 7.31E-07 | 1.20E-06 | 5.81E-06 |
| 72h      | 6.64E-08 | 1.57E-07 | 7.01E-07 | 9.52E-07 |
| cgd2_630 |          |          |          |          |
| 2h       | 0.00E+00 | 0.00E+00 | 0.00E+00 | 0.00E+00 |
| 6h       | 0.00E+00 | 0.00E+00 | 0.00E+00 | 0.00E+00 |
| 12h      | 2.45E-07 | 2.70E-07 | 4.53E-07 | 3.48E-07 |
| 24h      | 4.04E-08 | 2.88E-08 | 4.82E-08 | 1.77E-07 |
| 36h      | 1.43E-07 | 3.51E-07 | 1.77E-07 | 3.13E-07 |
| 48h      | 5.12E-08 | 1.62E-07 | 5.93E-08 | 6.48E-07 |
| 72h      | 1.52E-07 | 1.39E-07 | 5.15E-07 | 1.22E-07 |
| cgd2_660 |          |          |          |          |
| 2h       | 0.00E+00 | 0.00E+00 | 0.00E+00 | 1.47E-07 |
| 6h       | 0.00E+00 | 0.00E+00 | 0.00E+00 | 0.00E+00 |
| 12h      | 1.36E-05 | 2.31E-05 | 9.58E-05 | 9.67E-05 |
| 24h      | 8.37E-05 | 4.71E-06 | 1.97E-05 | 4.95E-06 |
| 36h      | 2.35E-05 | 1.80E-05 | 2.22E-04 | 5.81E-05 |
| 48h      | 9.93E-06 | 2.85E-05 | 6.74E-05 | 2.74E-05 |
| 72h      | 9.11E-06 | 6.51E-06 | 1.95E-05 | 3.19E-06 |
| cgd2_670 |          |          |          |          |
| 2h       | 0.00E+00 | 1.12E-08 | 0.00E+00 | 0.00E+00 |
| 6h       | 3.37E-07 | 3.68E-08 | 1.84E-08 | 0.00E+00 |
| 12h      | 8.98E-07 | 5.70E-07 | 7.15E-06 | 3.25E-06 |
| 24h      | 1.19E-06 | 7.12E-07 | 1.42E-06 | 7.17E-07 |
| 36h      | 2.16E-06 | 1.09E-06 | 1.52E-05 | 2.85E-06 |
| 48h      | 2.07E-06 | 3.00E-06 | 1.24E-05 | 6.08E-06 |
| 72h      | 2.02E-06 | 2.08E-06 | 3.48E-06 | 1.53E-06 |
| cgd2_680 |          |          |          |          |
| 2h       | 2.83E-05 | 7.52E-07 | 3.31E-05 | 4.62E-06 |
| 6h       | 4.95E-05 | 2.06E-05 | 1.11E-04 | 6.92E-05 |
| 12h      | 2.65E-07 | 7.52E-07 | 3.78E-05 | 2.10E-05 |
| 24h      | 3.36E-06 | 5.25E-06 | 5.05E-05 | 3.14E-05 |
| 36h      | 5.96E-06 | 3.40E-06 | 3.96E-05 | 8.28E-06 |
| 48h      | 1.31E-06 | 2.58E-06 | 1.65E-05 | 4.54E-06 |
| 72h      | 3.59E-07 | 7.25E-07 | 2.65E-06 | 8.58E-07 |
| cgd2_690 |          |          |          |          |
| 2h       | 1.04E-05 | 1.64E-05 | 4.09E-05 | 9.86E-06 |
| 6h       | 3.37E-06 | 8.82E-06 | 1.07E-05 | 5.92E-06 |
| 12h      | 3.78E-06 | 1.62E-06 | 3.35E-05 | 5.24E-05 |
| 24h      | 3.61E-06 | 4.80E-06 | 9.17E-06 | 8.81E-06 |
| 36h      | 2.41E-06 | 1.60E-06 | 7.47E-06 | 4.04E-06 |
| 48h      | 1.34E-07 | 2.43E-07 | 7.54E-07 | 5.16E-07 |
| 72h      | 1.84E-07 | 1.82E-07 | 4.58E-07 | 3.18E-07 |
| cgd2_700 |          |          |          |          |

|     |          |          |          |          |
|-----|----------|----------|----------|----------|
| 2h  | 0.00E+00 | 9.35E-09 | 0.00E+00 | 0.00E+00 |
| 6h  | 1.28E-07 | 7.27E-08 | 2.66E-07 | 8.78E-07 |
| 12h | 4.13E-07 | 1.53E-06 | 6.48E-07 | 1.79E-06 |
| 24h | 1.21E-07 | 1.84E-07 | 2.05E-06 | 1.31E-06 |
| 36h | 5.57E-07 | 5.46E-07 | 7.49E-06 | 3.88E-06 |
| 48h | 2.06E-07 | 1.74E-07 | 1.98E-06 | 1.17E-06 |
| 72h | 1.12E-06 | 5.92E-07 | 8.49E-07 | 1.11E-06 |
|     | cgd2_710 |          |          |          |
| 2h  | 0.00E+00 | 1.38E-06 | 0.00E+00 | 0.00E+00 |
| 6h  | 0.00E+00 | 1.21E-07 | 0.00E+00 | 2.90E-06 |
| 12h | 3.50E-06 | 8.12E-06 | 9.31E-06 | 2.82E-05 |
| 24h | 1.85E-06 | 1.76E-06 | 6.03E-06 | 3.00E-06 |
| 36h | 1.01E-05 | 3.89E-06 | 2.69E-05 | 1.74E-05 |
| 48h | 3.55E-05 | 5.40E-05 | 4.30E-05 | 1.44E-05 |
| 72h | 8.88E-06 | 1.13E-05 | 2.78E-05 | 1.60E-05 |
|     | cgd2_780 |          |          |          |
| 2h  | 0.00E+00 | 0.00E+00 | 0.00E+00 | 0.00E+00 |
| 6h  | 0.00E+00 | 0.00E+00 | 0.00E+00 | 0.00E+00 |
| 12h | 1.99E-04 | 2.43E-04 | 1.56E-03 | 1.26E-03 |
| 24h | 2.10E-04 | 1.30E-04 | 1.43E-04 | 1.38E-04 |
| 36h | 4.18E-05 | 5.80E-05 | 1.32E-03 | 3.06E-04 |
| 48h | 5.25E-05 | 6.25E-05 | 2.68E-04 | 1.36E-04 |
| 72h | 4.72E-05 | 4.57E-05 | 5.15E-04 | 5.01E-05 |
|     | cgd2_790 |          |          |          |
| 2h  | 0.00E+00 | 4.54E-09 | 0.00E+00 | 0.00E+00 |
| 6h  | 0.00E+00 | 0.00E+00 | 0.00E+00 | 0.00E+00 |
| 12h | 0.00E+00 | 0.00E+00 | 0.00E+00 | 4.01E-10 |
| 24h | 6.00E-09 | 2.34E-09 | 1.61E-08 | 8.73E-09 |
| 36h | 5.48E-09 | 1.62E-08 | 6.78E-08 | 1.25E-07 |
| 48h | 2.10E-03 | 3.03E-06 | 2.54E-05 | 3.43E-05 |
| 72h | 2.23E-06 | 3.61E-06 | 6.36E-06 | 7.11E-06 |
|     | cgd2_800 |          |          |          |
| 2h  | 0.00E+00 | 6.96E-08 | 0.00E+00 | 0.00E+00 |
| 6h  | 0.00E+00 | 0.00E+00 | 0.00E+00 | 0.00E+00 |
| 12h | 1.21E-07 | 3.57E-07 | 1.20E-06 | 0.00E+00 |
| 24h | 1.09E-07 | 6.96E-08 | 2.26E-07 | 4.41E-07 |
| 36h | 5.47E-07 | 5.55E-07 | 2.16E-06 | 3.54E-06 |
| 48h | 1.52E-07 | 2.01E-07 | 4.07E-07 | 6.88E-07 |
| 72h | 1.00E-07 | 7.43E-08 | 3.42E-07 | 2.26E-07 |
|     | cgd2_850 |          |          |          |
| 2h  | 3.90E-08 | 0.00E+00 | 1.29E-08 | 5.36E-08 |
| 6h  | 0.00E+00 | 2.30E-08 | 0.00E+00 | 0.00E+00 |
| 12h | 1.33E-09 | 1.11E-06 | 8.77E-09 | 3.64E-09 |
| 24h | 1.89E-08 | 6.07E-09 | 2.26E-09 | 2.95E-08 |
| 36h | 2.10E-08 | 2.04E-08 | 3.39E-08 | 2.67E-07 |
| 48h | 2.01E-06 | 1.57E-06 | 9.56E-07 | 2.65E-06 |
| 72h | 4.95E-07 | 3.84E-07 | 8.44E-07 | 5.32E-07 |
|     | cgd2_860 |          |          |          |
| 2h  | 1.66E-08 | 0.00E+00 | 0.00E+00 | 0.00E+00 |
| 6h  | 7.33E-06 | 2.66E-06 | 5.63E-05 | 2.92E-05 |
| 12h | 2.49E-07 | 1.18E-06 | 1.35E-06 | 2.78E-06 |
| 24h | 6.39E-07 | 3.46E-07 | 1.54E-05 | 2.36E-05 |
| 36h | 7.14E-06 | 4.05E-06 | 1.62E-05 | 9.38E-06 |



|     |          |          |          |          |
|-----|----------|----------|----------|----------|
| 48h | 8.94E-06 | 3.22E-06 | 4.23E-06 | 6.08E-06 |
| 72h | 1.65E-07 | 1.87E-07 | 9.39E-07 | 1.37E-06 |
|     | cgd2_870 |          |          |          |
| 2h  | 1.24E-08 | 9.17E-08 | 1.15E-06 | 4.85E-07 |
| 6h  | 0.00E+00 | 1.54E-07 | 3.46E-06 | 1.47E-06 |
| 12h | 8.34E-05 | 2.76E-06 | 3.73E-06 | 1.79E-06 |
| 24h | 3.51E-07 | 6.92E-07 | 1.60E-06 | 3.20E-06 |
| 36h | 2.04E-06 | 4.85E-07 | 2.38E-06 | 1.90E-06 |
| 48h | 5.47E-06 | 1.09E-07 | 6.75E-07 | 6.86E-07 |
| 72h | 9.05E-07 | 7.57E-08 | 2.46E-06 | 1.34E-07 |
|     | cgd1_60  |          |          |          |
| 2h  | 2.49E-08 | 0.00E+00 | 0.00E+00 | 0.00E+00 |
| 6h  | 0.00E+00 | 0.00E+00 | 2.38E-08 | 4.68E-10 |
| 12h | 0.00E+00 | 1.98E-08 | 3.87E-09 | 4.54E-09 |
| 24h | 8.87E-10 | 1.06E-10 | 3.79E-09 | 1.03E-08 |
| 36h | 7.64E-07 | 1.52E-09 | 1.84E-08 | 3.76E-08 |
| 48h | 2.56E-08 | 8.49E-08 | 4.45E-07 | 5.32E-06 |
| 72h | 3.17E-08 | 8.75E-08 | 5.25E-08 | 5.24E-08 |
|     | cgd1_70  |          |          |          |
| 2h  | 0.00E+00 | 0.00E+00 | 0.00E+00 | 0.00E+00 |
| 6h  | 0.00E+00 | 0.00E+00 | 1.16E-07 | 1.23E-08 |
| 12h | 6.56E-09 | 0.00E+00 | 0.00E+00 | 4.42E-08 |
| 24h | 0.00E+00 | 1.73E-09 | 5.82E-09 | 1.17E-07 |
| 36h | 8.01E-09 | 1.38E-10 | 1.63E-08 | 4.60E-08 |
| 48h | 1.76E-09 | 2.20E-10 | 1.84E-08 | 1.92E-08 |
| 72h | 2.65E-09 | 8.24E-09 | 1.40E-09 | 0.00E+00 |
|     | cgd1_80  |          |          |          |
| 2h  | 8.44E-08 | 0.00E+00 | 4.68E-05 | 6.08E-06 |
| 6h  | 6.52E-05 | 1.23E-04 | 8.42E-05 | 8.71E-06 |
| 12h | 1.77E-04 | 2.77E-05 | 3.09E-04 | 1.55E-04 |
| 24h | 1.02E-04 | 1.95E-05 | 2.30E-04 | 1.83E-04 |
| 36h | 2.39E-05 | 4.91E-06 | 1.20E-04 | 1.20E-04 |
| 48h | 1.53E-05 | 5.18E-06 | 1.20E-04 | 8.43E-05 |
| 72h | 1.59E-06 | 1.14E-06 | 1.51E-06 | 4.39E-06 |
|     | cgd1_90  |          |          |          |
| 2h  | 2.33E-07 | 6.26E-08 | 5.77E-07 | 1.92E-08 |
| 6h  | 1.15E-07 | 1.57E-07 | 7.66E-07 | 2.42E-07 |
| 12h | 2.56E-08 | 3.19E-08 | 1.61E-07 | 2.07E-07 |
| 24h | 1.59E-08 | 1.70E-08 | 4.16E-07 | 1.30E-06 |
| 36h | 1.97E-07 | 5.27E-08 | 1.31E-06 | 3.36E-07 |
| 48h | 1.92E-08 | 2.04E-08 | 2.06E-07 | 3.12E-07 |
| 72h | 3.44E-08 | 6.72E-08 | 5.84E-08 | 1.79E-07 |
|     | cgd1_100 |          |          |          |
| 2h  | 5.00E-05 | 0.00E+00 | 0.00E+00 | 0.00E+00 |
| 6h  | 1.02E-04 | 3.79E-06 | 9.18E-05 | 2.81E-05 |
| 12h | 1.85E-05 | 0.00E+00 | 6.44E-05 | 8.68E-05 |
| 24h | 6.65E-05 | 1.12E-05 | 3.69E-04 | 9.07E-04 |
| 36h | 1.23E-04 | 1.85E-05 | 8.71E-04 | 5.75E-04 |
| 48h | 3.53E-05 | 1.22E-05 | 5.07E-04 | 3.04E-04 |
| 72h | 2.27E-05 | 8.07E-06 | 7.84E-05 | 5.03E-07 |
|     | cgd1_110 |          |          |          |
| 2h  | 2.68E-06 | 6.02E-07 | 1.42E-06 | 3.33E-06 |
| 6h  | 1.33E-07 | 0.00E+00 | 4.00E-06 | 5.03E-08 |

|     |          |          |          |          |
|-----|----------|----------|----------|----------|
| 12h | 9.04E-05 | 1.72E-05 | 2.08E-04 | 1.95E-04 |
| 24h | 8.06E-06 | 1.09E-06 | 3.71E-06 | 4.52E-06 |
| 36h | 2.04E-06 | 5.11E-07 | 1.07E-05 | 1.30E-05 |
| 48h | 4.64E-07 | 3.42E-07 | 7.22E-06 | 1.87E-06 |
| 72h | 4.54E-07 | 2.04E-07 | 7.08E-07 | 9.92E-08 |
|     | cgd1_120 |          |          |          |
| 2h  | 0.00E+00 | 0.00E+00 | 0.00E+00 | 1.16E-08 |
| 6h  | 0.00E+00 | 0.00E+00 | 0.00E+00 | 0.00E+00 |
| 12h | 4.94E-07 | 5.99E-07 | 1.28E-06 | 1.10E-06 |
| 24h | 4.28E-08 | 4.59E-08 | 6.77E-08 | 2.41E-08 |
| 36h | 7.71E-09 | 2.29E-08 | 2.97E-07 | 1.82E-03 |
| 48h | 3.96E-09 | 1.25E-08 | 3.87E-08 | 3.45E-08 |
| 72h | 6.03E-09 | 4.54E-09 | 8.06E-09 | 4.87E-08 |
|     | cgd1_130 |          |          |          |
| 2h  | 1.41E-04 | 5.60E-04 | 1.82E-07 | 0.00E+00 |
| 6h  | 5.46E-06 | 8.21E-06 | 2.90E-04 | 1.08E-05 |
| 12h | 1.43E-03 | 8.13E-03 | 1.48E-03 | 9.41E-03 |
| 24h | 2.17E-04 | 1.98E-04 | 2.45E-04 | 2.09E-04 |
| 36h | 1.45E-04 | 2.01E-04 | 4.71E-04 | 1.32E-03 |
| 48h | 1.05E-05 | 6.94E-05 | 4.05E-04 | 3.31E-04 |
| 72h | 6.83E-05 | 1.62E-04 | 3.21E-04 | 3.02E-04 |
|     | cgd1_140 |          |          |          |
| 2h  | 0.00E+00 | 2.42E-06 | 4.35E-08 | 1.07E-07 |
| 6h  | 0.00E+00 | 1.44E-08 | 0.00E+00 | 0.00E+00 |
| 12h | 2.01E-06 | 1.32E-06 | 5.43E-06 | 9.81E-06 |
| 24h | 7.91E-08 | 1.53E-07 | 4.34E-07 | 2.16E-07 |
| 36h | 5.06E-08 | 4.08E-08 | 6.25E-07 | 2.11E-06 |
| 48h | 1.80E-08 | 3.08E-08 | 2.55E-08 | 3.48E-07 |
| 72h | 4.37E-09 | 5.81E-09 | 7.73E-08 | 1.31E-07 |
|     | cgd1_150 |          |          |          |
| 2h  | 8.05E-06 | 9.28E-07 | 3.68E-06 | 2.99E-06 |
| 6h  | 0.00E+00 | 0.00E+00 | 0.00E+00 | 0.00E+00 |
| 12h | 8.09E-07 | 2.92E-07 | 1.11E-06 | 5.14E-06 |
| 24h | 8.43E-07 | 3.26E-07 | 5.08E-07 | 1.30E-06 |
| 36h | 4.28E-07 | 4.47E-08 | 2.85E-07 | 7.89E-07 |
| 48h | 9.86E-08 | 5.48E-08 | 1.70E-07 | 5.44E-07 |
| 72h | 2.86E-08 | 1.84E-08 | 1.93E-08 | 2.07E-07 |
|     | cgd1_180 |          |          |          |
| 2h  | 0.00E+00 | 0.00E+00 | 0.00E+00 | 0.00E+00 |
| 6h  | 0.00E+00 | 2.16E-07 | 8.71E-04 | 0.00E+00 |
| 12h | 1.72E-06 | 8.73E-07 | 1.82E-06 | 9.31E-06 |
| 24h | 3.14E-07 | 7.53E-08 | 3.41E-07 | 1.85E-06 |
| 36h | 8.52E-08 | 1.37E-07 | 9.98E-07 | 3.84E-06 |
| 48h | 5.39E-08 | 9.95E-08 | 2.18E-07 | 2.21E-06 |
| 72h | 5.18E-09 | 1.43E-08 | 2.56E-07 | 1.80E-07 |
|     | cgd1_190 |          |          |          |
| 2h  | 0.00E+00 | 2.62E-06 | 0.00E+00 | 0.00E+00 |
| 6h  | 4.86E-06 | 3.29E-06 | 5.92E-06 | 3.34E-07 |
| 12h | 1.13E-03 | 2.79E-04 | 2.70E-04 | 2.22E-04 |
| 24h | 3.39E-04 | 1.78E-05 | 3.29E-05 | 9.03E-05 |
| 36h | 1.10E-04 | 2.50E-05 | 4.74E-04 | 8.29E-04 |
| 48h | 1.92E-05 | 5.29E-06 | 1.01E-04 | 8.34E-05 |
| 72h | 1.17E-04 | 3.00E-05 | 3.56E-04 | 4.06E-05 |

|     |          |          |          |          |
|-----|----------|----------|----------|----------|
|     | cgd1_740 |          |          |          |
| 2h  | 2.75E-08 | 0.00E+00 | 0.00E+00 | 0.00E+00 |
| 6h  | 2.57E-08 | 0.00E+00 | 0.00E+00 | 9.97E-06 |
| 12h | 4.35E-08 | 8.94E-07 | 3.02E-06 | 2.91E-06 |
| 24h | 1.19E-07 | 3.19E-06 | 4.15E-07 | 5.88E-05 |
| 36h | 6.47E-07 | 4.80E-06 | 4.57E-06 | 3.92E-05 |
| 48h | 2.94E-06 | 4.43E-05 | 1.03E-05 | 1.27E-04 |
| 72h | 1.89E-06 | 2.12E-05 | 1.00E-05 | 6.12E-05 |
|     | cgd1_750 |          |          |          |
| 2h  | 0.00E+00 | 0.00E+00 | 0.00E+00 | 0.00E+00 |
| 6h  | 4.74E-09 | 0.00E+00 | 0.00E+00 | 0.00E+00 |
| 12h | 2.25E-08 | 5.95E-07 | 2.22E-07 | 4.48E-07 |
| 24h | 1.63E-07 | 1.65E-06 | 1.33E-06 | 1.39E-06 |
| 36h | 2.68E-07 | 3.08E-06 | 2.78E-06 | 3.23E-06 |
| 48h | 3.78E-07 | 3.55E-06 | 1.41E-06 | 2.64E-06 |
| 72h | 1.73E-07 | 3.20E-07 | 9.79E-07 | 3.78E-07 |
|     | cgd1_760 |          |          |          |
| 2h  | 4.29E-07 | 2.89E-07 | 3.38E-06 | 1.57E-07 |
| 6h  | 7.25E-08 | 3.28E-06 | 2.88E-06 | 6.06E-05 |
| 12h | 6.07E-06 | 1.38E-05 | 6.18E-05 | 1.46E-04 |
| 24h | 3.03E-06 | 3.28E-05 | 2.33E-05 | 1.72E-04 |
| 36h | 2.05E-06 | 4.56E-05 | 1.52E-05 | 3.22E-04 |
| 48h | 2.74E-06 | 4.18E-05 | 1.90E-05 | 4.49E-04 |
| 72h | 5.71E-06 | 3.13E-05 | 2.29E-05 | 2.64E-04 |
|     | cgd1_770 |          |          |          |
| 2h  | 0.00E+00 | 1.83E-08 | 0.00E+00 | 0.00E+00 |
| 6h  | 3.03E-07 | 8.34E-07 | 5.14E-07 | 1.22E-05 |
| 12h | 3.50E-07 | 4.45E-07 | 4.07E-07 | 6.72E-07 |
| 24h | 1.29E-07 | 3.02E-06 | 6.09E-07 | 3.01E-05 |
| 36h | 6.26E-07 | 5.26E-06 | 2.79E-06 | 3.11E-05 |
| 48h | 2.27E-07 | 3.24E-06 | 3.34E-06 | 4.00E-05 |
| 72h | 4.10E-07 | 1.68E-06 | 4.04E-06 | 1.37E-05 |
|     | cgd1_790 |          |          |          |
| 2h  | 0.00E+00 | 0.00E+00 | 0.00E+00 | 0.00E+00 |
| 6h  | 0.00E+00 | 0.00E+00 | 0.00E+00 | 0.00E+00 |
| 12h | 6.64E-08 | 2.88E-06 | 1.69E-06 | 2.94E-07 |
| 24h | 6.39E-08 | 2.45E-07 | 7.51E-07 | 1.42E-06 |
| 36h | 6.13E-08 | 2.48E-06 | 6.29E-07 | 4.93E-06 |
| 48h | 1.05E-08 | 2.36E-07 | 2.60E-07 | 3.61E-07 |
| 72h | 4.25E-07 | 2.42E-06 | 3.43E-06 | 3.00E-06 |
|     | cgd1_800 |          |          |          |
| 2h  | 1.47E-08 | 0.00E+00 | 0.00E+00 | 3.88E-07 |
| 6h  | 1.32E-07 | 0.00E+00 | 1.27E-07 | 1.77E-07 |
| 12h | 9.82E-08 | 4.71E-07 | 1.24E-06 | 3.75E-06 |
| 24h | 2.03E-07 | 1.21E-06 | 8.94E-07 | 4.08E-05 |
| 36h | 6.38E-07 | 1.33E-05 | 3.33E-06 | 1.40E-04 |
| 48h | 1.15E-06 | 1.46E-05 | 4.00E-06 | 1.32E-04 |
| 72h | 2.66E-06 | 1.07E-05 | 6.82E-06 | 2.11E-04 |
|     | cgd1_810 |          |          |          |
| 2h  | 0.00E+00 | 0.00E+00 | 4.50E-09 | 0.00E+00 |
| 6h  | 0.00E+00 | 0.00E+00 | 0.00E+00 | 0.00E+00 |
| 12h | 2.09E-08 | 1.67E-08 | 4.57E-09 | 1.13E-07 |
| 24h | 9.34E-09 | 3.65E-08 | 8.14E-08 | 1.33E-07 |

|     |          |          |          |          |
|-----|----------|----------|----------|----------|
| 36h | 1.36E-08 | 5.95E-07 | 1.64E-07 | 1.91E-07 |
| 48h | 6.21E-08 | 4.68E-07 | 2.36E-07 | 1.11E-06 |
| 72h | 2.14E-07 | 2.80E-06 | 5.49E-07 | 2.69E-06 |
|     | cgd1_820 |          |          |          |
| 2h  | 4.53E-08 | 5.56E-08 | 2.46E-07 | 0.00E+00 |
| 6h  | 0.00E+00 | 8.14E-08 | 0.00E+00 | 0.00E+00 |
| 12h | 2.42E-07 | 2.03E-06 | 1.90E-06 | 3.91E-06 |
| 24h | 1.20E-07 | 1.47E-06 | 6.91E-07 | 3.52E-06 |
| 36h | 1.09E-06 | 1.50E-05 | 3.77E-06 | 2.10E-05 |
| 48h | 9.29E-07 | 6.65E-06 | 4.44E-06 | 1.90E-05 |
| 72h | 2.16E-06 | 1.49E-05 | 2.40E-06 | 1.34E-05 |
|     | cgd1_830 |          |          |          |
| 2h  | 3.87E-07 | 6.94E-06 | 6.21E-06 | 7.50E-06 |
| 6h  | 6.68E-07 | 1.49E-05 | 9.30E-06 | 4.90E-06 |
| 12h | 1.72E-06 | 1.32E-05 | 5.45E-06 | 2.23E-05 |
| 24h | 7.63E-07 | 1.05E-05 | 9.90E-06 | 5.03E-05 |
| 36h | 9.80E-07 | 2.71E-05 | 5.29E-06 | 1.00E-04 |
| 48h | 1.42E-06 | 1.46E-05 | 8.07E-06 | 4.50E-05 |
| 72h | 7.28E-07 | 4.52E-05 | 4.28E-06 | 3.12E-05 |
|     | cgd1_860 |          |          |          |
| 2h  | 9.84E-08 | 2.02E-07 | 1.07E-06 | 1.41E-06 |
| 6h  | 3.00E-08 | 6.26E-07 | 2.30E-07 | 1.35E-08 |
| 12h | 4.90E-09 | 1.33E-07 | 1.16E-07 | 6.30E-07 |
| 24h | 3.66E-08 | 3.91E-07 | 2.58E-07 | 2.30E-07 |
| 36h | 1.26E-07 | 7.62E-07 | 2.31E-07 | 2.37E-06 |
| 48h | 3.13E-07 | 9.51E-07 | 6.45E-07 | 9.02E-05 |
| 72h | 8.48E-08 | 6.87E-07 | 6.23E-08 | 5.72E-07 |
|     | cgd1_890 |          |          |          |
| 2h  | 1.62E-05 | 3.14E-05 | 4.05E-05 | 3.03E-04 |
| 6h  | 3.39E-06 | 1.67E-05 | 3.08E-05 | 1.41E-05 |
| 12h | 1.99E-06 | 1.72E-05 | 1.07E-05 | 7.40E-05 |
| 24h | 5.04E-06 | 3.36E-05 | 3.67E-05 | 8.64E-05 |
| 36h | 3.57E-06 | 5.48E-05 | 1.30E-05 | 1.43E-04 |
| 48h | 6.61E-06 | 4.20E-05 | 1.72E-05 | 5.02E-04 |
| 72h | 1.25E-06 | 1.85E-05 | 3.84E-06 | 4.61E-05 |
|     | cgd1_940 |          |          |          |
| 2h  | 0.00E+00 | 0.00E+00 | 0.00E+00 | 0.00E+00 |
| 6h  | 0.00E+00 | 0.00E+00 | 0.00E+00 | 0.00E+00 |
| 12h | 3.04E-07 | 8.52E-07 | 3.28E-06 | 1.05E-05 |
| 24h | 4.83E-07 | 5.25E-06 | 3.56E-06 | 1.53E-05 |
| 36h | 1.34E-06 | 1.87E-05 | 1.37E-05 | 2.71E-04 |
| 48h | 2.29E-06 | 6.13E-06 | 3.55E-06 | 4.68E-05 |
| 72h | 2.00E-06 | 2.34E-06 | 3.72E-06 | 5.67E-05 |
|     | cgd2_880 |          |          |          |
| 2h  | 0.00E+00 | 0.00E+00 | 9.34E-07 | 0.00E+00 |
| 6h  | 2.02E-05 | 2.06E-05 | 1.64E-04 | 1.35E-04 |
| 12h | 1.34E-06 | 2.65E-07 | 8.96E-06 | 5.57E-06 |
| 24h | 5.12E-06 | 3.84E-06 | 8.06E-05 | 5.71E-05 |
| 36h | 9.56E-06 | 2.79E-06 | 2.90E-05 | 9.21E-06 |
| 48h | 8.96E-06 | 2.62E-06 | 1.12E-05 | 1.41E-05 |
| 72h | 8.54E-07 | 1.76E-06 | 4.90E-06 | 6.77E-07 |
|     | cgd2_890 |          |          |          |
| 2h  | 1.01E-08 | 0.00E+00 | 3.72E-08 | 0.00E+00 |

|     |          |          |          |          |
|-----|----------|----------|----------|----------|
| 6h  | 2.32E-06 | 5.61E-07 | 2.44E-06 | 3.08E-06 |
| 12h | 5.67E-08 | 2.38E-09 | 1.22E-07 | 9.51E-08 |
| 24h | 3.47E-07 | 7.93E-08 | 2.54E-06 | 2.98E-06 |
| 36h | 6.69E-07 | 3.12E-07 | 7.76E-07 | 2.94E-07 |
| 48h | 8.29E-07 | 1.43E-07 | 7.00E-07 | 1.17E-06 |
| 72h | 6.61E-07 | 1.98E-07 | 6.81E-07 | 1.83E-07 |
|     | cgd2_920 |          |          |          |
| 2h  | 0.00E+00 | 0.00E+00 | 0.00E+00 | 0.00E+00 |
| 6h  | 0.00E+00 | 0.00E+00 | 0.00E+00 | 0.00E+00 |
| 12h | 1.05E-06 | 3.59E-07 | 5.45E-06 | 1.85E-05 |
| 24h | 5.09E-07 | 4.60E-07 | 1.51E-06 | 2.63E-06 |
| 36h | 1.60E-06 | 9.55E-07 | 1.44E-05 | 1.09E-05 |
| 48h | 9.75E-07 | 1.67E-07 | 2.59E-06 | 4.07E-06 |
| 72h | 2.10E-06 | 3.43E-07 | 4.33E-06 | 2.17E-06 |
|     | cgd2_930 |          |          |          |
| 2h  | 2.11E-09 | 0.00E+00 | 1.24E-08 | 0.00E+00 |
| 6h  | 3.58E-07 | 1.23E-07 | 1.25E-06 | 2.42E-06 |
| 12h | 4.61E-08 | 6.81E-09 | 3.66E-07 | 1.62E-07 |
| 24h | 8.17E-08 | 4.45E-08 | 3.65E-07 | 1.14E-06 |
| 36h | 2.94E-07 | 3.31E-07 | 1.48E-06 | 1.09E-06 |
| 48h | 1.96E-07 | 9.43E-08 | 2.08E-07 | 5.62E-07 |
| 72h | 1.33E-07 | 7.46E-08 | 4.12E-07 | 4.90E-07 |
|     | cgd2_940 |          |          |          |
| 2h  | 2.62E-03 | 1.17E-04 | 1.07E-02 | 3.60E-03 |
| 6h  | 4.08E-04 | 1.20E-04 | 1.73E-03 | 5.81E-04 |
| 12h | 6.45E-04 | 1.61E-04 | 6.86E-03 | 5.45E-03 |
| 24h | 8.57E-04 | 2.39E-04 | 1.80E-03 | 1.61E-03 |
| 36h | 1.05E-03 | 3.04E-04 | 2.75E-03 | 1.18E-03 |
| 48h | 5.48E-04 | 6.34E-05 | 4.99E-04 | 3.82E-04 |
| 72h | 5.38E-04 | 6.80E-05 | 3.91E-04 | 2.56E-04 |
|     | cgd2_950 |          |          |          |
| 2h  | 5.25E-06 | 2.71E-07 | 6.33E-05 | 3.92E-06 |
| 6h  | 3.07E-06 | 2.15E-06 | 3.94E-05 | 9.22E-06 |
| 12h | 3.54E-07 | 6.67E-09 | 4.27E-06 | 4.52E-06 |
| 24h | 5.39E-07 | 1.48E-07 | 3.87E-06 | 4.38E-06 |
| 36h | 7.24E-07 | 8.95E-07 | 3.32E-06 | 2.39E-06 |
| 48h | 4.20E-07 | 4.32E-07 | 2.17E-06 | 1.42E-06 |
| 72h | 6.18E-07 | 2.72E-07 | 5.09E-07 | 8.11E-07 |
|     | cgd2_960 |          |          |          |
| 2h  | 2.24E-06 | 9.10E-08 | 4.85E-06 | 1.17E-06 |
| 6h  | 1.88E-07 | 1.02E-06 | 2.88E-06 | 4.48E-06 |
| 12h | 3.46E-07 | 1.58E-07 | 2.56E-06 | 2.34E-06 |
| 24h | 3.20E-07 | 2.02E-07 | 2.08E-06 | 3.06E-06 |
| 36h | 1.04E-06 | 1.04E-06 | 4.62E-06 | 2.67E-06 |
| 48h | 8.15E-07 | 3.11E-07 | 1.45E-06 | 1.24E-05 |
| 72h | 7.26E-07 | 2.16E-07 | 1.34E-06 | 5.52E-07 |
|     | cgd2_970 |          |          |          |
| 2h  | 1.53E-08 | 5.68E-10 | 2.71E-08 | 1.13E-08 |
| 6h  | 7.70E-09 | 2.09E-08 | 6.54E-08 | 3.92E-08 |
| 12h | 1.87E-09 | 0.00E+00 | 2.46E-08 | 3.18E-09 |
| 24h | 1.46E-08 | 1.23E-08 | 1.17E-07 | 1.18E-07 |
| 36h | 9.86E-08 | 1.12E-07 | 1.73E-07 | 3.24E-07 |
| 48h | 5.33E-08 | 9.25E-08 | 3.87E-07 | 3.21E-07 |

|     |           |          |          |          |
|-----|-----------|----------|----------|----------|
| 72h | 8.13E-08  | 1.99E-08 | 3.71E-08 | 1.13E-07 |
|     | cgd2_1020 |          |          |          |
| 2h  | 2.55E-08  | 3.61E-09 | 1.29E-08 | 7.14E-08 |
| 6h  | 4.75E-07  | 2.75E-07 | 7.18E-07 | 1.23E-06 |
| 12h | 7.06E-08  | 7.17E-11 | 5.09E-08 | 5.52E-08 |
| 24h | 1.90E-08  | 8.88E-08 | 1.11E-06 | 9.06E-07 |
| 36h | 1.04E-06  | 6.28E-07 | 6.56E-07 | 9.63E-07 |
| 48h | 5.50E-07  | 5.82E-07 | 6.73E-07 | 1.18E-06 |
| 72h | 1.10E-07  | 5.29E-08 | 2.03E-07 | 2.55E-07 |
|     | cgd1_10   |          |          |          |
| 2h  | 4.28E-06  | 4.50E-07 | 2.85E-06 | 3.29E-05 |
| 6h  | 3.81E-06  | 2.95E-05 | 2.89E-05 | 2.88E-05 |
| 12h | 1.53E-06  | 1.92E-07 | 1.29E-05 | 2.89E-06 |
| 24h | 7.61E-06  | 1.09E-05 | 4.03E-05 | 3.55E-05 |
| 36h | 1.68E-05  | 2.13E-05 | 8.89E-06 | 2.77E-05 |
| 48h | 2.17E-05  | 9.07E-06 | 9.29E-06 | 4.96E-05 |
| 72h | 2.88E-06  | 1.88E-06 | 2.78E-06 | 7.45E-06 |
|     | cgd1_20   |          |          |          |
| 2h  | 1.08E-07  | 5.56E-08 | 8.21E-07 | 1.20E-06 |
| 6h  | 3.11E-07  | 4.39E-07 | 7.15E-07 | 4.28E-07 |
| 12h | 1.68E-07  | 7.32E-09 | 6.63E-07 | 1.29E-06 |
| 24h | 1.09E-07  | 1.63E-07 | 2.97E-07 | 6.78E-07 |
| 36h | 4.04E-07  | 1.67E-07 | 4.40E-07 | 8.91E-07 |
| 48h | 3.51E-07  | 2.39E-07 | 2.51E-07 | 7.25E-07 |
| 72h | 2.58E-07  | 2.59E-08 | 7.79E-08 | 3.21E-08 |
|     | cgd1_30   |          |          |          |
| 2h  | 2.04E-06  | 0.00E+00 | 0.00E+00 | 0.00E+00 |
| 6h  | 0.00E+00  | 0.00E+00 | 2.07E-06 | 2.84E-07 |
| 12h | 2.18E-05  | 3.11E-05 | 5.71E-04 | 4.16E-05 |
| 24h | 8.11E-06  | 2.15E-05 | 2.57E-05 | 5.47E-05 |
| 36h | 7.82E-05  | 1.21E-04 | 4.76E-04 | 2.86E-04 |
| 48h | 5.07E-05  | 1.28E-04 | 1.17E-04 | 1.96E-04 |
| 72h | 8.34E-05  | 1.47E-04 | 2.25E-04 | 3.04E-05 |
|     | cgd5_170  |          |          |          |
| 2h  | 7.67E-06  | 1.93E-05 | 3.16E-05 | 1.75E-06 |
| 6h  | 3.13E-05  | 9.46E-05 | 2.96E-05 | 4.66E-05 |
| 12h | 6.96E-05  | 4.81E-04 | 9.01E-05 | 2.28E-04 |
| 24h | 6.68E-05  | 1.45E-04 | 1.08E-04 | 6.76E-05 |
| 36h | 3.64E-05  | 3.24E-04 | 7.03E-05 | 7.51E-05 |
| 48h | 4.50E-05  | 7.54E-05 | 1.30E-04 | 3.73E-05 |
| 72h | 5.49E-06  | 7.73E-06 | 9.07E-06 | 5.69E-06 |
|     | cgd5_210  |          |          |          |
| 2h  | 6.72E-08  | 9.19E-08 | 1.71E-07 | 1.64E-08 |
| 6h  | 6.77E-07  | 2.44E-06 | 4.24E-06 | 2.13E-06 |
| 12h | 6.42E-09  | 1.57E-07 | 5.99E-08 | 1.33E-07 |
| 24h | 5.57E-08  | 8.26E-07 | 9.98E-07 | 6.81E-07 |
| 36h | 1.15E-07  | 6.95E-07 | 2.56E-07 | 3.43E-07 |
| 48h | 4.66E-08  | 4.82E-07 | 6.58E-07 | 1.14E-07 |
| 72h | 5.01E-08  | 7.20E-08 | 6.63E-08 | 2.00E-08 |
|     | cgd5_220  |          |          |          |
| 2h  | 6.34E-05  | 7.50E-04 | 2.20E-03 | 3.01E-04 |
| 6h  | 9.96E-04  | 8.23E-03 | 3.04E-03 | 2.62E-02 |
| 12h | 9.03E-06  | 9.06E-04 | 2.63E-04 | 5.69E-03 |

|     |          |          |          |          |
|-----|----------|----------|----------|----------|
| 24h | 7.79E-04 | 1.06E-03 | 2.38E-03 | 7.38E-04 |
| 36h | 8.25E-04 | 3.38E-03 | 5.35E-03 | 2.06E-03 |
| 48h | 7.01E-05 | 4.74E-04 | 3.61E-03 | 1.71E-03 |
| 72h | 2.45E-04 | 4.36E-04 | 1.27E-03 | 1.89E-04 |
|     | cgd5_230 |          |          |          |
| 2h  | 0.00E+00 | 0.00E+00 | 1.15E-08 | 0.00E+00 |
| 6h  | 0.00E+00 | 0.00E+00 | 0.00E+00 | 3.94E-08 |
| 12h | 3.08E-08 | 3.25E-09 | 3.95E-09 | 4.33E-08 |
| 24h | 6.40E-09 | 3.32E-09 | 1.85E-09 | 4.57E-09 |
| 36h | 1.01E-08 | 1.60E-08 | 2.26E-08 | 2.95E-08 |
| 48h | 7.26E-09 | 1.24E-08 | 1.71E-08 | 1.25E-08 |
| 72h | 5.16E-09 | 1.55E-08 | 7.69E-09 | 5.55E-09 |
|     | cgd5_240 |          |          |          |
| 2h  | 6.79E-07 | 6.93E-06 | 1.29E-06 | 7.81E-06 |
| 6h  | 1.14E-07 | 5.60E-07 | 2.33E-07 | 2.87E-07 |
| 12h | 8.72E-08 | 3.85E-06 | 6.28E-07 | 2.46E-06 |
| 24h | 3.84E-07 | 1.15E-06 | 1.34E-06 | 9.55E-07 |
| 36h | 7.80E-07 | 3.17E-06 | 1.72E-06 | 1.27E-06 |
| 48h | 5.23E-07 | 2.34E-06 | 2.36E-06 | 1.25E-06 |
| 72h | 6.50E-07 | 2.84E-07 | 7.13E-07 | 3.39E-07 |
|     | cgd5_300 |          |          |          |
| 2h  | 1.96E-07 | 4.04E-07 | 7.76E-09 | 0.00E+00 |
| 6h  | 1.19E-09 | 1.06E-07 | 7.96E-07 | 4.68E-08 |
| 12h | 2.31E-07 | 5.68E-06 | 5.10E-06 | 7.23E-06 |
| 24h | 2.27E-07 | 3.48E-07 | 5.47E-07 | 6.25E-07 |
| 36h | 6.17E-07 | 3.34E-06 | 9.07E-07 | 1.73E-06 |
| 48h | 1.09E-06 | 8.21E-07 | 7.23E-07 | 4.44E-07 |
| 72h | 6.05E-07 | 5.52E-08 | 8.33E-07 | 2.74E-07 |
|     | cgd5_310 |          |          |          |
| 2h  | 6.01E-07 | 1.27E-06 | 1.98E-07 | 6.74E-07 |
| 6h  | 4.16E-08 | 7.78E-07 | 1.89E-07 | 1.41E-07 |
| 12h | 3.77E-07 | 3.08E-06 | 7.77E-07 | 4.81E-06 |
| 24h | 9.87E-08 | 3.73E-07 | 2.88E-07 | 2.38E-07 |
| 36h | 1.08E-07 | 1.20E-06 | 2.23E-07 | 4.40E-07 |
| 48h | 1.85E-07 | 4.80E-07 | 1.98E-07 | 3.00E-07 |
| 72h | 2.72E-08 | 1.09E-08 | 8.14E-08 | 3.27E-08 |
|     | cgd5_320 |          |          |          |
| 2h  | 5.47E-07 | 7.33E-07 | 4.44E-07 | 3.65E-07 |
| 6h  | 4.25E-08 | 3.97E-07 | 1.43E-07 | 4.01E-07 |
| 12h | 2.78E-07 | 3.85E-06 | 1.22E-06 | 4.43E-06 |
| 24h | 8.85E-08 | 1.98E-07 | 5.18E-07 | 3.26E-07 |
| 36h | 1.33E-07 | 8.33E-07 | 3.60E-07 | 3.17E-07 |
| 48h | 9.67E-08 | 6.90E-07 | 4.03E-07 | 4.45E-07 |
| 72h | 3.40E-08 | 3.11E-08 | 3.92E-07 | 2.79E-08 |
|     | cgd2_30  |          |          |          |
| 2h  | 7.51E-07 | 5.86E-09 | 6.88E-07 | 1.65E-07 |
| 6h  | 3.94E-06 | 2.83E-05 | 3.40E-06 | 3.21E-05 |
| 12h | 4.70E-07 | 1.15E-06 | 2.18E-06 | 2.59E-06 |
| 24h | 2.44E-06 | 1.85E-05 | 9.75E-07 | 3.69E-05 |
| 36h | 1.26E-05 | 5.71E-05 | 2.51E-05 | 1.66E-05 |
| 48h | 1.67E-05 | 4.83E-05 | 3.91E-05 | 2.11E-05 |
| 72h | 4.88E-06 | 1.51E-05 | 2.56E-05 | 1.17E-05 |
|     | cgd2_60  |          |          |          |

|     |           |          |          |          |
|-----|-----------|----------|----------|----------|
| 2h  | 2.42E-06  | 7.84E-07 | 3.86E-07 | 1.15E-06 |
| 6h  | 1.14E-06  | 9.47E-06 | 8.86E-07 | 9.55E-06 |
| 12h | 1.96E-06  | 6.88E-06 | 5.04E-06 | 1.04E-05 |
| 24h | 9.51E-07  | 8.82E-06 | 1.43E-06 | 1.20E-05 |
| 36h | 7.83E-07  | 8.43E-06 | 2.34E-06 | 3.26E-06 |
| 48h | 2.52E-06  | 1.59E-05 | 1.27E-05 | 1.17E-05 |
| 72h | 2.17E-06  | 3.53E-06 | 1.68E-05 | 2.41E-06 |
|     | cgd2_80   |          |          |          |
| 2h  | 1.11E-07  | 9.16E-07 | 5.62E-07 | 7.35E-07 |
| 6h  | 4.66E-07  | 1.60E-06 | 1.29E-07 | 4.96E-07 |
| 12h | 6.15E-08  | 8.37E-07 | 1.80E-07 | 7.19E-07 |
| 24h | 1.10E-07  | 4.08E-07 | 4.75E-07 | 4.37E-07 |
| 36h | 1.29E-07  | 1.02E-06 | 5.59E-07 | 3.05E-07 |
| 48h | 3.00E-07  | 6.01E-07 | 1.57E-06 | 5.12E-07 |
| 72h | 3.39E-08  | 8.26E-08 | 1.36E-07 | 3.66E-08 |
|     | cgd2_100  |          |          |          |
| 2h  | 0.00E+00  | 0.00E+00 | 0.00E+00 | 0.00E+00 |
| 6h  | 3.01E-07  | 3.77E-07 | 9.90E-08 | 8.62E-07 |
| 12h | 9.92E-08  | 1.68E-07 | 4.15E-07 | 3.00E-08 |
| 24h | 7.02E-08  | 5.86E-07 | 1.13E-07 | 6.11E-07 |
| 36h | 6.49E-08  | 3.41E-07 | 8.80E-07 | 9.82E-08 |
| 48h | 7.44E-07  | 1.51E-06 | 2.87E-06 | 7.87E-07 |
| 72h | 6.05E-07  | 1.15E-06 | 4.57E-06 | 1.22E-06 |
|     | cgd1_2630 |          |          |          |
| 2h  | 1.82E-07  | 3.13E-07 | 2.40E-07 | 3.36E-07 |
| 6h  | 8.66E-07  | 6.54E-08 | 2.52E-07 | 2.17E-06 |
| 12h | 4.86E-07  | 6.00E-07 | 1.93E-07 | 1.89E-06 |
| 24h | 4.18E-07  | 1.48E-07 | 4.02E-07 | 1.10E-06 |
| 36h | 7.07E-07  | 5.74E-07 | 1.47E-06 | 3.18E-06 |
| 48h | 8.40E-07  | 3.64E-07 | 3.61E-07 | 1.54E-06 |
| 72h | 3.48E-07  | 1.78E-07 | 1.09E-07 | 3.24E-07 |
|     | cgd1_2640 |          |          |          |
| 2h  | 1.96E-06  | 2.54E-06 | 1.12E-06 | 1.00E-05 |
| 6h  | 9.98E-05  | 9.69E-05 | 3.04E-05 | 2.52E-04 |
| 12h | 4.87E-06  | 1.21E-05 | 2.77E-06 | 1.48E-05 |
| 24h | 1.47E-05  | 8.14E-06 | 3.81E-05 | 1.03E-04 |
| 36h | 1.65E-05  | 1.45E-05 | 2.34E-05 | 1.21E-04 |
| 48h | 2.55E-05  | 7.56E-06 | 1.80E-05 | 7.58E-05 |
| 72h | 1.38E-05  | 6.48E-06 | 6.98E-06 | 1.30E-05 |
|     | cgd1_2660 |          |          |          |
| 2h  | 2.07E-06  | 3.36E-06 | 5.36E-06 | 1.60E-06 |
| 6h  | 3.95E-06  | 1.15E-06 | 6.84E-07 | 9.71E-06 |
| 12h | 5.46E-07  | 1.01E-06 | 6.36E-07 | 3.35E-06 |
| 24h | 7.39E-07  | 7.85E-07 | 1.11E-06 | 2.15E-06 |
| 36h | 6.60E-07  | 5.73E-07 | 7.98E-07 | 2.28E-06 |
| 48h | 4.75E-07  | 1.15E-07 | 1.97E-07 | 5.87E-07 |
| 72h | 3.08E-07  | 1.60E-07 | 1.22E-07 | 2.03E-07 |
|     | cgd1_2690 |          |          |          |
| 2h  | 6.84E-05  | 7.89E-06 | 1.93E-05 | 0.00E+00 |
| 6h  | 1.96E-04  | 7.09E-05 | 1.22E-04 | 5.43E-04 |
| 12h | 3.94E-05  | 1.31E-05 | 5.30E-06 | 5.20E-05 |
| 24h | 7.75E-06  | 1.17E-05 | 3.36E-05 | 2.91E-04 |
| 36h | 4.06E-05  | 2.32E-05 | 1.70E-05 | 6.97E-05 |



|     |           |          |          |          |
|-----|-----------|----------|----------|----------|
| 48h | 2.10E-05  | 3.47E-06 | 3.59E-05 | 1.26E-04 |
| 72h | 1.19E-04  | 2.43E-05 | 4.23E-05 | 3.00E-05 |
|     | cgd1_2700 |          |          |          |
| 2h  | 1.39E-08  | 3.68E-07 | 7.92E-08 | 8.50E-07 |
| 6h  | 2.62E-07  | 2.06E-07 | 1.16E-07 | 3.91E-07 |
| 12h | 6.48E-08  | 1.76E-07 | 1.90E-08 | 3.35E-07 |
| 24h | 1.11E-08  | 3.33E-08 | 8.66E-08 | 1.28E-07 |
| 36h | 9.22E-08  | 1.26E-07 | 2.15E-07 | 3.03E-07 |
| 48h | 5.96E-08  | 5.51E-08 | 1.01E-07 | 9.18E-08 |
| 72h | 7.43E-08  | 1.11E-07 | 1.01E-07 | 4.45E-08 |
|     | cgd1_2750 |          |          |          |
| 2h  | 3.79E-05  | 5.49E-05 | 3.88E-05 | 2.39E-05 |
| 6h  | 5.95E-05  | 1.01E-04 | 3.14E-05 | 3.42E-04 |
| 12h | 2.62E-06  | 0.00E+00 | 2.29E-06 | 6.31E-05 |
| 24h | 4.11E-06  | 4.50E-06 | 1.60E-05 | 4.79E-05 |
| 36h | 7.61E-06  | 6.08E-06 | 4.58E-06 | 1.50E-05 |
| 48h | 8.40E-06  | 3.39E-06 | 4.41E-06 | 1.17E-05 |
| 72h | 6.82E-07  | 4.57E-06 | 2.95E-06 | 7.08E-06 |
|     | cgd1_2760 |          |          |          |
| 2h  | 7.88E-06  | 5.00E-06 | 1.77E-06 | 5.96E-06 |
| 6h  | 2.03E-05  | 1.98E-04 | 4.24E-05 | 1.62E-04 |
| 12h | 2.79E-06  | 2.51E-06 | 7.58E-07 | 1.82E-05 |
| 24h | 3.57E-06  | 6.29E-06 | 3.45E-05 | 4.82E-05 |
| 36h | 9.56E-06  | 2.94E-06 | 2.10E-06 | 1.20E-05 |
| 48h | 3.25E-06  | 2.56E-06 | 3.34E-06 | 8.72E-06 |
| 72h | 5.05E-07  | 2.57E-07 | 1.58E-07 | 4.42E-07 |
|     | cgd1_2870 |          |          |          |
| 2h  | 6.57E-03  | 8.12E-03 | 3.25E-04 | 1.11E-04 |
| 6h  | 5.76E-03  | 1.95E-03 | 1.66E-04 | 1.55E-04 |
| 12h | 4.26E-03  | 1.76E-03 | 9.84E-06 | 1.76E-05 |
| 24h | 1.27E-03  | 1.37E-03 | 2.31E-05 | 5.99E-05 |
| 36h | 1.23E-03  | 1.83E-03 | 7.90E-05 | 3.56E-05 |
| 48h | 1.01E-03  | 3.65E-04 | 4.11E-05 | 1.72E-05 |
| 72h | 5.20E-04  | 4.67E-04 | 3.35E-05 | 8.87E-06 |
|     | cgd1_2890 |          |          |          |
| 2h  | 1.78E-04  | 1.13E-04 | 2.98E-04 | 7.15E-04 |
| 6h  | 2.72E-05  | 3.21E-05 | 8.73E-05 | 4.83E-04 |
| 12h | 5.63E-05  | 5.00E-05 | 3.84E-04 | 2.80E-03 |
| 24h | 5.54E-05  | 5.38E-05 | 7.37E-05 | 7.60E-04 |
| 36h | 1.28E-05  | 1.84E-05 | 1.66E-04 | 3.90E-04 |
| 48h | 2.76E-05  | 1.62E-05 | 1.98E-04 | 3.94E-04 |
| 72h | 9.03E-06  | 6.46E-06 | 6.75E-05 | 5.87E-05 |
|     | cgd1_2900 |          |          |          |
| 2h  | 1.14E-06  | 3.22E-06 | 3.27E-07 | 0.00E+00 |
| 6h  | 3.22E-06  | 7.73E-07 | 1.89E-06 | 6.18E-06 |
| 12h | 1.39E-07  | 9.51E-09 | 1.05E-07 | 4.07E-07 |
| 24h | 3.04E-07  | 7.83E-07 | 2.94E-06 | 1.89E-05 |
| 36h | 6.66E-07  | 7.88E-07 | 4.95E-06 | 7.31E-06 |
| 48h | 1.98E-06  | 8.55E-07 | 5.31E-06 | 1.14E-05 |
| 72h | 3.18E-07  | 2.11E-07 | 1.42E-05 | 4.11E-06 |
|     | cgd1_2910 |          |          |          |
| 2h  | 4.66E-04  | 1.29E-03 | 4.73E-06 | 0.00E+00 |
| 6h  | 2.09E-03  | 1.42E-03 | 2.49E-05 | 6.95E-04 |

|     |           |          |          |          |
|-----|-----------|----------|----------|----------|
| 12h | 8.67E-05  | 1.34E-05 | 8.67E-05 | 4.37E-05 |
| 24h | 1.78E-04  | 2.85E-04 | 2.49E-04 | 3.10E-04 |
| 36h | 1.85E-04  | 1.92E-04 | 1.87E-04 | 8.27E-05 |
| 48h | 2.04E-04  | 1.85E-04 | 1.01E-04 | 1.68E-05 |
| 72h | 7.98E-05  | 9.57E-05 | 9.92E-05 | 2.47E-05 |
|     | cgd1_2920 |          |          |          |
| 2h  | 0.00E+00  | 0.00E+00 | 3.83E-07 | 9.43E-06 |
| 6h  | 2.00E-07  | 2.72E-07 | 3.34E-07 | 7.29E-07 |
| 12h | 0.00E+00  | 3.80E-10 | 2.19E-07 | 0.00E+00 |
| 24h | 5.25E-08  | 3.07E-09 | 7.62E-07 | 2.04E-05 |
| 36h | 2.72E-07  | 3.83E-07 | 3.14E-06 | 3.11E-05 |
| 48h | 5.67E-07  | 9.97E-07 | 7.04E-06 | 1.30E-05 |
| 72h | 3.22E-07  | 3.16E-07 | 2.22E-05 | 8.25E-06 |
|     | cgd1_2930 |          |          |          |
| 2h  | 0.00E+00  | 0.00E+00 | 0.00E+00 | 0.00E+00 |
| 6h  | 0.00E+00  | 6.55E-09 | 0.00E+00 | 0.00E+00 |
| 12h | 4.54E-09  | 8.19E-09 | 4.27E-10 | 0.00E+00 |
| 24h | 8.27E-09  | 1.50E-08 | 4.86E-09 | 1.35E-08 |
| 36h | 3.15E-08  | 3.06E-08 | 4.67E-08 | 2.69E-08 |
| 48h | 9.84E-08  | 5.76E-08 | 3.77E-08 | 1.94E-07 |
| 72h | 1.38E-07  | 1.12E-07 | 2.26E-07 | 2.55E-07 |
|     | cgd1_2940 |          |          |          |
| 2h  | 0.00E+00  | 0.00E+00 | 0.00E+00 | 0.00E+00 |
| 6h  | 0.00E+00  | 0.00E+00 | 0.00E+00 | 0.00E+00 |
| 12h | 1.16E-08  | 0.00E+00 | 2.39E-09 | 4.88E-09 |
| 24h | 2.06E-08  | 6.18E-09 | 5.51E-09 | 5.51E-09 |
| 36h | 4.60E-08  | 1.05E-07 | 1.86E-08 | 7.61E-09 |
| 48h | 9.96E-08  | 7.87E-08 | 1.29E-07 | 4.50E-08 |
| 72h | 1.92E-07  | 1.25E-07 | 2.44E-07 | 2.45E-07 |
|     | cgd1_2960 |          |          |          |
| 2h  | 3.50E-03  | 2.35E-03 | 1.22E-03 | 2.76E-03 |
| 6h  | 1.46E-03  | 1.15E-04 | 1.42E-03 | 1.81E-03 |
| 12h | 5.89E-04  | 8.59E-04 | 2.30E-03 | 1.23E-03 |
| 24h | 4.09E-03  | 7.36E-04 | 3.60E-03 | 2.42E-03 |
| 36h | 7.27E-04  | 8.01E-04 | 1.48E-03 | 6.43E-04 |
| 48h | 5.41E-04  | 5.19E-04 | 1.46E-03 | 6.88E-04 |
| 72h | 2.47E-04  | 2.62E-04 | 3.68E-04 | 1.94E-04 |
|     | cgd1_2970 |          |          |          |
| 2h  | 1.32E-08  | 1.38E-09 | 1.30E-08 | 0.00E+00 |
| 6h  | 1.59E-08  | 4.96E-08 | 5.96E-08 | 4.96E-08 |
| 12h | 5.42E-09  | 0.00E+00 | 2.64E-08 | 2.85E-08 |
| 24h | 9.85E-09  | 3.84E-08 | 9.36E-08 | 2.24E-08 |
| 36h | 6.68E-08  | 5.86E-08 | 5.72E-08 | 8.68E-08 |
| 48h | 7.25E-08  | 1.82E-07 | 7.99E-08 | 5.57E-08 |
| 72h | 4.27E-08  | 2.56E-07 | 2.36E-07 | 1.21E-07 |
|     | cgd1_2980 |          |          |          |
| 2h  | 2.13E-08  | 2.36E-07 | 5.62E-07 | 5.98E-07 |
| 6h  | 7.10E-07  | 8.56E-07 | 1.91E-06 | 8.60E-07 |
| 12h | 0.00E+00  | 4.36E-08 | 8.96E-07 | 1.74E-07 |
| 24h | 1.10E-07  | 1.99E-07 | 8.81E-07 | 1.46E-07 |
| 36h | 1.13E-06  | 1.42E-06 | 7.96E-07 | 9.10E-07 |
| 48h | 5.11E-07  | 1.69E-06 | 3.78E-07 | 3.53E-07 |
| 72h | 8.05E-07  | 1.13E-06 | 6.99E-07 | 5.89E-07 |

|     |           |          |          |          |
|-----|-----------|----------|----------|----------|
|     | cgd1_2990 |          |          |          |
| 2h  | 0.00E+00  | 0.00E+00 | 3.66E-09 | 4.18E-09 |
| 6h  | 8.56E-10  | 2.54E-08 | 5.50E-09 | 2.76E-08 |
| 12h | 0.00E+00  | 0.00E+00 | 1.04E-08 | 4.93E-09 |
| 24h | 3.61E-09  | 4.94E-09 | 5.53E-09 | 6.28E-09 |
| 36h | 6.04E-08  | 3.59E-08 | 4.25E-08 | 5.46E-08 |
| 48h | 2.19E-08  | 2.44E-08 | 2.99E-08 | 1.16E-08 |
| 72h | 7.54E-08  | 4.53E-08 | 1.01E-07 | 3.11E-08 |
|     | cgd1_3000 |          |          |          |
| 2h  | 9.65E-06  | 6.34E-05 | 7.07E-06 | 1.09E-05 |
| 6h  | 2.42E-05  | 3.32E-05 | 1.74E-05 | 1.37E-05 |
| 12h | 1.64E-06  | 3.36E-06 | 2.65E-05 | 1.01E-05 |
| 24h | 7.25E-06  | 8.98E-06 | 8.76E-06 | 6.46E-06 |
| 36h | 9.33E-06  | 9.14E-06 | 6.13E-06 | 3.39E-06 |
| 48h | 1.93E-06  | 2.84E-06 | 2.20E-06 | 1.51E-06 |
| 72h | 7.79E-07  | 1.04E-06 | 1.37E-06 | 7.17E-07 |
|     | cgd1_3010 |          |          |          |
| 2h  | 5.04E-07  | 1.88E-06 | 0.00E+00 | 0.00E+00 |
| 6h  | 1.23E-05  | 2.67E-04 | 5.83E-05 | 3.34E-05 |
| 12h | 4.23E-06  | 6.51E-06 | 8.49E-06 | 2.16E-06 |
| 24h | 4.02E-06  | 8.38E-06 | 2.46E-05 | 1.71E-05 |
| 36h | 1.69E-05  | 7.14E-05 | 2.61E-05 | 1.62E-05 |
| 48h | 4.89E-06  | 1.77E-05 | 1.34E-05 | 5.89E-06 |
| 72h | 1.95E-06  | 5.69E-06 | 2.15E-06 | 8.44E-07 |
|     | cgd1_3130 |          |          |          |
| 2h  | 6.02E-05  | 2.79E-05 | 3.35E-05 | 6.25E-05 |
| 6h  | 6.82E-06  | 7.88E-06 | 5.22E-06 | 1.01E-05 |
| 12h | 2.31E-05  | 1.94E-05 | 7.75E-05 | 3.21E-05 |
| 24h | 3.57E-05  | 1.28E-05 | 2.36E-05 | 2.19E-05 |
| 36h | 6.16E-06  | 1.32E-05 | 1.24E-05 | 9.69E-06 |
| 48h | 1.42E-05  | 1.15E-05 | 1.98E-05 | 1.99E-05 |
| 72h | 3.62E-06  | 6.36E-06 | 4.52E-06 | 2.02E-06 |
|     | cgd1_3170 |          |          |          |
| 2h  | 0.00E+00  | 0.00E+00 | 0.00E+00 | 0.00E+00 |
| 6h  | 0.00E+00  | 0.00E+00 | 0.00E+00 | 0.00E+00 |
| 12h | 1.86E-06  | 1.28E-05 | 5.43E-06 | 2.06E-06 |
| 24h | 1.68E-06  | 2.28E-07 | 1.18E-06 | 9.53E-07 |
| 36h | 3.09E-07  | 1.73E-06 | 1.87E-06 | 9.83E-07 |
| 48h | 1.84E-06  | 1.16E-06 | 4.81E-06 | 2.90E-06 |
| 72h | 3.36E-06  | 5.39E-06 | 3.07E-06 | 1.26E-06 |
|     | cgd1_3270 |          |          |          |
| 2h  | 6.44E-09  | 1.58E-08 | 1.45E-08 | 8.58E-08 |
| 6h  | 2.92E-08  | 1.49E-08 | 6.12E-09 | 5.23E-09 |
| 12h | 5.00E-08  | 1.96E-08 | 4.55E-08 | 3.06E-08 |
| 24h | 5.33E-08  | 3.12E-08 | 2.73E-08 | 1.56E-08 |
| 36h | 8.93E-08  | 2.87E-08 | 2.63E-08 | 2.17E-08 |
| 48h | 1.39E-08  | 7.24E-08 | 1.47E-08 | 2.00E-08 |
| 72h | 1.69E-08  | 3.65E-09 | 4.38E-09 | 5.67E-09 |
|     | cgd1_3350 |          |          |          |
| 2h  | 0.00E+00  | 0.00E+00 | 0.00E+00 | 0.00E+00 |
| 6h  | 0.00E+00  | 0.00E+00 | 0.00E+00 | 0.00E+00 |
| 12h | 7.44E-10  | 1.75E-09 | 9.03E-10 | 4.44E-09 |
| 24h | 9.67E-09  | 5.28E-09 | 1.88E-09 | 5.58E-09 |

|     |           |          |          |          |
|-----|-----------|----------|----------|----------|
| 36h | 3.59E-08  | 8.16E-08 | 1.58E-08 | 6.59E-09 |
| 48h | 5.35E-07  | 3.61E-07 | 8.01E-07 | 8.82E-07 |
| 72h | 1.55E-06  | 8.04E-07 | 2.22E-07 | 3.79E-07 |
|     | cgd1_3390 |          |          |          |
| 2h  | 9.61E-07  | 1.09E-06 | 1.32E-07 | 8.67E-07 |
| 6h  | 1.21E-06  | 1.51E-06 | 1.74E-06 | 1.21E-06 |
| 12h | 3.77E-07  | 2.75E-07 | 2.25E-06 | 7.65E-07 |
| 24h | 7.26E-07  | 1.77E-06 | 4.06E-06 | 2.11E-06 |
| 36h | 1.67E-06  | 2.75E-06 | 1.73E-06 | 5.41E-07 |
| 48h | 2.64E-06  | 2.65E-06 | 6.45E-06 | 2.29E-06 |
| 72h | 5.33E-06  | 4.98E-06 | 3.00E-06 | 8.07E-07 |
|     | cgd1_3440 |          |          |          |
| 2h  | 1.47E-05  | 7.30E-06 | 0.00E+00 | 9.86E-06 |
| 6h  | 3.44E-07  | 2.72E-06 | 8.77E-06 | 2.92E-06 |
| 12h | 9.28E-07  | 2.78E-07 | 5.46E-05 | 1.87E-06 |
| 24h | 3.37E-06  | 1.49E-05 | 3.17E-05 | 1.26E-06 |
| 36h | 3.23E-06  | 1.37E-05 | 3.65E-05 | 1.53E-06 |
| 48h | 1.04E-06  | 2.84E-06 | 2.39E-05 | 6.16E-07 |
| 72h | 6.24E-07  | 1.52E-06 | 1.74E-05 | 1.49E-06 |
|     | cgd5_1440 |          |          |          |
| 2h  | 9.48E-05  | 7.84E-05 | 4.44E-04 | 4.00E-04 |
| 6h  | 2.14E-06  | 3.44E-05 | 3.45E-06 | 1.87E-06 |
| 12h | 1.02E-03  | 2.77E-03 | 2.93E-04 | 1.54E-02 |
| 24h | 4.60E-04  | 1.03E-03 | 5.76E-04 | 2.12E-03 |
| 36h | 4.21E-04  | 1.72E-03 | 2.04E-03 | 4.64E-03 |
| 48h | 4.37E-04  | 2.18E-04 | 6.62E-04 | 1.75E-03 |
| 72h | 5.88E-05  | 2.09E-04 | 1.28E-04 | 1.45E-04 |
|     | cgd5_1450 |          |          |          |
| 2h  | 1.21E-07  | 1.34E-07 | 2.57E-07 | 2.37E-07 |
| 6h  | 4.48E-08  | 1.09E-07 | 2.30E-07 | 3.36E-07 |
| 12h | 3.32E-06  | 4.48E-06 | 1.15E-06 | 8.20E-06 |
| 24h | 2.27E-06  | 7.18E-06 | 1.96E-06 | 1.88E-06 |
| 36h | 1.23E-06  | 2.74E-06 | 5.07E-06 | 9.08E-06 |
| 48h | 1.40E-06  | 2.19E-06 | 4.17E-06 | 2.24E-06 |
| 72h | 6.12E-07  | 1.06E-06 | 1.10E-06 | 7.40E-07 |
|     | cgd5_1460 |          |          |          |
| 2h  | 4.89E-05  | 2.73E-04 | 5.96E-05 | 3.85E-05 |
| 6h  | 2.42E-05  | 5.59E-04 | 1.24E-04 | 8.63E-04 |
| 12h | 5.33E-04  | 1.35E-03 | 3.78E-04 | 3.41E-03 |
| 24h | 1.14E-04  | 9.64E-04 | 3.70E-04 | 1.80E-03 |
| 36h | 2.09E-04  | 1.22E-03 | 1.82E-03 | 1.30E-03 |
| 48h | 2.32E-04  | 2.80E-04 | 4.54E-03 | 1.26E-03 |
| 72h | 1.90E-04  | 1.98E-03 | 5.66E-04 | 8.73E-04 |
|     | cgd5_1480 |          |          |          |
| 2h  | 1.92E-08  | 5.16E-10 | 1.63E-09 | 0.00E+00 |
| 6h  | 0.00E+00  | 1.47E-09 | 0.00E+00 | 0.00E+00 |
| 12h | 1.82E-06  | 6.53E-07 | 3.12E-07 | 2.87E-06 |
| 24h | 1.42E-07  | 7.87E-07 | 3.83E-07 | 4.75E-07 |
| 36h | 7.04E-07  | 1.09E-06 | 2.04E-06 | 2.74E-06 |
| 48h | 3.58E-07  | 2.36E-07 | 8.36E-06 | 3.18E-07 |
| 72h | 6.61E-08  | 1.36E-07 | 6.84E-08 | 1.14E-07 |
|     | cgd5_1490 |          |          |          |
| 2h  | 2.25E-06  | 0.00E+00 | 0.00E+00 | 0.00E+00 |

|     |           |          |          |          |
|-----|-----------|----------|----------|----------|
| 6h  | 2.94E-05  | 1.99E-06 | 1.31E-05 | 1.51E-03 |
| 12h | 6.62E-05  | 2.09E-04 | 2.00E-05 | 1.27E-04 |
| 24h | 1.42E-04  | 1.01E-05 | 5.95E-05 | 4.28E-04 |
| 36h | 8.09E-04  | 2.77E-04 | 3.01E-04 | 4.08E-04 |
| 48h | 4.60E-04  | 5.76E-05 | 1.11E-04 | 4.95E-04 |
| 72h | 1.03E-04  | 3.98E-05 | 9.89E-05 | 5.29E-05 |
|     | cgd5_1500 |          |          |          |
| 2h  | 2.84E-07  | 4.27E-08 | 9.33E-07 | 2.14E-06 |
| 6h  | 0.00E+00  | 3.25E-08 | 1.36E-08 | 4.13E-09 |
| 12h | 1.52E-06  | 9.22E-07 | 1.19E-06 | 2.25E-06 |
| 24h | 1.14E-07  | 4.24E-06 | 1.33E-06 | 5.40E-07 |
| 36h | 1.92E-06  | 3.30E-06 | 8.42E-06 | 3.41E-06 |
| 48h | 8.71E-07  | 2.61E-06 | 2.03E-06 | 2.64E-06 |
| 72h | 6.79E-07  | 5.22E-07 | 1.92E-07 | 4.56E-07 |
|     | cgd5_1580 |          |          |          |
| 2h  | 1.53E-03  | 7.32E-03 | 8.09E-03 | 1.04E-03 |
| 6h  | 2.56E-03  | 1.01E-02 | 1.36E-02 | 1.75E-02 |
| 12h | 6.83E-04  | 2.17E-03 | 2.79E-03 | 7.52E-03 |
| 24h | 7.58E-04  | 6.55E-03 | 7.15E-03 | 7.23E-03 |
| 36h | 1.24E-03  | 4.25E-03 | 5.32E-03 | 1.95E-03 |
| 48h | 3.46E-04  | 1.20E-03 | 1.40E-03 | 9.10E-04 |
| 72h | 6.87E-05  | 3.94E-04 | 8.67E-04 | 3.57E-04 |
|     | cgd5_1590 |          |          |          |
| 2h  | 7.45E-07  | 1.11E-07 | 2.22E-07 | 6.85E-08 |
| 6h  | 6.59E-08  | 8.13E-08 | 3.83E-08 | 1.56E-08 |
| 12h | 2.38E-05  | 7.67E-06 | 1.74E-06 | 9.02E-06 |
| 24h | 1.84E-06  | 2.25E-06 | 9.86E-07 | 1.20E-06 |
| 36h | 1.54E-06  | 1.94E-06 | 2.76E-06 | 1.70E-06 |
| 48h | 1.33E-06  | 6.69E-07 | 1.26E-06 | 8.20E-07 |
| 72h | 5.56E-08  | 3.85E-07 | 5.12E-07 | 2.79E-07 |
|     | cgd5_1600 |          |          |          |
| 2h  | 9.48E-07  | 3.50E-06 | 5.24E-06 | 1.08E-06 |
| 6h  | 2.21E-06  | 2.39E-06 | 4.34E-06 | 6.10E-06 |
| 12h | 5.69E-06  | 7.57E-06 | 2.81E-06 | 1.38E-05 |
| 24h | 1.82E-06  | 7.37E-06 | 1.30E-05 | 9.02E-06 |
| 36h | 3.42E-06  | 1.80E-05 | 2.02E-05 | 8.02E-06 |
| 48h | 3.50E-06  | 7.11E-06 | 9.40E-06 | 1.91E-06 |
| 72h | 2.94E-07  | 2.93E-06 | 2.42E-06 | 2.73E-06 |
|     | cgd5_1610 |          |          |          |
| 2h  | 2.48E-06  | 2.29E-06 | 1.84E-06 | 1.81E-06 |
| 6h  | 7.33E-07  | 7.90E-07 | 1.32E-06 | 4.95E-06 |
| 12h | 2.77E-06  | 2.79E-06 | 8.85E-07 | 2.13E-06 |
| 24h | 1.79E-06  | 2.59E-06 | 4.40E-06 | 5.37E-06 |
| 36h | 1.05E-06  | 4.37E-06 | 4.10E-06 | 1.85E-06 |
| 48h | 1.72E-06  | 1.54E-06 | 2.47E-06 | 2.20E-06 |
| 72h | 1.12E-07  | 8.15E-07 | 1.23E-06 | 6.35E-07 |
|     | cgd5_1620 |          |          |          |
| 2h  | 1.68E-06  | 6.97E-07 | 4.77E-07 | 8.23E-07 |
| 6h  | 3.00E-07  | 3.06E-07 | 3.36E-07 | 6.39E-07 |
| 12h | 5.28E-07  | 5.40E-07 | 1.67E-07 | 7.09E-07 |
| 24h | 7.04E-07  | 6.40E-07 | 8.33E-07 | 9.78E-07 |
| 36h | 8.39E-07  | 1.50E-06 | 1.54E-06 | 4.71E-07 |
| 48h | 1.04E-06  | 9.03E-07 | 1.05E-06 | 5.35E-07 |

|     |           |          |          |          |
|-----|-----------|----------|----------|----------|
| 72h | 8.32E-08  | 2.54E-07 | 5.06E-07 | 3.26E-07 |
|     | cgd5_1630 |          |          |          |
| 2h  | 6.72E-03  | 7.05E-04 | 0.00E+00 | 1.41E-02 |
| 6h  | 4.29E-04  | 5.66E-04 | 6.59E-04 | 1.08E-02 |
| 12h | 4.98E-04  | 4.46E-04 | 1.28E-04 | 6.39E-03 |
| 24h | 5.02E-04  | 1.60E-03 | 4.35E-04 | 5.41E-04 |
| 36h | 5.51E-04  | 4.28E-04 | 3.78E-04 | 1.24E-03 |
| 48h | 3.82E-04  | 3.81E-04 | 5.16E-04 | 2.33E-03 |
| 72h | 3.52E-04  | 1.23E-04 | 3.79E-04 | 5.39E-04 |
|     | cgd5_2680 |          |          |          |
| 2h  | 0.00E+00  | 0.00E+00 | 0.00E+00 | 0.00E+00 |
| 6h  | 1.35E-06  | 0.00E+00 | 3.36E-07 | 5.30E-06 |
| 12h | 9.01E-08  | 7.71E-09 | 2.45E-07 | 1.19E-07 |
| 24h | 3.59E-07  | 4.33E-07 | 1.14E-06 | 4.02E-06 |
| 36h | 1.59E-07  | 3.03E-07 | 4.25E-06 | 3.72E-06 |
| 48h | 1.59E-05  | 1.09E-05 | 2.58E-05 | 3.67E-05 |
| 72h | 9.56E-06  | 3.60E-06 | 1.35E-05 | 1.09E-05 |
|     | cgd5_2690 |          |          |          |
| 2h  | 2.99E-08  | 0.00E+00 | 0.00E+00 | 0.00E+00 |
| 6h  | 1.04E-07  | 3.15E-08 | 1.12E-08 | 7.02E-08 |
| 12h | 2.40E-07  | 6.31E-08 | 5.35E-08 | 8.96E-08 |
| 24h | 9.89E-08  | 3.01E-04 | 1.28E-07 | 1.64E-06 |
| 36h | 3.47E-07  | 1.10E-07 | 1.43E-07 | 3.24E-07 |
| 48h | 4.58E-06  | 3.30E-06 | 3.56E-06 | 1.20E-06 |
| 72h | 7.52E-07  | 3.45E-07 | 3.29E-07 | 3.67E-07 |
|     | cgd5_2730 |          |          |          |
| 2h  | 8.27E-09  | 0.00E+00 | 0.00E+00 | 1.82E-09 |
| 6h  | 7.89E-09  | 0.00E+00 | 0.00E+00 | 0.00E+00 |
| 12h | 2.27E-06  | 5.27E-06 | 1.52E-06 | 1.31E-06 |
| 24h | 9.74E-07  | 1.42E-06 | 3.61E-07 | 9.27E-07 |
| 36h | 2.89E-07  | 6.05E-08 | 4.33E-07 | 4.54E-07 |
| 48h | 3.46E-07  | 1.34E-07 | 5.22E-07 | 2.01E-07 |
| 72h | 1.12E-06  | 4.46E-07 | 2.52E-07 | 2.63E-07 |
|     | cgd5_2740 |          |          |          |
| 2h  | 1.80E-07  | 2.03E-08 | 0.00E+00 | 3.44E-09 |
| 6h  | 4.54E-07  | 4.66E-07 | 4.11E-07 | 2.85E-07 |
| 12h | 5.51E-05  | 5.58E-05 | 4.60E-05 | 2.99E-05 |
| 24h | 3.74E-06  | 2.63E-06 | 2.57E-06 | 4.17E-06 |
| 36h | 1.53E-06  | 1.01E-06 | 1.03E-05 | 6.43E-06 |
| 48h | 3.33E-07  | 1.74E-07 | 1.29E-06 | 1.57E-06 |
| 72h | 1.02E-06  | 8.53E-07 | 9.58E-07 | 3.36E-07 |
|     | cgd5_2760 |          |          |          |
| 2h  | 0.00E+00  | 0.00E+00 | 0.00E+00 | 0.00E+00 |
| 6h  | 0.00E+00  | 0.00E+00 | 0.00E+00 | 0.00E+00 |
| 12h | 1.06E-04  | 1.28E-03 | 4.98E-05 | 1.87E-05 |
| 24h | 4.26E-06  | 3.09E-06 | 4.65E-06 | 8.77E-06 |
| 36h | 2.44E-06  | 1.92E-06 | 8.73E-06 | 1.49E-05 |
| 48h | 4.58E-07  | 1.49E-07 | 1.35E-06 | 4.00E-07 |
| 72h | 8.54E-07  | 3.61E-07 | 2.99E-07 | 3.37E-07 |
|     | cgd5_2770 |          |          |          |
| 2h  | 1.05E-08  | 0.00E+00 | 0.00E+00 | 9.33E-10 |
| 6h  | 8.30E-08  | 5.23E-08 | 1.00E-08 | 2.50E-08 |
| 12h | 8.28E-07  | 1.32E-06 | 6.34E-07 | 1.10E-06 |

|           |          |          |          |          |
|-----------|----------|----------|----------|----------|
| 24h       | 2.83E-07 | 2.05E-07 | 1.87E-07 | 3.26E-07 |
| 36h       | 5.45E-07 | 2.33E-07 | 7.17E-07 | 8.62E-07 |
| 48h       | 3.39E-07 | 4.50E-07 | 5.75E-07 | 3.38E-07 |
| 72h       | 1.46E-06 | 5.93E-07 | 3.79E-07 | 2.62E-07 |
| cgd5_2790 |          |          |          |          |
| 2h        | 8.83E-08 | 3.03E-08 | 2.82E-07 | 1.61E-07 |
| 6h        | 0.00E+00 | 3.20E-07 | 2.03E-07 | 1.14E-07 |
| 12h       | 4.83E-06 | 5.32E-06 | 9.53E-06 | 6.37E-06 |
| 24h       | 1.23E-06 | 1.01E-06 | 6.74E-06 | 3.25E-06 |
| 36h       | 1.57E-06 | 3.94E-07 | 6.73E-06 | 2.08E-05 |
| 48h       | 7.44E-06 | 1.82E-06 | 1.64E-05 | 8.01E-06 |
| 72h       | 4.89E-06 | 1.75E-06 | 1.56E-05 | 2.57E-05 |
| cgd5_2810 |          |          |          |          |
| 2h        | 2.06E-06 | 1.35E-06 | 8.95E-08 | 3.75E-06 |
| 6h        | 1.50E-06 | 3.35E-07 | 1.64E-08 | 1.88E-06 |
| 12h       | 1.26E-06 | 1.79E-06 | 6.59E-06 | 2.13E-06 |
| 24h       | 7.31E-07 | 4.16E-07 | 2.99E-06 | 2.13E-05 |
| 36h       | 3.63E-07 | 3.35E-07 | 1.29E-06 | 3.45E-06 |
| 48h       | 8.09E-07 | 4.56E-07 | 4.33E-06 | 2.80E-06 |
| 72h       | 4.60E-06 | 1.03E-06 | 5.81E-07 | 3.00E-06 |
| cgd5_2820 |          |          |          |          |
| 2h        | 0.00E+00 | 0.00E+00 | 0.00E+00 | 5.90E-10 |
| 6h        | 0.00E+00 | 0.00E+00 | 0.00E+00 | 0.00E+00 |
| 12h       | 9.97E-07 | 6.22E-07 | 1.87E-07 | 1.42E-07 |
| 24h       | 1.86E-07 | 1.28E-07 | 7.58E-08 | 1.23E-07 |
| 36h       | 3.13E-07 | 6.29E-08 | 2.88E-07 | 4.36E-07 |
| 48h       | 1.39E-07 | 1.11E-07 | 1.21E-07 | 6.77E-08 |
| 72h       | 8.24E-08 | 1.42E-07 | 6.21E-08 | 5.76E-08 |
| cgd5_2840 |          |          |          |          |
| 2h        | 0.00E+00 | 0.00E+00 | 0.00E+00 | 0.00E+00 |
| 6h        | 0.00E+00 | 2.69E-06 | 5.80E-06 | 1.66E-05 |
| 12h       | 1.06E-04 | 7.71E-05 | 1.47E-04 | 3.49E-05 |
| 24h       | 3.88E-05 | 4.26E-05 | 1.11E-04 | 2.79E-05 |
| 36h       | 9.92E-05 | 2.80E-05 | 7.86E-05 | 1.14E-04 |
| 48h       | 3.57E-03 | 1.93E-04 | 1.81E-04 | 2.35E-04 |
| 72h       | 9.05E-04 | 1.58E-03 | 1.28E-04 | 2.01E-04 |
| cgd5_2850 |          |          |          |          |
| 2h        | 0.00E+00 | 0.00E+00 | 0.00E+00 | 0.00E+00 |
| 6h        | 9.08E-06 | 0.00E+00 | 1.60E-05 | 0.00E+00 |
| 12h       | 0.00E+00 | 0.00E+00 | 9.48E-06 | 7.31E-06 |
| 24h       | 5.79E-06 | 2.80E-06 | 2.17E-05 | 2.34E-05 |
| 36h       | 1.62E-05 | 1.40E-05 | 4.14E-06 | 6.05E-05 |
| 48h       | 3.70E-04 | 2.24E-04 | 3.04E-05 | 7.03E-05 |
| 72h       | 4.97E-04 | 1.37E-04 | 4.09E-05 | 2.42E-04 |
| cgd5_2860 |          |          |          |          |
| 2h        | 0.00E+00 | 4.43E-06 | 0.00E+00 | 0.00E+00 |
| 6h        | 0.00E+00 | 5.89E-08 | 0.00E+00 | 0.00E+00 |
| 12h       | 6.90E-04 | 8.36E-04 | 1.83E-03 | 1.13E-03 |
| 24h       | 8.38E-05 | 7.02E-05 | 1.86E-04 | 9.08E-05 |
| 36h       | 4.63E-05 | 2.24E-05 | 5.92E-04 | 5.32E-04 |
| 48h       | 9.34E-05 | 1.26E-05 | 2.80E-04 | 5.55E-05 |
| 72h       | 1.13E-04 | 1.95E-05 | 5.54E-05 | 6.28E-05 |
| cgd5_3090 |          |          |          |          |

|     |           |          |          |          |
|-----|-----------|----------|----------|----------|
| 2h  | 5.36E-06  | 4.36E-05 | 2.07E-06 | 2.97E-06 |
| 6h  | 5.28E-06  | 3.70E-05 | 3.45E-05 | 2.68E-05 |
| 12h | 8.34E-08  | 2.09E-06 | 4.45E-07 | 1.73E-07 |
| 24h | 4.04E-06  | 1.99E-05 | 1.72E-05 | 1.18E-05 |
| 36h | 7.46E-06  | 2.07E-05 | 8.71E-06 | 5.66E-06 |
| 48h | 1.18E-04  | 1.31E-04 | 2.70E-05 | 1.67E-05 |
| 72h | 7.27E-06  | 2.56E-05 | 4.71E-06 | 1.61E-05 |
|     | cgd5_3130 |          |          |          |
| 2h  | 4.00E-08  | 4.41E-08 | 0.00E+00 | 2.78E-08 |
| 6h  | 1.89E-08  | 0.00E+00 | 0.00E+00 | 1.01E-08 |
| 12h | 4.31E-07  | 1.36E-06 | 7.00E-07 | 4.13E-07 |
| 24h | 5.63E-07  | 5.37E-07 | 4.19E-07 | 5.44E-07 |
| 36h | 4.59E-07  | 2.50E-06 | 1.52E-06 | 1.27E-06 |
| 48h | 1.50E-05  | 5.92E-06 | 3.50E-06 | 5.73E-06 |
| 72h | 3.32E-06  | 3.39E-06 | 1.80E-06 | 3.62E-06 |
|     | cgd5_3140 |          |          |          |
| 2h  | 5.26E-07  | 9.49E-08 | 5.13E-08 | 6.49E-07 |
| 6h  | 2.35E-07  | 4.80E-08 | 3.46E-07 | 1.81E-07 |
| 12h | 1.55E-05  | 7.02E-05 | 5.10E-05 | 2.98E-05 |
| 24h | 1.69E-05  | 3.51E-05 | 5.00E-06 | 4.30E-06 |
| 36h | 2.64E-06  | 1.47E-05 | 1.56E-05 | 1.44E-05 |
| 48h | 1.07E-04  | 7.11E-05 | 1.53E-05 | 2.18E-05 |
| 72h | 2.42E-05  | 2.95E-05 | 1.36E-05 | 2.03E-05 |
|     | cgd5_3190 |          |          |          |
| 2h  | 0.00E+00  | 0.00E+00 | 0.00E+00 | 0.00E+00 |
| 6h  | 0.00E+00  | 0.00E+00 | 0.00E+00 | 0.00E+00 |
| 12h | 0.00E+00  | 0.00E+00 | 0.00E+00 | 4.15E-08 |
| 24h | 6.33E-09  | 6.34E-08 | 1.85E-07 | 1.76E-08 |
| 36h | 8.10E-07  | 4.83E-07 | 5.41E-07 | 1.53E-07 |
| 48h | 7.67E-07  | 3.02E-06 | 2.34E-07 | 2.19E-07 |
| 72h | 8.68E-07  | 1.36E-06 | 4.45E-07 | 4.71E-07 |
|     | cgd5_3200 |          |          |          |
| 2h  | 0.00E+00  | 8.42E-08 | 0.00E+00 | 0.00E+00 |
| 6h  | 3.22E-06  | 1.19E-06 | 2.34E-06 | 2.89E-06 |
| 12h | 6.12E-07  | 2.71E-07 | 4.09E-07 | 1.38E-06 |
| 24h | 6.16E-07  | 4.74E-07 | 2.35E-06 | 1.26E-06 |
| 36h | 2.28E-06  | 3.98E-06 | 3.25E-06 | 8.76E-06 |
| 48h | 2.59E-06  | 9.22E-07 | 8.13E-07 | 6.49E-07 |
| 72h | 5.52E-06  | 1.84E-06 | 2.10E-06 | 5.43E-06 |
|     | cgd5_3230 |          |          |          |
| 2h  | 0.00E+00  | 0.00E+00 | 0.00E+00 | 0.00E+00 |
| 6h  | 3.12E-06  | 2.21E-06 | 3.97E-06 | 4.04E-06 |
| 12h | 2.27E-07  | 0.00E+00 | 7.17E-07 | 1.15E-07 |
| 24h | 5.54E-07  | 5.50E-07 | 1.63E-06 | 1.36E-06 |
| 36h | 1.21E-06  | 8.18E-07 | 8.60E-07 | 9.64E-07 |
| 48h | 2.59E-06  | 4.64E-07 | 8.82E-07 | 4.27E-07 |
| 72h | 4.42E-07  | 2.50E-07 | 1.41E-07 | 1.75E-07 |
|     | cgd5_3300 |          |          |          |
| 2h  | 4.82E-06  | 2.73E-06 | 2.98E-06 | 1.02E-05 |
| 6h  | 8.24E-07  | 1.95E-06 | 2.35E-06 | 3.82E-06 |
| 12h | 2.57E-06  | 3.47E-06 | 2.51E-05 | 3.02E-05 |
| 24h | 3.01E-06  | 8.33E-06 | 4.42E-06 | 3.74E-06 |
| 36h | 1.47E-06  | 3.42E-06 | 2.42E-06 | 8.15E-06 |



|     |           |          |          |          |
|-----|-----------|----------|----------|----------|
| 48h | 1.42E-06  | 8.16E-07 | 2.46E-06 | 1.53E-06 |
| 72h | 1.07E-06  | 5.91E-07 | 1.51E-07 | 7.30E-07 |
|     | cgd5_3310 |          |          |          |
| 2h  | 9.27E-04  | 1.07E-03 | 8.68E-04 | 1.73E-03 |
| 6h  | 4.45E-04  | 7.63E-04 | 9.44E-04 | 1.28E-03 |
| 12h | 8.96E-04  | 3.07E-03 | 3.46E-03 | 1.75E-03 |
| 24h | 9.32E-04  | 2.10E-03 | 1.29E-03 | 1.24E-03 |
| 36h | 5.02E-04  | 6.66E-04 | 7.08E-04 | 3.37E-04 |
| 48h | 1.33E-03  | 5.14E-04 | 8.87E-04 | 1.92E-04 |
| 72h | 2.32E-03  | 2.26E-04 | 1.41E-04 | 9.23E-05 |
|     | cgd5_3330 |          |          |          |
| 2h  | 1.03E-06  | 2.94E-07 | 2.60E-07 | 5.08E-07 |
| 6h  | 1.54E-06  | 2.22E-07 | 6.05E-07 | 3.81E-07 |
| 12h | 1.02E-07  | 1.00E-07 | 6.33E-07 | 1.34E-07 |
| 24h | 2.10E-07  | 6.42E-08 | 5.71E-07 | 4.30E-07 |
| 36h | 5.34E-07  | 9.18E-07 | 5.86E-07 | 5.24E-07 |
| 48h | 9.82E-07  | 2.07E-07 | 7.53E-07 | 2.17E-07 |
| 72h | 2.51E-07  | 1.59E-07 | 1.81E-07 | 3.00E-07 |
|     | cgd5_3360 |          |          |          |
| 2h  | 4.22E-06  | 3.27E-06 | 2.32E-06 | 6.30E-06 |
| 6h  | 2.07E-05  | 3.32E-06 | 9.18E-06 | 6.99E-06 |
| 12h | 5.93E-07  | 4.79E-07 | 2.92E-06 | 1.36E-06 |
| 24h | 1.93E-06  | 1.54E-06 | 6.44E-06 | 4.65E-06 |
| 36h | 4.01E-06  | 1.48E-06 | 2.10E-06 | 2.12E-06 |
| 48h | 3.67E-06  | 1.05E-06 | 2.31E-06 | 1.62E-06 |
| 72h | 7.76E-07  | 1.99E-07 | 1.91E-07 | 4.15E-07 |
|     | cgd5_3370 |          |          |          |
| 2h  | 1.12E-05  | 1.49E-05 | 0.00E+00 | 4.23E-06 |
| 6h  | 3.36E-05  | 1.35E-04 | 4.87E-05 | 1.72E-05 |
| 12h | 5.12E-07  | 8.92E-06 | 5.79E-07 | 2.65E-06 |
| 24h | 2.97E-06  | 7.01E-06 | 2.90E-05 | 2.17E-05 |
| 36h | 1.19E-05  | 8.98E-05 | 1.72E-05 | 9.56E-06 |
| 48h | 1.64E-05  | 1.26E-05 | 1.04E-05 | 5.98E-06 |
| 72h | 6.69E-06  | 4.99E-06 | 3.12E-06 | 3.60E-06 |
|     | cgd5_3390 |          |          |          |
| 2h  | 1.54E-05  | 5.00E-05 | 7.78E-06 | 2.00E-06 |
| 6h  | 1.39E-05  | 2.54E-05 | 2.46E-05 | 3.39E-05 |
| 12h | 3.19E-06  | 2.39E-05 | 4.14E-05 | 6.73E-06 |
| 24h | 8.67E-06  | 1.56E-04 | 4.14E-05 | 1.25E-05 |
| 36h | 1.92E-05  | 9.82E-05 | 7.06E-05 | 2.40E-05 |
| 48h | 2.32E-05  | 4.12E-05 | 1.65E-04 | 1.19E-05 |
| 72h | 3.04E-04  | 4.00E-04 | 1.50E-03 | 2.02E-04 |
|     | cgd5_3410 |          |          |          |
| 2h  | 1.69E-04  | 0.00E+00 | 6.38E-06 | 0.00E+00 |
| 6h  | 0.00E+00  | 3.18E-07 | 5.60E-05 | 6.59E-06 |
| 12h | 0.00E+00  | 0.00E+00 | 5.02E-05 | 0.00E+00 |
| 24h | 2.58E-06  | 1.50E-06 | 4.29E-06 | 1.30E-05 |
| 36h | 1.59E-05  | 6.02E-06 | 1.78E-05 | 4.11E-05 |
| 48h | 8.14E-04  | 1.39E-04 | 5.67E-04 | 1.14E-04 |
| 72h | 4.51E-04  | 2.22E-04 | 4.93E-04 | 5.20E-04 |
|     | cgd5_3470 |          |          |          |
| 2h  | 3.68E-04  | 7.35E-05 | 5.63E-05 | 5.59E-04 |
| 6h  | 6.77E-05  | 4.80E-05 | 1.08E-04 | 3.56E-04 |

|     |           |          |          |          |
|-----|-----------|----------|----------|----------|
| 12h | 8.69E-06  | 3.54E-05 | 1.52E-04 | 2.80E-04 |
| 24h | 7.87E-05  | 3.31E-05 | 3.64E-04 | 9.67E-05 |
| 36h | 5.95E-05  | 2.88E-05 | 3.01E-04 | 4.33E-04 |
| 48h | 1.56E-04  | 2.50E-05 | 1.69E-04 | 3.74E-04 |
| 72h | 6.08E-05  | 4.30E-05 | 1.07E-04 | 2.15E-04 |
|     | cgd5_3500 |          |          |          |
| 2h  | 4.88E-03  | 1.55E-03 | 5.07E-05 | 1.30E-04 |
| 6h  | 6.50E-04  | 3.35E-04 | 3.96E-04 | 3.52E-05 |
| 12h | 1.04E-03  | 1.05E-03 | 8.00E-04 | 5.61E-04 |
| 24h | 2.75E-03  | 8.80E-04 | 9.60E-04 | 5.58E-04 |
| 36h | 2.00E-03  | 5.18E-04 | 4.08E-04 | 5.59E-04 |
| 48h | 3.87E-03  | 1.99E-03 | 3.83E-04 | 5.87E-04 |
| 72h | 5.48E-04  | 4.73E-04 | 1.79E-04 | 6.74E-04 |
|     | cgd5_3510 |          |          |          |
| 2h  | 2.98E-04  | 6.58E-05 | 6.06E-05 | 2.51E-04 |
| 6h  | 1.25E-04  | 4.57E-05 | 2.80E-04 | 5.52E-04 |
| 12h | 1.86E-05  | 3.27E-05 | 4.80E-04 | 3.55E-04 |
| 24h | 7.07E-05  | 4.79E-05 | 7.58E-04 | 6.55E-04 |
| 36h | 2.77E-05  | 1.73E-05 | 1.72E-04 | 6.87E-04 |
| 48h | 2.99E-05  | 8.23E-06 | 9.69E-05 | 3.12E-04 |
| 72h | 1.50E-05  | 2.02E-05 | 8.76E-05 | 6.85E-05 |
|     | cgd5_3520 |          |          |          |
| 2h  | 5.62E-06  | 1.43E-06 | 6.68E-07 | 6.10E-07 |
| 6h  | 4.02E-06  | 1.05E-06 | 3.81E-06 | 1.18E-06 |
| 12h | 1.65E-06  | 1.52E-06 | 4.66E-06 | 2.17E-06 |
| 24h | 2.45E-06  | 1.44E-06 | 8.98E-06 | 6.20E-06 |
| 36h | 2.04E-06  | 1.21E-06 | 1.35E-06 | 6.38E-06 |
| 48h | 4.09E-06  | 4.64E-07 | 1.74E-06 | 2.45E-06 |
| 72h | 1.48E-06  | 4.21E-07 | 6.33E-07 | 1.67E-06 |
|     | cgd5_3540 |          |          |          |
| 2h  | 2.79E-04  | 1.76E-04 | 1.21E-04 | 3.08E-04 |
| 6h  | 3.00E-03  | 2.96E-04 | 7.90E-04 | 6.28E-04 |
| 12h | 1.58E-04  | 1.19E-04 | 9.30E-04 | 8.15E-04 |
| 24h | 4.85E-04  | 1.49E-04 | 1.63E-03 | 3.40E-04 |
| 36h | 3.00E-04  | 1.93E-04 | 5.11E-04 | 1.27E-03 |
| 48h | 2.04E-04  | 7.39E-05 | 4.46E-04 | 4.50E-04 |
| 72h | 3.07E-05  | 1.61E-05 | 1.09E-04 | 2.02E-04 |
|     | cgd5_3550 |          |          |          |
| 2h  | 3.96E-08  | 1.20E-08 | 6.76E-09 | 1.04E-08 |
| 6h  | 1.36E-08  | 2.96E-09 | 2.31E-08 | 1.36E-08 |
| 12h | 1.09E-06  | 1.16E-06 | 8.70E-07 | 5.80E-07 |
| 24h | 2.05E-07  | 1.36E-07 | 2.10E-07 | 2.47E-08 |
| 36h | 2.44E-08  | 6.42E-08 | 2.15E-07 | 7.91E-07 |
| 48h | 4.81E-08  | 5.33E-08 | 7.23E-08 | 5.29E-08 |
| 72h | 4.97E-08  | 4.36E-08 | 1.16E-08 | 1.04E-07 |
|     | cgd5_3560 |          |          |          |
| 2h  | 9.41E-05  | 4.68E-05 | 4.81E-05 | 1.07E-04 |
| 6h  | 4.59E-05  | 4.09E-05 | 1.47E-04 | 2.12E-04 |
| 12h | 3.81E-05  | 3.09E-05 | 1.54E-03 | 2.53E-04 |
| 24h | 1.01E-04  | 6.28E-05 | 8.31E-04 | 2.27E-04 |
| 36h | 2.61E-05  | 1.56E-05 | 1.97E-04 | 3.82E-04 |
| 48h | 4.69E-05  | 1.48E-05 | 1.23E-04 | 1.18E-04 |
| 72h | 0.00E+00  | 7.50E-06 | 2.96E-05 | 1.19E-04 |

|     |           |          |          |          |
|-----|-----------|----------|----------|----------|
|     | cgd5_3570 |          |          |          |
| 2h  | 8.91E-08  | 7.85E-08 | 9.53E-09 | 1.31E-08 |
| 6h  | 1.43E-08  | 3.68E-09 | 2.03E-09 | 2.80E-09 |
| 12h | 0.00E+00  | 0.00E+00 | 6.01E-08 | 1.56E-08 |
| 24h | 3.75E-09  | 6.04E-09 | 2.95E-09 | 4.35E-09 |
| 36h | 1.33E-07  | 1.06E-07 | 1.01E-08 | 1.45E-08 |
| 48h | 6.06E-07  | 3.40E-07 | 2.57E-07 | 6.03E-07 |
| 72h | 9.99E-08  | 4.17E-08 | 9.52E-09 | 1.81E-08 |
|     | cgd5_3590 |          |          |          |
| 2h  | 3.33E-05  | 2.06E-05 | 6.71E-06 | 2.29E-05 |
| 6h  | 1.62E-04  | 1.64E-05 | 4.58E-05 | 3.71E-05 |
| 12h | 2.45E-07  | 1.90E-06 | 1.14E-05 | 1.32E-06 |
| 24h | 8.67E-06  | 3.62E-06 | 1.00E-05 | 6.63E-06 |
| 36h | 2.87E-06  | 1.74E-06 | 6.01E-06 | 1.13E-05 |
| 48h | 4.66E-06  | 9.32E-07 | 4.23E-06 | 6.54E-06 |
| 72h | 4.16E-07  | 1.10E-07 | 7.73E-07 | 2.99E-06 |
|     | cgd5_3620 |          |          |          |
| 2h  | 0.00E+00  | 0.00E+00 | 0.00E+00 | 0.00E+00 |
| 6h  | 0.00E+00  | 2.79E-06 | 0.00E+00 | 0.00E+00 |
| 12h | 1.16E-05  | 2.11E-06 | 7.31E-05 | 7.00E-05 |
| 24h | 1.26E-05  | 4.23E-06 | 5.77E-05 | 4.17E-05 |
| 36h | 7.63E-06  | 1.12E-05 | 2.56E-05 | 1.12E-04 |
| 48h | 3.05E-05  | 3.56E-06 | 3.69E-05 | 7.45E-05 |
| 72h | 5.20E-06  | 4.35E-06 | 2.42E-05 | 4.78E-05 |
|     | cgd5_3630 |          |          |          |
| 2h  | 0.00E+00  | 0.00E+00 | 0.00E+00 | 8.88E-09 |
| 6h  | 2.48E-08  | 2.90E-08 | 9.07E-08 | 1.01E-08 |
| 12h | 4.12E-07  | 5.19E-07 | 3.86E-07 | 9.28E-08 |
| 24h | 3.49E-07  | 2.10E-07 | 1.09E-06 | 6.19E-07 |
| 36h | 9.01E-07  | 5.07E-07 | 1.16E-06 | 1.06E-06 |
| 48h | 1.48E-06  | 4.88E-07 | 2.22E-06 | 4.27E-07 |
| 72h | 4.95E-07  | 2.51E-07 | 5.94E-07 | 5.16E-07 |
|     | cgd5_3640 |          |          |          |
| 2h  | 1.94E-08  | 4.12E-09 | 2.36E-08 | 1.30E-08 |
| 6h  | 8.78E-09  | 7.61E-09 | 8.15E-09 | 1.89E-08 |
| 12h | 6.07E-07  | 1.85E-07 | 1.88E-07 | 3.57E-07 |
| 24h | 3.13E-07  | 1.70E-07 | 1.28E-07 | 2.61E-07 |
| 36h | 1.72E-07  | 2.09E-07 | 7.49E-07 | 4.40E-07 |
| 48h | 1.83E-07  | 5.32E-08 | 2.27E-07 | 2.64E-07 |
| 72h | 1.81E-07  | 6.70E-08 | 1.13E-07 | 7.97E-08 |
|     | cgd5_3650 |          |          |          |
| 2h  | 3.61E-03  | 1.88E-03 | 1.64E-04 | 2.58E-03 |
| 6h  | 1.91E-05  | 1.20E-04 | 1.13E-04 | 1.25E-04 |
| 12h | 3.17E-01  | 2.42E-02 | 7.89E-03 | 8.45E-03 |
| 24h | 2.02E-02  | 8.31E-03 | 1.48E-03 | 8.67E-03 |
| 36h | 9.92E-03  | 3.20E-03 | 6.88E-03 | 2.38E-02 |
| 48h | 5.46E-03  | 1.51E-03 | 4.06E-04 | 8.22E-03 |
| 72h | 3.10E-03  | 1.81E-04 | 1.69E-04 | 9.46E-04 |
|     | cgd5_3700 |          |          |          |
| 2h  | 0.00E+00  | 0.00E+00 | 0.00E+00 | 5.87E-08 |
| 6h  | 2.45E-06  | 2.75E-06 | 5.00E-06 | 7.41E-06 |
| 12h | 4.03E-07  | 9.11E-08 | 6.72E-07 | 3.07E-07 |
| 24h | 8.63E-07  | 3.19E-06 | 1.03E-05 | 6.08E-06 |

|     |           |          |          |          |
|-----|-----------|----------|----------|----------|
| 36h | 3.68E-06  | 2.33E-06 | 6.49E-06 | 1.60E-06 |
| 48h | 1.38E-06  | 2.08E-06 | 3.13E-06 | 3.08E-06 |
| 72h | 5.38E-07  | 3.90E-07 | 9.72E-07 | 1.48E-06 |
|     | cgd5_3730 |          |          |          |
| 2h  | 2.51E-06  | 0.00E+00 | 0.00E+00 | 1.40E-06 |
| 6h  | 5.81E-07  | 4.33E-06 | 7.57E-05 | 6.98E-06 |
| 12h | 0.00E+00  | 1.22E-08 | 6.15E-07 | 1.62E-06 |
| 24h | 9.92E-06  | 1.38E-05 | 4.85E-04 | 3.50E-05 |
| 36h | 1.74E-05  | 7.23E-05 | 2.00E-04 | 4.71E-05 |
| 48h | 2.30E-05  | 2.93E-05 | 6.82E-05 | 2.15E-05 |
| 72h | 9.99E-06  | 1.21E-05 | 1.18E-04 | 4.57E-06 |
|     | cgd5_3740 |          |          |          |
| 2h  | 1.16E-05  | 1.17E-05 | 1.15E-05 | 1.41E-05 |
| 6h  | 4.52E-05  | 3.00E-05 | 2.93E-05 | 2.96E-05 |
| 12h | 4.17E-06  | 1.00E-06 | 1.50E-05 | 8.92E-06 |
| 24h | 8.44E-06  | 1.56E-05 | 8.67E-05 | 8.69E-06 |
| 36h | 1.24E-05  | 9.27E-06 | 1.76E-05 | 8.54E-06 |
| 48h | 4.61E-06  | 4.14E-06 | 6.62E-06 | 2.23E-06 |
| 72h | 2.48E-06  | 1.45E-06 | 6.57E-06 | 1.09E-06 |
|     | cgd5_3750 |          |          |          |
| 2h  | 0.00E+00  | 6.22E-05 | 1.06E-04 | 2.31E-04 |
| 6h  | 8.79E-05  | 2.93E-04 | 7.94E-04 | 6.36E-05 |
| 12h | 1.60E-04  | 2.22E-05 | 1.36E-02 | 8.64E-05 |
| 24h | 1.55E-04  | 1.48E-03 | 6.47E-04 | 3.42E-04 |
| 36h | 4.42E-04  | 5.05E-04 | 9.22E-04 | 7.15E-04 |
| 48h | 6.08E-04  | 4.28E-04 | 1.50E-04 | 5.18E-04 |
| 72h | 7.12E-04  | 1.11E-04 | 3.27E-04 | 1.56E-04 |
|     | cgd5_3780 |          |          |          |
| 2h  | 3.25E-07  | 3.69E-08 | 0.00E+00 | 1.66E-07 |
| 6h  | 3.10E-09  | 1.19E-09 | 0.00E+00 | 2.39E-09 |
| 12h | 1.33E-07  | 2.14E-09 | 8.73E-08 | 4.22E-08 |
| 24h | 4.16E-08  | 8.14E-08 | 2.16E-08 | 2.34E-08 |
| 36h | 5.30E-08  | 2.59E-08 | 3.99E-08 | 9.34E-08 |
| 48h | 4.36E-08  | 2.15E-08 | 1.97E-08 | 1.51E-08 |
| 72h | 3.17E-08  | 8.58E-09 | 5.78E-08 | 3.43E-08 |
|     | cgd5_3790 |          |          |          |
| 2h  | 2.77E-08  | 1.67E-07 | 3.15E-08 | 1.24E-07 |
| 6h  | 3.31E-07  | 2.55E-07 | 1.40E-07 | 1.32E-07 |
| 12h | 1.98E-09  | 1.40E-08 | 1.79E-08 | 3.92E-09 |
| 24h | 5.31E-08  | 8.00E-08 | 2.94E-07 | 6.77E-08 |
| 36h | 2.00E-08  | 1.39E-07 | 4.21E-07 | 7.78E-08 |
| 48h | 1.63E-07  | 3.94E-07 | 4.67E-07 | 9.58E-08 |
| 72h | 8.19E-08  | 1.89E-08 | 2.20E-07 | 1.39E-08 |
|     | cgd5_3810 |          |          |          |
| 2h  | 0.00E+00  | 0.00E+00 | 0.00E+00 | 0.00E+00 |
| 6h  | 0.00E+00  | 0.00E+00 | 0.00E+00 | 0.00E+00 |
| 12h | 0.00E+00  | 0.00E+00 | 0.00E+00 | 0.00E+00 |
| 24h | 7.43E-07  | 1.59E-05 | 3.32E-06 | 1.13E-06 |
| 36h | 6.14E-06  | 1.91E-05 | 1.08E-05 | 1.03E-05 |
| 48h | 4.52E-04  | 5.89E-05 | 9.41E-05 | 1.06E-03 |
| 72h | 3.79E-05  | 2.53E-05 | 1.92E-05 | 3.82E-05 |
|     | cgd5_3850 |          |          |          |
| 2h  | 0.00E+00  | 4.70E-06 | 0.00E+00 | 0.00E+00 |

|           |          |          |          |          |
|-----------|----------|----------|----------|----------|
| 6h        | 1.21E-04 | 7.01E-05 | 1.04E-04 | 6.63E-05 |
| 12h       | 4.39E-06 | 4.09E-06 | 2.74E-05 | 8.30E-06 |
| 24h       | 1.68E-05 | 7.23E-05 | 9.34E-04 | 8.71E-05 |
| 36h       | 1.87E-05 | 6.68E-05 | 2.15E-04 | 4.28E-05 |
| 48h       | 3.62E-05 | 4.04E-05 | 1.52E-04 | 4.10E-05 |
| 72h       | 6.54E-06 | 1.87E-05 | 1.16E-04 | 4.96E-06 |
| cgd5_3870 |          |          |          |          |
| 2h        | 0.00E+00 | 0.00E+00 | 0.00E+00 | 0.00E+00 |
| 6h        | 6.90E-08 | 7.29E-08 | 1.87E-08 | 7.68E-08 |
| 12h       | 4.85E-08 | 0.00E+00 | 0.00E+00 | 3.27E-09 |
| 24h       | 4.97E-08 | 9.78E-08 | 2.27E-07 | 1.87E-07 |
| 36h       | 8.58E-08 | 2.09E-07 | 3.24E-07 | 1.55E-07 |
| 48h       | 3.17E-07 | 3.05E-07 | 5.92E-07 | 5.23E-07 |
| 72h       | 6.82E-08 | 1.74E-07 | 2.08E-07 | 8.72E-08 |
| cgd5_3920 |          |          |          |          |
| 2h        | 0.00E+00 | 0.00E+00 | 0.00E+00 | 0.00E+00 |
| 6h        | 0.00E+00 | 0.00E+00 | 0.00E+00 | 0.00E+00 |
| 12h       | 2.15E-05 | 9.98E-06 | 4.14E-05 | 2.42E-05 |
| 24h       | 4.14E-06 | 4.48E-06 | 4.41E-05 | 5.87E-06 |
| 36h       | 1.91E-06 | 3.75E-06 | 3.53E-05 | 1.75E-05 |
| 48h       | 1.09E-06 | 1.16E-06 | 1.31E-06 | 2.18E-06 |
| 72h       | 2.11E-06 | 1.14E-06 | 4.85E-06 | 3.58E-06 |
| cgd5_3940 |          |          |          |          |
| 2h        | 1.25E-04 | 5.45E-05 | 1.23E-05 | 8.38E-04 |
| 6h        | 2.57E-05 | 5.38E-05 | 2.44E-06 | 4.80E-04 |
| 12h       | 1.37E-04 | 5.25E-05 | 1.69E-05 | 1.69E-04 |
| 24h       | 1.76E-04 | 7.84E-05 | 4.97E-05 | 1.22E-03 |
| 36h       | 7.92E-05 | 5.19E-05 | 3.12E-05 | 1.13E-03 |
| 48h       | 1.51E-04 | 5.55E-05 | 6.98E-05 | 1.40E-04 |
| 72h       | 4.45E-05 | 1.42E-05 | 1.15E-05 | 3.97E-04 |
| cgd5_3950 |          |          |          |          |
| 2h        | 9.00E-06 | 2.68E-06 | 5.68E-07 | 5.25E-06 |
| 6h        | 4.70E-05 | 3.64E-05 | 1.63E-05 | 4.82E-05 |
| 12h       | 4.48E-07 | 1.80E-06 | 2.87E-07 | 1.30E-06 |
| 24h       | 1.00E-05 | 1.11E-05 | 6.41E-06 | 6.91E-05 |
| 36h       | 4.07E-06 | 4.00E-06 | 3.47E-06 | 1.94E-05 |
| 48h       | 4.96E-06 | 2.94E-06 | 7.10E-07 | 1.20E-05 |
| 72h       | 1.09E-06 | 1.13E-06 | 2.27E-07 | 5.89E-06 |
| cgd5_3960 |          |          |          |          |
| 2h        | 1.48E-02 | 2.23E-03 | 6.72E-04 | 1.66E-03 |
| 6h        | 1.03E-04 | 9.04E-05 | 2.83E-05 | 3.50E-04 |
| 12h       | 8.55E-03 | 1.38E-03 | 1.63E-04 | 5.53E-05 |
| 24h       | 2.94E-03 | 1.83E-03 | 3.49E-04 | 5.21E-04 |
| 36h       | 2.61E-04 | 4.02E-04 | 4.04E-04 | 1.02E-04 |
| 48h       | 3.20E-03 | 3.07E-04 | 1.11E-04 | 4.57E-05 |
| 72h       | 2.13E-04 | 6.78E-05 | 4.02E-05 | 1.49E-04 |
| cgd5_3970 |          |          |          |          |
| 2h        | 0.00E+00 | 1.96E-07 | 8.81E-08 | 9.39E-06 |
| 6h        | 0.00E+00 | 1.89E-07 | 2.49E-07 | 1.36E-06 |
| 12h       | 4.66E-05 | 5.65E-05 | 1.19E-05 | 2.59E-05 |
| 24h       | 7.29E-06 | 1.05E-05 | 2.58E-06 | 9.48E-05 |
| 36h       | 5.48E-06 | 9.82E-06 | 6.24E-06 | 2.99E-04 |
| 48h       | 7.05E-06 | 5.99E-06 | 1.38E-06 | 7.96E-05 |

|     |           |          |          |          |
|-----|-----------|----------|----------|----------|
| 72h | 7.94E-06  | 6.95E-06 | 1.53E-05 | 1.04E-05 |
|     | cgd5_3980 |          |          |          |
| 2h  | 0.00E+00  | 0.00E+00 | 0.00E+00 | 0.00E+00 |
| 6h  | 0.00E+00  | 0.00E+00 | 0.00E+00 | 1.44E-09 |
| 12h | 1.23E-08  | 9.56E-09 | 0.00E+00 | 8.74E-11 |
| 24h | 5.50E-09  | 4.56E-10 | 1.29E-09 | 1.40E-09 |
| 36h | 7.64E-08  | 1.38E-07 | 5.08E-09 | 3.96E-08 |
| 48h | 8.37E-07  | 2.27E-07 | 1.62E-07 | 4.80E-07 |
| 72h | 1.06E-07  | 1.99E-07 | 1.08E-07 | 1.44E-07 |
|     | cgd5_3990 |          |          |          |
| 2h  | 0.00E+00  | 4.01E-06 | 1.62E-07 | 5.57E-05 |
| 6h  | 0.00E+00  | 4.17E-08 | 0.00E+00 | 1.57E-06 |
| 12h | 5.95E-05  | 1.01E-04 | 4.97E-06 | 6.86E-06 |
| 24h | 9.81E-06  | 6.97E-06 | 9.79E-07 | 3.55E-05 |
| 36h | 1.03E-05  | 3.48E-06 | 1.24E-05 | 7.22E-05 |
| 48h | 4.28E-05  | 3.55E-06 | 1.15E-06 | 1.01E-04 |
| 72h | 1.67E-06  | 4.59E-06 | 3.27E-06 | 6.41E-05 |
|     | cgd5_4010 |          |          |          |
| 2h  | 0.00E+00  | 0.00E+00 | 0.00E+00 | 0.00E+00 |
| 6h  | 0.00E+00  | 0.00E+00 | 0.00E+00 | 0.00E+00 |
| 12h | 1.03E-05  | 8.41E-05 | 2.78E-06 | 3.88E-06 |
| 24h | 3.33E-04  | 4.86E-05 | 1.80E-04 | 4.40E-05 |
| 36h | 1.50E-05  | 6.39E-04 | 3.99E-04 | 1.05E-04 |
| 48h | 7.09E-05  | 9.19E-04 | 2.90E-04 | 2.98E-05 |
| 72h | 2.76E-04  | 5.83E-04 | 3.50E-04 | 3.59E-05 |
|     | cgd5_4040 |          |          |          |
| 2h  | 0.00E+00  | 0.00E+00 | 0.00E+00 | 0.00E+00 |
| 6h  | 1.18E-07  | 4.94E-08 | 8.48E-08 | 8.54E-09 |
| 12h | 3.52E-07  | 1.07E-07 | 3.97E-07 | 2.98E-07 |
| 24h | 2.21E-07  | 1.61E-07 | 2.84E-07 | 9.97E-07 |
| 36h | 1.26E-05  | 2.33E-06 | 1.46E-06 | 5.98E-06 |
| 48h | 2.83E-06  | 7.96E-07 | 6.16E-07 | 9.12E-06 |
| 72h | 4.38E-06  | 8.20E-07 | 6.31E-07 | 1.33E-06 |
|     | cgd5_4060 |          |          |          |
| 2h  | 5.14E-04  | 6.94E-04 | 4.99E-04 | 2.44E-04 |
| 6h  | 8.50E-04  | 3.72E-04 | 1.06E-04 | 4.06E-04 |
| 12h | 2.75E-04  | 6.52E-06 | 5.70E-05 | 2.34E-05 |
| 24h | 3.70E-04  | 1.69E-04 | 2.30E-04 | 4.97E-04 |
| 36h | 1.31E-04  | 2.14E-04 | 8.33E-04 | 3.85E-04 |
| 48h | 2.28E-03  | 1.11E-04 | 1.26E-04 | 1.05E-05 |
| 72h | 3.49E-04  | 4.24E-05 | 2.56E-05 | 9.10E-05 |
|     | cgd5_4070 |          |          |          |
| 2h  | 0.00E+00  | 2.19E-08 | 1.23E-07 | 5.46E-06 |
| 6h  | 7.36E-07  | 1.64E-06 | 1.44E-06 | 3.85E-06 |
| 12h | 7.45E-07  | 3.10E-07 | 6.90E-08 | 7.83E-07 |
| 24h | 7.53E-07  | 7.74E-07 | 1.89E-06 | 1.34E-05 |
| 36h | 9.74E-05  | 1.65E-06 | 1.01E-06 | 1.10E-05 |
| 48h | 4.08E-06  | 3.00E-06 | 2.25E-06 | 6.10E-06 |
| 72h | 1.39E-06  | 1.19E-06 | 3.00E-07 | 2.46E-06 |
|     | cgd5_4080 |          |          |          |
| 2h  | 0.00E+00  | 0.00E+00 | 0.00E+00 | 3.62E-07 |
| 6h  | 0.00E+00  | 0.00E+00 | 0.00E+00 | 0.00E+00 |
| 12h | 2.99E-07  | 1.65E-06 | 1.89E-07 | 1.09E-07 |

|     |           |          |          |          |
|-----|-----------|----------|----------|----------|
| 24h | 3.91E-07  | 3.65E-07 | 2.93E-07 | 4.21E-07 |
| 36h | 1.21E-06  | 1.72E-06 | 1.96E-06 | 3.13E-06 |
| 48h | 2.48E-06  | 1.59E-06 | 1.11E-06 | 1.62E-06 |
| 72h | 1.46E-06  | 1.99E-07 | 9.22E-07 | 1.04E-06 |
|     | cgd5_4100 |          |          |          |
| 2h  | 2.20E-03  | 1.66E-03 | 3.43E-02 | 6.21E-05 |
| 6h  | 3.32E-03  | 2.02E-03 | 2.11E-04 | 9.62E-05 |
| 12h | 2.20E-03  | 7.79E-04 | 3.09E-03 | 1.65E-05 |
| 24h | 2.41E-03  | 1.99E-03 | 1.85E-03 | 7.99E-05 |
| 36h | 8.33E-04  | 3.03E-03 | 1.04E-02 | 9.73E-05 |
| 48h | 3.13E-03  | 1.55E-03 | 2.85E-03 | 8.28E-05 |
| 72h | 9.99E-04  | 1.92E-03 | 3.91E-03 | 3.83E-06 |
|     | cgd5_4110 |          |          |          |
| 2h  | 7.72E-05  | 4.51E-05 | 0.00E+00 | 1.73E-05 |
| 6h  | 0.00E+00  | 2.94E-05 | 0.00E+00 | 2.80E-05 |
| 12h | 5.62E-02  | 2.04E-04 | 1.62E-03 | 5.32E-04 |
| 24h | 1.14E-02  | 1.02E-03 | 5.08E-04 | 3.56E-04 |
| 36h | 6.26E-03  | 7.87E-04 | 2.61E-04 | 6.63E-03 |
| 48h | 3.17E-03  | 5.23E-04 | 5.74E-04 | 2.14E-04 |
| 72h | 7.31E-04  | 9.12E-05 | 1.28E-04 | 3.81E-04 |
|     | cgd5_4130 |          |          |          |
| 2h  | 0.00E+00  | 0.00E+00 | 4.85E-09 | 4.81E-09 |
| 6h  | 1.25E-09  | 1.03E-08 | 0.00E+00 | 2.20E-09 |
| 12h | 3.48E-07  | 7.45E-08 | 1.48E-07 | 2.53E-07 |
| 24h | 2.99E-07  | 3.32E-07 | 2.52E-07 | 2.59E-07 |
| 36h | 3.32E-08  | 1.01E-07 | 3.94E-07 | 5.40E-07 |
| 48h | 1.07E-07  | 1.73E-07 | 4.71E-07 | 4.00E-07 |
| 72h | 1.42E-07  | 9.81E-08 | 1.56E-07 | 2.71E-07 |
|     | cgd5_4150 |          |          |          |
| 2h  | 0.00E+00  | 0.00E+00 | 0.00E+00 | 0.00E+00 |
| 6h  | 0.00E+00  | 0.00E+00 | 0.00E+00 | 0.00E+00 |
| 12h | 0.00E+00  | 0.00E+00 | 0.00E+00 | 5.70E-10 |
| 24h | 1.46E-09  | 2.35E-08 | 1.61E-08 | 4.27E-09 |
| 36h | 2.78E-08  | 7.78E-08 | 2.47E-08 | 2.87E-08 |
| 48h | 3.58E-07  | 6.74E-07 | 4.11E-07 | 3.62E-07 |
| 72h | 4.18E-07  | 4.03E-07 | 7.26E-07 | 4.45E-07 |
|     | cgd5_4170 |          |          |          |
| 2h  | 1.08E-08  | 0.00E+00 | 0.00E+00 | 2.78E-09 |
| 6h  | 6.40E-08  | 3.97E-07 | 3.75E-07 | 1.69E-07 |
| 12h | 6.12E-06  | 2.52E-06 | 1.46E-06 | 2.68E-06 |
| 24h | 1.29E-06  | 3.92E-06 | 9.41E-06 | 4.81E-06 |
| 36h | 2.75E-06  | 3.84E-06 | 7.91E-06 | 1.05E-05 |
| 48h | 1.03E-06  | 7.05E-07 | 1.68E-06 | 1.44E-06 |
| 72h | 1.06E-06  | 1.48E-06 | 2.48E-06 | 8.85E-07 |
|     | cgd5_4210 |          |          |          |
| 2h  | 2.17E-07  | 0.00E+00 | 0.00E+00 | 0.00E+00 |
| 6h  | 2.60E-07  | 7.23E-07 | 1.93E-05 | 3.52E-05 |
| 12h | 5.83E-07  | 1.00E-06 | 1.78E-06 | 5.83E-06 |
| 24h | 2.12E-06  | 6.80E-06 | 6.77E-05 | 5.97E-05 |
| 36h | 2.40E-06  | 4.87E-05 | 3.25E-05 | 6.43E-05 |
| 48h | 2.84E-06  | 2.11E-05 | 5.29E-05 | 4.04E-05 |
| 72h | 4.74E-06  | 1.34E-05 | 7.01E-05 | 2.68E-05 |
|     | cgd5_4220 |          |          |          |

|           |          |          |          |          |
|-----------|----------|----------|----------|----------|
| 2h        | 0.00E+00 | 0.00E+00 | 0.00E+00 | 0.00E+00 |
| 6h        | 0.00E+00 | 0.00E+00 | 0.00E+00 | 0.00E+00 |
| 12h       | 7.37E-07 | 2.54E-08 | 4.05E-08 | 6.57E-08 |
| 24h       | 2.88E-08 | 1.34E-07 | 3.68E-08 | 1.96E-08 |
| 36h       | 1.47E-08 | 6.51E-08 | 1.26E-07 | 3.30E-07 |
| 48h       | 1.78E-08 | 1.28E-08 | 7.62E-08 | 1.71E-07 |
| 72h       | 2.49E-08 | 3.47E-08 | 2.70E-08 | 4.49E-08 |
| cgd5_4230 |          |          |          |          |
| 2h        | 0.00E+00 | 0.00E+00 | 0.00E+00 | 0.00E+00 |
| 6h        | 0.00E+00 | 6.99E-08 | 5.15E-09 | 2.75E-07 |
| 12h       | 9.42E-06 | 2.35E-06 | 6.29E-06 | 9.70E-06 |
| 24h       | 6.42E-07 | 2.55E-05 | 7.46E-06 | 6.11E-06 |
| 36h       | 4.21E-06 | 2.15E-05 | 2.79E-05 | 6.16E-05 |
| 48h       | 5.47E-06 | 3.20E-05 | 8.13E-05 | 3.06E-05 |
| 72h       | 1.53E-05 | 3.44E-05 | 4.90E-05 | 5.74E-05 |
| cgd5_4240 |          |          |          |          |
| 2h        | 0.00E+00 | 0.00E+00 | 0.00E+00 | 0.00E+00 |
| 6h        | 0.00E+00 | 0.00E+00 | 1.41E-08 | 7.15E-09 |
| 12h       | 1.12E-05 | 6.15E-06 | 1.64E-06 | 5.07E-06 |
| 24h       | 6.47E-07 | 4.14E-06 | 4.17E-06 | 3.08E-06 |
| 36h       | 3.90E-06 | 7.27E-06 | 3.98E-05 | 4.01E-05 |
| 48h       | 1.20E-06 | 2.69E-06 | 6.86E-06 | 8.51E-06 |
| 72h       | 2.13E-06 | 3.17E-06 | 7.37E-06 | 2.98E-06 |
| cgd5_4250 |          |          |          |          |
| 2h        | 1.71E-07 | 0.00E+00 | 0.00E+00 | 0.00E+00 |
| 6h        | 9.54E-07 | 8.36E-06 | 7.80E-06 | 6.31E-06 |
| 12h       | 9.28E-07 | 9.37E-07 | 8.34E-07 | 8.66E-07 |
| 24h       | 4.03E-07 | 6.87E-06 | 1.88E-05 | 4.21E-05 |
| 36h       | 1.96E-06 | 3.29E-05 | 1.38E-05 | 2.98E-05 |
| 48h       | 3.15E-06 | 9.30E-06 | 2.11E-05 | 1.85E-05 |
| 72h       | 2.47E-06 | 8.49E-06 | 7.42E-06 | 7.91E-06 |
| cgd5_4260 |          |          |          |          |
| 2h        | 4.30E-04 | 3.02E-04 | 1.96E-04 | 5.53E-04 |
| 6h        | 2.13E-05 | 3.61E-04 | 4.91E-04 | 2.73E-04 |
| 12h       | 2.13E-04 | 1.09E-04 | 1.50E-04 | 9.12E-05 |
| 24h       | 2.62E-04 | 1.82E-03 | 8.31E-04 | 9.81E-04 |
| 36h       | 6.32E-05 | 4.39E-04 | 2.02E-04 | 1.53E-03 |
| 48h       | 8.24E-05 | 5.33E-04 | 1.10E-04 | 1.62E-04 |
| 72h       | 1.75E-05 | 8.67E-05 | 1.18E-04 | 8.98E-05 |
| cgd5_4280 |          |          |          |          |
| 2h        | 0.00E+00 | 0.00E+00 | 0.00E+00 | 0.00E+00 |
| 6h        | 3.44E-09 | 3.24E-08 | 6.12E-08 | 2.77E-09 |
| 12h       | 1.18E-08 | 2.80E-09 | 3.00E-09 | 7.87E-09 |
| 24h       | 5.38E-08 | 3.54E-08 | 2.76E-07 | 3.43E-07 |
| 36h       | 2.16E-07 | 1.79E-07 | 5.84E-08 | 1.62E-07 |
| 48h       | 3.60E-07 | 9.60E-08 | 1.83E-07 | 2.17E-07 |
| 72h       | 7.10E-08 | 9.68E-08 | 3.43E-08 | 1.13E-07 |
| cgd5_4290 |          |          |          |          |
| 2h        | 4.69E-04 | 1.47E-04 | 3.56E-04 | 0.00E+00 |
| 6h        | 1.90E-05 | 1.10E-04 | 6.96E-04 | 0.00E+00 |
| 12h       | 5.01E-06 | 3.75E-05 | 7.58E-05 | 2.23E-04 |
| 24h       | 9.55E-05 | 5.02E-04 | 4.23E-05 | 1.80E-03 |
| 36h       | 2.83E-05 | 1.36E-04 | 7.82E-05 | 1.19E-04 |



|     |           |          |          |          |
|-----|-----------|----------|----------|----------|
| 48h | 4.21E-05  | 3.14E-04 | 1.46E-04 | 1.05E-04 |
| 72h | 2.24E-05  | 7.29E-06 | 8.53E-05 | 5.80E-05 |
|     | cgd5_4300 |          |          |          |
| 2h  | 2.08E-07  | 9.62E-08 | 7.37E-09 | 7.61E-08 |
| 6h  | 0.00E+00  | 0.00E+00 | 2.79E-09 | 7.79E-09 |
| 12h | 3.18E-08  | 4.09E-08 | 3.01E-07 | 6.68E-08 |
| 24h | 7.98E-08  | 2.73E-08 | 7.49E-08 | 5.94E-08 |
| 36h | 2.45E-07  | 2.19E-07 | 4.85E-07 | 6.44E-08 |
| 48h | 7.06E-07  | 1.32E-07 | 7.25E-07 | 5.41E-07 |
| 72h | 5.66E-07  | 9.52E-07 | 1.11E-06 | 3.38E-07 |
|     | cgd5_4320 |          |          |          |
| 2h  | 5.65E-07  | 7.22E-07 | 7.95E-08 | 8.73E-07 |
| 6h  | 1.72E-06  | 8.62E-07 | 6.72E-07 | 2.89E-06 |
| 12h | 2.94E-08  | 9.35E-08 | 4.06E-07 | 9.60E-08 |
| 24h | 6.63E-07  | 2.28E-07 | 9.74E-07 | 1.56E-06 |
| 36h | 3.73E-07  | 2.61E-07 | 2.96E-07 | 2.01E-07 |
| 48h | 4.17E-07  | 3.60E-07 | 7.14E-07 | 9.86E-07 |
| 72h | 3.39E-07  | 6.72E-07 | 7.74E-07 | 4.04E-07 |
|     | cgd5_4330 |          |          |          |
| 2h  | 5.45E-05  | 5.01E-05 | 9.39E-05 | 7.42E-05 |
| 6h  | 4.66E-05  | 4.86E-05 | 1.85E-04 | 4.45E-05 |
| 12h | 7.78E-06  | 3.39E-06 | 3.02E-04 | 4.78E-06 |
| 24h | 1.56E-05  | 1.74E-05 | 1.48E-04 | 2.67E-05 |
| 36h | 8.45E-06  | 4.80E-06 | 1.58E-04 | 9.09E-06 |
| 48h | 6.30E-06  | 5.03E-06 | 1.97E-04 | 1.27E-05 |
| 72h | 6.04E-06  | 5.65E-06 | 9.78E-05 | 5.97E-06 |
|     | cgd5_4350 |          |          |          |
| 2h  | 3.68E-06  | 2.66E-06 | 0.00E+00 | 2.76E-06 |
| 6h  | 1.24E-06  | 1.51E-06 | 2.88E-06 | 9.78E-07 |
| 12h | 9.94E-09  | 2.29E-07 | 2.57E-05 | 1.39E-06 |
| 24h | 8.05E-07  | 4.89E-07 | 3.94E-06 | 1.03E-06 |
| 36h | 1.11E-06  | 5.02E-07 | 9.66E-06 | 1.13E-06 |
| 48h | 3.12E-07  | 5.74E-07 | 2.51E-06 | 2.20E-07 |
| 72h | 4.04E-07  | 7.66E-07 | 2.76E-06 | 6.93E-07 |
|     | cgd5_4360 |          |          |          |
| 2h  | 5.58E-05  | 6.15E-05 | 7.33E-05 | 8.56E-05 |
| 6h  | 3.27E-05  | 3.81E-05 | 1.72E-04 | 4.22E-05 |
| 12h | 3.38E-05  | 4.37E-05 | 1.77E-04 | 2.74E-05 |
| 24h | 1.86E-05  | 1.64E-05 | 1.12E-04 | 2.26E-05 |
| 36h | 2.50E-05  | 1.59E-05 | 2.20E-04 | 3.22E-05 |
| 48h | 6.52E-06  | 7.44E-06 | 7.90E-05 | 9.48E-06 |
| 72h | 2.14E-03  | 3.26E-06 | 1.77E-05 | 5.27E-06 |
|     | cgd5_4370 |          |          |          |
| 2h  | 1.48E-07  | 2.07E-07 | 1.37E-08 | 3.57E-08 |
| 6h  | 1.68E-06  | 2.10E-06 | 6.38E-07 | 1.05E-06 |
| 12h | 1.15E-06  | 1.51E-06 | 7.14E-07 | 3.19E-07 |
| 24h | 4.94E-07  | 5.88E-07 | 8.39E-07 | 1.23E-06 |
| 36h | 3.47E-06  | 6.61E-07 | 4.34E-06 | 4.45E-06 |
| 48h | 1.35E-06  | 1.23E-06 | 5.52E-07 | 5.45E-07 |
| 72h | 2.54E-07  | 2.12E-07 | 8.39E-08 | 5.13E-07 |
|     | cgd5_4400 |          |          |          |
| 2h  | 1.49E-06  | 2.32E-06 | 4.21E-08 | 1.83E-06 |
| 6h  | 1.37E-06  | 9.51E-07 | 3.18E-07 | 5.86E-07 |

|     |           |          |          |          |
|-----|-----------|----------|----------|----------|
| 12h | 5.70E-07  | 3.30E-07 | 6.09E-07 | 3.04E-07 |
| 24h | 2.73E-07  | 4.58E-07 | 1.86E-07 | 2.83E-07 |
| 36h | 7.05E-07  | 1.84E-07 | 2.87E-06 | 4.47E-07 |
| 48h | 3.03E-07  | 6.09E-07 | 1.99E-07 | 1.87E-07 |
| 72h | 2.30E-07  | 1.28E-07 | 1.69E-07 | 2.94E-07 |
|     | cgd5_4420 |          |          |          |
| 2h  | 9.49E-05  | 2.87E-04 | 9.42E-05 | 4.65E-04 |
| 6h  | 1.56E-04  | 3.57E-04 | 1.68E-05 | 1.80E-04 |
| 12h | 4.45E-05  | 1.27E-05 | 6.45E-05 | 2.82E-04 |
| 24h | 4.10E-04  | 1.82E-04 | 6.93E-06 | 6.40E-04 |
| 36h | 2.03E-04  | 5.66E-05 | 4.52E-05 | 1.62E-04 |
| 48h | 2.51E-04  | 1.12E-04 | 1.45E-05 | 8.05E-04 |
| 72h | 9.19E-05  | 6.33E-05 | 2.74E-05 | 1.04E-04 |
|     | cgd5_4430 |          |          |          |
| 2h  | 3.13E-02  | 1.02E-02 | 1.20E-04 | 1.94E-02 |
| 6h  | 1.20E-02  | 4.96E-03 | 8.34E-05 | 1.81E-02 |
| 12h | 1.25E-02  | 3.92E-03 | 7.83E-04 | 9.77E-03 |
| 24h | 9.19E-03  | 6.70E-03 | 1.96E-04 | 2.11E-03 |
| 36h | 3.82E-03  | 2.35E-03 | 1.21E-04 | 6.35E-03 |
| 48h | 4.62E-03  | 2.25E-03 | 1.63E-04 | 6.84E-03 |
| 72h | 2.81E-03  | 1.92E-03 | 4.61E-05 | 2.71E-03 |
|     | cgd5_4440 |          |          |          |
| 2h  | 2.96E-07  | 3.75E-07 | 2.91E-06 | 7.62E-07 |
| 6h  | 5.69E-07  | 5.72E-07 | 6.75E-06 | 1.10E-06 |
| 12h | 2.42E-06  | 4.11E-07 | 1.05E-05 | 1.11E-06 |
| 24h | 1.72E-06  | 1.19E-06 | 1.13E-05 | 3.41E-06 |
| 36h | 3.02E-06  | 9.17E-07 | 4.33E-05 | 5.47E-06 |
| 48h | 5.24E-06  | 1.92E-06 | 1.87E-05 | 4.86E-06 |
| 72h | 1.21E-05  | 2.53E-06 | 1.50E-05 | 1.69E-06 |
|     | cgd5_4470 |          |          |          |
| 2h  | 0.00E+00  | 0.00E+00 | 0.00E+00 | 0.00E+00 |
| 6h  | 4.98E-06  | 2.96E-05 | 2.02E-05 | 7.54E-07 |
| 12h | 3.78E-06  | 6.94E-06 | 3.72E-05 | 6.74E-06 |
| 24h | 8.39E-06  | 1.51E-05 | 7.58E-05 | 4.38E-05 |
| 36h | 4.98E-05  | 8.18E-06 | 1.61E-04 | 8.27E-05 |
| 48h | 2.23E-05  | 3.02E-05 | 4.16E-05 | 6.13E-05 |
| 72h | 7.15E-06  | 4.33E-06 | 2.29E-05 | 6.82E-06 |
|     | cgd5_4480 |          |          |          |
| 2h  | 2.03E-08  | 0.00E+00 | 0.00E+00 | 0.00E+00 |
| 6h  | 2.15E-06  | 6.66E-06 | 1.12E-05 | 5.11E-06 |
| 12h | 8.19E-07  | 4.75E-07 | 6.08E-06 | 2.18E-06 |
| 24h | 7.86E-07  | 7.16E-07 | 4.40E-05 | 2.06E-05 |
| 36h | 1.69E-06  | 1.06E-06 | 4.68E-05 | 5.40E-06 |
| 48h | 2.73E-06  | 3.00E-06 | 3.57E-05 | 1.04E-05 |
| 72h | 5.42E-07  | 1.93E-06 | 7.09E-06 | 7.08E-07 |
|     | cgd1_950  |          |          |          |
| 2h  | 1.32E-08  | 0.00E+00 | 0.00E+00 | 3.39E-09 |
| 6h  | 0.00E+00  | 0.00E+00 | 0.00E+00 | 3.51E-09 |
| 12h | 1.29E-05  | 1.43E-05 | 1.98E-06 | 3.46E-06 |
| 24h | 5.74E-06  | 2.03E-06 | 3.16E-06 | 1.47E-06 |
| 36h | 1.68E-06  | 6.17E-07 | 1.56E-05 | 3.59E-06 |
| 48h | 1.47E-06  | 2.38E-07 | 1.51E-06 | 1.71E-06 |
| 72h | 1.82E-07  | 1.40E-07 | 6.15E-07 | 1.89E-07 |

|     |           |          |          |          |
|-----|-----------|----------|----------|----------|
|     | cgd1_960  |          |          |          |
| 2h  | 0.00E+00  | 1.31E-09 | 0.00E+00 | 0.00E+00 |
| 6h  | 0.00E+00  | 0.00E+00 | 1.21E-08 | 2.89E-09 |
| 12h | 6.36E-08  | 2.91E-07 | 2.74E-09 | 1.36E-08 |
| 24h | 1.92E-07  | 1.05E-07 | 1.28E-07 | 1.23E-07 |
| 36h | 1.96E-07  | 2.54E-07 | 5.15E-07 | 1.87E-07 |
| 48h | 4.56E-07  | 1.45E-07 | 4.06E-07 | 4.45E-07 |
| 72h | 1.03E-07  | 1.43E-07 | 1.35E-07 | 1.79E-07 |
|     | cgd1_970  |          |          |          |
| 2h  | 0.00E+00  | 9.42E-09 | 0.00E+00 | 0.00E+00 |
| 6h  | 0.00E+00  | 0.00E+00 | 0.00E+00 | 0.00E+00 |
| 12h | 2.36E-06  | 4.84E-06 | 4.40E-07 | 8.99E-07 |
| 24h | 2.71E-06  | 6.77E-07 | 1.95E-06 | 9.70E-07 |
| 36h | 5.92E-07  | 8.33E-07 | 4.41E-06 | 2.31E-06 |
| 48h | 1.03E-06  | 3.85E-07 | 9.59E-07 | 3.67E-07 |
| 72h | 1.40E-06  | 1.24E-06 | 2.43E-06 | 1.35E-06 |
|     | cgd1_980  |          |          |          |
| 2h  | 1.09E-03  | 3.42E-04 | 1.20E-03 | 5.75E-04 |
| 6h  | 3.27E-04  | 1.27E-04 | 3.42E-03 | 8.62E-04 |
| 12h | 3.74E-04  | 1.47E-04 | 3.24E-04 | 2.61E-04 |
| 24h | 2.90E-04  | 1.09E-04 | 1.92E-03 | 6.43E-04 |
| 36h | 2.18E-04  | 1.21E-04 | 1.54E-03 | 2.55E-04 |
| 48h | 4.60E-04  | 1.04E-04 | 1.72E-03 | 3.49E-04 |
| 72h | 1.27E-03  | 5.75E-04 | 3.35E-03 | 1.23E-03 |
|     | cgd1_990  |          |          |          |
| 2h  | 3.97E-09  | 0.00E+00 | 0.00E+00 | 0.00E+00 |
| 6h  | 0.00E+00  | 0.00E+00 | 8.43E-09 | 1.94E-08 |
| 12h | 4.93E-08  | 4.16E-08 | 1.45E-09 | 3.33E-08 |
| 24h | 2.96E-08  | 1.96E-08 | 8.36E-08 | 3.71E-08 |
| 36h | 1.51E-07  | 2.44E-07 | 1.62E-07 | 2.22E-07 |
| 48h | 4.49E-06  | 1.45E-06 | 3.78E-06 | 1.73E-06 |
| 72h | 1.35E-05  | 8.98E-06 | 1.22E-05 | 1.47E-05 |
|     | cgd1_1000 |          |          |          |
| 2h  | 0.00E+00  | 0.00E+00 | 0.00E+00 | 2.31E-06 |
| 6h  | 7.64E-05  | 0.00E+00 | 1.05E-05 | 1.35E-04 |
| 12h | 7.84E-04  | 2.12E-04 | 1.08E-06 | 5.72E-04 |
| 24h | 8.73E-05  | 4.88E-05 | 1.35E-05 | 2.54E-04 |
| 36h | 2.71E-04  | 2.22E-04 | 3.18E-05 | 1.30E-03 |
| 48h | 9.23E-04  | 3.66E-04 | 2.46E-05 | 3.16E-04 |
| 72h | 1.76E-03  | 1.18E-03 | 1.20E-04 | 2.10E-03 |
|     | cgd1_1010 |          |          |          |
| 2h  | 0.00E+00  | 0.00E+00 | 0.00E+00 | 0.00E+00 |
| 6h  | 0.00E+00  | 0.00E+00 | 0.00E+00 | 0.00E+00 |
| 12h | 1.52E-05  | 2.09E-06 | 5.25E-06 | 1.87E-05 |
| 24h | 5.32E-06  | 2.27E-06 | 2.54E-05 | 2.14E-06 |
| 36h | 1.09E-05  | 7.83E-06 | 2.61E-04 | 3.96E-05 |
| 48h | 3.24E-06  | 5.25E-06 | 1.66E-04 | 7.53E-06 |
| 72h | 1.50E-05  | 2.09E-06 | 1.30E-05 | 3.41E-06 |
|     | cgd1_1020 |          |          |          |
| 2h  | 2.26E-06  | 4.52E-06 | 1.79E-04 | 0.00E+00 |
| 6h  | 1.58E-04  | 2.64E-05 | 3.71E-04 | 5.30E-04 |
| 12h | 3.19E-07  | 2.26E-06 | 4.04E-07 | 2.94E-05 |
| 24h | 9.58E-05  | 1.29E-05 | 1.23E-04 | 3.03E-04 |

|     |           |          |          |          |
|-----|-----------|----------|----------|----------|
| 36h | 2.76E-04  | 3.99E-05 | 6.20E-05 | 1.85E-04 |
| 48h | 1.94E-04  | 4.19E-05 | 2.32E-05 | 2.30E-04 |
| 72h | 1.49E-04  | 4.60E-05 | 1.36E-04 | 3.78E-05 |
|     | cgd1_1030 |          |          |          |
| 2h  | 4.46E-08  | 1.42E-08 | 0.00E+00 | 0.00E+00 |
| 6h  | 1.13E-07  | 7.81E-08 | 3.37E-07 | 2.14E-07 |
| 12h | 1.36E-08  | 0.00E+00 | 1.96E-10 | 9.67E-09 |
| 24h | 2.48E-08  | 3.16E-08 | 3.01E-07 | 1.33E-07 |
| 36h | 1.76E-07  | 1.03E-07 | 1.62E-07 | 3.44E-07 |
| 48h | 9.48E-08  | 1.22E-07 | 1.08E-07 | 1.07E-07 |
| 72h | 1.41E-07  | 1.70E-08 | 9.06E-08 | 2.78E-08 |
|     | cgd1_1050 |          |          |          |
| 2h  | 4.57E-06  | 4.81E-06 | 6.27E-05 | 4.81E-06 |
| 6h  | 4.36E-06  | 3.09E-06 | 1.84E-05 | 5.51E-06 |
| 12h | 3.36E-06  | 9.35E-07 | 1.35E-06 | 2.86E-06 |
| 24h | 2.82E-06  | 3.13E-06 | 2.07E-05 | 5.39E-06 |
| 36h | 5.06E-06  | 1.01E-06 | 3.66E-05 | 5.10E-06 |
| 48h | 3.67E-06  | 2.04E-06 | 8.35E-06 | 4.25E-06 |
| 72h | 1.34E-06  | 8.47E-08 | 2.24E-06 | 3.79E-07 |
|     | cgd1_1060 |          |          |          |
| 2h  | 4.91E-04  | 1.28E-04 | 1.00E-03 | 2.35E-04 |
| 6h  | 1.57E-04  | 1.69E-04 | 1.78E-03 | 1.38E-03 |
| 12h | 8.03E-05  | 2.33E-06 | 1.30E-04 | 7.19E-05 |
| 24h | 1.63E-04  | 6.48E-05 | 1.56E-03 | 4.84E-04 |
| 36h | 1.42E-04  | 3.87E-05 | 4.33E-04 | 1.27E-04 |
| 48h | 2.51E-04  | 2.06E-05 | 5.68E-04 | 8.16E-05 |
| 72h | 1.84E-05  | 3.74E-06 | 9.51E-05 | 6.62E-06 |
|     | cgd1_1080 |          |          |          |
| 2h  | 0.00E+00  | 4.99E-07 | 0.00E+00 | 0.00E+00 |
| 6h  | 1.11E-07  | 1.65E-08 | 1.01E-04 | 0.00E+00 |
| 12h | 2.44E-04  | 6.89E-05 | 3.30E-05 | 7.12E-05 |
| 24h | 1.15E-04  | 2.11E-05 | 8.07E-05 | 1.44E-04 |
| 36h | 2.48E-04  | 4.04E-05 | 2.01E-04 | 2.48E-04 |
| 48h | 1.83E-04  | 3.54E-05 | 1.08E-04 | 1.19E-04 |
| 72h | 3.85E-05  | 2.38E-05 | 4.56E-05 | 6.81E-05 |
|     | cgd1_1090 |          |          |          |
| 2h  | 2.05E-09  | 0.00E+00 | 0.00E+00 | 0.00E+00 |
| 6h  | 0.00E+00  | 0.00E+00 | 0.00E+00 | 0.00E+00 |
| 12h | 7.37E-07  | 4.09E-06 | 3.23E-07 | 2.48E-08 |
| 24h | 2.98E-07  | 5.31E-07 | 2.78E-07 | 2.66E-07 |
| 36h | 1.57E-07  | 8.57E-08 | 5.19E-06 | 1.71E-06 |
| 48h | 4.71E-08  | 1.94E-07 | 2.29E-07 | 2.63E-07 |
| 72h | 4.08E-08  | 2.93E-08 | 8.02E-08 | 4.36E-08 |
|     | cgd1_1100 |          |          |          |
| 2h  | 0.00E+00  | 0.00E+00 | 0.00E+00 | 0.00E+00 |
| 6h  | 0.00E+00  | 0.00E+00 | 0.00E+00 | 0.00E+00 |
| 12h | 1.07E-09  | 4.45E-09 | 0.00E+00 | 4.52E-11 |
| 24h | 2.13E-08  | 1.88E-08 | 6.20E-09 | 3.10E-08 |
| 36h | 5.02E-08  | 1.24E-08 | 1.79E-07 | 6.09E-08 |
| 48h | 1.59E-06  | 1.42E-06 | 1.53E-05 | 8.50E-06 |
| 72h | 2.64E-06  | 2.44E-06 | 3.58E-06 | 5.29E-06 |
|     | cgd1_1110 |          |          |          |
| 2h  | 8.13E-08  | 5.16E-08 | 0.00E+00 | 1.04E-09 |

|           |          |          |          |          |
|-----------|----------|----------|----------|----------|
| 6h        | 9.16E-07 | 1.59E-06 | 4.67E-07 | 4.05E-07 |
| 12h       | 8.67E-08 | 3.43E-07 | 1.37E-07 | 1.96E-08 |
| 24h       | 2.23E-07 | 2.87E-07 | 2.40E-06 | 1.03E-06 |
| 36h       | 7.40E-07 | 3.95E-07 | 1.67E-06 | 7.51E-07 |
| 48h       | 8.69E-07 | 8.66E-07 | 5.04E-06 | 2.64E-06 |
| 72h       | 1.88E-06 | 9.80E-07 | 2.18E-06 | 1.63E-06 |
| cgd1_1120 |          |          |          |          |
| 2h        | 0.00E+00 | 0.00E+00 | 0.00E+00 | 0.00E+00 |
| 6h        | 5.18E-06 | 7.07E-06 | 1.49E-04 | 7.55E-05 |
| 12h       | 1.26E-05 | 5.40E-05 | 2.40E-04 | 1.41E-05 |
| 24h       | 3.21E-06 | 7.66E-06 | 6.78E-04 | 2.48E-04 |
| 36h       | 2.94E-05 | 2.36E-05 | 1.40E-03 | 4.34E-04 |
| 48h       | 4.67E-06 | 4.23E-06 | 3.95E-04 | 2.83E-04 |
| 72h       | 1.29E-05 | 1.62E-05 | 1.18E-04 | 2.00E-04 |
| cgd1_1130 |          |          |          |          |
| 2h        | 0.00E+00 | 0.00E+00 | 0.00E+00 | 0.00E+00 |
| 6h        | 0.00E+00 | 0.00E+00 | 0.00E+00 | 2.56E-08 |
| 12h       | 4.72E-09 | 5.59E-09 | 2.17E-09 | 1.46E-10 |
| 24h       | 1.31E-08 | 3.64E-08 | 1.67E-08 | 4.55E-08 |
| 36h       | 1.13E-07 | 5.67E-08 | 2.75E-07 | 1.66E-07 |
| 48h       | 4.21E-08 | 1.41E-08 | 1.08E-07 | 6.39E-08 |
| 72h       | 9.32E-08 | 1.80E-07 | 2.32E-07 | 1.86E-07 |
| cgd1_1140 |          |          |          |          |
| 2h        | 0.00E+00 | 1.74E-08 | 2.28E-08 | 6.94E-09 |
| 6h        | 1.31E-06 | 1.92E-06 | 1.37E-06 | 1.56E-06 |
| 12h       | 2.80E-07 | 5.40E-07 | 1.68E-07 | 3.75E-09 |
| 24h       | 2.94E-07 | 2.29E-07 | 3.04E-06 | 2.35E-06 |
| 36h       | 1.25E-06 | 7.65E-07 | 2.25E-06 | 1.24E-06 |
| 48h       | 4.49E-06 | 3.29E-06 | 8.12E-06 | 5.37E-06 |
| 72h       | 1.25E-06 | 2.14E-06 | 2.25E-06 | 2.23E-06 |
| cgd1_1150 |          |          |          |          |
| 2h        | 2.77E-08 | 0.00E+00 | 2.43E-08 | 4.17E-09 |
| 6h        | 3.14E-08 | 0.00E+00 | 0.00E+00 | 7.04E-09 |
| 12h       | 5.46E-09 | 1.40E-07 | 1.86E-09 | 2.68E-09 |
| 24h       | 4.85E-08 | 5.59E-08 | 8.33E-08 | 6.70E-08 |
| 36h       | 1.01E-06 | 5.58E-07 | 9.44E-07 | 7.69E-07 |
| 48h       | 6.35E-06 | 3.48E-06 | 8.81E-06 | 4.21E-06 |
| 72h       | 2.11E-06 | 2.30E-06 | 1.41E-06 | 1.39E-06 |
| cgd1_1160 |          |          |          |          |
| 2h        | 0.00E+00 | 0.00E+00 | 0.00E+00 | 0.00E+00 |
| 6h        | 0.00E+00 | 1.62E-07 | 0.00E+00 | 0.00E+00 |
| 12h       | 0.00E+00 | 0.00E+00 | 5.30E-05 | 3.86E-07 |
| 24h       | 4.24E-08 | 2.33E-06 | 2.19E-05 | 3.17E-05 |
| 36h       | 9.11E-06 | 3.08E-06 | 1.31E-04 | 5.70E-05 |
| 48h       | 8.46E-05 | 7.70E-05 | 2.71E-04 | 3.09E-04 |
| 72h       | 1.44E-04 | 4.55E-04 | 9.73E-04 | 7.91E-04 |
| cgd1_1170 |          |          |          |          |
| 2h        | 0.00E+00 | 0.00E+00 | 0.00E+00 | 0.00E+00 |
| 6h        | 4.68E-07 | 0.00E+00 | 7.45E-10 | 5.13E-07 |
| 12h       | 6.66E-08 | 3.54E-07 | 7.97E-09 | 6.73E-09 |
| 24h       | 3.37E-08 | 7.45E-08 | 1.08E-07 | 3.04E-07 |
| 36h       | 1.38E-07 | 3.58E-07 | 8.80E-07 | 1.18E-06 |
| 48h       | 9.33E-07 | 8.07E-07 | 1.60E-06 | 1.60E-06 |

|     |           |          |          |          |
|-----|-----------|----------|----------|----------|
| 72h | 1.24E-06  | 3.20E-06 | 8.98E-06 | 5.85E-06 |
|     | cgd1_1180 |          |          |          |
| 2h  | 0.00E+00  | 1.07E-08 | 7.66E-09 | 0.00E+00 |
| 6h  | 0.00E+00  | 1.26E-08 | 0.00E+00 | 0.00E+00 |
| 12h | 2.08E-07  | 2.15E-06 | 6.04E-08 | 3.76E-08 |
| 24h | 1.91E-07  | 2.82E-07 | 3.72E-08 | 2.17E-07 |
| 36h | 2.19E-07  | 2.45E-07 | 1.32E-06 | 7.89E-07 |
| 48h | 5.34E-07  | 7.46E-07 | 2.60E-06 | 2.74E-06 |
| 72h | 9.07E-07  | 2.10E-06 | 7.12E-06 | 2.82E-06 |
|     | cgd1_1190 |          |          |          |
| 2h  | 0.00E+00  | 0.00E+00 | 0.00E+00 | 5.05E-06 |
| 6h  | 0.00E+00  | 1.79E-07 | 0.00E+00 | 1.64E-06 |
| 12h | 1.62E-05  | 2.14E-04 | 3.42E-04 | 2.21E-05 |
| 24h | 7.01E-06  | 2.46E-05 | 1.57E-04 | 8.82E-05 |
| 36h | 5.16E-06  | 9.61E-06 | 4.84E-04 | 3.36E-04 |
| 48h | 8.41E-06  | 6.95E-06 | 3.16E-04 | 2.15E-04 |
| 72h | 5.08E-06  | 1.07E-05 | 7.32E-04 | 1.85E-04 |
|     | cgd1_1210 |          |          |          |
| 2h  | 2.08E-05  | 3.40E-06 | 2.09E-03 | 5.57E-04 |
| 6h  | 4.88E-07  | 1.87E-07 | 3.89E-05 | 8.69E-06 |
| 12h | 1.35E-04  | 5.36E-04 | 3.63E-03 | 2.42E-04 |
| 24h | 9.14E-05  | 1.45E-04 | 4.48E-04 | 2.85E-04 |
| 36h | 2.23E-05  | 3.40E-05 | 3.84E-03 | 1.32E-03 |
| 48h | 5.65E-06  | 1.77E-05 | 2.32E-04 | 2.16E-04 |
| 72h | 1.76E-04  | 6.07E-05 | 7.19E-04 | 4.42E-04 |
|     | cgd1_1220 |          |          |          |
| 2h  | 3.82E-07  | 2.00E-09 | 0.00E+00 | 1.45E-07 |
| 6h  | 3.57E-08  | 1.60E-08 | 1.92E-07 | 3.20E-07 |
| 12h | 2.17E-05  | 1.18E-05 | 4.71E-06 | 4.34E-06 |
| 24h | 6.48E-06  | 3.48E-06 | 2.96E-06 | 1.31E-06 |
| 36h | 1.66E-06  | 1.93E-06 | 4.68E-06 | 3.93E-06 |
| 48h | 1.99E-06  | 9.23E-07 | 1.75E-06 | 1.08E-06 |
| 72h | 9.06E-07  | 6.29E-07 | 2.72E-06 | 1.30E-06 |
|     | cgd1_1230 |          |          |          |
| 2h  | 0.00E+00  | 0.00E+00 | 0.00E+00 | 0.00E+00 |
| 6h  | 0.00E+00  | 0.00E+00 | 0.00E+00 | 0.00E+00 |
| 12h | 1.42E-05  | 7.90E-06 | 2.22E-05 | 2.49E-06 |
| 24h | 3.51E-06  | 1.88E-05 | 9.78E-05 | 2.01E-06 |
| 36h | 2.49E-06  | 2.23E-05 | 2.14E-05 | 3.94E-06 |
| 48h | 1.17E-06  | 9.55E-06 | 2.40E-05 | 1.58E-06 |
| 72h | 5.82E-07  | 2.50E-06 | 1.19E-06 | 4.89E-07 |
|     | cgd1_1240 |          |          |          |
| 2h  | 5.41E-07  | 3.97E-08 | 0.00E+00 | 1.40E-08 |
| 6h  | 4.44E-07  | 4.84E-08 | 1.05E-07 | 1.12E-07 |
| 12h | 9.84E-06  | 6.89E-06 | 2.04E-06 | 2.62E-06 |
| 24h | 8.86E-07  | 2.17E-06 | 3.17E-06 | 1.37E-06 |
| 36h | 6.85E-07  | 1.31E-06 | 2.88E-06 | 4.16E-06 |
| 48h | 4.69E-07  | 9.98E-07 | 1.36E-06 | 1.50E-06 |
| 72h | 3.42E-07  | 2.53E-06 | 2.18E-07 | 3.47E-07 |
|     | cgd1_1250 |          |          |          |
| 2h  | 2.79E-07  | 1.64E-07 | 3.80E-07 | 5.46E-07 |
| 6h  | 2.09E-06  | 2.71E-06 | 2.66E-06 | 1.92E-06 |
| 12h | 7.02E-06  | 1.30E-05 | 7.88E-06 | 7.37E-06 |

|           |          |          |          |          |
|-----------|----------|----------|----------|----------|
| 24h       | 8.97E-07 | 7.08E-06 | 1.11E-05 | 9.96E-07 |
| 36h       | 3.93E-06 | 5.83E-06 | 7.84E-06 | 7.56E-06 |
| 48h       | 9.57E-07 | 6.20E-06 | 5.90E-06 | 1.60E-06 |
| 72h       | 2.72E-06 | 3.32E-06 | 1.15E-05 | 2.71E-06 |
| cgd1_1270 |          |          |          |          |
| 2h        | 2.84E-03 | 1.03E-05 | 1.35E-05 | 2.77E-05 |
| 6h        | 7.35E-06 | 9.11E-06 | 4.82E-05 | 1.80E-04 |
| 12h       | 1.11E-03 | 2.24E-04 | 1.34E-05 | 1.00E-03 |
| 24h       | 3.40E-04 | 1.42E-04 | 7.80E-05 | 1.38E-03 |
| 36h       | 3.65E-03 | 1.18E-03 | 2.04E-04 | 3.15E-03 |
| 48h       | 1.12E-03 | 7.30E-04 | 1.11E-04 | 2.46E-03 |
| 72h       | 7.63E-03 | 2.77E-04 | 1.88E-04 | 4.68E-03 |
| cgd1_1260 |          |          |          |          |
| 2h        | 0.00E+00 | 6.22E-08 | 0.00E+00 | 4.44E-08 |
| 6h        | 0.00E+00 | 0.00E+00 | 0.00E+00 | 3.94E-08 |
| 12h       | 2.54E-07 | 5.03E-08 | 8.07E-09 | 4.37E-07 |
| 24h       | 1.57E-07 | 1.51E-06 | 9.81E-06 | 1.48E-07 |
| 36h       | 1.52E-06 | 1.09E-05 | 9.68E-06 | 1.73E-06 |
| 48h       | 4.62E-06 | 1.74E-05 | 5.27E-05 | 1.15E-06 |
| 72h       | 9.33E-06 | 1.53E-05 | 2.01E-05 | 3.77E-06 |
| cgd1_1280 |          |          |          |          |
| 2h        | 6.46E-05 | 5.96E-05 | 7.29E-05 | 1.05E-04 |
| 6h        | 5.77E-05 | 7.49E-05 | 7.16E-05 | 5.89E-05 |
| 12h       | 1.09E-05 | 6.89E-06 | 1.50E-05 | 1.66E-05 |
| 24h       | 7.67E-06 | 5.41E-05 | 5.14E-04 | 2.93E-05 |
| 36h       | 1.44E-05 | 2.89E-05 | 1.86E-05 | 1.51E-05 |
| 48h       | 4.35E-06 | 1.07E-05 | 3.03E-05 | 6.21E-06 |
| 72h       | 1.93E-06 | 2.42E-06 | 4.01E-06 | 7.79E-07 |
| cgd1_1290 |          |          |          |          |
| 2h        | 4.42E-05 | 2.85E-05 | 1.44E-05 | 2.24E-05 |
| 6h        | 1.65E-05 | 4.67E-05 | 6.71E-05 | 2.20E-05 |
| 12h       | 4.90E-06 | 2.04E-06 | 1.46E-05 | 6.45E-06 |
| 24h       | 3.16E-06 | 2.31E-05 | 1.62E-04 | 1.26E-05 |
| 36h       | 5.67E-06 | 2.58E-05 | 2.22E-05 | 6.89E-06 |
| 48h       | 5.33E-06 | 1.45E-05 | 4.75E-05 | 6.29E-06 |
| 72h       | 1.58E-06 | 4.29E-06 | 5.36E-06 | 8.41E-07 |
| cgd1_1300 |          |          |          |          |
| 2h        | 6.71E-03 | 2.22E-04 | 3.23E-05 | 5.32E-03 |
| 6h        | 7.84E-03 | 3.93E-04 | 9.39E-05 | 5.19E-03 |
| 12h       | 1.31E-03 | 1.48E-04 | 1.81E-05 | 9.18E-04 |
| 24h       | 1.78E-03 | 1.82E-04 | 4.20E-04 | 4.06E-03 |
| 36h       | 5.73E-04 | 8.29E-05 | 2.07E-05 | 6.98E-04 |
| 48h       | 5.22E-04 | 9.85E-05 | 4.33E-05 | 1.35E-03 |
| 72h       | 7.94E-04 | 8.64E-05 | 4.62E-05 | 1.14E-03 |
| cgd1_1310 |          |          |          |          |
| 2h        | 1.82E-05 | 3.60E-05 | 1.45E-05 | 2.42E-05 |
| 6h        | 3.76E-06 | 1.13E-05 | 5.76E-05 | 1.67E-05 |
| 12h       | 4.38E-06 | 2.59E-06 | 9.95E-06 | 7.01E-06 |
| 24h       | 9.27E-06 | 9.87E-06 | 1.86E-04 | 2.41E-05 |
| 36h       | 2.54E-06 | 2.78E-05 | 1.69E-05 | 4.80E-06 |
| 48h       | 3.25E-06 | 7.62E-06 | 2.50E-05 | 7.08E-06 |
| 72h       | 1.45E-06 | 9.29E-06 | 9.08E-06 | 7.35E-07 |
| cgd1_1330 |          |          |          |          |

|     |           |          |          |          |
|-----|-----------|----------|----------|----------|
| 2h  | 1.75E-05  | 1.56E-04 | 3.19E-05 | 5.87E-05 |
| 6h  | 1.32E-03  | 2.80E-04 | 1.07E-04 | 1.70E-03 |
| 12h | 3.22E-04  | 3.59E-06 | 2.75E-05 | 2.22E-04 |
| 24h | 1.94E-04  | 1.55E-04 | 1.76E-04 | 1.47E-03 |
| 36h | 1.16E-03  | 8.29E-04 | 3.61E-05 | 4.30E-04 |
| 48h | 1.20E-03  | 1.89E-04 | 6.20E-05 | 7.43E-04 |
| 72h | 7.74E-04  | 1.85E-04 | 1.49E-04 | 2.64E-04 |
|     | cgd1_1340 |          |          |          |
| 2h  | 2.34E-03  | 1.98E-04 | 3.47E-05 | 6.60E-03 |
| 6h  | 2.04E-04  | 3.21E-04 | 1.06E-04 | 4.21E-04 |
| 12h | 7.71E-05  | 8.62E-05 | 2.33E-05 | 5.41E-04 |
| 24h | 1.92E-04  | 8.43E-05 | 1.26E-04 | 5.83E-04 |
| 36h | 2.82E-04  | 1.82E-04 | 2.02E-05 | 4.81E-04 |
| 48h | 1.94E-04  | 1.37E-04 | 1.53E-04 | 1.62E-04 |
| 72h | 2.34E-04  | 2.35E-04 | 1.72E-05 | 2.11E-04 |
|     | cgd1_1350 |          |          |          |
| 2h  | 6.42E-08  | 5.84E-07 | 0.00E+00 | 7.76E-07 |
| 6h  | 2.46E-06  | 1.05E-06 | 1.08E-06 | 1.36E-06 |
| 12h | 2.21E-07  | 6.44E-07 | 8.30E-07 | 3.34E-07 |
| 24h | 4.91E-07  | 1.98E-07 | 9.72E-07 | 1.29E-06 |
| 36h | 1.68E-07  | 5.72E-07 | 7.78E-07 | 1.09E-06 |
| 48h | 6.27E-07  | 1.38E-07 | 3.87E-07 | 1.23E-06 |
| 72h | 1.85E-07  | 2.58E-07 | 2.86E-07 | 3.15E-07 |
|     | cgd1_1360 |          |          |          |
| 2h  | 0.00E+00  | 0.00E+00 | 0.00E+00 | 0.00E+00 |
| 6h  | 0.00E+00  | 0.00E+00 | 0.00E+00 | 0.00E+00 |
| 12h | 1.03E-04  | 1.14E-03 | 2.71E-04 | 1.20E-05 |
| 24h | 9.58E-05  | 5.64E-05 | 5.49E-05 | 1.81E-05 |
| 36h | 8.37E-05  | 1.06E-05 | 8.69E-05 | 6.04E-05 |
| 48h | 4.37E-04  | 6.97E-05 | 1.75E-04 | 1.56E-05 |
| 72h | 3.59E-04  | 1.44E-04 | 1.93E-04 | 4.05E-05 |
|     | cgd1_1370 |          |          |          |
| 2h  | 0.00E+00  | 0.00E+00 | 0.00E+00 | 0.00E+00 |
| 6h  | 0.00E+00  | 0.00E+00 | 0.00E+00 | 0.00E+00 |
| 12h | 5.75E-08  | 2.38E-07 | 2.22E-07 | 9.25E-08 |
| 24h | 7.19E-08  | 5.74E-08 | 5.03E-08 | 6.15E-08 |
| 36h | 4.41E-08  | 1.94E-07 | 4.67E-07 | 1.86E-07 |
| 48h | 9.11E-08  | 9.74E-08 | 8.81E-08 | 1.54E-07 |
| 72h | 1.18E-07  | 2.01E-07 | 1.79E-07 | 1.23E-07 |
|     | cgd1_1380 |          |          |          |
| 2h  | 4.59E-08  | 2.77E-07 | 1.31E-07 | 1.29E-08 |
| 6h  | 6.89E-09  | 1.03E-07 | 3.97E-08 | 7.87E-08 |
| 12h | 1.32E-06  | 1.22E-06 | 1.96E-06 | 1.32E-06 |
| 24h | 4.22E-07  | 3.17E-07 | 2.78E-07 | 1.23E-06 |
| 36h | 3.89E-07  | 1.44E-06 | 3.54E-06 | 3.21E-06 |
| 48h | 6.09E-07  | 4.44E-07 | 4.88E-07 | 1.71E-06 |
| 72h | 8.27E-07  | 7.08E-07 | 1.53E-06 | 7.55E-07 |
|     | cgd1_1390 |          |          |          |
| 2h  | 3.07E-08  | 4.15E-07 | 2.13E-09 | 8.95E-08 |
| 6h  | 3.29E-07  | 7.36E-08 | 3.08E-07 | 2.02E-07 |
| 12h | 1.02E-07  | 3.38E-07 | 3.14E-07 | 2.28E-07 |
| 24h | 1.06E-07  | 8.74E-08 | 3.79E-07 | 9.72E-07 |
| 36h | 1.97E-07  | 6.82E-07 | 1.06E-06 | 6.69E-07 |



|     |           |          |          |          |
|-----|-----------|----------|----------|----------|
| 48h | 3.60E-07  | 3.43E-07 | 4.87E-07 | 9.14E-07 |
| 72h | 1.63E-06  | 7.47E-07 | 1.13E-06 | 8.31E-07 |
|     | cgd1_1400 |          |          |          |
| 2h  | 7.98E-08  | 2.84E-08 | 1.31E-07 | 1.69E-06 |
| 6h  | 0.00E+00  | 2.24E-07 | 2.52E-07 | 1.59E-07 |
| 12h | 1.44E-07  | 2.00E-07 | 4.22E-07 | 8.15E-07 |
| 24h | 1.32E-07  | 1.82E-07 | 5.49E-07 | 1.98E-06 |
| 36h | 3.19E-07  | 8.73E-07 | 1.62E-06 | 4.47E-06 |
| 48h | 1.60E-06  | 1.30E-06 | 1.38E-06 | 6.72E-06 |
| 72h | 3.00E-06  | 1.87E-06 | 3.46E-06 | 8.54E-06 |
|     | cgd1_1410 |          |          |          |
| 2h  | 3.02E-07  | 2.53E-06 | 8.42E-06 | 2.02E-05 |
| 6h  | 1.96E-06  | 4.27E-06 | 4.24E-06 | 9.25E-06 |
| 12h | 8.19E-07  | 4.43E-07 | 1.81E-06 | 5.49E-06 |
| 24h | 1.18E-06  | 1.37E-06 | 3.91E-06 | 6.26E-06 |
| 36h | 1.36E-06  | 2.08E-06 | 2.06E-06 | 8.91E-06 |
| 48h | 1.47E-06  | 1.24E-06 | 2.80E-06 | 7.97E-06 |
| 72h | 7.71E-07  | 6.37E-07 | 6.18E-07 | 1.67E-06 |
|     | cgd1_1420 |          |          |          |
| 2h  | 1.34E-07  | 3.46E-07 | 0.00E+00 | 1.45E-05 |
| 6h  | 6.91E-06  | 8.64E-06 | 4.97E-05 | 1.08E-04 |
| 12h | 7.58E-07  | 0.00E+00 | 8.71E-07 | 1.63E-05 |
| 24h | 1.20E-06  | 3.19E-06 | 3.14E-05 | 1.25E-04 |
| 36h | 6.21E-06  | 7.73E-06 | 1.84E-05 | 2.91E-04 |
| 48h | 2.63E-05  | 8.67E-06 | 1.48E-05 | 2.57E-04 |
| 72h | 8.98E-05  | 2.22E-06 | 3.37E-06 | 6.86E-05 |
|     | cgd1_1430 |          |          |          |
| 2h  | 1.20E-07  | 7.03E-07 | 8.07E-07 | 3.67E-07 |
| 6h  | 0.00E+00  | 1.78E-08 | 0.00E+00 | 6.48E-09 |
| 12h | 2.79E-07  | 4.60E-07 | 1.56E-06 | 9.57E-07 |
| 24h | 4.22E-07  | 3.84E-07 | 3.76E-07 | 3.81E-07 |
| 36h | 3.14E-07  | 2.84E-07 | 1.14E-06 | 3.54E-06 |
| 48h | 5.52E-07  | 2.31E-07 | 4.87E-07 | 1.09E-06 |
| 72h | 1.70E-07  | 3.30E-08 | 9.03E-08 | 9.92E-08 |
|     | cgd1_1440 |          |          |          |
| 2h  | 2.18E-07  | 1.44E-07 | 1.18E-07 | 6.51E-06 |
| 6h  | 0.00E+00  | 7.14E-09 | 0.00E+00 | 0.00E+00 |
| 12h | 8.57E-07  | 1.56E-06 | 1.25E-06 | 2.08E-06 |
| 24h | 3.03E-07  | 4.28E-07 | 7.13E-07 | 2.89E-07 |
| 36h | 2.28E-07  | 3.19E-07 | 6.50E-07 | 4.14E-06 |
| 48h | 1.57E-06  | 3.54E-07 | 4.11E-07 | 8.02E-07 |
| 72h | 9.16E-08  | 2.94E-08 | 1.72E-08 | 7.05E-08 |
|     | cgd1_1450 |          |          |          |
| 2h  | 5.87E-05  | 4.20E-04 | 5.88E-04 | 2.46E-03 |
| 6h  | 1.28E-05  | 1.33E-05 | 2.58E-05 | 1.13E-04 |
| 12h | 1.21E-04  | 2.50E-05 | 8.66E-05 | 3.54E-04 |
| 24h | 5.75E-05  | 4.41E-05 | 9.62E-05 | 3.54E-04 |
| 36h | 1.22E-05  | 1.24E-05 | 2.43E-05 | 3.41E-04 |
| 48h | 5.48E-05  | 9.51E-06 | 3.97E-05 | 6.40E-04 |
| 72h | 1.23E-05  | 1.96E-06 | 2.30E-06 | 3.95E-05 |
|     | cgd1_1460 |          |          |          |
| 2h  | 1.18E-07  | 2.07E-07 | 4.38E-07 | 1.14E-07 |
| 6h  | 6.73E-09  | 1.08E-07 | 8.90E-09 | 8.32E-09 |

|     |           |          |          |          |
|-----|-----------|----------|----------|----------|
| 12h | 5.00E-07  | 2.25E-07 | 1.17E-07 | 7.66E-07 |
| 24h | 3.15E-07  | 1.41E-07 | 1.03E-06 | 4.95E-07 |
| 36h | 7.41E-07  | 6.33E-07 | 1.34E-06 | 2.55E-06 |
| 48h | 1.77E-06  | 5.27E-07 | 1.01E-06 | 1.94E-06 |
| 72h | 7.62E-07  | 5.25E-07 | 6.50E-07 | 0.00E+00 |
|     | cgd1_1480 |          |          |          |
| 2h  | 2.41E-06  | 5.05E-07 | 2.45E-06 | 3.98E-07 |
| 6h  | 1.33E-06  | 3.59E-07 | 5.27E-07 | 7.61E-07 |
| 12h | 6.47E-08  | 2.39E-07 | 1.68E-07 | 3.06E-07 |
| 24h | 5.69E-07  | 3.44E-07 | 6.58E-07 | 1.32E-06 |
| 36h | 1.28E-06  | 1.54E-07 | 2.86E-07 | 2.12E-07 |
| 48h | 1.99E-07  | 3.94E-07 | 1.43E-06 | 6.94E-07 |
| 72h | 8.16E-08  | 9.13E-08 | 9.30E-08 | 9.95E-08 |
|     | cgd1_1490 |          |          |          |
| 2h  | 0.00E+00  | 0.00E+00 | 0.00E+00 | 0.00E+00 |
| 6h  | 1.06E-05  | 4.60E-07 | 6.04E-06 | 4.82E-06 |
| 12h | 2.75E-05  | 3.47E-05 | 2.34E-04 | 1.66E-04 |
| 24h | 2.94E-05  | 2.50E-05 | 4.39E-04 | 1.63E-04 |
| 36h | 5.21E-05  | 2.67E-05 | 2.04E-04 | 1.27E-04 |
| 48h | 5.86E-05  | 4.04E-05 | 2.65E-04 | 2.58E-04 |
| 72h | 1.60E-04  | 9.14E-05 | 3.17E-04 | 4.03E-04 |
|     | cgd1_1500 |          |          |          |
| 2h  | 4.05E-06  | 2.81E-07 | 1.78E-06 | 1.94E-06 |
| 6h  | 3.03E-06  | 6.34E-07 | 2.10E-06 | 1.49E-06 |
| 12h | 4.32E-07  | 4.06E-07 | 1.36E-06 | 2.22E-06 |
| 24h | 3.47E-07  | 7.65E-07 | 2.13E-06 | 3.22E-06 |
| 36h | 7.89E-07  | 5.76E-07 | 1.31E-06 | 1.65E-06 |
| 48h | 6.18E-07  | 5.71E-07 | 9.19E-07 | 1.96E-06 |
| 72h | 3.69E-06  | 2.69E-06 | 4.21E-06 | 6.36E-06 |
|     | cgd1_1510 |          |          |          |
| 2h  | 0.00E+00  | 0.00E+00 | 0.00E+00 | 0.00E+00 |
| 6h  | 0.00E+00  | 0.00E+00 | 0.00E+00 | 0.00E+00 |
| 12h | 3.20E-08  | 4.04E-08 | 7.66E-08 | 9.99E-08 |
| 24h | 1.97E-08  | 2.07E-08 | 0.00E+00 | 2.24E-08 |
| 36h | 1.50E-08  | 3.40E-08 | 5.57E-08 | 1.51E-07 |
| 48h | 2.57E-06  | 2.74E-06 | 4.56E-06 | 1.19E-05 |
| 72h | 7.15E-06  | 3.10E-06 | 2.28E-06 | 9.29E-06 |
|     | cgd1_1520 |          |          |          |
| 2h  | 0.00E+00  | 0.00E+00 | 0.00E+00 | 0.00E+00 |
| 6h  | 0.00E+00  | 0.00E+00 | 7.85E-10 | 0.00E+00 |
| 12h | 4.19E-07  | 1.25E-07 | 1.63E-07 | 3.50E-07 |
| 24h | 2.27E-08  | 5.84E-08 | 1.16E-07 | 6.13E-08 |
| 36h | 2.07E-07  | 2.06E-07 | 1.01E-07 | 3.79E-07 |
| 48h | 2.90E-08  | 3.43E-08 | 7.72E-08 | 7.35E-08 |
| 72h | 6.02E-07  | 8.76E-07 | 2.22E-07 | 1.31E-06 |
|     | cgd1_1530 |          |          |          |
| 2h  | 4.24E-05  | 1.53E-05 | 1.08E-05 | 2.41E-03 |
| 6h  | 1.64E-05  | 2.50E-05 | 9.94E-04 | 1.38E-04 |
| 12h | 1.73E-06  | 6.48E-07 | 1.72E-04 | 1.05E-05 |
| 24h | 1.54E-05  | 5.65E-06 | 1.59E-04 | 8.87E-05 |
| 36h | 8.07E-05  | 2.76E-05 | 1.06E-04 | 8.74E-05 |
| 48h | 5.47E-05  | 1.84E-05 | 1.03E-04 | 1.59E-04 |
| 72h | 1.06E-05  | 1.20E-05 | 1.44E-04 | 1.36E-05 |

|     |           |          |          |          |
|-----|-----------|----------|----------|----------|
|     | cgd1_1550 |          |          |          |
| 2h  | 2.54E-06  | 4.02E-07 | 4.42E-07 | 4.77E-07 |
| 6h  | 5.60E-06  | 8.84E-07 | 7.79E-07 | 9.23E-07 |
| 12h | 2.79E-07  | 3.59E-08 | 1.64E-07 | 2.76E-07 |
| 24h | 2.17E-07  | 1.65E-07 | 9.49E-07 | 4.96E-07 |
| 36h | 5.98E-07  | 9.43E-07 | 5.35E-07 | 8.94E-07 |
| 48h | 3.75E-07  | 1.94E-07 | 4.06E-07 | 5.91E-07 |
| 72h | 3.23E-07  | 4.01E-07 | 1.90E-07 | 3.04E-07 |
|     | cgd1_1560 |          |          |          |
| 2h  | 9.00E-05  | 2.20E-05 | 2.38E-05 | 1.64E-05 |
| 6h  | 1.80E-06  | 1.78E-06 | 2.54E-06 | 1.97E-06 |
| 12h | 2.30E-05  | 1.03E-05 | 2.43E-05 | 3.40E-05 |
| 24h | 1.55E-05  | 9.30E-06 | 1.72E-05 | 9.87E-06 |
| 36h | 6.28E-06  | 1.45E-05 | 1.57E-05 | 9.61E-06 |
| 48h | 1.06E-05  | 2.52E-06 | 1.77E-05 | 6.82E-06 |
| 72h | 3.54E-06  | 4.38E-06 | 2.91E-06 | 1.98E-06 |
|     | cgd1_1570 |          |          |          |
| 2h  | 9.45E-06  | 2.72E-06 | 4.92E-06 | 2.54E-06 |
| 6h  | 1.85E-06  | 1.28E-06 | 1.08E-06 | 1.03E-06 |
| 12h | 8.81E-07  | 1.47E-06 | 7.79E-07 | 5.46E-06 |
| 24h | 1.13E-06  | 8.62E-07 | 3.45E-06 | 2.27E-06 |
| 36h | 1.46E-06  | 2.20E-06 | 1.89E-06 | 3.59E-06 |
| 48h | 1.52E-06  | 1.09E-06 | 1.98E-06 | 2.45E-06 |
| 72h | 5.25E-07  | 6.09E-07 | 4.95E-07 | 9.28E-07 |
|     | cgd1_1580 |          |          |          |
| 2h  | 1.68E-04  | 1.01E-04 | 1.35E-03 | 5.54E-05 |
| 6h  | 4.54E-05  | 2.43E-05 | 3.52E-05 | 1.95E-05 |
| 12h | 4.63E-05  | 3.32E-05 | 1.88E-04 | 1.20E-04 |
| 24h | 1.49E-04  | 7.10E-05 | 3.87E-04 | 9.02E-05 |
| 36h | 1.12E-05  | 3.45E-05 | 1.32E-04 | 7.56E-05 |
| 48h | 2.19E-05  | 1.63E-05 | 8.81E-05 | 4.70E-05 |
| 72h | 2.83E-06  | 6.09E-06 | 2.47E-05 | 6.72E-06 |
|     | cgd1_1610 |          |          |          |
| 2h  | 4.11E-05  | 1.35E-05 | 6.29E-05 | 1.21E-05 |
| 6h  | 3.01E-06  | 9.41E-07 | 4.85E-05 | 0.00E+00 |
| 12h | 0.00E+00  | 0.00E+00 | 8.96E-06 | 6.98E-07 |
| 24h | 4.68E-06  | 3.80E-06 | 1.03E-04 | 1.55E-05 |
| 36h | 2.67E-06  | 1.27E-05 | 1.64E-04 | 2.82E-05 |
| 48h | 5.72E-05  | 4.17E-05 | 5.53E-04 | 1.91E-04 |
| 72h | 3.69E-05  | 4.00E-05 | 1.64E-04 | 5.27E-04 |
|     | cgd1_1630 |          |          |          |
| 2h  | 1.36E-05  | 1.01E-05 | 8.77E-06 | 8.71E-06 |
| 6h  | 4.17E-06  | 1.64E-06 | 1.22E-06 | 2.88E-06 |
| 12h | 6.65E-07  | 6.03E-07 | 1.86E-06 | 4.63E-06 |
| 24h | 1.09E-06  | 1.24E-06 | 1.96E-06 | 5.59E-06 |
| 36h | 7.98E-07  | 2.37E-06 | 1.25E-06 | 2.27E-06 |
| 48h | 6.02E-07  | 4.61E-07 | 5.90E-07 | 1.64E-06 |
| 72h | 3.72E-07  | 2.33E-07 | 5.00E-07 | 4.55E-07 |
|     | cgd1_1640 |          |          |          |
| 2h  | 1.20E-06  | 7.32E-06 | 7.98E-06 | 3.89E-08 |
| 6h  | 5.07E-06  | 4.95E-06 | 4.29E-06 | 2.47E-07 |
| 12h | 1.76E-07  | 2.16E-07 | 3.07E-07 | 4.22E-07 |
| 24h | 1.34E-06  | 6.66E-07 | 1.65E-06 | 2.02E-06 |

|     |           |          |          |          |
|-----|-----------|----------|----------|----------|
| 36h | 2.91E-07  | 1.34E-06 | 9.77E-07 | 7.79E-07 |
| 48h | 2.52E-06  | 1.33E-06 | 1.86E-06 | 4.01E-07 |
| 72h | 2.04E-07  | 1.74E-07 | 2.12E-07 | 1.65E-07 |
|     | cgd1_1650 |          |          |          |
| 2h  | 2.71E-06  | 4.96E-05 | 3.90E-05 | 8.81E-06 |
| 6h  | 2.45E-04  | 9.97E-05 | 4.29E-06 | 0.00E+00 |
| 12h | 1.10E-05  | 4.21E-05 | 8.99E-04 | 1.92E-05 |
| 24h | 1.41E-04  | 1.17E-05 | 6.72E-05 | 6.27E-06 |
| 36h | 1.71E-04  | 6.86E-05 | 3.89E-04 | 8.45E-06 |
| 48h | 2.78E-03  | 5.76E-05 | 1.39E-03 | 2.52E-05 |
| 72h | 9.40E-04  | 1.46E-05 | 2.48E-03 | 1.15E-05 |
|     | cgd1_1670 |          |          |          |
| 2h  | 2.49E-03  | 4.86E-05 | 3.12E-03 | 1.45E-05 |
| 6h  | 1.70E-03  | 2.63E-04 | 3.24E-04 | 9.97E-06 |
| 12h | 4.72E-03  | 1.39E-04 | 5.57E-04 | 2.13E-05 |
| 24h | 9.33E-04  | 1.90E-04 | 4.55E-05 | 3.40E-05 |
| 36h | 1.37E-03  | 3.76E-05 | 8.72E-04 | 6.58E-06 |
| 48h | 1.69E-03  | 3.11E-05 | 1.47E-04 | 8.12E-06 |
| 72h | 2.38E-03  | 3.73E-05 | 7.56E-04 | 2.33E-05 |
|     | cgd1_1680 |          |          |          |
| 2h  | 1.27E-08  | 0.00E+00 | 0.00E+00 | 0.00E+00 |
| 6h  | 0.00E+00  | 1.81E-09 | 2.43E-09 | 9.91E-10 |
| 12h | 0.00E+00  | 1.35E-09 | 1.32E-09 | 0.00E+00 |
| 24h | 6.30E-10  | 3.86E-09 | 5.81E-09 | 1.91E-08 |
| 36h | 1.65E-08  | 2.44E-08 | 3.98E-08 | 4.38E-08 |
| 48h | 5.51E-07  | 3.28E-07 | 5.43E-07 | 8.99E-07 |
| 72h | 1.12E-06  | 6.59E-07 | 2.25E-06 | 5.35E-07 |
|     | cgd1_1690 |          |          |          |
| 2h  | 0.00E+00  | 5.99E-09 | 0.00E+00 | 1.83E-09 |
| 6h  | 2.69E-09  | 0.00E+00 | 6.45E-10 | 0.00E+00 |
| 12h | 1.54E-09  | 0.00E+00 | 0.00E+00 | 0.00E+00 |
| 24h | 2.94E-10  | 7.17E-09 | 2.01E-09 | 4.02E-10 |
| 36h | 1.24E-09  | 1.62E-08 | 2.53E-08 | 2.90E-09 |
| 48h | 1.55E-08  | 1.33E-08 | 9.43E-09 | 1.22E-08 |
| 72h | 1.28E-07  | 4.65E-08 | 3.43E-07 | 1.15E-07 |
|     | cgd1_1700 |          |          |          |
| 2h  | 4.40E-07  | 7.40E-07 | 1.65E-07 | 3.23E-09 |
| 6h  | 2.83E-06  | 2.15E-05 | 7.18E-07 | 8.43E-07 |
| 12h | 5.39E-06  | 5.43E-05 | 5.94E-06 | 8.47E-05 |
| 24h | 8.55E-07  | 3.55E-05 | 2.25E-06 | 9.61E-05 |
| 36h | 8.06E-06  | 4.10E-05 | 2.96E-05 | 3.07E-04 |
| 48h | 9.56E-06  | 2.42E-05 | 7.46E-06 | 2.01E-04 |
| 72h | 1.07E-05  | 3.20E-05 | 1.01E-05 | 8.59E-05 |
|     | cgd1_1710 |          |          |          |
| 2h  | 4.23E-07  | 2.90E-07 | 2.80E-07 | 1.29E-07 |
| 6h  | 3.94E-07  | 1.40E-06 | 8.75E-07 | 5.71E-07 |
| 12h | 7.52E-08  | 1.48E-07 | 4.68E-07 | 1.25E-06 |
| 24h | 1.92E-07  | 1.37E-06 | 4.69E-07 | 3.20E-05 |
| 36h | 1.63E-06  | 2.18E-06 | 3.23E-06 | 1.06E-05 |
| 48h | 1.24E-06  | 1.06E-06 | 1.16E-06 | 1.23E-05 |
| 72h | 7.80E-07  | 5.72E-07 | 1.22E-06 | 2.89E-06 |
|     | cgd1_1740 |          |          |          |
| 2h  | 0.00E+00  | 0.00E+00 | 0.00E+00 | 1.49E-08 |

|     |           |          |          |          |
|-----|-----------|----------|----------|----------|
| 6h  | 4.48E-07  | 3.88E-07 | 2.73E-07 | 8.40E-08 |
| 12h | 2.64E-07  | 1.37E-07 | 3.89E-07 | 1.31E-06 |
| 24h | 1.09E-07  | 3.54E-07 | 9.64E-08 | 3.51E-06 |
| 36h | 5.60E-07  | 7.04E-07 | 1.10E-06 | 2.09E-06 |
| 48h | 6.75E-07  | 3.32E-07 | 4.64E-07 | 1.96E-06 |
| 72h | 6.39E-07  | 1.04E-07 | 2.37E-07 | 2.35E-07 |
|     | cgd1_1750 |          |          |          |
| 2h  | 1.09E-04  | 1.44E-04 | 1.25E-03 | 4.53E-05 |
| 6h  | 8.44E-05  | 6.31E-04 | 6.79E-04 | 4.05E-06 |
| 12h | 9.43E-04  | 5.25E-04 | 3.64E-03 | 8.95E-05 |
| 24h | 4.03E-04  | 4.42E-04 | 7.58E-04 | 4.29E-05 |
| 36h | 2.14E-04  | 2.83E-04 | 2.71E-03 | 1.44E-05 |
| 48h | 5.34E-04  | 9.14E-05 | 1.73E-03 | 2.27E-05 |
| 72h | 7.83E-04  | 1.01E-04 | 9.49E-04 | 1.01E-05 |
|     | cgd1_1760 |          |          |          |
| 2h  | 6.89E-07  | 2.19E-06 | 2.45E-07 | 6.17E-08 |
| 6h  | 1.02E-06  | 5.55E-07 | 3.62E-07 | 6.68E-08 |
| 12h | 4.98E-07  | 2.64E-07 | 1.07E-06 | 1.63E-06 |
| 24h | 3.52E-07  | 3.31E-07 | 1.30E-06 | 3.00E-06 |
| 36h | 2.71E-07  | 6.12E-07 | 1.32E-06 | 8.85E-07 |
| 48h | 7.78E-07  | 5.72E-07 | 1.33E-06 | 6.86E-07 |
| 72h | 7.83E-08  | 1.38E-07 | 4.25E-08 | 2.26E-08 |
|     | cgd1_1780 |          |          |          |
| 2h  | 8.01E-07  | 2.32E-07 | 4.75E-07 | 7.78E-08 |
| 6h  | 5.44E-07  | 6.91E-07 | 5.72E-07 | 1.19E-07 |
| 12h | 6.81E-08  | 1.01E-08 | 3.34E-07 | 1.20E-06 |
| 24h | 1.38E-07  | 1.42E-07 | 6.05E-07 | 2.28E-06 |
| 36h | 1.89E-07  | 5.88E-07 | 3.79E-07 | 6.03E-07 |
| 48h | 4.22E-07  | 3.19E-07 | 3.38E-07 | 3.02E-07 |
| 72h | 1.09E-07  | 8.47E-08 | 4.75E-08 | 4.70E-08 |
|     | cgd1_1790 |          |          |          |
| 2h  | 7.23E-06  | 1.68E-05 | 1.41E-04 | 1.62E-06 |
| 6h  | 9.02E-06  | 2.59E-05 | 9.30E-06 | 8.91E-06 |
| 12h | 2.36E-06  | 1.68E-05 | 5.76E-05 | 6.75E-05 |
| 24h | 6.75E-06  | 9.03E-06 | 1.50E-04 | 1.39E-04 |
| 36h | 1.20E-05  | 2.22E-05 | 4.23E-05 | 1.67E-04 |
| 48h | 7.86E-06  | 1.40E-05 | 1.19E-05 | 8.04E-05 |
| 72h | 1.60E-06  | 3.19E-06 | 4.21E-06 | 6.44E-05 |
|     | cgd1_1800 |          |          |          |
| 2h  | 4.87E-07  | 1.04E-06 | 1.67E-07 | 1.30E-07 |
| 6h  | 3.20E-06  | 1.26E-06 | 4.39E-06 | 3.75E-06 |
| 12h | 2.75E-08  | 2.30E-07 | 1.67E-07 | 2.82E-07 |
| 24h | 1.15E-06  | 2.17E-07 | 1.19E-06 | 4.45E-06 |
| 36h | 5.07E-07  | 6.32E-07 | 4.56E-07 | 6.37E-07 |
| 48h | 1.37E-06  | 1.02E-07 | 1.70E-07 | 5.07E-07 |
| 72h | 3.38E-08  | 6.56E-08 | 6.35E-08 | 6.28E-08 |
|     | cgd1_1810 |          |          |          |
| 2h  | 0.00E+00  | 0.00E+00 | 0.00E+00 | 0.00E+00 |
| 6h  | 0.00E+00  | 0.00E+00 | 0.00E+00 | 0.00E+00 |
| 12h | 4.62E-08  | 5.77E-08 | 2.36E-08 | 8.48E-08 |
| 24h | 5.53E-08  | 2.58E-08 | 1.06E-07 | 2.72E-07 |
| 36h | 8.92E-08  | 1.59E-07 | 1.30E-07 | 3.77E-07 |
| 48h | 1.69E-07  | 2.56E-08 | 7.63E-08 | 6.85E-08 |

|     |           |          |          |          |
|-----|-----------|----------|----------|----------|
| 72h | 7.65E-09  | 6.31E-08 | 1.39E-08 | 3.47E-08 |
|     | cgd1_1820 |          |          |          |
| 2h  | 2.45E-08  | 2.49E-09 | 5.57E-09 | 0.00E+00 |
| 6h  | 0.00E+00  | 5.36E-09 | 9.73E-09 | 0.00E+00 |
| 12h | 4.87E-08  | 9.95E-08 | 1.59E-08 | 1.78E-07 |
| 24h | 9.93E-08  | 5.03E-08 | 4.13E-08 | 4.43E-07 |
| 36h | 9.38E-08  | 1.52E-07 | 1.65E-07 | 3.67E-07 |
| 48h | 3.01E-07  | 7.72E-08 | 8.06E-08 | 1.87E-07 |
| 72h | 1.23E-07  | 7.87E-08 | 2.05E-07 | 2.26E-07 |
|     | cgd1_1830 |          |          |          |
| 2h  | 2.69E-02  | 8.05E-03 | 3.21E-03 | 2.09E-02 |
| 6h  | 5.45E-03  | 5.28E-03 | 2.94E-03 | 1.57E-02 |
| 12h | 1.44E-03  | 2.99E-04 | 7.18E-04 | 3.85E-03 |
| 24h | 2.55E-03  | 9.02E-04 | 1.67E-03 | 6.83E-03 |
| 36h | 3.18E-03  | 7.17E-04 | 5.55E-04 | 9.66E-04 |
| 48h | 3.47E-03  | 8.86E-04 | 8.32E-04 | 4.74E-03 |
| 72h | 1.21E-03  | 3.63E-04 | 4.88E-04 | 8.73E-04 |
|     | cgd1_1840 |          |          |          |
| 2h  | 1.82E-06  | 5.04E-06 | 2.67E-06 | 4.10E-07 |
| 6h  | 1.03E-06  | 8.98E-07 | 1.20E-06 | 2.42E-06 |
| 12h | 1.49E-07  | 2.72E-07 | 1.26E-06 | 1.86E-06 |
| 24h | 9.81E-07  | 6.03E-07 | 8.16E-07 | 1.71E-06 |
| 36h | 2.24E-06  | 1.48E-06 | 1.41E-06 | 4.38E-06 |
| 48h | 1.39E-06  | 3.96E-07 | 5.14E-07 | 1.22E-06 |
| 72h | 3.90E-07  | 1.90E-07 | 2.65E-07 | 2.39E-07 |
|     | cgd1_1850 |          |          |          |
| 2h  | 8.74E-07  | 0.00E+00 | 6.87E-08 | 1.28E-07 |
| 6h  | 5.03E-07  | 1.27E-06 | 1.94E-06 | 1.54E-05 |
| 12h | 1.49E-06  | 1.41E-06 | 8.44E-07 | 3.87E-06 |
| 24h | 4.29E-07  | 9.31E-07 | 1.46E-06 | 1.45E-05 |
| 36h | 3.13E-06  | 2.51E-06 | 3.83E-06 | 8.03E-06 |
| 48h | 2.61E-06  | 2.46E-06 | 1.53E-06 | 3.19E-05 |
| 72h | 6.41E-07  | 1.08E-06 | 5.03E-07 | 1.91E-06 |
|     | cgd1_1860 |          |          |          |
| 2h  | 1.23E-06  | 4.92E-07 | 5.97E-06 | 0.00E+00 |
| 6h  | 6.90E-05  | 4.37E-05 | 5.74E-05 | 1.68E-03 |
| 12h | 7.17E-07  | 1.16E-05 | 1.63E-06 | 3.69E-07 |
| 24h | 1.08E-05  | 8.66E-06 | 1.87E-05 | 4.48E-04 |
| 36h | 4.98E-05  | 1.90E-05 | 1.53E-05 | 2.26E-04 |
| 48h | 4.17E-04  | 8.37E-06 | 1.41E-05 | 1.47E-04 |
| 72h | 8.96E-06  | 3.12E-06 | 5.62E-06 | 6.98E-05 |
|     | cgd1_1870 |          |          |          |
| 2h  | 0.00E+00  | 2.44E-07 | 0.00E+00 | 0.00E+00 |
| 6h  | 0.00E+00  | 0.00E+00 | 5.78E-08 | 0.00E+00 |
| 12h | 3.48E-04  | 1.58E-04 | 1.86E-05 | 3.92E-04 |
| 24h | 1.25E-05  | 1.24E-05 | 6.75E-06 | 3.37E-05 |
| 36h | 1.43E-05  | 6.30E-06 | 1.44E-05 | 1.40E-04 |
| 48h | 9.09E-06  | 2.34E-06 | 4.06E-06 | 2.89E-05 |
| 72h | 6.00E-05  | 3.00E-06 | 2.90E-06 | 6.33E-06 |
|     | cgd1_1880 |          |          |          |
| 2h  | 0.00E+00  | 0.00E+00 | 8.61E-09 | 4.71E-09 |
| 6h  | 0.00E+00  | 0.00E+00 | 0.00E+00 | 0.00E+00 |
| 12h | 0.00E+00  | 0.00E+00 | 7.97E-09 | 1.33E-07 |

|           |          |          |          |          |
|-----------|----------|----------|----------|----------|
| 24h       | 4.70E-09 | 5.22E-09 | 1.95E-09 | 1.84E-09 |
| 36h       | 4.80E-08 | 7.49E-09 | 2.23E-08 | 2.20E-07 |
| 48h       | 1.12E-07 | 8.95E-08 | 7.88E-08 | 4.48E-07 |
| 72h       | 5.78E-08 | 1.38E-08 | 1.59E-08 | 3.56E-08 |
| cgd1_1890 |          |          |          |          |
| 2h        | 0.00E+00 | 0.00E+00 | 0.00E+00 | 0.00E+00 |
| 6h        | 1.15E-07 | 6.65E-08 | 7.31E-08 | 1.07E-07 |
| 12h       | 5.63E-08 | 1.26E-08 | 2.17E-08 | 2.22E-08 |
| 24h       | 3.61E-08 | 8.34E-08 | 2.84E-07 | 6.43E-07 |
| 36h       | 2.04E-07 | 1.43E-07 | 1.43E-07 | 2.72E-07 |
| 48h       | 4.05E-07 | 2.15E-07 | 2.52E-07 | 5.26E-07 |
| 72h       | 3.97E-08 | 2.64E-08 | 1.94E-08 | 5.41E-08 |
| cgd1_1910 |          |          |          |          |
| 2h        | 1.12E-08 | 5.80E-08 | 0.00E+00 | 1.39E-08 |
| 6h        | 0.00E+00 | 3.84E-08 | 1.48E-09 | 9.09E-09 |
| 12h       | 2.26E-08 | 0.00E+00 | 9.16E-09 | 2.08E-08 |
| 24h       | 4.44E-08 | 3.21E-08 | 3.77E-08 | 1.03E-07 |
| 36h       | 3.96E-08 | 2.55E-08 | 4.68E-08 | 7.38E-08 |
| 48h       | 2.24E-06 | 5.27E-07 | 3.24E-07 | 2.04E-06 |
| 72h       | 2.84E-06 | 4.98E-07 | 4.94E-07 | 3.73E-07 |
| cgd1_1980 |          |          |          |          |
| 2h        | 3.90E-05 | 3.83E-06 | 5.25E-05 | 8.48E-06 |
| 6h        | 2.93E-06 | 1.62E-05 | 9.24E-06 | 6.21E-06 |
| 12h       | 5.48E-07 | 4.40E-07 | 1.01E-06 | 3.97E-06 |
| 24h       | 1.62E-06 | 1.02E-06 | 2.88E-06 | 1.19E-05 |
| 36h       | 2.91E-06 | 1.07E-06 | 1.36E-06 | 4.61E-06 |
| 48h       | 1.68E-06 | 3.74E-07 | 7.65E-07 | 1.78E-06 |
| 72h       | 8.64E-07 | 3.38E-07 | 4.92E-07 | 1.25E-06 |
| cgd1_2010 |          |          |          |          |
| 2h        | 7.88E-07 | 2.14E-06 | 0.00E+00 | 2.93E-06 |
| 6h        | 8.33E-06 | 2.80E-04 | 5.18E-05 | 4.05E-05 |
| 12h       | 1.18E-06 | 9.23E-06 | 5.06E-04 | 6.04E-06 |
| 24h       | 3.04E-06 | 1.74E-04 | 1.08E-03 | 2.18E-05 |
| 36h       | 6.75E-06 | 1.73E-04 | 2.01E-04 | 1.58E-05 |
| 48h       | 1.41E-05 | 5.67E-04 | 5.08E-04 | 2.80E-05 |
| 72h       | 4.53E-06 | 1.66E-05 | 1.33E-04 | 1.63E-05 |
| cgd1_2170 |          |          |          |          |
| 2h        | 1.29E-02 | 1.70E-04 | 0.00E+00 | 8.84E-03 |
| 6h        | 3.39E-03 | 2.96E-04 | 6.07E-05 | 4.48E-03 |
| 12h       | 8.71E-05 | 6.97E-05 | 4.02E-05 | 1.41E-02 |
| 24h       | 8.49E-04 | 7.04E-05 | 6.12E-05 | 4.40E-03 |
| 36h       | 6.06E-04 | 1.26E-04 | 5.78E-05 | 8.40E-04 |
| 48h       | 2.40E-04 | 6.74E-05 | 5.45E-05 | 2.06E-03 |
| 72h       | 4.16E-04 | 1.23E-05 | 2.33E-05 | 9.69E-04 |
| cgd1_2220 |          |          |          |          |
| 2h        | 2.47E-05 | 9.61E-06 | 1.02E-04 | 2.93E-04 |
| 6h        | 2.06E-05 | 8.66E-05 | 1.20E-04 | 3.57E-04 |
| 12h       | 3.92E-06 | 5.41E-06 | 2.32E-05 | 9.17E-05 |
| 24h       | 4.08E-05 | 5.13E-05 | 3.95E-05 | 3.91E-04 |
| 36h       | 2.05E-05 | 1.66E-05 | 2.82E-05 | 3.17E-04 |
| 48h       | 7.54E-05 | 4.84E-05 | 5.38E-05 | 1.98E-04 |
| 72h       | 1.58E-05 | 9.48E-06 | 1.75E-05 | 1.45E-04 |
| cgd1_2250 |          |          |          |          |

|     |           |          |          |          |
|-----|-----------|----------|----------|----------|
| 2h  | 5.46E-04  | 1.55E-03 | 5.09E-03 | 1.14E-04 |
| 6h  | 1.14E-03  | 4.57E-03 | 6.78E-03 | 7.54E-05 |
| 12h | 3.42E-04  | 2.28E-04 | 0.00E+00 | 1.85E-05 |
| 24h | 8.24E-04  | 4.06E-04 | 2.99E-04 | 7.58E-05 |
| 36h | 7.35E-04  | 1.45E-04 | 2.38E-04 | 2.95E-05 |
| 48h | 4.85E-04  | 3.11E-04 | 1.40E-04 | 5.90E-05 |
| 72h | 1.08E-04  | 8.16E-05 | 5.64E-04 | 9.60E-05 |
|     | cgd1_2260 |          |          |          |
| 2h  | 2.35E-07  | 7.55E-07 | 5.14E-06 | 4.09E-07 |
| 6h  | 1.07E-06  | 1.02E-06 | 1.23E-06 | 1.33E-06 |
| 12h | 2.36E-07  | 3.00E-07 | 2.24E-07 | 4.44E-07 |
| 24h | 9.61E-07  | 2.26E-07 | 6.04E-07 | 3.60E-06 |
| 36h | 5.05E-07  | 3.58E-07 | 5.16E-07 | 6.73E-07 |
| 48h | 4.51E-07  | 7.55E-08 | 6.71E-08 | 4.39E-07 |
| 72h | 2.81E-07  | 2.24E-07 | 4.13E-07 | 4.57E-07 |
|     | cgd1_2280 |          |          |          |
| 2h  | 1.90E-05  | 0.00E+00 | 2.09E-05 | 0.00E+00 |
| 6h  | 1.84E-05  | 7.12E-06 | 2.15E-05 | 0.00E+00 |
| 12h | 8.45E-06  | 2.57E-06 | 1.67E-05 | 0.00E+00 |
| 24h | 1.61E-06  | 2.94E-06 | 1.12E-06 | 3.16E-05 |
| 36h | 4.64E-06  | 2.67E-06 | 5.55E-06 | 1.01E-05 |
| 48h | 2.35E-06  | 1.51E-06 | 1.47E-06 | 2.07E-05 |
| 72h | 4.47E-06  | 1.87E-06 | 3.82E-06 | 1.13E-04 |
|     | cgd1_2290 |          |          |          |
| 2h  | 5.57E-09  | 3.40E-08 | 4.09E-07 | 0.00E+00 |
| 6h  | 3.66E-07  | 3.93E-07 | 4.58E-07 | 4.27E-07 |
| 12h | 2.21E-06  | 3.86E-06 | 1.48E-05 | 2.02E-06 |
| 24h | 1.10E-06  | 6.07E-07 | 5.04E-07 | 3.36E-06 |
| 36h | 2.49E-06  | 4.17E-06 | 3.22E-06 | 5.40E-06 |
| 48h | 4.68E-07  | 1.08E-06 | 4.53E-07 | 2.04E-06 |
| 72h | 7.52E-07  | 4.29E-07 | 2.02E-07 | 4.47E-07 |
|     | cgd1_2300 |          |          |          |
| 2h  | 1.14E-06  | 2.07E-06 | 3.32E-06 | 5.21E-06 |
| 6h  | 4.24E-07  | 6.12E-07 | 5.55E-06 | 4.91E-07 |
| 12h | 1.99E-06  | 5.25E-06 | 9.39E-06 | 3.34E-06 |
| 24h | 1.38E-06  | 5.83E-07 | 6.14E-07 | 3.21E-06 |
| 36h | 9.22E-07  | 1.99E-06 | 9.48E-07 | 3.09E-06 |
| 48h | 2.62E-07  | 3.49E-07 | 2.71E-07 | 7.30E-07 |
| 72h | 2.32E-07  | 1.69E-07 | 1.55E-07 | 3.51E-07 |
|     | cgd1_2320 |          |          |          |
| 2h  | 9.45E-08  | 6.13E-08 | 6.48E-07 | 9.00E-09 |
| 6h  | 1.65E-08  | 2.00E-08 | 2.98E-08 | 0.00E+00 |
| 12h | 1.29E-05  | 7.36E-06 | 6.00E-05 | 6.84E-06 |
| 24h | 1.33E-06  | 7.12E-07 | 1.86E-06 | 6.91E-06 |
| 36h | 1.69E-05  | 1.02E-05 | 2.41E-06 | 1.52E-05 |
| 48h | 4.32E-06  | 4.42E-06 | 4.19E-06 | 9.14E-06 |
| 72h | 1.21E-06  | 2.88E-07 | 1.93E-07 | 3.28E-07 |
|     | cgd1_2330 |          |          |          |
| 2h  | 0.00E+00  | 1.08E-07 | 6.12E-07 | 1.09E-08 |
| 6h  | 1.16E-07  | 2.76E-07 | 1.91E-07 | 1.20E-07 |
| 12h | 3.58E-08  | 2.93E-08 | 6.39E-07 | 3.76E-08 |
| 24h | 4.89E-08  | 1.34E-07 | 4.65E-08 | 5.93E-07 |
| 36h | 4.91E-07  | 3.52E-07 | 3.03E-07 | 3.73E-07 |



|     |           |          |          |          |
|-----|-----------|----------|----------|----------|
| 48h | 3.37E-07  | 3.42E-07 | 3.02E-07 | 5.02E-07 |
| 72h | 2.60E-07  | 9.47E-08 | 1.40E-07 | 1.62E-07 |
|     | cgd1_2350 |          |          |          |
| 2h  | 2.46E-06  | 5.04E-06 | 6.78E-06 | 6.69E-06 |
| 6h  | 2.50E-06  | 2.21E-06 | 6.54E-06 | 2.70E-05 |
| 12h | 2.71E-06  | 3.10E-06 | 1.29E-05 | 1.30E-05 |
| 24h | 2.33E-06  | 4.23E-06 | 4.73E-06 | 6.27E-05 |
| 36h | 3.68E-06  | 1.67E-06 | 1.48E-06 | 1.06E-05 |
| 48h | 2.94E-06  | 3.56E-06 | 1.84E-06 | 1.73E-05 |
| 72h | 6.77E-07  | 6.63E-07 | 4.27E-07 | 1.76E-06 |
|     | cgd1_2360 |          |          |          |
| 2h  | 6.03E-07  | 7.00E-07 | 5.00E-06 | 4.98E-07 |
| 6h  | 6.17E-07  | 1.23E-06 | 4.48E-06 | 6.38E-07 |
| 12h | 2.54E-07  | 3.08E-07 | 3.67E-07 | 1.39E-07 |
| 24h | 6.08E-07  | 1.83E-06 | 3.26E-07 | 3.86E-06 |
| 36h | 1.34E-06  | 5.28E-07 | 3.47E-07 | 5.89E-07 |
| 48h | 1.30E-06  | 7.75E-07 | 6.17E-07 | 7.32E-07 |
| 72h | 2.54E-07  | 6.94E-08 | 8.16E-08 | 7.63E-08 |
|     | cgd1_2370 |          |          |          |
| 2h  | 7.56E-07  | 3.94E-07 | 2.64E-06 | 3.59E-08 |
| 6h  | 6.42E-07  | 6.95E-07 | 2.03E-05 | 7.34E-05 |
| 12h | 2.49E-07  | 2.80E-07 | 0.00E+00 | 2.81E-06 |
| 24h | 2.42E-06  | 2.27E-06 | 2.40E-06 | 8.30E-05 |
| 36h | 6.93E-06  | 1.32E-06 | 1.86E-06 | 4.63E-05 |
| 48h | 1.50E-05  | 2.76E-06 | 5.93E-05 | 4.85E-05 |
| 72h | 1.69E-06  | 1.06E-06 | 6.43E-06 | 6.73E-05 |
|     | cgd1_2400 |          |          |          |
| 2h  | 9.32E-04  | 7.48E-03 | 5.13E-03 | 4.28E-04 |
| 6h  | 1.75E-04  | 3.79E-04 | 2.51E-04 | 2.83E-04 |
| 12h | 1.15E-04  | 5.75E-04 | 5.09E-04 | 9.10E-04 |
| 24h | 8.36E-04  | 1.78E-03 | 9.29E-04 | 3.31E-04 |
| 36h | 1.14E-04  | 7.71E-04 | 5.35E-04 | 1.42E-04 |
| 48h | 2.63E-04  | 3.14E-04 | 3.41E-04 | 1.57E-04 |
| 72h | 1.97E-05  | 1.15E-04 | 8.06E-05 | 3.25E-05 |
|     | cgd1_2420 |          |          |          |
| 2h  | 8.34E-06  | 7.75E-06 | 3.16E-05 | 1.49E-05 |
| 6h  | 1.66E-05  | 8.51E-06 | 6.43E-06 | 2.88E-05 |
| 12h | 1.65E-06  | 1.22E-05 | 2.77E-05 | 1.15E-05 |
| 24h | 1.31E-05  | 2.90E-05 | 4.56E-05 | 2.18E-05 |
| 36h | 3.39E-06  | 1.52E-05 | 1.72E-05 | 3.93E-06 |
| 48h | 9.38E-06  | 1.04E-05 | 1.22E-05 | 7.06E-06 |
| 72h | 2.15E-06  | 8.42E-06 | 1.16E-05 | 2.89E-06 |
|     | cgd1_2430 |          |          |          |
| 2h  | 4.77E-07  | 5.33E-07 | 2.48E-06 | 2.40E-06 |
| 6h  | 8.17E-07  | 6.23E-07 | 1.06E-06 | 6.07E-06 |
| 12h | 1.17E-07  | 3.88E-07 | 3.41E-07 | 1.63E-06 |
| 24h | 1.48E-06  | 1.52E-06 | 2.07E-06 | 2.39E-06 |
| 36h | 5.41E-07  | 9.57E-07 | 1.31E-06 | 8.77E-07 |
| 48h | 1.21E-06  | 8.59E-07 | 5.37E-07 | 6.58E-07 |
| 72h | 1.75E-07  | 3.77E-06 | 3.96E-07 | 6.69E-08 |
|     | cgd1_2460 |          |          |          |
| 2h  | 5.69E-06  | 2.56E-06 | 2.22E-06 | 6.26E-06 |
| 6h  | 3.93E-06  | 1.16E-06 | 1.06E-06 | 2.93E-06 |

|     |           |          |          |          |
|-----|-----------|----------|----------|----------|
| 12h | 1.10E-06  | 6.69E-06 | 1.70E-06 | 1.22E-05 |
| 24h | 3.06E-06  | 3.30E-06 | 2.78E-06 | 3.15E-06 |
| 36h | 1.43E-06  | 2.35E-06 | 2.32E-06 | 5.38E-06 |
| 48h | 2.22E-06  | 1.29E-06 | 1.49E-06 | 2.36E-06 |
| 72h | 6.90E-07  | 6.30E-07 | 6.56E-07 | 1.24E-06 |
|     | cgd1_2470 |          |          |          |
| 2h  | 1.01E-06  | 2.23E-06 | 1.69E-06 | 1.33E-06 |
| 6h  | 6.99E-07  | 5.66E-07 | 1.62E-06 | 1.14E-06 |
| 12h | 5.23E-08  | 6.80E-08 | 1.12E-07 | 1.07E-06 |
| 24h | 5.69E-07  | 2.32E-06 | 1.62E-06 | 5.15E-07 |
| 36h | 4.86E-07  | 9.73E-07 | 2.45E-06 | 1.86E-06 |
| 48h | 5.34E-07  | 7.81E-07 | 9.77E-07 | 4.38E-07 |
| 72h | 3.06E-07  | 6.80E-07 | 3.21E-06 | 3.43E-07 |
|     | cgd1_2490 |          |          |          |
| 2h  | 4.68E-06  | 5.39E-05 | 2.65E-06 | 1.50E-07 |
| 6h  | 3.16E-05  | 2.63E-04 | 3.80E-04 | 1.15E-04 |
| 12h | 3.27E-06  | 1.61E-04 | 6.26E-05 | 2.24E-05 |
| 24h | 6.42E-06  | 1.96E-04 | 5.37E-04 | 6.35E-05 |
| 36h | 2.87E-05  | 3.83E-04 | 3.17E-04 | 9.35E-05 |
| 48h | 1.48E-05  | 1.55E-04 | 1.39E-04 | 3.78E-05 |
| 72h | 7.62E-06  | 6.22E-05 | 6.18E-05 | 4.37E-06 |
|     | cgd1_2510 |          |          |          |
| 2h  | 3.09E-07  | 1.27E-07 | 3.93E-07 | 3.22E-08 |
| 6h  | 5.75E-07  | 3.76E-07 | 1.61E-07 | 1.81E-06 |
| 12h | 1.75E-07  | 5.68E-07 | 8.97E-07 | 3.46E-06 |
| 24h | 2.99E-07  | 1.23E-06 | 9.73E-07 | 8.50E-07 |
| 36h | 7.89E-07  | 9.11E-07 | 1.53E-06 | 2.56E-06 |
| 48h | 1.19E-07  | 4.02E-07 | 5.45E-07 | 3.49E-07 |
| 72h | 8.92E-07  | 5.37E-07 | 4.53E-07 | 3.98E-07 |
|     | cgd1_2530 |          |          |          |
| 2h  | 3.12E-08  | 7.15E-08 | 7.45E-08 | 1.11E-07 |
| 6h  | 1.93E-07  | 1.88E-07 | 1.36E-07 | 2.59E-07 |
| 12h | 1.59E-06  | 3.67E-06 | 5.58E-06 | 1.60E-05 |
| 24h | 6.12E-07  | 4.15E-06 | 2.08E-06 | 1.92E-06 |
| 36h | 2.71E-06  | 3.20E-06 | 9.17E-06 | 1.19E-05 |
| 48h | 1.49E-06  | 2.08E-06 | 2.34E-06 | 2.53E-06 |
| 72h | 2.80E-06  | 9.47E-07 | 2.01E-06 | 1.13E-06 |
|     | cgd1_2540 |          |          |          |
| 2h  | 8.88E-09  | 6.87E-09 | 4.68E-08 | 0.00E+00 |
| 6h  | 1.13E-08  | 2.90E-08 | 7.01E-08 | 1.66E-07 |
| 12h | 4.40E-07  | 4.64E-07 | 1.34E-06 | 5.47E-06 |
| 24h | 1.17E-07  | 8.92E-07 | 8.46E-07 | 3.69E-07 |
| 36h | 7.25E-07  | 3.03E-06 | 2.76E-06 | 2.45E-06 |
| 48h | 5.25E-07  | 8.10E-07 | 1.01E-06 | 1.31E-06 |
| 72h | 9.45E-07  | 7.82E-07 | 1.34E-06 | 8.70E-07 |
|     | cgd1_2580 |          |          |          |
| 2h  | 6.81E-09  | 2.96E-08 | 1.20E-08 | 0.00E+00 |
| 6h  | 1.89E-08  | 7.92E-09 | 7.17E-09 | 3.98E-08 |
| 12h | 1.52E-07  | 4.01E-08 | 1.96E-07 | 4.66E-07 |
| 24h | 2.72E-08  | 6.43E-08 | 8.03E-08 | 1.41E-07 |
| 36h | 1.38E-07  | 3.39E-07 | 4.00E-07 | 3.21E-07 |
| 48h | 1.17E-07  | 1.39E-07 | 8.63E-08 | 1.63E-07 |
| 72h | 1.08E-07  | 6.84E-08 | 7.87E-08 | 5.11E-09 |

|     |           |          |          |          |
|-----|-----------|----------|----------|----------|
|     | cgd1_2590 |          |          |          |
| 2h  | 4.01E-07  | 1.31E-07 | 7.32E-07 | 1.14E-07 |
| 6h  | 5.02E-07  | 5.14E-07 | 6.17E-07 | 3.70E-06 |
| 12h | 2.60E-07  | 2.56E-07 | 3.70E-07 | 2.36E-06 |
| 24h | 3.67E-07  | 4.06E-07 | 1.32E-06 | 4.02E-06 |
| 36h | 9.53E-07  | 8.27E-07 | 1.52E-06 | 1.41E-06 |
| 48h | 8.97E-07  | 5.76E-07 | 7.74E-07 | 1.02E-06 |
| 72h | 2.40E-07  | 2.41E-07 | 3.19E-07 | 1.85E-07 |
|     | cgd1_2600 |          |          |          |
| 2h  | 7.30E-06  | 2.07E-05 | 1.09E-04 | 6.21E-06 |
| 6h  | 1.56E-06  | 5.21E-06 | 3.45E-06 | 1.88E-05 |
| 12h | 2.13E-06  | 2.63E-06 | 8.96E-06 | 5.65E-06 |
| 24h | 2.44E-06  | 9.75E-06 | 2.77E-05 | 2.15E-05 |
| 36h | 6.52E-06  | 2.14E-05 | 2.19E-05 | 1.05E-05 |
| 48h | 1.49E-06  | 8.22E-06 | 6.87E-06 | 3.17E-06 |
| 72h | 3.92E-07  | 1.18E-05 | 4.95E-06 | 1.26E-06 |
|     | cgd1_3750 |          |          |          |
| 2h  | 3.78E-07  | 1.55E-06 | 3.87E-07 | 1.75E-06 |
| 6h  | 5.99E-06  | 9.24E-06 | 1.86E-05 | 9.12E-06 |
| 12h | 1.65E-08  | 3.67E-08 | 1.44E-06 | 1.54E-07 |
| 24h | 1.19E-06  | 1.04E-05 | 1.83E-05 | 1.26E-06 |
| 36h | 4.02E-07  | 2.52E-06 | 3.81E-06 | 3.70E-07 |
| 48h | 1.57E-06  | 3.05E-06 | 5.54E-06 | 4.35E-07 |
| 72h | 1.31E-07  | 7.82E-07 | 6.73E-07 | 5.86E-08 |
|     | cgd1_3790 |          |          |          |
| 2h  | 1.48E-04  | 1.09E-04 | 7.01E-05 | 4.07E-06 |
| 6h  | 1.39E-05  | 3.80E-05 | 1.67E-05 | 4.01E-05 |
| 12h | 1.54E-02  | 1.76E-03 | 5.38E-04 | 3.89E-03 |
| 24h | 1.80E-03  | 9.02E-04 | 5.55E-04 | 2.74E-04 |
| 36h | 1.42E-03  | 7.49E-04 | 9.81E-04 | 1.60E-03 |
| 48h | 7.25E-04  | 3.08E-04 | 1.40E-04 | 2.93E-04 |
| 72h | 2.20E-04  | 1.42E-04 | 2.80E-05 | 4.69E-05 |
|     | cgd1_3820 |          |          |          |
| 2h  | 1.58E-06  | 1.20E-06 | 3.24E-06 | 1.38E-06 |
| 6h  | 5.24E-07  | 2.03E-06 | 6.09E-07 | 1.39E-06 |
| 12h | 1.11E-06  | 1.17E-06 | 2.19E-05 | 4.06E-06 |
| 24h | 1.82E-06  | 6.24E-06 | 2.06E-05 | 2.96E-06 |
| 36h | 4.41E-06  | 1.08E-05 | 3.90E-05 | 1.76E-05 |
| 48h | 2.80E-06  | 3.85E-06 | 1.19E-05 | 2.62E-06 |
| 72h | 1.73E-06  | 1.65E-06 | 3.68E-06 | 4.74E-07 |
|     | cgd1_3830 |          |          |          |
| 2h  | 5.38E-09  | 8.55E-10 | 2.73E-09 | 8.78E-08 |
| 6h  | 2.55E-08  | 0.00E+00 | 0.00E+00 | 2.13E-09 |
| 12h | 2.71E-09  | 0.00E+00 | 5.65E-10 | 3.70E-09 |
| 24h | 6.09E-09  | 4.60E-09 | 1.98E-09 | 4.15E-09 |
| 36h | 2.36E-08  | 2.27E-08 | 3.01E-08 | 1.94E-08 |
| 48h | 1.37E-07  | 2.65E-07 | 2.25E-07 | 2.37E-07 |
| 72h | 6.76E-08  | 3.35E-08 | 4.04E-09 | 3.01E-09 |
|     | cgd1_3840 |          |          |          |
| 2h  | 2.08E-06  | 5.70E-06 | 2.01E-05 | 9.40E-06 |
| 6h  | 3.91E-06  | 4.60E-06 | 1.02E-06 | 6.74E-06 |
| 12h | 5.30E-06  | 2.54E-06 | 8.57E-06 | 4.32E-06 |
| 24h | 3.30E-06  | 7.08E-06 | 1.67E-05 | 4.63E-06 |

|     |          |          |          |          |
|-----|----------|----------|----------|----------|
| 36h | 2.16E-06 | 5.60E-06 | 6.45E-06 | 1.92E-06 |
| 48h | 1.22E-06 | 7.35E-06 | 6.10E-06 | 2.39E-06 |
| 72h | 1.76E-06 | 1.02E-06 | 4.11E-07 | 1.54E-07 |
|     | cgd5_280 |          |          |          |
| 2h  | 8.81E-09 | 1.02E-08 | 5.79E-09 | 0.00E+00 |
| 6h  | 2.08E-08 | 1.08E-08 | 6.54E-09 | 1.09E-08 |
| 12h | 1.70E-07 | 1.64E-08 | 8.66E-09 | 1.03E-07 |
| 24h | 8.47E-08 | 1.76E-07 | 3.46E-07 | 2.41E-07 |
| 36h | 3.69E-07 | 2.26E-07 | 2.60E-07 | 2.16E-07 |
| 48h | 3.21E-07 | 4.29E-07 | 2.77E-07 | 4.91E-07 |
| 72h | 4.43E-07 | 1.94E-07 | 1.04E-07 | 8.38E-08 |
|     | cgd5_290 |          |          |          |
| 2h  | 2.68E-04 | 4.27E-03 | 1.42E-03 | 1.73E-04 |
| 6h  | 1.68E-04 | 7.97E-04 | 1.23E-03 | 6.80E-04 |
| 12h | 3.20E-05 | 1.02E-04 | 1.11E-03 | 8.77E-05 |
| 24h | 1.66E-04 | 5.67E-04 | 2.80E-03 | 1.94E-04 |
| 36h | 6.23E-05 | 1.24E-03 | 7.10E-04 | 4.40E-05 |
| 48h | 5.29E-05 | 2.57E-04 | 5.01E-04 | 6.91E-05 |
| 72h | 3.62E-05 | 2.21E-04 | 7.06E-05 | 5.92E-06 |
|     | cgd5_410 |          |          |          |
| 2h  | 0.00E+00 | 0.00E+00 | 0.00E+00 | 0.00E+00 |
| 6h  | 0.00E+00 | 0.00E+00 | 0.00E+00 | 1.52E-08 |
| 12h | 1.04E-06 | 5.29E-07 | 1.50E-05 | 9.77E-07 |
| 24h | 8.00E-07 | 7.35E-06 | 1.05E-04 | 1.33E-06 |
| 36h | 8.70E-06 | 4.19E-05 | 6.72E-05 | 3.03E-06 |
| 48h | 5.46E-06 | 1.11E-05 | 4.08E-05 | 4.44E-06 |
| 72h | 7.84E-06 | 1.82E-05 | 3.12E-05 | 4.35E-06 |
|     | cgd5_420 |          |          |          |
| 2h  | 0.00E+00 | 0.00E+00 | 0.00E+00 | 0.00E+00 |
| 6h  | 0.00E+00 | 2.48E-07 | 0.00E+00 | 0.00E+00 |
| 12h | 1.22E-07 | 0.00E+00 | 9.72E-09 | 0.00E+00 |
| 24h | 5.55E-08 | 1.66E-06 | 3.58E-08 | 5.06E-08 |
| 36h | 2.06E-06 | 1.66E-05 | 9.45E-07 | 9.65E-07 |
| 48h | 6.44E-04 | 4.19E-04 | 8.70E-05 | 3.81E-05 |
| 72h | 9.95E-05 | 3.16E-04 | 5.89E-05 | 5.72E-05 |
|     | cgd5_450 |          |          |          |
| 2h  | 2.47E-06 | 1.19E-06 | 9.16E-07 | 1.63E-06 |
| 6h  | 3.50E-06 | 4.92E-07 | 6.08E-06 | 3.29E-06 |
| 12h | 1.59E-06 | 4.66E-07 | 1.22E-06 | 1.63E-06 |
| 24h | 2.32E-06 | 1.73E-06 | 1.58E-06 | 1.60E-06 |
| 36h | 6.02E-07 | 1.11E-06 | 7.17E-07 | 8.57E-07 |
| 48h | 5.77E-07 | 5.51E-07 | 5.53E-07 | 3.58E-07 |
| 72h | 2.75E-07 | 3.78E-07 | 2.49E-07 | 5.46E-07 |
|     | cgd5_490 |          |          |          |
| 2h  | 7.97E-08 | 2.39E-07 | 0.00E+00 | 2.72E-07 |
| 6h  | 1.18E-06 | 5.72E-07 | 4.44E-07 | 1.12E-06 |
| 12h | 9.69E-08 | 3.16E-08 | 3.14E-08 | 4.17E-08 |
| 24h | 2.69E-07 | 3.59E-07 | 6.13E-07 | 5.10E-07 |
| 36h | 4.28E-07 | 1.50E-06 | 2.28E-07 | 1.65E-07 |
| 48h | 1.28E-07 | 8.45E-07 | 1.55E-07 | 1.39E-07 |
| 72h | 2.37E-07 | 2.65E-07 | 8.80E-08 | 2.01E-07 |
|     | cgd5_510 |          |          |          |
| 2h  | 7.19E-05 | 2.81E-05 | 1.73E-06 | 5.59E-06 |

|     |          |          |          |          |          |
|-----|----------|----------|----------|----------|----------|
| 6h  |          | 4.22E-05 | 2.97E-05 | 4.30E-05 | 4.03E-05 |
| 12h |          | 2.25E-06 | 1.01E-06 | 2.91E-06 | 4.37E-06 |
| 24h |          | 6.01E-06 | 2.89E-05 | 1.30E-05 | 9.61E-06 |
| 36h |          | 5.87E-06 | 2.63E-05 | 5.54E-06 | 3.54E-06 |
| 48h |          | 2.99E-06 | 7.15E-06 | 2.01E-06 | 2.67E-06 |
| 72h |          | 8.72E-07 | 1.79E-06 | 2.06E-07 | 3.49E-07 |
|     | cgd5_520 |          |          |          |          |
| 2h  |          | 8.91E-06 | 1.12E-05 | 3.37E-06 | 5.25E-06 |
| 6h  |          | 2.57E-06 | 5.92E-06 | 1.04E-06 | 1.43E-06 |
| 12h |          | 8.17E-07 | 1.59E-07 | 2.56E-06 | 1.12E-06 |
| 24h |          | 8.11E-07 | 2.71E-06 | 7.76E-07 | 3.95E-07 |
| 36h |          | 9.19E-07 | 3.52E-06 | 1.61E-06 | 8.55E-07 |
| 48h |          | 1.75E-07 | 1.36E-06 | 2.09E-07 | 2.18E-07 |
| 72h |          | 2.68E-07 | 2.83E-07 | 2.04E-07 | 2.87E-07 |
|     | cgd5_530 |          |          |          |          |
| 2h  |          | 1.07E-06 | 2.87E-07 | 2.36E-07 | 1.11E-06 |
| 6h  |          | 2.81E-07 | 1.92E-07 | 7.89E-07 | 4.63E-07 |
| 12h |          | 3.76E-07 | 1.47E-07 | 1.72E-07 | 2.78E-07 |
| 24h |          | 2.93E-07 | 1.92E-07 | 2.82E-07 | 1.90E-07 |
| 36h |          | 4.65E-07 | 3.65E-07 | 3.73E-07 | 3.95E-07 |
| 48h |          | 1.58E-07 | 1.30E-07 | 1.25E-07 | 1.54E-07 |
| 72h |          | 1.49E-07 | 6.65E-08 | 5.99E-08 | 1.21E-07 |
|     | cgd5_550 |          |          |          |          |
| 2h  |          | 4.55E-05 | 9.14E-05 | 0.00E+00 | 5.67E-06 |
| 6h  |          | 4.46E-04 | 6.49E-04 | 6.69E-04 | 2.24E-04 |
| 12h |          | 4.72E-05 | 1.59E-04 | 4.32E-05 | 5.65E-05 |
| 24h |          | 8.83E-05 | 6.36E-04 | 1.50E-04 | 6.13E-05 |
| 36h |          | 1.56E-04 | 4.26E-04 | 1.62E-04 | 8.43E-05 |
| 48h |          | 8.82E-05 | 1.44E-04 | 0.00E+00 | 4.60E-05 |
| 72h |          | 8.70E-05 | 2.45E-04 | 9.23E-05 | 2.89E-05 |
|     | cgd5_560 |          |          |          |          |
| 2h  |          | 0.00E+00 | 0.00E+00 | 0.00E+00 | 0.00E+00 |
| 6h  |          | 0.00E+00 | 0.00E+00 | 0.00E+00 | 0.00E+00 |
| 12h |          | 9.98E-05 | 1.78E-04 | 9.74E-06 | 1.44E-05 |
| 24h |          | 7.42E-06 | 3.20E-05 | 5.58E-06 | 2.74E-06 |
| 36h |          | 7.13E-06 | 7.93E-05 | 2.14E-05 | 1.50E-05 |
| 48h |          | 1.91E-05 | 8.10E-05 | 2.71E-05 | 1.45E-05 |
| 72h |          | 3.66E-05 | 6.38E-05 | 2.98E-05 | 1.23E-05 |
|     | cgd5_580 |          |          |          |          |
| 2h  |          | 0.00E+00 | 0.00E+00 | 0.00E+00 | 0.00E+00 |
| 6h  |          | 0.00E+00 | 0.00E+00 | 0.00E+00 | 0.00E+00 |
| 12h |          | 0.00E+00 | 1.19E-07 | 5.32E-08 | 1.30E-07 |
| 24h |          | 1.67E-07 | 2.79E-07 | 9.37E-08 | 2.75E-08 |
| 36h |          | 1.35E-07 | 1.21E-06 | 2.07E-07 | 2.23E-07 |
| 48h |          | 8.03E-07 | 4.60E-06 | 8.36E-07 | 7.88E-07 |
| 72h |          | 2.35E-07 | 8.13E-07 | 3.10E-07 | 2.18E-07 |
|     | cgd5_600 |          |          |          |          |
| 2h  |          | 1.64E-07 | 3.99E-08 | 0.00E+00 | 3.71E-08 |
| 6h  |          | 0.00E+00 | 9.84E-09 | 0.00E+00 | 2.19E-09 |
| 12h |          | 4.86E-08 | 8.53E-08 | 3.15E-08 | 6.19E-08 |
| 24h |          | 1.01E-07 | 6.34E-08 | 1.68E-07 | 1.05E-07 |
| 36h |          | 1.02E-07 | 3.65E-07 | 9.42E-08 | 1.13E-07 |
| 48h |          | 1.88E-07 | 1.60E-07 | 1.50E-07 | 1.52E-07 |

|     |          |          |          |          |
|-----|----------|----------|----------|----------|
| 72h | 2.10E-08 | 1.04E-07 | 1.27E-08 | 4.38E-08 |
|     | cgd5_610 |          |          |          |
| 2h  | 5.35E-06 | 3.08E-06 | 8.37E-07 | 3.89E-06 |
| 6h  | 7.12E-06 | 2.76E-06 | 1.06E-05 | 8.44E-06 |
| 12h | 8.73E-07 | 2.85E-07 | 1.19E-06 | 1.44E-06 |
| 24h | 2.33E-06 | 3.15E-06 | 5.62E-06 | 3.83E-06 |
| 36h | 6.71E-07 | 5.59E-06 | 1.09E-06 | 1.16E-06 |
| 48h | 1.12E-06 | 1.70E-06 | 1.47E-06 | 9.18E-07 |
| 72h | 5.54E-08 | 2.46E-07 | 5.88E-08 | 1.15E-07 |
|     | cgd5_640 |          |          |          |
| 2h  | 7.58E-05 | 2.13E-04 | 7.75E-06 | 1.63E-05 |
| 6h  | 0.00E+00 | 4.27E-06 | 0.00E+00 | 5.14E-06 |
| 12h | 6.00E-05 | 3.95E-04 | 3.75E-04 | 4.38E-05 |
| 24h | 1.05E-04 | 2.73E-04 | 4.65E-04 | 2.34E-05 |
| 36h | 2.95E-04 | 2.48E-04 | 9.06E-04 | 1.25E-04 |
| 48h | 2.90E-04 | 2.40E-04 | 3.02E-03 | 1.16E-04 |
| 72h | 3.10E-04 | 1.48E-04 | 1.16E-03 | 1.79E-04 |
|     | cgd5_650 |          |          |          |
| 2h  | 2.94E-07 | 7.89E-07 | 3.63E-09 | 0.00E+00 |
| 6h  | 1.53E-07 | 7.98E-08 | 2.09E-07 | 6.47E-07 |
| 12h | 1.88E-06 | 2.13E-06 | 3.19E-06 | 4.91E-07 |
| 24h | 2.45E-06 | 1.36E-06 | 2.47E-06 | 1.15E-06 |
| 36h | 4.08E-07 | 8.45E-07 | 2.91E-06 | 1.78E-06 |
| 48h | 9.30E-07 | 2.25E-06 | 5.97E-07 | 1.54E-06 |
| 72h | 1.00E-07 | 2.95E-07 | 1.13E-07 | 1.25E-07 |
|     | cgd5_660 |          |          |          |
| 2h  | 1.46E-07 | 3.67E-08 | 0.00E+00 | 3.26E-08 |
| 6h  | 4.53E-07 | 4.28E-08 | 4.46E-08 | 1.47E-07 |
| 12h | 3.81E-08 | 4.05E-09 | 6.60E-08 | 1.27E-08 |
| 24h | 8.62E-08 | 1.29E-07 | 1.75E-07 | 1.41E-07 |
| 36h | 6.56E-08 | 6.13E-08 | 1.35E-07 | 7.69E-08 |
| 48h | 1.39E-07 | 1.01E-07 | 5.36E-08 | 1.40E-07 |
| 72h | 4.90E-08 | 4.72E-08 | 3.19E-08 | 3.04E-08 |
|     | cgd5_670 |          |          |          |
| 2h  | 5.57E-06 | 6.71E-06 | 8.31E-06 | 6.30E-06 |
| 6h  | 7.31E-06 | 2.07E-06 | 4.47E-06 | 6.14E-06 |
| 12h | 3.19E-07 | 4.08E-07 | 4.18E-06 | 4.59E-07 |
| 24h | 4.19E-06 | 1.20E-05 | 1.87E-05 | 4.94E-06 |
| 36h | 6.86E-07 | 2.48E-06 | 3.45E-06 | 1.39E-06 |
| 48h | 1.19E-06 | 7.92E-07 | 8.35E-07 | 2.04E-06 |
| 72h | 4.39E-07 | 3.89E-07 | 1.23E-06 | 1.17E-05 |
|     | cgd5_680 |          |          |          |
| 2h  | 1.53E-05 | 1.00E-05 | 1.67E-06 | 1.28E-05 |
| 6h  | 4.42E-05 | 9.79E-06 | 2.07E-05 | 5.77E-05 |
| 12h | 2.52E-06 | 1.30E-06 | 2.10E-05 | 2.76E-06 |
| 24h | 1.08E-05 | 1.16E-05 | 4.28E-05 | 1.96E-05 |
| 36h | 5.82E-06 | 9.19E-06 | 9.26E-06 | 1.38E-05 |
| 48h | 2.82E-06 | 4.65E-06 | 3.29E-06 | 8.75E-06 |
| 72h | 4.46E-06 | 7.64E-07 | 1.27E-06 | 4.85E-06 |
|     | cgd5_690 |          |          |          |
| 2h  | 1.44E-07 | 0.00E+00 | 3.64E-08 | 1.19E-07 |
| 6h  | 3.16E-07 | 2.53E-08 | 7.56E-08 | 8.56E-08 |
| 12h | 8.64E-07 | 1.25E-06 | 5.79E-07 | 1.13E-07 |

|     |          |          |          |          |
|-----|----------|----------|----------|----------|
| 24h | 5.42E-07 | 4.09E-07 | 1.38E-06 | 3.68E-07 |
| 36h | 1.03E-06 | 1.11E-06 | 7.44E-07 | 9.38E-07 |
| 48h | 6.65E-07 | 7.31E-07 | 6.28E-07 | 8.34E-07 |
| 72h | 1.57E-06 | 2.96E-07 | 1.33E-07 | 5.95E-07 |
|     | cgd5_700 |          |          |          |
| 2h  | 3.10E-02 | 5.16E-03 | 1.23E-04 | 3.92E-03 |
| 6h  | 2.51E-02 | 5.48E-03 | 4.05E-03 | 5.06E-03 |
| 12h | 2.01E-02 | 7.88E-03 | 2.34E-03 | 5.95E-04 |
| 24h | 1.05E-02 | 4.33E-03 | 5.66E-03 | 7.76E-03 |
| 36h | 8.92E-03 | 3.43E-03 | 9.17E-04 | 7.87E-03 |
| 48h | 5.53E-03 | 1.80E-03 | 5.71E-04 | 2.93E-03 |
| 72h | 2.70E-03 | 4.84E-04 | 1.56E-04 | 8.36E-04 |
|     | cgd5_710 |          |          |          |
| 2h  | 1.56E-07 | 1.40E-07 | 2.85E-08 | 1.48E-07 |
| 6h  | 9.05E-07 | 6.24E-07 | 5.11E-07 | 1.46E-06 |
| 12h | 2.58E-07 | 2.51E-07 | 6.75E-07 | 1.05E-07 |
| 24h | 2.89E-07 | 6.66E-07 | 4.58E-06 | 2.42E-06 |
| 36h | 2.10E-06 | 1.62E-06 | 1.84E-06 | 2.40E-06 |
| 48h | 6.76E-06 | 4.05E-06 | 1.95E-05 | 1.83E-05 |
| 72h | 1.70E-05 | 1.40E-05 | 1.07E-05 | 1.65E-05 |
|     | cgd5_720 |          |          |          |
| 2h  | 1.53E-03 | 3.10E-05 | 6.53E-06 | 7.14E-04 |
| 6h  | 7.85E-03 | 4.64E-05 | 1.41E-05 | 5.33E-05 |
| 12h | 1.64E-03 | 2.24E-05 | 4.46E-05 | 2.94E-05 |
| 24h | 1.50E-03 | 7.17E-05 | 2.84E-05 | 4.77E-05 |
| 36h | 1.35E-03 | 6.38E-05 | 6.42E-06 | 1.26E-04 |
| 48h | 1.07E-03 | 1.69E-05 | 8.32E-06 | 8.23E-05 |
| 72h | 1.18E-03 | 6.34E-05 | 6.89E-06 | 5.87E-05 |
|     | cgd5_730 |          |          |          |
| 2h  | 4.30E-05 | 1.42E-05 | 3.65E-06 | 2.19E-05 |
| 6h  | 3.66E-06 | 2.38E-06 | 3.16E-06 | 8.74E-06 |
| 12h | 2.77E-05 | 4.90E-06 | 3.33E-05 | 2.31E-06 |
| 24h | 2.31E-05 | 8.63E-06 | 3.55E-05 | 3.48E-03 |
| 36h | 1.02E-05 | 1.06E-05 | 8.44E-06 | 1.43E-05 |
| 48h | 6.68E-06 | 3.66E-06 | 4.09E-06 | 5.52E-06 |
| 72h | 2.11E-06 | 1.81E-06 | 1.05E-06 | 1.73E-06 |
|     | cgd5_740 |          |          |          |
| 2h  | 0.00E+00 | 5.19E-08 | 0.00E+00 | 0.00E+00 |
| 6h  | 5.68E-08 | 3.05E-08 | 2.65E-08 | 6.13E-08 |
| 12h | 1.71E-08 | 2.73E-09 | 2.03E-08 | 6.20E-09 |
| 24h | 7.96E-08 | 2.88E-08 | 3.48E-07 | 1.28E-07 |
| 36h | 2.80E-07 | 1.22E-07 | 1.04E-07 | 1.50E-07 |
| 48h | 2.13E-07 | 1.53E-07 | 4.70E-08 | 3.52E-07 |
| 72h | 4.88E-08 | 8.80E-08 | 4.21E-08 | 2.61E-08 |
|     | cgd5_750 |          |          |          |
| 2h  | 2.90E-06 | 1.37E-06 | 7.64E-07 | 1.62E-06 |
| 6h  | 2.89E-07 | 5.98E-08 | 4.72E-07 | 2.44E-07 |
| 12h | 1.12E-05 | 3.38E-06 | 9.17E-06 | 1.20E-06 |
| 24h | 4.02E-06 | 7.60E-07 | 3.69E-06 | 1.67E-06 |
| 36h | 1.76E-06 | 1.14E-06 | 2.32E-06 | 2.65E-06 |
| 48h | 3.99E-06 | 1.56E-06 | 4.45E-07 | 2.57E-06 |
| 72h | 2.00E-07 | 4.89E-07 | 2.83E-07 | 3.90E-07 |
|     | cgd5_760 |          |          |          |

|     |          |          |          |          |
|-----|----------|----------|----------|----------|
| 2h  | 2.71E-07 | 5.97E-07 | 0.00E+00 | 9.09E-08 |
| 6h  | 3.00E-08 | 3.54E-08 | 6.03E-08 | 6.05E-08 |
| 12h | 5.18E-07 | 1.32E-07 | 4.70E-07 | 6.32E-08 |
| 24h | 1.03E-07 | 5.17E-08 | 2.83E-07 | 8.74E-08 |
| 36h | 3.18E-07 | 1.78E-07 | 3.10E-07 | 3.94E-07 |
| 48h | 1.80E-06 | 9.87E-07 | 3.19E-07 | 1.24E-06 |
| 72h | 1.58E-07 | 1.56E-07 | 5.17E-07 | 1.41E-07 |
|     | cgd5_770 |          |          |          |
| 2h  | 3.98E-07 | 2.73E-06 | 1.77E-07 | 4.21E-06 |
| 6h  | 8.25E-08 | 3.33E-07 | 1.82E-06 | 1.40E-06 |
| 12h | 0.00E+00 | 0.00E+00 | 4.59E-07 | 5.79E-08 |
| 24h | 1.30E-07 | 1.09E-07 | 4.33E-07 | 2.32E-06 |
| 36h | 6.35E-07 | 6.57E-08 | 4.66E-07 | 4.67E-06 |
| 48h | 1.30E-05 | 5.90E-06 | 5.95E-06 | 2.53E-05 |
| 72h | 6.82E-07 | 6.38E-07 | 3.21E-07 | 2.53E-06 |
|     | cgd5_780 |          |          |          |
| 2h  | 0.00E+00 | 0.00E+00 | 0.00E+00 | 0.00E+00 |
| 6h  | 0.00E+00 | 0.00E+00 | 0.00E+00 | 0.00E+00 |
| 12h | 1.21E-06 | 8.34E-07 | 5.57E-06 | 5.54E-07 |
| 24h | 1.38E-06 | 4.10E-07 | 2.21E-06 | 6.05E-06 |
| 36h | 6.95E-07 | 6.21E-07 | 3.12E-06 | 1.13E-05 |
| 48h | 1.39E-06 | 6.24E-07 | 9.35E-07 | 1.24E-05 |
| 72h | 2.75E-06 | 2.90E-06 | 5.41E-06 | 1.55E-05 |
|     | cgd5_790 |          |          |          |
| 2h  | 0.00E+00 | 0.00E+00 | 0.00E+00 | 0.00E+00 |
| 6h  | 0.00E+00 | 0.00E+00 | 0.00E+00 | 0.00E+00 |
| 12h | 0.00E+00 | 0.00E+00 | 0.00E+00 | 0.00E+00 |
| 24h | 2.20E-07 | 1.75E-08 | 2.44E-08 | 1.36E-06 |
| 36h | 7.16E-07 | 8.58E-08 | 5.76E-07 | 1.56E-06 |
| 48h | 6.57E-06 | 9.64E-07 | 1.77E-06 | 7.74E-06 |
| 72h | 1.29E-05 | 3.33E-06 | 2.99E-06 | 2.03E-05 |
|     | cgd5_800 |          |          |          |
| 2h  | 4.12E-06 | 3.95E-06 | 9.48E-07 | 2.14E-06 |
| 6h  | 1.11E-06 | 7.07E-07 | 5.17E-07 | 1.71E-06 |
| 12h | 1.11E-06 | 1.18E-06 | 4.47E-06 | 2.20E-07 |
| 24h | 2.16E-06 | 6.76E-07 | 1.30E-06 | 2.77E-06 |
| 36h | 1.00E-06 | 5.97E-07 | 1.42E-06 | 1.73E-06 |
| 48h | 3.90E-07 | 1.66E-07 | 5.04E-07 | 1.37E-06 |
| 72h | 5.90E-07 | 7.67E-07 | 7.26E-07 | 2.30E-06 |
|     | cgd5_810 |          |          |          |
| 2h  | 0.00E+00 | 0.00E+00 | 0.00E+00 | 0.00E+00 |
| 6h  | 0.00E+00 | 0.00E+00 | 0.00E+00 | 0.00E+00 |
| 12h | 9.00E-09 | 3.81E-07 | 3.60E-07 | 1.14E-08 |
| 24h | 5.18E-08 | 6.60E-08 | 1.24E-07 | 1.21E-07 |
| 36h | 7.21E-08 | 1.45E-07 | 5.05E-07 | 3.59E-07 |
| 48h | 7.16E-08 | 9.18E-08 | 2.62E-07 | 4.52E-07 |
| 72h | 1.57E-07 | 1.09E-07 | 1.12E-07 | 1.17E-07 |
|     | cgd5_820 |          |          |          |
| 2h  | 1.48E-08 | 1.86E-08 | 0.00E+00 | 2.11E-09 |
| 6h  | 0.00E+00 | 0.00E+00 | 7.47E-09 | 5.49E-10 |
| 12h | 1.53E-05 | 2.84E-05 | 7.20E-06 | 4.10E-07 |
| 24h | 9.18E-07 | 1.01E-06 | 3.54E-07 | 3.76E-07 |
| 36h | 6.24E-07 | 2.40E-07 | 1.63E-06 | 8.60E-07 |



|     |           |          |          |          |
|-----|-----------|----------|----------|----------|
| 48h | 7.09E-07  | 4.99E-07 | 5.91E-07 | 5.23E-07 |
| 72h | 1.29E-07  | 1.12E-07 | 6.29E-08 | 1.27E-07 |
|     | cgd5_830  |          |          |          |
| 2h  | 1.46E-06  | 7.40E-06 | 2.25E-07 | 3.64E-05 |
| 6h  | 4.71E-06  | 1.66E-06 | 3.80E-06 | 1.09E-05 |
| 12h | 6.95E-07  | 9.73E-07 | 8.79E-07 | 7.60E-07 |
| 24h | 2.09E-06  | 1.25E-06 | 8.38E-06 | 3.48E-05 |
| 36h | 3.42E-06  | 7.34E-07 | 3.68E-06 | 2.39E-05 |
| 48h | 2.76E-06  | 9.56E-07 | 4.29E-06 | 1.36E-05 |
| 72h | 1.53E-06  | 6.60E-07 | 2.91E-07 | 3.32E-06 |
|     | cgd5_840  |          |          |          |
| 2h  | 1.57E-07  | 2.53E-07 | 1.06E-07 | 1.13E-07 |
| 6h  | 5.25E-07  | 6.65E-07 | 2.34E-06 | 8.83E-07 |
| 12h | 1.76E-07  | 2.57E-07 | 2.64E-07 | 1.19E-08 |
| 24h | 1.25E-07  | 3.00E-07 | 1.34E-06 | 8.42E-07 |
| 36h | 9.71E-07  | 1.35E-07 | 5.64E-07 | 1.84E-06 |
| 48h | 4.58E-07  | 7.78E-07 | 1.31E-06 | 9.86E-07 |
| 72h | 1.78E-07  | 8.84E-07 | 1.74E-07 | 2.57E-07 |
|     | cgd5_870  |          |          |          |
| 2h  | 1.10E-05  | 4.79E-06 | 4.23E-07 | 3.36E-05 |
| 6h  | 2.79E-05  | 2.46E-06 | 1.64E-05 | 2.11E-05 |
| 12h | 1.25E-07  | 1.36E-08 | 4.13E-06 | 5.65E-06 |
| 24h | 3.72E-06  | 8.70E-07 | 6.89E-06 | 8.02E-05 |
| 36h | 4.75E-06  | 1.33E-06 | 1.29E-05 | 2.06E-04 |
| 48h | 9.55E-06  | 2.45E-06 | 8.34E-06 | 9.82E-05 |
| 72h | 5.89E-06  | 1.12E-06 | 2.24E-06 | 1.25E-05 |
|     | cgd5_880  |          |          |          |
| 2h  | 2.31E-06  | 2.99E-06 | 4.91E-07 | 3.08E-06 |
| 6h  | 6.15E-07  | 1.64E-06 | 3.48E-06 | 1.55E-06 |
| 12h | 2.04E-07  | 6.57E-08 | 7.44E-07 | 1.24E-07 |
| 24h | 1.23E-06  | 1.10E-06 | 4.46E-06 | 2.53E-06 |
| 36h | 3.73E-07  | 7.93E-08 | 3.04E-07 | 8.71E-07 |
| 48h | 6.99E-07  | 1.99E-07 | 4.83E-07 | 1.15E-06 |
| 72h | 4.79E-08  | 5.80E-08 | 7.97E-08 | 1.26E-07 |
|     | cgd5_890  |          |          |          |
| 2h  | 1.15E-08  | 0.00E+00 | 0.00E+00 | 0.00E+00 |
| 6h  | 6.86E-08  | 1.02E-07 | 4.55E-07 | 1.35E-07 |
| 12h | 2.50E-08  | 0.00E+00 | 3.22E-08 | 2.37E-09 |
| 24h | 8.47E-08  | 7.26E-08 | 4.40E-07 | 3.06E-07 |
| 36h | 1.37E-07  | 4.45E-08 | 1.05E-07 | 3.57E-07 |
| 48h | 1.34E-07  | 1.06E-07 | 1.33E-07 | 1.70E-07 |
| 72h | 2.18E-08  | 1.23E-08 | 1.66E-08 | 1.05E-07 |
|     | cgd5_900  |          |          |          |
| 2h  | 2.09E-06  | 3.54E-06 | 1.04E-05 | 7.95E-07 |
| 6h  | 5.58E-07  | 6.36E-07 | 3.53E-06 | 7.28E-07 |
| 12h | 1.01E-06  | 5.47E-08 | 4.97E-07 | 6.30E-08 |
| 24h | 9.99E-07  | 6.81E-07 | 1.59E-06 | 1.23E-06 |
| 36h | 1.05E-06  | 1.37E-07 | 4.76E-07 | 1.27E-06 |
| 48h | 6.68E-07  | 1.93E-07 | 5.50E-07 | 5.85E-07 |
| 72h | 1.45E-07  | 1.92E-07 | 8.04E-07 | 3.38E-07 |
|     | cgd5_1250 |          |          |          |
| 2h  | 2.16E-08  | 1.30E-08 | 8.22E-08 | 0.00E+00 |
| 6h  | 6.34E-07  | 1.19E-06 | 1.42E-06 | 4.29E-07 |

|     |           |          |          |          |
|-----|-----------|----------|----------|----------|
| 12h | 4.35E-07  | 2.96E-07 | 3.59E-07 | 1.13E-06 |
| 24h | 2.34E-07  | 2.99E-07 | 3.68E-07 | 1.25E-06 |
| 36h | 2.52E-07  | 2.35E-06 | 8.70E-07 | 1.82E-06 |
| 48h | 3.62E-07  | 1.83E-07 | 2.15E-07 | 8.11E-07 |
| 72h | 6.65E-08  | 1.28E-07 | 9.65E-08 | 1.81E-07 |
|     | cgd5_1260 |          |          |          |
| 2h  | 8.44E-06  | 5.04E-06 | 2.51E-06 | 1.71E-06 |
| 6h  | 4.93E-05  | 1.89E-05 | 1.20E-05 | 5.04E-05 |
| 12h | 3.96E-07  | 2.74E-07 | 1.18E-06 | 1.13E-06 |
| 24h | 6.55E-06  | 8.00E-06 | 1.18E-05 | 5.41E-05 |
| 36h | 5.13E-06  | 2.92E-06 | 7.33E-06 | 1.57E-05 |
| 48h | 4.25E-06  | 3.98E-06 | 2.62E-06 | 2.12E-05 |
| 72h | 1.22E-06  | 1.97E-06 | 1.02E-06 | 9.04E-06 |
|     | cgd5_1270 |          |          |          |
| 2h  | 1.58E-05  | 2.29E-05 | 1.46E-05 | 1.06E-05 |
| 6h  | 5.83E-05  | 3.88E-05 | 4.17E-05 | 1.14E-04 |
| 12h | 5.27E-06  | 3.64E-06 | 1.11E-05 | 2.43E-05 |
| 24h | 1.31E-05  | 1.16E-05 | 1.99E-05 | 9.39E-05 |
| 36h | 1.19E-05  | 6.62E-06 | 2.60E-05 | 3.23E-05 |
| 48h | 5.72E-06  | 5.31E-06 | 3.75E-06 | 2.62E-05 |
| 72h | 3.13E-06  | 1.87E-06 | 1.42E-06 | 5.81E-06 |
|     | cgd5_1280 |          |          |          |
| 2h  | 3.20E-07  | 2.56E-07 | 9.94E-07 | 5.85E-08 |
| 6h  | 9.17E-07  | 3.93E-07 | 3.03E-07 | 5.05E-07 |
| 12h | 2.58E-08  | 2.32E-08 | 9.41E-08 | 8.43E-08 |
| 24h | 6.24E-08  | 1.28E-07 | 2.28E-07 | 3.95E-07 |
| 36h | 2.92E-07  | 3.28E-07 | 5.90E-07 | 3.25E-07 |
| 48h | 1.09E-07  | 5.70E-08 | 8.83E-08 | 2.26E-07 |
| 72h | 8.07E-08  | 2.28E-07 | 4.27E-08 | 6.08E-08 |
|     | cgd5_1320 |          |          |          |
| 2h  | 5.45E-06  | 4.69E-06 | 1.07E-05 | 1.39E-05 |
| 6h  | 5.78E-06  | 9.98E-06 | 6.58E-06 | 5.00E-05 |
| 12h | 1.67E-06  | 4.25E-07 | 1.05E-05 | 1.28E-05 |
| 24h | 2.55E-06  | 1.34E-06 | 2.78E-06 | 1.65E-05 |
| 36h | 3.44E-06  | 3.62E-06 | 7.50E-06 | 9.89E-06 |
| 48h | 1.57E-06  | 8.89E-07 | 7.24E-07 | 3.48E-06 |
| 72h | 4.07E-07  | 6.64E-07 | 3.02E-07 | 6.97E-07 |
|     | cgd5_1340 |          |          |          |
| 2h  | 5.04E-04  | 2.31E-04 | 5.91E-04 | 9.90E-04 |
| 6h  | 9.05E-05  | 4.80E-05 | 7.13E-05 | 3.94E-04 |
| 12h | 9.33E-05  | 4.35E-05 | 1.79E-04 | 1.45E-03 |
| 24h | 1.18E-04  | 1.19E-04 | 5.18E-05 | 5.40E-04 |
| 36h | 1.02E-04  | 6.42E-05 | 1.01E-04 | 3.17E-04 |
| 48h | 8.07E-05  | 3.15E-05 | 3.66E-05 | 3.21E-04 |
| 72h | 3.31E-05  | 4.62E-05 | 1.87E-05 | 1.07E-04 |
|     | cgd5_1350 |          |          |          |
| 2h  | 1.81E-05  | 1.47E-05 | 1.36E-05 | 1.86E-05 |
| 6h  | 6.61E-06  | 1.49E-06 | 3.33E-06 | 9.25E-06 |
| 12h | 3.17E-06  | 2.20E-06 | 3.71E-06 | 2.94E-05 |
| 24h | 1.95E-06  | 1.67E-06 | 2.17E-06 | 3.85E-06 |
| 36h | 3.52E-06  | 3.13E-06 | 3.63E-06 | 5.94E-06 |
| 48h | 1.44E-06  | 1.05E-06 | 1.57E-06 | 3.25E-06 |
| 72h | 4.61E-07  | 9.71E-07 | 3.36E-07 | 3.35E-06 |

|     |           |          |          |          |
|-----|-----------|----------|----------|----------|
|     | cgd5_1360 |          |          |          |
| 2h  | 9.03E-05  | 4.47E-05 | 5.25E-05 | 4.62E-05 |
| 6h  | 2.82E-03  | 6.19E-05 | 1.31E-04 | 7.65E-04 |
| 12h | 6.81E-06  | 1.63E-06 | 1.71E-05 | 1.75E-04 |
| 24h | 1.71E-05  | 3.66E-05 | 8.54E-05 | 7.62E-04 |
| 36h | 6.50E-06  | 5.22E-05 | 3.34E-05 | 2.29E-04 |
| 48h | 7.67E-04  | 2.24E-05 | 2.19E-05 | 2.80E-04 |
| 72h | 1.45E-05  | 7.03E-05 | 5.83E-06 | 2.17E-04 |
|     | cgd5_1370 |          |          |          |
| 2h  | 1.54E-05  | 1.14E-05 | 1.05E-05 | 4.33E-06 |
| 6h  | 4.42E-06  | 1.90E-06 | 1.68E-06 | 4.02E-06 |
| 12h | 3.21E-07  | 1.59E-06 | 1.01E-06 | 3.96E-06 |
| 24h | 1.14E-06  | 1.04E-05 | 1.35E-06 | 2.82E-06 |
| 36h | 1.14E-06  | 1.44E-06 | 3.54E-06 | 1.93E-06 |
| 48h | 1.02E-05  | 4.51E-06 | 9.96E-06 | 1.88E-05 |
| 72h | 6.23E-07  | 1.65E-06 | 6.28E-07 | 1.14E-05 |
|     | cgd5_1380 |          |          |          |
| 2h  | 3.67E-05  | 2.13E-05 | 1.99E-05 | 1.13E-05 |
| 6h  | 5.84E-06  | 2.39E-06 | 4.11E-06 | 2.21E-06 |
| 12h | 5.94E-07  | 1.84E-07 | 3.13E-06 | 1.56E-05 |
| 24h | 7.50E-06  | 4.23E-06 | 3.13E-06 | 1.23E-05 |
| 36h | 1.29E-06  | 1.40E-06 | 1.28E-06 | 4.72E-06 |
| 48h | 3.81E-06  | 2.45E-06 | 3.82E-06 | 1.45E-05 |
| 72h | 3.46E-07  | 9.41E-07 | 3.58E-07 | 3.03E-06 |
|     | cgd5_1410 |          |          |          |
| 2h  | 1.36E-07  | 3.94E-07 | 2.09E-07 | 3.83E-08 |
| 6h  | 3.07E-06  | 1.13E-06 | 7.72E-07 | 4.94E-07 |
| 12h | 1.23E-07  | 8.78E-09 | 3.00E-07 | 1.86E-06 |
| 24h | 4.19E-07  | 9.84E-07 | 4.02E-07 | 1.24E-06 |
| 36h | 3.24E-07  | 1.95E-07 | 3.07E-07 | 1.21E-06 |
| 48h | 3.37E-07  | 2.20E-07 | 2.03E-07 | 3.98E-07 |
| 72h | 4.95E-09  | 4.14E-08 | 1.25E-08 | 2.25E-07 |
|     | cgd5_1430 |          |          |          |
| 2h  | 2.28E-06  | 0.00E+00 | 4.51E-07 | 0.00E+00 |
| 6h  | 0.00E+00  | 0.00E+00 | 1.95E-07 | 1.51E-06 |
| 12h | 8.99E-07  | 0.00E+00 | 1.26E-08 | 0.00E+00 |
| 24h | 5.21E-07  | 6.06E-08 | 3.75E-07 | 1.06E-05 |
| 36h | 2.50E-06  | 2.42E-06 | 2.38E-06 | 2.42E-05 |
| 48h | 1.23E-05  | 1.36E-05 | 1.13E-05 | 1.20E-04 |
| 72h | 5.81E-06  | 7.37E-06 | 9.93E-07 | 6.86E-05 |
|     | cgd5_1640 |          |          |          |
| 2h  | 2.57E-06  | 2.52E-06 | 8.85E-07 | 1.80E-06 |
| 6h  | 3.59E-05  | 1.97E-05 | 1.27E-04 | 4.76E-05 |
| 12h | 6.75E-05  | 1.15E-04 | 1.38E-04 | 5.48E-05 |
| 24h | 1.77E-05  | 7.33E-05 | 5.33E-05 | 1.76E-05 |
| 36h | 4.00E-05  | 8.03E-05 | 7.31E-05 | 6.86E-05 |
| 48h | 1.46E-05  | 4.54E-05 | 1.64E-05 | 1.80E-05 |
| 72h | 5.35E-06  | 2.58E-06 | 4.39E-06 | 3.62E-06 |
|     | cgd5_1650 |          |          |          |
| 2h  | 0.00E+00  | 0.00E+00 | 0.00E+00 | 0.00E+00 |
| 6h  | 3.18E-04  | 2.86E-05 | 6.50E-04 | 7.16E-05 |
| 12h | 1.79E-02  | 1.16E-03 | 2.67E-03 | 1.04E-02 |
| 24h | 2.00E-03  | 2.62E-04 | 1.23E-03 | 1.32E-03 |

|     |           |          |          |          |
|-----|-----------|----------|----------|----------|
| 36h | 2.36E-03  | 2.42E-04 | 5.48E-03 | 4.28E-03 |
| 48h | 9.43E-04  | 5.73E-05 | 1.35E-03 | 1.88E-03 |
| 72h | 1.23E-03  | 1.64E-05 | 2.66E-04 | 2.26E-04 |
|     | cgd5_1660 |          |          |          |
| 2h  | 0.00E+00  | 0.00E+00 | 0.00E+00 | 1.38E-08 |
| 6h  | 8.31E-08  | 1.90E-07 | 0.00E+00 | 0.00E+00 |
| 12h | 3.87E-05  | 8.97E-05 | 4.75E-05 | 2.21E-04 |
| 24h | 3.62E-06  | 3.96E-05 | 4.67E-06 | 1.43E-06 |
| 36h | 8.52E-06  | 1.94E-05 | 2.56E-05 | 1.16E-05 |
| 48h | 2.76E-06  | 1.22E-05 | 2.50E-06 | 1.27E-06 |
| 72h | 2.05E-06  | 5.53E-06 | 1.61E-06 | 1.39E-06 |
|     | cgd5_1670 |          |          |          |
| 2h  | 0.00E+00  | 0.00E+00 | 0.00E+00 | 0.00E+00 |
| 6h  | 9.90E-08  | 0.00E+00 | 5.33E-08 | 7.53E-09 |
| 12h | 1.21E-04  | 4.03E-04 | 1.38E-04 | 4.52E-05 |
| 24h | 9.04E-06  | 6.42E-05 | 1.06E-05 | 2.67E-06 |
| 36h | 2.90E-05  | 5.51E-05 | 7.61E-05 | 7.54E-05 |
| 48h | 7.12E-06  | 2.37E-05 | 7.20E-06 | 4.15E-06 |
| 72h | 2.26E-06  | 7.05E-06 | 2.99E-06 | 1.35E-06 |
|     | cgd5_1680 |          |          |          |
| 2h  | 0.00E+00  | 0.00E+00 | 0.00E+00 | 0.00E+00 |
| 6h  | 2.65E-09  | 1.10E-08 | 7.44E-08 | 1.34E-08 |
| 12h | 9.13E-07  | 1.00E-07 | 9.29E-07 | 5.41E-07 |
| 24h | 2.82E-07  | 2.64E-07 | 2.22E-07 | 2.04E-07 |
| 36h | 1.49E-06  | 1.01E-06 | 1.64E-06 | 1.57E-06 |
| 48h | 7.92E-07  | 2.92E-07 | 3.56E-07 | 3.81E-07 |
| 72h | 2.66E-07  | 1.22E-07 | 1.78E-07 | 1.17E-07 |
|     | cgd5_1690 |          |          |          |
| 2h  | 3.09E-04  | 1.69E-04 | 5.44E-05 | 1.59E-04 |
| 6h  | 9.12E-04  | 4.53E-04 | 7.94E-04 | 1.39E-04 |
| 12h | 9.64E-05  | 1.35E-04 | 1.16E-03 | 2.62E-04 |
| 24h | 4.19E-04  | 1.01E-04 | 9.11E-04 | 8.10E-05 |
| 36h | 6.11E-04  | 6.41E-04 | 4.48E-04 | 2.49E-04 |
| 48h | 4.06E-04  | 7.09E-05 | 1.67E-04 | 1.19E-04 |
| 72h | 9.57E-05  | 4.99E-05 | 4.44E-05 | 1.94E-05 |
|     | cgd5_1710 |          |          |          |
| 2h  | 1.26E-04  | 4.09E-04 | 4.97E-05 | 1.01E-04 |
| 6h  | 1.47E-03  | 4.95E-04 | 3.99E-04 | 1.49E-04 |
| 12h | 8.74E-05  | 1.57E-04 | 4.73E-04 | 1.09E-04 |
| 24h | 1.58E-04  | 5.59E-04 | 1.96E-04 | 6.33E-05 |
| 36h | 7.98E-05  | 1.92E-04 | 6.91E-05 | 5.02E-05 |
| 48h | 5.33E-05  | 7.52E-05 | 3.09E-05 | 2.90E-05 |
| 72h | 6.32E-06  | 2.03E-05 | 7.58E-06 | 2.41E-06 |
|     | cgd5_1720 |          |          |          |
| 2h  | 8.50E-07  | 2.90E-06 | 2.52E-07 | 9.31E-07 |
| 6h  | 1.53E-05  | 2.06E-05 | 1.91E-05 | 4.66E-06 |
| 12h | 5.66E-07  | 7.69E-06 | 4.42E-06 | 1.07E-06 |
| 24h | 2.53E-06  | 7.19E-06 | 4.47E-06 | 2.23E-06 |
| 36h | 3.08E-06  | 8.58E-06 | 1.94E-06 | 1.33E-06 |
| 48h | 2.77E-06  | 3.01E-06 | 2.76E-06 | 1.29E-06 |
| 72h | 3.12E-07  | 1.10E-06 | 5.85E-07 | 1.03E-07 |
|     | cgd5_1730 |          |          |          |
| 2h  | 2.02E-06  | 2.44E-06 | 2.36E-07 | 8.63E-07 |

|           |          |          |          |          |
|-----------|----------|----------|----------|----------|
| 6h        | 1.96E-06 | 2.67E-06 | 1.82E-06 | 4.96E-06 |
| 12h       | 2.90E-07 | 3.98E-08 | 1.80E-06 | 4.72E-07 |
| 24h       | 1.57E-06 | 3.31E-07 | 1.51E-06 | 1.16E-06 |
| 36h       | 5.30E-07 | 1.21E-06 | 6.73E-07 | 3.65E-07 |
| 48h       | 7.48E-07 | 1.94E-07 | 5.22E-07 | 4.31E-07 |
| 72h       | 9.23E-08 | 1.81E-07 | 3.89E-08 | 4.00E-08 |
| cgd5_1750 |          |          |          |          |
| 2h        | 0.00E+00 | 0.00E+00 | 0.00E+00 | 0.00E+00 |
| 6h        | 0.00E+00 | 0.00E+00 | 1.52E-08 | 0.00E+00 |
| 12h       | 9.73E-09 | 3.95E-08 | 3.55E-08 | 3.10E-09 |
| 24h       | 1.10E-07 | 3.05E-08 | 7.09E-08 | 4.76E-08 |
| 36h       | 3.18E-08 | 5.04E-08 | 7.28E-08 | 5.00E-08 |
| 48h       | 1.33E-06 | 3.30E-07 | 1.57E-06 | 1.20E-06 |
| 72h       | 2.03E-07 | 3.64E-07 | 1.70E-07 | 1.12E-07 |
| cgd5_1760 |          |          |          |          |
| 2h        | 1.55E-05 | 9.47E-05 | 5.27E-06 | 1.41E-05 |
| 6h        | 2.59E-05 | 4.79E-05 | 3.06E-05 | 2.35E-05 |
| 12h       | 8.74E-06 | 2.95E-05 | 5.53E-05 | 1.77E-05 |
| 24h       | 1.69E-05 | 2.73E-05 | 2.82E-05 | 1.31E-05 |
| 36h       | 5.20E-06 | 3.66E-05 | 8.19E-06 | 5.73E-06 |
| 48h       | 6.99E-06 | 1.16E-05 | 9.42E-06 | 5.57E-06 |
| 72h       | 9.23E-07 | 7.99E-06 | 1.12E-06 | 1.34E-06 |
| cgd5_1770 |          |          |          |          |
| 2h        | 4.39E-07 | 1.52E-07 | 2.72E-07 | 1.46E-07 |
| 6h        | 2.33E-08 | 2.94E-08 | 2.56E-07 | 1.18E-07 |
| 12h       | 3.94E-07 | 5.72E-07 | 1.01E-06 | 2.24E-07 |
| 24h       | 8.95E-08 | 9.43E-08 | 9.10E-07 | 1.94E-07 |
| 36h       | 4.05E-07 | 5.63E-07 | 1.22E-06 | 5.45E-07 |
| 48h       | 1.72E-07 | 1.52E-07 | 3.79E-07 | 2.27E-07 |
| 72h       | 1.98E-07 | 1.10E-07 | 2.51E-07 | 1.63E-07 |
| cgd5_1930 |          |          |          |          |
| 2h        | 0.00E+00 | 0.00E+00 | 0.00E+00 | 0.00E+00 |
| 6h        | 3.12E-07 | 1.48E-07 | 1.93E-07 | 1.72E-07 |
| 12h       | 8.51E-07 | 2.27E-06 | 2.54E-06 | 2.54E-07 |
| 24h       | 3.99E-07 | 4.02E-07 | 1.45E-06 | 2.05E-07 |
| 36h       | 4.91E-07 | 5.61E-07 | 1.45E-06 | 7.20E-07 |
| 48h       | 4.29E-07 | 2.70E-07 | 9.16E-07 | 1.94E-07 |
| 72h       | 1.71E-07 | 1.76E-07 | 2.18E-07 | 1.55E-07 |
| cgd5_1940 |          |          |          |          |
| 2h        | 8.10E-09 | 0.00E+00 | 0.00E+00 | 0.00E+00 |
| 6h        | 0.00E+00 | 0.00E+00 | 0.00E+00 | 0.00E+00 |
| 12h       | 6.33E-07 | 2.47E-06 | 1.14E-06 | 3.59E-07 |
| 24h       | 1.65E-07 | 3.76E-07 | 2.54E-07 | 7.22E-08 |
| 36h       | 6.50E-08 | 1.34E-07 | 2.91E-07 | 2.31E-07 |
| 48h       | 6.35E-08 | 4.02E-05 | 1.49E-07 | 3.08E-08 |
| 72h       | 1.32E-07 | 1.43E-07 | 2.57E-07 | 3.36E-07 |
| cgd5_1950 |          |          |          |          |
| 2h        | 0.00E+00 | 0.00E+00 | 0.00E+00 | 1.49E-08 |
| 6h        | 0.00E+00 | 0.00E+00 | 0.00E+00 | 0.00E+00 |
| 12h       | 5.88E-07 | 1.48E-06 | 1.09E-06 | 4.33E-07 |
| 24h       | 1.57E-07 | 2.69E-07 | 1.63E-07 | 4.84E-08 |
| 36h       | 1.87E-07 | 1.69E-07 | 7.55E-07 | 3.63E-07 |
| 48h       | 6.40E-08 | 4.51E-08 | 3.31E-07 | 1.71E-08 |

|     |           |          |          |          |
|-----|-----------|----------|----------|----------|
| 72h | 1.32E-07  | 1.62E-07 | 1.11E-07 | 1.01E-07 |
|     | cgd5_1960 |          |          |          |
| 2h  | 1.13E-06  | 1.07E-06 | 6.18E-07 | 1.34E-06 |
| 6h  | 1.83E-06  | 8.44E-07 | 3.71E-06 | 1.92E-06 |
| 12h | 5.44E-05  | 9.94E-05 | 5.74E-05 | 4.24E-05 |
| 24h | 1.69E-05  | 1.60E-05 | 6.96E-06 | 2.86E-06 |
| 36h | 1.54E-05  | 1.61E-05 | 3.05E-05 | 1.40E-05 |
| 48h | 4.28E-06  | 2.71E-06 | 7.07E-06 | 1.44E-06 |
| 72h | 2.32E-06  | 2.52E-06 | 3.21E-06 | 2.09E-06 |
|     | cgd5_1970 |          |          |          |
| 2h  | 2.05E-07  | 6.34E-07 | 1.72E-07 | 3.20E-07 |
| 6h  | 7.52E-07  | 1.76E-06 | 4.96E-06 | 9.06E-07 |
| 12h | 9.06E-07  | 2.20E-06 | 2.67E-06 | 8.27E-07 |
| 24h | 1.95E-07  | 2.82E-07 | 1.54E-06 | 4.95E-07 |
| 36h | 2.10E-06  | 2.23E-06 | 3.39E-06 | 5.16E-06 |
| 48h | 3.45E-07  | 1.61E-07 | 6.49E-07 | 2.77E-07 |
| 72h | 5.17E-07  | 6.82E-07 | 2.08E-07 | 4.55E-07 |
|     | cgd5_1980 |          |          |          |
| 2h  | 8.27E-07  | 1.09E-06 | 2.85E-07 | 9.15E-07 |
| 6h  | 1.84E-08  | 6.07E-08 | 3.57E-08 | 3.72E-08 |
| 12h | 8.44E-07  | 2.20E-06 | 1.04E-06 | 6.59E-07 |
| 24h | 1.64E-07  | 1.69E-07 | 3.67E-07 | 1.13E-07 |
| 36h | 5.19E-07  | 1.16E-06 | 1.47E-06 | 8.55E-07 |
| 48h | 4.58E-07  | 2.22E-07 | 4.88E-07 | 2.78E-07 |
| 72h | 2.91E-07  | 2.87E-07 | 7.90E-07 | 2.40E-07 |
|     | cgd5_1990 |          |          |          |
| 2h  | 7.87E-03  | 5.83E-03 | 1.74E-03 | 6.61E-03 |
| 6h  | 3.82E-03  | 2.44E-03 | 1.00E-03 | 1.09E-02 |
| 12h | 4.96E-03  | 3.35E-03 | 1.09E-03 | 1.60E-03 |
| 24h | 2.72E-03  | 1.87E-04 | 1.26E-03 | 5.35E-03 |
| 36h | 1.65E-03  | 2.57E-03 | 8.91E-04 | 3.85E-04 |
| 48h | 1.03E-03  | 9.97E-04 | 1.19E-03 | 1.96E-04 |
| 72h | 6.04E-04  | 3.15E-04 | 6.66E-04 | 1.24E-03 |
|     | cgd5_2010 |          |          |          |
| 2h  | 2.21E-06  | 1.81E-06 | 1.64E-06 | 2.31E-06 |
| 6h  | 1.56E-07  | 1.28E-07 | 3.01E-07 | 4.28E-07 |
| 12h | 7.55E-07  | 2.42E-06 | 3.92E-06 | 8.35E-07 |
| 24h | 7.95E-07  | 4.96E-07 | 2.99E-07 | 5.62E-07 |
| 36h | 3.93E-07  | 6.12E-07 | 6.95E-07 | 1.87E-07 |
| 48h | 2.39E-07  | 2.82E-07 | 2.86E-07 | 1.74E-07 |
| 72h | 9.00E-08  | 1.30E-07 | 2.10E-07 | 6.75E-08 |
|     | cgd5_2020 |          |          |          |
| 2h  | 1.53E-09  | 0.00E+00 | 0.00E+00 | 0.00E+00 |
| 6h  | 0.00E+00  | 2.76E-10 | 0.00E+00 | 0.00E+00 |
| 12h | 7.13E-08  | 0.00E+00 | 6.70E-08 | 5.82E-09 |
| 24h | 3.13E-08  | 3.59E-09 | 2.52E-08 | 1.88E-09 |
| 36h | 4.36E-08  | 8.90E-08 | 1.33E-07 | 5.47E-08 |
| 48h | 5.79E-08  | 1.34E-07 | 1.10E-07 | 4.68E-08 |
| 72h | 2.95E-08  | 3.63E-08 | 8.82E-08 | 3.97E-08 |
|     | cgd5_2040 |          |          |          |
| 2h  | 1.56E-06  | 1.24E-08 | 0.00E+00 | 0.00E+00 |
| 6h  | 2.69E-07  | 1.51E-07 | 5.39E-07 | 0.00E+00 |
| 12h | 1.55E-07  | 3.48E-07 | 1.60E-07 | 2.56E-08 |

|           |          |          |          |          |
|-----------|----------|----------|----------|----------|
| 24h       | 5.77E-08 | 1.97E-07 | 4.62E-07 | 4.65E-07 |
| 36h       | 2.30E-07 | 2.53E-07 | 9.32E-07 | 5.77E-08 |
| 48h       | 4.60E-07 | 3.44E-07 | 3.74E-07 | 8.49E-08 |
| 72h       | 2.87E-08 | 2.04E-08 | 1.32E-07 | 6.26E-09 |
| cgd5_2050 |          |          |          |          |
| 2h        | 0.00E+00 | 0.00E+00 | 0.00E+00 | 0.00E+00 |
| 6h        | 1.09E-08 | 0.00E+00 | 0.00E+00 | 0.00E+00 |
| 12h       | 6.01E-07 | 1.08E-06 | 7.91E-07 | 1.74E-07 |
| 24h       | 2.82E-07 | 3.02E-07 | 8.86E-07 | 3.34E-07 |
| 36h       | 8.36E-07 | 8.77E-07 | 3.70E-06 | 5.25E-07 |
| 48h       | 3.01E-06 | 2.73E-06 | 4.45E-06 | 6.11E-07 |
| 72h       | 1.77E-07 | 1.36E-07 | 7.35E-07 | 2.32E-07 |
| cgd5_2060 |          |          |          |          |
| 2h        | 3.04E-04 | 1.75E-04 | 3.31E-04 | 2.06E-04 |
| 6h        | 2.28E-04 | 1.30E-04 | 2.68E-04 | 2.64E-04 |
| 12h       | 4.44E-05 | 2.32E-05 | 7.75E-04 | 7.28E-05 |
| 24h       | 1.91E-04 | 1.47E-04 | 6.21E-04 | 1.44E-04 |
| 36h       | 4.46E-05 | 4.97E-05 | 2.53E-04 | 1.82E-05 |
| 48h       | 2.99E-05 | 1.58E-05 | 1.40E-04 | 5.93E-06 |
| 72h       | 3.78E-06 | 6.58E-06 | 5.13E-06 | 3.38E-06 |
| cgd5_2070 |          |          |          |          |
| 2h        | 1.83E-03 | 6.46E-04 | 8.69E-04 | 9.55E-04 |
| 6h        | 1.24E-03 | 2.22E-03 | 7.14E-04 | 7.21E-03 |
| 12h       | 2.13E-04 | 1.42E-03 | 1.54E-03 | 1.77E-03 |
| 24h       | 4.38E-04 | 1.88E-03 | 1.43E-03 | 6.98E-04 |
| 36h       | 1.18E-04 | 2.69E-03 | 1.14E-03 | 1.40E-04 |
| 48h       | 1.33E-04 | 8.62E-04 | 7.58E-05 | 2.06E-04 |
| 72h       | 5.84E-05 | 2.54E-04 | 8.38E-05 | 9.78E-05 |
| cgd5_2090 |          |          |          |          |
| 2h        | 0.00E+00 | 0.00E+00 | 0.00E+00 | 0.00E+00 |
| 6h        | 0.00E+00 | 6.11E-08 | 6.09E-08 | 6.37E-07 |
| 12h       | 7.49E-08 | 1.02E-06 | 2.26E-06 | 6.48E-07 |
| 24h       | 6.59E-07 | 3.92E-06 | 2.68E-05 | 1.74E-06 |
| 36h       | 2.87E-06 | 7.60E-06 | 1.96E-05 | 2.22E-06 |
| 48h       | 3.31E-06 | 5.80E-06 | 3.48E-05 | 4.87E-06 |
| 72h       | 4.65E-06 | 1.21E-05 | 8.93E-05 | 1.33E-05 |
| cgd5_2100 |          |          |          |          |
| 2h        | 8.17E-07 | 1.62E-07 | 4.82E-08 | 3.16E-07 |
| 6h        | 5.86E-07 | 3.81E-07 | 4.47E-07 | 8.68E-07 |
| 12h       | 1.59E-07 | 1.10E-07 | 4.58E-07 | 2.51E-07 |
| 24h       | 3.17E-07 | 4.38E-07 | 3.85E-07 | 2.24E-07 |
| 36h       | 3.57E-07 | 4.84E-07 | 7.95E-07 | 1.33E-07 |
| 48h       | 2.10E-07 | 1.56E-07 | 4.05E-07 | 1.52E-07 |
| 72h       | 7.94E-07 | 2.93E-07 | 2.91E-07 | 2.24E-07 |
| cgd5_2110 |          |          |          |          |
| 2h        | 1.87E-06 | 6.94E-07 | 1.08E-07 | 4.37E-07 |
| 6h        | 3.41E-07 | 7.41E-07 | 5.82E-07 | 6.43E-07 |
| 12h       | 1.35E-06 | 1.03E-07 | 6.88E-07 | 4.89E-07 |
| 24h       | 2.27E-07 | 8.19E-07 | 9.46E-07 | 3.66E-07 |
| 36h       | 7.15E-07 | 8.05E-07 | 6.56E-07 | 2.12E-07 |
| 48h       | 3.05E-07 | 3.30E-07 | 6.12E-07 | 3.10E-07 |
| 72h       | 3.40E-07 | 3.82E-07 | 5.58E-07 | 4.58E-07 |
| cgd5_2120 |          |          |          |          |

|     |           |          |          |          |
|-----|-----------|----------|----------|----------|
| 2h  | 2.50E-06  | 3.98E-06 | 1.49E-06 | 4.34E-06 |
| 6h  | 1.16E-06  | 5.86E-06 | 9.21E-06 | 3.01E-06 |
| 12h | 2.97E-06  | 4.63E-07 | 1.07E-05 | 2.17E-06 |
| 24h | 1.24E-06  | 4.00E-06 | 1.34E-05 | 2.62E-06 |
| 36h | 3.09E-06  | 6.62E-06 | 7.81E-06 | 1.25E-06 |
| 48h | 1.17E-06  | 2.05E-06 | 2.44E-05 | 4.44E-07 |
| 72h | 1.84E-06  | 2.61E-06 | 7.87E-06 | 8.69E-07 |
|     | cgd5_2130 |          |          |          |
| 2h  | 1.80E-07  | 8.73E-08 | 3.20E-08 | 1.12E-07 |
| 6h  | 0.00E+00  | 7.33E-09 | 1.74E-08 | 9.88E-09 |
| 12h | 6.37E-07  | 3.21E-07 | 7.85E-07 | 3.01E-07 |
| 24h | 1.42E-07  | 2.80E-07 | 9.62E-07 | 2.97E-07 |
| 36h | 1.83E-06  | 1.85E-06 | 1.86E-06 | 3.15E-07 |
| 48h | 2.33E-06  | 9.00E-07 | 2.34E-06 | 5.66E-07 |
| 72h | 8.22E-07  | 7.47E-07 | 1.36E-06 | 6.94E-07 |
|     | cgd5_2140 |          |          |          |
| 2h  | 1.71E-05  | 3.08E-04 | 9.26E-05 | 1.34E-04 |
| 6h  | 1.12E-05  | 1.40E-04 | 5.43E-05 | 6.93E-05 |
| 12h | 2.51E-05  | 8.00E-05 | 1.56E-04 | 6.49E-05 |
| 24h | 8.75E-06  | 1.16E-04 | 8.01E-05 | 3.58E-05 |
| 36h | 8.86E-06  | 2.84E-04 | 2.01E-04 | 8.00E-06 |
| 48h | 1.56E-05  | 1.76E-04 | 5.69E-05 | 1.86E-05 |
| 72h | 2.40E-06  | 1.14E-04 | 9.66E-05 | 4.51E-05 |
|     | cgd5_2150 |          |          |          |
| 2h  | 6.24E-06  | 1.68E-06 | 8.38E-07 | 1.31E-06 |
| 6h  | 5.73E-06  | 1.22E-06 | 1.76E-06 | 4.32E-06 |
| 12h | 3.31E-06  | 1.04E-06 | 2.78E-06 | 1.49E-06 |
| 24h | 1.81E-06  | 6.45E-07 | 1.68E-06 | 1.18E-06 |
| 36h | 2.02E-06  | 2.94E-06 | 4.61E-06 | 4.45E-07 |
| 48h | 1.76E-06  | 1.55E-06 | 2.56E-06 | 5.43E-07 |
| 72h | 7.36E-07  | 8.85E-07 | 1.43E-06 | 7.14E-07 |
|     | cgd5_2190 |          |          |          |
| 2h  | 7.89E-06  | 3.11E-06 | 3.98E-07 | 1.78E-06 |
| 6h  | 1.23E-05  | 4.23E-06 | 4.14E-06 | 1.12E-05 |
| 12h | 2.12E-06  | 3.27E-06 | 1.93E-06 | 9.19E-07 |
| 24h | 2.43E-06  | 1.30E-06 | 4.39E-06 | 3.17E-06 |
| 36h | 3.15E-06  | 6.02E-06 | 4.76E-06 | 8.03E-07 |
| 48h | 2.61E-06  | 2.89E-05 | 3.14E-06 | 6.43E-07 |
| 72h | 2.71E-07  | 3.72E-07 | 7.09E-07 | 3.76E-07 |
|     | cgd5_2200 |          |          |          |
| 2h  | 1.31E-04  | 1.71E-04 | 2.53E-05 | 4.53E-05 |
| 6h  | 8.26E-05  | 3.77E-05 | 1.28E-04 | 1.59E-04 |
| 12h | 9.94E-06  | 1.75E-05 | 7.95E-05 | 3.35E-05 |
| 24h | 4.06E-05  | 3.17E-05 | 1.04E-04 | 2.10E-05 |
| 36h | 6.66E-06  | 5.65E-05 | 7.12E-05 | 5.33E-06 |
| 48h | 1.13E-05  | 2.82E-05 | 3.06E-05 | 3.61E-06 |
| 72h | 4.79E-07  | 2.73E-06 | 5.28E-06 | 1.43E-06 |
|     | cgd5_2210 |          |          |          |
| 2h  | 1.46E-06  | 1.84E-04 | 4.25E-05 | 4.32E-05 |
| 6h  | 4.13E-05  | 2.08E-04 | 1.84E-04 | 1.12E-04 |
| 12h | 8.60E-07  | 7.45E-05 | 1.11E-04 | 4.46E-05 |
| 24h | 1.03E-05  | 2.05E-04 | 2.04E-04 | 4.05E-05 |
| 36h | 5.02E-06  | 2.69E-04 | 1.15E-04 | 1.62E-05 |



|     |           |          |          |          |
|-----|-----------|----------|----------|----------|
| 48h | 1.08E-05  | 1.72E-04 | 5.35E-05 | 2.88E-05 |
| 72h | 6.74E-07  | 5.82E-05 | 3.33E-05 | 5.21E-05 |
|     | cgd5_2230 |          |          |          |
| 2h  | 4.19E-08  | 0.00E+00 | 0.00E+00 | 0.00E+00 |
| 6h  | 7.77E-06  | 3.22E-06 | 4.47E-06 | 6.87E-06 |
| 12h | 3.51E-07  | 2.98E-07 | 1.30E-06 | 6.57E-07 |
| 24h | 3.04E-06  | 5.95E-07 | 7.55E-06 | 4.17E-06 |
| 36h | 1.74E-06  | 6.63E-06 | 7.34E-06 | 9.46E-07 |
| 48h | 8.56E-07  | 1.39E-06 | 9.29E-06 | 7.28E-07 |
| 72h | 3.36E-07  | 3.86E-07 | 1.43E-06 | 3.06E-07 |
|     | cgd5_2240 |          |          |          |
| 2h  | 0.00E+00  | 1.99E-07 | 3.31E-08 | 5.07E-08 |
| 6h  | 5.71E-05  | 4.64E-05 | 1.07E-05 | 4.37E-05 |
| 12h | 2.70E-04  | 1.88E-04 | 2.85E-04 | 1.21E-04 |
| 24h | 7.40E-05  | 2.57E-05 | 7.84E-05 | 4.07E-05 |
| 36h | 4.74E-05  | 3.80E-05 | 3.38E-05 | 5.10E-05 |
| 48h | 3.96E-05  | 1.41E-05 | 3.50E-05 | 1.33E-05 |
| 72h | 1.03E-05  | 2.69E-06 | 1.31E-05 | 6.74E-06 |
|     | cgd5_2250 |          |          |          |
| 2h  | 0.00E+00  | 0.00E+00 | 0.00E+00 | 0.00E+00 |
| 6h  | 0.00E+00  | 0.00E+00 | 0.00E+00 | 0.00E+00 |
| 12h | 3.18E-04  | 2.18E-04 | 5.16E-04 | 2.40E-04 |
| 24h | 1.48E-04  | 8.70E-05 | 3.59E-05 | 1.71E-05 |
| 36h | 1.19E-05  | 1.30E-05 | 2.70E-05 | 4.61E-05 |
| 48h | 1.76E-05  | 5.32E-06 | 2.59E-05 | 7.87E-06 |
| 72h | 1.50E-05  | 6.33E-06 | 6.16E-05 | 7.57E-06 |
|     | cgd5_2280 |          |          |          |
| 2h  | 2.56E-07  | 1.38E-07 | 1.12E-08 | 2.38E-07 |
| 6h  | 3.31E-08  | 1.13E-07 | 7.69E-08 | 1.34E-07 |
| 12h | 2.02E-06  | 1.65E-06 | 1.10E-06 | 9.79E-07 |
| 24h | 6.06E-07  | 2.63E-07 | 1.58E-06 | 3.28E-07 |
| 36h | 7.98E-07  | 7.26E-07 | 5.44E-07 | 1.31E-06 |
| 48h | 1.09E-06  | 3.13E-07 | 3.84E-06 | 6.89E-07 |
| 72h | 3.41E-06  | 1.61E-06 | 1.69E-06 | 3.16E-06 |
|     | cgd5_2300 |          |          |          |
| 2h  | 2.81E-07  | 2.31E-07 | 3.89E-08 | 9.54E-08 |
| 6h  | 3.15E-07  | 9.20E-08 | 1.25E-07 | 2.07E-07 |
| 12h | 7.97E-08  | 7.65E-09 | 4.84E-08 | 8.94E-08 |
| 24h | 8.18E-08  | 8.42E-08 | 7.40E-07 | 1.01E-07 |
| 36h | 4.43E-07  | 3.23E-07 | 1.00E-07 | 2.05E-07 |
| 48h | 8.82E-07  | 2.86E-07 | 3.06E-06 | 6.10E-07 |
| 72h | 3.03E-06  | 1.07E-06 | 2.07E-06 | 2.09E-06 |
|     | cgd5_2310 |          |          |          |
| 2h  | 8.72E-08  | 1.21E-06 | 1.86E-07 | 6.48E-07 |
| 6h  | 1.64E-06  | 1.89E-06 | 2.91E-06 | 1.69E-06 |
| 12h | 5.54E-07  | 1.76E-06 | 1.54E-06 | 2.55E-06 |
| 24h | 5.21E-07  | 5.28E-07 | 4.25E-06 | 1.52E-06 |
| 36h | 2.91E-06  | 3.04E-06 | 1.02E-06 | 3.27E-06 |
| 48h | 9.60E-07  | 3.26E-07 | 1.50E-06 | 1.16E-06 |
| 72h | 6.64E-07  | 4.56E-07 | 7.82E-07 | 1.19E-06 |
|     | cgd5_2320 |          |          |          |
| 2h  | 9.42E-06  | 4.97E-06 | 7.45E-06 | 2.82E-05 |
| 6h  | 2.73E-05  | 1.92E-05 | 1.29E-05 | 2.40E-05 |

|     |           |          |          |          |
|-----|-----------|----------|----------|----------|
| 12h | 1.03E-04  | 4.59E-05 | 1.09E-04 | 6.05E-05 |
| 24h | 5.93E-05  | 2.31E-05 | 1.31E-04 | 5.17E-05 |
| 36h | 7.60E-05  | 5.23E-05 | 4.32E-05 | 5.45E-05 |
| 48h | 4.44E-05  | 9.86E-06 | 2.10E-04 | 2.01E-05 |
| 72h | 2.95E-05  | 1.18E-05 | 5.13E-05 | 1.79E-05 |
|     | cgd5_2330 |          |          |          |
| 2h  | 5.01E-07  | 2.68E-06 | 6.81E-08 | 9.83E-07 |
| 6h  | 4.30E-07  | 4.63E-07 | 7.11E-07 | 1.95E-06 |
| 12h | 7.27E-06  | 7.90E-06 | 2.74E-06 | 4.10E-06 |
| 24h | 1.77E-06  | 1.01E-06 | 4.74E-06 | 3.53E-06 |
| 36h | 7.19E-06  | 3.88E-06 | 2.65E-06 | 6.00E-06 |
| 48h | 2.02E-06  | 1.04E-06 | 2.52E-06 | 2.28E-06 |
| 72h | 1.21E-06  | 3.05E-07 | 2.34E-06 | 8.10E-07 |
|     | cgd5_2340 |          |          |          |
| 2h  | 5.01E-06  | 3.56E-06 | 1.21E-06 | 2.31E-06 |
| 6h  | 1.65E-05  | 1.61E-05 | 1.13E-05 | 2.00E-05 |
| 12h | 1.25E-05  | 9.60E-07 | 1.27E-05 | 4.78E-06 |
| 24h | 8.05E-06  | 4.73E-06 | 2.84E-05 | 1.34E-05 |
| 36h | 2.28E-05  | 8.72E-06 | 7.18E-06 | 5.92E-06 |
| 48h | 2.01E-05  | 7.56E-06 | 2.56E-05 | 8.43E-06 |
| 72h | 7.26E-06  | 1.50E-06 | 2.09E-05 | 4.56E-06 |
|     | cgd5_2350 |          |          |          |
| 2h  | 1.86E-06  | 2.32E-06 | 1.43E-06 | 2.18E-06 |
| 6h  | 8.97E-07  | 1.48E-06 | 2.63E-06 | 6.65E-06 |
| 12h | 1.22E-07  | 2.86E-07 | 5.12E-06 | 1.69E-06 |
| 24h | 5.19E-07  | 6.83E-07 | 3.30E-06 | 3.45E-06 |
| 36h | 1.50E-06  | 9.11E-07 | 7.56E-07 | 5.26E-07 |
| 48h | 8.91E-07  | 9.12E-07 | 6.09E-07 | 6.86E-07 |
| 72h | 1.13E-07  | 6.37E-08 | 8.02E-07 | 2.90E-07 |
|     | cgd5_2360 |          |          |          |
| 2h  | 5.56E-07  | 1.63E-07 | 2.86E-08 | 0.00E+00 |
| 6h  | 2.44E-05  | 7.41E-06 | 1.94E-05 | 6.10E-06 |
| 12h | 6.30E-08  | 1.39E-07 | 1.29E-07 | 3.02E-07 |
| 24h | 1.38E-06  | 5.89E-07 | 9.81E-06 | 2.66E-06 |
| 36h | 2.65E-06  | 1.74E-06 | 1.58E-06 | 5.12E-07 |
| 48h | 4.74E-06  | 1.14E-06 | 7.26E-06 | 2.13E-06 |
| 72h | 5.59E-07  | 3.11E-07 | 2.48E-06 | 1.41E-06 |
|     | cgd5_2370 |          |          |          |
| 2h  | 6.16E-06  | 2.42E-05 | 7.12E-07 | 1.10E-05 |
| 6h  | 7.28E-05  | 3.14E-05 | 1.11E-05 | 1.23E-04 |
| 12h | 2.89E-06  | 3.48E-06 | 1.61E-05 | 3.12E-05 |
| 24h | 9.87E-06  | 1.42E-05 | 1.74E-05 | 3.20E-05 |
| 36h | 6.71E-06  | 2.96E-06 | 4.28E-06 | 6.07E-06 |
| 48h | 9.23E-06  | 3.13E-06 | 8.30E-06 | 5.13E-06 |
| 72h | 7.88E-07  | 4.29E-07 | 5.78E-06 | 1.35E-06 |
|     | cgd5_2380 |          |          |          |
| 2h  | 3.84E-06  | 2.59E-05 | 5.19E-06 | 6.64E-06 |
| 6h  | 2.57E-06  | 2.93E-06 | 1.48E-05 | 1.07E-05 |
| 12h | 5.34E-06  | 4.51E-07 | 1.32E-05 | 7.79E-06 |
| 24h | 5.62E-06  | 2.81E-06 | 4.28E-05 | 1.15E-05 |
| 36h | 8.92E-06  | 3.06E-06 | 1.32E-05 | 8.35E-06 |
| 48h | 4.96E-06  | 1.50E-06 | 1.73E-05 | 3.09E-06 |
| 72h | 2.34E-06  | 2.25E-06 | 3.48E-05 | 2.97E-06 |

|     |           |          |          |          |
|-----|-----------|----------|----------|----------|
|     | cgd5_2530 |          |          |          |
| 2h  | 0.00E+00  | 0.00E+00 | 1.57E-08 | 1.93E-08 |
| 6h  | 9.49E-07  | 9.49E-07 | 2.97E-06 | 8.57E-07 |
| 12h | 2.54E-07  | 2.54E-07 | 3.55E-07 | 4.73E-07 |
| 24h | 3.96E-07  | 3.96E-07 | 8.66E-06 | 1.42E-06 |
| 36h | 8.73E-07  | 8.73E-07 | 7.19E-07 | 1.29E-06 |
| 48h | 2.00E-06  | 2.00E-06 | 5.93E-06 | 1.54E-06 |
| 72h | 4.69E-06  | 4.69E-06 | 2.08E-06 | 3.57E-06 |
|     | cgd5_2540 |          |          |          |
| 2h  | 1.15E-06  | 1.15E-06 | 5.23E-07 | 1.63E-06 |
| 6h  | 3.07E-07  | 3.07E-07 | 6.25E-07 | 5.78E-07 |
| 12h | 1.49E-07  | 1.49E-07 | 4.96E-07 | 4.82E-07 |
| 24h | 6.69E-07  | 6.69E-07 | 8.34E-07 | 4.53E-07 |
| 36h | 1.26E-07  | 1.26E-07 | 1.25E-07 | 3.34E-07 |
| 48h | 1.58E-07  | 1.58E-07 | 1.23E-07 | 1.48E-07 |
| 72h | 5.02E-08  | 5.02E-08 | 1.38E-07 | 2.99E-07 |
|     | cgd5_2560 |          |          |          |
| 2h  | 0.00E+00  | 0.00E+00 | 0.00E+00 | 2.02E-09 |
| 6h  | 0.00E+00  | 0.00E+00 | 3.86E-09 | 1.27E-08 |
| 12h | 0.00E+00  | 0.00E+00 | 1.93E-08 | 1.85E-08 |
| 24h | 3.83E-09  | 3.83E-09 | 1.11E-07 | 3.31E-08 |
| 36h | 4.62E-08  | 4.62E-08 | 1.01E-07 | 1.02E-07 |
| 48h | 9.98E-08  | 9.98E-08 | 1.17E-07 | 1.04E-07 |
| 72h | 2.82E-07  | 2.82E-07 | 1.26E-07 | 1.78E-07 |
|     | cgd5_2570 |          |          |          |
| 2h  | 3.50E-08  | 3.50E-08 | 0.00E+00 | 1.11E-07 |
| 6h  | 0.00E+00  | 0.00E+00 | 1.61E-07 | 1.14E-08 |
| 12h | 1.76E-04  | 1.76E-04 | 6.56E-05 | 6.43E-05 |
| 24h | 7.08E-06  | 7.08E-06 | 6.28E-06 | 2.32E-06 |
| 36h | 8.54E-06  | 8.54E-06 | 4.02E-05 | 2.34E-05 |
| 48h | 1.63E-06  | 1.63E-06 | 2.83E-06 | 2.21E-06 |
| 72h | 1.81E-05  | 1.81E-05 | 2.64E-05 | 1.36E-05 |
|     | cgd5_2580 |          |          |          |
| 2h  | 1.68E-08  | 1.68E-08 | 0.00E+00 | 1.88E-08 |
| 6h  | 0.00E+00  | 0.00E+00 | 6.61E-09 | 0.00E+00 |
| 12h | 2.04E-07  | 2.04E-07 | 8.93E-08 | 1.88E-07 |
| 24h | 1.71E-08  | 1.71E-08 | 4.33E-08 | 3.62E-08 |
| 36h | 7.96E-08  | 7.96E-08 | 1.85E-07 | 1.64E-07 |
| 48h | 5.36E-08  | 5.36E-08 | 4.09E-08 | 5.68E-08 |
| 72h | 4.08E-08  | 4.08E-08 | 1.68E-07 | 1.20E-07 |
|     | cgd5_2590 |          |          |          |
| 2h  | 3.64E-05  | 3.64E-05 | 1.28E-06 | 5.36E-06 |
| 6h  | 6.41E-05  | 6.41E-05 | 2.14E-05 | 1.07E-05 |
| 12h | 1.05E-05  | 1.05E-05 | 4.55E-06 | 2.25E-06 |
| 24h | 4.32E-06  | 4.32E-06 | 1.34E-05 | 6.34E-06 |
| 36h | 9.76E-06  | 9.76E-06 | 1.76E-05 | 1.21E-05 |
| 48h | 3.04E-05  | 3.04E-05 | 1.37E-05 | 8.86E-06 |
| 72h | 1.27E-05  | 1.27E-05 | 8.26E-06 | 7.98E-06 |
|     | cgd5_2600 |          |          |          |
| 2h  | 6.30E-07  | 6.30E-07 | 4.10E-07 | 3.54E-07 |
| 6h  | 1.20E-05  | 1.20E-05 | 7.51E-06 | 4.77E-06 |
| 12h | 1.85E-07  | 1.85E-07 | 4.63E-07 | 5.12E-07 |
| 24h | 1.73E-06  | 1.73E-06 | 4.14E-06 | 2.53E-06 |

|     |           |          |          |          |
|-----|-----------|----------|----------|----------|
| 36h | 7.44E-07  | 7.44E-07 | 2.80E-06 | 2.12E-06 |
| 48h | 1.98E-06  | 1.98E-06 | 1.98E-06 | 1.90E-06 |
| 72h | 4.25E-07  | 4.25E-07 | 6.69E-07 | 2.65E-07 |
|     | cgd5_2610 |          |          |          |
| 2h  | 4.75E-03  | 4.75E-03 | 2.17E-04 | 1.10E-04 |
| 6h  | 3.03E-03  | 3.03E-03 | 8.65E-04 | 8.31E-04 |
| 12h | 6.19E-05  | 6.19E-05 | 7.10E-05 | 7.71E-06 |
| 24h | 7.04E-04  | 7.04E-04 | 9.42E-04 | 3.00E-04 |
| 36h | 3.48E-04  | 3.48E-04 | 3.67E-04 | 1.93E-04 |
| 48h | 7.54E-04  | 7.54E-04 | 3.80E-04 | 2.82E-04 |
| 72h | 9.26E-05  | 9.26E-05 | 1.04E-04 | 7.63E-05 |
|     | cgd5_2640 |          |          |          |
| 2h  | 3.41E-03  | 3.41E-03 | 4.99E-05 | 1.26E-04 |
| 6h  | 5.18E-02  | 5.18E-02 | 3.35E-03 | 1.20E-03 |
| 12h | 1.01E-04  | 1.01E-04 | 5.01E-04 | 1.40E-04 |
| 24h | 7.28E-04  | 7.28E-04 | 1.41E-03 | 8.71E-04 |
| 36h | 1.25E-04  | 1.25E-04 | 4.07E-04 | 1.65E-04 |
| 48h | 3.92E-04  | 3.92E-04 | 4.54E-04 | 3.46E-04 |
| 72h | 2.88E-05  | 2.88E-05 | 7.00E-05 | 2.80E-05 |
|     | cgd5_2650 |          |          |          |
| 2h  | 2.95E-07  | 2.95E-07 | 1.06E-07 | 7.87E-08 |
| 6h  | 2.70E-06  | 2.70E-06 | 3.64E-06 | 1.74E-06 |
| 12h | 5.56E-08  | 5.56E-08 | 1.51E-07 | 5.74E-08 |
| 24h | 2.75E-07  | 2.75E-07 | 1.86E-06 | 1.12E-06 |
| 36h | 1.84E-07  | 1.84E-07 | 5.67E-07 | 2.80E-07 |
| 48h | 2.95E-07  | 2.95E-07 | 6.76E-07 | 6.38E-07 |
| 72h | 7.75E-08  | 7.75E-08 | 2.61E-07 | 8.95E-08 |
|     | cgd5_2660 |          |          |          |
| 2h  | 0.00E+00  | 2.00E-06 | 0.00E+00 | 0.00E+00 |
| 6h  | 9.44E-07  | 9.44E-07 | 6.63E-08 | 5.99E-08 |
| 12h | 0.00E+00  | 1.23E-07 | 0.00E+00 | 1.56E-08 |
| 24h | 3.34E-07  | 3.34E-07 | 4.38E-07 | 4.11E-08 |
| 36h | 1.60E-06  | 1.60E-06 | 2.76E-06 | 5.19E-07 |
| 48h | 1.21E-05  | 1.21E-05 | 5.18E-05 | 1.39E-05 |
| 72h | 1.31E-04  | 1.31E-04 | 1.94E-05 | 9.68E-06 |
|     | cgd5_2670 |          |          |          |
| 2h  | 5.50E-05  | 0.00E+00 | 4.20E-04 | 1.66E-05 |
| 6h  | 5.23E-03  | 4.47E-03 | 8.74E-03 | 1.76E-03 |
| 12h | 6.61E-04  | 2.35E-03 | 1.89E-03 | 3.40E-04 |
| 24h | 6.86E-04  | 4.54E-03 | 4.04E-03 | 1.05E-03 |
| 36h | 2.95E-04  | 3.14E-03 | 4.46E-03 | 1.58E-03 |
| 48h | 1.69E-03  | 4.09E-03 | 6.68E-03 | 2.13E-03 |
| 72h | 2.30E-04  | 2.12E-03 | 1.48E-03 | 2.42E-03 |
|     | cgd1_3480 |          |          |          |
| 2h  | 2.28E-04  | 2.02E-04 | 1.24E-03 | 1.29E-04 |
| 6h  | 5.87E-04  | 3.64E-04 | 1.11E-03 | 1.90E-04 |
| 12h | 2.98E-05  | 9.21E-05 | 1.75E-04 | 1.09E-05 |
| 24h | 1.30E-03  | 2.05E-04 | 7.42E-04 | 3.78E-05 |
| 36h | 5.33E-05  | 1.34E-04 | 2.60E-04 | 2.87E-05 |
| 48h | 2.98E-05  | 3.95E-05 | 1.27E-04 | 1.25E-05 |
| 72h | 2.04E-05  | 9.14E-06 | 2.53E-05 | 8.99E-06 |
|     | cgd1_3490 |          |          |          |
| 2h  | 0.00E+00  | 0.00E+00 | 0.00E+00 | 0.00E+00 |

|     |           |          |          |          |
|-----|-----------|----------|----------|----------|
| 6h  | 0.00E+00  | 2.58E-08 | 0.00E+00 | 2.43E-08 |
| 12h | 7.22E-06  | 1.84E-05 | 1.44E-05 | 1.02E-05 |
| 24h | 3.26E-06  | 2.33E-06 | 4.35E-06 | 1.74E-06 |
| 36h | 1.50E-06  | 9.67E-06 | 2.17E-05 | 2.37E-06 |
| 48h | 9.63E-07  | 2.18E-06 | 4.80E-06 | 1.02E-06 |
| 72h | 5.39E-07  | 1.51E-06 | 3.01E-06 | 2.20E-07 |
|     | cgd1_3650 |          |          |          |
| 2h  | 9.39E-07  | 2.54E-06 | 3.40E-07 | 5.31E-07 |
| 6h  | 3.78E-06  | 7.29E-07 | 4.24E-07 | 5.60E-07 |
| 12h | 7.55E-06  | 8.69E-06 | 7.12E-06 | 1.05E-04 |
| 24h | 5.23E-06  | 1.09E-06 | 2.38E-06 | 2.31E-06 |
| 36h | 9.80E-07  | 1.16E-06 | 9.91E-07 | 1.74E-06 |
| 48h | 6.10E-07  | 4.06E-07 | 1.00E-06 | 5.37E-07 |
| 72h | 4.57E-07  | 1.32E-07 | 3.26E-07 | 1.95E-07 |
|     | cgd1_3670 |          |          |          |
| 2h  | 1.03E-05  | 2.02E-05 | 5.43E-06 | 1.52E-05 |
| 6h  | 1.17E-05  | 6.82E-06 | 7.36E-06 | 1.73E-05 |
| 12h | 2.64E-06  | 2.49E-06 | 4.86E-06 | 4.94E-06 |
| 24h | 2.71E-06  | 2.80E-06 | 1.59E-05 | 1.81E-05 |
| 36h | 6.61E-06  | 5.62E-06 | 4.70E-06 | 8.35E-06 |
| 48h | 3.25E-06  | 3.11E-06 | 9.09E-06 | 5.18E-06 |
| 72h | 3.40E-05  | 4.12E-06 | 1.61E-05 | 1.15E-05 |
|     | cgd5_910  |          |          |          |
| 2h  | 9.81E-08  | 0.00E+00 | 0.00E+00 | 2.09E-08 |
| 6h  | 0.00E+00  | 6.34E-09 | 0.00E+00 | 2.37E-10 |
| 12h | 7.00E-09  | 0.00E+00 | 0.00E+00 | 1.03E-08 |
| 24h | 1.15E-07  | 3.02E-09 | 2.05E-07 | 4.68E-08 |
| 36h | 4.03E-07  | 9.92E-08 | 1.49E-07 | 1.29E-07 |
| 48h | 1.87E-06  | 1.06E-06 | 3.98E-06 | 7.97E-07 |
| 72h | 3.56E-07  | 2.27E-07 | 8.98E-07 | 2.84E-07 |
|     | cgd5_930  |          |          |          |
| 2h  | 2.53E-04  | 8.10E-05 | 1.26E-05 | 8.27E-05 |
| 6h  | 5.04E-04  | 6.86E-05 | 2.94E-04 | 2.86E-04 |
| 12h | 2.04E-04  | 1.36E-05 | 2.25E-04 | 1.52E-04 |
| 24h | 2.82E-04  | 1.02E-04 | 8.45E-04 | 3.00E-04 |
| 36h | 5.92E-05  | 5.47E-05 | 3.59E-04 | 9.95E-05 |
| 48h | 2.67E-04  | 7.64E-05 | 2.36E-04 | 1.28E-04 |
| 72h | 1.17E-04  | 7.83E-05 | 1.04E-04 | 8.35E-05 |
|     | cgd5_940  |          |          |          |
| 2h  | 2.37E-06  | 1.05E-06 | 4.17E-07 | 2.36E-06 |
| 6h  | 5.03E-06  | 4.70E-06 | 1.36E-05 | 1.12E-05 |
| 12h | 7.45E-06  | 8.18E-06 | 4.30E-06 | 5.26E-06 |
| 24h | 3.45E-06  | 5.22E-06 | 1.15E-05 | 8.07E-06 |
| 36h | 4.87E-06  | 3.56E-06 | 7.39E-06 | 8.98E-06 |
| 48h | 3.98E-06  | 3.93E-06 | 5.25E-06 | 4.84E-06 |
| 72h | 3.43E-06  | 5.46E-06 | 5.78E-06 | 4.71E-06 |
|     | cgd5_950  |          |          |          |
| 2h  | 1.11E-06  | 2.14E-07 | 2.55E-07 | 2.01E-06 |
| 6h  | 1.39E-07  | 6.81E-08 | 2.67E-07 | 3.69E-07 |
| 12h | 5.85E-07  | 2.44E-07 | 1.23E-06 | 8.33E-07 |
| 24h | 4.44E-07  | 6.34E-07 | 2.41E-06 | 5.48E-07 |
| 36h | 2.62E-06  | 1.37E-06 | 2.78E-06 | 2.00E-06 |
| 48h | 1.18E-06  | 6.45E-07 | 1.57E-06 | 6.48E-07 |

|     |           |          |          |          |
|-----|-----------|----------|----------|----------|
| 72h | 4.10E-06  | 2.89E-06 | 6.19E-06 | 2.56E-06 |
|     | cgd5_960  |          |          |          |
| 2h  | 4.04E-07  | 6.49E-08 | 9.63E-08 | 2.11E-07 |
| 6h  | 9.23E-08  | 8.20E-08 | 1.25E-07 | 1.87E-08 |
| 12h | 2.78E-08  | 1.12E-07 | 2.79E-07 | 1.62E-07 |
| 24h | 1.14E-07  | 1.50E-07 | 6.98E-07 | 1.93E-07 |
| 36h | 1.18E-06  | 9.24E-07 | 1.56E-06 | 1.53E-06 |
| 48h | 5.86E-07  | 2.70E-07 | 4.91E-07 | 2.10E-07 |
| 72h | 1.81E-06  | 1.74E-06 | 2.20E-06 | 8.77E-07 |
|     | cgd5_990  |          |          |          |
| 2h  | 5.61E-06  | 3.15E-06 | 2.10E-06 | 7.21E-06 |
| 6h  | 8.46E-06  | 5.55E-06 | 4.83E-06 | 4.85E-06 |
| 12h | 1.65E-07  | 2.85E-07 | 1.67E-06 | 2.84E-06 |
| 24h | 9.59E-07  | 3.81E-07 | 5.89E-06 | 2.35E-06 |
| 36h | 2.65E-06  | 2.46E-06 | 5.79E-06 | 2.80E-06 |
| 48h | 1.92E-06  | 7.96E-07 | 2.95E-06 | 1.07E-06 |
| 72h | 8.23E-07  | 1.62E-06 | 7.12E-07 | 1.83E-06 |
|     | cgd5_1000 |          |          |          |
| 2h  | 9.02E-09  | 2.80E-08 | 0.00E+00 | 1.19E-08 |
| 6h  | 0.00E+00  | 0.00E+00 | 0.00E+00 | 2.64E-08 |
| 12h | 3.96E-05  | 2.02E-05 | 4.91E-05 | 2.53E-05 |
| 24h | 2.93E-06  | 2.32E-06 | 5.12E-06 | 1.43E-06 |
| 36h | 6.15E-06  | 5.95E-06 | 4.77E-05 | 1.76E-05 |
| 48h | 2.03E-06  | 5.41E-07 | 6.96E-06 | 2.14E-06 |
| 72h | 3.46E-06  | 3.28E-06 | 5.29E-06 | 2.37E-06 |
|     | cgd5_1010 |          |          |          |
| 2h  | 7.45E-07  | 1.45E-07 | 1.66E-07 | 6.44E-07 |
| 6h  | 2.13E-06  | 1.24E-06 | 1.67E-06 | 2.79E-06 |
| 12h | 4.72E-05  | 2.50E-05 | 2.40E-05 | 1.36E-05 |
| 24h | 2.48E-06  | 1.98E-06 | 3.51E-06 | 1.56E-06 |
| 36h | 6.39E-06  | 5.64E-06 | 1.13E-05 | 5.53E-05 |
| 48h | 4.96E-06  | 1.38E-06 | 6.38E-06 | 4.00E-06 |
| 72h | 9.57E-07  | 2.07E-06 | 1.52E-06 | 6.82E-07 |
|     | cgd5_1020 |          |          |          |
| 2h  | 3.23E-07  | 3.04E-07 | 4.85E-07 | 3.39E-07 |
| 6h  | 1.10E-06  | 1.39E-06 | 2.60E-06 | 1.93E-06 |
| 12h | 1.82E-05  | 3.11E-05 | 2.35E-05 | 1.82E-05 |
| 24h | 3.73E-06  | 2.12E-06 | 5.41E-06 | 3.10E-06 |
| 36h | 2.74E-06  | 3.27E-06 | 1.85E-05 | 1.05E-05 |
| 48h | 3.82E-06  | 1.45E-06 | 6.23E-06 | 3.41E-06 |
| 72h | 5.19E-07  | 1.28E-06 | 8.56E-07 | 4.46E-07 |
|     | cgd5_1040 |          |          |          |
| 2h  | 1.96E-05  | 4.80E-06 | 4.65E-07 | 2.32E-06 |
| 6h  | 8.66E-05  | 3.54E-05 | 1.72E-04 | 9.89E-05 |
| 12h | 6.26E-05  | 5.54E-05 | 1.04E-04 | 1.04E-04 |
| 24h | 5.08E-05  | 1.93E-05 | 2.48E-04 | 7.75E-05 |
| 36h | 4.68E-05  | 4.16E-05 | 1.10E-04 | 5.08E-05 |
| 48h | 3.07E-05  | 1.78E-05 | 6.88E-05 | 2.37E-05 |
| 72h | 4.66E-06  | 4.28E-06 | 1.04E-05 | 2.96E-06 |
|     | cgd5_1070 |          |          |          |
| 2h  | 4.09E-04  | 3.18E-04 | 7.07E-05 | 2.11E-04 |
| 6h  | 2.76E-04  | 3.08E-05 | 1.14E-03 | 1.78E-04 |
| 12h | 8.65E-05  | 4.07E-05 | 1.68E-03 | 1.61E-04 |

|           |          |          |          |          |
|-----------|----------|----------|----------|----------|
| 24h       | 4.87E-04 | 5.75E-05 | 5.93E-04 | 1.54E-04 |
| 36h       | 1.13E-04 | 6.73E-05 | 2.79E-04 | 8.72E-05 |
| 48h       | 5.35E-04 | 2.58E-05 | 5.12E-04 | 8.29E-05 |
| 72h       | 7.52E-05 | 1.24E-05 | 5.98E-05 | 1.47E-05 |
| cgd5_1090 |          |          |          |          |
| 2h        | 2.04E-06 | 1.61E-06 | 1.81E-06 | 9.61E-07 |
| 6h        | 6.55E-07 | 3.39E-07 | 1.65E-06 | 8.49E-07 |
| 12h       | 1.71E-05 | 1.58E-05 | 1.53E-05 | 2.87E-06 |
| 24h       | 5.22E-06 | 5.63E-07 | 7.11E-06 | 2.14E-06 |
| 36h       | 1.92E-05 | 3.56E-06 | 1.17E-05 | 2.80E-06 |
| 48h       | 1.87E-05 | 1.05E-06 | 1.22E-05 | 1.80E-06 |
| 72h       | 1.48E-05 | 1.69E-06 | 2.48E-05 | 2.77E-06 |
| cgd5_1100 |          |          |          |          |
| 2h        | 0.00E+00 | 0.00E+00 | 5.05E-09 | 4.75E-08 |
| 6h        | 0.00E+00 | 5.89E-09 | 0.00E+00 | 1.32E-08 |
| 12h       | 1.28E-06 | 1.43E-06 | 1.11E-06 | 1.74E-07 |
| 24h       | 4.45E-07 | 2.20E-07 | 5.89E-07 | 2.05E-07 |
| 36h       | 4.91E-08 | 2.80E-07 | 1.03E-06 | 1.27E-06 |
| 48h       | 2.53E-07 | 2.79E-07 | 5.64E-07 | 1.53E-07 |
| 72h       | 2.86E-08 | 8.45E-08 | 5.11E-08 | 1.98E-07 |
| cgd5_1120 |          |          |          |          |
| 2h        | 1.75E-06 | 5.37E-07 | 9.45E-08 | 4.65E-07 |
| 6h        | 1.98E-06 | 3.88E-07 | 1.14E-06 | 1.18E-06 |
| 12h       | 3.74E-07 | 4.28E-08 | 3.93E-07 | 2.53E-07 |
| 24h       | 9.55E-07 | 8.65E-07 | 1.26E-06 | 8.14E-07 |
| 36h       | 4.49E-07 | 5.92E-07 | 5.21E-07 | 4.05E-07 |
| 48h       | 3.69E-07 | 5.87E-07 | 5.76E-07 | 9.10E-07 |
| 72h       | 9.85E-08 | 1.45E-07 | 7.16E-08 | 5.58E-08 |
| cgd5_1130 |          |          |          |          |
| 2h        | 2.13E-07 | 3.46E-07 | 3.72E-08 | 2.74E-07 |
| 6h        | 4.69E-07 | 1.13E-06 | 2.00E-06 | 8.03E-07 |
| 12h       | 1.12E-07 | 6.92E-08 | 2.08E-07 | 1.19E-07 |
| 24h       | 4.10E-07 | 7.00E-07 | 1.51E-06 | 9.54E-07 |
| 36h       | 2.78E-07 | 3.71E-07 | 4.40E-07 | 3.38E-07 |
| 48h       | 1.23E-07 | 6.22E-07 | 2.73E-07 | 4.91E-07 |
| 72h       | 7.54E-08 | 1.30E-07 | 1.90E-07 | 9.29E-07 |
| cgd5_1140 |          |          |          |          |
| 2h        | 0.00E+00 | 0.00E+00 | 0.00E+00 | 1.14E-05 |
| 6h        | 4.49E-06 | 1.35E-04 | 2.63E-05 | 9.22E-05 |
| 12h       | 3.03E-07 | 3.92E-06 | 4.74E-06 | 1.51E-06 |
| 24h       | 3.06E-06 | 1.28E-05 | 3.22E-05 | 3.41E-05 |
| 36h       | 6.00E-06 | 4.30E-05 | 2.82E-05 | 3.37E-05 |
| 48h       | 2.46E-06 | 4.16E-05 | 1.79E-05 | 2.45E-05 |
| 72h       | 2.20E-06 | 1.02E-05 | 1.59E-05 | 7.28E-06 |
| cgd5_1160 |          |          |          |          |
| 2h        | 4.08E-06 | 7.16E-06 | 2.17E-06 | 1.91E-06 |
| 6h        | 3.62E-06 | 1.08E-05 | 9.15E-06 | 9.31E-06 |
| 12h       | 4.71E-07 | 2.54E-08 | 7.91E-06 | 2.66E-06 |
| 24h       | 8.66E-07 | 5.51E-06 | 1.55E-05 | 4.97E-06 |
| 36h       | 8.99E-07 | 3.53E-06 | 4.19E-06 | 2.78E-06 |
| 48h       | 1.99E-07 | 2.01E-06 | 2.42E-06 | 2.23E-06 |
| 72h       | 7.36E-08 | 5.56E-07 | 3.06E-07 | 1.18E-07 |
| cgd5_1170 |          |          |          |          |

|     |           |          |          |          |
|-----|-----------|----------|----------|----------|
| 2h  | 5.32E-07  | 4.18E-07 | 5.25E-08 | 1.13E-06 |
| 6h  | 4.24E-06  | 1.37E-05 | 1.44E-05 | 7.69E-06 |
| 12h | 2.03E-07  | 6.67E-08 | 2.77E-06 | 1.16E-06 |
| 24h | 1.53E-06  | 3.52E-06 | 3.13E-05 | 9.49E-06 |
| 36h | 4.55E-06  | 6.44E-06 | 6.41E-06 | 1.39E-05 |
| 48h | 3.72E-06  | 3.57E-06 | 1.21E-05 | 6.93E-06 |
| 72h | 1.04E-06  | 2.76E-06 | 3.45E-06 | 2.48E-06 |
|     | cgd5_1180 |          |          |          |
| 2h  | 2.79E-06  | 2.66E-05 | 0.00E+00 | 0.00E+00 |
| 6h  | 1.28E-04  | 9.46E-05 | 1.43E-04 | 8.07E-04 |
| 12h | 3.23E-06  | 4.53E-05 | 2.29E-05 | 4.22E-05 |
| 24h | 4.53E-05  | 6.83E-05 | 1.29E-04 | 1.81E-04 |
| 36h | 4.04E-05  | 8.14E-05 | 3.79E-05 | 4.06E-04 |
| 48h | 9.13E-05  | 2.99E-05 | 2.08E-05 | 2.63E-04 |
| 72h | 1.40E-05  | 9.38E-06 | 1.98E-05 | 1.85E-04 |
|     | cgd5_1190 |          |          |          |
| 2h  | 3.62E-05  | 1.61E-05 | 4.79E-06 | 1.56E-05 |
| 6h  | 3.92E-06  | 4.40E-06 | 5.12E-06 | 6.54E-06 |
| 12h | 1.97E-05  | 1.01E-05 | 2.40E-05 | 1.61E-05 |
| 24h | 1.30E-05  | 1.46E-05 | 3.04E-05 | 1.39E-05 |
| 36h | 6.97E-06  | 8.69E-06 | 7.16E-06 | 9.15E-06 |
| 48h | 5.00E-06  | 4.84E-06 | 7.54E-06 | 1.02E-05 |
| 72h | 1.08E-06  | 1.79E-06 | 1.61E-06 | 1.27E-06 |
|     | cgd5_1200 |          |          |          |
| 2h  | 2.10E-04  | 3.69E-04 | 2.05E-04 | 8.36E-04 |
| 6h  | 3.43E-05  | 7.87E-05 | 1.34E-04 | 2.40E-04 |
| 12h | 1.67E-04  | 4.20E-04 | 3.97E-04 | 4.14E-04 |
| 24h | 1.33E-04  | 4.89E-04 | 7.74E-04 | 3.78E-04 |
| 36h | 3.88E-05  | 3.42E-04 | 1.46E-04 | 3.33E-04 |
| 48h | 7.98E-05  | 2.85E-04 | 1.74E-04 | 2.39E-04 |
| 72h | 9.41E-06  | 8.54E-05 | 5.14E-05 | 3.42E-05 |
|     | cgd5_1210 |          |          |          |
| 2h  | 1.84E-06  | 9.67E-06 | 1.38E-07 | 5.43E-06 |
| 6h  | 9.06E-08  | 1.21E-07 | 1.93E-07 | 2.14E-07 |
| 12h | 3.79E-08  | 3.67E-08 | 2.20E-07 | 8.40E-07 |
| 24h | 4.39E-07  | 1.86E-07 | 8.68E-07 | 4.56E-07 |
| 36h | 2.59E-07  | 3.69E-07 | 5.88E-07 | 1.12E-06 |
| 48h | 6.04E-05  | 6.57E-05 | 3.35E-05 | 3.18E-05 |
| 72h | 1.15E-06  | 5.69E-06 | 2.57E-06 | 4.35E-06 |
|     | cgd5_1230 |          |          |          |
| 2h  | 3.41E-05  | 1.10E-04 | 2.02E-04 | 5.35E-04 |
| 6h  | 4.31E-05  | 5.62E-05 | 1.45E-04 | 6.58E-05 |
| 12h | 1.46E-05  | 1.14E-05 | 8.10E-05 | 3.39E-05 |
| 24h | 2.56E-05  | 4.58E-04 | 1.55E-04 | 1.02E-04 |
| 36h | 8.14E-06  | 6.35E-05 | 9.65E-05 | 5.40E-05 |
| 48h | 4.05E-05  | 7.86E-05 | 9.51E-05 | 9.24E-05 |
| 72h | 1.39E-06  | 1.43E-05 | 2.34E-05 | 8.79E-06 |
|     | cgd5_1240 |          |          |          |
| 2h  | 6.00E-06  | 1.81E-06 | 6.96E-06 | 2.07E-06 |
| 6h  | 1.24E-06  | 3.81E-07 | 1.04E-06 | 1.09E-06 |
| 12h | 1.15E-06  | 3.31E-07 | 2.49E-06 | 9.40E-07 |
| 24h | 2.56E-06  | 5.14E-07 | 3.52E-06 | 1.45E-06 |
| 36h | 5.17E-07  | 1.05E-06 | 1.07E-06 | 8.76E-07 |



|     |           |          |          |          |
|-----|-----------|----------|----------|----------|
| 48h | 1.94E-06  | 8.10E-07 | 7.95E-07 | 6.94E-07 |
| 72h | 5.39E-07  | 6.85E-07 | 3.15E-05 | 2.26E-07 |
|     | cgd8_3640 |          |          |          |
| 2h  | 4.29E-06  | 1.55E-06 | 7.93E-07 | 4.00E-06 |
| 6h  | 6.96E-06  | 6.68E-06 | 8.20E-06 | 1.45E-05 |
| 12h | 8.43E-07  | 9.33E-07 | 3.22E-06 | 2.17E-06 |
| 24h | 3.22E-06  | 4.01E-06 | 5.99E-06 | 3.29E-06 |
| 36h | 2.86E-06  | 4.22E-06 | 3.48E-06 | 5.68E-06 |
| 48h | 4.45E-06  | 1.41E-06 | 2.42E-06 | 2.89E-06 |
| 72h | 4.01E-07  | 4.11E-07 | 4.22E-07 | 2.06E-07 |
|     | cgd8_3650 |          |          |          |
| 2h  | 6.25E-07  | 3.69E-07 | 1.05E-07 | 5.27E-06 |
| 6h  | 8.90E-07  | 1.09E-06 | 1.10E-06 | 7.76E-07 |
| 12h | 1.37E-07  | 4.68E-08 | 2.02E-07 | 3.15E-08 |
| 24h | 2.82E-07  | 6.14E-07 | 4.94E-07 | 6.72E-07 |
| 36h | 7.47E-07  | 3.88E-07 | 3.29E-07 | 1.13E-06 |
| 48h | 5.74E-07  | 1.04E-07 | 2.74E-07 | 3.46E-07 |
| 72h | 2.17E-07  | 2.79E-07 | 2.10E-07 | 8.38E-08 |
|     | cgd8_3660 |          |          |          |
| 2h  | 1.09E-03  | 3.40E-04 | 1.75E-04 | 1.25E-03 |
| 6h  | 6.56E-05  | 3.68E-05 | 1.13E-04 | 1.22E-04 |
| 12h | 1.37E-04  | 1.21E-04 | 3.31E-04 | 5.06E-05 |
| 24h | 3.07E-04  | 5.53E-04 | 4.51E-04 | 2.15E-04 |
| 36h | 1.33E-04  | 1.03E-04 | 1.51E-04 | 1.85E-04 |
| 48h | 1.99E-04  | 3.68E-05 | 2.43E-04 | 2.17E-04 |
| 72h | 8.60E-05  | 5.31E-05 | 4.37E-05 | 5.62E-05 |
|     | cgd8_3670 |          |          |          |
| 2h  | 5.60E-07  | 6.03E-07 | 3.65E-06 | 0.00E+00 |
| 6h  | 1.77E-07  | 2.07E-06 | 0.00E+00 | 0.00E+00 |
| 12h | 7.41E-06  | 1.12E-04 | 1.91E-05 | 6.36E-06 |
| 24h | 1.00E-05  | 4.54E-06 | 1.81E-05 | 3.16E-05 |
| 36h | 3.36E-05  | 3.09E-05 | 4.16E-05 | 3.39E-05 |
| 48h | 5.01E-04  | 6.88E-05 | 1.83E-04 | 7.06E-05 |
| 72h | 7.26E-05  | 6.53E-05 | 6.99E-05 | 2.27E-05 |
|     | cgd8_3680 |          |          |          |
| 2h  | 2.58E-08  | 1.69E-07 | 1.39E-07 | 2.02E-05 |
| 6h  | 6.03E-07  | 2.02E-06 | 7.37E-07 | 8.76E-06 |
| 12h | 2.40E-07  | 1.54E-07 | 3.24E-07 | 1.29E-07 |
| 24h | 3.12E-07  | 3.15E-07 | 1.53E-06 | 1.68E-06 |
| 36h | 8.16E-07  | 1.26E-06 | 6.93E-07 | 8.63E-07 |
| 48h | 2.81E-06  | 2.61E-06 | 2.69E-06 | 2.60E-06 |
| 72h | 5.41E-07  | 3.09E-07 | 7.62E-07 | 2.72E-07 |
|     | cgd8_3690 |          |          |          |
| 2h  | 9.87E-08  | 2.96E-07 | 1.31E-08 | 1.42E-06 |
| 6h  | 1.54E-07  | 3.68E-07 | 5.08E-07 | 2.33E-07 |
| 12h | 1.09E-07  | 5.01E-07 | 4.22E-07 | 3.60E-08 |
| 24h | 6.63E-07  | 1.56E-07 | 2.07E-07 | 4.40E-07 |
| 36h | 2.54E-07  | 3.53E-07 | 3.15E-07 | 5.38E-07 |
| 48h | 8.05E-07  | 2.90E-07 | 8.60E-07 | 6.20E-07 |
| 72h | 1.22E-07  | 3.76E-07 | 3.11E-07 | 1.01E-07 |
|     | cgd8_3710 |          |          |          |
| 2h  | 0.00E+00  | 3.34E-09 | 0.00E+00 | 4.47E-08 |
| 6h  | 6.20E-09  | 0.00E+00 | 0.00E+00 | 7.75E-10 |

|     |           |          |          |          |
|-----|-----------|----------|----------|----------|
| 12h | 6.69E-07  | 1.30E-06 | 4.86E-07 | 1.16E-07 |
| 24h | 6.89E-08  | 1.51E-07 | 1.17E-07 | 1.00E-07 |
| 36h | 9.99E-08  | 2.01E-07 | 3.77E-07 | 2.62E-07 |
| 48h | 4.80E-08  | 3.22E-08 | 1.34E-07 | 4.74E-08 |
| 72h | 1.47E-08  | 7.53E-08 | 1.82E-08 | 1.61E-07 |
|     | cgd8_3720 |          |          |          |
| 2h  | 6.21E-06  | 2.91E-05 | 4.05E-06 | 3.56E-04 |
| 6h  | 8.87E-06  | 2.80E-05 | 1.13E-04 | 1.04E-04 |
| 12h | 8.29E-05  | 2.26E-04 | 1.74E-04 | 2.42E-05 |
| 24h | 7.33E-05  | 1.23E-04 | 5.81E-05 | 1.88E-04 |
| 36h | 4.16E-05  | 1.67E-04 | 2.29E-04 | 1.41E-04 |
| 48h | 1.02E-04  | 1.26E-04 | 9.25E-05 | 5.61E-05 |
| 72h | 5.39E-05  | 8.79E-05 | 9.90E-05 | 5.57E-05 |
|     | cgd8_3730 |          |          |          |
| 2h  | 1.39E-08  | 0.00E+00 | 0.00E+00 | 1.45E-07 |
| 6h  | 0.00E+00  | 0.00E+00 | 0.00E+00 | 8.76E-09 |
| 12h | 1.14E-05  | 1.74E-05 | 1.90E-05 | 2.20E-05 |
| 24h | 2.36E-06  | 2.59E-06 | 8.58E-07 | 1.19E-06 |
| 36h | 1.51E-06  | 2.40E-06 | 1.26E-05 | 1.94E-05 |
| 48h | 6.23E-07  | 6.78E-07 | 1.34E-06 | 6.58E-06 |
| 72h | 6.90E-07  | 8.63E-07 | 8.22E-07 | 1.16E-06 |
|     | cgd8_3740 |          |          |          |
| 2h  | 3.30E-05  | 1.42E-05 | 7.46E-06 | 6.32E-05 |
| 6h  | 9.33E-06  | 1.17E-05 | 2.04E-05 | 1.52E-05 |
| 12h | 3.23E-05  | 5.44E-05 | 2.48E-05 | 1.42E-05 |
| 24h | 1.85E-05  | 1.61E-05 | 2.32E-05 | 3.15E-05 |
| 36h | 8.87E-06  | 1.26E-05 | 1.01E-05 | 1.33E-05 |
| 48h | 6.37E-06  | 3.10E-06 | 5.63E-06 | 3.16E-06 |
| 72h | 7.98E-07  | 3.59E-01 | 2.41E-06 | 1.07E-06 |
|     | cgd8_3750 |          |          |          |
| 2h  | 1.09E-04  | 5.65E-05 | 7.28E-05 | 1.20E-04 |
| 6h  | 8.94E-06  | 1.36E-05 | 2.48E-05 | 1.04E-04 |
| 12h | 6.48E-05  | 6.62E-05 | 2.68E-05 | 6.86E-05 |
| 24h | 7.44E-05  | 3.98E-05 | 2.04E-05 | 3.26E-04 |
| 36h | 2.10E-05  | 2.33E-05 | 3.83E-05 | 1.82E-04 |
| 48h | 2.07E-05  | 7.64E-06 | 2.43E-05 | 2.03E-05 |
| 72h | 2.82E-06  | 3.26E-06 | 5.04E-06 | 2.98E-06 |
|     | cgd8_3760 |          |          |          |
| 2h  | 5.74E-06  | 6.33E-06 | 1.80E-06 | 1.50E-03 |
| 6h  | 6.93E-07  | 1.39E-06 | 2.83E-06 | 4.06E-07 |
| 12h | 2.95E-07  | 5.12E-07 | 1.01E-06 | 8.67E-08 |
| 24h | 1.15E-06  | 1.99E-06 | 1.57E-06 | 1.09E-06 |
| 36h | 1.88E-06  | 1.17E-06 | 1.04E-06 | 4.35E-05 |
| 48h | 1.33E-06  | 2.68E-07 | 1.90E-06 | 3.66E-07 |
| 72h | 5.25E-07  | 3.91E-07 | 4.82E-07 | 1.98E-07 |
|     | cgd5_2390 |          |          |          |
| 2h  | 5.45E-06  | 4.75E-06 | 1.41E-06 | 2.13E-06 |
| 6h  | 8.46E-07  | 1.61E-06 | 4.89E-07 | 2.83E-07 |
| 12h | 2.81E-07  | 2.99E-05 | 6.41E-07 | 4.26E-07 |
| 24h | 1.65E-06  | 1.09E-06 | 1.79E-06 | 1.77E-06 |
| 36h | 2.48E-07  | 2.14E-06 | 3.41E-07 | 1.22E-06 |
| 48h | 6.32E-07  | 3.90E-07 | 3.21E-07 | 3.30E-07 |
| 72h | 8.79E-08  | 1.52E-07 | 8.12E-08 | 7.27E-08 |

|     |           |          |          |          |
|-----|-----------|----------|----------|----------|
|     | cgd5_2400 |          |          |          |
| 2h  | 0.00E+00  | 0.00E+00 | 1.31E-07 | 1.86E-04 |
| 6h  | 0.00E+00  | 0.00E+00 | 0.00E+00 | 0.00E+00 |
| 12h | 2.46E-05  | 1.18E-04 | 2.05E-06 | 7.39E-05 |
| 24h | 3.95E-05  | 2.84E-05 | 1.10E-05 | 2.27E-04 |
| 36h | 1.02E-04  | 1.59E-05 | 5.14E-06 | 5.48E-04 |
| 48h | 2.11E-04  | 1.18E-05 | 2.50E-05 | 6.54E-04 |
| 72h | 1.51E-03  | 9.34E-05 | 2.84E-04 | 1.18E-03 |
|     | cgd5_2410 |          |          |          |
| 2h  | 0.00E+00  | 1.31E-06 | 0.00E+00 | 0.00E+00 |
| 6h  | 0.00E+00  | 0.00E+00 | 0.00E+00 | 0.00E+00 |
| 12h | 0.00E+00  | 3.97E-06 | 7.12E-06 | 1.14E-06 |
| 24h | 1.06E-06  | 3.13E-06 | 2.59E-06 | 2.03E-06 |
| 36h | 4.60E-06  | 9.12E-06 | 1.43E-05 | 5.07E-06 |
| 48h | 5.02E-06  | 1.02E-04 | 1.95E-05 | 2.10E-05 |
| 72h | 2.04E-05  | 8.79E-05 | 8.85E-05 | 5.27E-05 |
|     | cgd5_2420 |          |          |          |
| 2h  | 0.00E+00  | 0.00E+00 | 1.32E-06 | 0.00E+00 |
| 6h  | 1.93E-04  | 7.78E-04 | 7.06E-04 | 2.32E-04 |
| 12h | 5.63E-04  | 6.46E-04 | 4.16E-04 | 4.69E-04 |
| 24h | 1.14E-04  | 8.65E-04 | 3.16E-03 | 4.87E-04 |
| 36h | 4.43E-04  | 5.20E-04 | 1.69E-03 | 2.61E-03 |
| 48h | 1.71E-04  | 4.22E-04 | 8.50E-04 | 2.21E-03 |
| 72h | 3.59E-04  | 5.74E-04 | 8.81E-04 | 1.59E-03 |
|     | cgd5_2430 |          |          |          |
| 2h  | 1.26E-05  | 9.01E-06 | 6.15E-06 | 1.14E-05 |
| 6h  | 1.61E-05  | 6.64E-05 | 2.88E-05 | 1.25E-05 |
| 12h | 1.60E-06  | 1.26E-05 | 2.48E-05 | 8.24E-07 |
| 24h | 3.56E-06  | 4.95E-05 | 2.75E-05 | 6.33E-06 |
| 36h | 3.96E-06  | 8.11E-06 | 8.07E-06 | 1.26E-05 |
| 48h | 1.49E-06  | 9.98E-06 | 3.16E-06 | 6.30E-06 |
| 72h | 7.15E-06  | 8.16E-06 | 6.18E-06 | 1.20E-05 |
|     | cgd5_2440 |          |          |          |
| 2h  | 2.48E-07  | 5.07E-08 | 1.72E-07 | 6.66E-07 |
| 6h  | 2.05E-07  | 5.35E-08 | 1.03E-07 | 7.62E-08 |
| 12h | 1.03E-07  | 2.16E-07 | 9.73E-08 | 6.56E-08 |
| 24h | 1.98E-07  | 1.02E-07 | 1.15E-07 | 2.76E-07 |
| 36h | 1.38E-07  | 8.30E-08 | 1.01E-07 | 1.99E-07 |
| 48h | 7.84E-08  | 1.58E-07 | 1.52E-07 | 2.50E-07 |
| 72h | 6.13E-07  | 3.86E-07 | 2.13E-07 | 2.62E-07 |
|     | cgd5_2460 |          |          |          |
| 2h  | 3.76E-06  | 5.76E-06 | 1.65E-05 | 1.61E-05 |
| 6h  | 7.86E-06  | 1.15E-05 | 7.11E-06 | 4.06E-06 |
| 12h | 2.89E-06  | 8.85E-05 | 9.41E-06 | 2.55E-06 |
| 24h | 4.62E-06  | 4.12E-05 | 1.32E-05 | 7.71E-06 |
| 36h | 4.04E-06  | 1.28E-05 | 7.50E-06 | 7.01E-06 |
| 48h | 2.40E-06  | 1.34E-05 | 7.02E-06 | 6.50E-06 |
| 72h | 7.21E-06  | 7.50E-06 | 5.27E-06 | 3.47E-06 |
|     | cgd5_2470 |          |          |          |
| 2h  | 2.06E-06  | 6.88E-07 | 1.49E-06 | 2.25E-06 |
| 6h  | 1.82E-06  | 3.72E-07 | 5.13E-07 | 5.22E-07 |
| 12h | 6.22E-07  | 1.76E-06 | 1.55E-06 | 3.54E-07 |
| 24h | 1.18E-06  | 1.42E-06 | 1.40E-06 | 1.50E-06 |

|     |           |          |          |          |
|-----|-----------|----------|----------|----------|
| 36h | 8.70E-07  | 8.48E-07 | 4.76E-07 | 1.04E-06 |
| 48h | 4.81E-07  | 2.13E-06 | 1.00E-06 | 1.83E-06 |
| 72h | 3.49E-06  | 1.66E-06 | 2.27E-06 | 2.34E-06 |
|     | cgd5_2480 |          |          |          |
| 2h  | 3.34E-08  | 0.00E+00 | 9.58E-09 | 7.38E-08 |
| 6h  | 2.19E-05  | 5.92E-08 | 1.70E-07 | 2.58E-07 |
| 12h | 4.31E-08  | 6.97E-08 | 1.86E-08 | 5.67E-09 |
| 24h | 8.82E-08  | 4.17E-07 | 2.87E-07 | 1.51E-07 |
| 36h | 2.38E-07  | 1.11E-07 | 7.55E-08 | 8.45E-08 |
| 48h | 9.08E-08  | 1.91E-07 | 1.35E-07 | 3.05E-07 |
| 72h | 6.96E-07  | 2.23E-07 | 3.08E-07 | 3.41E-07 |
|     | cgd5_2490 |          |          |          |
| 2h  | 0.00E+00  | 0.00E+00 | 2.67E-06 | 3.87E-07 |
| 6h  | 5.53E-06  | 0.00E+00 | 4.17E-06 | 2.73E-06 |
| 12h | 2.71E-06  | 8.82E-06 | 2.35E-06 | 1.60E-06 |
| 24h | 1.50E-06  | 3.79E-05 | 1.69E-05 | 3.11E-06 |
| 36h | 4.16E-06  | 1.82E-05 | 2.42E-05 | 8.18E-06 |
| 48h | 2.66E-06  | 1.61E-05 | 1.97E-05 | 1.07E-05 |
| 72h | 4.08E-06  | 4.40E-05 | 1.94E-05 | 6.37E-06 |
|     | cgd5_2500 |          |          |          |
| 2h  | 0.00E+00  | 7.46E-07 | 1.36E-07 | 1.91E-07 |
| 6h  | 7.26E-07  | 1.61E-05 | 1.75E-06 | 2.71E-07 |
| 12h | 1.23E-07  | 2.18E-06 | 1.69E-07 | 6.75E-08 |
| 24h | 2.83E-07  | 9.78E-06 | 2.01E-06 | 3.11E-07 |
| 36h | 1.31E-06  | 5.40E-06 | 2.17E-06 | 1.81E-06 |
| 48h | 1.04E-06  | 8.42E-05 | 2.77E-06 | 1.60E-06 |
| 72h | 7.10E-07  | 1.14E-06 | 1.96E-06 | 2.08E-06 |
|     | cgd5_2510 |          |          |          |
| 2h  | 0.00E+00  | 2.71E-05 | 1.71E-05 | 2.22E-05 |
| 6h  | 9.50E-06  | 7.99E-05 | 4.84E-05 | 1.30E-05 |
| 12h | 1.46E-06  | 8.73E-05 | 1.93E-05 | 1.21E-06 |
| 24h | 3.78E-06  | 4.53E-04 | 1.01E-04 | 1.21E-05 |
| 36h | 1.96E-05  | 3.44E-04 | 8.05E-05 | 2.02E-05 |
| 48h | 8.00E-06  | 1.38E-04 | 6.25E-05 | 2.55E-05 |
| 72h | 2.92E-05  | 1.80E-04 | 7.72E-04 | 6.67E-05 |
|     | cgd6_640  |          |          |          |
| 2h  | 4.22E-06  | 6.21E-04 | 2.09E-06 | 4.78E-05 |
| 6h  | 9.65E-05  | 4.55E-04 | 9.99E-06 | 1.35E-05 |
| 12h | 4.27E-03  | 5.19E-04 | 6.04E-06 | 5.70E-05 |
| 24h | 2.36E-04  | 5.72E-04 | 8.40E-06 | 3.67E-05 |
| 36h | 3.11E-04  | 1.14E-04 | 1.02E-05 | 5.88E-05 |
| 48h | 3.32E-04  | 3.84E-05 | 5.91E-06 | 6.59E-05 |
| 72h | 4.47E-05  | 5.21E-04 | 4.37E-06 | 2.84E-05 |
|     | cgd6_670  |          |          |          |
| 2h  | 0.00E+00  | 0.00E+00 | 0.00E+00 | 0.00E+00 |
| 6h  | 0.00E+00  | 0.00E+00 | 0.00E+00 | 0.00E+00 |
| 12h | 0.00E+00  | 4.05E-09 | 2.16E-09 | 5.04E-09 |
| 24h | 1.77E-08  | 1.38E-08 | 9.06E-09 | 5.69E-09 |
| 36h | 2.59E-08  | 2.93E-08 | 8.76E-08 | 2.13E-08 |
| 48h | 2.33E-06  | 1.83E-07 | 2.16E-07 | 2.69E-07 |
| 72h | 1.04E-06  | 8.87E-07 | 7.22E-07 | 6.88E-07 |
|     | cgd6_680  |          |          |          |
| 2h  | 4.62E-07  | 2.36E-05 | 2.02E-07 | 2.77E-07 |

|     |          |          |          |          |          |
|-----|----------|----------|----------|----------|----------|
| 6h  |          | 8.61E-07 | 2.69E-07 | 7.74E-08 | 5.18E-08 |
| 12h |          | 2.23E-06 | 3.34E-07 | 6.98E-08 | 9.23E-08 |
| 24h |          | 9.30E-07 | 4.57E-07 | 2.25E-07 | 2.32E-07 |
| 36h |          | 1.67E-06 | 2.97E-07 | 8.50E-07 | 4.21E-07 |
| 48h |          | 3.35E-06 | 1.66E-07 | 5.91E-07 | 4.54E-07 |
| 72h |          | 6.29E-07 | 4.88E-07 | 3.51E-07 | 5.13E-07 |
|     | cgd6_690 |          |          |          |          |
| 2h  |          | 5.58E-09 | 8.31E-10 | 0.00E+00 | 1.03E-09 |
| 6h  |          | 1.35E-05 | 1.43E-06 | 1.54E-06 | 1.82E-06 |
| 12h |          | 6.91E-08 | 1.97E-07 | 1.16E-07 | 7.58E-08 |
| 24h |          | 5.66E-06 | 3.33E-06 | 4.30E-07 | 3.50E-07 |
| 36h |          | 4.80E-06 | 4.20E-07 | 1.63E-06 | 8.02E-07 |
| 48h |          | 1.46E-06 | 2.17E-07 | 4.81E-07 | 4.29E-07 |
| 72h |          | 4.71E-07 | 6.19E-07 | 4.76E-07 | 4.52E-07 |
|     | cgd6_710 |          |          |          |          |
| 2h  |          | 3.90E-08 | 0.00E+00 | 0.00E+00 | 0.00E+00 |
| 6h  |          | 0.00E+00 | 0.00E+00 | 1.77E-09 | 0.00E+00 |
| 12h |          | 0.00E+00 | 1.98E-08 | 6.28E-09 | 1.02E-09 |
| 24h |          | 9.90E-09 | 3.43E-07 | 2.18E-09 | 3.26E-09 |
| 36h |          | 5.28E-07 | 1.15E-07 | 1.31E-07 | 3.59E-08 |
| 48h |          | 5.35E-05 | 5.88E-06 | 3.71E-05 | 3.88E-05 |
| 72h |          | 7.19E-06 | 3.02E-06 | 2.18E-06 | 6.24E-06 |
|     | cgd6_720 |          |          |          |          |
| 2h  |          | 0.00E+00 | 3.68E-05 | 1.51E-06 | 4.42E-06 |
| 6h  |          | 5.02E-04 | 2.41E-04 | 1.24E-05 | 3.43E-05 |
| 12h |          | 7.97E-04 | 2.02E-05 | 3.53E-06 | 4.51E-05 |
| 24h |          | 1.01E-03 | 4.00E-04 | 1.45E-05 | 4.79E-05 |
| 36h |          | 7.12E-04 | 7.41E-05 | 8.34E-05 | 1.35E-04 |
| 48h |          | 5.86E-04 | 1.10E-04 | 3.83E-05 | 1.81E-04 |
| 72h |          | 8.24E-04 | 1.09E-04 | 6.91E-05 | 1.99E-04 |
|     | cgd6_740 |          |          |          |          |
| 2h  |          | 0.00E+00 | 0.00E+00 | 0.00E+00 | 0.00E+00 |
| 6h  |          | 0.00E+00 | 8.91E-07 | 0.00E+00 | 0.00E+00 |
| 12h |          | 0.00E+00 | 3.86E-06 | 0.00E+00 | 3.78E-08 |
| 24h |          | 1.54E-06 | 6.79E-06 | 8.35E-11 | 1.77E-09 |
| 36h |          | 4.23E-07 | 2.64E-06 | 1.75E-07 | 1.27E-07 |
| 48h |          | 2.19E-03 | 1.05E-04 | 1.56E-05 | 1.15E-04 |
| 72h |          | 5.68E-04 | 5.48E-04 | 1.20E-04 | 4.98E-04 |
|     | cgd6_760 |          |          |          |          |
| 2h  |          | 0.00E+00 | 3.81E-09 | 6.08E-08 | 1.51E-08 |
| 6h  |          | 2.15E-07 | 4.93E-07 | 7.06E-08 | 1.61E-08 |
| 12h |          | 5.11E-05 | 8.52E-06 | 4.63E-06 | 4.04E-06 |
| 24h |          | 2.60E-06 | 8.16E-06 | 1.75E-06 | 1.17E-06 |
| 36h |          | 3.37E-05 | 4.34E-06 | 3.49E-06 | 2.03E-06 |
| 48h |          | 3.84E-06 | 4.59E-06 | 0.00E+00 | 1.26E-06 |
| 72h |          | 8.19E-06 | 2.22E-06 | 2.29E-06 | 1.27E-06 |
|     | cgd6_770 |          |          |          |          |
| 2h  |          | 3.22E-08 | 3.01E-07 | 2.21E-07 | 1.80E-07 |
| 6h  |          | 7.24E-07 | 6.50E-08 | 6.44E-08 | 5.91E-08 |
| 12h |          | 1.88E-07 | 0.00E+00 | 7.72E-08 | 6.21E-09 |
| 24h |          | 4.30E-07 | 8.36E-08 | 3.75E-08 | 4.05E-08 |
| 36h |          | 6.40E-07 | 6.16E-06 | 6.65E-07 | 3.90E-07 |
| 48h |          | 3.46E-05 | 2.97E-04 | 2.63E-05 | 1.53E-05 |

|     |          |          |          |          |
|-----|----------|----------|----------|----------|
| 72h | 6.32E-06 | 1.13E-05 | 3.44E-06 | 6.60E-06 |
|     | cgd6_780 |          |          |          |
| 2h  | 7.60E-05 | 4.06E-04 | 1.58E-05 | 3.95E-05 |
| 6h  | 4.36E-07 | 1.33E-07 | 0.00E+00 | 3.33E-08 |
| 12h | 4.75E-06 | 1.86E-06 | 5.36E-07 | 4.21E-07 |
| 24h | 3.08E-06 | 5.50E-06 | 3.63E-07 | 1.98E-07 |
| 36h | 1.06E-05 | 4.48E-06 | 8.09E-07 | 7.61E-07 |
| 48h | 1.32E-05 | 2.79E-06 | 1.48E-06 | 1.04E-06 |
| 72h | 1.26E-05 | 1.36E-05 | 0.00E+00 | 1.61E-06 |
|     | cgd6_800 |          |          |          |
| 2h  | 0.00E+00 | 0.00E+00 | 0.00E+00 | 1.48E-08 |
| 6h  | 1.44E-07 | 2.27E-09 | 5.56E-09 | 0.00E+00 |
| 12h | 2.92E-07 | 1.70E-07 | 7.99E-08 | 4.56E-08 |
| 24h | 5.24E-07 | 8.77E-07 | 0.00E+00 | 6.68E-08 |
| 36h | 4.10E-06 | 6.27E-07 | 5.07E-07 | 1.00E-06 |
| 48h | 8.06E-06 | 3.54E-06 | 1.13E-06 | 3.71E-06 |
| 72h | 9.57E-06 | 7.76E-06 | 7.15E-07 | 4.00E-06 |
|     | cgd6_820 |          |          |          |
| 2h  | 0.00E+00 | 0.00E+00 | 0.00E+00 | 0.00E+00 |
| 6h  | 0.00E+00 | 0.00E+00 | 0.00E+00 | 0.00E+00 |
| 12h | 1.30E-07 | 1.48E-09 | 0.00E+00 | 3.49E-09 |
| 24h | 1.58E-07 | 2.18E-07 | 2.62E-09 | 8.94E-10 |
| 36h | 2.55E-07 | 2.31E-07 | 6.35E-08 | 3.59E-07 |
| 48h | 5.02E-05 | 8.41E-05 | 1.65E-06 | 3.83E-06 |
| 72h | 8.70E-05 | 8.36E-04 | 3.00E-06 | 1.71E-05 |
|     | cgd6_840 |          |          |          |
| 2h  | 3.80E-05 | 4.78E-08 | 0.00E+00 | 0.00E+00 |
| 6h  | 1.69E-05 | 1.60E-05 | 1.37E-05 | 3.68E-06 |
| 12h | 5.43E-05 | 1.57E-06 | 1.19E-07 | 3.41E-07 |
| 24h | 6.22E-05 | 2.85E-05 | 3.62E-06 | 1.20E-06 |
| 36h | 1.47E-05 | 6.52E-06 | 3.28E-06 | 1.97E-06 |
| 48h | 2.50E-05 | 5.37E-06 | 1.32E-06 | 6.18E-07 |
| 72h | 6.39E-06 | 4.65E-07 | 4.24E-07 | 6.80E-07 |
|     | cgd6_870 |          |          |          |
| 2h  | 0.00E+00 | 4.26E-08 | 6.77E-08 | 5.19E-08 |
| 6h  | 0.00E+00 | 1.24E-06 | 2.49E-06 | 5.40E-07 |
| 12h | 0.00E+00 | 4.57E-07 | 5.09E-08 | 4.59E-09 |
| 24h | 1.34E-08 | 3.55E-06 | 5.61E-07 | 4.36E-07 |
| 36h | 1.04E-08 | 7.97E-07 | 3.95E-07 | 3.43E-07 |
| 48h | 2.55E-07 | 1.41E-06 | 2.30E-07 | 4.10E-07 |
| 72h | 8.53E-07 | 1.25E-07 | 1.17E-07 | 2.40E-07 |
|     | cgd6_890 |          |          |          |
| 2h  | 2.72E-07 | 0.00E+00 | 0.00E+00 | 0.00E+00 |
| 6h  | 2.87E-07 | 0.00E+00 | 0.00E+00 | 0.00E+00 |
| 12h | 2.16E-07 | 2.62E-04 | 4.83E-06 | 2.16E-06 |
| 24h | 3.09E-07 | 5.90E-05 | 3.59E-07 | 3.31E-06 |
| 36h | 5.06E-07 | 4.64E-05 | 3.19E-06 | 9.36E-07 |
| 48h | 2.78E-07 | 6.28E-05 | 1.31E-06 | 4.16E-06 |
| 72h | 2.89E-07 | 6.27E-05 | 3.99E-06 | 5.05E-06 |
|     | cgd6_900 |          |          |          |
| 2h  | 0.00E+00 | 0.00E+00 | 0.00E+00 | 0.00E+00 |
| 6h  | 1.84E-06 | 5.54E-05 | 1.07E-03 | 2.27E-03 |
| 12h | 2.22E-07 | 9.03E-06 | 1.27E-05 | 3.54E-04 |

|     |          |          |          |          |
|-----|----------|----------|----------|----------|
| 24h | 1.14E-07 | 2.46E-05 | 1.82E-04 | 2.13E-05 |
| 36h | 1.87E-06 | 3.01E-05 | 2.77E-04 | 1.36E-04 |
| 48h | 2.08E-07 | 5.53E-05 | 4.00E-04 | 7.58E-05 |
| 72h | 4.64E-07 | 3.96E-05 | 4.86E-05 | 5.40E-04 |
|     | cgd6_910 |          |          |          |
| 2h  | 0.00E+00 | 0.00E+00 | 1.46E-09 | 2.78E-08 |
| 6h  | 5.65E-09 | 2.35E-07 | 1.35E-07 | 7.61E-08 |
| 12h | 0.00E+00 | 0.00E+00 | 2.21E-09 | 1.43E-08 |
| 24h | 1.41E-09 | 6.84E-08 | 1.26E-08 | 2.11E-09 |
| 36h | 2.02E-07 | 8.82E-08 | 4.13E-08 | 3.00E-08 |
| 48h | 1.18E-05 | 2.59E-08 | 2.20E-08 | 2.18E-08 |
| 72h | 1.65E-06 | 3.29E-08 | 3.08E-08 | 1.13E-08 |
|     | cgd6_920 |          |          |          |
| 2h  | 6.59E-07 | 1.86E-05 | 2.01E-06 | 0.00E+00 |
| 6h  | 1.08E-04 | 3.57E-04 | 2.09E-03 | 2.25E-03 |
| 12h | 5.60E-04 | 1.02E-04 | 1.47E-04 | 4.64E-04 |
| 24h | 6.04E-05 | 2.96E-04 | 1.85E-04 | 1.16E-03 |
| 36h | 9.62E-05 | 1.77E-04 | 7.28E-04 | 1.07E-03 |
| 48h | 9.37E-05 | 8.11E-05 | 3.17E-04 | 3.21E-04 |
| 72h | 5.65E-05 | 1.43E-05 | 8.38E-05 | 2.90E-04 |
|     | cgd6_930 |          |          |          |
| 2h  | 0.00E+00 | 1.22E-04 | 1.49E-05 | 3.59E-04 |
| 6h  | 0.00E+00 | 1.25E-04 | 2.81E-06 | 2.75E-05 |
| 12h | 4.89E-08 | 3.05E-05 | 1.09E-05 | 5.06E-05 |
| 24h | 8.74E-10 | 5.66E-05 | 1.19E-05 | 1.36E-04 |
| 36h | 1.47E-07 | 2.40E-05 | 1.77E-05 | 5.92E-05 |
| 48h | 3.97E-05 | 1.71E-05 | 1.51E-05 | 1.16E-04 |
| 72h | 1.15E-04 | 2.67E-06 | 1.44E-05 | 1.41E-04 |
|     | cgd6_940 |          |          |          |
| 2h  | 6.47E-08 | 1.56E-04 | 2.83E-05 | 9.21E-06 |
| 6h  | 1.67E-07 | 2.31E-05 | 4.16E-06 | 5.07E-06 |
| 12h | 7.44E-06 | 7.07E-04 | 1.05E-05 | 3.00E-05 |
| 24h | 1.05E-06 | 7.68E-05 | 4.72E-06 | 5.94E-05 |
| 36h | 2.01E-06 | 8.21E-05 | 8.48E-06 | 2.31E-05 |
| 48h | 7.96E-07 | 1.55E-04 | 4.04E-06 | 1.41E-05 |
| 72h | 5.00E-07 | 1.39E-05 | 3.60E-06 | 3.70E-06 |
|     | cgd6_950 |          |          |          |
| 2h  | 1.89E-07 | 0.00E+00 | 0.00E+00 | 0.00E+00 |
| 6h  | 2.77E-07 | 0.00E+00 | 0.00E+00 | 0.00E+00 |
| 12h | 4.92E-08 | 1.17E-04 | 2.29E-05 | 7.19E-05 |
| 24h | 3.41E-08 | 6.33E-06 | 1.60E-06 | 1.88E-05 |
| 36h | 4.07E-07 | 4.09E-05 | 3.24E-05 | 1.29E-05 |
| 48h | 1.74E-05 | 1.30E-05 | 5.98E-06 | 1.26E-05 |
| 72h | 7.44E-07 | 6.25E-07 | 1.69E-06 | 9.25E-07 |
|     | cgd6_960 |          |          |          |
| 2h  | 2.96E-05 | 5.32E-05 | 5.45E-05 | 3.27E-05 |
| 6h  | 2.62E-07 | 1.56E-04 | 5.79E-05 | 2.52E-05 |
| 12h | 5.79E-07 | 1.19E-03 | 1.01E-04 | 1.00E-04 |
| 24h | 7.30E-07 | 2.88E-04 | 3.43E-05 | 8.51E-05 |
| 36h | 3.96E-07 | 2.68E-04 | 1.00E-04 | 3.36E-05 |
| 48h | 9.00E-07 | 1.85E-04 | 5.12E-05 | 2.53E-05 |
| 72h | 3.48E-07 | 1.80E-04 | 3.00E-06 | 9.70E-06 |
|     | cgd6_970 |          |          |          |

|     |           |          |          |          |
|-----|-----------|----------|----------|----------|
| 2h  | 0.00E+00  | 0.00E+00 | 0.00E+00 | 0.00E+00 |
| 6h  | 3.81E-08  | 2.31E-07 | 1.57E-08 | 1.19E-09 |
| 12h | 4.69E-08  | 1.14E-08 | 5.48E-09 | 4.25E-09 |
| 24h | 1.63E-07  | 1.00E-07 | 2.52E-08 | 8.61E-09 |
| 36h | 3.55E-07  | 1.60E-07 | 6.10E-08 | 7.59E-08 |
| 48h | 1.83E-06  | 3.63E-07 | 1.45E-07 | 6.78E-08 |
| 72h | 4.99E-07  | 1.72E-07 | 5.48E-08 | 1.03E-07 |
|     | cgd6_980  |          |          |          |
| 2h  | 0.00E+00  | 0.00E+00 | 0.00E+00 | 0.00E+00 |
| 6h  | 0.00E+00  | 5.50E-06 | 5.68E-07 | 1.41E-07 |
| 12h | 1.42E-09  | 1.37E-05 | 1.24E-07 | 1.05E-08 |
| 24h | 1.63E-09  | 8.90E-06 | 6.01E-07 | 5.55E-07 |
| 36h | 4.47E-08  | 1.38E-05 | 1.37E-06 | 1.96E-06 |
| 48h | 8.57E-06  | 4.43E-06 | 1.04E-06 | 9.59E-07 |
| 72h | 3.90E-06  | 1.28E-05 | 2.05E-07 | 1.67E-07 |
|     | cgd6_990  |          |          |          |
| 2h  | 9.05E-05  | 5.26E-03 | 5.73E-06 | 1.43E-04 |
| 6h  | 1.89E-04  | 3.72E-03 | 1.65E-04 | 2.28E-04 |
| 12h | 2.35E-05  | 2.34E-06 | 5.21E-05 | 4.13E-05 |
| 24h | 1.01E-04  | 1.45E-05 | 2.08E-04 | 2.34E-04 |
| 36h | 1.53E-04  | 1.79E-05 | 1.38E-04 | 1.04E-04 |
| 48h | 1.79E-04  | 2.33E-05 | 3.81E-04 | 2.05E-04 |
| 72h | 2.98E-05  | 1.49E-06 | 5.01E-07 | 3.52E-05 |
|     | cgd6_1010 |          |          |          |
| 2h  | 2.14E-08  | 0.00E+00 | 0.00E+00 | 2.85E-07 |
| 6h  | 1.68E-06  | 1.64E-06 | 4.29E-06 | 3.84E-07 |
| 12h | 6.23E-07  | 3.45E-07 | 6.92E-07 | 6.65E-07 |
| 24h | 1.12E-06  | 5.58E-07 | 5.13E-06 | 9.30E-06 |
| 36h | 7.49E-07  | 4.83E-07 | 1.89E-06 | 3.60E-06 |
| 48h | 5.93E-06  | 9.22E-07 | 1.13E-05 | 1.61E-05 |
| 72h | 7.12E-06  | 0.00E+00 | 1.02E-05 | 1.86E-05 |
|     | cgd6_1020 |          |          |          |
| 2h  | 1.65E-06  | 6.31E-07 | 1.04E-06 | 1.63E-06 |
| 6h  | 1.60E-06  | 3.24E-06 | 6.99E-06 | 1.11E-06 |
| 12h | 2.94E-07  | 2.97E-07 | 4.61E-06 | 1.06E-06 |
| 24h | 1.35E-06  | 5.34E-07 | 8.02E-06 | 2.25E-06 |
| 36h | 7.76E-07  | 4.12E-07 | 2.44E-06 | 4.12E-07 |
| 48h | 6.58E-07  | 1.92E-07 | 2.34E-06 | 5.69E-07 |
| 72h | 2.28E-07  | 0.00E+00 | 3.87E-07 | 3.21E-07 |
|     | cgd6_1030 |          |          |          |
| 2h  | 0.00E+00  | 0.00E+00 | 0.00E+00 | 0.00E+00 |
| 6h  | 0.00E+00  | 0.00E+00 | 0.00E+00 | 0.00E+00 |
| 12h | 4.48E-05  | 1.43E-05 | 8.30E-05 | 4.69E-04 |
| 24h | 1.68E-05  | 3.36E-06 | 2.21E-05 | 2.18E-04 |
| 36h | 4.18E-05  | 6.06E-06 | 9.56E-05 | 3.01E-04 |
| 48h | 2.72E-05  | 2.13E-06 | 1.67E-05 | 6.69E-05 |
| 72h | 7.63E-06  | 0.00E+00 | 3.17E-06 | 7.84E-05 |
|     | cgd6_1060 |          |          |          |
| 2h  | 0.00E+00  | 0.00E+00 | 0.00E+00 | 0.00E+00 |
| 6h  | 2.79E-07  | 3.25E-07 | 1.76E-06 | 4.84E-07 |
| 12h | 1.41E-07  | 1.13E-07 | 3.29E-07 | 1.36E-07 |
| 24h | 2.02E-07  | 1.42E-07 | 2.93E-06 | 1.92E-06 |
| 36h | 8.57E-07  | 5.30E-07 | 3.42E-06 | 5.98E-07 |



|     |           |          |          |          |
|-----|-----------|----------|----------|----------|
| 48h | 1.45E-06  | 3.57E-07 | 2.08E-06 | 1.44E-06 |
| 72h | 2.37E-06  | 5.31E-07 | 2.87E-06 | 5.12E-06 |
|     | cgd6_1070 |          |          |          |
| 2h  | 8.25E-09  | 0.00E+00 | 3.69E-08 | 0.00E+00 |
| 6h  | 2.62E-05  | 2.60E-05 | 1.24E-04 | 1.85E-05 |
| 12h | 9.46E-07  | 5.75E-07 | 7.09E-06 | 1.35E-05 |
| 24h | 2.90E-06  | 1.61E-06 | 1.08E-04 | 9.70E-05 |
| 36h | 8.15E-06  | 5.78E-06 | 5.68E-05 | 2.39E-05 |
| 48h | 4.40E-06  | 1.45E-06 | 2.18E-05 | 4.27E-05 |
| 72h | 6.58E-06  | 1.71E-06 | 1.90E-05 | 1.96E-05 |
|     | cgd6_1080 |          |          |          |
| 2h  | 4.17E-08  | 1.53E-09 | 1.55E-07 | 3.70E-08 |
| 6h  | 1.28E-06  | 3.00E-06 | 3.28E-06 | 2.67E-07 |
| 12h | 3.53E-03  | 6.92E-03 | 4.99E-03 | 1.76E-03 |
| 24h | 9.32E-04  | 5.53E-04 | 2.72E-03 | 9.96E-04 |
| 36h | 1.32E-03  | 3.45E-04 | 2.43E-03 | 5.50E-04 |
| 48h | 7.74E-04  | 5.56E-04 | 4.36E-03 | 7.90E-04 |
| 72h | 1.21E-03  | 1.65E-04 | 8.96E-04 | 2.03E-04 |
|     | cgd6_1090 |          |          |          |
| 2h  | 0.00E+00  | 0.00E+00 | 0.00E+00 | 0.00E+00 |
| 6h  | 0.00E+00  | 0.00E+00 | 0.00E+00 | 0.00E+00 |
| 12h | 1.14E-05  | 6.81E-06 | 2.59E-05 | 1.43E-05 |
| 24h | 2.22E-06  | 9.34E-07 | 8.79E-06 | 2.48E-06 |
| 36h | 4.30E-06  | 2.70E-06 | 3.33E-05 | 8.98E-06 |
| 48h | 1.25E-06  | 4.50E-07 | 5.33E-06 | 1.90E-06 |
| 72h | 5.27E-07  | 5.11E-07 | 6.42E-07 | 1.51E-06 |
|     | cgd6_1100 |          |          |          |
| 2h  | 0.00E+00  | 0.00E+00 | 0.00E+00 | 0.00E+00 |
| 6h  | 0.00E+00  | 0.00E+00 | 4.81E-08 | 0.00E+00 |
| 12h | 3.74E-07  | 2.21E-07 | 9.72E-07 | 9.25E-07 |
| 24h | 1.62E-07  | 8.88E-08 | 1.44E-05 | 5.18E-06 |
| 36h | 2.68E-06  | 1.15E-06 | 5.47E-06 | 1.24E-06 |
| 48h | 2.93E-06  | 1.62E-06 | 6.83E-06 | 7.41E-06 |
| 72h | 3.21E-07  | 1.09E-07 | 1.15E-07 | 3.54E-07 |
|     | cgd6_1110 |          |          |          |
| 2h  | 7.24E-07  | 0.00E+00 | 0.00E+00 | 6.84E-06 |
| 6h  | 3.98E-06  | 4.32E-06 | 2.61E-05 | 2.86E-05 |
| 12h | 5.52E-05  | 1.56E-04 | 1.37E-04 | 3.17E-04 |
| 24h | 1.46E-05  | 5.23E-06 | 9.69E-05 | 3.25E-04 |
| 36h | 3.52E-05  | 9.96E-06 | 1.18E-04 | 5.09E-04 |
| 48h | 2.40E-05  | 7.40E-06 | 5.97E-05 | 1.91E-04 |
| 72h | 3.94E-06  | 8.68E-07 | 1.18E-06 | 7.39E-05 |
|     | cgd6_1120 |          |          |          |
| 2h  | 2.11E-05  | 4.67E-06 | 6.62E-06 | 8.54E-05 |
| 6h  | 1.44E-05  | 1.25E-05 | 6.46E-05 | 1.95E-05 |
| 12h | 2.48E-06  | 6.48E-07 | 1.63E-05 | 5.23E-05 |
| 24h | 4.59E-06  | 3.98E-06 | 3.71E-05 | 6.44E-05 |
| 36h | 3.74E-06  | 1.98E-06 | 7.77E-06 | 1.37E-05 |
| 48h | 5.61E-06  | 1.18E-06 | 1.02E-05 | 2.24E-05 |
| 72h | 7.81E-07  | 1.91E-07 | 5.48E-07 | 1.35E-05 |
|     | cgd6_1130 |          |          |          |
| 2h  | 6.52E-07  | 0.00E+00 | 0.00E+00 | 0.00E+00 |
| 6h  | 2.64E-04  | 7.07E-05 | 1.22E-03 | 2.33E-04 |

|           |          |          |          |          |
|-----------|----------|----------|----------|----------|
| 12h       | 5.40E-05 | 0.00E+00 | 1.65E-04 | 6.05E-05 |
| 24h       | 8.31E-05 | 2.22E-05 | 6.63E-03 | 1.07E-03 |
| 36h       | 5.65E-04 | 2.45E-04 | 4.07E-03 | 1.37E-04 |
| 48h       | 1.34E-04 | 2.13E-04 | 1.20E-03 | 1.87E-04 |
| 72h       | 2.04E-05 | 2.89E-05 | 4.96E-05 | 1.23E-05 |
| cgd5_2870 |          |          |          |          |
| 2h        | 0.00E+00 | 0.00E+00 | 0.00E+00 | 1.27E-06 |
| 6h        | 0.00E+00 | 1.70E-05 | 2.80E-07 | 2.63E-06 |
| 12h       | 1.67E-05 | 2.07E-05 | 2.26E-07 | 4.10E-06 |
| 24h       | 6.32E-06 | 4.43E-05 | 5.31E-07 | 5.46E-06 |
| 36h       | 5.90E-05 | 3.64E-05 | 2.34E-06 | 1.68E-06 |
| 48h       | 3.09E-04 | 1.92E-04 | 3.83E-05 | 1.87E-06 |
| 72h       | 7.75E-05 | 9.83E-06 | 1.09E-06 | 2.89E-07 |
| cgd5_2890 |          |          |          |          |
| 2h        | 1.71E-04 | 1.50E-04 | 5.36E-05 | 1.51E-06 |
| 6h        | 8.40E-05 | 1.23E-04 | 8.10E-05 | 0.00E+00 |
| 12h       | 2.80E-05 | 7.63E-04 | 4.11E-05 | 1.64E-06 |
| 24h       | 5.06E-04 | 1.25E-03 | 3.03E-05 | 2.96E-06 |
| 36h       | 1.94E-04 | 1.28E-04 | 4.26E-05 | 1.29E-05 |
| 48h       | 8.36E-05 | 1.90E-04 | 1.32E-05 | 2.29E-05 |
| 72h       | 3.08E-04 | 1.06E-04 | 8.51E-05 | 2.22E-05 |
| cgd5_2920 |          |          |          |          |
| 2h        | 2.35E-06 | 0.00E+00 | 3.20E-07 | 2.15E-09 |
| 6h        | 2.66E-06 | 0.00E+00 | 6.86E-07 | 2.02E-09 |
| 12h       | 0.00E+00 | 0.00E+00 | 7.43E-08 | 1.47E-07 |
| 24h       | 1.41E-06 | 4.26E-06 | 8.96E-07 | 1.91E-07 |
| 36h       | 1.26E-06 | 1.53E-06 | 1.27E-06 | 1.43E-06 |
| 48h       | 2.90E-06 | 9.38E-06 | 2.77E-06 | 2.03E-06 |
| 72h       | 7.35E-06 | 7.25E-06 | 6.43E-06 | 1.34E-06 |
| cgd5_2940 |          |          |          |          |
| 2h        | 0.00E+00 | 0.00E+00 | 6.07E-10 | 4.09E-03 |
| 6h        | 0.00E+00 | 0.00E+00 | 0.00E+00 | 4.59E-04 |
| 12h       | 5.14E-09 | 0.00E+00 | 4.93E-09 | 5.48E-04 |
| 24h       | 2.07E-08 | 1.39E-07 | 1.00E-09 | 1.38E-03 |
| 36h       | 1.67E-07 | 7.21E-08 | 1.02E-08 | 4.38E-04 |
| 48h       | 5.23E-08 | 2.86E-07 | 2.51E-08 | 2.16E-04 |
| 72h       | 7.92E-08 | 6.53E-07 | 3.76E-08 | 9.45E-05 |
| cgd5_2950 |          |          |          |          |
| 2h        | 2.99E-05 | 4.26E-05 | 5.73E-05 | 1.92E-06 |
| 6h        | 1.21E-05 | 2.59E-05 | 1.17E-05 | 6.39E-07 |
| 12h       | 1.10E-05 | 3.29E-03 | 3.65E-05 | 1.03E-06 |
| 24h       | 1.42E-04 | 3.24E-04 | 8.73E-06 | 2.29E-06 |
| 36h       | 6.56E-05 | 5.28E-05 | 1.11E-05 | 1.61E-06 |
| 48h       | 2.36E-05 | 8.58E-05 | 9.29E-06 | 1.21E-06 |
| 72h       | 1.44E-05 | 4.43E-05 | 2.58E-06 | 3.00E-07 |
| cgd5_2960 |          |          |          |          |
| 2h        | 1.08E-05 | 4.11E-06 | 1.32E-05 | 2.28E-06 |
| 6h        | 4.21E-06 | 3.08E-06 | 1.03E-05 | 8.57E-07 |
| 12h       | 8.04E-07 | 1.28E-05 | 8.59E-06 | 3.16E-06 |
| 24h       | 1.10E-05 | 2.29E-05 | 4.25E-06 | 3.71E-06 |
| 36h       | 5.71E-06 | 4.52E-06 | 4.00E-06 | 7.05E-07 |
| 48h       | 2.75E-06 | 5.71E-06 | 2.30E-06 | 7.07E-07 |
| 72h       | 2.11E-06 | 8.74E-07 | 1.86E-05 | 1.14E-07 |

|     |           |          |          |          |
|-----|-----------|----------|----------|----------|
|     | cgd5_2970 |          |          |          |
| 2h  | 2.98E-06  | 8.30E-07 | 5.41E-06 | 1.28E-04 |
| 6h  | 2.95E-06  | 2.43E-06 | 8.51E-06 | 6.20E-05 |
| 12h | 2.64E-06  | 6.14E-06 | 2.56E-06 | 1.57E-03 |
| 24h | 4.95E-06  | 7.09E-06 | 2.75E-06 | 6.95E-04 |
| 36h | 3.87E-06  | 9.61E-07 | 1.45E-06 | 2.75E-04 |
| 48h | 2.46E-06  | 1.95E-06 | 2.42E-06 | 5.66E-04 |
| 72h | 8.52E-07  | 1.11E-06 | 2.74E-07 | 2.35E-04 |
|     | cgd5_2980 |          |          |          |
| 2h  | 4.98E-05  | 2.40E-05 | 3.61E-05 | 2.00E-03 |
| 6h  | 5.36E-05  | 3.35E-05 | 6.62E-05 | 1.07E-03 |
| 12h | 5.42E-06  | 5.85E-05 | 1.77E-05 | 1.15E-02 |
| 24h | 5.63E-05  | 2.00E-04 | 3.20E-05 | 5.99E-03 |
| 36h | 3.86E-05  | 2.85E-05 | 3.91E-06 | 1.00E-03 |
| 48h | 3.10E-05  | 2.96E-05 | 5.39E-06 | 8.40E-04 |
| 72h | 6.28E-06  | 1.37E-05 | 7.13E-07 | 4.16E-04 |
|     | cgd5_3010 |          |          |          |
| 2h  | 2.08E-05  | 0.00E+00 | 1.05E-04 | 2.53E-06 |
| 6h  | 7.57E-04  | 7.22E-05 | 1.05E-04 | 1.06E-07 |
| 12h | 1.02E-04  | 1.12E-05 | 5.04E-06 | 2.19E-05 |
| 24h | 4.06E-04  | 5.30E-05 | 4.16E-05 | 8.88E-06 |
| 36h | 9.95E-05  | 3.70E-05 | 2.47E-05 | 1.20E-05 |
| 48h | 4.19E-05  | 8.47E-06 | 2.11E-05 | 5.96E-06 |
| 72h | 5.64E-05  | 5.85E-05 | 1.58E-05 | 3.47E-06 |
|     | cgd5_3020 |          |          |          |
| 2h  | 5.11E-06  | 0.00E+00 | 1.42E-07 | 0.00E+00 |
| 6h  | 8.70E-07  | 1.57E-05 | 7.40E-08 | 0.00E+00 |
| 12h | 0.00E+00  | 1.56E-05 | 9.31E-08 | 4.40E-03 |
| 24h | 7.88E-07  | 1.63E-05 | 8.98E-07 | 7.86E-04 |
| 36h | 9.16E-06  | 2.46E-05 | 8.22E-07 | 6.44E-04 |
| 48h | 1.65E-06  | 2.51E-05 | 6.14E-07 | 5.93E-04 |
| 72h | 5.16E-06  | 7.61E-06 | 6.54E-05 | 3.54E-04 |
|     | cgd5_3080 |          |          |          |
| 2h  | 0.00E+00  | 3.38E-07 | 4.40E-08 | 2.57E-08 |
| 6h  | 2.52E-08  | 1.19E-07 | 7.36E-08 | 9.43E-07 |
| 12h | 0.00E+00  | 2.43E-07 | 5.22E-09 | 1.10E-06 |
| 24h | 5.94E-08  | 1.15E-07 | 9.02E-08 | 7.48E-07 |
| 36h | 2.37E-07  | 9.12E-06 | 2.39E-07 | 3.07E-06 |
| 48h | 5.03E-06  | 5.31E-06 | 1.28E-06 | 1.22E-06 |
| 72h | 2.48E-06  | 1.39E-06 | 2.41E-06 | 4.00E-06 |
|     | cgd6_1140 |          |          |          |
| 2h  | 1.13E-05  | 0.00E+00 | 0.00E+00 | 0.00E+00 |
| 6h  | 2.99E-05  | 5.67E-03 | 1.16E-03 | 1.39E-03 |
| 12h | 9.72E-04  | 1.29E-01 | 1.92E-02 | 5.30E-03 |
| 24h | 6.62E-04  | 1.03E-02 | 8.63E-03 | 2.24E-03 |
| 36h | 2.84E-04  | 6.82E-03 | 1.18E-02 | 4.00E-03 |
| 48h | 2.07E-04  | 1.56E-02 | 1.01E-02 | 1.72E-04 |
| 72h | 1.14E-04  | 4.82E-03 | 1.60E-03 | 1.43E-03 |
|     | cgd6_1160 |          |          |          |
| 2h  | 1.96E-07  | 0.00E+00 | 1.03E-08 | 4.92E-08 |
| 6h  | 3.07E-05  | 1.29E-04 | 2.33E-04 | 3.90E-05 |
| 12h | 9.35E-07  | 8.66E-06 | 2.00E-06 | 1.44E-06 |
| 24h | 1.15E-05  | 3.67E-05 | 6.13E-05 | 1.03E-05 |

|     |           |          |          |          |
|-----|-----------|----------|----------|----------|
| 36h | 3.00E-06  | 4.66E-06 | 6.35E-06 | 7.78E-06 |
| 48h | 5.72E-06  | 3.75E-06 | 3.13E-06 | 3.55E-06 |
| 72h | 1.73E-06  | 1.56E-06 | 9.04E-07 | 8.36E-07 |
|     | cgd6_1170 |          |          |          |
| 2h  | 0.00E+00  | 0.00E+00 | 9.78E-07 | 4.05E-06 |
| 6h  | 0.00E+00  | 0.00E+00 | 3.56E-07 | 1.20E-06 |
| 12h | 3.79E-04  | 4.02E-03 | 2.70E-04 | 2.05E-03 |
| 24h | 3.41E-04  | 1.03E-03 | 2.31E-04 | 5.10E-04 |
| 36h | 1.78E-04  | 1.69E-03 | 2.39E-04 | 4.13E-04 |
| 48h | 9.74E-05  | 3.56E-04 | 1.16E-04 | 4.46E-04 |
| 72h | 1.01E-04  | 1.20E-05 | 2.23E-05 | 6.83E-05 |
|     | cgd6_1180 |          |          |          |
| 2h  | 0.00E+00  | 0.00E+00 | 1.16E-04 | 0.00E+00 |
| 6h  | 0.00E+00  | 0.00E+00 | 0.00E+00 | 0.00E+00 |
| 12h | 2.29E-05  | 9.80E-05 | 7.89E-06 | 8.39E-06 |
| 24h | 2.96E-05  | 8.29E-06 | 1.61E-06 | 6.58E-06 |
| 36h | 2.49E-05  | 6.07E-05 | 3.93E-05 | 7.65E-06 |
| 48h | 9.24E-06  | 8.90E-06 | 1.91E-05 | 6.43E-06 |
| 72h | 3.37E-06  | 2.12E-06 | 1.98E-06 | 8.58E-07 |
|     | cgd6_1200 |          |          |          |
| 2h  | 2.24E-05  | 4.51E-06 | 2.91E-06 | 1.48E-06 |
| 6h  | 2.30E-05  | 4.15E-06 | 6.44E-06 | 4.52E-06 |
| 12h | 1.22E-06  | 1.05E-05 | 2.16E-06 | 1.38E-06 |
| 24h | 2.05E-05  | 8.37E-06 | 2.17E-06 | 3.82E-06 |
| 36h | 4.64E-06  | 9.70E-06 | 1.44E-06 | 2.41E-06 |
| 48h | 1.92E-06  | 1.83E-06 | 2.38E-07 | 6.19E-07 |
| 72h | 1.73E-06  | 1.67E-06 | 1.34E-06 | 4.30E-07 |
|     | cgd6_1230 |          |          |          |
| 2h  | 2.10E-06  | 3.39E-06 | 2.11E-06 | 9.95E-07 |
| 6h  | 2.09E-07  | 3.06E-07 | 8.98E-07 | 1.94E-07 |
| 12h | 7.66E-07  | 1.38E-05 | 1.38E-06 | 9.53E-07 |
| 24h | 2.40E-06  | 1.47E-06 | 3.12E-07 | 8.34E-07 |
| 36h | 8.66E-07  | 3.62E-06 | 2.44E-06 | 5.79E-07 |
| 48h | 3.71E-07  | 1.51E-06 | 2.04E-07 | 3.93E-07 |
| 72h | 5.02E-07  | 1.34E-06 | 1.02E-06 | 2.43E-07 |
|     | cgd6_1270 |          |          |          |
| 2h  | 1.68E-07  | 0.00E+00 | 2.89E-08 | 0.00E+00 |
| 6h  | 4.57E-06  | 9.17E-06 | 3.86E-06 | 2.00E-06 |
| 12h | 9.14E-07  | 9.91E-07 | 1.42E-06 | 2.38E-07 |
| 24h | 3.66E-06  | 9.06E-06 | 2.25E-06 | 6.78E-07 |
| 36h | 5.38E-06  | 1.39E-05 | 8.18E-06 | 1.26E-06 |
| 48h | 5.84E-06  | 6.77E-06 | 1.13E-06 | 2.70E-06 |
| 72h | 8.25E-07  | 8.15E-07 | 5.37E-07 | 3.61E-07 |
|     | cgd6_1280 |          |          |          |
| 2h  | 3.32E-09  | 2.81E-08 | 1.37E-09 | 0.00E+00 |
| 6h  | 1.80E-08  | 2.52E-07 | 4.58E-08 | 2.33E-08 |
| 12h | 3.59E-09  | 1.15E-07 | 3.12E-08 | 1.12E-08 |
| 24h | 4.61E-08  | 6.32E-07 | 1.26E-07 | 6.00E-08 |
| 36h | 1.30E-07  | 6.53E-07 | 2.44E-07 | 1.08E-07 |
| 48h | 1.25E-07  | 5.72E-07 | 2.58E-07 | 8.39E-08 |
| 72h | 5.06E-08  | 1.04E-07 | 2.40E-07 | 6.05E-08 |
|     | cgd6_1300 |          |          |          |
| 2h  | 1.97E-06  | 5.04E-07 | 1.12E-07 | 1.18E-07 |

|           |          |          |          |          |
|-----------|----------|----------|----------|----------|
| 6h        | 1.49E-06 | 3.10E-06 | 1.02E-06 | 2.17E-06 |
| 12h       | 3.65E-09 | 3.76E-06 | 1.90E-07 | 1.03E-07 |
| 24h       | 4.22E-07 | 1.87E-06 | 3.78E-07 | 7.14E-07 |
| 36h       | 7.10E-07 | 1.61E-06 | 7.91E-07 | 6.15E-07 |
| 48h       | 6.70E-07 | 1.86E-06 | 1.10E-06 | 4.67E-07 |
| 72h       | 1.62E-06 | 4.20E-06 | 1.83E-06 | 2.24E-06 |
| cgd6_1310 |          |          |          |          |
| 2h        | 0.00E+00 | 0.00E+00 | 0.00E+00 | 0.00E+00 |
| 6h        | 0.00E+00 | 0.00E+00 | 0.00E+00 | 0.00E+00 |
| 12h       | 4.73E-07 | 1.25E-06 | 1.17E-06 | 5.29E-07 |
| 24h       | 6.96E-07 | 5.61E-07 | 1.70E-07 | 1.82E-07 |
| 36h       | 2.08E-06 | 2.19E-06 | 1.41E-06 | 6.43E-07 |
| 48h       | 1.63E-06 | 2.27E-06 | 1.51E-06 | 3.34E-07 |
| 72h       | 3.73E-06 | 1.14E-06 | 1.11E-05 | 9.10E-07 |
| cgd6_1320 |          |          |          |          |
| 2h        | 2.89E-07 | 1.55E-08 | 6.10E-08 | 1.86E-07 |
| 6h        | 8.47E-08 | 6.31E-07 | 3.45E-07 | 7.15E-08 |
| 12h       | 1.29E-06 | 4.70E-07 | 1.61E-07 | 4.29E-08 |
| 24h       | 7.35E-07 | 1.25E-06 | 1.02E-06 | 2.20E-07 |
| 36h       | 8.35E-07 | 1.79E-06 | 7.67E-07 | 5.24E-07 |
| 48h       | 1.08E-06 | 1.33E-06 | 1.45E-06 | 4.19E-07 |
| 72h       | 5.72E-07 | 2.27E-07 | 2.21E-07 | 2.07E-07 |
| cgd6_1330 |          |          |          |          |
| 2h        | 7.16E-07 | 1.06E-07 | 4.16E-07 | 4.28E-08 |
| 6h        | 7.11E-07 | 2.00E-06 | 4.69E-07 | 4.08E-07 |
| 12h       | 1.63E-07 | 1.40E-06 | 4.49E-07 | 3.18E-07 |
| 24h       | 1.43E-06 | 9.68E-07 | 6.22E-07 | 4.97E-07 |
| 36h       | 1.39E-06 | 1.06E-06 | 7.50E-07 | 5.86E-07 |
| 48h       | 2.17E-06 | 4.97E-06 | 9.89E-06 | 1.97E-06 |
| 72h       | 1.00E-06 | 3.99E-07 | 6.64E-07 | 2.23E-07 |
| cgd6_1340 |          |          |          |          |
| 2h        | 8.30E-08 | 0.00E+00 | 8.64E-09 | 7.84E-08 |
| 6h        | 4.32E-08 | 1.35E-06 | 2.83E-07 | 1.69E-07 |
| 12h       | 7.67E-09 | 6.38E-08 | 1.15E-08 | 0.00E+00 |
| 24h       | 6.52E-08 | 1.91E-07 | 2.28E-07 | 4.47E-08 |
| 36h       | 3.03E-08 | 7.37E-08 | 1.39E-07 | 9.57E-08 |
| 48h       | 5.39E-07 | 1.38E-06 | 1.07E-06 | 2.35E-07 |
| 72h       | 1.10E-06 | 1.40E-06 | 1.74E-06 | 5.03E-07 |
| cgd6_1350 |          |          |          |          |
| 2h        | 3.26E-06 | 3.22E-06 | 3.90E-07 | 1.70E-06 |
| 6h        | 2.67E-06 | 2.42E-05 | 4.61E-06 | 2.67E-06 |
| 12h       | 8.90E-08 | 1.00E-05 | 1.15E-06 | 1.04E-07 |
| 24h       | 1.95E-06 | 1.17E-05 | 4.58E-06 | 3.36E-06 |
| 36h       | 8.28E-07 | 3.58E-06 | 1.95E-06 | 1.12E-06 |
| 48h       | 1.28E-06 | 6.54E-06 | 3.45E-06 | 1.79E-06 |
| 72h       | 3.68E-07 | 4.53E-07 | 5.14E-07 | 7.08E-07 |
| cgd6_1370 |          |          |          |          |
| 2h        | 5.04E-04 | 0.00E+00 | 0.00E+00 | 1.64E-04 |
| 6h        | 1.51E-03 | 2.65E-03 | 1.20E-03 | 1.45E-03 |
| 12h       | 1.54E-03 | 1.47E-03 | 6.74E-05 | 3.04E-04 |
| 24h       | 3.73E-04 | 4.94E-04 | 2.37E-03 | 1.17E-04 |
| 36h       | 6.65E-04 | 1.83E-03 | 3.69E-03 | 3.24E-04 |
| 48h       | 4.02E-04 | 1.23E-03 | 2.81E-03 | 2.92E-04 |

|     |           |          |          |          |
|-----|-----------|----------|----------|----------|
| 72h | 1.05E-03  | 8.72E-04 | 8.91E-04 | 3.35E-04 |
|     | cgd6_1380 |          |          |          |
| 2h  | 2.90E-06  | 1.87E-06 | 8.65E-07 | 1.40E-06 |
| 6h  | 3.53E-06  | 3.29E-05 | 4.77E-06 | 7.96E-06 |
| 12h | 2.11E-06  | 1.48E-05 | 1.89E-06 | 2.39E-06 |
| 24h | 6.68E-07  | 1.04E-05 | 9.55E-06 | 2.67E-06 |
| 36h | 3.28E-06  | 1.72E-05 | 7.76E-06 | 2.97E-06 |
| 48h | 5.34E-07  | 2.65E-06 | 3.39E-06 | 1.46E-06 |
| 72h | 1.01E-06  | 2.93E-06 | 4.48E-07 | 3.92E-07 |
|     | cgd6_1390 |          |          |          |
| 2h  | 1.36E-06  | 2.78E-06 | 1.91E-06 | 3.88E-06 |
| 6h  | 3.85E-06  | 3.48E-05 | 8.05E-06 | 1.96E-05 |
| 12h | 1.08E-06  | 2.19E-05 | 3.87E-06 | 3.46E-06 |
| 24h | 8.18E-07  | 6.41E-06 | 4.86E-06 | 4.87E-06 |
| 36h | 1.25E-06  | 8.50E-06 | 2.24E-06 | 5.92E-06 |
| 48h | 2.46E-07  | 1.94E-06 | 1.33E-06 | 1.39E-06 |
| 72h | 3.98E-07  | 5.30E-06 | 5.34E-07 | 1.35E-06 |
|     | cgd6_1400 |          |          |          |
| 2h  | 2.91E-06  | 2.46E-06 | 2.82E-07 | 8.42E-07 |
| 6h  | 8.60E-07  | 5.56E-06 | 1.61E-06 | 1.44E-06 |
| 12h | 7.18E-08  | 7.32E-06 | 3.96E-07 | 4.15E-08 |
| 24h | 9.90E-08  | 6.80E-07 | 7.76E-07 | 3.18E-07 |
| 36h | 3.58E-07  | 1.10E-06 | 6.91E-07 | 3.79E-07 |
| 48h | 1.37E-07  | 4.71E-07 | 2.29E-07 | 1.64E-07 |
| 72h | 8.01E-08  | 2.93E-07 | 1.34E-07 | 1.13E-07 |
|     | cgd6_1410 |          |          |          |
| 2h  | 1.76E-04  | 1.84E-04 | 5.55E-05 | 2.83E-04 |
| 6h  | 1.34E-04  | 1.61E-03 | 1.63E-04 | 3.58E-04 |
| 12h | 1.11E-05  | 6.33E-04 | 2.31E-05 | 1.54E-05 |
| 24h | 3.37E-05  | 2.14E-04 | 9.27E-05 | 9.20E-05 |
| 36h | 2.06E-05  | 1.11E-04 | 2.99E-05 | 7.84E-05 |
| 48h | 3.16E-05  | 5.67E-05 | 2.65E-05 | 2.76E-05 |
| 72h | 3.92E-06  | 5.12E-06 | 3.98E-06 | 9.20E-06 |
|     | cgd6_1420 |          |          |          |
| 2h  | 8.70E-06  | 4.69E-08 | 1.01E-06 | 3.11E-06 |
| 6h  | 1.39E-06  | 1.70E-05 | 3.20E-06 | 5.39E-06 |
| 12h | 3.68E-07  | 1.27E-05 | 1.48E-06 | 5.41E-07 |
| 24h | 1.03E-06  | 3.40E-06 | 3.00E-06 | 2.73E-06 |
| 36h | 1.51E-06  | 3.13E-06 | 1.70E-06 | 2.75E-06 |
| 48h | 2.05E-06  | 4.05E-06 | 3.45E-06 | 1.56E-06 |
| 72h | 4.32E-07  | 7.85E-07 | 5.00E-07 | 6.85E-07 |
|     | cgd6_1430 |          |          |          |
| 2h  | 2.87E-04  | 8.45E-05 | 3.78E-05 | 9.18E-05 |
| 6h  | 3.87E-05  | 1.36E-04 | 5.05E-05 | 7.32E-05 |
| 12h | 2.74E-04  | 1.11E-03 | 1.06E-04 | 2.39E-04 |
| 24h | 9.46E-05  | 1.28E-04 | 1.20E-04 | 1.30E-04 |
| 36h | 3.80E-05  | 1.48E-04 | 8.65E-05 | 7.05E-05 |
| 48h | 4.10E-05  | 1.16E-04 | 5.78E-05 | 2.35E-05 |
| 72h | 8.30E-06  | 1.16E-05 | 6.40E-06 | 1.17E-05 |
|     | cgd6_1440 |          |          |          |
| 2h  | 2.33E-03  | 8.44E-04 | 2.47E-04 | 5.73E-03 |
| 6h  | 6.00E-04  | 7.65E-03 | 2.90E-04 | 2.02E-03 |
| 12h | 1.28E-03  | 1.11E-02 | 3.61E-04 | 5.17E-03 |

|     |           |          |          |          |
|-----|-----------|----------|----------|----------|
| 24h | 7.27E-04  | 1.80E-03 | 2.09E-04 | 9.79E-04 |
| 36h | 2.79E-04  | 1.41E-03 | 2.38E-04 | 6.27E-04 |
| 48h | 4.14E-04  | 2.55E-03 | 3.43E-04 | 3.03E-04 |
| 72h | 1.21E-04  | 1.04E-03 | 4.05E-05 | 3.56E-04 |
|     | cgd6_1450 |          |          |          |
| 2h  | 7.88E-06  | 4.21E-06 | 5.30E-07 | 1.06E-06 |
| 6h  | 2.84E-07  | 3.29E-07 | 3.24E-07 | 6.61E-07 |
| 12h | 1.05E-06  | 7.83E-06 | 4.15E-07 | 8.90E-07 |
| 24h | 1.15E-06  | 1.56E-06 | 9.87E-07 | 2.11E-06 |
| 36h | 3.24E-07  | 2.91E-06 | 5.21E-07 | 7.65E-07 |
| 48h | 2.19E-06  | 7.26E-06 | 1.70E-06 | 6.64E-07 |
| 72h | 1.94E-06  | 3.99E-06 | 1.42E-06 | 2.11E-06 |
|     | cgd6_1460 |          |          |          |
| 2h  | 4.95E-06  | 5.37E-06 | 8.96E-07 | 3.15E-06 |
| 6h  | 2.60E-06  | 7.64E-06 | 1.34E-06 | 2.07E-06 |
| 12h | 8.58E-07  | 2.49E-05 | 6.89E-07 | 4.40E-07 |
| 24h | 2.26E-06  | 8.13E-06 | 1.79E-06 | 1.11E-06 |
| 36h | 7.81E-07  | 3.04E-06 | 9.60E-07 | 1.13E-06 |
| 48h | 1.76E-06  | 3.74E-06 | 9.23E-07 | 4.25E-07 |
| 72h | 2.83E-07  | 3.87E-06 | 5.97E-08 | 4.61E-07 |
|     | cgd6_1470 |          |          |          |
| 2h  | 0.00E+00  | 9.89E-07 | 1.75E-06 | 6.09E-06 |
| 6h  | 2.91E-06  | 7.03E-06 | 4.40E-06 | 3.73E-06 |
| 12h | 2.24E-07  | 1.23E-06 | 7.68E-07 | 4.34E-07 |
| 24h | 3.22E-06  | 1.59E-05 | 2.10E-06 | 1.50E-06 |
| 36h | 7.49E-07  | 2.44E-06 | 8.88E-07 | 1.68E-06 |
| 48h | 8.10E-07  | 1.97E-06 | 7.93E-07 | 4.82E-07 |
| 72h | 1.30E-07  | 1.18E-07 | 1.50E-07 | 1.88E-07 |
|     | cgd6_1480 |          |          |          |
| 2h  | 8.56E-03  | 0.00E+00 | 2.83E-04 | 2.68E-04 |
| 6h  | 6.84E-03  | 2.49E-02 | 4.99E-04 | 2.05E-03 |
| 12h | 2.44E-03  | 1.29E-02 | 2.25E-04 | 0.00E+00 |
| 24h | 1.96E-03  | 2.37E-02 | 1.53E-04 | 3.24E-04 |
| 36h | 8.29E-04  | 1.08E-02 | 2.01E-04 | 4.66E-04 |
| 48h | 8.57E-04  | 2.82E-03 | 7.20E-05 | 2.14E-04 |
| 72h | 1.31E-03  | 1.08E-03 | 8.56E-05 | 9.45E-05 |
|     | cgd6_1490 |          |          |          |
| 2h  | 2.00E-06  | 1.65E-06 | 2.69E-06 | 9.85E-07 |
| 6h  | 4.87E-06  | 2.37E-05 | 9.23E-06 | 2.43E-06 |
| 12h | 1.06E-06  | 1.54E-05 | 2.39E-06 | 2.07E-06 |
| 24h | 4.83E-06  | 1.76E-05 | 4.66E-06 | 2.69E-06 |
| 36h | 3.98E-06  | 9.66E-06 | 3.57E-06 | 2.24E-06 |
| 48h | 1.07E-06  | 5.86E-06 | 1.76E-06 | 9.24E-07 |
| 72h | 3.65E-07  | 8.89E-07 | 5.78E-07 | 2.97E-07 |
|     | cgd6_1500 |          |          |          |
| 2h  | 0.00E+00  | 0.00E+00 | 0.00E+00 | 0.00E+00 |
| 6h  | 0.00E+00  | 0.00E+00 | 0.00E+00 | 0.00E+00 |
| 12h | 1.90E-05  | 2.47E-05 | 9.66E-06 | 3.04E-05 |
| 24h | 4.34E-06  | 7.46E-06 | 3.34E-06 | 4.83E-06 |
| 36h | 1.02E-05  | 2.45E-05 | 1.40E-05 | 5.52E-06 |
| 48h | 6.81E-07  | 2.31E-06 | 1.28E-06 | 7.54E-07 |
| 72h | 2.72E-07  | 2.55E-07 | 1.68E-07 | 3.58E-07 |
|     | cgd6_1510 |          |          |          |

|     |           |          |          |          |
|-----|-----------|----------|----------|----------|
| 2h  | 1.18E-07  | 1.07E-07 | 1.75E-08 | 1.49E-08 |
| 6h  | 0.00E+00  | 0.00E+00 | 5.89E-08 | 6.33E-09 |
| 12h | 1.45E-05  | 2.41E-05 | 1.78E-05 | 3.42E-05 |
| 24h | 1.86E-06  | 2.79E-06 | 1.62E-06 | 2.94E-06 |
| 36h | 2.40E-06  | 2.25E-05 | 1.13E-05 | 1.89E-06 |
| 48h | 1.35E-07  | 8.43E-07 | 5.13E-07 | 4.21E-07 |
| 72h | 1.28E-07  | 1.91E-08 | 1.50E-08 | 1.22E-07 |
|     | cgd6_1520 |          |          |          |
| 2h  | 1.23E-04  | 1.85E-04 | 4.46E-03 | 1.32E-03 |
| 6h  | 2.53E-04  | 6.96E-04 | 2.67E-03 | 4.19E-03 |
| 12h | 1.22E-04  | 5.63E-04 | 6.43E-04 | 2.25E-03 |
| 24h | 1.15E-04  | 7.80E-04 | 4.38E-05 | 1.78E-03 |
| 36h | 1.69E-04  | 8.39E-04 | 1.13E-03 | 1.44E-03 |
| 48h | 8.51E-05  | 1.34E-04 | 3.97E-04 | 1.02E-04 |
| 72h | 2.26E-05  | 1.28E-05 | 1.38E-05 | 2.62E-04 |
|     | cgd6_1530 |          |          |          |
| 2h  | 2.71E-03  | 4.03E-03 | 2.85E-04 | 1.09E-03 |
| 6h  | 7.85E-03  | 2.24E-02 | 8.45E-04 | 1.85E-03 |
| 12h | 6.87E-04  | 1.19E-02 | 2.34E-04 | 5.87E-04 |
| 24h | 1.61E-03  | 4.50E-02 | 2.74E-04 | 6.00E-04 |
| 36h | 2.89E-03  | 1.13E-02 | 2.08E-04 | 5.30E-04 |
| 48h | 1.85E-03  | 9.38E-03 | 1.29E-04 | 9.55E-05 |
| 72h | 3.30E-04  | 3.36E-04 | 4.73E-05 | 8.16E-05 |
|     | cgd6_1550 |          |          |          |
| 2h  | 1.57E-06  | 2.18E-07 | 5.17E-06 | 7.33E-06 |
| 6h  | 5.70E-06  | 1.41E-05 | 3.82E-05 | 2.15E-05 |
| 12h | 3.88E-07  | 7.37E-06 | 3.69E-06 | 9.58E-07 |
| 24h | 1.77E-06  | 1.83E-05 | 1.76E-05 | 1.34E-05 |
| 36h | 3.24E-06  | 4.28E-06 | 1.72E-05 | 1.19E-05 |
| 48h | 1.32E-06  | 4.24E-06 | 2.18E-05 | 1.20E-05 |
| 72h | 3.90E-07  | 3.56E-07 | 7.28E-06 | 1.73E-06 |
|     | cgd6_1560 |          |          |          |
| 2h  | 1.21E-06  | 0.00E+00 | 1.12E-06 | 7.22E-07 |
| 6h  | 3.10E-06  | 8.29E-06 | 9.72E-07 | 6.02E-07 |
| 12h | 2.15E-07  | 1.88E-06 | 2.17E-07 | 2.42E-07 |
| 24h | 9.09E-07  | 6.71E-06 | 5.54E-07 | 4.02E-07 |
| 36h | 9.84E-07  | 2.17E-06 | 5.97E-07 | 5.68E-07 |
| 48h | 4.28E-07  | 1.07E-06 | 4.37E-07 | 4.45E-07 |
| 72h | 8.74E-08  | 3.54E-07 | 1.36E-07 | 5.94E-08 |
|     | cgd6_1570 |          |          |          |
| 2h  | 3.63E-08  | 0.00E+00 | 0.00E+00 | 0.00E+00 |
| 6h  | 3.41E-07  | 7.29E-07 | 2.53E-08 | 1.78E-08 |
| 12h | 2.46E-07  | 2.21E-07 | 1.25E-07 | 1.07E-07 |
| 24h | 3.18E-07  | 4.68E-06 | 4.33E-07 | 2.00E-07 |
| 36h | 6.12E-07  | 1.68E-06 | 6.48E-07 | 5.06E-07 |
| 48h | 2.28E-06  | 4.71E-06 | 1.08E-06 | 6.90E-07 |
| 72h | 4.41E-07  | 6.10E-07 | 4.33E-07 | 2.68E-07 |
|     | cgd6_1580 |          |          |          |
| 2h  | 7.30E-09  | 5.45E-08 | 1.67E-08 | 7.79E-09 |
| 6h  | 1.12E-07  | 7.81E-07 | 1.74E-07 | 7.24E-09 |
| 12h | 2.28E-07  | 2.03E-06 | 6.34E-07 | 1.12E-06 |
| 24h | 4.99E-07  | 3.69E-06 | 2.99E-07 | 6.38E-07 |
| 36h | 1.08E-06  | 3.58E-06 | 2.75E-06 | 9.76E-07 |



|     |           |          |          |          |
|-----|-----------|----------|----------|----------|
| 48h | 1.02E-06  | 3.97E-06 | 1.52E-06 | 9.14E-07 |
| 72h | 4.14E-07  | 8.08E-07 | 5.06E-07 | 3.68E-07 |
|     | cgd6_1590 |          |          |          |
| 2h  | 1.12E-04  | 1.71E-04 | 1.50E-04 | 1.09E-04 |
| 6h  | 6.08E-05  | 2.40E-04 | 7.48E-05 | 3.41E-05 |
| 12h | 1.19E-05  | 2.94E-04 | 4.69E-05 | 6.07E-06 |
| 24h | 2.60E-05  | 2.26E-04 | 7.04E-05 | 4.84E-05 |
| 36h | 3.85E-05  | 1.14E-04 | 3.01E-03 | 5.07E-05 |
| 48h | 9.36E-06  | 3.40E-05 | 3.63E-05 | 8.59E-06 |
| 72h | 3.31E-06  | 2.70E-06 | 7.84E-06 | 2.16E-06 |
|     | cgd6_1750 |          |          |          |
| 2h  | 1.45E-07  | 2.39E-07 | 3.13E-07 | 6.95E-07 |
| 6h  | 1.75E-06  | 7.82E-06 | 2.28E-06 | 2.21E-06 |
| 12h | 1.52E-07  | 1.90E-06 | 2.84E-07 | 8.77E-07 |
| 24h | 5.48E-07  | 8.04E-06 | 1.59E-06 | 8.35E-07 |
| 36h | 1.13E-06  | 2.61E-06 | 6.43E-07 | 1.57E-06 |
| 48h | 8.99E-07  | 3.00E-06 | 3.86E-07 | 3.36E-07 |
| 72h | 2.18E-07  | 2.55E-07 | 1.26E-07 | 1.03E-07 |
|     | cgd6_1760 |          |          |          |
| 2h  | 2.00E-06  | 0.00E+00 | 5.72E-05 | 1.21E-04 |
| 6h  | 1.60E-05  | 3.94E-05 | 3.54E-04 | 7.47E-04 |
| 12h | 6.65E-07  | 7.90E-06 | 1.34E-04 | 8.30E-06 |
| 24h | 5.16E-06  | 5.75E-05 | 1.62E-03 | 3.08E-04 |
| 36h | 1.80E-05  | 4.74E-05 | 1.35E-04 | 1.60E-04 |
| 48h | 1.02E-05  | 2.91E-03 | 2.51E-04 | 7.81E-05 |
| 72h | 3.19E-06  | 9.78E-06 | 7.10E-05 | 1.78E-05 |
|     | cgd6_1770 |          |          |          |
| 2h  | 7.51E-07  | 2.53E-06 | 1.41E-05 | 1.46E-05 |
| 6h  | 4.84E-06  | 1.23E-05 | 2.38E-05 | 3.50E-05 |
| 12h | 9.89E-08  | 1.66E-06 | 2.33E-06 | 9.13E-07 |
| 24h | 1.70E-06  | 9.33E-06 | 2.48E-05 | 8.85E-06 |
| 36h | 3.76E-06  | 7.81E-06 | 6.70E-06 | 2.14E-06 |
| 48h | 7.61E-07  | 3.91E-06 | 3.08E-06 | 2.57E-06 |
| 72h | 1.86E-07  | 3.07E-07 | 1.13E-06 | 5.89E-07 |
|     | cgd6_1780 |          |          |          |
| 2h  | 5.80E-07  | 7.67E-07 | 1.47E-06 | 3.33E-06 |
| 6h  | 1.29E-06  | 1.73E-06 | 4.52E-06 | 2.69E-06 |
| 12h | 2.23E-07  | 1.73E-06 | 3.71E-07 | 1.40E-07 |
| 24h | 3.59E-07  | 2.57E-06 | 2.64E-06 | 5.34E-07 |
| 36h | 7.55E-07  | 1.43E-06 | 8.72E-07 | 1.18E-06 |
| 48h | 2.26E-07  | 8.90E-07 | 6.33E-07 | 2.15E-07 |
| 72h | 1.64E-07  | 1.17E-07 | 4.53E-08 | 2.55E-07 |
|     | cgd6_1790 |          |          |          |
| 2h  | 1.49E-06  | 2.39E-06 | 3.73E-06 | 3.25E-06 |
| 6h  | 6.76E-07  | 3.35E-06 | 1.96E-05 | 4.42E-06 |
| 12h | 1.98E-07  | 6.20E-06 | 1.77E-06 | 4.94E-07 |
| 24h | 8.80E-07  | 1.33E-05 | 1.44E-05 | 2.37E-06 |
| 36h | 1.59E-06  | 7.03E-06 | 3.72E-06 | 2.72E-06 |
| 48h | 2.79E-07  | 4.66E-07 | 1.71E-06 | 4.53E-07 |
| 72h | 4.38E-07  | 7.76E-07 | 4.92E-07 | 4.10E-07 |
|     | cgd6_1810 |          |          |          |
| 2h  | 7.08E-08  | 2.14E-08 | 1.68E-07 | 7.00E-08 |
| 6h  | 4.56E-07  | 1.24E-06 | 4.38E-07 | 4.92E-07 |

|     |           |          |          |          |
|-----|-----------|----------|----------|----------|
| 12h | 1.30E-07  | 1.42E-07 | 9.45E-08 | 6.36E-08 |
| 24h | 1.48E-07  | 1.59E-06 | 6.05E-07 | 9.85E-08 |
| 36h | 8.14E-07  | 1.91E-06 | 4.97E-07 | 2.94E-07 |
| 48h | 2.96E-07  | 4.17E-07 | 1.06E-06 | 2.03E-07 |
| 72h | 3.84E-07  | 2.18E-07 | 7.34E-08 | 8.80E-08 |
|     | cgd6_1820 |          |          |          |
| 2h  | 1.65E-05  | 2.14E-05 | 1.38E-04 | 5.06E-05 |
| 6h  | 4.70E-06  | 1.37E-05 | 3.39E-05 | 1.91E-05 |
| 12h | 8.29E-06  | 4.41E-05 | 5.12E-05 | 2.68E-05 |
| 24h | 7.13E-06  | 2.24E-05 | 6.05E-05 | 4.05E-05 |
| 36h | 5.15E-06  | 1.72E-05 | 2.17E-05 | 1.05E-05 |
| 48h | 3.47E-06  | 9.09E-06 | 1.72E-05 | 4.91E-06 |
| 72h | 3.74E-06  | 4.82E-06 | 1.35E-05 | 2.94E-06 |
|     | cgd6_1830 |          |          |          |
| 2h  | 3.69E-04  | 1.71E-03 | 5.87E-05 | 1.38E-03 |
| 6h  | 2.77E-04  | 7.25E-04 | 1.20E-04 | 3.07E-04 |
| 12h | 2.61E-04  | 8.88E-03 | 5.62E-05 | 1.18E-04 |
| 24h | 5.71E-04  | 2.52E-03 | 1.71E-05 | 2.26E-04 |
| 36h | 2.50E-04  | 2.53E-03 | 2.04E-05 | 2.11E-04 |
| 48h | 3.86E-04  | 3.44E-03 | 9.01E-06 | 4.55E-05 |
| 72h | 2.14E-04  | 5.30E-04 | 1.53E-05 | 2.66E-04 |
|     | cgd6_1840 |          |          |          |
| 2h  | 4.64E-05  | 2.48E-05 | 1.29E-05 | 8.82E-04 |
| 6h  | 3.34E-04  | 9.53E-04 | 5.17E-04 | 3.21E-04 |
| 12h | 4.62E-06  | 3.73E-04 | 1.04E-05 | 1.74E-04 |
| 24h | 1.86E-04  | 1.52E-03 | 1.29E-04 | 2.60E-05 |
| 36h | 1.62E-04  | 8.62E-04 | 2.51E-05 | 1.21E-04 |
| 48h | 3.24E-04  | 2.12E-03 | 2.09E-05 | 1.40E-04 |
| 72h | 1.02E-04  | 1.75E-04 | 9.54E-05 | 1.31E-04 |
|     | cgd6_1860 |          |          |          |
| 2h  | 3.06E-07  | 1.42E-07 | 1.86E-06 | 1.08E-07 |
| 6h  | 2.92E-07  | 2.13E-06 | 7.99E-07 | 1.41E-06 |
| 12h | 2.17E-09  | 0.00E+00 | 6.81E-07 | 0.00E+00 |
| 24h | 1.58E-07  | 1.96E-07 | 1.30E-06 | 7.15E-07 |
| 36h | 3.51E-07  | 8.92E-07 | 2.83E-06 | 6.51E-07 |
| 48h | 5.80E-07  | 2.66E-06 | 6.03E-06 | 1.13E-06 |
| 72h | 1.80E-07  | 1.49E-07 | 3.58E-06 | 1.29E-06 |
|     | cgd6_1870 |          |          |          |
| 2h  | 5.05E-06  | 4.98E-05 | 1.27E-03 | 2.40E-04 |
| 6h  | 1.39E-04  | 5.17E-04 | 1.65E-03 | 6.41E-04 |
| 12h | 2.10E-06  | 5.63E-05 | 1.31E-04 | 9.31E-06 |
| 24h | 1.75E-05  | 3.79E-04 | 4.06E-04 | 1.05E-04 |
| 36h | 3.09E-05  | 1.02E-04 | 1.29E-03 | 1.59E-04 |
| 48h | 1.90E-05  | 7.88E-05 | 2.19E-04 | 4.81E-05 |
| 72h | 4.05E-06  | 2.33E-06 | 7.22E-05 | 1.45E-05 |
|     | cgd6_1900 |          |          |          |
| 2h  | 5.51E-07  | 2.10E-06 | 9.47E-07 | 1.19E-08 |
| 6h  | 4.69E-07  | 1.24E-06 | 3.46E-07 | 2.92E-07 |
| 12h | 9.24E-07  | 3.40E-06 | 2.71E-06 | 1.90E-07 |
| 24h | 3.03E-07  | 1.17E-06 | 7.98E-07 | 7.61E-07 |
| 36h | 1.83E-06  | 6.70E-06 | 2.98E-06 | 1.93E-06 |
| 48h | 4.61E-07  | 2.07E-06 | 1.87E-06 | 1.32E-06 |
| 72h | 1.15E-06  | 2.10E-06 | 1.19E-06 | 1.95E-06 |

|     |           |          |          |          |
|-----|-----------|----------|----------|----------|
|     | cgd6_1910 |          |          |          |
| 2h  | 3.66E-04  | 3.04E-04 | 1.27E-04 | 9.01E-05 |
| 6h  | 1.46E-04  | 1.06E-03 | 6.90E-03 | 7.97E-03 |
| 12h | 1.03E-05  | 1.83E-04 | 1.44E-03 | 8.89E-04 |
| 24h | 3.35E-05  | 2.70E-04 | 1.33E-03 | 4.80E-04 |
| 36h | 6.27E-05  | 6.06E-04 | 5.13E-04 | 3.46E-04 |
| 48h | 6.59E-05  | 3.09E-04 | 4.45E-04 | 1.42E-03 |
| 72h | 2.86E-06  | 7.16E-05 | 1.68E-04 | 6.18E-05 |
|     | cgd6_1930 |          |          |          |
| 2h  | 0.00E+00  | 0.00E+00 | 0.00E+00 | 0.00E+00 |
| 6h  | 0.00E+00  | 0.00E+00 | 0.00E+00 | 0.00E+00 |
| 12h | 8.24E-09  | 1.82E-08 | 5.83E-08 | 4.75E-08 |
| 24h | 2.41E-08  | 9.76E-09 | 6.50E-08 | 1.02E-08 |
| 36h | 6.25E-08  | 1.65E-07 | 5.91E-08 | 4.98E-08 |
| 48h | 4.63E-08  | 1.07E-07 | 3.10E-08 | 1.08E-07 |
| 72h | 1.47E-08  | 1.52E-07 | 8.52E-08 | 7.96E-08 |
|     | cgd6_1940 |          |          |          |
| 2h  | 0.00E+00  | 0.00E+00 | 0.00E+00 | 0.00E+00 |
| 6h  | 6.98E-07  | 7.09E-07 | 2.11E-06 | 4.07E-07 |
| 12h | 1.44E-07  | 1.99E-07 | 2.37E-07 | 8.44E-08 |
| 24h | 1.77E-07  | 3.89E-07 | 3.11E-06 | 7.06E-07 |
| 36h | 5.93E-07  | 4.16E-07 | 7.33E-07 | 3.92E-07 |
| 48h | 4.25E-07  | 8.89E-07 | 2.95E-07 | 1.00E-06 |
| 72h | 5.99E-08  | 3.74E-07 | 5.12E-07 | 1.93E-07 |
|     | cgd6_1950 |          |          |          |
| 2h  | 2.55E-08  | 6.81E-08 | 0.00E+00 | 9.97E-09 |
| 6h  | 3.46E-06  | 4.08E-06 | 1.19E-05 | 5.51E-06 |
| 12h | 5.69E-06  | 5.84E-06 | 3.35E-05 | 7.67E-06 |
| 24h | 1.82E-06  | 7.41E-06 | 8.73E-06 | 1.33E-05 |
| 36h | 7.82E-06  | 1.80E-05 | 3.89E-05 | 2.62E-05 |
| 48h | 5.49E-06  | 1.50E-05 | 5.81E-06 | 9.35E-06 |
| 72h | 8.78E-07  | 4.70E-06 | 8.51E-06 | 4.07E-06 |
|     | cgd6_1960 |          |          |          |
| 2h  | 0.00E+00  | 0.00E+00 | 0.00E+00 | 0.00E+00 |
| 6h  | 4.68E-09  | 2.79E-08 | 6.42E-08 | 4.03E-08 |
| 12h | 1.62E-06  | 1.44E-06 | 2.57E-06 | 4.38E-07 |
| 24h | 2.56E-07  | 5.19E-07 | 4.36E-07 | 1.97E-07 |
| 36h | 7.53E-07  | 5.41E-07 | 1.60E-06 | 1.02E-06 |
| 48h | 2.33E-07  | 3.94E-07 | 5.91E-07 | 2.86E-07 |
| 72h | 1.64E-07  | 2.53E-07 | 5.82E-07 | 3.11E-07 |
|     | cgd6_1970 |          |          |          |
| 2h  | 4.69E-07  | 3.23E-07 | 1.09E-07 | 3.95E-07 |
| 6h  | 3.22E-07  | 2.20E-07 | 4.05E-06 | 4.70E-07 |
| 12h | 9.95E-08  | 4.75E-08 | 5.31E-07 | 1.99E-07 |
| 24h | 9.49E-08  | 1.66E-07 | 9.57E-07 | 1.63E-07 |
| 36h | 3.23E-07  | 2.67E-07 | 3.40E-07 | 3.71E-07 |
| 48h | 1.62E-07  | 1.76E-07 | 3.48E-07 | 2.12E-07 |
| 72h | 3.52E-08  | 8.46E-08 | 9.70E-08 | 1.73E-08 |
|     | cgd6_1990 |          |          |          |
| 2h  | 9.16E-07  | 0.00E+00 | 0.00E+00 | 1.47E-06 |
| 6h  | 2.13E-07  | 6.82E-07 | 0.00E+00 | 5.29E-07 |
| 12h | 3.04E-08  | 4.50E-07 | 0.00E+00 | 0.00E+00 |
| 24h | 1.01E-07  | 3.15E-06 | 2.56E-07 | 5.06E-07 |

|     |           |          |          |          |
|-----|-----------|----------|----------|----------|
| 36h | 1.70E-06  | 1.60E-05 | 1.01E-05 | 1.31E-06 |
| 48h | 3.01E-06  | 9.40E-05 | 1.53E-05 | 2.35E-05 |
| 72h | 4.13E-07  | 2.16E-05 | 2.13E-06 | 8.86E-06 |
|     | cgd6_2000 |          |          |          |
| 2h  | 2.88E-07  | 0.00E+00 | 0.00E+00 | 8.79E-08 |
| 6h  | 1.93E-06  | 3.72E-05 | 1.61E-04 | 7.36E-05 |
| 12h | 1.28E-07  | 9.16E-07 | 8.06E-06 | 2.73E-06 |
| 24h | 7.22E-07  | 1.90E-05 | 1.14E-04 | 3.93E-05 |
| 36h | 1.22E-05  | 4.28E-05 | 4.23E-05 | 3.92E-05 |
| 48h | 2.91E-06  | 6.24E-05 | 2.63E-05 | 3.65E-05 |
| 72h | 3.33E-07  | 1.22E-05 | 4.30E-06 | 4.55E-06 |
|     | cgd6_2020 |          |          |          |
| 2h  | 5.35E-06  | 1.36E-04 | 9.60E-07 | 1.43E-05 |
| 6h  | 1.07E-05  | 1.45E-04 | 5.98E-04 | 8.10E-05 |
| 12h | 3.04E-06  | 2.73E-05 | 4.71E-05 | 2.08E-05 |
| 24h | 4.40E-06  | 1.08E-04 | 3.54E-04 | 1.52E-04 |
| 36h | 1.57E-05  | 9.00E-05 | 6.62E-05 | 1.05E-04 |
| 48h | 3.71E-05  | 8.20E-04 | 5.86E-04 | 7.24E-04 |
| 72h | 1.15E-05  | 3.22E-04 | 6.49E-04 | 1.87E-04 |
|     | cgd6_2030 |          |          |          |
| 2h  | 3.79E-06  | 5.76E-06 | 7.51E-07 | 2.92E-06 |
| 6h  | 1.02E-06  | 8.37E-06 | 2.71E-05 | 1.04E-05 |
| 12h | 5.56E-07  | 1.56E-06 | 1.59E-05 | 2.10E-06 |
| 24h | 2.05E-06  | 7.22E-06 | 1.75E-05 | 1.44E-05 |
| 36h | 1.01E-06  | 3.30E-06 | 3.07E-06 | 4.69E-06 |
| 48h | 5.13E-06  | 1.89E-05 | 1.64E-05 | 1.46E-05 |
| 72h | 6.28E-07  | 8.65E-06 | 5.53E-06 | 4.28E-06 |
|     | cgd6_2040 |          |          |          |
| 2h  | 4.28E-07  | 1.26E-06 | 3.94E-07 | 5.21E-07 |
| 6h  | 2.15E-06  | 5.68E-07 | 5.52E-06 | 1.69E-06 |
| 12h | 4.52E-08  | 2.28E-07 | 1.26E-06 | 4.97E-07 |
| 24h | 9.20E-07  | 1.52E-06 | 2.48E-06 | 2.93E-06 |
| 36h | 8.00E-07  | 2.00E-06 | 4.87E-07 | 1.44E-06 |
| 48h | 9.14E-07  | 8.62E-07 | 5.74E-07 | 1.37E-06 |
| 72h | 8.59E-08  | 3.79E-07 | 1.34E-07 | 2.53E-07 |
|     | cgd6_2060 |          |          |          |
| 2h  | 2.60E-05  | 9.80E-06 | 3.25E-06 | 1.04E-05 |
| 6h  | 1.55E-05  | 8.20E-06 | 4.58E-05 | 2.10E-05 |
| 12h | 5.27E-06  | 4.99E-06 | 1.99E-05 | 3.84E-05 |
| 24h | 2.37E-06  | 6.71E-06 | 1.10E-05 | 1.28E-05 |
| 36h | 1.56E-05  | 5.98E-06 | 6.96E-06 | 7.03E-06 |
| 48h | 4.78E-06  | 5.97E-06 | 1.69E-06 | 7.14E-06 |
| 72h | 8.27E-06  | 2.27E-06 | 8.23E-07 | 3.53E-06 |
|     | cgd6_120  |          |          |          |
| 2h  | 1.48E-07  | 1.96E-07 | 0.00E+00 | 1.89E-08 |
| 6h  | 2.38E-04  | 9.64E-04 | 2.60E-03 | 2.04E-03 |
| 12h | 4.88E-05  | 1.09E-04 | 5.52E-05 | 1.27E-03 |
| 24h | 1.22E-04  | 2.61E-04 | 1.24E-03 | 2.58E-04 |
| 36h | 2.36E-04  | 3.97E-04 | 2.17E-04 | 8.92E-04 |
| 48h | 1.20E-04  | 1.22E-04 | 4.14E-04 | 1.33E-04 |
| 72h | 2.80E-06  | 7.65E-06 | 3.07E-06 | 1.63E-05 |
|     | cgd6_130  |          |          |          |
| 2h  | 4.01E-06  | 1.74E-06 | 1.48E-07 | 1.27E-05 |

|     |          |          |          |          |
|-----|----------|----------|----------|----------|
| 6h  | 8.95E-07 | 2.27E-06 | 3.77E-06 | 6.77E-06 |
| 12h | 8.09E-07 | 8.26E-07 | 2.13E-06 | 1.02E-05 |
| 24h | 4.84E-06 | 4.61E-06 | 5.39E-06 | 2.07E-06 |
| 36h | 7.09E-07 | 8.34E-07 | 7.26E-07 | 1.40E-06 |
| 48h | 1.07E-06 | 6.17E-07 | 5.55E-07 | 1.19E-06 |
| 72h | 2.99E-07 | 4.79E-07 | 6.80E-07 | 1.16E-06 |
|     | cgd6_140 |          |          |          |
| 2h  | 1.18E-05 | 8.36E-06 | 1.15E-06 | 1.04E-05 |
| 6h  | 2.64E-06 | 8.67E-06 | 1.31E-05 | 5.44E-06 |
| 12h | 4.68E-06 | 2.79E-06 | 8.76E-06 | 6.65E-06 |
| 24h | 1.21E-05 | 1.84E-05 | 2.16E-05 | 9.32E-06 |
| 36h | 3.47E-06 | 5.08E-06 | 4.49E-06 | 3.57E-06 |
| 48h | 2.91E-06 | 1.53E-06 | 2.81E-06 | 2.16E-06 |
| 72h | 4.54E-07 | 3.65E-07 | 1.39E-06 | 1.06E-06 |
|     | cgd6_150 |          |          |          |
| 2h  | 2.02E-05 | 3.12E-04 | 4.03E-06 | 2.07E-04 |
| 6h  | 2.18E-05 | 1.01E-04 | 5.79E-05 | 2.62E-04 |
| 12h | 5.34E-06 | 1.69E-05 | 1.88E-05 | 1.10E-04 |
| 24h | 2.05E-05 | 3.23E-04 | 3.80E-05 | 7.63E-05 |
| 36h | 1.44E-05 | 5.64E-04 | 1.42E-05 | 5.67E-05 |
| 48h | 6.33E-06 | 1.38E-05 | 7.71E-06 | 2.71E-05 |
| 72h | 2.45E-06 | 8.44E-06 | 4.54E-06 | 1.60E-05 |
|     | cgd6_160 |          |          |          |
| 2h  | 8.04E-09 | 4.13E-08 | 2.12E-09 | 4.11E-08 |
| 6h  | 1.97E-09 | 9.09E-09 | 2.55E-09 | 1.08E-08 |
| 12h | 1.78E-07 | 2.31E-07 | 2.94E-07 | 1.17E-07 |
| 24h | 7.13E-08 | 1.10E-07 | 4.23E-08 | 3.09E-08 |
| 36h | 1.35E-07 | 3.46E-07 | 3.96E-07 | 2.90E-07 |
| 48h | 1.09E-07 | 6.81E-08 | 6.23E-08 | 5.42E-08 |
| 72h | 2.39E-08 | 9.33E-08 | 1.19E-07 | 7.79E-08 |
|     | cgd6_180 |          |          |          |
| 2h  | 2.03E-07 | 9.02E-09 | 1.92E-08 | 1.16E-06 |
| 6h  | 3.78E-07 | 1.72E-07 | 1.32E-06 | 2.39E-06 |
| 12h | 1.71E-07 | 2.20E-09 | 7.39E-08 | 2.55E-07 |
| 24h | 7.37E-08 | 2.37E-07 | 9.28E-07 | 9.51E-07 |
| 36h | 1.54E-07 | 5.05E-07 | 3.51E-07 | 3.65E-07 |
| 48h | 3.05E-07 | 1.20E-07 | 1.93E-07 | 5.11E-07 |
| 72h | 6.50E-08 | 1.62E-07 | 2.95E-07 | 5.03E-07 |
|     | cgd6_190 |          |          |          |
| 2h  | 0.00E+00 | 0.00E+00 | 0.00E+00 | 0.00E+00 |
| 6h  | 0.00E+00 | 0.00E+00 | 0.00E+00 | 0.00E+00 |
| 12h | 0.00E+00 | 0.00E+00 | 4.65E-09 | 2.23E-09 |
| 24h | 3.22E-09 | 3.87E-10 | 2.30E-09 | 1.93E-09 |
| 36h | 6.22E-08 | 2.17E-07 | 5.05E-08 | 1.30E-07 |
| 48h | 1.72E-06 | 1.06E-06 | 8.69E-07 | 5.73E-07 |
| 72h | 3.86E-07 | 1.22E-06 | 2.56E-06 | 2.92E-06 |
|     | cgd6_200 |          |          |          |
| 2h  | 0.00E+00 | 0.00E+00 | 0.00E+00 | 5.38E-06 |
| 6h  | 2.32E-06 | 0.00E+00 | 0.00E+00 | 0.00E+00 |
| 12h | 0.00E+00 | 0.00E+00 | 2.72E-05 | 1.63E-06 |
| 24h | 1.69E-05 | 1.96E-05 | 1.26E-04 | 5.00E-07 |
| 36h | 2.15E-04 | 1.15E-05 | 1.19E-04 | 0.00E+00 |
| 48h | 7.24E-03 | 7.55E-04 | 8.62E-03 | 6.28E-04 |

|     |          |          |          |          |
|-----|----------|----------|----------|----------|
| 72h | 1.45E-02 | 3.99E-03 | 2.71E-02 | 3.20E-03 |
|     | cgd6_210 |          |          |          |
| 2h  | 7.36E-08 | 4.19E-05 | 0.00E+00 | 2.62E-08 |
| 6h  | 1.37E-08 | 0.00E+00 | 2.68E-08 | 1.25E-07 |
| 12h | 1.57E-08 | 1.87E-08 | 6.34E-08 | 7.08E-08 |
| 24h | 3.09E-08 | 3.21E-08 | 3.88E-08 | 1.10E-08 |
| 36h | 2.33E-08 | 5.10E-08 | 3.10E-08 | 5.99E-08 |
| 48h | 2.92E-07 | 2.69E-07 | 2.97E-07 | 3.54E-07 |
| 72h | 4.37E-08 | 2.43E-07 | 1.48E-07 | 1.42E-07 |
|     | cgd6_230 |          |          |          |
| 2h  | 6.88E-07 | 6.32E-05 | 0.00E+00 | 2.79E-05 |
| 6h  | 7.81E-06 | 3.01E-05 | 1.00E-04 | 1.22E-04 |
| 12h | 9.95E-07 | 1.79E-06 | 4.63E-06 | 1.98E-05 |
| 24h | 3.56E-06 | 9.76E-05 | 1.03E-04 | 1.44E-04 |
| 36h | 1.17E-06 | 7.52E-05 | 1.41E-05 | 1.12E-04 |
| 48h | 5.79E-06 | 5.32E-05 | 1.70E-05 | 1.31E-04 |
| 72h | 3.57E-07 | 1.60E-05 | 4.54E-06 | 1.13E-04 |
|     | cgd6_240 |          |          |          |
| 2h  | 0.00E+00 | 0.00E+00 | 0.00E+00 | 4.29E-05 |
| 6h  | 6.76E-07 | 7.25E-06 | 6.36E-05 | 1.99E-04 |
| 12h | 6.98E-07 | 8.27E-05 | 2.36E-05 | 1.02E-04 |
| 24h | 1.09E-05 | 5.46E-05 | 9.82E-05 | 3.38E-04 |
| 36h | 1.46E-05 | 7.02E-04 | 6.96E-05 | 8.50E-05 |
| 48h | 1.41E-05 | 9.20E-05 | 4.18E-05 | 3.70E-05 |
| 72h | 1.74E-06 | 1.17E-04 | 9.23E-06 | 3.75E-04 |
|     | cgd6_400 |          |          |          |
| 2h  | 2.05E-05 | 5.81E-06 | 1.76E-06 | 0.00E+00 |
| 6h  | 4.38E-06 | 3.25E-06 | 1.55E-05 | 2.30E-05 |
| 12h | 1.07E-06 | 3.29E-06 | 4.13E-06 | 1.84E-05 |
| 24h | 2.01E-06 | 8.53E-06 | 1.98E-05 | 1.52E-05 |
| 36h | 1.19E-06 | 8.36E-06 | 5.01E-06 | 7.02E-06 |
| 48h | 3.63E-07 | 1.10E-06 | 3.22E-06 | 6.41E-06 |
| 72h | 1.85E-07 | 2.67E-06 | 8.47E-07 | 1.14E-06 |
|     | cgd6_410 |          |          |          |
| 2h  | 9.02E-06 | 4.27E-06 | 0.00E+00 | 2.37E-06 |
| 6h  | 7.07E-06 | 1.79E-05 | 6.25E-06 | 4.68E-06 |
| 12h | 2.64E-06 | 6.16E-06 | 1.30E-05 | 1.52E-05 |
| 24h | 5.63E-06 | 4.35E-06 | 1.90E-05 | 6.24E-06 |
| 36h | 2.17E-06 | 3.29E-06 | 2.10E-05 | 3.47E-06 |
| 48h | 1.98E-06 | 1.71E-06 | 1.33E-05 | 2.56E-06 |
| 72h | 6.44E-07 | 5.04E-07 | 9.50E-07 | 4.21E-07 |
|     | cgd6_480 |          |          |          |
| 2h  | 9.43E-10 | 0.00E+00 | 0.00E+00 | 4.62E-09 |
| 6h  | 4.05E-08 | 3.93E-07 | 3.00E-07 | 2.78E-07 |
| 12h | 5.33E-08 | 4.09E-07 | 2.48E-07 | 3.90E-08 |
| 24h | 1.46E-07 | 1.45E-07 | 2.01E-06 | 3.03E-07 |
| 36h | 2.18E-07 | 2.95E-07 | 8.53E-07 | 4.66E-07 |
| 48h | 2.49E-07 | 1.56E-07 | 1.19E-06 | 2.11E-07 |
| 72h | 1.06E-06 | 5.70E-07 | 8.22E-07 | 1.78E-07 |
|     | cgd6_490 |          |          |          |
| 2h  | 1.26E-06 | 2.67E-06 | 3.34E-07 | 6.79E-06 |
| 6h  | 4.28E-07 | 2.26E-06 | 4.33E-07 | 1.96E-06 |
| 12h | 4.53E-07 | 1.01E-06 | 4.91E-06 | 2.10E-06 |

|     |          |          |          |          |
|-----|----------|----------|----------|----------|
| 24h | 2.53E-06 | 1.53E-06 | 1.97E-06 | 2.56E-06 |
| 36h | 7.36E-07 | 1.01E-06 | 2.98E-06 | 5.09E-07 |
| 48h | 6.68E-07 | 4.01E-07 | 7.99E-07 | 6.23E-07 |
| 72h | 3.74E-07 | 4.45E-07 | 3.15E-07 | 2.15E-07 |
|     | cgd6_500 |          |          |          |
| 2h  | 0.00E+00 | 0.00E+00 | 0.00E+00 | 0.00E+00 |
| 6h  | 0.00E+00 | 4.74E-09 | 0.00E+00 | 0.00E+00 |
| 12h | 5.97E-08 | 7.50E-08 | 2.10E-07 | 1.43E-07 |
| 24h | 4.91E-08 | 2.95E-08 | 6.34E-08 | 2.40E-08 |
| 36h | 1.23E-07 | 1.92E-07 | 5.94E-07 | 2.13E-07 |
| 48h | 1.33E-07 | 5.29E-08 | 1.51E-07 | 1.60E-07 |
| 72h | 5.98E-08 | 2.55E-07 | 2.28E-07 | 8.73E-08 |
|     | cgd6_520 |          |          |          |
| 2h  | 1.01E-06 | 1.58E-06 | 4.19E-07 | 1.87E-06 |
| 6h  | 9.13E-07 | 3.71E-07 | 4.68E-07 | 3.28E-07 |
| 12h | 6.72E-06 | 3.35E-05 | 4.18E-05 | 1.08E-05 |
| 24h | 4.11E-06 | 1.37E-06 | 2.70E-06 | 7.33E-07 |
| 36h | 1.40E-06 | 2.78E-06 | 8.55E-06 | 4.14E-06 |
| 48h | 4.52E-07 | 2.54E-07 | 1.13E-06 | 4.47E-07 |
| 72h | 3.42E-07 | 9.10E-07 | 4.29E-07 | 3.60E-07 |
|     | cgd6_530 |          |          |          |
| 2h  | 1.55E-06 | 6.42E-06 | 2.46E-07 | 9.31E-06 |
| 6h  | 1.48E-06 | 4.34E-06 | 8.91E-07 | 2.40E-06 |
| 12h | 1.66E-07 | 2.18E-06 | 2.01E-06 | 5.18E-07 |
| 24h | 7.43E-07 | 3.53E-07 | 1.64E-06 | 6.73E-07 |
| 36h | 6.47E-07 | 2.32E-06 | 1.57E-06 | 1.50E-06 |
| 48h | 6.80E-07 | 7.42E-07 | 1.07E-06 | 7.16E-07 |
| 72h | 9.19E-07 | 1.28E-06 | 9.44E-07 | 2.11E-06 |
|     | cgd6_540 |          |          |          |
| 2h  | 3.73E-04 | 1.20E-04 | 6.61E-05 | 9.19E-05 |
| 6h  | 3.84E-04 | 1.84E-04 | 6.39E-04 | 1.18E-04 |
| 12h | 7.32E-06 | 9.11E-06 | 9.72E-05 | 3.17E-05 |
| 24h | 1.83E-04 | 1.35E-05 | 5.66E-04 | 2.77E-05 |
| 36h | 1.57E-04 | 3.51E-05 | 1.62E-04 | 2.56E-05 |
| 48h | 4.40E-04 | 3.89E-05 | 2.37E-04 | 4.89E-05 |
| 72h | 3.62E-04 | 3.17E-05 | 6.53E-05 | 2.06E-05 |
|     | cgd6_560 |          |          |          |
| 2h  | 8.88E-08 | 7.01E-08 | 2.80E-08 | 9.10E-08 |
| 6h  | 1.07E-07 | 8.23E-07 | 2.40E-08 | 4.55E-07 |
| 12h | 1.33E-08 | 5.97E-09 | 3.21E-08 | 1.72E-08 |
| 24h | 3.73E-08 | 1.82E-08 | 9.93E-08 | 4.03E-08 |
| 36h | 6.76E-08 | 1.27E-07 | 2.90E-07 | 9.26E-08 |
| 48h | 1.06E-07 | 1.49E-07 | 1.06E-07 | 5.11E-08 |
| 72h | 6.78E-08 | 4.06E-08 | 1.89E-07 | 3.07E-08 |
|     | cgd6_570 |          |          |          |
| 2h  | 2.54E-04 | 3.24E-03 | 6.83E-05 | 5.28E-04 |
| 6h  | 1.05E-03 | 4.01E-04 | 5.15E-04 | 7.03E-04 |
| 12h | 1.01E-04 | 7.00E-05 | 2.45E-04 | 1.83E-04 |
| 24h | 2.17E-04 | 8.25E-05 | 4.55E-04 | 1.15E-04 |
| 36h | 3.57E-04 | 7.28E-05 | 2.44E-04 | 1.48E-04 |
| 48h | 2.68E-04 | 2.63E-05 | 1.41E-04 | 3.06E-05 |
| 72h | 4.39E-05 | 1.59E-05 | 4.41E-05 | 8.82E-06 |
|     | cgd6_580 |          |          |          |

|     |           |          |          |          |
|-----|-----------|----------|----------|----------|
| 2h  | 7.98E-05  | 1.74E-04 | 3.65E-05 | 2.67E-04 |
| 6h  | 8.20E-05  | 1.47E-04 | 2.35E-04 | 7.07E-04 |
| 12h | 2.67E-06  | 6.45E-06 | 3.63E-04 | 2.39E-05 |
| 24h | 4.33E-05  | 1.63E-05 | 5.44E-04 | 4.75E-05 |
| 36h | 9.02E-05  | 1.91E-05 | 3.16E-04 | 9.51E-05 |
| 48h | 1.51E-04  | 2.12E-05 | 2.13E-04 | 5.69E-05 |
| 72h | 1.23E-04  | 1.18E-05 | 1.83E-04 | 1.73E-05 |
|     | cgd6_610  |          |          |          |
| 2h  | 4.77E-04  | 4.34E-04 | 4.94E-05 | 1.30E-02 |
| 6h  | 3.58E-04  | 1.96E-04 | 1.27E-04 | 1.74E-03 |
| 12h | 1.37E-04  | 3.13E-04 | 2.99E-04 | 4.21E-05 |
| 24h | 1.99E-04  | 1.84E-05 | 7.88E-05 | 6.27E-05 |
| 36h | 1.41E-04  | 3.14E-05 | 1.47E-04 | 3.02E-05 |
| 48h | 1.24E-03  | 2.93E-05 | 1.14E-04 | 9.24E-04 |
| 72h | 2.62E-04  | 1.85E-05 | 2.88E-04 | 7.73E-06 |
|     | cgd6_620  |          |          |          |
| 2h  | 9.43E-06  | 8.55E-06 | 6.46E-06 | 1.99E-05 |
| 6h  | 9.28E-07  | 2.97E-06 | 1.06E-06 | 2.37E-06 |
| 12h | 3.47E-06  | 2.45E-06 | 1.10E-05 | 5.20E-06 |
| 24h | 2.42E-06  | 3.14E-06 | 1.31E-05 | 2.61E-06 |
| 36h | 2.35E-06  | 1.61E-06 | 1.04E-05 | 5.26E-06 |
| 48h | 2.62E-06  | 9.27E-07 | 4.78E-06 | 7.46E-06 |
| 72h | 8.15E-07  | 3.62E-07 | 1.43E-06 | 3.61E-07 |
|     | cgd5_4490 |          |          |          |
| 2h  | 0.00E+00  | 0.00E+00 | 0.00E+00 | 0.00E+00 |
| 6h  | 3.84E-06  | 3.89E-06 | 2.42E-06 | 2.31E-06 |
| 12h | 9.23E-08  | 1.14E-07 | 6.88E-08 | 7.69E-08 |
| 24h | 6.92E-07  | 4.09E-06 | 2.51E-06 | 2.22E-07 |
| 36h | 9.68E-07  | 5.81E-07 | 9.19E-07 | 9.54E-07 |
| 48h | 2.24E-06  | 3.02E-06 | 2.04E-06 | 1.41E-06 |
| 72h | 2.40E-07  | 1.86E-07 | 4.25E-07 | 7.38E-07 |
|     | cgd6_10   |          |          |          |
| 2h  | 2.02E-04  | 1.49E-04 | 3.27E-04 | 1.47E-04 |
| 6h  | 1.30E-04  | 1.23E-04 | 1.09E-04 | 8.87E-05 |
| 12h | 2.04E-04  | 4.94E-05 | 1.01E-04 | 4.53E-05 |
| 24h | 2.48E-04  | 1.78E-04 | 1.54E-04 | 1.52E-04 |
| 36h | 4.34E-05  | 5.46E-05 | 1.06E-04 | 6.34E-05 |
| 48h | 6.79E-05  | 1.58E-04 | 1.10E-04 | 4.38E-05 |
| 72h | 2.71E-05  | 1.66E-05 | 1.17E-05 | 1.20E-05 |
|     | cgd6_20   |          |          |          |
| 2h  | 1.84E-05  | 1.56E-05 | 4.01E-05 | 8.58E-06 |
| 6h  | 4.70E-06  | 4.92E-06 | 2.98E-06 | 4.95E-06 |
| 12h | 1.33E-05  | 4.72E-06 | 6.90E-06 | 4.93E-06 |
| 24h | 2.97E-05  | 1.35E-05 | 1.86E-05 | 9.64E-06 |
| 36h | 6.67E-06  | 5.87E-06 | 6.68E-06 | 5.20E-06 |
| 48h | 4.41E-06  | 5.58E-06 | 8.79E-06 | 2.57E-06 |
| 72h | 2.27E-06  | 1.86E-06 | 1.96E-06 | 2.01E-06 |
|     | cgd6_30   |          |          |          |
| 2h  | 3.47E-07  | 1.60E-06 | 2.53E-06 | 9.23E-07 |
| 6h  | 4.61E-06  | 5.04E-06 | 2.25E-06 | 2.73E-06 |
| 12h | 1.36E-07  | 2.34E-07 | 7.63E-07 | 2.07E-07 |
| 24h | 8.84E-07  | 3.86E-06 | 1.01E-06 | 5.18E-07 |
| 36h | 1.12E-06  | 1.64E-06 | 2.73E-06 | 2.60E-06 |



|     |          |          |          |          |
|-----|----------|----------|----------|----------|
| 48h | 7.85E-07 | 7.94E-07 | 4.40E-07 | 1.05E-06 |
| 72h | 4.95E-07 | 8.22E-07 | 7.91E-07 | 6.84E-07 |
|     | cgd6_40  |          |          |          |
| 2h  | 1.15E-04 | 2.39E-04 | 3.00E-04 | 4.14E-04 |
| 6h  | 1.31E-04 | 7.15E-05 | 4.81E-05 | 1.19E-04 |
| 12h | 9.71E-05 | 7.00E-05 | 1.82E-04 | 1.35E-04 |
| 24h | 1.58E-04 | 1.19E-04 | 8.49E-05 | 1.97E-04 |
| 36h | 8.01E-05 | 9.02E-05 | 1.87E-04 | 1.61E-04 |
| 48h | 1.83E-05 | 2.79E-05 | 2.80E-05 | 3.61E-05 |
| 72h | 4.14E-05 | 2.18E-05 | 2.61E-05 | 2.12E-05 |
|     | cgd6_50  |          |          |          |
| 2h  | 1.68E-07 | 2.29E-08 | 3.02E-07 | 1.52E-07 |
| 6h  | 1.20E-06 | 1.27E-06 | 4.55E-07 | 3.37E-07 |
| 12h | 3.69E-07 | 6.48E-08 | 1.50E-07 | 1.32E-07 |
| 24h | 1.20E-07 | 5.74E-07 | 3.57E-07 | 1.27E-07 |
| 36h | 7.89E-07 | 1.04E-06 | 2.06E-06 | 8.99E-07 |
| 48h | 2.21E-07 | 5.53E-07 | 5.56E-07 | 4.83E-07 |
| 72h | 4.40E-07 | 2.22E-07 | 5.07E-07 | 4.46E-07 |
|     | cgd6_60  |          |          |          |
| 2h  | 8.67E-07 | 4.28E-07 | 1.50E-05 | 9.28E-07 |
| 6h  | 9.18E-07 | 1.07E-06 | 4.08E-07 | 5.16E-07 |
| 12h | 5.44E-05 | 1.41E-05 | 3.79E-05 | 1.13E-05 |
| 24h | 8.35E-06 | 1.63E-05 | 8.36E-06 | 3.74E-06 |
| 36h | 3.94E-05 | 1.51E-04 | 1.68E-04 | 2.50E-05 |
| 48h | 9.56E-06 | 3.86E-05 | 1.90E-05 | 2.38E-05 |
| 72h | 6.00E-06 | 3.52E-06 | 5.28E-06 | 4.20E-06 |
|     | cgd6_70  |          |          |          |
| 2h  | 1.74E-06 | 3.15E-07 | 5.35E-07 | 4.35E-07 |
| 6h  | 9.00E-06 | 1.75E-05 | 5.90E-06 | 1.89E-06 |
| 12h | 4.25E-07 | 2.86E-07 | 1.25E-06 | 4.22E-07 |
| 24h | 5.60E-07 | 1.05E-05 | 7.47E-06 | 7.11E-07 |
| 36h | 7.10E-06 | 8.67E-06 | 6.89E-06 | 7.55E-06 |
| 48h | 3.40E-06 | 8.99E-06 | 9.17E-06 | 2.51E-06 |
| 72h | 1.70E-06 | 5.83E-07 | 1.30E-06 | 4.75E-07 |
|     | cgd6_80  |          |          |          |
| 2h  | 6.10E-07 | 5.58E-07 | 4.55E-07 | 7.87E-07 |
| 6h  | 4.19E-07 | 5.50E-07 | 9.60E-07 | 6.23E-07 |
| 12h | 1.18E-07 | 3.97E-07 | 9.10E-07 | 2.02E-07 |
| 24h | 1.79E-07 | 1.12E-06 | 3.49E-07 | 4.57E-07 |
| 36h | 6.25E-07 | 8.25E-07 | 1.38E-06 | 3.29E-07 |
| 48h | 2.14E-07 | 4.50E-07 | 4.53E-07 | 3.96E-07 |
| 72h | 1.86E-07 | 4.72E-08 | 9.90E-08 | 8.64E-08 |
|     | cgd6_90  |          |          |          |
| 2h  | 3.23E-06 | 1.72E-06 | 5.34E-06 | 3.34E-06 |
| 6h  | 4.23E-07 | 3.02E-07 | 1.79E-07 | 1.86E-07 |
| 12h | 1.55E-06 | 1.48E-06 | 2.05E-06 | 1.04E-06 |
| 24h | 1.36E-06 | 1.89E-06 | 1.00E-06 | 1.40E-06 |
| 36h | 1.35E-06 | 1.52E-06 | 1.66E-06 | 4.24E-07 |
| 48h | 5.66E-07 | 1.19E-06 | 1.30E-06 | 1.39E-06 |
| 72h | 4.36E-07 | 1.47E-07 | 2.85E-07 | 3.00E-07 |
|     | cgd6_100 |          |          |          |
| 2h  | 3.63E-06 | 3.21E-06 | 6.83E-06 | 6.50E-06 |
| 6h  | 4.00E-07 | 9.35E-08 | 1.64E-07 | 2.09E-07 |

|     |           |          |          |          |
|-----|-----------|----------|----------|----------|
| 12h | 2.19E-06  | 1.15E-06 | 2.00E-06 | 8.23E-07 |
| 24h | 2.70E-06  | 2.79E-06 | 1.50E-06 | 4.20E-06 |
| 36h | 8.43E-07  | 1.26E-06 | 1.54E-06 | 1.28E-06 |
| 48h | 8.38E-07  | 3.28E-06 | 2.04E-06 | 1.18E-06 |
| 72h | 6.43E-07  | 1.90E-07 | 1.67E-07 | 2.13E-07 |
|     | cgd6_110  |          |          |          |
| 2h  | 3.50E-09  | 0.00E+00 | 7.08E-09 | 0.00E+00 |
| 6h  | 1.93E-08  | 5.29E-08 | 1.65E-08 | 1.43E-08 |
| 12h | 7.43E-09  | 6.83E-10 | 3.88E-08 | 5.01E-08 |
| 24h | 1.51E-08  | 1.91E-07 | 1.04E-07 | 2.66E-08 |
| 36h | 1.44E-07  | 1.82E-07 | 4.73E-07 | 3.27E-07 |
| 48h | 7.82E-08  | 2.36E-07 | 4.75E-07 | 1.05E-07 |
| 72h | 6.62E-08  | 8.26E-08 | 1.44E-07 | 7.57E-08 |
|     | cgd6_1600 |          |          |          |
| 2h  | 8.99E-09  | 3.53E-07 | 3.73E-08 | 1.44E-07 |
| 6h  | 1.08E-07  | 2.74E-07 | 3.18E-07 | 1.63E-05 |
| 12h | 1.07E-08  | 3.20E-08 | 2.18E-08 | 1.90E-07 |
| 24h | 3.75E-08  | 1.57E-07 | 6.51E-08 | 3.58E-07 |
| 36h | 1.14E-07  | 1.36E-07 | 1.92E-07 | 1.12E-07 |
| 48h | 1.55E-07  | 1.20E-07 | 8.96E-08 | 1.21E-07 |
| 72h | 5.82E-08  | 5.69E-08 | 4.88E-08 | 2.75E-07 |
|     | cgd6_1610 |          |          |          |
| 2h  | 1.22E-07  | 9.99E-08 | 4.74E-08 | 1.68E-08 |
| 6h  | 2.33E-08  | 1.00E-07 | 4.12E-08 | 6.08E-08 |
| 12h | 6.50E-08  | 1.37E-07 | 1.78E-07 | 2.52E-07 |
| 24h | 1.58E-07  | 3.98E-07 | 3.72E-07 | 3.04E-07 |
| 36h | 2.35E-07  | 6.98E-07 | 3.78E-07 | 1.96E-07 |
| 48h | 3.25E-07  | 3.00E-07 | 2.91E-07 | 2.43E-07 |
| 72h | 1.51E-07  | 1.30E-07 | 1.34E-07 | 3.29E-07 |
|     | cgd6_1620 |          |          |          |
| 2h  | 4.12E-08  | 9.93E-08 | 4.50E-08 | 8.70E-07 |
| 6h  | 8.57E-07  | 7.77E-07 | 2.74E-06 | 2.24E-06 |
| 12h | 1.83E-08  | 3.88E-08 | 6.06E-08 | 2.83E-07 |
| 24h | 2.57E-07  | 5.37E-07 | 1.99E-07 | 5.69E-07 |
| 36h | 3.87E-07  | 6.80E-07 | 2.61E-07 | 3.49E-07 |
| 48h | 1.72E-07  | 1.35E-07 | 1.99E-07 | 3.08E-07 |
| 72h | 9.91E-08  | 1.08E-07 | 7.09E-08 | 4.15E-07 |
|     | cgd6_1630 |          |          |          |
| 2h  | 0.00E+00  | 0.00E+00 | 2.42E-08 | 0.00E+00 |
| 6h  | 1.87E-04  | 2.26E-04 | 1.73E-04 | 4.21E-04 |
| 12h | 1.76E-06  | 6.18E-06 | 4.94E-06 | 5.85E-06 |
| 24h | 2.11E-05  | 9.98E-05 | 3.00E-05 | 6.99E-05 |
| 36h | 2.66E-05  | 2.54E-05 | 2.30E-05 | 1.42E-05 |
| 48h | 8.94E-06  | 9.82E-06 | 8.04E-06 | 1.09E-05 |
| 72h | 1.82E-06  | 2.08E-06 | 1.16E-06 | 2.87E-06 |
|     | cgd6_1640 |          |          |          |
| 2h  | 3.08E-06  | 1.75E-06 | 1.19E-06 | 0.00E+00 |
| 6h  | 6.01E-04  | 1.16E-03 | 6.75E-04 | 2.34E-05 |
| 12h | 1.20E-05  | 3.16E-05 | 2.25E-05 | 3.24E-06 |
| 24h | 1.16E-04  | 6.81E-04 | 1.25E-04 | 7.75E-06 |
| 36h | 1.61E-04  | 1.75E-04 | 7.32E-05 | 2.30E-06 |
| 48h | 1.96E-04  | 1.88E-04 | 6.69E-05 | 4.24E-06 |
| 72h | 7.06E-05  | 9.31E-05 | 4.99E-05 | 5.52E-06 |

|     |           |          |          |          |
|-----|-----------|----------|----------|----------|
|     | cgd6_1670 |          |          |          |
| 2h  | 2.34E-04  | 2.31E-05 | 3.98E-05 | 0.00E+00 |
| 6h  | 2.03E-04  | 6.61E-05 | 8.37E-05 | 0.00E+00 |
| 12h | 3.79E-05  | 1.53E-05 | 4.88E-05 | 0.00E+00 |
| 24h | 4.61E-05  | 1.69E-05 | 3.77E-05 | 0.00E+00 |
| 36h | 2.20E-05  | 2.75E-05 | 7.38E-05 | 0.00E+00 |
| 48h | 1.34E-05  | 2.05E-05 | 1.32E-05 | 0.00E+00 |
| 72h | 1.78E-05  | 3.53E-05 | 1.65E-05 | 0.00E+00 |
|     | cgd6_1680 |          |          |          |
| 2h  | 5.73E-07  | 2.54E-07 | 5.21E-07 | 0.00E+00 |
| 6h  | 1.76E-06  | 1.43E-06 | 7.76E-07 | 8.84E-06 |
| 12h | 2.86E-07  | 2.93E-07 | 1.55E-07 | 8.29E-06 |
| 24h | 4.97E-07  | 1.04E-06 | 5.06E-07 | 7.13E-06 |
| 36h | 7.72E-07  | 3.63E-07 | 7.44E-07 | 2.54E-06 |
| 48h | 6.02E-07  | 3.31E-07 | 3.18E-07 | 4.28E-06 |
| 72h | 1.68E-07  | 1.02E-07 | 1.77E-07 | 2.17E-06 |
|     | cgd6_1700 |          |          |          |
| 2h  | 2.64E-04  | 2.85E-04 | 6.60E-05 | 1.82E-05 |
| 6h  | 6.33E-04  | 8.48E-04 | 4.15E-04 | 1.96E-05 |
| 12h | 5.22E-04  | 4.39E-04 | 3.47E-04 | 1.08E-05 |
| 24h | 2.26E-04  | 4.19E-04 | 1.55E-04 | 1.61E-05 |
| 36h | 3.35E-04  | 5.19E-04 | 2.40E-04 | 1.69E-06 |
| 48h | 1.46E-04  | 2.36E-04 | 2.24E-04 | 9.31E-07 |
| 72h | 1.33E-04  | 1.26E-04 | 1.17E-04 | 4.70E-06 |
|     | cgd6_1710 |          |          |          |
| 2h  | 0.00E+00  | 0.00E+00 | 0.00E+00 | 0.00E+00 |
| 6h  | 0.00E+00  | 0.00E+00 | 1.17E-07 | 0.00E+00 |
| 12h | 1.16E-05  | 9.27E-06 | 5.62E-05 | 2.89E-06 |
| 24h | 1.12E-05  | 4.29E-06 | 6.48E-06 | 1.39E-06 |
| 36h | 8.75E-05  | 2.32E-05 | 4.43E-05 | 1.01E-06 |
| 48h | 5.15E-05  | 1.28E-04 | 3.81E-05 | 1.70E-06 |
| 72h | 9.01E-05  | 2.30E-05 | 4.86E-05 | 4.43E-06 |
|     | cgd6_1720 |          |          |          |
| 2h  | 1.77E-08  | 0.00E+00 | 0.00E+00 | 1.73E-06 |
| 6h  | 6.07E-08  | 6.91E-08 | 5.93E-08 | 1.80E-05 |
| 12h | 2.76E-06  | 3.00E-06 | 1.14E-05 | 1.27E-04 |
| 24h | 1.93E-06  | 1.23E-06 | 7.97E-07 | 2.35E-05 |
| 36h | 3.17E-06  | 4.83E-06 | 3.92E-06 | 1.93E-05 |
| 48h | 6.46E-06  | 2.07E-06 | 4.47E-06 | 1.80E-05 |
| 72h | 7.73E-07  | 7.28E-07 | 5.31E-07 | 2.12E-05 |
|     | cgd6_1730 |          |          |          |
| 2h  | 1.06E-06  | 8.25E-07 | 2.71E-07 | 4.02E-06 |
| 6h  | 8.22E-07  | 4.91E-07 | 3.54E-07 | 2.17E-05 |
| 12h | 7.18E-07  | 9.81E-07 | 1.70E-06 | 1.03E-05 |
| 24h | 4.49E-07  | 4.22E-07 | 6.89E-07 | 5.20E-06 |
| 36h | 2.83E-06  | 2.80E-06 | 1.64E-06 | 2.64E-05 |
| 48h | 2.04E-06  | 1.21E-06 | 1.61E-06 | 7.74E-06 |
| 72h | 3.26E-07  | 2.02E-07 | 3.00E-07 | 2.80E-06 |
|     | cgd6_1740 |          |          |          |
| 2h  | 1.70E-05  | 9.22E-06 | 3.15E-06 | 4.32E-05 |
| 6h  | 2.14E-06  | 1.02E-05 | 3.74E-06 | 6.17E-05 |
| 12h | 8.74E-07  | 3.37E-06 | 1.17E-06 | 2.29E-05 |
| 24h | 2.38E-06  | 4.77E-06 | 2.24E-06 | 3.02E-05 |

|     |           |          |          |          |
|-----|-----------|----------|----------|----------|
| 36h | 3.14E-06  | 5.22E-06 | 4.85E-06 | 2.07E-05 |
| 48h | 1.72E-06  | 2.01E-06 | 1.36E-06 | 5.31E-06 |
| 72h | 1.79E-07  | 2.42E-07 | 1.07E-07 | 2.44E-06 |
|     | cgd6_2070 |          |          |          |
| 2h  | 1.42E-08  | 9.09E-09 | 2.17E-09 | 3.88E-10 |
| 6h  | 1.17E-07  | 1.92E-07 | 4.83E-08 | 3.02E-08 |
| 12h | 6.81E-10  | 8.82E-09 | 1.12E-09 | 3.19E-09 |
| 24h | 7.80E-09  | 1.01E-07 | 2.52E-08 | 8.55E-08 |
| 36h | 7.49E-08  | 2.62E-08 | 2.71E-08 | 8.28E-08 |
| 48h | 3.84E-08  | 2.65E-08 | 2.32E-08 | 5.26E-08 |
| 72h | 1.99E-08  | 1.66E-10 | 2.31E-09 | 4.14E-09 |
|     | cgd6_2080 |          |          |          |
| 2h  | 3.02E-05  | 1.09E-06 | 2.22E-06 | 1.43E-06 |
| 6h  | 9.53E-06  | 4.92E-06 | 2.69E-06 | 6.34E-06 |
| 12h | 4.92E-07  | 2.68E-06 | 3.28E-07 | 8.91E-07 |
| 24h | 2.42E-06  | 3.43E-06 | 3.18E-06 | 6.67E-06 |
| 36h | 2.45E-06  | 1.57E-06 | 1.28E-06 | 2.52E-06 |
| 48h | 2.25E-06  | 3.84E-07 | 7.12E-07 | 2.74E-06 |
| 72h | 6.65E-07  | 2.07E-07 | 1.38E-07 | 1.11E-06 |
|     | cgd6_2090 |          |          |          |
| 2h  | 1.59E-03  | 3.64E-06 | 7.23E-06 | 2.55E-05 |
| 6h  | 4.41E-05  | 6.05E-06 | 5.33E-06 | 3.79E-06 |
| 12h | 2.82E-05  | 3.50E-06 | 3.39E-07 | 7.63E-07 |
| 24h | 1.49E-05  | 1.66E-05 | 4.98E-06 | 8.05E-06 |
| 36h | 2.31E-05  | 5.59E-06 | 2.21E-06 | 1.53E-05 |
| 48h | 2.27E-02  | 1.28E-03 | 1.35E-03 | 3.51E-03 |
| 72h | 5.31E-03  | 6.74E-04 | 1.05E-04 | 1.14E-03 |
|     | cgd6_2100 |          |          |          |
| 2h  | 1.33E-06  | 1.85E-07 | 7.04E-08 | 1.58E-07 |
| 6h  | 5.19E-07  | 3.15E-07 | 2.63E-07 | 1.15E-07 |
| 12h | 1.73E-08  | 1.37E-07 | 4.36E-09 | 3.07E-08 |
| 24h | 3.51E-07  | 1.86E-07 | 2.69E-07 | 3.09E-07 |
| 36h | 5.59E-07  | 4.19E-07 | 1.16E-07 | 7.99E-07 |
| 48h | 2.70E-06  | 2.58E-07 | 2.02E-07 | 6.74E-07 |
| 72h | 1.61E-06  | 8.60E-08 | 1.34E-07 | 3.28E-07 |
|     | cgd6_2110 |          |          |          |
| 2h  | 4.35E-07  | 9.50E-08 | 1.51E-07 | 2.50E-07 |
| 6h  | 2.07E-07  | 1.69E-07 | 5.74E-08 | 1.27E-07 |
| 12h | 2.04E-08  | 1.84E-07 | 4.81E-08 | 1.31E-08 |
| 24h | 1.21E-07  | 1.37E-07 | 1.12E-07 | 1.79E-07 |
| 36h | 3.37E-07  | 4.90E-07 | 4.24E-07 | 3.33E-07 |
| 48h | 2.55E-06  | 1.38E-07 | 1.22E-07 | 1.60E-07 |
| 72h | 1.18E-07  | 1.44E-07 | 9.66E-08 | 1.39E-07 |
|     | cgd6_2120 |          |          |          |
| 2h  | 4.38E-07  | 3.85E-07 | 1.06E-07 | 1.06E-07 |
| 6h  | 4.32E-07  | 4.49E-07 | 1.14E-07 | 3.29E-07 |
| 12h | 2.35E-08  | 4.10E-07 | 6.44E-10 | 7.53E-08 |
| 24h | 1.09E-07  | 2.24E-07 | 5.92E-08 | 3.93E-06 |
| 36h | 2.78E-07  | 2.49E-07 | 2.40E-07 | 2.92E-07 |
| 48h | 5.10E-07  | 1.61E-07 | 4.98E-08 | 1.08E-07 |
| 72h | 4.64E-08  | 1.78E-07 | 5.06E-08 | 1.20E-07 |
|     | cgd6_2130 |          |          |          |
| 2h  | 8.11E-06  | 1.62E-06 | 6.85E-07 | 1.30E-06 |

|     |           |          |          |          |
|-----|-----------|----------|----------|----------|
| 6h  | 6.02E-06  | 3.57E-06 | 6.09E-07 | 2.21E-06 |
| 12h | 3.14E-07  | 2.17E-06 | 1.57E-08 | 6.11E-07 |
| 24h | 4.73E-07  | 9.78E-07 | 2.91E-07 | 7.60E-07 |
| 36h | 6.83E-07  | 9.20E-07 | 3.83E-07 | 4.37E-07 |
| 48h | 4.73E-07  | 6.17E-07 | 2.43E-07 | 4.83E-07 |
| 72h | 5.58E-07  | 1.50E-07 | 1.29E-07 | 2.31E-07 |
|     | cgd6_2140 |          |          |          |
| 2h  | 5.70E-06  | 1.68E-08 | 4.63E-07 | 7.75E-07 |
| 6h  | 3.23E-06  | 2.72E-08 | 8.70E-08 | 1.53E-06 |
| 12h | 0.00E+00  | 6.55E-08 | 8.16E-08 | 1.10E-07 |
| 24h | 1.62E-06  | 8.79E-07 | 9.03E-08 | 6.27E-07 |
| 36h | 4.64E-06  | 5.21E-07 | 2.57E-07 | 1.28E-06 |
| 48h | 2.48E-05  | 3.40E-06 | 1.16E-06 | 5.69E-06 |
| 72h | 5.31E-06  | 1.31E-06 | 6.06E-07 | 2.51E-06 |
|     | cgd6_2150 |          |          |          |
| 2h  | 1.01E-03  | 4.64E-04 | 1.50E-04 | 1.00E-03 |
| 6h  | 9.21E-03  | 1.09E-03 | 1.61E-04 | 1.48E-03 |
| 12h | 7.82E-04  | 7.99E-04 | 5.80E-05 | 3.29E-04 |
| 24h | 7.06E-04  | 8.85E-04 | 8.71E-05 | 1.17E-03 |
| 36h | 6.44E-04  | 3.87E-04 | 7.47E-05 | 4.89E-04 |
| 48h | 3.04E-04  | 3.86E-04 | 3.56E-05 | 5.09E-04 |
| 72h | 1.50E-03  | 1.05E-04 | 2.31E-05 | 2.79E-04 |
|     | cgd6_2170 |          |          |          |
| 2h  | 4.80E-05  | 2.19E-05 | 1.27E-05 | 2.08E-05 |
| 6h  | 1.57E-04  | 7.67E-05 | 2.16E-05 | 1.02E-01 |
| 12h | 1.93E-05  | 4.81E-05 | 3.47E-06 | 1.55E-05 |
| 24h | 2.12E-05  | 7.42E-05 | 1.60E-05 | 2.46E-05 |
| 36h | 8.27E-06  | 8.85E-06 | 5.56E-06 | 1.84E-05 |
| 48h | 1.77E-05  | 9.53E-06 | 4.58E-06 | 7.01E-06 |
| 72h | 1.64E-05  | 5.30E-07 | 6.72E-07 | 3.94E-06 |
|     | cgd6_2180 |          |          |          |
| 2h  | 1.03E-03  | 1.79E-04 | 1.43E-04 | 3.87E-04 |
| 6h  | 1.01E-03  | 8.96E-04 | 1.03E-04 | 3.57E-04 |
| 12h | 8.24E-05  | 3.48E-04 | 3.45E-05 | 2.52E-04 |
| 24h | 1.98E-04  | 4.09E-04 | 9.47E-05 | 4.30E-04 |
| 36h | 1.09E-04  | 8.65E-05 | 4.11E-05 | 2.51E-04 |
| 48h | 7.73E-04  | 9.97E-05 | 2.62E-05 | 1.88E-04 |
| 72h | 2.82E-05  | 1.36E-05 | 3.42E-06 | 8.26E-05 |
|     | cgd6_2190 |          |          |          |
| 2h  | 1.11E-07  | 0.00E+00 | 0.00E+00 | 3.88E-08 |
| 6h  | 1.33E-07  | 9.46E-07 | 1.92E-07 | 1.03E-07 |
| 12h | 3.88E-08  | 2.93E-07 | 4.66E-08 | 5.78E-08 |
| 24h | 6.92E-08  | 1.35E-06 | 6.62E-08 | 4.00E-07 |
| 36h | 3.05E-07  | 3.38E-07 | 3.66E-07 | 3.91E-07 |
| 48h | 4.83E-07  | 1.36E-06 | 5.79E-08 | 2.66E-07 |
| 72h | 4.37E-07  | 3.07E-06 | 1.58E-07 | 3.06E-07 |
|     | cgd6_2200 |          |          |          |
| 2h  | 1.45E-04  | 3.37E-07 | 2.73E-07 | 2.14E-07 |
| 6h  | 1.42E-07  | 4.71E-07 | 1.43E-06 | 8.71E-07 |
| 12h | 7.50E-06  | 5.68E-06 | 2.52E-05 | 4.40E-06 |
| 24h | 5.13E-06  | 1.29E-06 | 1.55E-05 | 4.12E-06 |
| 36h | 7.09E-06  | 1.82E-06 | 3.38E-05 | 2.32E-05 |
| 48h | 5.98E-06  | 3.17E-07 | 9.38E-06 | 4.86E-06 |

|     |           |          |          |          |
|-----|-----------|----------|----------|----------|
| 72h | 5.83E-07  | 2.30E-07 | 8.06E-07 | 5.90E-07 |
|     | cgd6_2210 |          |          |          |
| 2h  | 6.39E-07  | 5.68E-07 | 1.62E-06 | 1.40E-06 |
| 6h  | 4.96E-06  | 3.22E-06 | 1.06E-05 | 2.99E-06 |
| 12h | 6.85E-05  | 2.40E-05 | 1.37E-04 | 1.16E-05 |
| 24h | 1.27E-05  | 5.42E-06 | 6.18E-05 | 9.51E-06 |
| 36h | 1.17E-05  | 6.26E-06 | 9.36E-05 | 2.99E-05 |
| 48h | 1.31E-05  | 1.79E-06 | 1.83E-05 | 6.14E-06 |
| 72h | 3.56E-06  | 5.96E-07 | 1.46E-06 | 1.26E-06 |
|     | cgd6_2220 |          |          |          |
| 2h  | 1.93E-08  | 3.68E-08 | 6.72E-08 | 1.82E-08 |
| 6h  | 8.28E-08  | 6.69E-08 | 1.90E-07 | 8.12E-08 |
| 12h | 3.16E-05  | 4.82E-05 | 3.87E-05 | 1.13E-05 |
| 24h | 2.25E-06  | 5.84E-06 | 1.92E-05 | 6.18E-06 |
| 36h | 1.06E-05  | 4.24E-06 | 3.23E-05 | 1.91E-05 |
| 48h | 9.46E-07  | 6.78E-07 | 2.14E-06 | 2.39E-06 |
| 72h | 2.68E-07  | 1.69E-07 | 4.16E-07 | 1.91E-07 |
|     | cgd6_2240 |          |          |          |
| 2h  | 1.16E-03  | 1.36E-05 | 1.84E-05 | 1.62E-04 |
| 6h  | 2.38E-03  | 5.38E-05 | 3.28E-03 | 9.71E-04 |
| 12h | 8.31E-04  | 8.96E-06 | 1.40E-03 | 2.47E-05 |
| 24h | 4.80E-04  | 4.65E-05 | 6.26E-03 | 7.80E-04 |
| 36h | 3.10E-03  | 1.41E-04 | 1.36E-03 | 1.66E-03 |
| 48h | 4.69E-04  | 2.17E-05 | 1.01E-03 | 5.64E-04 |
| 72h | 1.42E-04  | 4.72E-05 | 2.85E-04 | 2.43E-04 |
|     | cgd6_2250 |          |          |          |
| 2h  | 4.25E-06  | 0.00E+00 | 0.00E+00 | 0.00E+00 |
| 6h  | 4.44E-07  | 2.23E-07 | 2.27E-06 | 9.09E-07 |
| 12h | 0.00E+00  | 4.38E-07 | 1.02E-05 | 1.66E-05 |
| 24h | 2.30E-05  | 8.88E-07 | 1.16E-05 | 7.06E-06 |
| 36h | 4.86E-05  | 4.76E-06 | 9.78E-05 | 3.37E-05 |
| 48h | 1.87E-03  | 3.10E-06 | 1.28E-04 | 8.53E-05 |
| 72h | 9.22E-05  | 3.67E-06 | 1.06E-04 | 8.13E-05 |
|     | cgd6_2260 |          |          |          |
| 2h  | 1.09E-04  | 9.57E-06 | 5.57E-05 | 7.18E-05 |
| 6h  | 1.29E-05  | 2.66E-06 | 3.68E-05 | 9.14E-06 |
| 12h | 1.57E-04  | 3.18E-05 | 4.74E-04 | 3.22E-05 |
| 24h | 7.72E-05  | 1.60E-05 | 2.82E-04 | 3.02E-05 |
| 36h | 3.96E-05  | 1.21E-05 | 6.72E-05 | 4.25E-05 |
| 48h | 1.39E-04  | 2.13E-06 | 4.98E-05 | 1.58E-05 |
| 72h | 1.76E-05  | 5.46E-06 | 1.24E-05 | 5.16E-06 |
|     | cgd6_2270 |          |          |          |
| 2h  | 3.10E-06  | 6.30E-07 | 9.17E-07 | 4.83E-06 |
| 6h  | 7.63E-07  | 3.86E-07 | 6.91E-07 | 3.06E-07 |
| 12h | 2.26E-06  | 2.30E-07 | 4.85E-06 | 8.31E-07 |
| 24h | 6.65E-07  | 1.32E-06 | 5.13E-06 | 8.01E-07 |
| 36h | 5.06E-07  | 7.46E-07 | 1.14E-06 | 1.29E-06 |
| 48h | 4.92E-07  | 4.03E-07 | 1.66E-06 | 5.14E-07 |
| 72h | 8.52E-08  | 2.20E-07 | 1.61E-07 | 1.56E-07 |
|     | cgd6_2280 |          |          |          |
| 2h  | 2.52E-04  | 4.35E-06 | 4.13E-06 | 5.30E-05 |
| 6h  | 1.69E-04  | 3.97E-06 | 1.18E-04 | 4.63E-05 |
| 12h | 5.80E-04  | 1.06E-05 | 3.51E-04 | 4.53E-05 |

|           |          |          |          |          |
|-----------|----------|----------|----------|----------|
| 24h       | 1.56E-04 | 7.36E-06 | 1.21E-03 | 8.94E-05 |
| 36h       | 2.30E-04 | 1.90E-05 | 3.06E-04 | 1.92E-04 |
| 48h       | 5.21E-04 | 8.04E-06 | 3.06E-04 | 1.12E-04 |
| 72h       | 3.95E-05 | 4.31E-06 | 1.08E-03 | 1.35E-05 |
| cgd6_2290 |          |          |          |          |
| 2h        | 2.05E-08 | 7.40E-08 | 1.00E-07 | 2.22E-07 |
| 6h        | 3.72E-06 | 2.46E-07 | 1.43E-05 | 8.94E-07 |
| 12h       | 6.42E-07 | 9.38E-07 | 1.02E-06 | 2.87E-07 |
| 24h       | 1.84E-06 | 2.38E-07 | 1.48E-05 | 1.74E-06 |
| 36h       | 2.22E-06 | 1.11E-06 | 3.18E-06 | 2.41E-06 |
| 48h       | 2.12E-06 | 4.85E-07 | 3.35E-06 | 2.43E-06 |
| 72h       | 1.04E-06 | 4.70E-07 | 3.02E-06 | 7.56E-07 |
| cgd6_2300 |          |          |          |          |
| 2h        | 4.72E-06 | 1.33E-07 | 0.00E+00 | 2.38E-07 |
| 6h        | 5.51E-05 | 2.91E-05 | 2.34E-03 | 1.31E-04 |
| 12h       | 2.20E-03 | 9.38E-06 | 1.91E-03 | 1.27E-04 |
| 24h       | 2.70E-04 | 4.11E-05 | 4.23E-03 | 1.04E-03 |
| 36h       | 7.00E-04 | 7.14E-05 | 5.76E-03 | 9.08E-04 |
| 48h       | 1.65E-03 | 8.20E-05 | 3.08E-03 | 1.18E-03 |
| 72h       | 2.08E-03 | 7.65E-06 | 3.39E-04 | 6.51E-05 |
| cgd6_2310 |          |          |          |          |
| 2h        | 1.65E-07 | 2.59E-08 | 4.19E-09 | 4.95E-08 |
| 6h        | 5.27E-08 | 2.04E-08 | 3.44E-08 | 1.90E-08 |
| 12h       | 2.91E-07 | 9.81E-08 | 1.13E-06 | 2.00E-07 |
| 24h       | 1.83E-07 | 2.03E-07 | 2.55E-06 | 3.55E-07 |
| 36h       | 1.07E-06 | 7.80E-07 | 3.30E-06 | 2.05E-06 |
| 48h       | 3.90E-07 | 3.29E-07 | 1.53E-06 | 5.44E-07 |
| 72h       | 5.37E-08 | 5.84E-08 | 8.20E-08 | 1.06E-07 |
| cgd6_2320 |          |          |          |          |
| 2h        | 4.62E-06 | 5.09E-06 | 7.32E-07 | 1.11E-05 |
| 6h        | 3.02E-06 | 3.93E-07 | 2.03E-05 | 1.04E-05 |
| 12h       | 3.14E-06 | 1.32E-07 | 1.65E-05 | 4.88E-06 |
| 24h       | 3.18E-06 | 1.65E-06 | 4.23E-05 | 7.80E-06 |
| 36h       | 5.18E-06 | 4.18E-06 | 1.84E-05 | 1.58E-05 |
| 48h       | 6.05E-06 | 1.63E-06 | 8.44E-06 | 4.49E-06 |
| 72h       | 2.38E-06 | 7.51E-07 | 2.20E-04 | 2.35E-06 |
| cgd6_3770 |          |          |          |          |
| 2h        | 8.48E-09 | 2.52E-08 | 0.00E+00 | 6.24E-09 |
| 6h        | 3.48E-07 | 8.17E-08 | 2.67E-07 | 4.09E-07 |
| 12h       | 1.99E-07 | 4.52E-07 | 5.49E-07 | 8.57E-07 |
| 24h       | 4.23E-07 | 4.84E-07 | 5.64E-06 | 7.39E-07 |
| 36h       | 1.10E-06 | 1.31E-06 | 4.34E-06 | 1.78E-06 |
| 48h       | 7.47E-07 | 4.89E-07 | 1.63E-06 | 7.38E-07 |
| 72h       | 2.46E-07 | 4.62E-07 | 1.26E-06 | 3.27E-07 |
| cgd6_3780 |          |          |          |          |
| 2h        | 0.00E+00 | 0.00E+00 | 0.00E+00 | 0.00E+00 |
| 6h        | 1.01E-05 | 1.02E-04 | 5.43E-05 | 1.60E-04 |
| 12h       | 3.22E-05 | 4.12E-03 | 1.49E-04 | 9.97E-04 |
| 24h       | 3.36E-05 | 3.16E-04 | 1.04E-03 | 7.93E-04 |
| 36h       | 7.77E-05 | 1.18E-04 | 1.01E-03 | 1.07E-03 |
| 48h       | 4.78E-05 | 2.64E-04 | 5.11E-04 | 5.52E-04 |
| 72h       | 3.17E-05 | 2.72E-04 | 3.46E-04 | 6.29E-04 |
| cgd6_3790 |          |          |          |          |

|     |           |          |          |          |
|-----|-----------|----------|----------|----------|
| 2h  | 1.32E-07  | 4.75E-07 | 9.70E-07 | 6.38E-07 |
| 6h  | 2.34E-07  | 1.12E-07 | 2.91E-07 | 9.02E-08 |
| 12h | 3.58E-05  | 5.02E-05 | 3.65E-05 | 3.46E-05 |
| 24h | 1.00E-05  | 1.42E-05 | 1.01E-05 | 8.45E-06 |
| 36h | 1.68E-05  | 6.94E-06 | 3.85E-05 | 1.28E-05 |
| 48h | 6.41E-06  | 4.57E-06 | 1.43E-05 | 1.11E-05 |
| 72h | 2.18E-06  | 2.70E-06 | 4.80E-06 | 1.39E-06 |
|     | cgd6_3800 |          |          |          |
| 2h  | 1.29E-06  | 1.97E-06 | 1.05E-05 | 3.71E-07 |
| 6h  | 2.24E-07  | 4.27E-06 | 5.96E-08 | 6.01E-06 |
| 12h | 6.70E-07  | 1.28E-06 | 1.13E-06 | 3.03E-06 |
| 24h | 2.24E-06  | 7.09E-06 | 2.74E-06 | 2.93E-06 |
| 36h | 1.94E-06  | 7.50E-06 | 5.28E-06 | 5.32E-06 |
| 48h | 2.80E-06  | 5.51E-06 | 5.08E-06 | 3.82E-06 |
| 72h | 7.95E-06  | 2.17E-05 | 2.09E-05 | 1.44E-05 |
|     | cgd6_3810 |          |          |          |
| 2h  | 3.14E-06  | 1.15E-04 | 1.27E-05 | 1.73E-05 |
| 6h  | 9.27E-06  | 4.02E-05 | 1.72E-05 | 5.60E-05 |
| 12h | 4.99E-07  | 2.39E-06 | 1.35E-05 | 4.06E-05 |
| 24h | 4.47E-06  | 5.33E-05 | 4.10E-05 | 3.50E-05 |
| 36h | 2.96E-05  | 3.24E-05 | 6.12E-05 | 1.67E-05 |
| 48h | 6.68E-06  | 8.07E-05 | 2.43E-05 | 3.26E-05 |
| 72h | 3.24E-05  | 9.28E-05 | 5.14E-05 | 3.94E-05 |
|     | cgd6_3820 |          |          |          |
| 2h  | 1.11E-07  | 1.72E-07 | 2.41E-07 | 3.65E-08 |
| 6h  | 4.64E-07  | 1.78E-07 | 2.64E-07 | 4.18E-07 |
| 12h | 4.17E-08  | 5.16E-08 | 4.49E-07 | 6.08E-08 |
| 24h | 1.95E-07  | 1.06E-07 | 3.91E-07 | 2.94E-07 |
| 36h | 5.56E-07  | 6.19E-07 | 9.72E-07 | 2.40E-07 |
| 48h | 7.12E-07  | 5.26E-07 | 1.95E-06 | 8.18E-07 |
| 72h | 2.08E-06  | 1.98E-06 | 2.81E-06 | 1.10E-06 |
|     | cgd6_3830 |          |          |          |
| 2h  | 1.18E-06  | 1.59E-05 | 0.00E+00 | 1.89E-06 |
| 6h  | 0.00E+00  | 3.84E-07 | 8.92E-08 | 3.61E-06 |
| 12h | 1.51E-06  | 1.90E-04 | 9.20E-06 | 6.60E-05 |
| 24h | 2.24E-06  | 8.12E-05 | 1.78E-05 | 4.13E-05 |
| 36h | 2.38E-05  | 5.71E-04 | 6.64E-05 | 1.47E-04 |
| 48h | 2.07E-05  | 4.19E-04 | 4.81E-05 | 1.74E-04 |
| 72h | 4.77E-05  | 1.05E-03 | 2.80E-04 | 2.27E-04 |
|     | cgd6_3840 |          |          |          |
| 2h  | 2.28E-06  | 4.06E-06 | 4.24E-07 | 1.63E-06 |
| 6h  | 5.34E-07  | 2.02E-05 | 4.75E-07 | 2.90E-06 |
| 12h | 8.84E-07  | 1.09E-06 | 3.10E-06 | 6.08E-06 |
| 24h | 1.97E-06  | 8.10E-06 | 3.43E-06 | 2.56E-06 |
| 36h | 1.60E-06  | 4.38E-06 | 2.69E-06 | 2.88E-06 |
| 48h | 1.08E-06  | 1.79E-06 | 3.18E-06 | 2.36E-06 |
| 72h | 8.90E-07  | 1.08E-06 | 8.59E-07 | 9.97E-07 |
|     | cgd6_3860 |          |          |          |
| 2h  | 2.27E-04  | 7.47E-05 | 2.67E-04 | 2.66E-04 |
| 6h  | 1.60E-04  | 2.39E-04 | 3.10E-03 | 1.45E-03 |
| 12h | 2.60E-06  | 1.53E-04 | 3.13E-05 | 1.56E-04 |
| 24h | 2.36E-04  | 8.69E-05 | 6.22E-03 | 1.80E-04 |
| 36h | 4.29E-04  | 1.26E-04 | 1.42E-03 | 1.15E-04 |



|     |           |          |          |          |
|-----|-----------|----------|----------|----------|
| 48h | 2.22E-04  | 2.12E-04 | 7.62E-04 | 1.80E-04 |
| 72h | 9.65E-05  | 1.07E-04 | 3.41E-04 | 1.13E-04 |
|     | cgd6_3870 |          |          |          |
| 2h  | 1.51E-06  | 4.60E-06 | 9.48E-07 | 2.00E-07 |
| 6h  | 2.80E-06  | 2.44E-06 | 7.46E-06 | 1.11E-05 |
| 12h | 1.21E-07  | 5.31E-07 | 1.19E-06 | 1.28E-06 |
| 24h | 1.61E-06  | 1.95E-06 | 1.38E-05 | 4.47E-06 |
| 36h | 1.24E-06  | 2.18E-06 | 1.30E-06 | 1.61E-06 |
| 48h | 1.98E-06  | 1.93E-06 | 2.54E-06 | 9.60E-07 |
| 72h | 6.56E-08  | 8.67E-07 | 1.22E-07 | 1.13E-07 |
|     | cgd6_3890 |          |          |          |
| 2h  | 1.72E-05  | 5.58E-06 | 2.95E-05 | 1.25E-04 |
| 6h  | 1.97E-05  | 1.74E-05 | 1.16E-04 | 1.07E-03 |
| 12h | 4.25E-05  | 5.55E-05 | 1.11E-04 | 7.25E-04 |
| 24h | 6.29E-05  | 2.46E-04 | 1.40E-03 | 9.93E-04 |
| 36h | 5.72E-04  | 1.94E-04 | 1.77E-03 | 6.37E-04 |
| 48h | 1.19E-03  | 2.54E-04 | 5.33E-03 | 4.73E-03 |
| 72h | 6.44E-04  | 4.22E-04 | 2.73E-03 | 1.33E-03 |
|     | cgd6_3900 |          |          |          |
| 2h  | 1.73E-08  | 0.00E+00 | 0.00E+00 | 8.50E-09 |
| 6h  | 6.20E-07  | 2.34E-07 | 1.04E-06 | 1.10E-06 |
| 12h | 4.76E-07  | 2.91E-07 | 4.30E-07 | 1.46E-07 |
| 24h | 3.52E-07  | 3.67E-07 | 5.90E-06 | 9.46E-07 |
| 36h | 1.72E-06  | 9.56E-07 | 1.06E-06 | 1.12E-06 |
| 48h | 4.70E-07  | 8.71E-07 | 5.36E-07 | 6.69E-07 |
| 72h | 1.85E-06  | 4.25E-05 | 8.22E-07 | 1.11E-06 |
|     | cgd6_2340 |          |          |          |
| 2h  | 2.29E-06  | 1.70E-06 | 2.10E-06 | 5.71E-06 |
| 6h  | 8.74E-06  | 2.91E-06 | 2.68E-06 | 8.66E-06 |
| 12h | 2.50E-07  | 4.39E-06 | 7.39E-07 | 3.67E-06 |
| 24h | 3.03E-06  | 5.25E-06 | 3.31E-06 | 4.92E-06 |
| 36h | 1.22E-06  | 1.85E-06 | 7.15E-07 | 2.01E-06 |
| 48h | 5.25E-07  | 1.30E-06 | 6.49E-07 | 2.93E-07 |
| 72h | 3.87E-07  | 1.41E-07 | 9.25E-08 | 9.44E-08 |
|     | cgd6_2350 |          |          |          |
| 2h  | 2.19E-06  | 4.06E-07 | 1.70E-06 | 4.48E-06 |
| 6h  | 9.05E-07  | 7.54E-07 | 2.66E-06 | 3.43E-06 |
| 12h | 8.51E-07  | 1.83E-06 | 8.86E-07 | 1.37E-05 |
| 24h | 2.18E-06  | 3.01E-06 | 1.52E-06 | 3.86E-06 |
| 36h | 5.37E-07  | 4.44E-07 | 4.58E-07 | 1.22E-06 |
| 48h | 1.54E-07  | 5.03E-07 | 3.54E-07 | 4.10E-07 |
| 72h | 1.88E-07  | 9.99E-08 | 7.77E-08 | 1.04E-07 |
|     | cgd6_2360 |          |          |          |
| 2h  | 5.19E-07  | 1.59E-07 | 4.52E-07 | 3.91E-07 |
| 6h  | 4.75E-07  | 2.33E-07 | 1.91E-07 | 3.99E-07 |
| 12h | 1.01E-07  | 2.14E-07 | 8.59E-08 | 1.11E-07 |
| 24h | 8.97E-08  | 3.29E-07 | 1.53E-07 | 4.53E-07 |
| 36h | 2.24E-07  | 1.65E-07 | 8.33E-08 | 1.38E-07 |
| 48h | 5.62E-08  | 1.30E-07 | 1.07E-07 | 2.13E-05 |
| 72h | 1.04E-07  | 2.74E-08 | 4.10E-08 | 1.97E-08 |
|     | cgd6_2370 |          |          |          |
| 2h  | 1.11E-06  | 1.57E-07 | 4.84E-07 | 3.13E-07 |
| 6h  | 2.45E-07  | 5.74E-07 | 3.14E-07 | 2.09E-06 |

|     |           |          |          |          |
|-----|-----------|----------|----------|----------|
| 12h | 0.00E+00  | 1.17E-07 | 4.22E-08 | 5.60E-08 |
| 24h | 4.90E-08  | 4.86E-07 | 1.95E-07 | 7.02E-07 |
| 36h | 3.63E-07  | 3.73E-07 | 1.47E-07 | 4.44E-07 |
| 48h | 8.13E-08  | 2.47E-07 | 1.10E-07 | 2.20E-07 |
| 72h | 2.03E-07  | 8.72E-08 | 4.77E-08 | 5.85E-08 |
|     | cgd6_2390 |          |          |          |
| 2h  | 3.52E-05  | 4.39E-06 | 2.20E-05 | 6.50E-05 |
| 6h  | 5.10E-05  | 9.51E-05 | 1.88E-05 | 5.91E-04 |
| 12h | 1.58E-06  | 2.02E-05 | 1.37E-06 | 7.62E-06 |
| 24h | 2.41E-05  | 6.37E-05 | 9.86E-06 | 1.83E-04 |
| 36h | 5.25E-05  | 2.34E-05 | 2.01E-05 | 4.04E-05 |
| 48h | 1.05E-05  | 1.38E-05 | 5.68E-06 | 2.18E-05 |
| 72h | 1.26E-05  | 2.50E-06 | 2.60E-06 | 4.13E-06 |
|     | cgd6_2410 |          |          |          |
| 2h  | 1.48E-07  | 8.62E-09 | 8.24E-07 | 4.31E-07 |
| 6h  | 6.39E-06  | 2.66E-06 | 1.82E-06 | 1.60E-05 |
| 12h | 1.07E-07  | 3.06E-07 | 6.90E-08 | 3.02E-07 |
| 24h | 8.05E-07  | 4.10E-06 | 2.37E-07 | 6.63E-06 |
| 36h | 2.29E-06  | 2.35E-06 | 2.49E-06 | 2.50E-06 |
| 48h | 1.16E-06  | 6.04E-07 | 6.05E-07 | 1.28E-06 |
| 72h | 6.89E-07  | 2.42E-07 | 2.71E-07 | 2.32E-07 |
|     | cgd6_2430 |          |          |          |
| 2h  | 2.48E-05  | 2.93E-06 | 8.75E-06 | 1.47E-05 |
| 6h  | 6.16E-05  | 1.06E-04 | 4.13E-05 | 1.63E-04 |
| 12h | 6.34E-05  | 1.88E-05 | 9.19E-06 | 1.76E-05 |
| 24h | 1.84E-05  | 4.21E-05 | 1.79E-05 | 7.60E-05 |
| 36h | 2.42E-05  | 7.68E-06 | 1.34E-05 | 1.27E-05 |
| 48h | 7.04E-06  | 4.21E-06 | 5.41E-06 | 3.58E-06 |
| 72h | 1.53E-06  | 7.87E-07 | 8.95E-07 | 9.97E-07 |
|     | cgd6_2440 |          |          |          |
| 2h  | 7.76E-06  | 1.28E-07 | 1.83E-06 | 2.94E-05 |
| 6h  | 3.95E-07  | 1.26E-06 | 1.38E-06 | 1.36E-06 |
| 12h | 2.28E-03  | 8.09E-04 | 7.67E-04 | 1.27E-03 |
| 24h | 3.67E-04  | 6.24E-05 | 1.05E-04 | 3.74E-04 |
| 36h | 2.41E-04  | 2.36E-04 | 1.54E-04 | 5.47E-04 |
| 48h | 2.07E-04  | 4.78E-05 | 1.18E-04 | 2.12E-04 |
| 72h | 9.64E-05  | 2.81E-05 | 4.22E-05 | 1.14E-04 |
|     | cgd6_2450 |          |          |          |
| 2h  | 3.25E-06  | 1.96E-07 | 2.67E-06 | 2.25E-06 |
| 6h  | 5.15E-08  | 7.08E-08 | 4.48E-08 | 2.58E-07 |
| 12h | 5.48E-05  | 4.28E-05 | 3.29E-05 | 2.76E-05 |
| 24h | 1.74E-05  | 4.89E-06 | 1.29E-05 | 1.22E-05 |
| 36h | 1.66E-05  | 3.80E-05 | 1.28E-05 | 2.33E-05 |
| 48h | 4.58E-05  | 3.72E-05 | 3.88E-05 | 4.04E-05 |
| 72h | 3.10E-05  | 1.80E-05 | 3.09E-05 | 1.55E-05 |
|     | cgd6_2460 |          |          |          |
| 2h  | 3.36E-04  | 9.97E-05 | 2.23E-04 | 5.93E-04 |
| 6h  | 5.65E-04  | 9.53E-04 | 6.50E-04 | 2.61E-03 |
| 12h | 3.04E-05  | 1.74E-04 | 4.11E-05 | 3.50E-04 |
| 24h | 3.91E-04  | 5.46E-04 | 2.13E-04 | 9.01E-04 |
| 36h | 9.98E-05  | 8.85E-05 | 6.52E-05 | 1.44E-04 |
| 48h | 9.48E-05  | 1.01E-04 | 1.01E-04 | 1.20E-04 |
| 72h | 5.92E-06  | 5.01E-06 | 8.79E-06 | 1.60E-05 |

|     |           |          |          |          |
|-----|-----------|----------|----------|----------|
|     | cgd6_2470 |          |          |          |
| 2h  | 6.59E-06  | 1.21E-06 | 1.50E-06 | 2.19E-06 |
| 6h  | 1.70E-06  | 2.37E-06 | 1.77E-06 | 2.23E-06 |
| 12h | 5.35E-07  | 1.03E-06 | 1.27E-07 | 7.34E-07 |
| 24h | 2.66E-06  | 1.42E-06 | 1.25E-06 | 2.55E-06 |
| 36h | 1.50E-06  | 1.08E-06 | 9.50E-07 | 8.83E-07 |
| 48h | 2.72E-06  | 8.45E-07 | 1.25E-06 | 6.23E-07 |
| 72h | 3.07E-07  | 2.86E-07 | 1.97E-07 | 7.89E-08 |
|     | cgd6_2480 |          |          |          |
| 2h  | 2.87E-05  | 1.83E-05 | 3.75E-05 | 7.99E-05 |
| 6h  | 3.07E-05  | 1.94E-05 | 1.25E-05 | 5.66E-05 |
| 12h | 8.13E-07  | 1.65E-05 | 5.23E-06 | 1.07E-05 |
| 24h | 1.64E-05  | 1.07E-05 | 6.19E-06 | 2.88E-05 |
| 36h | 1.01E-05  | 6.74E-06 | 6.92E-06 | 1.85E-05 |
| 48h | 2.76E-06  | 3.48E-06 | 1.75E-06 | 4.77E-06 |
| 72h | 5.23E-06  | 2.02E-06 | 9.37E-07 | 2.29E-06 |
|     | cgd6_2490 |          |          |          |
| 2h  | 4.93E-07  | 2.30E-07 | 1.97E-08 | 5.97E-08 |
| 6h  | 4.38E-07  | 1.87E-07 | 1.05E-07 | 4.77E-08 |
| 12h | 7.24E-09  | 4.35E-09 | 1.04E-07 | 2.75E-08 |
| 24h | 2.15E-07  | 1.54E-07 | 1.19E-07 | 1.41E-07 |
| 36h | 8.99E-08  | 1.60E-07 | 2.20E-07 | 1.75E-07 |
| 48h | 2.01E-07  | 2.06E-07 | 1.19E-07 | 1.70E-07 |
| 72h | 4.04E-08  | 5.32E-08 | 8.61E-08 | 6.61E-08 |
|     | cgd6_2500 |          |          |          |
| 2h  | 4.56E-06  | 5.47E-07 | 3.22E-07 | 1.63E-06 |
| 6h  | 1.96E-07  | 6.43E-07 | 3.60E-07 | 4.19E-07 |
| 12h | 7.57E-07  | 1.47E-07 | 2.93E-06 | 7.18E-07 |
| 24h | 2.36E-06  | 1.59E-06 | 5.78E-07 | 8.71E-07 |
| 36h | 3.57E-07  | 1.09E-06 | 9.84E-07 | 9.39E-07 |
| 48h | 7.22E-07  | 3.73E-07 | 1.78E-07 | 3.19E-07 |
| 72h | 2.14E-07  | 7.73E-08 | 1.42E-07 | 2.34E-07 |
|     | cgd6_2510 |          |          |          |
| 2h  | 2.07E-06  | 6.31E-09 | 1.29E-07 | 1.63E-07 |
| 6h  | 2.96E-07  | 2.87E-07 | 2.51E-07 | 4.49E-07 |
| 12h | 1.05E-07  | 2.99E-08 | 4.76E-07 | 1.62E-07 |
| 24h | 9.08E-08  | 2.13E-07 | 7.71E-08 | 3.45E-07 |
| 36h | 2.39E-07  | 1.84E-07 | 3.08E-07 | 2.83E-07 |
| 48h | 2.92E-07  | 1.31E-07 | 1.44E-07 | 2.26E-07 |
| 72h | 8.26E-08  | 1.44E-08 | 6.79E-08 | 4.97E-08 |
|     | cgd6_2520 |          |          |          |
| 2h  | 6.97E-06  | 2.04E-08 | 2.50E-07 | 9.12E-07 |
| 6h  | 2.51E-07  | 9.06E-08 | 5.21E-07 | 3.29E-07 |
| 12h | 1.35E-06  | 7.21E-08 | 9.80E-07 | 1.03E-06 |
| 24h | 2.86E-06  | 5.26E-07 | 5.25E-07 | 1.19E-06 |
| 36h | 1.53E-06  | 1.02E-06 | 1.37E-06 | 3.54E-06 |
| 48h | 1.03E-05  | 1.92E-07 | 4.03E-07 | 1.28E-06 |
| 72h | 1.69E-06  | 1.59E-07 | 8.93E-08 | 4.75E-07 |
|     | cgd6_2540 |          |          |          |
| 2h  | 5.67E-07  | 4.04E-07 | 5.57E-07 | 8.23E-07 |
| 6h  | 3.77E-07  | 2.52E-07 | 1.44E-07 | 2.04E-07 |
| 12h | 6.82E-07  | 7.13E-07 | 2.53E-06 | 6.13E-07 |
| 24h | 1.86E-06  | 3.42E-07 | 1.22E-07 | 2.12E-07 |

|     |           |          |          |          |
|-----|-----------|----------|----------|----------|
| 36h | 2.16E-07  | 3.43E-07 | 3.39E-07 | 3.72E-07 |
| 48h | 2.93E-07  | 4.99E-08 | 1.45E-07 | 1.14E-07 |
| 72h | 9.59E-08  | 8.75E-08 | 5.15E-08 | 1.93E-07 |
|     | cgd6_2550 |          |          |          |
| 2h  | 1.61E-04  | 7.00E-06 | 4.58E-05 | 1.17E-04 |
| 6h  | 9.16E-05  | 5.29E-06 | 2.72E-05 | 8.34E-05 |
| 12h | 1.99E-05  | 3.75E-06 | 5.10E-05 | 5.64E-05 |
| 24h | 6.01E-04  | 3.22E-06 | 3.89E-05 | 9.14E-05 |
| 36h | 1.54E-04  | 7.51E-06 | 2.90E-05 | 6.48E-05 |
| 48h | 2.04E-04  | 1.85E-06 | 2.74E-05 | 6.37E-05 |
| 72h | 4.79E-05  | 1.02E-06 | 4.95E-06 | 3.04E-05 |
|     | cgd6_2560 |          |          |          |
| 2h  | 1.31E-06  | 6.91E-07 | 1.77E-06 | 3.40E-06 |
| 6h  | 3.19E-06  | 1.69E-06 | 1.29E-05 | 8.96E-06 |
| 12h | 2.86E-06  | 8.11E-08 | 2.73E-06 | 1.08E-06 |
| 24h | 2.38E-06  | 8.03E-07 | 7.78E-06 | 5.52E-06 |
| 36h | 2.46E-06  | 1.43E-06 | 2.36E-06 | 0.00E+00 |
| 48h | 1.95E-06  | 4.21E-07 | 2.68E-06 | 3.72E-06 |
| 72h | 5.58E-07  | 7.23E-08 | 1.39E-07 | 1.62E-06 |
|     | cgd6_2570 |          |          |          |
| 2h  | 2.05E-06  | 1.13E-06 | 6.16E-07 | 3.21E-06 |
| 6h  | 4.18E-05  | 8.25E-08 | 8.23E-07 | 4.34E-07 |
| 12h | 1.08E-06  | 7.38E-07 | 6.78E-07 | 8.30E-07 |
| 24h | 5.68E-07  | 2.07E-07 | 6.67E-07 | 6.02E-07 |
| 36h | 8.28E-07  | 7.21E-07 | 7.91E-07 | 3.20E-06 |
| 48h | 1.37E-06  | 2.51E-07 | 1.19E-06 | 1.97E-06 |
| 72h | 3.01E-06  | 3.88E-07 | 1.90E-06 | 3.21E-06 |
|     | cgd6_2580 |          |          |          |
| 2h  | 7.54E-08  | 4.43E-08 | 1.18E-07 | 3.62E-08 |
| 6h  | 2.83E-07  | 4.38E-07 | 3.91E-06 | 1.06E-06 |
| 12h | 2.95E-07  | 2.52E-07 | 3.83E-07 | 2.65E-07 |
| 24h | 3.28E-07  | 2.45E-07 | 1.91E-06 | 1.31E-06 |
| 36h | 1.80E-06  | 9.51E-07 | 5.30E-07 | 2.39E-06 |
| 48h | 6.53E-07  | 3.21E-07 | 6.91E-07 | 1.32E-06 |
| 72h | 2.41E-07  | 1.10E-07 | 7.39E-08 | 4.52E-07 |
|     | cgd6_2590 |          |          |          |
| 2h  | 1.65E-03  | 5.54E-05 | 8.53E-05 | 7.12E-04 |
| 6h  | 5.10E-04  | 3.35E-05 | 2.46E-04 | 2.32E-04 |
| 12h | 6.50E-04  | 1.09E-05 | 1.29E-04 | 1.43E-04 |
| 24h | 8.80E-04  | 1.62E-05 | 7.82E-05 | 2.50E-04 |
| 36h | 2.11E-04  | 4.15E-05 | 8.78E-05 | 2.30E-04 |
| 48h | 1.35E-04  | 2.30E-05 | 8.32E-05 | 2.73E-04 |
| 72h | 7.25E-05  | 7.52E-06 | 5.16E-05 | 1.92E-04 |
|     | cgd6_2610 |          |          |          |
| 2h  | 3.21E-07  | 7.37E-08 | 3.41E-08 | 6.41E-07 |
| 6h  | 5.54E-07  | 8.44E-08 | 4.83E-07 | 2.44E-07 |
| 12h | 7.07E-08  | 1.45E-08 | 1.34E-07 | 2.92E-07 |
| 24h | 3.26E-07  | 1.11E-07 | 4.06E-07 | 8.37E-07 |
| 36h | 1.25E-06  | 5.38E-07 | 3.19E-07 | 1.80E-06 |
| 48h | 8.43E-06  | 6.02E-07 | 1.08E-06 | 3.89E-06 |
| 72h | 3.60E-06  | 2.32E-07 | 4.00E-07 | 2.37E-06 |
|     | cgd6_2620 |          |          |          |
| 2h  | 4.98E-06  | 4.85E-06 | 3.53E-06 | 7.82E-06 |

|     |           |          |          |          |
|-----|-----------|----------|----------|----------|
| 6h  | 5.47E-06  | 7.42E-06 | 3.21E-05 | 5.75E-06 |
| 12h | 4.42E-05  | 7.46E-05 | 1.79E-05 | 1.56E-05 |
| 24h | 9.03E-06  | 1.74E-05 | 6.72E-06 | 8.03E-06 |
| 36h | 1.00E-05  | 3.03E-05 | 6.67E-06 | 9.18E-06 |
| 48h | 2.96E-06  | 5.17E-06 | 2.01E-06 | 8.28E-06 |
| 72h | 2.33E-06  | 2.28E-06 | 1.17E-06 | 1.45E-06 |
|     | cgd6_2640 |          |          |          |
| 2h  | 1.29E-06  | 1.99E-06 | 1.41E-06 | 1.40E-06 |
| 6h  | 2.07E-07  | 7.18E-06 | 6.00E-08 | 1.43E-06 |
| 12h | 1.18E-06  | 5.11E-06 | 2.90E-06 | 6.76E-06 |
| 24h | 1.51E-05  | 4.58E-06 | 8.92E-07 | 3.51E-06 |
| 36h | 4.87E-06  | 4.39E-06 | 4.20E-06 | 9.05E-06 |
| 48h | 6.81E-06  | 6.58E-06 | 1.50E-06 | 4.39E-06 |
| 72h | 6.42E-07  | 1.09E-05 | 7.34E-07 | 2.20E-06 |
|     | cgd6_2660 |          |          |          |
| 2h  | 1.36E-07  | 1.18E-07 | 2.33E-08 | 2.81E-07 |
| 6h  | 4.42E-07  | 7.70E-07 | 1.22E-06 | 1.22E-06 |
| 12h | 1.35E-07  | 9.78E-08 | 1.95E-07 | 2.81E-07 |
| 24h | 2.75E-07  | 2.92E-07 | 4.86E-07 | 7.02E-07 |
| 36h | 5.31E-07  | 4.95E-07 | 5.88E-07 | 4.39E-07 |
| 48h | 9.14E-07  | 2.39E-07 | 1.87E-07 | 2.62E-07 |
| 72h | 1.76E-07  | 3.68E-08 | 4.37E-07 | 7.37E-08 |
|     | cgd6_2670 |          |          |          |
| 2h  | 0.00E+00  | 0.00E+00 | 0.00E+00 | 0.00E+00 |
| 6h  | 0.00E+00  | 0.00E+00 | 0.00E+00 | 0.00E+00 |
| 12h | 0.00E+00  | 0.00E+00 | 0.00E+00 | 3.42E-09 |
| 24h | 6.28E-09  | 1.47E-08 | 2.03E-08 | 4.62E-09 |
| 36h | 4.57E-07  | 5.49E-07 | 3.47E-07 | 1.23E-07 |
| 48h | 2.31E-05  | 4.11E-06 | 1.20E-06 | 1.54E-06 |
| 72h | 1.05E-06  | 3.99E-07 | 9.65E-07 | 9.24E-07 |
|     | cgd6_2680 |          |          |          |
| 2h  | 0.00E+00  | 0.00E+00 | 0.00E+00 | 0.00E+00 |
| 6h  | 1.00E-08  | 3.93E-08 | 2.42E-09 | 0.00E+00 |
| 12h | 9.72E-09  | 0.00E+00 | 1.43E-07 | 1.37E-08 |
| 24h | 8.09E-08  | 5.45E-08 | 6.24E-08 | 6.21E-08 |
| 36h | 1.26E-07  | 1.18E-07 | 2.17E-07 | 1.73E-07 |
| 48h | 5.41E-06  | 3.81E-06 | 1.54E-06 | 1.46E-06 |
| 72h | 1.21E-06  | 1.31E-07 | 3.76E-07 | 5.32E-07 |
|     | cgd6_2690 |          |          |          |
| 2h  | 3.17E-06  | 1.27E-06 | 1.37E-06 | 8.34E-07 |
| 6h  | 2.31E-06  | 6.13E-06 | 3.86E-06 | 4.03E-06 |
| 12h | 8.17E-07  | 1.25E-06 | 1.59E-06 | 1.45E-06 |
| 24h | 1.68E-06  | 1.19E-06 | 2.23E-06 | 2.35E-06 |
| 36h | 2.97E-06  | 3.65E-06 | 3.30E-06 | 5.35E-06 |
| 48h | 3.28E-06  | 1.45E-06 | 1.06E-06 | 8.51E-07 |
| 72h | 1.03E-06  | 7.82E-07 | 4.01E-07 | 1.00E-06 |
|     | cgd6_2700 |          |          |          |
| 2h  | 0.00E+00  | 0.00E+00 | 1.69E-04 | 1.63E-04 |
| 6h  | 0.00E+00  | 7.67E-05 | 0.00E+00 | 7.02E-06 |
| 12h | 7.32E-04  | 1.87E-03 | 1.57E-03 | 1.82E-02 |
| 24h | 2.29E-04  | 1.51E-04 | 1.44E-03 | 1.99E-03 |
| 36h | 6.73E-04  | 7.15E-04 | 2.92E-03 | 4.64E-03 |
| 48h | 3.64E-04  | 6.29E-04 | 3.09E-03 | 5.37E-03 |

|     |           |          |          |          |
|-----|-----------|----------|----------|----------|
| 72h | 1.11E-03  | 2.67E-04 | 3.80E-03 | 4.53E-03 |
|     | cgd6_2710 |          |          |          |
| 2h  | 3.16E-08  | 0.00E+00 | 0.00E+00 | 0.00E+00 |
| 6h  | 0.00E+00  | 0.00E+00 | 0.00E+00 | 5.00E-09 |
| 12h | 4.80E-08  | 1.05E-07 | 1.48E-07 | 5.05E-07 |
| 24h | 8.77E-08  | 8.14E-08 | 2.48E-07 | 7.83E-08 |
| 36h | 5.64E-07  | 3.11E-07 | 7.41E-07 | 5.90E-07 |
| 48h | 1.96E-06  | 4.89E-07 | 9.87E-07 | 7.89E-07 |
| 72h | 1.75E-06  | 1.19E-07 | 4.36E-07 | 5.63E-07 |
|     | cgd6_2720 |          |          |          |
| 2h  | 4.64E-05  | 2.62E-05 | 2.78E-05 | 6.46E-05 |
| 6h  | 6.34E-06  | 5.82E-06 | 1.21E-05 | 1.21E-05 |
| 12h | 2.40E-05  | 1.42E-05 | 2.78E-05 | 4.84E-05 |
| 24h | 2.93E-05  | 3.26E-05 | 2.54E-05 | 1.70E-05 |
| 36h | 1.03E-05  | 1.28E-05 | 9.70E-06 | 7.57E-06 |
| 48h | 4.91E-05  | 6.69E-06 | 6.57E-06 | 8.52E-06 |
| 72h | 3.32E-06  | 7.49E-07 | 7.87E-07 | 9.86E-07 |
|     | cgd6_2740 |          |          |          |
| 2h  | 6.24E-05  | 3.86E-05 | 2.68E-06 | 1.07E-05 |
| 6h  | 2.40E-04  | 3.01E-04 | 6.38E-04 | 5.06E-04 |
| 12h | 9.79E-06  | 2.83E-05 | 2.43E-05 | 3.83E-05 |
| 24h | 1.93E-04  | 5.04E-05 | 1.53E-04 | 1.02E-04 |
| 36h | 5.56E-05  | 6.29E-05 | 1.84E-05 | 2.55E-05 |
| 48h | 3.40E-05  | 1.97E-05 | 1.04E-05 | 1.23E-05 |
| 72h | 6.02E-05  | 1.89E-06 | 1.57E-06 | 3.28E-06 |
|     | cgd6_2750 |          |          |          |
| 2h  | 1.81E-08  | 1.38E-08 | 2.34E-08 | 4.56E-08 |
| 6h  | 2.56E-08  | 2.30E-09 | 0.00E+00 | 3.91E-09 |
| 12h | 2.60E-08  | 7.42E-09 | 1.78E-08 | 1.01E-08 |
| 24h | 2.28E-08  | 2.27E-08 | 6.73E-08 | 4.39E-08 |
| 36h | 3.14E-08  | 1.03E-07 | 2.66E-08 | 1.98E-08 |
| 48h | 2.91E-07  | 1.60E-07 | 8.27E-08 | 8.11E-08 |
| 72h | 1.22E-07  | 4.31E-08 | 3.01E-08 | 5.08E-08 |
|     | cgd6_2760 |          |          |          |
| 2h  | 2.27E-04  | 6.95E-04 | 6.84E-05 | 2.46E-04 |
| 6h  | 2.35E-05  | 6.97E-05 | 2.43E-05 | 5.11E-05 |
| 12h | 2.75E-04  | 4.87E-04 | 7.50E-05 | 1.35E-04 |
| 24h | 1.17E-04  | 2.37E-04 | 4.97E-05 | 4.38E-05 |
| 36h | 1.16E-04  | 3.69E-04 | 3.02E-05 | 5.19E-05 |
| 48h | 4.84E-04  | 1.78E-04 | 2.24E-05 | 3.85E-05 |
| 72h | 1.50E-04  | 3.11E-05 | 1.38E-05 | 2.81E-05 |
|     | cgd6_2770 |          |          |          |
| 2h  | 2.16E-06  | 9.14E-06 | 8.34E-07 | 2.52E-06 |
| 6h  | 2.02E-07  | 8.83E-08 | 1.29E-06 | 4.12E-07 |
| 12h | 4.91E-07  | 9.23E-07 | 4.40E-07 | 7.75E-07 |
| 24h | 4.26E-07  | 4.27E-07 | 8.69E-07 | 8.02E-07 |
| 36h | 6.63E-07  | 4.53E-07 | 4.91E-07 | 5.93E-07 |
| 48h | 6.36E-07  | 2.62E-07 | 3.80E-07 | 3.24E-07 |
| 72h | 7.13E-07  | 7.33E-07 | 5.08E-07 | 9.78E-07 |
|     | cgd6_2780 |          |          |          |
| 2h  | 9.03E-08  | 0.00E+00 | 2.49E-08 | 1.55E-08 |
| 6h  | 1.94E-07  | 1.13E-06 | 2.72E-07 | 3.36E-07 |
| 12h | 3.33E-07  | 8.72E-07 | 1.11E-07 | 5.05E-07 |

|     |           |          |          |          |
|-----|-----------|----------|----------|----------|
| 24h | 1.83E-07  | 6.06E-07 | 1.22E-07 | 9.98E-07 |
| 36h | 1.14E-06  | 1.23E-06 | 5.49E-07 | 4.77E-07 |
| 48h | 2.54E-07  | 4.13E-07 | 2.94E-07 | 8.23E-07 |
| 72h | 3.38E-07  | 1.17E-07 | 2.03E-07 | 3.31E-07 |
|     | cgd6_2790 |          |          |          |
| 2h  | 1.14E-07  | 5.88E-08 | 2.63E-09 | 7.11E-08 |
| 6h  | 0.00E+00  | 1.41E-08 | 9.66E-10 | 0.00E+00 |
| 12h | 1.96E-05  | 7.11E-06 | 4.90E-06 | 3.20E-06 |
| 24h | 1.92E-06  | 3.95E-07 | 2.95E-06 | 6.50E-07 |
| 36h | 9.03E-07  | 4.08E-06 | 4.52E-07 | 2.93E-06 |
| 48h | 7.42E-06  | 4.23E-06 | 3.72E-06 | 6.43E-06 |
| 72h | 1.16E-06  | 2.46E-07 | 2.69E-07 | 4.04E-07 |
|     | cgd6_2800 |          |          |          |
| 2h  | 1.06E-04  | 0.00E+00 | 4.33E-06 | 1.54E-05 |
| 6h  | 5.49E-06  | 2.81E-05 | 8.01E-07 | 7.05E-06 |
| 12h | 7.56E-06  | 2.98E-05 | 8.95E-06 | 6.98E-06 |
| 24h | 7.94E-06  | 1.33E-04 | 1.34E-05 | 2.49E-05 |
| 36h | 8.56E-05  | 1.55E-04 | 5.02E-05 | 9.24E-06 |
| 48h | 2.16E-05  | 5.20E-05 | 4.99E-05 | 3.52E-05 |
| 72h | 8.69E-05  | 1.71E-04 | 5.18E-05 | 1.49E-05 |
|     | cgd6_2810 |          |          |          |
| 2h  | 1.04E-04  | 2.86E-03 | 4.35E-04 | 3.13E-04 |
| 6h  | 3.27E-04  | 5.05E-04 | 1.46E-04 | 1.76E-04 |
| 12h | 2.25E-04  | 9.28E-04 | 4.97E-04 | 7.45E-05 |
| 24h | 7.87E-05  | 1.15E-04 | 1.31E-04 | 1.77E-04 |
| 36h | 1.87E-05  | 5.94E-04 | 1.19E-04 | 8.76E-05 |
| 48h | 9.42E-07  | 1.76E-04 | 6.93E-05 | 4.46E-05 |
| 72h | 6.48E-05  | 1.41E-04 | 2.44E-05 | 2.04E-05 |
|     | cgd6_2820 |          |          |          |
| 2h  | 1.22E-06  | 2.14E-07 | 3.89E-07 | 7.93E-07 |
| 6h  | 1.06E-06  | 2.33E-06 | 4.61E-07 | 1.21E-06 |
| 12h | 7.37E-07  | 1.34E-06 | 1.16E-07 | 5.32E-07 |
| 24h | 8.06E-07  | 1.06E-06 | 3.42E-07 | 6.87E-07 |
| 36h | 8.17E-08  | 4.07E-07 | 1.03E-07 | 1.94E-07 |
| 48h | 7.77E-08  | 3.41E-08 | 8.16E-08 | 9.69E-08 |
| 72h | 3.90E-08  | 5.48E-08 | 3.17E-08 | 2.07E-07 |
|     | cgd6_2850 |          |          |          |
| 2h  | 3.51E-07  | 6.66E-06 | 9.75E-07 | 5.33E-07 |
| 6h  | 9.60E-05  | 6.58E-04 | 1.12E-04 | 1.86E-04 |
| 12h | 1.28E-03  | 2.18E-05 | 3.23E-05 | 1.72E-05 |
| 24h | 5.61E-05  | 2.09E-04 | 6.76E-05 | 1.74E-04 |
| 36h | 7.18E-05  | 2.07E-04 | 9.85E-05 | 8.15E-05 |
| 48h | 2.49E-04  | 1.28E-04 | 7.34E-05 | 8.02E-05 |
| 72h | 2.74E-04  | 5.98E-05 | 3.95E-05 | 3.80E-05 |
|     | cgd6_2860 |          |          |          |
| 2h  | 0.00E+00  | 0.00E+00 | 0.00E+00 | 0.00E+00 |
| 6h  | 8.99E-08  | 0.00E+00 | 7.43E-08 | 0.00E+00 |
| 12h | 3.96E-05  | 4.11E-06 | 3.84E-06 | 1.98E-06 |
| 24h | 2.07E-06  | 6.06E-06 | 2.13E-06 | 1.73E-06 |
| 36h | 4.55E-06  | 1.16E-05 | 4.79E-06 | 3.72E-06 |
| 48h | 2.37E-05  | 3.01E-05 | 1.96E-05 | 3.14E-05 |
| 72h | 1.03E-04  | 3.79E-05 | 2.82E-05 | 2.45E-05 |
|     | cgd6_2870 |          |          |          |

|     |           |          |          |          |
|-----|-----------|----------|----------|----------|
| 2h  | 4.62E-07  | 4.25E-07 | 1.77E-07 | 5.73E-07 |
| 6h  | 3.44E-07  | 1.04E-06 | 1.20E-07 | 1.05E-06 |
| 12h | 3.23E-06  | 4.37E-06 | 1.73E-06 | 5.76E-07 |
| 24h | 5.60E-07  | 2.53E-06 | 7.17E-07 | 1.78E-06 |
| 36h | 6.67E-07  | 1.30E-06 | 1.73E-06 | 6.86E-07 |
| 48h | 4.42E-07  | 7.13E-07 | 9.95E-07 | 1.18E-06 |
| 72h | 1.47E-06  | 5.39E-07 | 9.07E-07 | 4.65E-07 |
|     | cgd6_2880 |          |          |          |
| 2h  | 2.36E-06  | 9.24E-07 | 4.55E-06 | 2.98E-04 |
| 6h  | 2.52E-06  | 4.05E-07 | 2.74E-06 | 1.61E-04 |
| 12h | 4.30E-05  | 1.12E-06 | 5.80E-06 | 1.35E-04 |
| 24h | 2.38E-05  | 9.45E-06 | 1.04E-05 | 1.18E-04 |
| 36h | 2.49E-05  | 2.89E-05 | 8.06E-06 | 1.04E-04 |
| 48h | 7.88E-06  | 5.99E-06 | 6.08E-06 | 2.85E-04 |
| 72h | 2.68E-06  | 3.21E-06 | 2.53E-06 | 3.89E-04 |
|     | cgd6_2890 |          |          |          |
| 2h  | 4.53E-08  | 0.00E+00 | 0.00E+00 | 0.00E+00 |
| 6h  | 0.00E+00  | 0.00E+00 | 0.00E+00 | 0.00E+00 |
| 12h | 1.15E-08  | 0.00E+00 | 5.60E-09 | 3.39E-07 |
| 24h | 1.06E-08  | 1.38E-08 | 3.72E-08 | 7.49E-08 |
| 36h | 4.37E-08  | 1.23E-07 | 6.73E-08 | 8.88E-07 |
| 48h | 9.05E-09  | 6.83E-08 | 2.51E-08 | 1.71E-06 |
| 72h | 1.12E-07  | 3.15E-08 | 3.78E-08 | 3.68E-07 |
|     | cgd6_2930 |          |          |          |
| 2h  | 0.00E+00  | 0.00E+00 | 0.00E+00 | 0.00E+00 |
| 6h  | 1.04E-06  | 4.81E-06 | 2.97E-07 | 3.73E-06 |
| 12h | 2.23E-06  | 2.74E-06 | 5.64E-07 | 1.24E-06 |
| 24h | 1.95E-06  | 6.29E-06 | 1.06E-06 | 6.90E-06 |
| 36h | 3.00E-06  | 9.02E-06 | 8.95E-06 | 8.01E-06 |
| 48h | 2.62E-05  | 9.16E-06 | 1.22E-05 | 2.68E-05 |
| 72h | 1.39E-05  | 7.23E-06 | 6.29E-06 | 9.11E-06 |
|     | cgd6_2940 |          |          |          |
| 2h  | 0.00E+00  | 0.00E+00 | 0.00E+00 | 0.00E+00 |
| 6h  | 1.06E-07  | 3.45E-06 | 2.09E-06 | 4.15E-07 |
| 12h | 3.08E-03  | 1.16E-04 | 9.14E-07 | 2.38E-05 |
| 24h | 1.41E-04  | 1.33E-03 | 1.73E-05 | 8.88E-05 |
| 36h | 3.83E-04  | 9.59E-04 | 6.26E-04 | 2.31E-04 |
| 48h | 2.49E-04  | 5.64E-03 | 2.13E-04 | 3.02E-04 |
| 72h | 9.82E-04  | 1.35E-03 | 2.20E-04 | 3.21E-04 |
|     | cgd6_3920 |          |          |          |
| 2h  | 5.62E-06  | 2.24E-06 | 1.64E-06 | 1.91E-06 |
| 6h  | 1.86E-07  | 6.64E-08 | 1.40E-07 | 7.51E-08 |
| 12h | 9.39E-06  | 8.05E-06 | 1.86E-06 | 1.94E-05 |
| 24h | 1.49E-05  | 1.22E-06 | 2.03E-06 | 5.88E-06 |
| 36h | 8.70E-07  | 9.09E-07 | 5.20E-07 | 1.45E-06 |
| 48h | 2.94E-06  | 9.00E-07 | 3.53E-07 | 5.58E-07 |
| 72h | 3.14E-07  | 2.51E-07 | 9.27E-08 | 3.05E-07 |
|     | cgd6_3950 |          |          |          |
| 2h  | 0.00E+00  | 0.00E+00 | 1.63E-09 | 0.00E+00 |
| 6h  | 9.93E-08  | 1.87E-07 | 2.45E-07 | 3.85E-07 |
| 12h | 7.71E-08  | 2.39E-09 | 1.60E-09 | 7.61E-09 |
| 24h | 1.36E-07  | 6.41E-07 | 7.17E-08 | 7.85E-08 |
| 36h | 6.63E-08  | 8.87E-08 | 4.22E-08 | 4.39E-07 |



|     |           |          |          |          |
|-----|-----------|----------|----------|----------|
| 48h | 2.67E-07  | 8.95E-08 | 3.37E-08 | 2.07E-07 |
| 72h | 2.89E-08  | 1.10E-08 | 5.97E-08 | 2.82E-08 |
|     | cgd6_3960 |          |          |          |
| 2h  | 5.65E-07  | 1.47E-07 | 3.51E-07 | 4.75E-07 |
| 6h  | 6.99E-07  | 1.58E-07 | 9.58E-07 | 6.05E-07 |
| 12h | 5.22E-07  | 1.62E-06 | 1.92E-07 | 4.04E-07 |
| 24h | 1.46E-06  | 4.93E-07 | 2.51E-07 | 1.08E-06 |
| 36h | 1.71E-07  | 3.02E-07 | 2.85E-07 | 3.49E-07 |
| 48h | 4.22E-07  | 1.82E-07 | 8.47E-08 | 2.45E-07 |
| 72h | 4.44E-07  | 2.62E-07 | 3.36E-07 | 3.08E-07 |
|     | cgd6_3990 |          |          |          |
| 2h  | 1.19E-04  | 3.36E-05 | 1.60E-04 | 2.15E-04 |
| 6h  | 2.55E-03  | 1.07E-03 | 1.25E-03 | 2.47E-03 |
| 12h | 1.42E-04  | 4.05E-04 | 1.15E-04 | 1.61E-04 |
| 24h | 4.92E-04  | 8.05E-04 | 6.79E-04 | 5.11E-04 |
| 36h | 2.11E-04  | 1.58E-04 | 2.00E-04 | 4.23E-04 |
| 48h | 8.07E-05  | 8.27E-05 | 6.17E-05 | 8.15E-05 |
| 72h | 1.81E-05  | 7.21E-06 | 8.68E-06 | 1.69E-05 |
|     | cgd6_4000 |          |          |          |
| 2h  | 0.00E+00  | 0.00E+00 | 0.00E+00 | 0.00E+00 |
| 6h  | 0.00E+00  | 0.00E+00 | 0.00E+00 | 0.00E+00 |
| 12h | 2.63E-06  | 1.39E-06 | 7.85E-08 | 1.63E-06 |
| 24h | 2.48E-07  | 1.76E-08 | 4.17E-09 | 2.38E-07 |
| 36h | 1.07E-07  | 1.91E-07 | 1.18E-07 | 1.93E-07 |
| 48h | 4.75E-08  | 5.82E-08 | 1.88E-08 | 7.57E-08 |
| 72h | 1.09E-07  | 9.68E-08 | 6.42E-08 | 1.23E-07 |
|     | cgd6_4020 |          |          |          |
| 2h  | 0.00E+00  | 0.00E+00 | 0.00E+00 | 0.00E+00 |
| 6h  | 0.00E+00  | 0.00E+00 | 0.00E+00 | 0.00E+00 |
| 12h | 1.25E-06  | 6.69E-05 | 6.95E-07 | 8.58E-06 |
| 24h | 2.87E-06  | 1.33E-05 | 3.41E-07 | 9.47E-06 |
| 36h | 2.99E-05  | 4.10E-05 | 3.14E-06 | 6.01E-05 |
| 48h | 4.12E-04  | 4.68E-04 | 8.07E-06 | 1.92E-04 |
| 72h | 1.28E-03  | 6.32E-04 | 1.18E-04 | 2.95E-03 |
|     | cgd6_4030 |          |          |          |
| 2h  | 0.00E+00  | 0.00E+00 | 0.00E+00 | 0.00E+00 |
| 6h  | 3.50E-07  | 0.00E+00 | 2.79E-08 | 1.08E-05 |
| 12h | 5.56E-03  | 1.19E-02 | 1.24E-04 | 7.30E-03 |
| 24h | 6.59E-04  | 1.63E-03 | 2.39E-05 | 1.45E-03 |
| 36h | 2.80E-04  | 4.32E-03 | 1.25E-04 | 6.49E-04 |
| 48h | 6.00E-04  | 8.12E-04 | 4.94E-05 | 5.93E-04 |
| 72h | 6.03E-04  | 4.04E-03 | 1.01E-04 | 5.47E-04 |
|     | cgd6_4040 |          |          |          |
| 2h  | 8.61E-09  | 0.00E+00 | 1.04E-08 | 3.72E-09 |
| 6h  | 1.06E-06  | 2.96E-07 | 2.80E-07 | 4.90E-07 |
| 12h | 1.77E-07  | 1.23E-07 | 3.88E-08 | 1.11E-07 |
| 24h | 1.73E-07  | 7.24E-07 | 3.28E-07 | 4.21E-07 |
| 36h | 7.36E-07  | 2.59E-07 | 3.84E-07 | 8.61E-07 |
| 48h | 5.33E-07  | 5.41E-07 | 2.82E-07 | 4.58E-07 |
| 72h | 1.95E-06  | 8.09E-07 | 8.76E-07 | 8.85E-07 |
|     | cgd6_4050 |          |          |          |
| 2h  | 1.41E-08  | 0.00E+00 | 0.00E+00 | 1.30E-08 |
| 6h  | 6.20E-07  | 4.69E-07 | 2.06E-07 | 7.38E-07 |

|     |           |          |          |          |
|-----|-----------|----------|----------|----------|
| 12h | 1.87E-07  | 2.08E-07 | 5.20E-08 | 6.64E-07 |
| 24h | 4.66E-07  | 5.92E-07 | 3.29E-07 | 4.59E-07 |
| 36h | 1.10E-06  | 5.16E-07 | 4.93E-07 | 6.90E-07 |
| 48h | 1.58E-06  | 1.26E-06 | 7.51E-07 | 7.16E-07 |
| 72h | 5.12E-06  | 2.26E-06 | 2.79E-06 | 2.42E-06 |
|     | cgd6_4060 |          |          |          |
| 2h  | 1.99E-08  | 1.96E-08 | 1.21E-08 | 4.41E-09 |
| 6h  | 2.69E-08  | 2.47E-08 | 1.91E-09 | 4.41E-08 |
| 12h | 5.18E-08  | 7.88E-09 | 3.63E-09 | 3.65E-08 |
| 24h | 3.34E-08  | 9.25E-08 | 4.37E-08 | 6.47E-08 |
| 36h | 1.45E-07  | 7.57E-08 | 1.56E-08 | 8.11E-08 |
| 48h | 6.87E-07  | 7.35E-07 | 1.52E-07 | 4.10E-07 |
| 72h | 1.34E-06  | 1.32E-06 | 2.72E-07 | 5.18E-07 |
|     | cgd6_4070 |          |          |          |
| 2h  | 1.10E-03  | 2.13E-04 | 2.17E-03 | 3.86E-04 |
| 6h  | 9.12E-04  | 2.13E-04 | 6.53E-04 | 5.19E-04 |
| 12h | 2.47E-04  | 6.05E-05 | 1.29E-03 | 8.75E-05 |
| 24h | 4.59E-04  | 9.63E-05 | 4.18E-03 | 3.55E-04 |
| 36h | 2.93E-04  | 5.96E-05 | 1.47E-03 | 1.69E-04 |
| 48h | 6.90E-04  | 1.97E-04 | 4.22E-03 | 8.67E-04 |
| 72h | 6.37E-04  | 8.76E-05 | 4.42E-04 | 2.60E-04 |
|     | cgd6_4080 |          |          |          |
| 2h  | 2.70E-08  | 0.00E+00 | 1.46E-06 | 2.50E-08 |
| 6h  | 6.54E-08  | 1.17E-07 | 8.39E-08 | 1.39E-06 |
| 12h | 1.12E-06  | 5.93E-06 | 1.60E-07 | 1.22E-06 |
| 24h | 3.33E-07  | 4.28E-07 | 3.50E-07 | 2.11E-07 |
| 36h | 9.83E-07  | 5.12E-07 | 6.73E-07 | 1.16E-06 |
| 48h | 2.16E-06  | 1.71E-06 | 1.96E-07 | 1.14E-06 |
| 72h | 1.80E-06  | 2.15E-05 | 9.68E-07 | 1.04E-06 |
|     | cgd6_2950 |          |          |          |
| 2h  | 2.04E-06  | 1.63E-06 | 5.71E-07 | 6.45E-07 |
| 6h  | 4.65E-07  | 4.27E-06 | 7.91E-07 | 1.05E-06 |
| 12h | 1.18E-06  | 8.69E-06 | 1.04E-06 | 8.04E-07 |
| 24h | 1.14E-06  | 1.35E-05 | 9.52E-06 | 2.71E-06 |
| 36h | 5.22E-06  | 1.08E-05 | 1.24E-05 | 5.03E-06 |
| 48h | 3.36E-06  | 9.83E-06 | 6.07E-06 | 4.06E-06 |
| 72h | 1.86E-06  | 1.04E-06 | 2.65E-06 | 2.46E-06 |
|     | cgd6_2960 |          |          |          |
| 2h  | 4.71E-06  | 7.82E-06 | 2.74E-06 | 2.25E-06 |
| 6h  | 5.61E-06  | 1.51E-05 | 9.07E-06 | 6.39E-06 |
| 12h | 1.92E-07  | 3.95E-06 | 1.29E-06 | 3.21E-07 |
| 24h | 2.27E-06  | 4.84E-06 | 4.68E-06 | 5.08E-06 |
| 36h | 1.84E-06  | 3.50E-06 | 2.63E-06 | 1.78E-06 |
| 48h | 9.85E-07  | 4.42E-06 | 2.33E-06 | 9.13E-07 |
| 72h | 4.30E-07  | 2.99E-07 | 5.70E-07 | 3.81E-07 |
|     | cgd6_2970 |          |          |          |
| 2h  | 6.18E-05  | 1.13E-04 | 2.07E-05 | 5.95E-05 |
| 6h  | 5.67E-05  | 1.72E-04 | 1.15E-05 | 1.03E-04 |
| 12h | 5.57E-07  | 2.71E-05 | 1.37E-06 | 2.80E-06 |
| 24h | 5.50E-06  | 4.78E-05 | 5.35E-06 | 1.97E-05 |
| 36h | 4.90E-06  | 1.06E-05 | 3.14E-06 | 1.20E-05 |
| 48h | 1.13E-05  | 2.09E-05 | 2.57E-06 | 7.25E-06 |
| 72h | 3.67E-06  | 8.85E-06 | 2.06E-06 | 2.75E-06 |

|     |           |          |          |          |
|-----|-----------|----------|----------|----------|
|     | cgd6_2980 |          |          |          |
| 2h  | 2.11E-03  | 1.87E-03 | 1.67E-04 | 2.86E-03 |
| 6h  | 1.32E-03  | 4.63E-03 | 2.13E-04 | 7.03E-03 |
| 12h | 4.95E-05  | 2.89E-04 | 9.93E-06 | 7.43E-05 |
| 24h | 2.55E-04  | 2.24E-03 | 1.09E-04 | 1.04E-03 |
| 36h | 5.60E-04  | 6.45E-04 | 7.82E-05 | 8.73E-04 |
| 48h | 4.05E-04  | 4.51E-04 | 1.93E-05 | 7.29E-04 |
| 72h | 1.19E-04  | 3.20E-04 | 3.26E-05 | 2.73E-04 |
|     | cgd6_2990 |          |          |          |
| 2h  | 2.64E-06  | 1.23E-06 | 5.99E-07 | 1.30E-06 |
| 6h  | 3.23E-07  | 9.20E-08 | 5.64E-08 | 0.00E+00 |
| 12h | 1.36E-07  | 9.68E-07 | 9.25E-08 | 4.73E-08 |
| 24h | 2.81E-07  | 2.43E-07 | 4.17E-07 | 1.47E-07 |
| 36h | 9.02E-07  | 1.01E-06 | 1.07E-06 | 5.47E-07 |
| 48h | 1.38E-06  | 1.25E-06 | 6.15E-07 | 7.32E-07 |
| 72h | 1.17E-06  | 1.68E-06 | 8.90E-07 | 9.86E-07 |
|     | cgd6_3000 |          |          |          |
| 2h  | 3.02E-06  | 1.18E-06 | 6.16E-07 | 4.36E-07 |
| 6h  | 7.08E-08  | 3.31E-07 | 7.71E-08 | 1.30E-07 |
| 12h | 1.42E-10  | 1.32E-07 | 5.16E-08 | 2.38E-09 |
| 24h | 9.97E-08  | 1.42E-07 | 1.43E-07 | 7.37E-08 |
| 36h | 2.54E-07  | 4.39E-07 | 3.42E-07 | 2.51E-07 |
| 48h | 3.66E-07  | 3.27E-07 | 1.88E-07 | 2.07E-07 |
| 72h | 3.26E-07  | 4.06E-07 | 3.80E-07 | 4.79E-07 |
|     | cgd6_3010 |          |          |          |
| 2h  | 1.45E-04  | 9.83E-05 | 1.60E-04 | 6.65E-05 |
| 6h  | 9.45E-05  | 2.13E-04 | 1.27E-04 | 1.04E-04 |
| 12h | 1.55E-05  | 3.80E-04 | 4.69E-05 | 9.64E-06 |
| 24h | 9.59E-05  | 1.35E-04 | 2.74E-04 | 1.00E-04 |
| 36h | 5.96E-05  | 5.86E-05 | 2.67E-05 | 4.40E-05 |
| 48h | 1.92E-05  | 3.65E-05 | 4.15E-05 | 3.04E-05 |
| 72h | 1.70E-05  | 1.13E-05 | 8.48E-06 | 7.81E-06 |
|     | cgd6_3020 |          |          |          |
| 2h  | 0.00E+00  | 0.00E+00 | 6.50E-10 | 0.00E+00 |
| 6h  | 0.00E+00  | 0.00E+00 | 0.00E+00 | 0.00E+00 |
| 12h | 1.08E-07  | 7.76E-08 | 1.66E-07 | 1.28E-07 |
| 24h | 3.37E-08  | 6.22E-08 | 6.60E-08 | 2.51E-07 |
| 36h | 1.30E-07  | 1.79E-07 | 3.26E-07 | 9.01E-08 |
| 48h | 1.44E-07  | 9.19E-08 | 1.47E-07 | 2.56E-07 |
| 72h | 1.24E-07  | 1.10E-07 | 9.16E-08 | 1.21E-07 |
|     | cgd6_3030 |          |          |          |
| 2h  | 0.00E+00  | 0.00E+00 | 6.87E-09 | 0.00E+00 |
| 6h  | 1.04E-08  | 0.00E+00 | 0.00E+00 | 0.00E+00 |
| 12h | 5.10E-07  | 4.97E-06 | 5.00E-07 | 4.39E-06 |
| 24h | 6.99E-07  | 1.43E-05 | 2.02E-06 | 2.47E-05 |
| 36h | 3.89E-06  | 6.08E-06 | 2.65E-06 | 9.12E-06 |
| 48h | 1.74E-05  | 1.40E-05 | 4.16E-06 | 1.30E-05 |
| 72h | 3.49E-05  | 2.02E-05 | 3.70E-06 | 1.83E-05 |
|     | cgd6_3040 |          |          |          |
| 2h  | 3.78E-03  | 9.29E-04 | 1.42E-03 | 3.45E-04 |
| 6h  | 1.62E-04  | 1.80E-03 | 5.72E-03 | 2.64E-04 |
| 12h | 4.90E-04  | 1.38E-03 | 3.63E-04 | 7.29E-05 |
| 24h | 7.50E-05  | 3.56E-04 | 4.02E-03 | 8.75E-05 |

|     |           |          |          |          |
|-----|-----------|----------|----------|----------|
| 36h | 2.55E-04  | 1.08E-03 | 6.39E-04 | 1.15E-04 |
| 48h | 1.14E-04  | 3.58E-04 | 1.06E-03 | 5.31E-05 |
| 72h | 2.47E-04  | 3.19E-04 | 4.41E-04 | 1.48E-04 |
|     | cgd6_3050 |          |          |          |
| 2h  | 3.02E-05  | 3.12E-06 | 2.78E-06 | 1.20E-04 |
| 6h  | 3.27E-06  | 1.34E-05 | 5.23E-06 | 1.94E-05 |
| 12h | 1.12E-03  | 3.98E-03 | 1.65E-04 | 1.08E-03 |
| 24h | 1.58E-04  | 3.02E-04 | 2.11E-04 | 8.38E-04 |
| 36h | 6.25E-04  | 1.45E-03 | 4.19E-04 | 1.08E-03 |
| 48h | 4.22E-04  | 9.01E-04 | 4.76E-05 | 4.95E-04 |
| 72h | 3.67E-05  | 1.93E-05 | 6.03E-06 | 3.26E-05 |
|     | cgd6_3060 |          |          |          |
| 2h  | 0.00E+00  | 0.00E+00 | 0.00E+00 | 0.00E+00 |
| 6h  | 0.00E+00  | 0.00E+00 | 0.00E+00 | 0.00E+00 |
| 12h | 3.20E-09  | 1.50E-08 | 2.13E-09 | 0.00E+00 |
| 24h | 1.53E-08  | 2.14E-07 | 4.41E-08 | 1.88E-08 |
| 36h | 1.63E-06  | 7.20E-07 | 1.56E-07 | 2.50E-06 |
| 48h | 2.06E-05  | 7.77E-05 | 8.59E-07 | 4.21E-05 |
| 72h | 1.54E-06  | 8.27E-05 | 1.40E-07 | 3.54E-06 |
|     | cgd6_4090 |          |          |          |
| 2h  | 0.00E+00  | 0.00E+00 | 0.00E+00 | 0.00E+00 |
| 6h  | 0.00E+00  | 0.00E+00 | 0.00E+00 | 0.00E+00 |
| 12h | 1.31E-09  | 0.00E+00 | 8.03E-10 | 3.20E-10 |
| 24h | 1.02E-08  | 4.65E-09 | 5.78E-09 | 2.77E-09 |
| 36h | 1.78E-07  | 8.11E-08 | 1.69E-08 | 2.69E-08 |
| 48h | 4.75E-07  | 3.53E-07 | 2.84E-07 | 3.45E-07 |
| 72h | 8.84E-07  | 7.36E-07 | 9.61E-07 | 3.90E-07 |
|     | cgd6_4100 |          |          |          |
| 2h  | 5.77E-06  | 0.00E+00 | 4.43E-06 | 1.52E-07 |
| 6h  | 0.00E+00  | 0.00E+00 | 0.00E+00 | 4.52E-08 |
| 12h | 1.01E-05  | 1.59E-05 | 5.77E-05 | 5.95E-07 |
| 24h | 1.07E-04  | 6.34E-05 | 3.80E-05 | 3.77E-06 |
| 36h | 1.28E-04  | 1.46E-04 | 8.10E-05 | 4.81E-06 |
| 48h | 8.11E-04  | 4.82E-04 | 7.41E-04 | 3.57E-05 |
| 72h | 1.51E-03  | 1.23E-03 | 9.14E-04 | 7.91E-05 |
|     | cgd6_4110 |          |          |          |
| 2h  | 5.24E-04  | 3.88E-04 | 1.12E-04 | 2.95E-05 |
| 6h  | 5.79E-05  | 4.56E-04 | 5.86E-04 | 5.47E-05 |
| 12h | 1.29E-03  | 2.10E-03 | 2.12E-03 | 6.44E-05 |
| 24h | 6.16E-04  | 1.70E-03 | 3.58E-04 | 6.53E-05 |
| 36h | 6.03E-04  | 4.88E-04 | 1.10E-03 | 1.70E-04 |
| 48h | 1.31E-03  | 3.77E-04 | 2.36E-04 | 4.70E-05 |
| 72h | 3.91E-04  | 1.87E-04 | 3.85E-04 | 3.75E-05 |
|     | cgd6_4120 |          |          |          |
| 2h  | 2.77E-06  | 3.51E-06 | 1.23E-06 | 5.38E-07 |
| 6h  | 1.45E-06  | 4.16E-06 | 3.09E-06 | 3.66E-07 |
| 12h | 1.23E-07  | 1.23E-07 | 1.25E-07 | 3.99E-08 |
| 24h | 2.24E-06  | 1.53E-06 | 8.30E-07 | 4.71E-07 |
| 36h | 2.05E-06  | 1.22E-06 | 1.78E-06 | 5.18E-07 |
| 48h | 2.27E-06  | 3.74E-07 | 4.77E-07 | 2.09E-07 |
| 72h | 5.55E-07  | 4.21E-07 | 4.27E-07 | 2.93E-07 |
|     | cgd6_4140 |          |          |          |
| 2h  | 0.00E+00  | 0.00E+00 | 0.00E+00 | 0.00E+00 |

|           |          |          |          |          |
|-----------|----------|----------|----------|----------|
| 6h        | 0.00E+00 | 3.75E-08 | 1.65E-07 | 2.16E-09 |
| 12h       | 3.48E-06 | 4.40E-06 | 6.25E-06 | 8.19E-07 |
| 24h       | 4.86E-06 | 3.31E-06 | 4.44E-06 | 1.10E-06 |
| 36h       | 1.44E-05 | 9.95E-06 | 1.29E-05 | 9.28E-06 |
| 48h       | 8.38E-06 | 4.41E-06 | 8.90E-06 | 7.71E-07 |
| 72h       | 1.17E-05 | 4.53E-06 | 1.40E-05 | 3.11E-06 |
| cgd6_4150 |          |          |          |          |
| 2h        | 1.06E-08 | 3.13E-09 | 0.00E+00 | 2.04E-08 |
| 6h        | 8.90E-08 | 1.06E-07 | 2.03E-07 | 8.54E-08 |
| 12h       | 1.72E-06 | 3.36E-06 | 1.70E-06 | 2.77E-07 |
| 24h       | 3.86E-07 | 3.44E-07 | 2.28E-07 | 4.20E-07 |
| 36h       | 1.15E-06 | 9.83E-07 | 4.16E-07 | 7.18E-07 |
| 48h       | 1.22E-07 | 2.23E-07 | 2.46E-07 | 2.16E-07 |
| 72h       | 3.09E-07 | 1.53E-07 | 1.19E-07 | 2.04E-07 |
| cgd6_4160 |          |          |          |          |
| 2h        | 6.32E-09 | 0.00E+00 | 1.70E-08 | 0.00E+00 |
| 6h        | 0.00E+00 | 0.00E+00 | 0.00E+00 | 0.00E+00 |
| 12h       | 1.40E-05 | 3.67E-05 | 1.71E-05 | 1.87E-06 |
| 24h       | 1.88E-06 | 2.66E-06 | 5.28E-07 | 3.92E-07 |
| 36h       | 4.76E-07 | 9.03E-07 | 2.13E-06 | 1.06E-06 |
| 48h       | 2.63E-07 | 2.16E-07 | 3.06E-07 | 1.06E-07 |
| 72h       | 2.75E-07 | 1.06E-07 | 9.73E-08 | 4.97E-08 |
| cgd6_4170 |          |          |          |          |
| 2h        | 3.19E-04 | 4.65E-04 | 2.85E-04 | 5.48E-05 |
| 6h        | 9.08E-04 | 1.03E-03 | 6.95E-04 | 9.53E-05 |
| 12h       | 1.63E-03 | 6.23E-03 | 4.59E-03 | 2.79E-04 |
| 24h       | 7.02E-04 | 3.85E-03 | 3.73E-04 | 1.01E-04 |
| 36h       | 3.27E-04 | 4.50E-04 | 9.40E-04 | 1.75E-04 |
| 48h       | 4.58E-04 | 1.26E-04 | 5.20E-04 | 5.80E-05 |
| 72h       | 1.53E-04 | 8.37E-05 | 1.14E-04 | 2.26E-05 |
| cgd6_4180 |          |          |          |          |
| 2h        | 3.21E-07 | 1.79E-06 | 4.16E-07 | 3.93E-07 |
| 6h        | 2.23E-06 | 2.81E-06 | 7.29E-07 | 9.37E-07 |
| 12h       | 2.54E-06 | 6.02E-06 | 4.83E-06 | 2.21E-06 |
| 24h       | 1.97E-06 | 2.47E-06 | 6.25E-07 | 1.45E-06 |
| 36h       | 8.49E-07 | 1.02E-06 | 1.43E-06 | 2.23E-06 |
| 48h       | 7.22E-07 | 5.41E-07 | 4.51E-07 | 7.26E-07 |
| 72h       | 2.41E-07 | 1.40E-07 | 1.77E-07 | 2.16E-07 |
| cgd6_4200 |          |          |          |          |
| 2h        | 5.31E-07 | 1.12E-07 | 3.07E-07 | 2.31E-07 |
| 6h        | 5.60E-09 | 1.54E-08 | 1.66E-08 | 3.07E-08 |
| 12h       | 4.34E-07 | 6.69E-07 | 1.43E-06 | 1.93E-07 |
| 24h       | 3.25E-07 | 4.57E-07 | 2.48E-07 | 3.56E-07 |
| 36h       | 8.42E-07 | 7.97E-07 | 1.24E-06 | 8.36E-07 |
| 48h       | 5.51E-07 | 6.42E-07 | 9.61E-07 | 7.73E-07 |
| 72h       | 3.19E-07 | 2.46E-07 | 1.04E-07 | 1.65E-07 |
| cgd6_4220 |          |          |          |          |
| 2h        | 8.66E-07 | 3.46E-07 | 1.26E-06 | 1.04E-06 |
| 6h        | 3.87E-07 | 2.70E-07 | 1.22E-07 | 1.43E-07 |
| 12h       | 1.96E-06 | 9.62E-07 | 1.92E-06 | 3.57E-07 |
| 24h       | 2.13E-06 | 9.18E-07 | 5.06E-07 | 7.78E-07 |
| 36h       | 1.08E-06 | 4.82E-07 | 1.35E-06 | 5.51E-07 |
| 48h       | 2.53E-06 | 6.65E-07 | 4.15E-07 | 9.71E-07 |

|     |           |          |          |          |
|-----|-----------|----------|----------|----------|
| 72h | 4.04E-07  | 1.82E-07 | 1.39E-07 | 6.17E-08 |
|     | cgd6_4230 |          |          |          |
| 2h  | 3.09E-05  | 2.19E-05 | 1.01E-04 | 5.01E-06 |
| 6h  | 2.46E-06  | 1.44E-05 | 4.23E-06 | 4.35E-06 |
| 12h | 1.07E-05  | 1.48E-05 | 1.80E-05 | 3.79E-06 |
| 24h | 8.69E-06  | 1.36E-05 | 4.35E-06 | 4.82E-06 |
| 36h | 4.63E-06  | 1.19E-05 | 8.78E-06 | 5.89E-06 |
| 48h | 2.84E-06  | 2.30E-06 | 2.84E-06 | 9.61E-07 |
| 72h | 2.01E-06  | 2.85E-06 | 1.10E-05 | 6.16E-07 |
|     | cgd6_4240 |          |          |          |
| 2h  | 0.00E+00  | 0.00E+00 | 0.00E+00 | 0.00E+00 |
| 6h  | 0.00E+00  | 2.50E-09 | 4.27E-08 | 0.00E+00 |
| 12h | 7.53E-08  | 1.19E-07 | 7.43E-07 | 1.33E-07 |
| 24h | 2.14E-07  | 8.09E-08 | 1.22E-07 | 2.12E-07 |
| 36h | 3.12E-07  | 2.51E-07 | 6.08E-07 | 1.59E-07 |
| 48h | 4.41E-07  | 2.93E-07 | 5.25E-07 | 5.84E-07 |
| 72h | 7.05E-07  | 1.45E-07 | 5.93E-07 | 3.76E-07 |
|     | cgd6_4270 |          |          |          |
| 2h  | 3.30E-08  | 5.47E-08 | 2.93E-07 | 1.82E-07 |
| 6h  | 1.98E-08  | 3.44E-08 | 1.60E-08 | 3.32E-08 |
| 12h | 3.02E-06  | 5.25E-07 | 2.54E-06 | 5.36E-07 |
| 24h | 1.24E-06  | 2.32E-06 | 5.45E-07 | 3.07E-07 |
| 36h | 1.14E-06  | 6.52E-07 | 1.78E-06 | 6.97E-07 |
| 48h | 4.76E-07  | 4.68E-07 | 6.08E-07 | 3.76E-07 |
| 72h | 8.73E-07  | 2.59E-07 | 1.58E-07 | 2.89E-07 |
|     | cgd6_4280 |          |          |          |
| 2h  | 1.90E-05  | 1.25E-05 | 9.52E-06 | 4.58E-05 |
| 6h  | 1.68E-05  | 4.30E-06 | 1.18E-05 | 1.04E-05 |
| 12h | 2.39E-05  | 8.25E-06 | 6.35E-05 | 1.65E-05 |
| 24h | 3.76E-05  | 2.71E-05 | 2.29E-05 | 1.54E-05 |
| 36h | 9.83E-06  | 5.88E-06 | 1.63E-05 | 9.34E-06 |
| 48h | 7.05E-06  | 3.49E-06 | 3.51E-06 | 9.58E-06 |
| 72h | 3.74E-06  | 7.51E-07 | 2.30E-06 | 3.35E-06 |
|     | cgd6_4290 |          |          |          |
| 2h  | 2.18E-05  | 3.25E-05 | 3.59E-06 | 1.24E-05 |
| 6h  | 3.44E-04  | 3.97E-04 | 9.75E-04 | 3.90E-04 |
| 12h | 3.64E-05  | 4.02E-05 | 1.04E-04 | 2.47E-05 |
| 24h | 3.88E-05  | 6.70E-05 | 2.22E-04 | 1.77E-04 |
| 36h | 7.76E-05  | 1.37E-04 | 1.19E-04 | 5.35E-05 |
| 48h | 2.71E-05  | 2.47E-05 | 2.64E-05 | 3.27E-05 |
| 72h | 7.76E-06  | 4.60E-06 | 3.38E-06 | 6.08E-06 |
|     | cgd6_4310 |          |          |          |
| 2h  | 5.89E-05  | 8.83E-06 | 0.00E+00 | 9.69E-05 |
| 6h  | 1.56E-03  | 6.10E-05 | 3.59E-04 | 1.13E-03 |
| 12h | 7.42E-04  | 1.22E-05 | 1.38E-04 | 1.12E-04 |
| 24h | 3.26E-04  | 1.95E-05 | 1.44E-04 | 1.32E-04 |
| 36h | 7.80E-04  | 5.26E-05 | 1.15E-04 | 2.33E-04 |
| 48h | 6.91E-04  | 3.58E-05 | 1.38E-04 | 1.28E-04 |
| 72h | 1.00E-04  | 9.28E-06 | 4.94E-05 | 2.37E-04 |
|     | cgd6_4320 |          |          |          |
| 2h  | 3.42E-06  | 3.03E-06 | 1.85E-06 | 1.61E-06 |
| 6h  | 9.63E-06  | 5.43E-06 | 1.30E-05 | 6.33E-06 |
| 12h | 1.98E-06  | 4.90E-07 | 5.06E-06 | 1.21E-06 |

|           |          |          |          |          |
|-----------|----------|----------|----------|----------|
| 24h       | 1.37E-06 | 1.38E-06 | 2.65E-06 | 2.04E-06 |
| 36h       | 2.89E-06 | 1.80E-06 | 1.72E-06 | 6.25E-07 |
| 48h       | 5.36E-07 | 6.14E-07 | 1.33E-06 | 3.89E-07 |
| 72h       | 3.03E-07 | 2.70E-07 | 1.72E-07 | 3.56E-07 |
| cgd6_4330 |          |          |          |          |
| 2h        | 0.00E+00 | 0.00E+00 | 0.00E+00 | 0.00E+00 |
| 6h        | 0.00E+00 | 0.00E+00 | 0.00E+00 | 0.00E+00 |
| 12h       | 1.83E-06 | 1.33E-06 | 4.80E-06 | 3.83E-07 |
| 24h       | 3.72E-07 | 1.35E-06 | 3.36E-07 | 2.53E-07 |
| 36h       | 2.35E-06 | 2.04E-06 | 3.32E-06 | 1.52E-06 |
| 48h       | 1.21E-06 | 6.19E-07 | 9.47E-07 | 1.03E-06 |
| 72h       | 7.28E-07 | 3.09E-07 | 7.85E-07 | 1.47E-06 |
| cgd6_4340 |          |          |          |          |
| 2h        | 5.83E-06 | 1.56E-06 | 7.54E-07 | 1.48E-05 |
| 6h        | 2.33E-06 | 8.72E-07 | 9.10E-06 | 2.17E-06 |
| 12h       | 3.62E-06 | 1.36E-06 | 1.22E-05 | 1.66E-06 |
| 24h       | 7.61E-07 | 1.00E-06 | 4.76E-06 | 2.32E-06 |
| 36h       | 3.81E-06 | 3.62E-06 | 5.15E-06 | 4.21E-06 |
| 48h       | 1.65E-06 | 2.15E-06 | 2.84E-06 | 3.14E-06 |
| 72h       | 8.18E-07 | 7.91E-07 | 1.49E-06 | 1.63E-06 |
| cgd6_4350 |          |          |          |          |
| 2h        | 1.34E-06 | 3.59E-06 | 2.91E-07 | 2.06E-06 |
| 6h        | 2.22E-05 | 9.75E-06 | 6.06E-05 | 2.91E-05 |
| 12h       | 1.34E-05 | 3.62E-06 | 1.86E-05 | 6.57E-06 |
| 24h       | 7.25E-06 | 5.07E-06 | 4.94E-05 | 1.40E-05 |
| 36h       | 1.82E-05 | 2.84E-05 | 3.26E-05 | 2.69E-05 |
| 48h       | 1.50E-05 | 1.53E-05 | 1.02E-05 | 5.57E-05 |
| 72h       | 5.42E-07 | 9.44E-07 | 2.63E-06 | 1.91E-06 |
| cgd6_4360 |          |          |          |          |
| 2h        | 6.16E-07 | 7.98E-08 | 1.14E-08 | 1.07E-07 |
| 6h        | 3.86E-06 | 2.00E-06 | 2.42E-05 | 1.05E-05 |
| 12h       | 4.20E-06 | 3.80E-06 | 6.85E-06 | 7.20E-07 |
| 24h       | 1.47E-06 | 5.42E-07 | 8.80E-06 | 3.28E-06 |
| 36h       | 3.40E-06 | 4.21E-06 | 4.31E-06 | 2.11E-06 |
| 48h       | 6.79E-03 | 4.04E-06 | 3.14E-06 | 4.63E-06 |
| 72h       | 3.28E-07 | 2.21E-07 | 2.69E-07 | 4.36E-07 |
| cgd6_4370 |          |          |          |          |
| 2h        | 2.03E-06 | 2.46E-05 | 7.55E-07 | 1.54E-06 |
| 6h        | 1.49E-06 | 7.48E-05 | 1.17E-05 | 1.36E-05 |
| 12h       | 1.68E-06 | 8.99E-06 | 1.97E-05 | 3.57E-06 |
| 24h       | 4.44E-06 | 8.72E-06 | 1.86E-05 | 1.08E-05 |
| 36h       | 3.07E-06 | 2.59E-05 | 1.27E-05 | 5.41E-06 |
| 48h       | 1.03E-05 | 7.07E-05 | 2.08E-05 | 1.98E-05 |
| 72h       | 2.45E-06 | 1.42E-05 | 1.35E-05 | 1.95E-05 |
| cgd6_4380 |          |          |          |          |
| 2h        | 0.00E+00 | 0.00E+00 | 0.00E+00 | 0.00E+00 |
| 6h        | 0.00E+00 | 0.00E+00 | 0.00E+00 | 0.00E+00 |
| 12h       | 9.19E-07 | 7.61E-07 | 4.13E-06 | 8.12E-07 |
| 24h       | 4.51E-07 | 2.61E-06 | 2.96E-06 | 1.20E-06 |
| 36h       | 5.94E-06 | 2.49E-05 | 1.62E-05 | 2.78E-06 |
| 48h       | 2.04E-06 | 1.32E-05 | 0.00E+00 | 2.58E-06 |
| 72h       | 1.24E-03 | 1.49E-05 | 5.15E-06 | 1.33E-06 |
| cgd6_4390 |          |          |          |          |

|     |           |          |          |          |
|-----|-----------|----------|----------|----------|
| 2h  | 0.00E+00  | 0.00E+00 | 0.00E+00 | 0.00E+00 |
| 6h  | 1.43E-07  | 2.83E-07 | 1.38E-07 | 6.15E-07 |
| 12h | 1.25E-06  | 1.17E-06 | 3.08E-06 | 1.74E-06 |
| 24h | 5.48E-07  | 1.38E-06 | 1.91E-06 | 1.33E-06 |
| 36h | 2.40E-06  | 1.19E-06 | 5.75E-06 | 3.02E-06 |
| 48h | 1.41E-06  | 1.30E-06 | 2.29E-06 | 2.79E-06 |
| 72h | 9.22E-07  | 1.85E-07 | 6.02E-07 | 5.65E-07 |
|     | cgd6_4400 |          |          |          |
| 2h  | 2.57E-05  | 1.79E-05 | 1.79E-04 | 5.41E-05 |
| 6h  | 1.86E-04  | 2.63E-04 | 2.03E-03 | 7.75E-04 |
| 12h | 3.44E-06  | 1.12E-05 | 1.05E-03 | 1.30E-04 |
| 24h | 5.76E-05  | 8.83E-05 | 4.66E-03 | 5.13E-04 |
| 36h | 6.67E-05  | 6.67E-05 | 7.22E-04 | 1.78E-04 |
| 48h | 7.20E-05  | 6.77E-05 | 9.75E-04 | 2.34E-04 |
| 72h | 3.36E-05  | 2.81E-05 | 5.72E-04 | 2.03E-04 |
|     | cgd6_4410 |          |          |          |
| 2h  | 0.00E+00  | 0.00E+00 | 0.00E+00 | 3.90E-09 |
| 6h  | 4.16E-08  | 8.80E-08 | 1.12E-07 | 2.10E-07 |
| 12h | 2.46E-08  | 1.47E-08 | 8.82E-08 | 8.07E-08 |
| 24h | 4.58E-08  | 5.62E-08 | 4.58E-07 | 5.30E-07 |
| 36h | 5.73E-07  | 3.03E-07 | 6.82E-07 | 2.68E-07 |
| 48h | 2.97E-07  | 1.35E-07 | 3.25E-07 | 4.42E-07 |
| 72h | 5.31E-07  | 1.41E-07 | 2.91E-06 | 4.57E-07 |
|     | cgd6_4420 |          |          |          |
| 2h  | 6.49E-08  | 1.06E-07 | 0.00E+00 | 9.67E-09 |
| 6h  | 4.50E-09  | 1.82E-08 | 1.05E-08 | 1.99E-08 |
| 12h | 7.20E-08  | 6.75E-07 | 7.64E-07 | 3.12E-07 |
| 24h | 1.21E-07  | 2.37E-07 | 1.78E-06 | 8.64E-07 |
| 36h | 1.87E-06  | 2.38E-06 | 4.52E-06 | 2.15E-06 |
| 48h | 3.11E-06  | 2.76E-06 | 1.12E-05 | 6.05E-06 |
| 72h | 8.70E-06  | 7.58E-06 | 2.06E-05 | 1.52E-05 |
|     | cgd6_4440 |          |          |          |
| 2h  | 4.61E-08  | 0.00E+00 | 0.00E+00 | 0.00E+00 |
| 6h  | 0.00E+00  | 0.00E+00 | 0.00E+00 | 0.00E+00 |
| 12h | 9.31E-07  | 5.09E-06 | 5.60E-05 | 1.66E-06 |
| 24h | 2.76E-06  | 2.65E-06 | 2.38E-05 | 1.37E-05 |
| 36h | 6.25E-06  | 2.55E-06 | 4.90E-05 | 1.25E-05 |
| 48h | 2.11E-04  | 1.36E-04 | 1.83E-03 | 6.53E-04 |
| 72h | 6.73E-04  | 2.95E-04 | 2.78E-03 | 1.27E-03 |
|     | cgd6_4460 |          |          |          |
| 2h  | 2.40E-08  | 4.22E-08 | 1.97E-08 | 6.00E-09 |
| 6h  | 4.83E-07  | 3.15E-07 | 4.26E-07 | 1.14E-06 |
| 12h | 1.87E-04  | 3.12E-04 | 1.58E-04 | 2.69E-04 |
| 24h | 1.96E-05  | 1.71E-05 | 1.13E-05 | 1.03E-05 |
| 36h | 6.63E-06  | 7.49E-06 | 1.46E-05 | 5.97E-05 |
| 48h | 8.77E-06  | 5.85E-06 | 1.42E-05 | 9.68E-06 |
| 72h | 3.42E-06  | 7.05E-06 | 5.01E-06 | 1.25E-05 |
|     | cgd6_4470 |          |          |          |
| 2h  | 2.58E-04  | 1.65E-04 | 5.25E-04 | 3.16E-04 |
| 6h  | 1.93E-04  | 1.50E-04 | 2.00E-03 | 6.68E-04 |
| 12h | 5.88E-05  | 5.71E-05 | 9.92E-04 | 3.93E-04 |
| 24h | 1.88E-04  | 8.35E-05 | 7.28E-04 | 3.80E-04 |
| 36h | 9.29E-05  | 9.18E-05 | 3.76E-04 | 1.76E-04 |



|     |           |          |          |          |
|-----|-----------|----------|----------|----------|
| 48h | 7.04E-05  | 1.36E-05 | 2.80E-04 | 1.87E-04 |
| 72h | 3.52E-05  | 2.83E-05 | 2.16E-04 | 1.40E-04 |
|     | cgd6_4480 |          |          |          |
| 2h  | 0.00E+00  | 3.92E-08 | 0.00E+00 | 1.99E-08 |
| 6h  | 3.23E-08  | 3.61E-08 | 8.61E-08 | 7.73E-08 |
| 12h | 1.72E-08  | 1.31E-07 | 3.95E-07 | 4.78E-08 |
| 24h | 3.50E-08  | 4.18E-08 | 1.32E-07 | 2.01E-07 |
| 36h | 5.95E-07  | 2.83E-07 | 5.51E-07 | 3.52E-07 |
| 48h | 2.46E-07  | 1.26E-07 | 6.14E-07 | 4.28E-07 |
| 72h | 1.59E-07  | 1.44E-07 | 2.53E-07 | 2.74E-07 |
|     | cgd6_4490 |          |          |          |
| 2h  | 2.19E-06  | 5.43E-08 | 2.72E-07 | 5.43E-07 |
| 6h  | 1.06E-07  | 9.43E-08 | 4.25E-07 | 6.98E-07 |
| 12h | 1.06E-07  | 1.23E-08 | 6.36E-07 | 3.32E-07 |
| 24h | 3.57E-07  | 2.51E-07 | 1.07E-06 | 6.86E-07 |
| 36h | 1.03E-06  | 5.61E-07 | 3.36E-06 | 6.21E-07 |
| 48h | 9.26E-07  | 3.79E-07 | 2.92E-06 | 1.41E-06 |
| 72h | 4.18E-06  | 1.80E-06 | 1.86E-05 | 3.01E-06 |
|     | cgd6_4500 |          |          |          |
| 2h  | 1.77E-05  | 2.49E-07 | 2.18E-05 | 4.54E-06 |
| 6h  | 2.41E-05  | 4.29E-05 | 1.25E-03 | 6.60E-04 |
| 12h | 4.32E-06  | 8.45E-06 | 1.36E-04 | 4.18E-05 |
| 24h | 2.84E-05  | 1.54E-05 | 1.90E-03 | 2.83E-04 |
| 36h | 4.65E-05  | 5.34E-05 | 1.43E-03 | 1.33E-04 |
| 48h | 9.40E-05  | 4.57E-05 | 1.57E-03 | 3.25E-04 |
| 72h | 2.46E-04  | 2.00E-04 | 1.86E-03 | 2.42E-03 |
|     | cgd6_4510 |          |          |          |
| 2h  | 3.40E-07  | 6.33E-08 | 4.95E-08 | 5.57E-08 |
| 6h  | 6.69E-07  | 8.12E-07 | 9.18E-07 | 1.94E-06 |
| 12h | 2.98E-08  | 2.40E-08 | 9.54E-07 | 2.60E-07 |
| 24h | 2.23E-07  | 1.46E-07 | 9.09E-07 | 1.37E-06 |
| 36h | 4.27E-07  | 5.03E-07 | 1.08E-06 | 8.24E-07 |
| 48h | 7.56E-07  | 3.12E-07 | 1.02E-06 | 5.32E-07 |
| 72h | 8.89E-07  | 6.42E-07 | 1.37E-06 | 1.69E-06 |
|     | cgd6_4530 |          |          |          |
| 2h  | 0.00E+00  | 5.16E-08 | 0.00E+00 | 0.00E+00 |
| 6h  | 0.00E+00  | 5.78E-09 | 4.69E-06 | 1.58E-07 |
| 12h | 3.32E-06  | 1.59E-05 | 3.79E-05 | 9.99E-06 |
| 24h | 2.17E-06  | 2.15E-06 | 3.23E-05 | 1.43E-05 |
| 36h | 2.62E-05  | 2.42E-05 | 3.74E-04 | 6.71E-05 |
| 48h | 1.41E-05  | 9.27E-06 | 8.24E-05 | 3.33E-04 |
| 72h | 2.64E-05  | 9.03E-06 | 5.62E-04 | 5.76E-05 |
|     | cgd6_5480 |          |          |          |
| 2h  | 0.00E+00  | 0.00E+00 | 0.00E+00 | 0.00E+00 |
| 6h  | 7.80E-09  | 4.14E-09 | 9.89E-10 | 0.00E+00 |
| 12h | 0.00E+00  | 0.00E+00 | 0.00E+00 | 0.00E+00 |
| 24h | 9.58E-10  | 4.46E-10 | 7.22E-11 | 2.61E-09 |
| 36h | 1.23E-09  | 2.84E-10 | 2.81E-09 | 1.32E-09 |
| 48h | 1.86E-10  | 2.12E-09 | 4.64E-10 | 2.40E-09 |
| 72h | 1.46E-09  | 1.17E-09 | 1.46E-09 | 0.00E+00 |
|     | cgd6_5450 |          |          |          |
| 2h  | 1.98E-08  | 1.90E-07 | 2.87E-08 | 0.00E+00 |
| 6h  | 6.84E-07  | 4.20E-07 | 1.98E-07 | 1.25E-06 |

|     |           |          |          |          |
|-----|-----------|----------|----------|----------|
| 12h | 3.07E-06  | 1.32E-06 | 5.09E-07 | 4.11E-07 |
| 24h | 2.75E-06  | 3.20E-06 | 8.77E-07 | 5.49E-06 |
| 36h | 1.09E-05  | 7.36E-06 | 3.11E-06 | 4.68E-06 |
| 48h | 5.40E-06  | 1.94E-06 | 1.01E-06 | 5.97E-06 |
| 72h | 1.12E-06  | 2.88E-07 | 2.94E-07 | 1.40E-06 |
|     | cgd6_5440 |          |          |          |
| 2h  | 8.91E-07  | 3.54E-06 | 3.35E-06 | 4.44E-07 |
| 6h  | 9.72E-07  | 6.55E-07 | 7.13E-07 | 1.18E-06 |
| 12h | 2.23E-05  | 6.47E-05 | 3.86E-05 | 3.42E-05 |
| 24h | 1.35E-05  | 2.82E-05 | 3.59E-06 | 1.04E-05 |
| 36h | 2.78E-05  | 3.70E-05 | 3.03E-05 | 2.05E-05 |
| 48h | 7.92E-06  | 9.62E-06 | 2.33E-06 | 1.16E-05 |
| 72h | 1.17E-06  | 9.88E-07 | 7.22E-07 | 6.08E-07 |
|     | cgd6_3070 |          |          |          |
| 2h  | 5.49E-06  | 3.68E-06 | 5.27E-07 | 3.88E-06 |
| 6h  | 3.32E-06  | 6.27E-06 | 1.21E-06 | 3.91E-06 |
| 12h | 2.55E-05  | 3.51E-06 | 4.82E-06 | 6.77E-06 |
| 24h | 7.59E-06  | 4.57E-06 | 2.43E-06 | 2.45E-06 |
| 36h | 7.11E-07  | 9.65E-07 | 1.38E-06 | 1.93E-06 |
| 48h | 5.17E-05  | 6.52E-07 | 9.45E-07 | 4.52E-07 |
| 72h | 5.11E-07  | 5.44E-07 | 3.28E-07 | 8.58E-07 |
|     | cgd6_3080 |          |          |          |
| 2h  | 2.07E-04  | 6.12E-04 | 4.20E-06 | 2.11E-04 |
| 6h  | 2.66E-04  | 6.40E-04 | 1.71E-05 | 1.31E-04 |
| 12h | 3.43E-02  | 6.81E-03 | 8.04E-04 | 1.76E-03 |
| 24h | 3.20E-03  | 4.47E-03 | 1.62E-04 | 5.92E-04 |
| 36h | 3.50E-03  | 8.85E-04 | 5.44E-04 | 1.23E-03 |
| 48h | 2.29E-03  | 6.01E-04 | 7.28E-05 | 2.83E-04 |
| 72h | 1.72E-03  | 5.14E-04 | 1.47E-04 | 1.37E-04 |
|     | cgd6_3090 |          |          |          |
| 2h  | 1.39E-07  | 1.31E-08 | 3.11E-09 | 5.90E-09 |
| 6h  | 2.13E-08  | 7.95E-09 | 1.63E-08 | 5.54E-08 |
| 12h | 4.98E-09  | 0.00E+00 | 6.10E-08 | 1.40E-08 |
| 24h | 8.76E-08  | 6.20E-08 | 2.37E-07 | 1.29E-07 |
| 36h | 1.35E-07  | 1.01E-07 | 1.45E-07 | 7.64E-08 |
| 48h | 1.46E-06  | 4.29E-07 | 3.20E-07 | 4.11E-07 |
| 72h | 6.67E-06  | 9.49E-07 | 1.22E-06 | 8.49E-07 |
|     | cgd6_3100 |          |          |          |
| 2h  | 2.88E-04  | 5.40E-04 | 3.97E-05 | 2.49E-03 |
| 6h  | 6.95E-04  | 4.97E-04 | 1.81E-04 | 1.28E-03 |
| 12h | 3.65E-04  | 7.91E-04 | 4.17E-04 | 7.63E-04 |
| 24h | 2.27E-04  | 8.55E-04 | 3.21E-04 | 9.41E-04 |
| 36h | 2.35E-04  | 1.61E-04 | 3.41E-04 | 4.21E-04 |
| 48h | 6.67E-05  | 1.53E-04 | 7.21E-05 | 2.85E-04 |
| 72h | 3.13E-04  | 2.23E-04 | 4.16E-04 | 2.20E-03 |
|     | cgd6_3120 |          |          |          |
| 2h  | 0.00E+00  | 0.00E+00 | 0.00E+00 | 1.61E-08 |
| 6h  | 0.00E+00  | 0.00E+00 | 0.00E+00 | 0.00E+00 |
| 12h | 3.70E-04  | 7.29E-05 | 5.89E-06 | 1.21E-05 |
| 24h | 1.15E-05  | 5.30E-05 | 5.71E-06 | 9.63E-06 |
| 36h | 6.47E-05  | 1.74E-04 | 5.81E-05 | 4.86E-05 |
| 48h | 6.66E-04  | 8.40E-05 | 2.86E-05 | 2.23E-05 |
| 72h | 1.92E-04  | 9.47E-05 | 2.29E-05 | 2.17E-05 |

|     |           |          |          |          |
|-----|-----------|----------|----------|----------|
|     | cgd6_3130 |          |          |          |
| 2h  | 1.14E-06  | 2.35E-07 | 4.53E-07 | 2.14E-07 |
| 6h  | 6.91E-08  | 4.60E-08 | 0.00E+00 | 0.00E+00 |
| 12h | 4.48E-02  | 3.63E-03 | 6.82E-04 | 1.71E-03 |
| 24h | 1.10E-04  | 3.72E-04 | 1.72E-05 | 4.52E-05 |
| 36h | 3.60E-05  | 4.44E-05 | 2.33E-04 | 1.84E-04 |
| 48h | 4.74E-05  | 2.36E-05 | 7.88E-06 | 1.22E-05 |
| 72h | 8.75E-06  | 1.47E-05 | 3.54E-06 | 4.40E-06 |
|     | cgd6_3140 |          |          |          |
| 2h  | 9.91E-06  | 1.29E-06 | 1.44E-06 | 2.98E-06 |
| 6h  | 4.02E-06  | 4.60E-06 | 6.31E-07 | 3.11E-06 |
| 12h | 3.81E-06  | 2.00E-06 | 2.54E-06 | 3.95E-06 |
| 24h | 4.62E-06  | 3.29E-06 | 2.16E-06 | 7.24E-06 |
| 36h | 8.27E-07  | 1.70E-06 | 2.26E-06 | 2.30E-06 |
| 48h | 3.89E-06  | 1.67E-06 | 1.90E-06 | 2.81E-06 |
| 72h | 8.14E-06  | 3.24E-06 | 4.06E-06 | 2.80E-06 |
|     | cgd6_3150 |          |          |          |
| 2h  | 3.43E-06  | 3.77E-06 | 0.00E+00 | 1.40E-06 |
| 6h  | 1.61E-03  | 2.24E-04 | 3.37E-05 | 9.94E-05 |
| 12h | 1.14E-03  | 1.79E-04 | 4.48E-05 | 5.69E-05 |
| 24h | 3.42E-04  | 1.50E-04 | 2.61E-05 | 6.74E-05 |
| 36h | 7.93E-05  | 1.45E-04 | 5.82E-05 | 5.67E-05 |
| 48h | 1.06E-03  | 1.76E-04 | 4.78E-05 | 9.91E-05 |
| 72h | 1.60E-03  | 1.60E-03 | 1.43E-04 | 2.73E-04 |
|     | cgd6_3160 |          |          |          |
| 2h  | 7.89E-08  | 1.17E-08 | 0.00E+00 | 5.74E-08 |
| 6h  | 2.45E-08  | 7.95E-08 | 1.95E-07 | 2.43E-07 |
| 12h | 7.80E-06  | 4.09E-06 | 1.79E-06 | 2.36E-06 |
| 24h | 1.47E-06  | 1.93E-06 | 1.38E-06 | 2.23E-06 |
| 36h | 2.08E-06  | 2.08E-06 | 3.62E-06 | 1.89E-06 |
| 48h | 1.30E-05  | 3.46E-06 | 2.87E-06 | 4.04E-06 |
| 72h | 1.62E-05  | 2.26E-06 | 3.27E-06 | 1.62E-06 |
|     | cgd6_3170 |          |          |          |
| 2h  | 2.77E-04  | 8.13E-04 | 8.64E-06 | 2.58E-04 |
| 6h  | 8.83E-04  | 2.05E-03 | 1.89E-04 | 2.46E-03 |
| 12h | 1.27E-04  | 1.13E-04 | 4.62E-05 | 1.18E-04 |
| 24h | 9.92E-05  | 7.31E-04 | 7.48E-04 | 6.29E-04 |
| 36h | 3.94E-04  | 2.94E-04 | 1.76E-04 | 3.63E-04 |
| 48h | 4.57E-04  | 2.51E-04 | 5.71E-05 | 5.65E-04 |
| 72h | 5.74E-04  | 2.32E-04 | 5.45E-05 | 6.28E-05 |
|     | cgd6_3180 |          |          |          |
| 2h  | 5.76E-04  | 4.10E-04 | 3.37E-04 | 4.41E-04 |
| 6h  | 4.27E-03  | 3.60E-03 | 4.76E-04 | 2.49E-03 |
| 12h | 6.36E-04  | 1.80E-04 | 5.62E-04 | 5.30E-04 |
| 24h | 3.70E-04  | 9.94E-04 | 9.25E-04 | 8.65E-04 |
| 36h | 2.73E-04  | 2.63E-04 | 2.58E-04 | 2.14E-04 |
| 48h | 3.87E-04  | 8.94E-05 | 1.15E-04 | 1.77E-04 |
| 72h | 1.28E-04  | 2.31E-05 | 1.84E-05 | 2.03E-05 |
|     | cgd6_3190 |          |          |          |
| 2h  | 8.60E-04  | 3.46E-04 | 1.65E-04 | 6.59E-04 |
| 6h  | 1.22E-03  | 1.34E-03 | 2.84E-04 | 1.35E-03 |
| 12h | 6.41E-04  | 2.54E-04 | 9.27E-04 | 4.14E-04 |
| 24h | 2.83E-04  | 5.89E-04 | 4.65E-04 | 5.72E-04 |

|     |           |          |          |          |
|-----|-----------|----------|----------|----------|
| 36h | 3.36E-04  | 4.29E-04 | 2.88E-04 | 2.77E-04 |
| 48h | 2.98E-04  | 9.58E-05 | 4.53E-05 | 6.95E-05 |
| 72h | 1.17E-04  | 5.23E-05 | 2.80E-05 | 3.40E-05 |
|     | cgd6_4540 |          |          |          |
| 2h  | 0.00E+00  | 0.00E+00 | 0.00E+00 | 0.00E+00 |
| 6h  | 0.00E+00  | 0.00E+00 | 0.00E+00 | 0.00E+00 |
| 12h | 6.11E-04  | 5.96E-05 | 3.53E-04 | 9.69E-05 |
| 24h | 8.46E-05  | 5.69E-05 | 7.57E-05 | 2.68E-05 |
| 36h | 1.33E-04  | 6.69E-05 | 3.13E-04 | 5.21E-05 |
| 48h | 1.22E-04  | 2.57E-05 | 7.48E-05 | 3.31E-05 |
| 72h | 5.81E-05  | 5.91E-06 | 1.63E-05 | 7.74E-06 |
|     | cgd6_4550 |          |          |          |
| 2h  | 0.00E+00  | 0.00E+00 | 0.00E+00 | 0.00E+00 |
| 6h  | 3.89E-08  | 2.36E-08 | 4.00E-07 | 2.75E-07 |
| 12h | 8.67E-07  | 3.88E-06 | 1.23E-06 | 7.64E-07 |
| 24h | 8.92E-07  | 9.34E-07 | 1.65E-06 | 9.06E-07 |
| 36h | 1.25E-06  | 1.78E-06 | 1.33E-06 | 1.01E-06 |
| 48h | 7.16E-07  | 7.41E-07 | 1.58E-06 | 9.06E-07 |
| 72h | 9.33E-07  | 4.05E-07 | 1.21E-06 | 1.02E-06 |
|     | cgd6_4570 |          |          |          |
| 2h  | 2.35E-08  | 1.18E-08 | 3.87E-08 | 9.11E-08 |
| 6h  | 0.00E+00  | 3.47E-10 | 0.00E+00 | 1.00E-08 |
| 12h | 4.09E-07  | 8.04E-07 | 3.05E-07 | 2.14E-07 |
| 24h | 1.43E-07  | 2.15E-07 | 1.73E-07 | 1.21E-07 |
| 36h | 3.38E-07  | 3.13E-07 | 8.20E-07 | 6.33E-07 |
| 48h | 8.33E-07  | 7.56E-07 | 1.51E-06 | 1.06E-06 |
| 72h | 5.46E-07  | 3.41E-07 | 3.99E-07 | 8.16E-07 |
|     | cgd6_4580 |          |          |          |
| 2h  | 8.64E-04  | 7.33E-05 | 2.19E-04 | 3.61E-04 |
| 6h  | 1.79E-04  | 4.41E-05 | 2.73E-04 | 1.39E-04 |
| 12h | 3.66E-04  | 6.81E-04 | 3.86E-04 | 1.92E-04 |
| 24h | 1.64E-04  | 1.03E-04 | 4.20E-04 | 1.30E-04 |
| 36h | 2.26E-04  | 1.01E-04 | 2.05E-04 | 1.56E-04 |
| 48h | 2.64E-04  | 6.11E-05 | 2.37E-04 | 9.19E-05 |
| 72h | 9.11E-05  | 4.99E-04 | 1.71E-04 | 8.82E-05 |
|     | cgd6_4590 |          |          |          |
| 2h  | 2.89E-05  | 2.61E-07 | 1.22E-06 | 4.71E-06 |
| 6h  | 3.30E-06  | 3.51E-08 | 3.21E-07 | 2.41E-07 |
| 12h | 1.24E-08  | 6.00E-08 | 7.88E-07 | 3.66E-07 |
| 24h | 2.21E-06  | 8.78E-07 | 3.72E-06 | 4.76E-07 |
| 36h | 7.51E-06  | 2.33E-06 | 2.69E-06 | 2.38E-06 |
| 48h | 6.12E-05  | 9.98E-06 | 1.40E-05 | 6.71E-06 |
| 72h | 3.37E-05  | 9.60E-06 | 4.50E-05 | 2.47E-05 |
|     | cgd6_4600 |          |          |          |
| 2h  | 8.51E-08  | 3.91E-08 | 3.83E-08 | 6.62E-09 |
| 6h  | 8.11E-07  | 2.49E-07 | 9.02E-07 | 3.19E-07 |
| 12h | 4.35E-08  | 1.01E-07 | 5.85E-08 | 1.25E-07 |
| 24h | 2.54E-07  | 1.08E-07 | 4.69E-07 | 1.23E-07 |
| 36h | 5.88E-07  | 2.18E-07 | 6.62E-07 | 5.66E-07 |
| 48h | 4.04E-07  | 7.35E-08 | 1.68E-07 | 1.37E-07 |
| 72h | 4.38E-07  | 1.90E-07 | 1.19E-06 | 2.69E-07 |
|     | cgd6_4610 |          |          |          |
| 2h  | 0.00E+00  | 0.00E+00 | 0.00E+00 | 0.00E+00 |

|     |           |          |          |          |
|-----|-----------|----------|----------|----------|
| 6h  | 2.40E-05  | 1.96E-07 | 1.74E-07 | 5.57E-07 |
| 12h | 6.19E-06  | 0.00E+00 | 6.37E-08 | 1.71E-07 |
| 24h | 5.66E-06  | 3.92E-08 | 1.45E-06 | 4.72E-07 |
| 36h | 2.13E-05  | 9.29E-07 | 4.88E-07 | 5.09E-07 |
| 48h | 2.42E-05  | 1.30E-06 | 2.41E-06 | 6.27E-07 |
| 72h | 5.86E-05  | 9.84E-07 | 4.26E-06 | 3.07E-06 |
|     | cgd6_4630 |          |          |          |
| 2h  | 3.28E-06  | 2.93E-06 | 1.61E-06 | 4.89E-06 |
| 6h  | 7.02E-06  | 6.67E-06 | 1.69E-05 | 4.60E-05 |
| 12h | 1.57E-06  | 5.09E-06 | 5.36E-06 | 1.07E-05 |
| 24h | 3.66E-06  | 5.71E-06 | 1.55E-05 | 4.10E-06 |
| 36h | 2.13E-06  | 5.44E-06 | 2.43E-06 | 4.40E-06 |
| 48h | 1.65E-06  | 2.01E-06 | 2.01E-06 | 1.83E-06 |
| 72h | 9.34E-07  | 1.08E-06 | 2.60E-06 | 1.96E-06 |
|     | cgd6_4650 |          |          |          |
| 2h  | 3.64E-06  | 1.03E-06 | 4.16E-07 | 7.23E-06 |
| 6h  | 8.45E-07  | 1.52E-06 | 5.56E-06 | 1.37E-06 |
| 12h | 1.79E-06  | 7.99E-07 | 2.61E-06 | 4.18E-06 |
| 24h | 3.82E-06  | 1.99E-06 | 4.35E-06 | 4.21E-06 |
| 36h | 1.56E-06  | 9.30E-07 | 2.18E-06 | 2.18E-06 |
| 48h | 2.04E-06  | 1.50E-06 | 2.52E-06 | 2.47E-06 |
| 72h | 2.98E-06  | 1.39E-06 | 2.73E-06 | 1.55E-06 |
|     | cgd6_4660 |          |          |          |
| 2h  | 3.65E-07  | 1.22E-07 | 6.39E-09 | 5.56E-07 |
| 6h  | 1.29E-08  | 4.34E-09 | 4.17E-09 | 1.65E-08 |
| 12h | 1.23E-05  | 2.51E-06 | 7.59E-06 | 5.57E-06 |
| 24h | 3.13E-06  | 2.57E-06 | 6.02E-07 | 4.34E-07 |
| 36h | 6.53E-07  | 4.70E-07 | 1.93E-06 | 1.24E-06 |
| 48h | 2.19E-06  | 4.89E-07 | 8.73E-07 | 9.70E-07 |
| 72h | 8.63E-07  | 1.33E-07 | 4.91E-07 | 3.39E-07 |
|     | cgd6_4670 |          |          |          |
| 2h  | 3.86E-07  | 4.78E-07 | 1.19E-08 | 6.93E-07 |
| 6h  | 9.42E-08  | 1.14E-07 | 2.39E-07 | 2.69E-07 |
| 12h | 4.18E-08  | 1.22E-07 | 2.49E-07 | 1.81E-07 |
| 24h | 9.94E-08  | 3.97E-08 | 5.03E-07 | 3.12E-07 |
| 36h | 1.98E-07  | 1.18E-07 | 2.40E-07 | 1.59E-07 |
| 48h | 8.33E-08  | 6.19E-08 | 1.80E-05 | 2.07E-07 |
| 72h | 6.89E-06  | 8.30E-08 | 2.04E-07 | 1.43E-07 |
|     | cgd6_3210 |          |          |          |
| 2h  | 2.08E-04  | 7.34E-06 | 6.33E-06 | 5.04E-05 |
| 6h  | 2.39E-06  | 5.35E-06 | 2.04E-06 | 3.85E-06 |
| 12h | 2.34E-06  | 1.68E-05 | 6.19E-06 | 1.57E-05 |
| 24h | 2.96E-05  | 4.91E-05 | 7.10E-06 | 1.37E-06 |
| 36h | 7.27E-06  | 1.42E-05 | 3.79E-06 | 8.88E-06 |
| 48h | 5.94E-06  | 1.81E-06 | 4.23E-06 | 1.07E-05 |
| 72h | 3.11E-06  | 5.43E-06 | 1.39E-06 | 8.09E-06 |
|     | cgd6_3220 |          |          |          |
| 2h  | 4.61E-08  | 0.00E+00 | 1.10E-08 | 3.10E-08 |
| 6h  | 3.29E-06  | 7.73E-06 | 2.09E-06 | 3.25E-06 |
| 12h | 7.83E-07  | 3.57E-06 | 5.46E-07 | 1.51E-06 |
| 24h | 1.15E-06  | 3.27E-06 | 1.19E-06 | 1.46E-07 |
| 36h | 5.52E-07  | 1.10E-06 | 6.63E-07 | 1.12E-06 |
| 48h | 4.50E-07  | 5.31E-07 | 2.65E-07 | 8.44E-07 |

|     |           |          |          |          |
|-----|-----------|----------|----------|----------|
| 72h | 6.54E-08  | 3.02E-07 | 6.54E-08 | 4.71E-07 |
|     | cgd6_3230 |          |          |          |
| 2h  | 1.23E-05  | 1.00E-05 | 6.80E-06 | 2.24E-05 |
| 6h  | 6.03E-06  | 1.40E-05 | 2.38E-06 | 4.86E-06 |
| 12h | 4.92E-06  | 2.11E-05 | 1.43E-05 | 1.83E-05 |
| 24h | 2.50E-05  | 5.75E-05 | 1.16E-05 | 1.01E-06 |
| 36h | 2.34E-06  | 1.21E-05 | 5.54E-06 | 6.93E-06 |
| 48h | 2.01E-06  | 1.70E-06 | 1.38E-06 | 3.22E-06 |
| 72h | 5.43E-07  | 2.11E-06 | 9.71E-07 | 3.16E-06 |
|     | cgd6_3240 |          |          |          |
| 2h  | 0.00E+00  | 5.27E-07 | 0.00E+00 | 0.00E+00 |
| 6h  | 3.77E-05  | 7.83E-05 | 5.53E-06 | 2.67E-05 |
| 12h | 1.64E-07  | 2.98E-07 | 2.24E-07 | 5.84E-07 |
| 24h | 6.31E-06  | 2.89E-05 | 9.54E-06 | 1.83E-06 |
| 36h | 1.16E-05  | 2.89E-05 | 2.56E-06 | 6.85E-06 |
| 48h | 1.47E-05  | 9.50E-06 | 6.04E-07 | 1.02E-05 |
| 72h | 2.21E-06  | 7.65E-06 | 6.44E-07 | 6.31E-06 |
|     | cgd6_3250 |          |          |          |
| 2h  | 2.04E-09  | 0.00E+00 | 0.00E+00 | 0.00E+00 |
| 6h  | 3.18E-07  | 1.09E-06 | 2.02E-07 | 4.33E-07 |
| 12h | 1.04E-08  | 2.78E-07 | 3.36E-08 | 2.77E-08 |
| 24h | 3.77E-08  | 1.36E-07 | 4.72E-07 | 3.98E-08 |
| 36h | 1.69E-07  | 6.95E-07 | 2.97E-07 | 5.86E-07 |
| 48h | 1.34E-07  | 7.29E-08 | 1.04E-07 | 1.46E-07 |
| 72h | 4.87E-08  | 1.51E-07 | 4.11E-08 | 1.66E-07 |
|     | cgd6_3260 |          |          |          |
| 2h  | 4.71E-09  | 1.64E-09 | 0.00E+00 | 0.00E+00 |
| 6h  | 9.77E-09  | 1.75E-07 | 3.06E-08 | 5.21E-09 |
| 12h | 9.73E-09  | 4.81E-08 | 4.06E-08 | 2.32E-08 |
| 24h | 5.27E-08  | 7.51E-08 | 2.01E-07 | 1.11E-08 |
| 36h | 3.91E-07  | 6.95E-07 | 2.25E-07 | 4.79E-07 |
| 48h | 2.38E-07  | 2.46E-07 | 0.00E+00 | 1.50E-07 |
| 72h | 8.75E-08  | 1.21E-07 | 6.52E-08 | 7.31E-07 |
|     | cgd6_3270 |          |          |          |
| 2h  | 3.35E-07  | 0.00E+00 | 0.00E+00 | 8.44E-07 |
| 6h  | 7.29E-06  | 5.06E-05 | 2.75E-06 | 7.19E-06 |
| 12h | 5.81E-07  | 1.69E-06 | 1.89E-06 | 6.20E-07 |
| 24h | 1.07E-05  | 2.31E-05 | 7.13E-06 | 1.20E-06 |
| 36h | 1.52E-05  | 3.30E-05 | 4.40E-06 | 2.03E-05 |
| 48h | 9.06E-05  | 2.06E-05 | 4.28E-06 | 2.73E-05 |
| 72h | 2.13E-04  | 1.25E-04 | 4.99E-05 | 2.72E-04 |
|     | cgd6_3280 |          |          |          |
| 2h  | 5.98E-06  | 1.13E-06 | 3.52E-06 | 5.65E-06 |
| 6h  | 4.60E-05  | 2.63E-04 | 3.93E-05 | 1.55E-04 |
| 12h | 8.10E-05  | 1.09E-04 | 9.35E-06 | 4.22E-05 |
| 24h | 8.26E-05  | 1.51E-04 | 4.41E-05 | 1.05E-05 |
| 36h | 4.20E-04  | 5.56E-04 | 1.24E-04 | 3.73E-04 |
| 48h | 1.03E-03  | 2.56E-03 | 4.73E-04 | 3.24E-03 |
| 72h | 8.68E-04  | 7.38E-03 | 5.88E-04 | 3.19E-03 |
|     | cgd6_3290 |          |          |          |
| 2h  | 5.43E-04  | 7.63E-05 | 2.04E-05 | 2.47E-04 |
| 6h  | 1.23E-04  | 3.22E-04 | 7.31E-06 | 1.48E-04 |
| 12h | 2.83E-05  | 5.73E-05 | 2.85E-05 | 9.43E-05 |

|     |           |          |          |          |
|-----|-----------|----------|----------|----------|
| 24h | 3.73E-04  | 6.09E-04 | 4.01E-05 | 1.35E-05 |
| 36h | 7.66E-05  | 1.29E-04 | 2.82E-05 | 7.49E-05 |
| 48h | 5.42E-05  | 2.02E-05 | 1.00E-05 | 7.05E-05 |
| 72h | 3.04E-05  | 5.82E-05 | 8.05E-06 | 3.17E-05 |
|     | cgd6_3300 |          |          |          |
| 2h  | 4.44E-06  | 3.85E-06 | 5.65E-07 | 5.06E-06 |
| 6h  | 4.97E-06  | 2.02E-05 | 5.70E-07 | 4.29E-06 |
| 12h | 3.66E-07  | 4.97E-07 | 3.39E-07 | 1.86E-06 |
| 24h | 1.95E-06  | 3.98E-06 | 7.97E-07 | 2.90E-07 |
| 36h | 1.07E-06  | 4.16E-06 | 3.46E-07 | 1.64E-06 |
| 48h | 8.49E-07  | 7.51E-07 | 3.53E-07 | 1.22E-06 |
| 72h | 2.89E-07  | 8.68E-07 | 5.63E-08 | 3.29E-07 |
|     | cgd6_3310 |          |          |          |
| 2h  | 5.83E-06  | 5.18E-06 | 1.09E-07 | 6.29E-06 |
| 6h  | 3.08E-06  | 8.44E-06 | 6.49E-07 | 1.17E-05 |
| 12h | 8.43E-08  | 1.47E-06 | 3.55E-08 | 2.50E-07 |
| 24h | 3.45E-07  | 8.99E-07 | 6.07E-07 | 8.72E-08 |
| 36h | 1.22E-06  | 2.42E-06 | 3.59E-07 | 1.19E-06 |
| 48h | 3.60E-07  | 4.90E-07 | 1.51E-07 | 9.04E-07 |
| 72h | 9.94E-08  | 8.51E-07 | 1.28E-07 | 4.97E-07 |
|     | cgd6_3330 |          |          |          |
| 2h  | 7.19E-05  | 7.05E-05 | 0.00E+00 | 7.61E-04 |
| 6h  | 6.87E-05  | 4.23E-04 | 3.97E-06 | 1.26E-04 |
| 12h | 1.80E-05  | 0.00E+00 | 4.85E-06 | 8.81E-05 |
| 24h | 3.86E-05  | 5.33E-05 | 5.26E-05 | 3.10E-05 |
| 36h | 4.91E-05  | 1.19E-04 | 8.75E-05 | 3.01E-05 |
| 48h | 3.23E-05  | 2.74E-04 | 1.50E-04 | 7.96E-05 |
| 72h | 1.24E-05  | 1.42E-04 | 4.09E-05 | 6.44E-04 |
|     | cgd6_3350 |          |          |          |
| 2h  | 0.00E+00  | 0.00E+00 | 0.00E+00 | 0.00E+00 |
| 6h  | 0.00E+00  | 1.09E-08 | 2.73E-08 | 3.24E-09 |
| 12h | 0.00E+00  | 0.00E+00 | 1.44E-08 | 0.00E+00 |
| 24h | 0.00E+00  | 4.09E-09 | 9.38E-09 | 1.59E-08 |
| 36h | 1.19E-08  | 2.25E-08 | 3.18E-09 | 1.80E-08 |
| 48h | 2.19E-07  | 8.61E-08 | 9.14E-08 | 5.24E-08 |
| 72h | 1.24E-08  | 5.49E-09 | 1.88E-08 | 9.78E-09 |
|     | cgd6_3370 |          |          |          |
| 2h  | 7.05E-05  | 2.56E-05 | 1.37E-05 | 1.22E-05 |
| 6h  | 1.52E-05  | 2.01E-05 | 8.31E-06 | 1.69E-05 |
| 12h | 8.83E-06  | 3.38E-06 | 2.45E-05 | 8.64E-06 |
| 24h | 5.44E-05  | 4.61E-05 | 1.50E-05 | 8.94E-06 |
| 36h | 1.02E-04  | 8.11E-06 | 5.16E-06 | 2.31E-06 |
| 48h | 1.81E-05  | 2.18E-06 | 7.94E-06 | 2.27E-06 |
| 72h | 5.40E-06  | 1.97E-06 | 3.08E-06 | 1.33E-06 |
|     | cgd6_3380 |          |          |          |
| 2h  | 1.44E-03  | 6.38E-04 | 1.82E-04 | 2.48E-04 |
| 6h  | 6.38E-04  | 5.32E-04 | 4.57E-04 | 4.47E-04 |
| 12h | 2.19E-04  | 1.37E-04 | 5.53E-04 | 1.07E-04 |
| 24h | 5.79E-04  | 3.85E-04 | 5.07E-04 | 2.55E-04 |
| 36h | 2.68E-04  | 1.85E-04 | 1.55E-04 | 3.48E-05 |
| 48h | 1.45E-04  | 3.85E-05 | 1.07E-04 | 3.68E-05 |
| 72h | 9.05E-05  | 2.17E-05 | 3.20E-05 | 2.35E-05 |
|     | cgd6_3390 |          |          |          |

|     |           |          |          |          |
|-----|-----------|----------|----------|----------|
| 2h  | 1.69E-07  | 2.15E-08 | 0.00E+00 | 3.04E-09 |
| 6h  | 0.00E+00  | 0.00E+00 | 2.25E-08 | 3.09E-09 |
| 12h | 2.68E-07  | 1.13E-07 | 2.10E-06 | 6.84E-07 |
| 24h | 1.33E-06  | 2.57E-07 | 7.70E-07 | 2.00E-07 |
| 36h | 7.99E-07  | 1.45E-06 | 3.13E-06 | 1.40E-06 |
| 48h | 2.74E-06  | 1.04E-06 | 1.75E-06 | 1.11E-06 |
| 72h | 5.47E-06  | 1.19E-06 | 6.25E-06 | 3.65E-06 |
|     | cgd6_3400 |          |          |          |
| 2h  | 7.62E-07  | 5.29E-07 | 2.25E-07 | 4.08E-07 |
| 6h  | 4.69E-07  | 8.27E-07 | 4.15E-06 | 7.25E-07 |
| 12h | 1.32E-07  | 9.97E-07 | 8.31E-05 | 6.07E-07 |
| 24h | 4.04E-07  | 8.52E-07 | 1.24E-06 | 6.98E-07 |
| 36h | 3.26E-07  | 2.74E-06 | 2.44E-06 | 1.16E-06 |
| 48h | 1.89E-06  | 6.14E-07 | 1.57E-06 | 1.00E-06 |
| 72h | 1.79E-06  | 9.46E-07 | 2.85E-06 | 2.03E-06 |
|     | cgd6_3410 |          |          |          |
| 2h  | 2.36E-08  | 3.89E-08 | 0.00E+00 | 8.64E-09 |
| 6h  | 1.13E-08  | 4.44E-08 | 2.13E-07 | 3.03E-07 |
| 12h | 2.73E-08  | 9.76E-08 | 1.22E-07 | 6.32E-08 |
| 24h | 7.66E-08  | 5.70E-08 | 1.16E-07 | 1.54E-07 |
| 36h | 8.14E-08  | 3.71E-07 | 3.04E-07 | 1.74E-07 |
| 48h | 1.18E-07  | 1.37E-07 | 9.37E-08 | 9.49E-08 |
| 72h | 7.31E-08  | 3.88E-08 | 1.55E-07 | 5.88E-08 |
|     | cgd6_3420 |          |          |          |
| 2h  | 9.66E-07  | 1.00E-06 | 8.30E-08 | 8.47E-08 |
| 6h  | 9.63E-06  | 1.17E-06 | 2.71E-06 | 1.70E-06 |
| 12h | 7.95E-09  | 6.77E-07 | 2.53E-07 | 5.94E-08 |
| 24h | 1.38E-07  | 4.94E-07 | 6.23E-07 | 6.81E-07 |
| 36h | 2.44E-07  | 7.18E-07 | 3.34E-07 | 2.46E-07 |
| 48h | 2.33E-07  | 2.87E-07 | 2.39E-07 | 1.20E-07 |
| 72h | 1.40E-07  | 1.04E-07 | 1.07E-07 | 8.47E-08 |
|     | cgd6_3510 |          |          |          |
| 2h  | 1.36E-08  | 3.13E-08 | 1.86E-08 | 3.85E-08 |
| 6h  | 3.64E-09  | 3.44E-08 | 1.73E-07 | 6.66E-07 |
| 12h | 2.68E-05  | 8.01E-05 | 2.37E-05 | 7.66E-06 |
| 24h | 1.56E-06  | 2.46E-06 | 9.34E-07 | 5.41E-07 |
| 36h | 7.17E-07  | 1.22E-06 | 5.73E-06 | 1.59E-06 |
| 48h | 8.31E-07  | 3.45E-07 | 3.11E-07 | 1.41E-07 |
| 72h | 2.62E-07  | 1.07E-07 | 2.25E-07 | 1.38E-07 |
|     | cgd6_3520 |          |          |          |
| 2h  | 3.04E-05  | 4.86E-06 | 2.30E-06 | 3.95E-06 |
| 6h  | 5.83E-06  | 6.56E-06 | 1.16E-05 | 9.59E-06 |
| 12h | 7.17E-06  | 6.77E-06 | 3.35E-05 | 8.64E-06 |
| 24h | 5.24E-06  | 7.65E-06 | 1.29E-05 | 7.07E-06 |
| 36h | 4.14E-06  | 8.39E-06 | 1.50E-05 | 3.68E-06 |
| 48h | 2.94E-06  | 2.53E-06 | 4.49E-06 | 1.91E-06 |
| 72h | 1.09E-06  | 3.71E-07 | 2.05E-06 | 8.95E-07 |
|     | cgd6_3550 |          |          |          |
| 2h  | 1.15E-04  | 7.20E-04 | 4.39E-03 | 4.77E-03 |
| 6h  | 1.04E-04  | 1.93E-03 | 1.04E-03 | 1.54E-03 |
| 12h | 2.37E-05  | 9.35E-04 | 1.40E-03 | 5.51E-04 |
| 24h | 5.23E-05  | 3.58E-04 | 7.50E-04 | 1.70E-04 |
| 36h | 1.96E-05  | 6.22E-04 | 8.55E-04 | 1.16E-03 |



|     |           |          |          |          |
|-----|-----------|----------|----------|----------|
| 48h | 3.83E-05  | 9.17E-05 | 1.07E-03 | 8.47E-04 |
| 72h | 5.85E-05  | 3.44E-04 | 1.53E-03 | 1.05E-04 |
|     | cgd6_3560 |          |          |          |
| 2h  | 1.02E-03  | 1.24E-03 | 1.09E-03 | 4.04E-04 |
| 6h  | 1.01E-04  | 6.34E-04 | 6.29E-04 | 2.94E-04 |
| 12h | 8.31E-05  | 1.92E-04 | 1.10E-03 | 2.28E-04 |
| 24h | 3.35E-04  | 4.82E-04 | 3.47E-04 | 1.71E-04 |
| 36h | 8.01E-05  | 1.09E-03 | 2.78E-04 | 7.43E-05 |
| 48h | 6.39E-05  | 1.79E-04 | 2.02E-04 | 7.83E-05 |
| 72h | 1.44E-04  | 9.49E-05 | 3.81E-04 | 9.13E-05 |
|     | cgd6_3570 |          |          |          |
| 2h  | 1.02E-05  | 6.02E-06 | 5.49E-06 | 6.25E-06 |
| 6h  | 2.74E-07  | 1.12E-06 | 3.39E-07 | 2.80E-07 |
| 12h | 2.89E-05  | 4.79E-07 | 2.15E-05 | 1.09E-06 |
| 24h | 1.01E-06  | 1.39E-06 | 1.81E-06 | 1.15E-06 |
| 36h | 2.62E-06  | 1.84E-06 | 1.97E-06 | 5.35E-07 |
| 48h | 1.91E-06  | 6.00E-07 | 2.02E-06 | 5.66E-07 |
| 72h | 2.18E-04  | 8.44E-07 | 6.73E-06 | 1.86E-05 |
|     | cgd6_5490 |          |          |          |
| 2h  | 4.77E-08  | 0.00E+00 | 0.00E+00 | 0.00E+00 |
| 6h  | 2.17E-05  | 1.70E-06 | 4.74E-07 | 2.62E-08 |
| 12h | 2.37E-06  | 4.63E-06 | 6.10E-08 | 1.59E-07 |
| 24h | 2.76E-06  | 6.78E-07 | 2.16E-07 | 7.61E-07 |
| 36h | 3.18E-06  | 1.25E-06 | 2.57E-07 | 1.41E-06 |
| 48h | 4.39E-06  | 2.19E-06 | 1.36E-07 | 9.77E-07 |
| 72h | 4.46E-07  | 1.08E-08 | 2.48E-08 | 1.08E-08 |
|     | cgd6_5460 |          |          |          |
| 2h  | 0.00E+00  | 0.00E+00 | 0.00E+00 | 0.00E+00 |
| 6h  | 0.00E+00  | 1.49E-08 | 2.33E-10 | 1.18E-08 |
| 12h | 1.15E-04  | 3.50E-05 | 1.06E-05 | 1.57E-05 |
| 24h | 2.66E-05  | 7.10E-06 | 4.52E-07 | 3.34E-06 |
| 36h | 1.62E-05  | 2.47E-06 | 1.92E-06 | 7.91E-06 |
| 48h | 7.48E-07  | 4.35E-07 | 4.80E-08 | 1.26E-07 |
| 72h | 4.90E-08  | 3.92E-08 | 9.34E-10 | 0.00E+00 |
|     | cgd7_80   |          |          |          |
| 2h  | 7.59E-09  | 7.96E-07 | 1.25E-07 | 1.11E-06 |
| 6h  | 1.27E-06  | 8.64E-08 | 5.44E-06 | 3.26E-06 |
| 12h | 5.92E-07  | 1.44E-06 | 3.53E-06 | 1.27E-08 |
| 24h | 2.93E-06  | 3.42E-06 | 3.10E-06 | 1.07E-06 |
| 36h | 5.99E-07  | 1.81E-06 | 1.35E-06 | 1.48E-06 |
| 48h | 4.49E-06  | 7.95E-06 | 2.34E-06 | 3.93E-06 |
| 72h | 1.59E-06  | 2.51E-06 | 8.32E-07 | 1.95E-06 |
|     | cgd6_3590 |          |          |          |
| 2h  | 0.00E+00  | 0.00E+00 | 0.00E+00 | 0.00E+00 |
| 6h  | 1.99E-06  | 1.78E-06 | 6.26E-06 | 2.34E-04 |
| 12h | 4.23E-08  | 2.40E-07 | 5.80E-08 | 6.15E-07 |
| 24h | 9.54E-07  | 6.09E-07 | 2.22E-06 | 1.97E-05 |
| 36h | 4.36E-06  | 3.55E-06 | 1.58E-06 | 9.95E-06 |
| 48h | 5.24E-06  | 2.13E-06 | 2.00E-06 | 1.76E-05 |
| 72h | 5.52E-06  | 2.78E-06 | 4.04E-06 | 5.03E-06 |
|     | cgd6_3610 |          |          |          |
| 2h  | 2.41E-06  | 4.65E-06 | 7.38E-07 | 6.35E-06 |
| 6h  | 3.05E-06  | 1.60E-06 | 8.86E-07 | 3.23E-06 |

|     |           |          |          |          |
|-----|-----------|----------|----------|----------|
| 12h | 8.20E-07  | 9.90E-07 | 1.98E-06 | 5.52E-06 |
| 24h | 8.11E-06  | 3.61E-06 | 1.65E-06 | 5.79E-06 |
| 36h | 1.04E-06  | 1.07E-06 | 1.15E-06 | 2.36E-06 |
| 48h | 2.53E-06  | 8.18E-07 | 1.21E-06 | 2.94E-06 |
| 72h | 2.63E-06  | 2.16E-06 | 3.91E-06 | 9.45E-06 |
|     | cgd6_3620 |          |          |          |
| 2h  | 9.19E-06  | 8.67E-06 | 6.62E-06 | 2.21E-05 |
| 6h  | 3.42E-06  | 4.96E-06 | 3.35E-06 | 7.78E-06 |
| 12h | 6.56E-06  | 4.41E-06 | 9.38E-06 | 2.48E-05 |
| 24h | 1.05E-05  | 8.09E-06 | 7.14E-06 | 1.46E-05 |
| 36h | 5.11E-06  | 4.16E-06 | 1.06E-05 | 1.51E-05 |
| 48h | 6.93E-06  | 3.83E-06 | 2.22E-06 | 7.48E-06 |
| 72h | 4.55E-06  | 3.65E-06 | 8.77E-06 | 1.64E-05 |
|     | cgd6_3640 |          |          |          |
| 2h  | 0.00E+00  | 0.00E+00 | 0.00E+00 | 0.00E+00 |
| 6h  | 0.00E+00  | 3.32E-08 | 4.93E-08 | 6.51E-07 |
| 12h | 5.69E-07  | 1.04E-06 | 6.96E-07 | 6.54E-06 |
| 24h | 6.95E-07  | 1.03E-06 | 1.40E-06 | 5.52E-05 |
| 36h | 2.17E-06  | 2.04E-06 | 3.80E-06 | 1.45E-05 |
| 48h | 2.73E-06  | 6.12E-07 | 5.46E-07 | 3.07E-06 |
| 72h | 1.24E-06  | 1.03E-06 | 2.16E-06 | 3.17E-06 |
|     | cgd6_3650 |          |          |          |
| 2h  | 5.91E-07  | 0.00E+00 | 0.00E+00 | 8.50E-08 |
| 6h  | 2.55E-06  | 2.84E-06 | 1.95E-06 | 1.31E-05 |
| 12h | 8.74E-07  | 5.55E-06 | 3.80E-06 | 1.78E-05 |
| 24h | 1.04E-05  | 1.07E-05 | 2.24E-05 | 4.90E-05 |
| 36h | 3.02E-05  | 2.39E-05 | 3.18E-05 | 1.23E-04 |
| 48h | 1.57E-05  | 9.38E-06 | 4.87E-06 | 6.18E-05 |
| 72h | 3.54E-05  | 1.78E-05 | 7.28E-05 | 9.55E-05 |
|     | cgd6_3660 |          |          |          |
| 2h  | 1.70E-07  | 1.83E-07 | 0.00E+00 | 0.00E+00 |
| 6h  | 1.61E-06  | 2.56E-07 | 4.90E-07 | 8.25E-07 |
| 12h | 4.04E-06  | 5.54E-06 | 2.96E-06 | 2.35E-06 |
| 24h | 1.00E-06  | 7.23E-07 | 6.32E-07 | 1.86E-06 |
| 36h | 2.19E-06  | 2.81E-06 | 3.58E-06 | 3.12E-06 |
| 48h | 1.15E-06  | 5.47E-07 | 5.70E-07 | 1.67E-06 |
| 72h | 1.51E-06  | 9.70E-07 | 1.28E-06 | 1.71E-06 |
|     | cgd6_3680 |          |          |          |
| 2h  | 0.00E+00  | 0.00E+00 | 0.00E+00 | 0.00E+00 |
| 6h  | 0.00E+00  | 0.00E+00 | 1.68E-08 | 0.00E+00 |
| 12h | 3.88E-05  | 6.84E-05 | 3.12E-05 | 1.05E-04 |
| 24h | 1.26E-05  | 9.43E-06 | 6.67E-06 | 3.95E-05 |
| 36h | 1.35E-05  | 1.13E-05 | 1.97E-05 | 5.02E-05 |
| 48h | 7.30E-06  | 2.89E-06 | 4.78E-06 | 4.57E-05 |
| 72h | 2.41E-06  | 2.67E-06 | 6.66E-06 | 1.14E-05 |
|     | cgd6_3690 |          |          |          |
| 2h  | 4.36E-08  | 3.47E-08 | 7.69E-08 | 0.00E+00 |
| 6h  | 4.42E-07  | 1.33E-06 | 5.47E-07 | 1.51E-05 |
| 12h | 1.79E-07  | 1.14E-07 | 5.59E-07 | 4.78E-06 |
| 24h | 7.50E-07  | 8.27E-07 | 5.89E-07 | 1.18E-05 |
| 36h | 1.67E-06  | 2.66E-06 | 5.22E-06 | 2.04E-05 |
| 48h | 5.01E-06  | 4.68E-07 | 1.03E-06 | 1.12E-05 |
| 72h | 7.10E-07  | 9.53E-07 | 2.61E-06 | 3.92E-05 |

|     |           |          |          |          |
|-----|-----------|----------|----------|----------|
|     | cgd6_3710 |          |          |          |
| 2h  | 5.89E-04  | 7.71E-04 | 2.13E-03 | 1.42E-03 |
| 6h  | 2.50E-03  | 1.10E-03 | 2.40E-03 | 4.10E-03 |
| 12h | 6.42E-04  | 4.06E-04 | 1.90E-03 | 2.56E-03 |
| 24h | 1.29E-03  | 8.90E-04 | 1.30E-03 | 5.44E-03 |
| 36h | 6.95E-04  | 3.22E-04 | 7.07E-04 | 1.04E-03 |
| 48h | 4.51E-04  | 2.31E-04 | 2.27E-04 | 9.33E-04 |
| 72h | 4.19E-05  | 2.20E-05 | 7.34E-05 | 5.05E-04 |
|     | cgd6_3720 |          |          |          |
| 2h  | 4.23E-05  | 1.02E-04 | 0.00E+00 | 1.28E-04 |
| 6h  | 1.13E-04  | 1.24E-04 | 8.43E-06 | 4.72E-06 |
| 12h | 1.18E-05  | 2.94E-05 | 5.20E-05 | 9.56E-04 |
| 24h | 8.42E-05  | 8.07E-06 | 1.68E-04 | 8.84E-04 |
| 36h | 5.81E-05  | 4.37E-05 | 1.05E-04 | 4.46E-04 |
| 48h | 3.33E-04  | 1.07E-04 | 9.22E-05 | 3.34E-04 |
| 72h | 3.61E-05  | 4.75E-05 | 2.00E-04 | 1.21E-03 |
|     | cgd6_3730 |          |          |          |
| 2h  | 4.12E-08  | 4.34E-08 | 1.10E-07 | 1.99E-08 |
| 6h  | 2.62E-08  | 1.30E-08 | 7.52E-09 | 4.85E-09 |
| 12h | 1.87E-08  | 6.62E-09 | 1.06E-08 | 2.55E-08 |
| 24h | 9.86E-08  | 2.46E-08 | 5.07E-08 | 2.18E-08 |
| 36h | 1.67E-07  | 1.86E-07 | 1.18E-07 | 1.48E-07 |
| 48h | 6.81E-06  | 2.34E-06 | 1.44E-06 | 2.10E-06 |
| 72h | 2.95E-06  | 2.03E-06 | 4.34E-06 | 3.33E-06 |
|     | cgd6_3750 |          |          |          |
| 2h  | 1.07E-06  | 0.00E+00 | 7.53E-07 | 1.12E-04 |
| 6h  | 0.00E+00  | 3.50E-08 | 0.00E+00 | 4.21E-06 |
| 12h | 2.85E-07  | 1.66E-07 | 1.31E-06 | 8.47E-06 |
| 24h | 7.96E-06  | 3.72E-06 | 2.65E-06 | 1.31E-04 |
| 36h | 2.01E-05  | 1.02E-05 | 7.00E-05 | 2.60E-04 |
| 48h | 7.61E-05  | 1.48E-05 | 4.45E-04 | 1.66E-03 |
| 72h | 2.37E-04  | 3.57E-05 | 2.53E-03 | 6.34E-04 |
|     | cgd6_4680 |          |          |          |
| 2h  | 1.18E-05  | 1.38E-06 | 7.41E-08 | 5.61E-07 |
| 6h  | 1.40E-06  | 5.65E-07 | 6.54E-07 | 1.21E-06 |
| 12h | 8.09E-07  | 4.46E-06 | 2.19E-07 | 1.61E-07 |
| 24h | 5.23E-07  | 5.67E-07 | 1.01E-06 | 2.08E-06 |
| 36h | 3.14E-07  | 2.69E-07 | 6.95E-07 | 7.99E-07 |
| 48h | 4.79E-07  | 4.39E-07 | 5.48E-07 | 8.32E-07 |
| 72h | 1.20E-06  | 9.71E-08 | 6.20E-07 | 1.01E-06 |
|     | cgd6_4700 |          |          |          |
| 2h  | 1.91E-07  | 3.35E-07 | 7.52E-09 | 4.23E-08 |
| 6h  | 2.98E-08  | 0.00E+00 | 0.00E+00 | 2.43E-09 |
| 12h | 4.96E-07  | 4.20E-07 | 6.35E-07 | 4.20E-07 |
| 24h | 4.18E-07  | 5.61E-07 | 1.51E-07 | 1.59E-07 |
| 36h | 5.21E-07  | 5.05E-07 | 1.17E-06 | 1.08E-06 |
| 48h | 3.28E-07  | 3.03E-07 | 3.51E-07 | 3.07E-07 |
| 72h | 1.23E-06  | 5.28E-07 | 4.48E-07 | 1.68E-06 |
|     | cgd6_4710 |          |          |          |
| 2h  | 3.96E-04  | 7.44E-05 | 1.77E-05 | 1.89E-04 |
| 6h  | 1.90E-05  | 1.59E-05 | 4.67E-06 | 1.82E-05 |
| 12h | 1.46E-04  | 5.43E-06 | 6.16E-05 | 9.70E-05 |
| 24h | 1.86E-04  | 1.08E-04 | 7.38E-05 | 5.74E-05 |

|     |           |          |          |          |
|-----|-----------|----------|----------|----------|
| 36h | 2.95E-05  | 1.64E-05 | 4.77E-05 | 5.14E-05 |
| 48h | 2.36E-05  | 5.43E-06 | 1.22E-05 | 1.98E-05 |
| 72h | 1.17E-05  | 1.73E-06 | 6.72E-06 | 1.38E-05 |
|     | cgd6_4720 |          |          |          |
| 2h  | 2.19E-06  | 2.64E-06 | 3.60E-07 | 5.52E-07 |
| 6h  | 3.95E-07  | 8.46E-07 | 3.21E-07 | 5.93E-07 |
| 12h | 6.00E-07  | 3.98E-07 | 1.16E-06 | 5.84E-07 |
| 24h | 4.10E-07  | 5.41E-07 | 3.58E-07 | 5.60E-07 |
| 36h | 5.90E-07  | 3.14E-07 | 3.71E-07 | 3.90E-07 |
| 48h | 1.75E-07  | 1.53E-07 | 2.01E-07 | 1.20E-07 |
| 72h | 1.34E-07  | 7.79E-08 | 1.33E-07 | 1.38E-07 |
|     | cgd6_4730 |          |          |          |
| 2h  | 0.00E+00  | 0.00E+00 | 0.00E+00 | 0.00E+00 |
| 6h  | 0.00E+00  | 0.00E+00 | 0.00E+00 | 5.61E-09 |
| 12h | 1.30E-06  | 1.03E-07 | 3.86E-07 | 5.35E-07 |
| 24h | 1.50E-07  | 3.34E-08 | 2.02E-07 | 1.63E-07 |
| 36h | 1.17E-06  | 6.52E-07 | 1.49E-06 | 1.04E-06 |
| 48h | 1.46E-07  | 8.78E-08 | 1.88E-07 | 1.25E-07 |
| 72h | 6.04E-07  | 8.81E-08 | 5.59E-07 | 5.33E-07 |
|     | cgd6_4740 |          |          |          |
| 2h  | 4.70E-04  | 1.80E-05 | 2.56E-05 | 1.97E-04 |
| 6h  | 1.28E-04  | 9.59E-06 | 1.69E-05 | 9.62E-05 |
| 12h | 3.45E-04  | 4.05E-05 | 6.81E-05 | 3.17E-04 |
| 24h | 2.22E-04  | 8.16E-05 | 5.88E-05 | 1.68E-04 |
| 36h | 2.85E-04  | 4.24E-05 | 1.12E-04 | 1.57E-04 |
| 48h | 1.45E-04  | 1.42E-05 | 6.73E-05 | 5.83E-05 |
| 72h | 5.98E-05  | 1.95E-05 | 3.51E-05 | 4.58E-05 |
|     | cgd6_4750 |          |          |          |
| 2h  | 2.46E-07  | 1.15E-07 | 1.15E-08 | 2.52E-08 |
| 6h  | 5.46E-07  | 1.78E-06 | 7.65E-07 | 3.22E-06 |
| 12h | 7.56E-08  | 2.18E-08 | 9.97E-08 | 1.24E-07 |
| 24h | 2.82E-07  | 1.42E-07 | 2.64E-06 | 1.34E-06 |
| 36h | 1.54E-06  | 3.30E-07 | 3.58E-07 | 6.40E-07 |
| 48h | 4.27E-07  | 3.69E-07 | 3.67E-07 | 3.50E-07 |
| 72h | 2.84E-07  | 9.03E-08 | 1.73E-07 | 8.94E-07 |
|     | cgd6_4760 |          |          |          |
| 2h  | 0.00E+00  | 0.00E+00 | 0.00E+00 | 7.98E-10 |
| 6h  | 5.27E-07  | 8.87E-07 | 2.18E-06 | 4.18E-07 |
| 12h | 1.35E-05  | 3.17E-06 | 4.69E-06 | 3.25E-06 |
| 24h | 1.93E-06  | 1.68E-06 | 8.42E-06 | 3.08E-06 |
| 36h | 1.14E-05  | 4.06E-06 | 1.34E-05 | 1.07E-05 |
| 48h | 1.57E-05  | 1.05E-05 | 1.72E-05 | 2.75E-06 |
| 72h | 3.50E-06  | 1.30E-06 | 4.89E-06 | 6.47E-06 |
|     | cgd6_4770 |          |          |          |
| 2h  | 9.33E-06  | 3.94E-06 | 4.52E-06 | 1.43E-06 |
| 6h  | 3.51E-06  | 2.86E-06 | 1.96E-06 | 6.16E-06 |
| 12h | 1.41E-06  | 4.48E-07 | 3.50E-06 | 2.90E-06 |
| 24h | 3.64E-06  | 2.34E-06 | 6.74E-06 | 5.36E-06 |
| 36h | 2.85E-06  | 4.77E-06 | 3.03E-06 | 1.54E-06 |
| 48h | 2.64E-06  | 6.63E-07 | 1.73E-06 | 1.60E-06 |
| 72h | 6.29E-07  | 6.94E-07 | 6.73E-07 | 9.51E-07 |
|     | cgd6_4780 |          |          |          |
| 2h  | 9.84E-04  | 9.94E-04 | 6.29E-05 | 2.85E-04 |

|           |          |          |          |          |
|-----------|----------|----------|----------|----------|
| 6h        | 9.80E-04 | 4.58E-05 | 1.50E-04 | 5.77E-04 |
| 12h       | 3.25E-04 | 2.15E-05 | 1.49E-04 | 5.01E-04 |
| 24h       | 6.11E-04 | 7.39E-05 | 3.37E-04 | 6.51E-04 |
| 36h       | 3.50E-04 | 8.45E-05 | 1.63E-04 | 2.87E-04 |
| 48h       | 1.70E-04 | 7.75E-05 | 2.40E-04 | 3.51E-04 |
| 72h       | 7.32E-05 | 7.30E-06 | 2.29E-05 | 1.44E-04 |
| cgd6_4790 |          |          |          |          |
| 2h        | 0.00E+00 | 2.06E-08 | 0.00E+00 | 1.04E-08 |
| 6h        | 0.00E+00 | 0.00E+00 | 0.00E+00 | 0.00E+00 |
| 12h       | 8.42E-06 | 6.04E-06 | 2.61E-06 | 3.56E-06 |
| 24h       | 2.43E-06 | 2.56E-06 | 1.55E-06 | 1.08E-06 |
| 36h       | 3.22E-06 | 6.72E-06 | 4.58E-06 | 5.30E-06 |
| 48h       | 4.93E-06 | 1.56E-06 | 2.58E-06 | 2.57E-06 |
| 72h       | 2.86E-06 | 6.37E-06 | 6.27E-06 | 1.79E-05 |
| cgd6_4800 |          |          |          |          |
| 2h        | 0.00E+00 | 3.19E-08 | 0.00E+00 | 0.00E+00 |
| 6h        | 0.00E+00 | 0.00E+00 | 8.60E-09 | 0.00E+00 |
| 12h       | 0.00E+00 | 0.00E+00 | 3.23E-08 | 1.30E-09 |
| 24h       | 8.04E-08 | 1.17E-08 | 7.15E-08 | 1.65E-07 |
| 36h       | 2.06E-07 | 2.39E-07 | 4.51E-07 | 2.46E-07 |
| 48h       | 2.36E-07 | 1.19E-07 | 5.04E-08 | 1.08E-07 |
| 72h       | 1.27E-06 | 1.38E-06 | 2.94E-06 | 3.46E-06 |
| cgd6_4810 |          |          |          |          |
| 2h        | 0.00E+00 | 0.00E+00 | 0.00E+00 | 0.00E+00 |
| 6h        | 0.00E+00 | 0.00E+00 | 0.00E+00 | 0.00E+00 |
| 12h       | 3.57E-07 | 0.00E+00 | 4.44E-08 | 1.35E-06 |
| 24h       | 4.48E-07 | 2.94E-06 | 1.01E-07 | 1.19E-06 |
| 36h       | 1.87E-06 | 6.75E-06 | 2.93E-06 | 3.11E-06 |
| 48h       | 6.83E-06 | 2.65E-05 | 7.99E-06 | 2.82E-06 |
| 72h       | 7.31E-06 | 1.97E-05 | 6.82E-05 | 8.94E-06 |
| cgd6_4840 |          |          |          |          |
| 2h        | 5.06E-10 | 0.00E+00 | 0.00E+00 | 0.00E+00 |
| 6h        | 0.00E+00 | 1.98E-09 | 0.00E+00 | 0.00E+00 |
| 12h       | 0.00E+00 | 0.00E+00 | 0.00E+00 | 0.00E+00 |
| 24h       | 4.37E-10 | 6.77E-10 | 2.92E-10 | 5.07E-09 |
| 36h       | 6.32E-09 | 2.14E-09 | 5.62E-10 | 5.60E-09 |
| 48h       | 3.99E-07 | 3.67E-07 | 3.14E-07 | 1.34E-06 |
| 72h       | 1.21E-06 | 4.42E-07 | 1.68E-06 | 3.34E-06 |
| cgd6_4850 |          |          |          |          |
| 2h        | 4.26E-07 | 3.38E-07 | 9.89E-08 | 0.00E+00 |
| 6h        | 2.21E-06 | 2.48E-06 | 1.59E-06 | 4.97E-07 |
| 12h       | 1.24E-08 | 3.31E-08 | 2.62E-08 | 1.36E-07 |
| 24h       | 1.71E-07 | 3.62E-07 | 4.83E-07 | 4.78E-07 |
| 36h       | 7.22E-07 | 4.74E-07 | 2.47E-07 | 1.37E-07 |
| 48h       | 1.68E-07 | 1.81E-07 | 1.06E-07 | 1.19E-07 |
| 72h       | 6.73E-07 | 8.61E-08 | 1.26E-07 | 6.63E-08 |
| cgd6_4870 |          |          |          |          |
| 2h        | 7.33E-09 | 3.71E-07 | 3.12E-07 | 4.36E-06 |
| 6h        | 0.00E+00 | 6.70E-08 | 3.57E-09 | 3.68E-08 |
| 12h       | 2.11E-06 | 9.53E-06 | 1.42E-06 | 3.94E-05 |
| 24h       | 7.73E-07 | 3.72E-06 | 6.74E-06 | 1.03E-05 |
| 36h       | 2.10E-06 | 3.94E-06 | 7.02E-06 | 4.10E-05 |
| 48h       | 3.53E-06 | 5.86E-06 | 7.91E-06 | 1.13E-04 |

|     |           |          |          |          |
|-----|-----------|----------|----------|----------|
| 72h | 8.52E-06  | 8.01E-06 | 8.61E-06 | 1.21E-04 |
|     | cgd6_4880 |          |          |          |
| 2h  | 0.00E+00  | 1.31E-08 | 2.44E-08 | 0.00E+00 |
| 6h  | 4.98E-09  | 0.00E+00 | 0.00E+00 | 0.00E+00 |
| 12h | 0.00E+00  | 0.00E+00 | 0.00E+00 | 0.00E+00 |
| 24h | 1.54E-08  | 4.43E-09 | 3.52E-09 | 1.29E-06 |
| 36h | 7.67E-08  | 3.45E-07 | 6.73E-08 | 6.30E-06 |
| 48h | 7.91E-06  | 1.07E-05 | 1.62E-05 | 3.47E-05 |
| 72h | 2.07E-05  | 1.25E-05 | 2.17E-05 | 1.41E-04 |
|     | cgd6_4900 |          |          |          |
| 2h  | 2.97E-07  | 1.41E-06 | 9.89E-07 | 7.51E-06 |
| 6h  | 8.82E-07  | 6.73E-06 | 2.55E-06 | 7.68E-06 |
| 12h | 7.95E-07  | 1.98E-06 | 5.22E-07 | 9.78E-06 |
| 24h | 5.31E-07  | 1.40E-06 | 1.91E-06 | 1.63E-05 |
| 36h | 9.57E-07  | 1.16E-06 | 7.26E-07 | 3.87E-06 |
| 48h | 3.05E-07  | 4.97E-07 | 5.13E-07 | 1.59E-05 |
| 72h | 6.45E-07  | 4.17E-07 | 5.75E-07 | 6.82E-06 |
|     | cgd6_4910 |          |          |          |
| 2h  | 6.22E-05  | 3.35E-05 | 3.14E-05 | 4.86E-05 |
| 6h  | 1.08E-05  | 3.52E-05 | 1.85E-05 | 3.26E-03 |
| 12h | 3.29E-05  | 9.76E-05 | 1.65E-05 | 7.60E-05 |
| 24h | 5.19E-05  | 3.65E-05 | 1.78E-05 | 3.03E-05 |
| 36h | 1.12E-05  | 2.10E-05 | 1.05E-05 | 1.72E-05 |
| 48h | 9.57E-06  | 1.80E-05 | 7.82E-06 | 1.35E-05 |
| 72h | 4.89E-06  | 2.44E-06 | 3.63E-06 | 1.31E-05 |
|     | cgd6_4920 |          |          |          |
| 2h  | 6.45E-04  | 4.11E-05 | 1.46E-02 | 7.58E-03 |
| 6h  | 1.13E-03  | 5.55E-05 | 3.23E-03 | 7.59E-01 |
| 12h | 3.77E-03  | 2.52E-05 | 3.87E-03 | 2.77E+00 |
| 24h | 3.17E-03  | 3.82E-05 | 1.54E-03 | 4.63E+00 |
| 36h | 3.38E-05  | 3.58E-05 | 2.02E-03 | 6.25E+00 |
| 48h | 9.38E-04  | 8.95E-06 | 1.24E-03 | 4.27E+00 |
| 72h | 1.39E-03  | 2.63E-05 | 6.56E-03 | 2.50E+00 |
|     | cgd6_4930 |          |          |          |
| 2h  | 0.00E+00  | 0.00E+00 | 0.00E+00 | 0.00E+00 |
| 6h  | 1.24E-07  | 1.19E-06 | 8.70E-07 | 1.28E-05 |
| 12h | 1.40E-08  | 7.30E-08 | 1.94E-07 | 2.91E-06 |
| 24h | 1.39E-07  | 3.03E-07 | 7.16E-07 | 2.91E-05 |
| 36h | 1.42E-06  | 1.07E-06 | 1.73E-06 | 1.30E-05 |
| 48h | 5.89E-07  | 4.94E-07 | 1.10E-06 | 3.96E-05 |
| 72h | 1.90E-07  | 1.81E-07 | 3.32E-07 | 2.01E-06 |
|     | cgd6_4940 |          |          |          |
| 2h  | 8.67E-09  | 0.00E+00 | 0.00E+00 | 0.00E+00 |
| 6h  | 1.41E-09  | 1.29E-08 | 2.97E-08 | 2.49E-07 |
| 12h | 3.92E-08  | 1.30E-07 | 1.32E-07 | 1.31E-06 |
| 24h | 4.19E-08  | 8.27E-08 | 3.30E-08 | 1.62E-06 |
| 36h | 1.94E-07  | 2.98E-07 | 5.31E-07 | 1.31E-06 |
| 48h | 1.03E-06  | 3.85E-07 | 7.20E-07 | 4.65E-06 |
| 72h | 4.91E-07  | 2.44E-07 | 7.55E-07 | 5.21E-06 |
|     | cgd6_4950 |          |          |          |
| 2h  | 0.00E+00  | 0.00E+00 | 2.19E-08 | 0.00E+00 |
| 6h  | 3.59E-09  | 0.00E+00 | 1.10E-09 | 0.00E+00 |
| 12h | 2.27E-07  | 1.08E-06 | 1.94E-07 | 2.29E-06 |

|     |           |          |          |          |
|-----|-----------|----------|----------|----------|
| 24h | 3.97E-08  | 7.70E-08 | 2.49E-09 | 5.44E-08 |
| 36h | 2.93E-08  | 5.76E-08 | 3.30E-08 | 2.34E-07 |
| 48h | 2.62E-08  | 1.14E-08 | 3.44E-08 | 7.53E-08 |
| 72h | 2.57E-08  | 9.09E-09 | 1.50E-08 | 3.79E-08 |
|     | cgd6_4960 |          |          |          |
| 2h  | 8.39E-05  | 1.16E-04 | 2.37E-04 | 1.46E-06 |
| 6h  | 2.98E-04  | 2.01E-03 | 2.92E-03 | 2.08E-05 |
| 12h | 1.89E-04  | 1.09E-03 | 9.29E-05 | 4.32E-05 |
| 24h | 1.46E-04  | 8.63E-04 | 9.29E-04 | 2.73E-05 |
| 36h | 2.84E-04  | 8.27E-04 | 6.63E-04 | 2.24E-05 |
| 48h | 2.11E-03  | 8.39E-04 | 6.29E-04 | 6.99E-06 |
| 72h | 1.32E-03  | 1.76E-03 | 9.97E-04 | 2.54E-05 |
|     | cgd6_4970 |          |          |          |
| 2h  | 7.00E-07  | 6.30E-07 | 4.90E-08 | 1.99E-07 |
| 6h  | 9.51E-07  | 8.07E-06 | 1.60E-06 | 1.15E-06 |
| 12h | 3.23E-06  | 1.48E-05 | 8.07E-06 | 5.10E-07 |
| 24h | 1.16E-06  | 3.53E-05 | 2.55E-06 | 1.21E-06 |
| 36h | 3.92E-07  | 7.96E-07 | 1.63E-06 | 1.63E-06 |
| 48h | 7.48E-07  | 2.98E-06 | 1.24E-06 | 1.02E-06 |
| 72h | 1.54E-06  | 7.51E-07 | 4.62E-06 | 2.09E-06 |
|     | cgd6_4990 |          |          |          |
| 2h  | 2.12E-08  | 0.00E+00 | 0.00E+00 | 0.00E+00 |
| 6h  | 0.00E+00  | 2.02E-08 | 5.45E-08 | 6.26E-10 |
| 12h | 7.16E-07  | 4.58E-06 | 7.33E-07 | 1.55E-07 |
| 24h | 2.94E-07  | 6.14E-07 | 3.91E-07 | 1.03E-07 |
| 36h | 9.37E-08  | 1.86E-07 | 4.47E-07 | 2.16E-07 |
| 48h | 1.39E-07  | 4.77E-08 | 5.34E-07 | 8.07E-08 |
| 72h | 1.16E-06  | 3.57E-07 | 7.90E-07 | 7.63E-07 |
|     | cgd6_5000 |          |          |          |
| 2h  | 1.87E-03  | 7.07E-03 | 6.54E-03 | 1.81E-03 |
| 6h  | 4.01E-04  | 1.62E-03 | 2.38E-03 | 2.29E-03 |
| 12h | 7.24E-04  | 1.62E-02 | 1.00E-02 | 5.81E-04 |
| 24h | 6.44E-04  | 3.45E-03 | 3.02E-03 | 1.06E-03 |
| 36h | 1.91E-04  | 5.03E-04 | 1.62E-03 | 6.20E-04 |
| 48h | 1.28E-04  | 6.92E-04 | 1.13E-03 | 2.31E-04 |
| 72h | 1.24E-04  | 1.35E-04 | 6.36E-04 | 2.03E-04 |
|     | cgd6_5010 |          |          |          |
| 2h  | 4.55E-06  | 3.43E-06 | 2.45E-06 | 1.29E-05 |
| 6h  | 5.43E-07  | 5.06E-07 | 1.79E-06 | 5.03E-07 |
| 12h | 2.21E-06  | 2.93E-06 | 7.85E-06 | 9.50E-07 |
| 24h | 4.58E-07  | 5.40E-06 | 1.48E-06 | 4.33E-07 |
| 36h | 7.69E-07  | 9.15E-07 | 1.67E-06 | 9.61E-07 |
| 48h | 3.50E-07  | 2.51E-06 | 3.39E-06 | 3.82E-07 |
| 72h | 5.26E-06  | 1.93E-06 | 6.68E-06 | 3.22E-06 |
|     | cgd6_5020 |          |          |          |
| 2h  | 9.80E-03  | 1.52E-03 | 3.33E-04 | 4.19E-04 |
| 6h  | 5.90E-04  | 1.90E-04 | 2.61E-04 | 7.69E-05 |
| 12h | 2.58E-03  | 1.98E-03 | 5.51E-05 | 1.52E-04 |
| 24h | 1.20E-03  | 2.81E-04 | 5.08E-04 | 9.33E-05 |
| 36h | 2.98E-04  | 9.96E-05 | 2.19E-04 | 2.66E-04 |
| 48h | 1.41E-03  | 2.33E-04 | 2.50E-04 | 4.28E-05 |
| 72h | 3.63E-03  | 7.38E-04 | 5.20E-04 | 3.66E-04 |
|     | cgd6_5030 |          |          |          |

|     |           |          |          |          |
|-----|-----------|----------|----------|----------|
| 2h  | 2.22E-06  | 8.84E-07 | 4.45E-06 | 1.12E-06 |
| 6h  | 1.71E-06  | 5.83E-07 | 3.91E-06 | 1.04E-06 |
| 12h | 4.57E-07  | 1.21E-06 | 1.82E-06 | 1.16E-06 |
| 24h | 3.04E-07  | 1.81E-06 | 2.88E-06 | 1.36E-06 |
| 36h | 8.02E-07  | 1.13E-06 | 1.10E-06 | 1.03E-06 |
| 48h | 4.38E-07  | 1.31E-06 | 1.93E-06 | 7.41E-07 |
| 72h | 1.96E-06  | 2.45E-06 | 4.19E-06 | 2.69E-06 |
|     | cgd6_5050 |          |          |          |
| 2h  | 0.00E+00  | 1.16E-08 | 0.00E+00 | 4.17E-09 |
| 6h  | 0.00E+00  | 0.00E+00 | 0.00E+00 | 4.44E-09 |
| 12h | 2.28E-08  | 4.24E-08 | 1.40E-08 | 6.70E-05 |
| 24h | 5.05E-09  | 1.72E-09 | 2.73E-09 | 7.94E-09 |
| 36h | 5.06E-08  | 4.91E-08 | 1.20E-08 | 2.71E-08 |
| 48h | 1.36E-07  | 4.90E-08 | 9.34E-08 | 2.48E-08 |
| 72h | 1.30E-06  | 4.22E-07 | 1.39E-06 | 8.31E-07 |
|     | cgd6_5060 |          |          |          |
| 2h  | 1.63E-04  | 7.85E-04 | 1.16E-04 | 1.39E-04 |
| 6h  | 2.62E-03  | 1.18E-02 | 4.35E-03 | 5.81E-04 |
| 12h | 1.06E-02  | 3.62E-02 | 1.43E-02 | 4.21E-04 |
| 24h | 9.91E-04  | 6.02E-03 | 2.88E-03 | 6.78E-04 |
| 36h | 8.51E-04  | 2.87E-03 | 1.90E-03 | 4.29E-04 |
| 48h | 1.41E-03  | 1.26E-03 | 6.45E-04 | 6.88E-05 |
| 72h | 2.30E-04  | 3.25E-04 | 4.33E-04 | 2.15E-04 |
|     | cgd6_5070 |          |          |          |
| 2h  | 9.10E-07  | 1.81E-07 | 8.00E-07 | 6.00E-07 |
| 6h  | 7.44E-06  | 3.30E-05 | 9.64E-05 | 3.77E-06 |
| 12h | 3.35E-07  | 1.02E-06 | 1.87E-06 | 2.94E-07 |
| 24h | 2.26E-06  | 4.80E-06 | 4.02E-05 | 8.15E-06 |
| 36h | 4.64E-06  | 6.40E-06 | 1.24E-05 | 4.61E-06 |
| 48h | 5.16E-06  | 1.94E-06 | 8.02E-06 | 3.18E-06 |
| 72h | 9.49E-08  | 4.52E-07 | 5.30E-07 | 1.16E-07 |
|     | cgd6_5080 |          |          |          |
| 2h  | 3.23E-04  | 3.35E-04 | 1.06E-04 | 1.09E-04 |
| 6h  | 2.94E-04  | 1.16E-03 | 2.95E-03 | 1.96E-04 |
| 12h | 4.84E-06  | 3.21E-05 | 7.46E-04 | 3.21E-05 |
| 24h | 9.73E-05  | 1.74E-04 | 1.23E-03 | 3.04E-04 |
| 36h | 5.60E-05  | 1.37E-04 | 2.58E-04 | 1.03E-04 |
| 48h | 7.00E-05  | 1.15E-04 | 2.05E-04 | 1.09E-04 |
| 72h | 6.88E-06  | 8.03E-06 | 1.46E-05 | 5.96E-06 |
|     | cgd6_5090 |          |          |          |
| 2h  | 1.60E-07  | 5.55E-08 | 3.74E-08 | 3.46E-09 |
| 6h  | 7.51E-08  | 1.06E-07 | 1.11E-07 | 8.51E-09 |
| 12h | 7.29E-09  | 8.35E-09 | 0.00E+00 | 1.63E-09 |
| 24h | 3.88E-08  | 2.06E-08 | 5.88E-08 | 2.07E-08 |
| 36h | 2.26E-08  | 3.89E-08 | 7.44E-08 | 1.22E-08 |
| 48h | 4.74E-08  | 2.72E-08 | 7.41E-08 | 2.84E-08 |
| 72h | 2.46E-08  | 1.71E-08 | 1.63E-07 | 1.93E-08 |
|     | cgd6_5110 |          |          |          |
| 2h  | 6.38E-06  | 3.35E-05 | 8.72E-05 | 2.71E-05 |
| 6h  | 1.21E-05  | 1.31E-05 | 1.38E-05 | 5.59E-06 |
| 12h | 2.00E-06  | 3.14E-06 | 1.21E-05 | 2.62E-06 |
| 24h | 1.06E-05  | 1.07E-05 | 2.17E-05 | 1.28E-05 |
| 36h | 2.21E-06  | 8.26E-06 | 5.03E-06 | 1.30E-05 |



|     |           |          |          |          |
|-----|-----------|----------|----------|----------|
| 48h | 3.00E-06  | 2.10E-06 | 3.69E-06 | 2.88E-06 |
| 72h | 5.77E-07  | 7.98E-07 | 2.40E-07 | 9.75E-07 |
|     | cgd6_5130 |          |          |          |
| 2h  | 3.40E-05  | 1.60E-04 | 1.08E-04 | 1.13E-04 |
| 6h  | 3.00E-05  | 5.00E-05 | 2.59E-05 | 3.32E-04 |
| 12h | 1.50E-05  | 1.68E-05 | 4.50E-05 | 1.74E-04 |
| 24h | 6.46E-05  | 6.51E-05 | 1.18E-04 | 1.91E-04 |
| 36h | 2.11E-05  | 1.92E-05 | 2.69E-05 | 1.02E-04 |
| 48h | 3.07E-05  | 6.83E-06 | 1.25E-05 | 6.54E-05 |
| 72h | 1.01E-05  | 2.49E-06 | 8.09E-06 | 3.53E-05 |
|     | cgd6_5140 |          |          |          |
| 2h  | 3.74E-05  | 3.20E-05 | 2.19E-05 | 2.66E-04 |
| 6h  | 2.54E-05  | 1.83E-05 | 5.28E-05 | 7.58E-04 |
| 12h | 1.36E-05  | 6.21E-06 | 1.27E-05 | 1.58E-04 |
| 24h | 6.09E-05  | 5.88E-05 | 8.54E-05 | 2.20E-04 |
| 36h | 1.77E-05  | 2.51E-05 | 1.14E-05 | 8.32E-05 |
| 48h | 4.44E-05  | 1.78E-05 | 1.92E-05 | 1.00E-04 |
| 72h | 3.08E-05  | 1.01E-05 | 2.86E-05 | 6.22E-04 |
|     | cgd6_5150 |          |          |          |
| 2h  | 5.93E-06  | 5.22E-06 | 1.56E-05 | 1.93E-05 |
| 6h  | 4.36E-07  | 3.77E-06 | 6.60E-06 | 5.59E-05 |
| 12h | 1.26E-06  | 1.64E-06 | 5.71E-05 | 1.73E-05 |
| 24h | 1.10E-05  | 1.39E-05 | 1.89E-05 | 2.36E-05 |
| 36h | 9.78E-06  | 7.17E-06 | 1.57E-05 | 2.81E-05 |
| 48h | 1.26E-05  | 8.53E-06 | 5.25E-06 | 7.39E-05 |
| 72h | 1.55E-05  | 6.33E-06 | 1.17E-05 | 5.61E-05 |
|     | cgd6_5160 |          |          |          |
| 2h  | 6.53E-08  | 3.56E-07 | 6.31E-08 | 1.08E-06 |
| 6h  | 1.52E-08  | 3.04E-09 | 0.00E+00 | 3.92E-08 |
| 12h | 0.00E+00  | 1.41E-07 | 1.54E-08 | 2.77E-08 |
| 24h | 2.62E-08  | 4.96E-08 | 6.90E-08 | 2.24E-08 |
| 36h | 7.23E-08  | 1.34E-07 | 8.31E-08 | 1.13E-07 |
| 48h | 0.00E+00  | 2.76E-07 | 1.84E-07 | 1.91E-07 |
| 72h | 1.83E-06  | 1.71E-06 | 3.13E-06 | 3.39E-06 |
|     | cgd6_5170 |          |          |          |
| 2h  | 1.74E-07  | 8.12E-08 | 2.09E-07 | 8.41E-08 |
| 6h  | 2.02E-08  | 3.89E-08 | 1.63E-08 | 4.15E-08 |
| 12h | 1.45E-07  | 2.94E-08 | 6.08E-08 | 1.08E-07 |
| 24h | 0.00E+00  | 1.85E-07 | 5.27E-07 | 1.61E-07 |
| 36h | 4.97E-07  | 4.24E-07 | 5.20E-07 | 7.30E-07 |
| 48h | 0.00E+00  | 2.67E-07 | 3.57E-07 | 3.78E-07 |
| 72h | 5.91E-06  | 3.02E-06 | 5.48E-06 | 4.85E-06 |
|     | cgd6_5180 |          |          |          |
| 2h  | 2.22E-07  | 0.00E+00 | 1.70E-06 | 5.40E-05 |
| 6h  | 0.00E+00  | 0.00E+00 | 0.00E+00 | 5.93E-07 |
| 12h | 2.65E-08  | 3.04E-07 | 1.83E-08 | 1.02E-07 |
| 24h | 0.00E+00  | 2.75E-07 | 7.30E-07 | 2.91E-07 |
| 36h | 4.91E-06  | 1.74E-06 | 2.09E-06 | 1.44E-05 |
| 48h | 0.00E+00  | 3.80E-06 | 1.40E-06 | 2.51E-04 |
| 72h | 1.49E-05  | 1.00E-05 | 1.70E-05 | 1.10E-04 |
|     | cgd6_5240 |          |          |          |
| 2h  | 0.00E+00  | 4.66E-08 | 0.00E+00 | 1.30E-08 |
| 6h  | 0.00E+00  | 3.82E-10 | 1.99E-09 | 4.65E-09 |

|     |           |          |          |          |
|-----|-----------|----------|----------|----------|
| 12h | 1.60E-07  | 2.25E-07 | 1.51E-07 | 6.77E-07 |
| 24h | 1.51E-07  | 2.07E-07 | 5.00E-07 | 2.33E-07 |
| 36h | 6.63E-07  | 8.71E-07 | 5.72E-07 | 1.30E-06 |
| 48h | 0.00E+00  | 9.70E-07 | 8.12E-07 | 2.55E-06 |
| 72h | 1.57E-06  | 1.75E-06 | 3.55E-06 | 3.67E-06 |
|     | cgd6_5250 |          |          |          |
| 2h  | 2.72E-04  | 4.39E-04 | 1.27E-04 | 3.60E-04 |
| 6h  | 1.22E-04  | 1.87E-04 | 5.12E-04 | 6.17E-03 |
| 12h | 4.21E-05  | 5.99E-05 | 2.02E-04 | 6.24E-04 |
| 24h | 1.67E-04  | 1.21E-04 | 2.69E-04 | 3.01E-03 |
| 36h | 4.08E-04  | 2.95E-04 | 2.03E-04 | 6.23E-04 |
| 48h | 7.29E-05  | 7.25E-05 | 2.50E-05 | 6.15E-04 |
| 72h | 3.49E-05  | 2.62E-05 | 4.03E-05 | 2.61E-04 |
|     | cgd6_5260 |          |          |          |
| 2h  | 8.51E-06  | 3.01E-06 | 2.01E-06 | 9.73E-06 |
| 6h  | 4.00E-06  | 3.43E-06 | 2.28E-06 | 4.30E-05 |
| 12h | 0.00E+00  | 7.88E-07 | 2.53E-06 | 6.49E-06 |
| 24h | 0.00E+00  | 2.37E-06 | 6.25E-06 | 1.26E-05 |
| 36h | 8.18E-06  | 4.05E-06 | 4.36E-06 | 1.41E-05 |
| 48h | 2.68E-06  | 3.83E-06 | 7.55E-07 | 1.88E-05 |
| 72h | 0.00E+00  | 1.47E-06 | 4.49E-06 | 7.17E-06 |
|     | cgd6_5280 |          |          |          |
| 2h  | 1.76E-06  | 5.42E-07 | 1.40E-07 | 5.95E-07 |
| 6h  | 1.44E-06  | 2.44E-06 | 1.13E-06 | 5.55E-06 |
| 12h | 5.67E-06  | 1.88E-05 | 1.06E-05 | 1.45E-05 |
| 24h | 0.00E+00  | 4.72E-06 | 2.74E-06 | 4.30E-06 |
| 36h | 1.71E-06  | 1.83E-06 | 1.11E-05 | 1.55E-05 |
| 48h | 3.37E-06  | 2.48E-06 | 1.36E-06 | 2.11E-06 |
| 72h | 7.73E-07  | 5.03E-07 | 1.55E-06 | 1.09E-06 |
|     | cgd6_5290 |          |          |          |
| 2h  | 3.12E-09  | 0.00E+00 | 2.74E-09 | 1.61E-09 |
| 6h  | 0.00E+00  | 0.00E+00 | 0.00E+00 | 0.00E+00 |
| 12h | 7.63E-08  | 4.34E-08 | 2.06E-08 | 4.92E-08 |
| 24h | 6.17E-09  | 1.08E-08 | 3.00E-09 | 1.19E-08 |
| 36h | 2.63E-08  | 2.33E-08 | 2.27E-08 | 3.38E-08 |
| 48h | 1.68E-08  | 9.48E-09 | 2.28E-09 | 8.82E-09 |
| 72h | 2.99E-08  | 1.01E-08 | 7.88E-09 | 1.42E-08 |
|     | cgd6_5300 |          |          |          |
| 2h  | 0.00E+00  | 0.00E+00 | 0.00E+00 | 1.13E-06 |
| 6h  | 0.00E+00  | 0.00E+00 | 0.00E+00 | 0.00E+00 |
| 12h | 2.24E-04  | 1.29E-04 | 4.23E-04 | 7.45E-04 |
| 24h | 2.83E-05  | 6.99E-05 | 4.05E-05 | 8.75E-05 |
| 36h | 4.19E-05  | 3.81E-05 | 1.55E-04 | 1.98E-04 |
| 48h | 1.81E-05  | 4.82E-06 | 1.56E-05 | 9.07E-05 |
| 72h | 4.83E-05  | 6.48E-06 | 3.22E-05 | 9.03E-05 |
|     | cgd6_5310 |          |          |          |
| 2h  | 6.55E-08  | 3.97E-07 | 2.74E-07 | 1.41E-08 |
| 6h  | 6.43E-09  | 5.27E-09 | 3.71E-09 | 0.00E+00 |
| 12h | 8.43E-07  | 5.30E-07 | 8.01E-07 | 3.31E-07 |
| 24h | 1.35E-06  | 1.11E-06 | 1.11E-06 | 5.83E-07 |
| 36h | 1.75E-06  | 7.40E-07 | 1.81E-06 | 7.90E-07 |
| 48h | 1.05E-06  | 7.86E-07 | 6.94E-07 | 2.74E-07 |
| 72h | 1.93E-07  | 1.27E-07 | 9.86E-08 | 6.95E-08 |

|     |           |          |          |          |
|-----|-----------|----------|----------|----------|
|     | cgd6_5320 |          |          |          |
| 2h  | 5.81E-07  | 1.84E-06 | 5.28E-08 | 1.13E-07 |
| 6h  | 2.17E-06  | 2.84E-06 | 5.51E-06 | 2.83E-06 |
| 12h | 8.36E-07  | 6.95E-07 | 6.09E-07 | 1.88E-07 |
| 24h | 3.91E-06  | 2.10E-06 | 6.23E-06 | 1.77E-06 |
| 36h | 5.68E-07  | 2.13E-06 | 8.66E-07 | 7.99E-07 |
| 48h | 1.23E-06  | 1.83E-06 | 8.21E-07 | 2.21E-07 |
| 72h | 3.48E-07  | 1.93E-07 | 2.46E-07 | 1.18E-07 |
|     | cgd6_5330 |          |          |          |
| 2h  | 0.00E+00  | 0.00E+00 | 0.00E+00 | 0.00E+00 |
| 6h  | 2.26E-05  | 0.00E+00 | 0.00E+00 | 0.00E+00 |
| 12h | 5.07E-05  | 3.59E-04 | 6.60E-04 | 2.42E-05 |
| 24h | 2.87E-05  | 2.20E-04 | 2.29E-04 | 1.77E-05 |
| 36h | 5.69E-05  | 1.56E-04 | 3.45E-04 | 2.26E-04 |
| 48h | 2.90E-05  | 1.78E-04 | 2.61E-04 | 2.09E-05 |
| 72h | 7.62E-06  | 8.59E-05 | 2.24E-04 | 2.37E-05 |
|     | cgd6_5340 |          |          |          |
| 2h  | 0.00E+00  | 9.72E-07 | 4.43E-07 | 0.00E+00 |
| 6h  | 4.35E-06  | 0.00E+00 | 0.00E+00 | 0.00E+00 |
| 12h | 0.00E+00  | 5.19E-07 | 0.00E+00 | 3.95E-08 |
| 24h | 4.04E-07  | 1.35E-07 | 0.00E+00 | 6.91E-07 |
| 36h | 7.88E-06  | 3.42E-06 | 1.12E-06 | 9.95E-08 |
| 48h | 1.33E-04  | 9.91E-05 | 7.47E-04 | 7.88E-07 |
| 72h | 3.37E-05  | 3.31E-06 | 3.15E-06 | 4.41E-07 |
|     | cgd6_5350 |          |          |          |
| 2h  | 0.00E+00  | 0.00E+00 | 0.00E+00 | 0.00E+00 |
| 6h  | 1.55E-04  | 2.43E-05 | 6.34E-05 | 1.23E-06 |
| 12h | 3.50E-04  | 3.62E-04 | 2.62E-04 | 3.77E-06 |
| 24h | 3.50E-04  | 1.47E-04 | 1.65E-04 | 6.37E-06 |
| 36h | 7.24E-04  | 5.52E-04 | 2.01E-04 | 3.16E-05 |
| 48h | 2.83E-04  | 2.33E-04 | 1.17E-04 | 1.92E-06 |
| 72h | 4.40E-05  | 8.18E-06 | 1.11E-05 | 1.28E-06 |
|     | cgd6_5360 |          |          |          |
| 2h  | 0.00E+00  | 0.00E+00 | 0.00E+00 | 0.00E+00 |
| 6h  | 0.00E+00  | 0.00E+00 | 0.00E+00 | 0.00E+00 |
| 12h | 4.68E-07  | 4.48E-07 | 7.97E-07 | 2.59E-07 |
| 24h | 1.70E-07  | 4.07E-07 | 1.01E-07 | 4.62E-08 |
| 36h | 7.17E-07  | 2.89E-07 | 9.05E-07 | 5.55E-07 |
| 48h | 1.28E-07  | 1.68E-07 | 1.88E-07 | 1.17E-07 |
| 72h | 4.05E-08  | 2.00E-08 | 5.05E-08 | 3.12E-08 |
|     | cgd6_5370 |          |          |          |
| 2h  | 8.57E-05  | 0.00E+00 | 0.00E+00 | 7.21E-08 |
| 6h  | 0.00E+00  | 0.00E+00 | 0.00E+00 | 0.00E+00 |
| 12h | 1.41E-03  | 2.34E-04 | 7.67E-05 | 1.78E-06 |
| 24h | 1.30E-04  | 5.04E-05 | 2.33E-05 | 1.67E-06 |
| 36h | 1.04E-04  | 3.50E-05 | 6.66E-05 | 4.10E-06 |
| 48h | 4.43E-05  | 4.59E-05 | 2.76E-05 | 3.40E-07 |
| 72h | 2.00E-05  | 1.29E-06 | 1.04E-05 | 1.50E-07 |
|     | cgd6_5380 |          |          |          |
| 2h  | 1.50E-04  | 1.33E-03 | 3.14E-03 | 3.40E-05 |
| 6h  | 9.21E-06  | 1.47E-04 | 4.06E-05 | 4.14E-06 |
| 12h | 5.07E-04  | 5.38E-03 | 8.51E-04 | 2.22E-04 |
| 24h | 3.06E-04  | 3.02E-03 | 2.39E-03 | 6.34E-05 |

|     |           |          |          |          |
|-----|-----------|----------|----------|----------|
| 36h | 2.56E-05  | 1.98E-04 | 3.28E-04 | 1.48E-04 |
| 48h | 2.34E-05  | 1.91E-04 | 1.49E-04 | 1.39E-05 |
| 72h | 1.70E-05  | 2.35E-04 | 5.41E-05 | 1.15E-05 |
|     | cgd6_5390 |          |          |          |
| 2h  | 1.43E-04  | 3.45E-05 | 8.37E-05 | 3.04E-06 |
| 6h  | 2.24E-03  | 4.20E-04 | 2.42E-04 | 1.04E-05 |
| 12h | 4.15E-05  | 1.43E-05 | 1.44E-04 | 2.87E-06 |
| 24h | 2.23E-04  | 1.61E-04 | 5.78E-04 | 8.40E-06 |
| 36h | 1.12E-04  | 6.88E-05 | 5.14E-04 | 1.20E-05 |
| 48h | 6.42E-05  | 8.16E-05 | 6.76E-05 | 1.63E-06 |
| 72h | 5.17E-05  | 1.41E-05 | 4.96E-05 | 1.69E-06 |
|     | cgd6_5400 |          |          |          |
| 2h  | 3.52E-04  | 2.04E-04 | 7.96E-05 | 5.05E-05 |
| 6h  | 3.12E-05  | 3.56E-05 | 4.76E-05 | 5.29E-05 |
| 12h | 1.16E-04  | 3.49E-05 | 2.85E-04 | 2.53E-05 |
| 24h | 7.94E-04  | 2.35E-04 | 9.39E-05 | 6.26E-05 |
| 36h | 5.65E-05  | 7.13E-05 | 9.51E-05 | 2.53E-05 |
| 48h | 9.27E-05  | 4.96E-05 | 7.11E-05 | 1.50E-05 |
| 72h | 1.46E-05  | 4.07E-06 | 7.00E-06 | 1.29E-06 |
|     | cgd6_5410 |          |          |          |
| 2h  | 3.62E-02  | 3.45E-01 | 7.56E-02 | 3.40E-03 |
| 6h  | 1.90E-02  | 3.06E-02 | 4.91E-02 | 2.26E-03 |
| 12h | 2.72E-02  | 1.60E-02 | 8.13E-02 | 6.95E-04 |
| 24h | 6.03E-02  | 4.12E-02 | 2.58E-02 | 3.20E-03 |
| 36h | 6.82E-03  | 1.47E-02 | 3.31E-02 | 8.04E-04 |
| 48h | 6.90E-03  | 1.27E-02 | 1.61E-02 | 3.05E-04 |
| 72h | 2.91E-03  | 3.66E-03 | 3.05E-03 | 1.22E-04 |
|     | cgd6_5420 |          |          |          |
| 2h  | 7.32E-08  | 7.30E-07 | 0.00E+00 | 8.18E-08 |
| 6h  | 8.70E-08  | 3.04E-07 | 5.77E-08 | 1.16E-07 |
| 12h | 5.98E-07  | 1.10E-06 | 1.27E-06 | 8.33E-07 |
| 24h | 7.79E-07  | 3.43E-07 | 5.37E-07 | 2.33E-07 |
| 36h | 3.72E-07  | 8.31E-07 | 1.04E-06 | 1.11E-06 |
| 48h | 3.49E-07  | 3.13E-07 | 7.64E-07 | 7.66E-08 |
| 72h | 1.00E-07  | 3.84E-07 | 1.62E-07 | 3.51E-07 |
|     | cgd6_5510 |          |          |          |
| 2h  | 1.03E-05  | 1.06E-05 | 1.27E-06 | 3.29E-06 |
| 6h  | 1.57E-06  | 1.08E-06 | 1.56E-07 | 4.39E-07 |
| 12h | 2.86E-06  | 2.19E-07 | 3.48E-07 | 2.06E-06 |
| 24h | 2.51E-05  | 8.07E-06 | 2.71E-07 | 8.72E-07 |
| 36h | 7.85E-06  | 5.42E-06 | 2.88E-07 | 5.48E-07 |
| 48h | 1.65E-05  | 1.61E-06 | 2.18E-07 | 2.51E-06 |
| 72h | 1.77E-06  | 1.94E-07 | 1.06E-07 | 7.65E-07 |
|     | cgd6_5520 |          |          |          |
| 2h  | 1.01E-06  | 2.00E-06 | 2.56E-06 | 8.24E-07 |
| 6h  | 9.52E-08  | 6.31E-07 | 6.51E-07 | 2.57E-07 |
| 12h | 7.29E-08  | 7.44E-08 | 6.77E-07 | 2.78E-07 |
| 24h | 3.22E-07  | 6.46E-07 | 3.03E-07 | 6.20E-07 |
| 36h | 6.54E-07  | 5.38E-07 | 2.92E-07 | 1.83E-07 |
| 48h | 4.14E-07  | 3.79E-07 | 4.36E-07 | 2.21E-07 |
| 72h | 2.32E-07  | 7.55E-08 | 4.03E-08 | 1.26E-07 |
|     | cgd7_10   |          |          |          |
| 2h  | 1.42E-06  | 2.02E-06 | 5.32E-06 | 1.32E-06 |

|     |          |          |          |          |
|-----|----------|----------|----------|----------|
| 6h  | 3.46E-08 | 1.19E-07 | 2.81E-07 | 9.37E-08 |
| 12h | 5.71E-06 | 5.60E-06 | 2.55E-06 | 3.48E-06 |
| 24h | 2.38E-06 | 5.24E-06 | 6.64E-07 | 1.08E-06 |
| 36h | 1.26E-06 | 8.18E-07 | 5.51E-07 | 7.60E-07 |
| 48h | 7.11E-07 | 5.54E-07 | 6.45E-07 | 4.00E-07 |
| 72h | 2.27E-07 | 1.03E-07 | 3.57E-08 | 1.41E-07 |
|     | cgd7_30  |          |          |          |
| 2h  | 8.60E-06 | 1.73E-06 | 2.34E-06 | 8.48E-07 |
| 6h  | 2.48E-06 | 4.38E-06 | 5.82E-06 | 5.48E-06 |
| 12h | 1.37E-06 | 7.06E-07 | 1.19E-06 | 1.72E-06 |
| 24h | 2.44E-06 | 6.31E-06 | 3.18E-06 | 4.55E-06 |
| 36h | 3.51E-06 | 4.18E-06 | 9.43E-07 | 1.96E-06 |
| 48h | 3.43E-06 | 1.20E-06 | 7.94E-07 | 7.81E-07 |
| 72h | 2.42E-07 | 2.52E-07 | 3.35E-08 | 1.64E-07 |
|     | cgd7_40  |          |          |          |
| 2h  | 0.00E+00 | 0.00E+00 | 0.00E+00 | 0.00E+00 |
| 6h  | 2.37E-08 | 3.93E-08 | 9.35E-08 | 7.22E-07 |
| 12h | 5.52E-06 | 1.03E-06 | 6.50E-07 | 2.74E-06 |
| 24h | 6.69E-06 | 2.89E-06 | 9.62E-07 | 7.58E-06 |
| 36h | 2.45E-05 | 6.90E-06 | 1.19E-06 | 6.11E-06 |
| 48h | 3.42E-05 | 3.44E-06 | 2.05E-06 | 3.29E-06 |
| 72h | 1.49E-05 | 2.14E-06 | 2.73E-07 | 4.94E-06 |
|     | cgd7_60  |          |          |          |
| 2h  | 0.00E+00 | 0.00E+00 | 0.00E+00 | 0.00E+00 |
| 6h  | 4.62E-05 | 2.41E-05 | 1.76E-06 | 5.51E-05 |
| 12h | 1.49E-05 | 0.00E+00 | 5.60E-07 | 4.69E-05 |
| 24h | 3.76E-05 | 1.07E-05 | 3.55E-06 | 5.18E-05 |
| 36h | 5.12E-05 | 1.70E-04 | 1.09E-05 | 3.87E-04 |
| 48h | 1.78E-04 | 8.26E-05 | 1.70E-05 | 6.80E-04 |
| 72h | 1.11E-04 | 3.47E-05 | 8.53E-06 | 3.48E-04 |
|     | cgd7_70  |          |          |          |
| 2h  | 2.27E-08 | 0.00E+00 | 2.11E-08 | 0.00E+00 |
| 6h  | 4.64E-09 | 1.66E-09 | 2.58E-09 | 0.00E+00 |
| 12h | 1.72E-09 | 3.08E-09 | 8.30E-09 | 0.00E+00 |
| 24h | 1.11E-08 | 1.84E-08 | 3.86E-09 | 1.08E-08 |
| 36h | 2.02E-07 | 1.77E-07 | 2.70E-08 | 4.10E-08 |
| 48h | 2.61E-06 | 9.35E-07 | 5.33E-07 | 6.42E-07 |
| 72h | 2.23E-06 | 5.08E-07 | 4.02E-07 | 9.14E-07 |
|     | cgd7_90  |          |          |          |
| 2h  | 1.59E-07 | 4.47E-08 | 1.63E-07 | 6.46E-08 |
| 6h  | 5.30E-07 | 1.39E-06 | 1.06E-06 | 1.03E-06 |
| 12h | 1.23E-07 | 5.10E-07 | 1.95E-07 | 6.88E-08 |
| 24h | 6.72E-07 | 3.21E-06 | 1.30E-06 | 4.10E-07 |
| 36h | 6.87E-07 | 1.96E-06 | 5.91E-07 | 5.24E-07 |
| 48h | 1.48E-06 | 1.39E-06 | 1.08E-06 | 5.08E-07 |
| 72h | 2.75E-07 | 4.43E-07 | 3.63E-07 | 7.93E-07 |
|     | cgd7_100 |          |          |          |
| 2h  | 1.05E-06 | 8.60E-07 | 2.58E-06 | 1.04E-06 |
| 6h  | 3.12E-06 | 3.12E-06 | 3.23E-06 | 3.91E-06 |
| 12h | 4.20E-06 | 1.05E-05 | 2.23E-06 | 5.19E-06 |
| 24h | 2.70E-06 | 3.28E-06 | 1.95E-06 | 1.59E-06 |
| 36h | 1.40E-06 | 2.87E-06 | 2.03E-06 | 1.64E-06 |
| 48h | 1.01E-06 | 4.40E-07 | 8.48E-07 | 7.94E-07 |

|     |          |          |          |          |
|-----|----------|----------|----------|----------|
| 72h | 4.06E-07 | 2.74E-04 | 4.73E-07 | 7.92E-07 |
|     | cgd7_110 |          |          |          |
| 2h  | 6.44E-04 | 1.10E-03 | 4.95E-03 | 1.84E-03 |
| 6h  | 4.92E-04 | 4.79E-03 | 4.62E-03 | 2.77E-03 |
| 12h | 2.58E-04 | 6.83E-03 | 4.32E-03 | 1.00E-03 |
| 24h | 5.25E-04 | 9.01E-03 | 3.99E-03 | 1.99E-03 |
| 36h | 2.81E-04 | 1.85E-03 | 1.71E-03 | 1.06E-03 |
| 48h | 1.61E-04 | 1.07E-03 | 1.60E-03 | 7.20E-04 |
| 72h | 3.00E-05 | 2.11E-03 | 5.21E-04 | 3.92E-04 |
|     | cgd7_120 |          |          |          |
| 2h  | 2.44E-05 | 2.29E-06 | 5.13E-05 | 5.25E-05 |
| 6h  | 8.97E-07 | 7.33E-05 | 2.87E-05 | 9.37E-06 |
| 12h | 3.58E-03 | 1.14E-02 | 1.19E-02 | 1.60E-02 |
| 24h | 5.88E-04 | 1.98E-03 | 1.30E-03 | 3.30E-03 |
| 36h | 2.23E-04 | 3.62E-03 | 2.34E-03 | 9.38E-04 |
| 48h | 6.92E-05 | 2.29E-03 | 6.64E-04 | 5.75E-04 |
| 72h | 2.03E-05 | 3.59E-03 | 3.14E-04 | 3.17E-04 |
|     | cgd7_130 |          |          |          |
| 2h  | 5.14E-04 | 2.81E-04 | 6.56E-04 | 6.80E-04 |
| 6h  | 1.41E-03 | 4.99E-03 | 5.52E-03 | 1.68E-03 |
| 12h | 3.02E-04 | 1.98E-03 | 9.13E-04 | 1.53E-04 |
| 24h | 4.49E-04 | 2.93E-03 | 1.56E-03 | 5.74E-04 |
| 36h | 4.13E-04 | 6.94E-04 | 8.68E-04 | 4.97E-04 |
| 48h | 2.21E-04 | 6.20E-04 | 4.81E-04 | 3.12E-04 |
| 72h | 2.60E-05 | 1.07E-04 | 1.08E-04 | 1.13E-04 |
|     | cgd7_140 |          |          |          |
| 2h  | 0.00E+00 | 3.29E-05 | 0.00E+00 | 3.28E-05 |
| 6h  | 4.72E-06 | 4.46E-05 | 7.50E-06 | 1.62E-04 |
| 12h | 3.31E-06 | 7.47E-05 | 2.40E-05 | 0.00E+00 |
| 24h | 2.15E-06 | 3.51E-04 | 1.77E-04 | 1.03E-04 |
| 36h | 8.26E-06 | 6.31E-05 | 5.52E-05 | 7.27E-05 |
| 48h | 3.03E-05 | 2.05E-05 | 2.27E-05 | 3.56E-05 |
| 72h | 2.19E-05 | 2.66E-04 | 5.20E-04 | 8.46E-05 |
|     | cgd7_160 |          |          |          |
| 2h  | 1.18E-08 | 2.13E-08 | 4.41E-08 | 9.18E-08 |
| 6h  | 3.79E-08 | 1.19E-06 | 9.54E-07 | 6.78E-08 |
| 12h | 9.13E-08 | 1.77E-07 | 1.09E-07 | 1.36E-07 |
| 24h | 1.78E-07 | 2.84E-07 | 1.18E-06 | 2.22E-07 |
| 36h | 1.48E-07 | 4.05E-07 | 2.64E-07 | 5.37E-07 |
| 48h | 5.26E-07 | 1.08E-06 | 7.00E-07 | 8.53E-07 |
| 72h | 1.24E-07 | 1.26E-06 | 8.92E-07 | 1.14E-06 |
|     | cgd7_180 |          |          |          |
| 2h  | 0.00E+00 | 0.00E+00 | 7.09E-07 | 0.00E+00 |
| 6h  | 1.46E-08 | 3.20E-05 | 1.33E-04 | 1.33E-05 |
| 12h | 1.10E-06 | 1.50E-05 | 2.67E-05 | 7.80E-06 |
| 24h | 7.96E-06 | 3.32E-04 | 7.91E-05 | 2.54E-05 |
| 36h | 9.69E-06 | 1.08E-04 | 5.93E-05 | 9.37E-05 |
| 48h | 2.44E-04 | 6.48E-04 | 1.18E-03 | 1.01E-04 |
| 72h | 3.44E-04 | 9.67E-04 | 2.00E-03 | 3.54E-03 |
|     | cgd7_200 |          |          |          |
| 2h  | 1.12E-06 | 1.23E-06 | 7.81E-07 | 9.39E-07 |
| 6h  | 3.06E-06 | 5.47E-06 | 1.88E-06 | 3.12E-06 |
| 12h | 8.19E-07 | 6.50E-06 | 3.25E-06 | 7.80E-07 |

|     |          |          |          |          |
|-----|----------|----------|----------|----------|
| 24h | 2.61E-06 | 4.33E-06 | 2.04E-06 | 1.25E-06 |
| 36h | 4.11E-07 | 1.52E-06 | 1.49E-06 | 9.30E-07 |
| 48h | 7.73E-07 | 2.68E-06 | 9.22E-07 | 2.70E-07 |
| 72h | 1.52E-07 | 1.62E-07 | 2.23E-07 | 1.70E-07 |
|     | cgd7_210 |          |          |          |
| 2h  | 6.98E-06 | 6.48E-06 | 1.06E-05 | 9.99E-06 |
| 6h  | 5.11E-06 | 3.18E-06 | 3.20E-06 | 6.66E-06 |
| 12h | 6.86E-06 | 4.82E-05 | 1.94E-05 | 7.13E-06 |
| 24h | 1.01E-05 | 1.91E-05 | 8.51E-06 | 1.04E-05 |
| 36h | 4.02E-06 | 6.51E-06 | 4.44E-06 | 3.05E-06 |
| 48h | 2.20E-06 | 3.70E-06 | 3.08E-06 | 1.06E-06 |
| 72h | 3.91E-07 | 1.94E-06 | 1.17E-06 | 9.81E-07 |
|     | cgd7_230 |          |          |          |
| 2h  | 7.76E-06 | 1.19E-06 | 1.98E-06 | 8.61E-07 |
| 6h  | 1.72E-06 | 3.28E-06 | 3.22E-06 | 1.96E-06 |
| 12h | 7.53E-07 | 2.78E-06 | 1.90E-06 | 1.42E-07 |
| 24h | 1.28E-06 | 3.42E-06 | 1.65E-06 | 8.26E-07 |
| 36h | 1.20E-06 | 2.24E-06 | 1.22E-06 | 6.46E-07 |
| 48h | 4.88E-07 | 5.83E-07 | 8.39E-07 | 2.64E-07 |
| 72h | 3.29E-07 | 8.76E-07 | 3.20E-07 | 2.29E-07 |
|     | cgd7_240 |          |          |          |
| 2h  | 1.59E-04 | 4.10E-04 | 3.43E-04 | 3.59E-07 |
| 6h  | 9.03E-06 | 5.21E-04 | 8.91E-06 | 4.93E-07 |
| 12h | 4.76E-04 | 5.00E-06 | 2.84E-04 | 4.81E-06 |
| 24h | 3.24E-04 | 2.03E-04 | 4.77E-04 | 2.05E-06 |
| 36h | 1.20E-03 | 1.07E-03 | 1.07E-03 | 3.40E-06 |
| 48h | 1.78E-03 | 9.65E-04 | 1.12E-03 | 5.67E-06 |
| 72h | 1.05E-03 | 3.42E-04 | 2.56E-03 | 6.06E-06 |
|     | cgd7_250 |          |          |          |
| 2h  | 2.05E-05 | 8.24E-06 | 5.10E-06 | 5.52E-06 |
| 6h  | 1.01E-07 | 2.48E-06 | 7.79E-06 | 1.11E-06 |
| 12h | 2.90E-06 | 4.88E-07 | 3.83E-06 | 4.11E-06 |
| 24h | 4.54E-06 | 4.48E-06 | 5.46E-06 | 3.75E-06 |
| 36h | 1.53E-06 | 1.71E-06 | 1.65E-06 | 6.89E-07 |
| 48h | 1.10E-06 | 1.08E-06 | 1.37E-06 | 1.03E-06 |
| 72h | 7.33E-07 | 2.18E-07 | 6.42E-07 | 1.18E-06 |
|     | cgd7_260 |          |          |          |
| 2h  | 2.33E-02 | 1.18E-04 | 1.38E-02 | 6.69E-06 |
| 6h  | 3.25E-04 | 2.78E-04 | 1.81E-03 | 1.86E-05 |
| 12h | 7.68E-04 | 1.50E-03 | 1.23E-03 | 1.56E-05 |
| 24h | 1.25E-03 | 2.11E-04 | 1.99E-03 | 5.06E-05 |
| 36h | 4.13E-04 | 2.01E-04 | 5.62E-04 | 1.33E-04 |
| 48h | 4.57E-04 | 4.74E-05 | 3.76E-04 | 3.05E-05 |
| 72h | 3.04E-04 | 1.24E-04 | 1.68E-04 | 1.76E-05 |
|     | cgd7_270 |          |          |          |
| 2h  | 1.57E-07 | 0.00E+00 | 4.90E-07 | 1.04E-05 |
| 6h  | 0.00E+00 | 0.00E+00 | 0.00E+00 | 0.00E+00 |
| 12h | 4.61E-07 | 2.21E-07 | 2.04E-07 | 1.02E-05 |
| 24h | 5.25E-07 | 3.66E-08 | 4.93E-07 | 6.56E-06 |
| 36h | 2.26E-06 | 2.97E-06 | 7.29E-06 | 2.21E-05 |
| 48h | 3.74E-06 | 6.47E-07 | 7.78E-06 | 8.40E-05 |
| 72h | 1.08E-05 | 4.18E-06 | 1.01E-05 | 4.61E-05 |
|     | cgd7_280 |          |          |          |

|     |          |          |          |          |
|-----|----------|----------|----------|----------|
| 2h  | 0.00E+00 | 0.00E+00 | 0.00E+00 | 0.00E+00 |
| 6h  | 0.00E+00 | 0.00E+00 | 0.00E+00 | 0.00E+00 |
| 12h | 1.81E-05 | 4.54E-06 | 2.45E-05 | 1.21E-05 |
| 24h | 8.64E-06 | 4.09E-06 | 1.89E-05 | 8.36E-06 |
| 36h | 3.70E-05 | 2.51E-05 | 1.26E-04 | 5.25E-05 |
| 48h | 2.28E-05 | 2.82E-06 | 3.41E-05 | 3.89E-05 |
| 72h | 5.05E-05 | 1.14E-05 | 1.19E-04 | 2.50E-05 |
|     | cgd7_290 |          |          |          |
| 2h  | 0.00E+00 | 0.00E+00 | 0.00E+00 | 0.00E+00 |
| 6h  | 0.00E+00 | 0.00E+00 | 0.00E+00 | 0.00E+00 |
| 12h | 1.38E-04 | 7.96E-05 | 1.92E-04 | 2.57E-06 |
| 24h | 1.67E-04 | 2.44E-05 | 4.55E-04 | 6.44E-06 |
| 36h | 5.93E-04 | 4.99E-04 | 6.68E-04 | 1.29E-05 |
| 48h | 4.07E-04 | 1.16E-04 | 8.76E-04 | 5.16E-06 |
| 72h | 3.61E-04 | 2.78E-04 | 6.04E-04 | 2.28E-05 |
|     | cgd7_300 |          |          |          |
| 2h  | 1.52E-06 | 0.00E+00 | 0.00E+00 | 0.00E+00 |
| 6h  | 5.64E-08 | 0.00E+00 | 0.00E+00 | 0.00E+00 |
| 12h | 0.00E+00 | 0.00E+00 | 1.46E-07 | 2.08E-07 |
| 24h | 7.70E-07 | 6.91E-08 | 4.47E-06 | 5.88E-08 |
| 36h | 1.01E-05 | 7.95E-06 | 8.44E-05 | 1.44E-06 |
| 48h | 2.13E-02 | 5.41E-03 | 3.95E-02 | 1.54E-04 |
| 72h | 1.19E-02 | 6.96E-03 | 2.38E-02 | 1.74E-04 |
|     | cgd7_320 |          |          |          |
| 2h  | 2.76E-04 | 1.11E-04 | 1.39E-03 | 4.54E-04 |
| 6h  | 1.61E-04 | 4.33E-04 | 4.54E-03 | 1.71E-03 |
| 12h | 3.32E-05 | 1.52E-04 | 2.66E-03 | 2.44E-04 |
| 24h | 2.01E-04 | 2.74E-04 | 1.32E-03 | 1.01E-03 |
| 36h | 5.72E-05 | 1.01E-04 | 4.11E-04 | 1.74E-04 |
| 48h | 5.49E-05 | 5.22E-05 | 3.12E-04 | 2.09E-04 |
| 72h | 2.39E-06 | 6.89E-06 | 2.04E-04 | 4.90E-05 |
|     | cgd7_330 |          |          |          |
| 2h  | 1.40E-08 | 0.00E+00 | 0.00E+00 | 0.00E+00 |
| 6h  | 6.76E-07 | 7.88E-07 | 6.59E-06 | 1.24E-05 |
| 12h | 2.46E-07 | 1.62E-07 | 1.97E-07 | 3.12E-06 |
| 24h | 4.58E-07 | 3.38E-07 | 3.54E-06 | 7.29E-06 |
| 36h | 8.92E-07 | 6.78E-06 | 1.61E-06 | 6.63E-06 |
| 48h | 1.06E-06 | 7.11E-07 | 9.64E-07 | 1.66E-06 |
| 72h | 1.81E-07 | 7.51E-07 | 4.19E-07 | 1.01E-06 |
|     | cgd7_340 |          |          |          |
| 2h  | 8.57E-07 | 2.22E-07 | 4.08E-06 | 9.78E-07 |
| 6h  | 8.27E-05 | 9.41E-05 | 5.58E-04 | 6.94E-05 |
| 12h | 7.56E-05 | 1.99E-05 | 1.66E-04 | 1.16E-05 |
| 24h | 1.34E-04 | 2.76E-05 | 3.02E-04 | 2.77E-05 |
| 36h | 7.86E-05 | 1.61E-04 | 1.99E-04 | 3.48E-05 |
| 48h | 1.33E-04 | 8.71E-05 | 2.28E-04 | 2.62E-05 |
| 72h | 6.76E-05 | 1.12E-05 | 8.45E-05 | 6.76E-06 |
|     | cgd7_350 |          |          |          |
| 2h  | 0.00E+00 | 0.00E+00 | 0.00E+00 | 5.33E-08 |
| 6h  | 2.30E-08 | 2.27E-07 | 2.03E-07 | 2.21E-06 |
| 12h | 5.42E-07 | 6.26E-07 | 5.04E-07 | 5.11E-06 |
| 24h | 3.26E-07 | 3.45E-07 | 4.89E-07 | 3.92E-06 |
| 36h | 3.13E-07 | 3.15E-06 | 1.29E-06 | 3.99E-06 |



|     |          |          |          |          |
|-----|----------|----------|----------|----------|
| 48h | 8.41E-07 | 1.02E-06 | 7.81E-07 | 5.16E-06 |
| 72h | 1.70E-07 | 8.64E-07 | 2.60E-07 | 1.62E-06 |
|     | cgd7_370 |          |          |          |
| 2h  | 4.14E-04 | 0.00E+00 | 2.38E-04 | 2.12E-06 |
| 6h  | 1.35E-04 | 3.34E-04 | 7.51E-04 | 5.75E-06 |
| 12h | 1.16E-02 | 2.95E-02 | 1.19E-02 | 5.42E-05 |
| 24h | 8.10E-03 | 5.94E-03 | 7.79E-03 | 9.14E-06 |
| 36h | 7.75E-03 | 1.32E-02 | 2.55E-02 | 3.44E-05 |
| 48h | 4.15E-03 | 1.69E-03 | 1.42E-02 | 1.92E-05 |
| 72h | 8.13E-03 | 1.60E-03 | 1.28E-02 | 2.02E-05 |
|     | cgd7_380 |          |          |          |
| 2h  | 0.00E+00 | 7.81E-07 | 0.00E+00 | 0.00E+00 |
| 6h  | 1.11E-05 | 4.84E-05 | 5.83E-05 | 6.05E-05 |
| 12h | 2.07E-06 | 1.03E-05 | 1.87E-06 | 1.37E-05 |
| 24h | 3.47E-06 | 1.61E-05 | 7.83E-06 | 3.55E-05 |
| 36h | 2.33E-06 | 3.58E-05 | 3.59E-06 | 2.69E-05 |
| 48h | 2.30E-05 | 3.71E-05 | 1.81E-05 | 3.19E-05 |
| 72h | 4.31E-06 | 1.02E-05 | 5.71E-06 | 1.46E-05 |
|     | cgd7_400 |          |          |          |
| 2h  | 0.00E+00 | 0.00E+00 | 0.00E+00 | 4.91E-09 |
| 6h  | 4.04E-08 | 0.00E+00 | 0.00E+00 | 0.00E+00 |
| 12h | 2.88E-09 | 1.53E-08 | 1.38E-09 | 2.38E-09 |
| 24h | 8.52E-09 | 3.05E-09 | 3.46E-08 | 1.15E-08 |
| 36h | 5.44E-08 | 1.73E-07 | 9.76E-08 | 1.39E-07 |
| 48h | 4.01E-05 | 6.59E-05 | 1.31E-04 | 5.94E-05 |
| 72h | 1.32E-04 | 1.44E-04 | 2.93E-04 | 1.27E-04 |
|     | cgd7_410 |          |          |          |
| 2h  | 0.00E+00 | 0.00E+00 | 0.00E+00 | 1.68E-06 |
| 6h  | 1.42E-06 | 4.93E-06 | 3.19E-06 | 3.43E-06 |
| 12h | 1.07E-05 | 8.09E-05 | 6.00E-06 | 6.05E-05 |
| 24h | 1.57E-05 | 2.48E-04 | 1.82E-05 | 8.18E-05 |
| 36h | 7.72E-05 | 4.01E-04 | 7.34E-05 | 1.01E-03 |
| 48h | 1.19E-04 | 2.93E-04 | 3.64E-05 | 3.36E-04 |
| 72h | 1.39E-05 | 1.50E-04 | 5.62E-06 | 6.18E-05 |
|     | cgd7_420 |          |          |          |
| 2h  | 9.97E-04 | 2.01E-03 | 7.08E-05 | 1.57E-03 |
| 6h  | 1.65E-04 | 8.11E-04 | 3.71E-04 | 7.29E-04 |
| 12h | 3.28E-04 | 1.93E-03 | 6.02E-04 | 1.49E-03 |
| 24h | 3.07E-04 | 2.31E-03 | 1.27E-04 | 6.56E-04 |
| 36h | 4.64E-04 | 1.67E-03 | 6.63E-05 | 5.36E-04 |
| 48h | 2.25E-04 | 4.42E-04 | 4.88E-04 | 4.94E-04 |
| 72h | 1.59E-04 | 5.07E-04 | 6.44E-05 | 1.07E-04 |
|     | cgd7_450 |          |          |          |
| 2h  | 4.89E-02 | 1.31E-03 | 4.70E-03 | 5.54E-03 |
| 6h  | 1.45E-02 | 2.58E-03 | 2.92E-02 | 5.72E-04 |
| 12h | 7.31E-03 | 3.65E-04 | 2.16E-02 | 1.23E-02 |
| 24h | 2.39E-03 | 2.22E-03 | 6.96E-03 | 2.13E-03 |
| 36h | 1.94E-03 | 1.55E-03 | 2.53E-04 | 8.69E-04 |
| 48h | 4.56E-03 | 1.47E-03 | 5.67E-03 | 8.64E-03 |
| 72h | 1.87E-03 | 1.07E-03 | 7.24E-03 | 4.70E-02 |
|     | cgd7_460 |          |          |          |
| 2h  | 5.78E-05 | 8.77E-04 | 8.63E-06 | 7.44E-04 |
| 6h  | 5.28E-05 | 1.26E-03 | 1.01E-04 | 5.28E-04 |

|     |          |          |          |          |
|-----|----------|----------|----------|----------|
| 12h | 3.92E-05 | 4.24E-04 | 7.12E-05 | 3.67E-04 |
| 24h | 4.26E-05 | 1.59E-03 | 3.08E-05 | 5.58E-04 |
| 36h | 2.21E-04 | 1.34E-03 | 1.18E-04 | 9.09E-04 |
| 48h | 1.68E-04 | 1.20E-03 | 1.52E-04 | 1.03E-03 |
| 72h | 6.11E-04 | 1.57E-03 | 3.56E-04 | 1.60E-03 |
|     | cgd7_470 |          |          |          |
| 2h  | 1.32E-07 | 2.73E-08 | 1.17E-08 | 8.25E-08 |
| 6h  | 1.73E-07 | 5.07E-07 | 3.28E-07 | 8.68E-07 |
| 12h | 1.43E-07 | 6.13E-07 | 2.61E-07 | 2.32E-07 |
| 24h | 1.25E-07 | 7.59E-07 | 2.89E-07 | 7.40E-07 |
| 36h | 9.61E-07 | 1.58E-06 | 9.58E-07 | 1.98E-06 |
| 48h | 3.28E-07 | 1.50E-06 | 4.88E-07 | 1.31E-06 |
| 72h | 1.21E-06 | 8.82E-07 | 1.24E-06 | 1.24E-06 |
|     | cgd7_480 |          |          |          |
| 2h  | 3.64E-05 | 2.30E-05 | 6.52E-06 | 2.85E-05 |
| 6h  | 4.04E-07 | 1.07E-06 | 8.02E-07 | 2.56E-06 |
| 12h | 1.22E-04 | 1.23E-04 | 1.73E-04 | 6.72E-05 |
| 24h | 3.83E-05 | 1.32E-04 | 9.80E-06 | 2.83E-05 |
| 36h | 4.21E-05 | 4.34E-05 | 3.99E-05 | 4.63E-05 |
| 48h | 1.09E-05 | 1.41E-05 | 1.69E-05 | 1.16E-05 |
| 72h | 1.77E-05 | 1.40E-05 | 1.25E-05 | 9.62E-06 |
|     | cgd7_490 |          |          |          |
| 2h  | 3.43E-07 | 1.98E-07 | 4.14E-07 | 6.83E-08 |
| 6h  | 3.67E-07 | 2.11E-06 | 2.72E-06 | 1.89E-06 |
| 12h | 3.25E-06 | 1.78E-05 | 3.71E-06 | 6.05E-06 |
| 24h | 6.25E-07 | 1.49E-05 | 7.37E-07 | 5.36E-06 |
| 36h | 1.11E-05 | 1.61E-05 | 5.31E-06 | 1.04E-05 |
| 48h | 3.81E-06 | 1.15E-05 | 1.89E-06 | 7.88E-06 |
| 72h | 3.40E-06 | 4.53E-06 | 1.59E-06 | 3.10E-06 |
|     | cgd7_500 |          |          |          |
| 2h  | 2.00E-06 | 3.63E-06 | 6.23E-07 | 1.30E-06 |
| 6h  | 2.88E-07 | 6.58E-07 | 3.56E-07 | 4.46E-07 |
| 12h | 3.80E-07 | 4.42E-07 | 6.88E-07 | 9.41E-07 |
| 24h | 1.98E-07 | 1.26E-06 | 4.65E-07 | 9.11E-07 |
| 36h | 2.02E-07 | 9.15E-07 | 3.00E-07 | 4.30E-07 |
| 48h | 2.60E-07 | 4.08E-07 | 3.18E-07 | 3.32E-07 |
| 72h | 2.15E-07 | 3.08E-07 | 2.38E-07 | 2.60E-07 |
|     | cgd7_580 |          |          |          |
| 2h  | 0.00E+00 | 0.00E+00 | 0.00E+00 | 0.00E+00 |
| 6h  | 0.00E+00 | 0.00E+00 | 0.00E+00 | 0.00E+00 |
| 12h | 1.51E-05 | 1.63E-04 | 3.24E-05 | 6.03E-05 |
| 24h | 2.48E-06 | 6.29E-05 | 5.87E-06 | 3.86E-05 |
| 36h | 6.60E-05 | 1.53E-04 | 3.18E-05 | 2.10E-04 |
| 48h | 1.07E-04 | 1.36E-04 | 8.64E-05 | 2.41E-04 |
| 72h | 1.19E-04 | 3.04E-04 | 1.84E-04 | 3.10E-04 |
|     | cgd7_630 |          |          |          |
| 2h  | 1.87E-06 | 1.17E-06 | 3.01E-07 | 5.44E-07 |
| 6h  | 6.72E-08 | 1.13E-06 | 3.46E-07 | 5.84E-07 |
| 12h | 3.94E-06 | 3.29E-06 | 4.05E-06 | 4.78E-06 |
| 24h | 3.88E-07 | 2.70E-06 | 4.71E-07 | 2.43E-06 |
| 36h | 1.79E-06 | 2.41E-06 | 1.00E-06 | 1.97E-06 |
| 48h | 1.01E-06 | 9.73E-07 | 7.46E-07 | 1.05E-06 |
| 72h | 1.30E-06 | 9.00E-07 | 2.02E-06 | 1.99E-06 |

|     |           |          |          |          |
|-----|-----------|----------|----------|----------|
|     | cgd7_1470 |          |          |          |
| 2h  | 2.75E-05  | 6.94E-05 | 6.02E-05 | 1.15E-04 |
| 6h  | 1.23E-05  | 4.50E-05 | 1.04E-04 | 8.84E-05 |
| 12h | 7.76E-07  | 1.51E-07 | 6.10E-05 | 6.61E-06 |
| 24h | 9.38E-06  | 1.14E-05 | 4.30E-05 | 5.23E-06 |
| 36h | 7.51E-06  | 1.99E-06 | 1.35E-05 | 2.22E-05 |
| 48h | 1.72E-05  | 4.79E-06 | 2.12E-05 | 3.93E-05 |
| 72h | 6.69E-06  | 1.20E-06 | 1.74E-05 | 2.25E-05 |
|     | cgd7_1480 |          |          |          |
| 2h  | 8.34E-03  | 4.35E-03 | 2.48E-03 | 2.27E-02 |
| 6h  | 7.04E-03  | 3.90E-03 | 7.28E-03 | 3.04E-02 |
| 12h | 1.32E-04  | 4.21E-05 | 9.79E-04 | 1.47E-03 |
| 24h | 2.78E-03  | 1.63E-03 | 1.41E-03 | 4.93E-03 |
| 36h | 9.91E-04  | 5.53E-04 | 7.66E-04 | 4.48E-03 |
| 48h | 1.50E-03  | 1.06E-03 | 8.29E-04 | 9.78E-04 |
| 72h | 2.48E-03  | 8.64E-04 | 2.04E-03 | 7.23E-04 |
|     | cgd7_1490 |          |          |          |
| 2h  | 1.59E-05  | 1.37E-05 | 9.75E-06 | 1.55E-05 |
| 6h  | 3.24E-05  | 3.91E-05 | 4.93E-05 | 2.39E-05 |
| 12h | 3.61E-07  | 6.42E-07 | 3.18E-06 | 1.60E-06 |
| 24h | 5.93E-06  | 9.78E-06 | 1.47E-05 | 2.29E-06 |
| 36h | 2.64E-06  | 1.85E-06 | 3.21E-06 | 5.69E-06 |
| 48h | 4.10E-06  | 1.22E-06 | 2.07E-06 | 1.69E-06 |
| 72h | 1.18E-06  | 6.54E-07 | 2.32E-06 | 2.69E-06 |
|     | cgd7_1500 |          |          |          |
| 2h  | 1.19E-07  | 1.59E-08 | 0.00E+00 | 1.45E-06 |
| 6h  | 3.67E-08  | 3.41E-08 | 1.23E-07 | 2.26E-08 |
| 12h | 7.07E-09  | 1.92E-09 | 2.40E-08 | 9.86E-09 |
| 24h | 4.07E-08  | 2.35E-08 | 2.40E-08 | 1.74E-08 |
| 36h | 5.71E-08  | 4.80E-08 | 1.04E-07 | 7.06E-08 |
| 48h | 5.59E-07  | 1.07E-07 | 2.41E-07 | 5.86E-07 |
| 72h | 1.63E-06  | 6.48E-07 | 2.69E-06 | 2.39E-06 |
|     | cgd7_1510 |          |          |          |
| 2h  | 5.43E-07  | 4.55E-08 | 1.45E-08 | 1.47E-07 |
| 6h  | 2.83E-08  | 6.12E-08 | 4.35E-08 | 2.03E-07 |
| 12h | 6.27E-07  | 7.80E-07 | 1.71E-06 | 7.87E-07 |
| 24h | 1.22E-07  | 4.54E-07 | 1.42E-07 | 2.93E-08 |
| 36h | 3.11E-07  | 3.52E-07 | 9.48E-07 | 1.38E-06 |
| 48h | 4.38E-07  | 1.66E-07 | 1.87E-07 | 7.23E-07 |
| 72h | 1.13E-06  | 7.58E-07 | 1.96E-06 | 2.24E-06 |
|     | cgd7_1540 |          |          |          |
| 2h  | 6.83E-06  | 2.87E-06 | 3.55E-06 | 2.05E-05 |
| 6h  | 1.86E-06  | 1.35E-06 | 3.88E-06 | 3.21E-05 |
| 12h | 1.12E-06  | 1.77E-06 | 5.48E-06 | 4.39E-06 |
| 24h | 7.57E-07  | 1.49E-06 | 6.82E-06 | 1.29E-06 |
| 36h | 1.88E-06  | 1.39E-06 | 5.72E-06 | 1.94E-05 |
| 48h | 4.79E-06  | 1.45E-06 | 4.88E-06 | 9.11E-06 |
| 72h | 8.35E-07  | 1.17E-06 | 4.73E-06 | 1.04E-05 |
|     | cgd7_1550 |          |          |          |
| 2h  | 6.74E-05  | 3.64E-05 | 2.66E-05 | 1.58E-04 |
| 6h  | 2.82E-05  | 3.42E-05 | 1.08E-04 | 7.89E-05 |
| 12h | 5.42E-06  | 3.39E-06 | 2.12E-04 | 4.54E-05 |
| 24h | 1.65E-05  | 5.25E-05 | 9.95E-05 | 1.43E-05 |

|     |           |          |          |          |
|-----|-----------|----------|----------|----------|
| 36h | 1.57E-05  | 2.32E-05 | 6.16E-05 | 5.07E-05 |
| 48h | 2.08E-05  | 7.32E-06 | 3.07E-05 | 6.30E-05 |
| 72h | 8.34E-06  | 6.09E-06 | 1.59E-05 | 1.85E-05 |
|     | cgd7_1580 |          |          |          |
| 2h  | 2.40E-06  | 3.92E-07 | 3.47E-07 | 1.97E-06 |
| 6h  | 8.06E-07  | 1.03E-06 | 1.65E-06 | 1.89E-06 |
| 12h | 2.33E-07  | 4.90E-08 | 1.24E-06 | 4.89E-07 |
| 24h | 5.45E-07  | 7.08E-07 | 1.06E-06 | 3.49E-07 |
| 36h | 5.10E-07  | 1.21E-06 | 1.21E-06 | 1.53E-06 |
| 48h | 1.80E-06  | 2.98E-07 | 1.21E-06 | 2.32E-06 |
| 72h | 4.92E-07  | 9.94E-07 | 7.27E-07 | 1.20E-06 |
|     | cgd7_1610 |          |          |          |
| 2h  | 3.62E-06  | 1.10E-06 | 4.13E-07 | 5.94E-06 |
| 6h  | 1.47E-06  | 1.64E-06 | 5.53E-06 | 7.93E-06 |
| 12h | 5.72E-08  | 6.15E-08 | 2.07E-06 | 1.16E-06 |
| 24h | 7.28E-07  | 9.44E-07 | 9.51E-06 | 9.60E-07 |
| 36h | 1.38E-06  | 2.26E-06 | 2.89E-06 | 4.50E-06 |
| 48h | 1.34E-06  | 2.96E-07 | 1.36E-06 | 3.25E-06 |
| 72h | 1.32E-07  | 1.58E-07 | 1.59E-07 | 3.83E-07 |
|     | cgd7_1630 |          |          |          |
| 2h  | 4.44E-06  | 8.29E-07 | 1.36E-06 | 6.85E-06 |
| 6h  | 1.34E-06  | 3.14E-06 | 1.30E-05 | 1.12E-05 |
| 12h | 5.07E-09  | 2.20E-08 | 5.29E-06 | 4.13E-07 |
| 24h | 5.63E-07  | 3.94E-07 | 7.10E-06 | 1.20E-06 |
| 36h | 3.19E-07  | 6.41E-07 | 7.58E-07 | 2.72E-06 |
| 48h | 8.70E-07  | 2.34E-07 | 1.26E-06 | 1.80E-06 |
| 72h | 6.08E-08  | 3.89E-07 | 2.39E-06 | 7.16E-07 |
|     | cgd7_1640 |          |          |          |
| 2h  | 1.83E-06  | 5.88E-07 | 7.89E-07 | 3.95E-06 |
| 6h  | 1.92E-06  | 2.19E-06 | 6.14E-06 | 5.69E-06 |
| 12h | 2.91E-07  | 2.44E-07 | 4.27E-06 | 1.59E-06 |
| 24h | 7.71E-07  | 1.16E-06 | 6.70E-06 | 1.20E-06 |
| 36h | 9.25E-07  | 8.78E-07 | 1.36E-06 | 2.11E-06 |
| 48h | 3.53E-06  | 1.93E-07 | 1.26E-06 | 1.28E-06 |
| 72h | 1.13E-07  | 1.71E-07 | 3.03E-07 | 3.02E-07 |
|     | cgd7_1650 |          |          |          |
| 2h  | 2.44E-06  | 4.01E-07 | 3.19E-07 | 3.59E-06 |
| 6h  | 1.43E-06  | 1.62E-06 | 6.38E-06 | 6.61E-06 |
| 12h | 3.50E-05  | 1.79E-05 | 1.94E-04 | 7.92E-05 |
| 24h | 6.51E-06  | 1.18E-05 | 3.27E-05 | 1.15E-05 |
| 36h | 6.91E-06  | 1.23E-05 | 7.28E-05 | 9.60E-05 |
| 48h | 8.76E-06  | 9.74E-07 | 1.31E-05 | 2.35E-05 |
| 72h | 1.62E-06  | 5.65E-06 | 4.90E-06 | 7.66E-06 |
|     | cgd7_640  |          |          |          |
| 2h  | 8.68E-06  | 6.18E-07 | 7.66E-06 | 1.66E-06 |
| 6h  | 9.67E-07  | 3.29E-06 | 1.54E-06 | 2.77E-04 |
| 12h | 2.18E-06  | 4.15E-07 | 9.36E-07 | 4.08E-06 |
| 24h | 4.95E-06  | 1.06E-06 | 1.57E-06 | 1.07E-05 |
| 36h | 1.37E-06  | 1.21E-06 | 1.91E-06 | 3.03E-06 |
| 48h | 1.07E-06  | 6.62E-07 | 1.82E-06 | 1.34E-06 |
| 72h | 9.61E-07  | 8.55E-07 | 6.71E-07 | 1.11E-06 |
|     | cgd7_650  |          |          |          |
| 2h  | 1.93E-06  | 3.68E-08 | 1.80E-07 | 1.12E-06 |

|     |          |          |          |          |
|-----|----------|----------|----------|----------|
| 6h  | 5.18E-06 | 3.77E-05 | 7.63E-06 | 2.91E-05 |
| 12h | 9.37E-06 | 1.10E-06 | 4.76E-06 | 2.46E-05 |
| 24h | 1.62E-05 | 1.32E-05 | 1.32E-05 | 8.71E-05 |
| 36h | 1.29E-05 | 5.20E-06 | 1.63E-05 | 3.87E-05 |
| 48h | 4.24E-05 | 5.53E-06 | 1.95E-05 | 3.02E-05 |
| 72h | 4.60E-06 | 2.11E-06 | 2.55E-06 | 9.95E-06 |
|     | cgd7_660 |          |          |          |
| 2h  | 0.00E+00 | 0.00E+00 | 0.00E+00 | 0.00E+00 |
| 6h  | 0.00E+00 | 0.00E+00 | 4.66E-09 | 2.37E-09 |
| 12h | 8.51E-08 | 6.93E-09 | 7.76E-08 | 3.56E-06 |
| 24h | 6.21E-08 | 1.41E-08 | 2.29E-08 | 7.33E-08 |
| 36h | 9.59E-08 | 8.49E-08 | 2.00E-07 | 9.51E-08 |
| 48h | 2.42E-07 | 1.36E-07 | 1.88E-07 | 2.02E-07 |
| 72h | 8.60E-08 | 1.60E-07 | 4.47E-07 | 2.15E-07 |
|     | cgd7_670 |          |          |          |
| 2h  | 1.61E-07 | 6.31E-09 | 6.12E-08 | 3.46E-08 |
| 6h  | 7.48E-09 | 5.28E-08 | 9.52E-08 | 9.69E-08 |
| 12h | 1.47E-07 | 9.13E-08 | 1.40E-07 | 4.71E-07 |
| 24h | 3.35E-08 | 3.55E-08 | 5.55E-08 | 9.21E-08 |
| 36h | 9.39E-08 | 1.27E-07 | 1.95E-07 | 1.05E-07 |
| 48h | 2.76E-08 | 7.51E-08 | 2.87E-08 | 4.73E-08 |
| 72h | 5.96E-08 | 2.32E-08 | 1.35E-07 | 4.54E-08 |
|     | cgd7_680 |          |          |          |
| 2h  | 1.51E-08 | 2.32E-09 | 5.86E-08 | 2.64E-08 |
| 6h  | 0.00E+00 | 0.00E+00 | 1.62E-09 | 2.38E-08 |
| 12h | 6.67E-08 | 4.09E-08 | 1.73E-08 | 3.61E-08 |
| 24h | 3.17E-08 | 2.18E-08 | 2.11E-08 | 8.78E-08 |
| 36h | 6.81E-08 | 5.09E-08 | 5.47E-08 | 5.05E-08 |
| 48h | 1.91E-07 | 3.67E-07 | 2.19E-07 | 4.67E-07 |
| 72h | 7.11E-08 | 1.75E-07 | 6.01E-08 | 6.20E-08 |
|     | cgd7_690 |          |          |          |
| 2h  | 2.22E-07 | 7.19E-08 | 8.62E-08 | 4.03E-09 |
| 6h  | 2.63E-07 | 2.39E-07 | 6.82E-08 | 1.58E-06 |
| 12h | 3.39E-09 | 2.83E-08 | 5.13E-08 | 7.40E-08 |
| 24h | 1.62E-07 | 1.65E-07 | 1.65E-07 | 1.20E-06 |
| 36h | 2.41E-07 | 8.69E-08 | 1.49E-07 | 3.61E-07 |
| 48h | 1.52E-07 | 3.49E-08 | 2.04E-07 | 6.27E-07 |
| 72h | 1.29E-07 | 3.39E-07 | 2.05E-07 | 6.50E-07 |
|     | cgd7_700 |          |          |          |
| 2h  | 3.29E-08 | 0.00E+00 | 2.24E-09 | 3.87E-09 |
| 6h  | 2.31E-07 | 1.30E-07 | 1.76E-07 | 3.17E-07 |
| 12h | 3.00E-08 | 6.93E-09 | 4.67E-09 | 1.26E-08 |
| 24h | 6.97E-08 | 7.33E-08 | 1.72E-07 | 7.60E-08 |
| 36h | 5.79E-08 | 5.84E-08 | 2.43E-08 | 1.44E-07 |
| 48h | 6.64E-08 | 2.08E-08 | 5.75E-08 | 1.03E-07 |
| 72h | 4.35E-08 | 6.67E-08 | 9.69E-08 | 1.57E-07 |
|     | cgd7_720 |          |          |          |
| 2h  | 0.00E+00 | 0.00E+00 | 0.00E+00 | 0.00E+00 |
| 6h  | 0.00E+00 | 0.00E+00 | 1.38E-09 | 0.00E+00 |
| 12h | 1.15E-06 | 3.53E-07 | 8.52E-07 | 3.01E-06 |
| 24h | 8.43E-08 | 4.53E-08 | 9.79E-08 | 1.81E-07 |
| 36h | 1.47E-07 | 7.31E-07 | 4.87E-07 | 1.16E-07 |
| 48h | 1.17E-07 | 9.51E-08 | 3.23E-07 | 2.10E-07 |

|     |          |          |          |          |
|-----|----------|----------|----------|----------|
| 72h | 3.75E-08 | 2.17E-07 | 1.68E-07 | 3.82E-08 |
|     | cgd7_730 |          |          |          |
| 2h  | 0.00E+00 | 0.00E+00 | 0.00E+00 | 0.00E+00 |
| 6h  | 5.04E-06 | 1.33E-06 | 7.21E-07 | 9.27E-06 |
| 12h | 1.16E-07 | 3.61E-09 | 1.39E-09 | 2.29E-05 |
| 24h | 2.53E-07 | 3.58E-07 | 1.34E-06 | 9.83E-06 |
| 36h | 1.43E-06 | 5.27E-07 | 5.85E-07 | 1.19E-05 |
| 48h | 9.10E-07 | 2.32E-07 | 3.66E-07 | 1.09E-05 |
| 72h | 5.03E-07 | 2.60E-07 | 1.75E-07 | 6.94E-06 |
|     | cgd7_740 |          |          |          |
| 2h  | 2.12E-07 | 4.12E-09 | 1.66E-08 | 6.31E-07 |
| 6h  | 1.83E-08 | 2.49E-08 | 4.78E-08 | 8.29E-08 |
| 12h | 2.90E-09 | 2.65E-08 | 1.39E-08 | 5.37E-09 |
| 24h | 5.39E-08 | 4.24E-08 | 1.98E-07 | 1.38E-07 |
| 36h | 2.01E-07 | 4.80E-08 | 3.31E-07 | 1.41E-07 |
| 48h | 3.55E-07 | 8.58E-08 | 2.05E-07 | 2.00E-07 |
| 72h | 5.27E-08 | 6.08E-08 | 5.57E-08 | 1.08E-07 |
|     | cgd7_750 |          |          |          |
| 2h  | 2.93E-06 | 1.48E-07 | 1.19E-07 | 6.62E-07 |
| 6h  | 4.40E-08 | 9.28E-08 | 2.02E-07 | 3.08E-07 |
| 12h | 1.81E-07 | 7.16E-08 | 3.93E-07 | 1.63E-06 |
| 24h | 3.12E-07 | 4.59E-07 | 1.67E-06 | 8.25E-07 |
| 36h | 3.84E-06 | 2.38E-06 | 1.63E-06 | 1.03E-05 |
| 48h | 4.97E-06 | 1.51E-06 | 2.12E-06 | 8.54E-06 |
| 72h | 1.37E-06 | 9.07E-07 | 3.34E-07 | 1.86E-06 |
|     | cgd7_760 |          |          |          |
| 2h  | 1.28E-02 | 1.14E-02 | 3.47E-03 | 4.29E-01 |
| 6h  | 1.32E-02 | 1.00E-02 | 4.85E-03 | 1.23E-01 |
| 12h | 1.24E-02 | 8.54E-03 | 4.33E-03 | 2.59E-01 |
| 24h | 9.71E-03 | 1.14E-02 | 6.79E-03 | 7.06E-01 |
| 36h | 5.92E-04 | 1.25E-02 | 1.87E-03 | 0.00E+00 |
| 48h | 1.99E-03 | 3.31E-03 | 6.13E-04 | 0.00E+00 |
| 72h | 1.26E-03 | 1.89E-03 | 5.02E-04 | 1.01E-02 |
|     | cgd7_770 |          |          |          |
| 2h  | 0.00E+00 | 0.00E+00 | 0.00E+00 | 0.00E+00 |
| 6h  | 6.25E-05 | 4.03E-04 | 5.37E-05 | 0.00E+00 |
| 12h | 6.18E-05 | 1.29E-04 | 3.24E-04 | 1.07E-05 |
| 24h | 7.28E-05 | 4.39E-04 | 1.12E-03 | 9.25E-06 |
| 36h | 3.01E-04 | 2.44E-04 | 6.97E-04 | 3.78E-05 |
| 48h | 3.09E-04 | 2.33E-04 | 7.84E-04 | 4.24E-05 |
| 72h | 5.80E-04 | 2.97E-03 | 1.58E-03 | 4.67E-05 |
|     | cgd7_780 |          |          |          |
| 2h  | 0.00E+00 | 0.00E+00 | 0.00E+00 | 0.00E+00 |
| 6h  | 4.03E-06 | 5.13E-05 | 1.95E-05 | 2.52E-05 |
| 12h | 1.21E-04 | 7.16E-05 | 3.80E-05 | 9.14E-05 |
| 24h | 2.36E-05 | 1.23E-04 | 5.44E-05 | 8.76E-05 |
| 36h | 4.09E-05 | 6.09E-05 | 4.72E-05 | 7.56E-05 |
| 48h | 2.15E-05 | 4.84E-05 | 2.23E-05 | 2.48E-04 |
| 72h | 8.67E-06 | 7.84E-06 | 4.57E-06 | 4.62E-05 |
|     | cgd7_790 |          |          |          |
| 2h  | 6.30E-02 | 2.80E-02 | 3.03E-02 | 1.16E-02 |
| 6h  | 3.80E-02 | 4.68E-02 | 2.18E-02 | 6.71E-03 |
| 12h | 2.48E-02 | 4.35E-02 | 3.18E-02 | 2.88E-03 |

|     |          |          |          |          |
|-----|----------|----------|----------|----------|
| 24h | 2.13E-02 | 3.66E-02 | 1.69E-02 | 3.08E-03 |
| 36h | 6.16E-03 | 5.83E-03 | 3.97E-03 | 1.78E-03 |
| 48h | 4.30E-03 | 7.81E-03 | 2.89E-03 | 2.66E-03 |
| 72h | 1.54E-03 | 1.70E-03 | 1.13E-03 | 1.21E-03 |
|     | cgd7_820 |          |          |          |
| 2h  | 4.55E-07 | 8.11E-09 | 6.12E-07 | 8.52E-07 |
| 6h  | 1.23E-07 | 5.95E-07 | 2.91E-07 | 3.05E-07 |
| 12h | 9.19E-09 | 2.09E-07 | 1.86E-07 | 2.90E-08 |
| 24h | 1.39E-07 | 4.35E-07 | 2.14E-07 | 2.83E-08 |
| 36h | 1.33E-07 | 1.33E-07 | 2.01E-07 | 8.87E-08 |
| 48h | 3.79E-08 | 4.18E-08 | 3.58E-08 | 8.18E-08 |
| 72h | 2.45E-07 | 1.10E-07 | 1.60E-07 | 2.75E-07 |
|     | cgd7_830 |          |          |          |
| 2h  | 2.47E-03 | 3.41E-03 | 1.64E-03 | 1.64E-04 |
| 6h  | 1.05E-03 | 9.30E-04 | 4.47E-04 | 1.33E-04 |
| 12h | 2.98E-04 | 2.15E-03 | 1.26E-03 | 7.25E-05 |
| 24h | 7.65E-04 | 1.45E-03 | 5.97E-04 | 2.10E-05 |
| 36h | 4.54E-04 | 1.16E-04 | 3.35E-04 | 3.01E-05 |
| 48h | 1.37E-04 | 3.32E-04 | 6.87E-05 | 2.63E-05 |
| 72h | 3.23E-04 | 4.91E-04 | 4.24E-04 | 4.12E-05 |
|     | cgd7_840 |          |          |          |
| 2h  | 1.09E-08 | 0.00E+00 | 7.92E-09 | 0.00E+00 |
| 6h  | 0.00E+00 | 0.00E+00 | 7.08E-10 | 3.56E-09 |
| 12h | 0.00E+00 | 6.71E-09 | 4.41E-09 | 7.83E-10 |
| 24h | 3.14E-08 | 1.58E-08 | 1.56E-08 | 8.46E-09 |
| 36h | 1.39E-07 | 9.05E-07 | 7.21E-08 | 5.92E-08 |
| 48h | 3.11E-06 | 2.00E-05 | 6.47E-06 | 2.29E-05 |
| 72h | 3.16E-05 | 3.57E-05 | 2.60E-05 | 3.25E-05 |
|     | cgd7_860 |          |          |          |
| 2h  | 5.29E-03 | 1.55E-03 | 8.30E-03 | 8.03E-04 |
| 6h  | 2.15E-03 | 4.75E-04 | 1.15E-03 | 2.39E-04 |
| 12h | 1.50E-03 | 5.38E-03 | 1.81E-03 | 2.80E-04 |
| 24h | 3.23E-03 | 1.01E-03 | 1.41E-03 | 5.68E-05 |
| 36h | 8.11E-04 | 6.89E-04 | 4.91E-04 | 1.30E-04 |
| 48h | 1.58E-03 | 1.03E-03 | 1.14E-03 | 3.26E-04 |
| 72h | 2.31E-03 | 2.70E-03 | 2.01E-03 | 5.14E-04 |
|     | cgd7_880 |          |          |          |
| 2h  | 5.69E-07 | 2.46E-08 | 4.77E-07 | 1.63E-06 |
| 6h  | 2.80E-06 | 7.01E-06 | 4.04E-06 | 2.55E-06 |
| 12h | 6.75E-07 | 1.81E-06 | 2.13E-06 | 6.86E-07 |
| 24h | 1.68E-06 | 3.93E-06 | 3.13E-06 | 4.17E-07 |
| 36h | 1.74E-06 | 1.95E-06 | 1.61E-06 | 9.98E-07 |
| 48h | 1.57E-06 | 1.52E-06 | 1.30E-06 | 1.55E-06 |
| 72h | 2.23E-06 | 1.63E-06 | 1.58E-06 | 2.28E-06 |
|     | cgd7_900 |          |          |          |
| 2h  | 1.02E-09 | 0.00E+00 | 0.00E+00 | 0.00E+00 |
| 6h  | 4.93E-08 | 1.77E-07 | 2.46E-08 | 2.32E-08 |
| 12h | 1.94E-07 | 1.52E-07 | 1.53E-07 | 1.55E-07 |
| 24h | 1.54E-07 | 8.94E-07 | 6.63E-07 | 6.21E-08 |
| 36h | 5.48E-07 | 4.54E-07 | 5.22E-07 | 1.27E-07 |
| 48h | 3.20E-07 | 2.68E-07 | 2.86E-07 | 2.70E-07 |
| 72h | 1.91E-07 | 2.39E-07 | 1.20E-07 | 1.16E-07 |
|     | cgd7_910 |          |          |          |

|     |           |          |          |          |
|-----|-----------|----------|----------|----------|
| 2h  | 0.00E+00  | 0.00E+00 | 0.00E+00 | 0.00E+00 |
| 6h  | 0.00E+00  | 0.00E+00 | 0.00E+00 | 3.15E-07 |
| 12h | 5.84E-05  | 2.52E-04 | 2.57E-05 | 7.82E-05 |
| 24h | 5.24E-06  | 6.36E-06 | 5.97E-06 | 3.55E-06 |
| 36h | 8.98E-06  | 5.28E-05 | 2.76E-05 | 2.51E-05 |
| 48h | 2.27E-05  | 3.90E-05 | 1.07E-05 | 4.46E-05 |
| 72h | 3.18E-05  | 9.24E-05 | 1.72E-05 | 5.46E-05 |
|     | cgd7_920  |          |          |          |
| 2h  | 3.76E-05  | 3.12E-04 | 9.29E-05 | 5.86E-04 |
| 6h  | 6.99E-05  | 3.16E-04 | 4.33E-05 | 1.70E-04 |
| 12h | 9.40E-06  | 1.81E-04 | 4.03E-05 | 1.79E-05 |
| 24h | 2.14E-05  | 7.44E-05 | 3.97E-05 | 2.32E-05 |
| 36h | 2.21E-05  | 3.33E-05 | 2.05E-05 | 3.20E-05 |
| 48h | 1.69E-05  | 4.07E-05 | 1.17E-05 | 7.44E-05 |
| 72h | 2.63E-05  | 4.39E-05 | 8.60E-06 | 9.62E-05 |
|     | cgd7_930  |          |          |          |
| 2h  | 9.29E-04  | 4.84E-05 | 5.06E-03 | 7.28E-04 |
| 6h  | 6.86E-05  | 6.09E-04 | 3.34E-04 | 2.98E-04 |
| 12h | 7.35E-05  | 1.72E-03 | 1.47E-03 | 1.93E-04 |
| 24h | 9.47E-04  | 2.82E-03 | 4.96E-03 | 8.91E-05 |
| 36h | 2.42E-03  | 1.90E-03 | 4.44E-03 | 1.78E-04 |
| 48h | 6.56E-04  | 1.85E-03 | 4.49E-03 | 9.64E-05 |
| 72h | 1.08E-03  | 1.71E-03 | 2.37E-03 | 3.16E-04 |
|     | cgd7_1670 |          |          |          |
| 2h  | 0.00E+00  | 1.89E-08 | 0.00E+00 | 8.61E-07 |
| 6h  | 2.44E-05  | 2.30E-05 | 5.53E-05 | 5.86E-05 |
| 12h | 1.17E-04  | 2.64E-05 | 2.47E-05 | 3.51E-05 |
| 24h | 3.95E-05  | 1.07E-05 | 3.52E-05 | 3.94E-05 |
| 36h | 9.41E-05  | 1.80E-05 | 2.76E-05 | 3.02E-05 |
| 48h | 4.86E-05  | 1.36E-05 | 2.16E-05 | 2.02E-05 |
| 72h | 5.06E-05  | 6.56E-06 | 2.55E-05 | 1.46E-05 |
|     | cgd7_1680 |          |          |          |
| 2h  | 5.07E-04  | 2.08E-05 | 3.37E-06 | 4.73E-05 |
| 6h  | 3.50E-04  | 7.61E-05 | 3.97E-05 | 1.77E-04 |
| 12h | 2.72E-03  | 4.61E-04 | 1.42E-04 | 3.33E-04 |
| 24h | 1.41E-03  | 3.20E-04 | 8.67E-05 | 2.64E-04 |
| 36h | 4.43E-04  | 7.04E-05 | 7.77E-05 | 1.58E-04 |
| 48h | 1.80E-03  | 3.84E-04 | 3.87E-04 | 2.03E-04 |
| 72h | 3.94E-03  | 8.07E-04 | 8.25E-04 | 5.67E-04 |
|     | cgd7_1690 |          |          |          |
| 2h  | 2.37E-08  | 3.05E-09 | 1.09E-08 | 3.19E-08 |
| 6h  | 0.00E+00  | 3.54E-09 | 2.26E-09 | 2.25E-09 |
| 12h | 1.99E-07  | 4.97E-08 | 7.18E-08 | 9.79E-08 |
| 24h | 1.76E-07  | 1.24E-07 | 3.69E-08 | 4.07E-08 |
| 36h | 1.87E-07  | 3.42E-07 | 1.08E-07 | 1.96E-07 |
| 48h | 1.76E-05  | 2.76E-06 | 8.68E-06 | 3.39E-06 |
| 72h | 5.05E-05  | 1.07E-05 | 4.30E-05 | 2.40E-05 |
|     | cgd7_1700 |          |          |          |
| 2h  | 1.67E-05  | 3.24E-07 | 3.80E-07 | 4.81E-06 |
| 6h  | 1.01E-05  | 1.52E-05 | 1.72E-06 | 5.58E-06 |
| 12h | 1.90E-04  | 4.23E-05 | 1.73E-05 | 3.97E-05 |
| 24h | 4.38E-05  | 1.87E-05 | 5.83E-06 | 7.03E-06 |
| 36h | 6.39E-05  | 3.23E-05 | 2.13E-05 | 3.89E-05 |



|     |           |          |          |          |
|-----|-----------|----------|----------|----------|
| 48h | 5.47E-05  | 1.99E-05 | 1.00E-05 | 8.80E-06 |
| 72h | 2.89E-05  | 4.84E-06 | 7.43E-06 | 1.32E-05 |
|     | cgd7_1710 |          |          |          |
| 2h  | 1.08E-06  | 2.11E-07 | 5.15E-08 | 1.06E-07 |
| 6h  | 4.87E-06  | 4.72E-06 | 8.98E-07 | 3.22E-06 |
| 12h | 1.83E-06  | 5.98E-07 | 4.96E-07 | 6.42E-07 |
| 24h | 1.44E-06  | 7.15E-07 | 2.01E-06 | 2.70E-06 |
| 36h | 1.56E-06  | 1.28E-06 | 9.03E-07 | 1.03E-06 |
| 48h | 1.00E-06  | 3.95E-07 | 7.01E-07 | 4.84E-07 |
| 72h | 4.45E-07  | 4.65E-07 | 8.63E-07 | 8.03E-07 |
|     | cgd7_1720 |          |          |          |
| 2h  | 2.79E-05  | 4.20E-07 | 3.76E-08 | 1.19E-06 |
| 6h  | 1.59E-07  | 7.88E-09 | 0.00E+00 | 5.42E-07 |
| 12h | 2.63E-05  | 4.18E-06 | 1.79E-06 | 2.80E-06 |
| 24h | 9.41E-06  | 3.23E-06 | 7.77E-07 | 2.71E-06 |
| 36h | 1.20E-05  | 5.38E-06 | 1.89E-06 | 4.10E-06 |
| 48h | 1.92E-05  | 9.15E-06 | 9.98E-06 | 4.21E-06 |
| 72h | 1.84E-05  | 1.24E-05 | 1.02E-05 | 1.74E-05 |
|     | cgd7_1730 |          |          |          |
| 2h  | 1.77E-08  | 2.79E-08 | 1.01E-08 | 4.67E-08 |
| 6h  | 0.00E+00  | 0.00E+00 | 0.00E+00 | 2.64E-09 |
| 12h | 0.00E+00  | 0.00E+00 | 0.00E+00 | 4.13E-09 |
| 24h | 1.50E-08  | 2.18E-08 | 1.69E-09 | 1.70E-08 |
| 36h | 1.45E-08  | 4.72E-08 | 1.69E-07 | 2.01E-07 |
| 48h | 6.16E-05  | 1.91E-05 | 3.99E-05 | 3.80E-05 |
| 72h | 2.25E-05  | 2.36E-05 | 4.38E-05 | 2.42E-05 |
|     | cgd7_1750 |          |          |          |
| 2h  | 6.06E-04  | 1.11E-05 | 3.50E-06 | 3.69E-05 |
| 6h  | 3.91E-04  | 1.27E-05 | 8.31E-05 | 1.11E-04 |
| 12h | 2.28E-04  | 6.09E-05 | 2.60E-05 | 1.74E-05 |
| 24h | 6.23E-04  | 1.97E-05 | 1.14E-05 | 4.27E-05 |
| 36h | 4.92E-04  | 2.40E-05 | 7.99E-06 | 1.48E-05 |
| 48h | 4.79E-05  | 3.91E-05 | 2.50E-05 | 1.37E-05 |
| 72h | 1.42E-04  | 1.34E-05 | 8.72E-06 | 1.14E-05 |
|     | cgd7_1760 |          |          |          |
| 2h  | 6.07E-07  | 5.92E-07 | 1.64E-08 | 9.88E-07 |
| 6h  | 3.55E-06  | 7.49E-07 | 6.22E-07 | 1.01E-06 |
| 12h | 5.97E-07  | 2.12E-07 | 1.38E-07 | 1.13E-07 |
| 24h | 1.59E-06  | 2.43E-07 | 5.53E-07 | 7.50E-07 |
| 36h | 1.56E-06  | 9.91E-07 | 2.34E-07 | 3.20E-07 |
| 48h | 4.63E-06  | 8.13E-07 | 1.04E-06 | 7.66E-07 |
| 72h | 8.63E-07  | 4.33E-07 | 7.06E-07 | 6.08E-04 |
|     | cgd7_1770 |          |          |          |
| 2h  | 9.20E-08  | 3.29E-08 | 0.00E+00 | 2.59E-07 |
| 6h  | 3.59E-07  | 2.27E-07 | 1.52E-07 | 2.83E-07 |
| 12h | 1.18E-06  | 8.66E-07 | 5.32E-07 | 9.10E-07 |
| 24h | 4.14E-07  | 2.46E-07 | 4.24E-07 | 1.02E-06 |
| 36h | 8.35E-07  | 1.07E-06 | 4.00E-07 | 5.40E-07 |
| 48h | 2.41E-05  | 3.61E-07 | 7.41E-07 | 5.15E-07 |
| 72h | 2.78E-07  | 3.12E-07 | 2.06E-07 | 2.18E-07 |
|     | cgd7_1780 |          |          |          |
| 2h  | 1.23E-05  | 1.94E-06 | 4.81E-07 | 1.39E-05 |
| 6h  | 5.54E-06  | 1.47E-06 | 9.60E-07 | 4.75E-06 |

|     |           |          |          |          |
|-----|-----------|----------|----------|----------|
| 12h | 1.11E-06  | 7.12E-07 | 1.15E-06 | 2.73E-06 |
| 24h | 3.28E-06  | 1.87E-06 | 2.39E-06 | 3.09E-06 |
| 36h | 3.73E-06  | 3.12E-06 | 6.55E-07 | 6.09E-07 |
| 48h | 3.65E-06  | 9.04E-07 | 5.29E-07 | 1.35E-06 |
| 72h | 1.86E-06  | 5.59E-07 | 2.86E-07 | 3.86E-07 |
|     | cgd7_1790 |          |          |          |
| 2h  | 8.59E-09  | 1.80E-06 | 2.50E-07 | 1.89E-05 |
| 6h  | 0.00E+00  | 2.28E-06 | 8.49E-07 | 5.13E-06 |
| 12h | 1.38E-08  | 2.07E-07 | 6.15E-07 | 8.30E-06 |
| 24h | 1.29E-07  | 7.13E-06 | 1.95E-06 | 1.24E-05 |
| 36h | 6.49E-08  | 2.82E-06 | 1.70E-06 | 6.55E-06 |
| 48h | 3.77E-06  | 1.31E-06 | 6.13E-07 | 2.29E-06 |
| 72h | 3.11E-07  | 3.16E-07 | 5.65E-07 | 9.89E-07 |
|     | cgd7_940  |          |          |          |
| 2h  | 7.19E-04  | 1.93E-04 | 2.26E-04 | 1.45E-03 |
| 6h  | 1.17E-03  | 6.46E-04 | 2.37E-03 | 1.09E-03 |
| 12h | 6.47E-04  | 8.46E-04 | 1.12E-03 | 1.52E-03 |
| 24h | 8.68E-04  | 7.24E-04 | 1.38E-03 | 7.80E-04 |
| 36h | 5.58E-04  | 2.89E-04 | 3.16E-04 | 4.24E-04 |
| 48h | 2.28E-04  | 9.67E-05 | 1.58E-04 | 4.67E-04 |
| 72h | 2.47E-04  | 3.11E-05 | 4.39E-05 | 1.57E-04 |
|     | cgd7_950  |          |          |          |
| 2h  | 5.13E-09  | 3.57E-09 | 0.00E+00 | 3.58E-09 |
| 6h  | 9.33E-05  | 2.20E-05 | 4.66E-05 | 2.01E-05 |
| 12h | 2.05E-06  | 2.06E-06 | 1.53E-06 | 1.13E-06 |
| 24h | 5.18E-06  | 8.24E-06 | 3.15E-05 | 7.43E-06 |
| 36h | 5.82E-06  | 7.47E-06 | 5.71E-06 | 4.63E-06 |
| 48h | 3.85E-06  | 1.46E-06 | 5.96E-06 | 3.63E-06 |
| 72h | 2.67E-07  | 3.87E-07 | 4.03E-07 | 8.55E-07 |
|     | cgd7_960  |          |          |          |
| 2h  | 0.00E+00  | 0.00E+00 | 0.00E+00 | 3.82E-07 |
| 6h  | 0.00E+00  | 1.09E-06 | 0.00E+00 | 4.40E-07 |
| 12h | 8.90E-05  | 2.22E-04 | 2.28E-05 | 1.17E-05 |
| 24h | 8.95E-06  | 1.11E-05 | 1.35E-05 | 7.92E-06 |
| 36h | 4.30E-05  | 8.14E-06 | 5.10E-05 | 2.82E-05 |
| 48h | 3.83E-05  | 1.22E-05 | 6.89E-05 | 1.36E-05 |
| 72h | 1.04E-04  | 8.18E-06 | 1.47E-05 | 1.23E-05 |
|     | cgd7_970  |          |          |          |
| 2h  | 4.79E-09  | 6.25E-09 | 1.06E-09 | 6.66E-08 |
| 6h  | 5.45E-07  | 5.72E-08 | 1.16E-07 | 1.14E-07 |
| 12h | 4.31E-09  | 3.61E-08 | 1.18E-08 | 2.24E-08 |
| 24h | 4.79E-08  | 4.74E-08 | 4.36E-08 | 4.93E-08 |
| 36h | 4.82E-08  | 9.03E-08 | 5.34E-08 | 1.03E-07 |
| 48h | 5.76E-08  | 2.27E-08 | 9.14E-08 | 4.18E-08 |
| 72h | 7.30E-08  | 1.03E-07 | 9.76E-06 | 1.91E-07 |
|     | cgd7_980  |          |          |          |
| 2h  | 0.00E+00  | 0.00E+00 | 0.00E+00 | 0.00E+00 |
| 6h  | 0.00E+00  | 0.00E+00 | 0.00E+00 | 1.12E-08 |
| 12h | 9.25E-06  | 1.66E-05 | 1.15E-05 | 5.01E-06 |
| 24h | 4.30E-06  | 4.89E-06 | 1.88E-06 | 6.77E-06 |
| 36h | 1.59E-04  | 6.32E-06 | 8.68E-05 | 1.19E-05 |
| 48h | 2.85E-05  | 4.40E-06 | 1.26E-04 | 1.78E-05 |
| 72h | 4.88E-05  | 1.99E-05 | 3.09E-04 | 6.66E-05 |

|     |           |          |          |          |
|-----|-----------|----------|----------|----------|
|     | cgd7_1000 |          |          |          |
| 2h  | 9.50E-08  | 2.76E-08 | 0.00E+00 | 2.86E-07 |
| 6h  | 8.70E-08  | 8.35E-09 | 4.31E-08 | 5.73E-08 |
| 12h | 2.39E-07  | 1.71E-07 | 3.22E-07 | 2.77E-07 |
| 24h | 3.12E-07  | 5.71E-07 | 3.87E-07 | 1.10E-07 |
| 36h | 4.94E-07  | 2.60E-07 | 2.50E-07 | 3.36E-07 |
| 48h | 2.08E-06  | 6.75E-07 | 1.44E-06 | 8.70E-07 |
| 72h | 5.77E-06  | 4.61E-06 | 6.53E-06 | 8.86E-06 |
|     | cgd7_1020 |          |          |          |
| 2h  | 1.52E-05  | 3.82E-05 | 8.30E-05 | 5.28E-04 |
| 6h  | 6.30E-05  | 1.20E-05 | 4.05E-05 | 3.83E-05 |
| 12h | 4.09E-05  | 9.03E-06 | 1.61E-04 | 3.65E-05 |
| 24h | 4.31E-05  | 2.80E-05 | 2.40E-05 | 9.72E-06 |
| 36h | 3.95E-05  | 3.73E-05 | 1.39E-05 | 2.51E-05 |
| 48h | 2.73E-05  | 1.18E-05 | 9.49E-05 | 1.15E-05 |
| 72h | 1.20E-05  | 1.20E-05 | 1.35E-06 | 1.66E-05 |
|     | cgd7_1090 |          |          |          |
| 2h  | 9.14E-07  | 0.00E+00 | 7.80E-07 | 0.00E+00 |
| 6h  | 3.77E-04  | 8.83E-05 | 8.59E-04 | 7.02E-04 |
| 12h | 2.65E-04  | 1.55E-04 | 2.58E-04 | 1.57E-04 |
| 24h | 2.20E-04  | 1.74E-04 | 7.75E-04 | 4.26E-04 |
| 36h | 4.62E-04  | 5.45E-04 | 4.30E-04 | 7.24E-04 |
| 48h | 2.88E-04  | 2.43E-04 | 3.37E-04 | 3.05E-04 |
| 72h | 2.02E-04  | 8.72E-05 | 2.86E-04 | 1.68E-04 |
|     | cgd7_1110 |          |          |          |
| 2h  | 6.33E-07  | 6.35E-07 | 1.35E-07 | 5.80E-07 |
| 6h  | 2.20E-06  | 6.18E-07 | 2.67E-06 | 1.65E-06 |
| 12h | 1.54E-07  | 8.67E-07 | 8.00E-07 | 2.09E-07 |
| 24h | 5.47E-07  | 8.21E-07 | 8.69E-07 | 4.47E-07 |
| 36h | 5.63E-07  | 7.26E-07 | 6.09E-07 | 3.28E-07 |
| 48h | 3.65E-07  | 4.13E-07 | 2.71E-07 | 6.04E-07 |
| 72h | 1.41E-07  | 6.69E-08 | 1.32E-07 | 1.32E-07 |
|     | cgd7_1150 |          |          |          |
| 2h  | 3.90E-07  | 2.90E-07 | 6.58E-08 | 5.01E-07 |
| 6h  | 5.17E-07  | 1.19E-07 | 4.64E-07 | 7.31E-07 |
| 12h | 3.74E-08  | 2.19E-07 | 1.64E-07 | 8.75E-08 |
| 24h | 2.01E-07  | 2.52E-07 | 1.97E-07 | 1.54E-07 |
| 36h | 1.45E-07  | 2.04E-07 | 1.14E-07 | 1.23E-07 |
| 48h | 2.13E-07  | 5.87E-07 | 2.65E-07 | 4.45E-07 |
| 72h | 3.04E-07  | 2.21E-07 | 9.88E-07 | 2.86E-07 |
|     | cgd7_1160 |          |          |          |
| 2h  | 2.66E-06  | 2.82E-06 | 2.21E-07 | 1.83E-06 |
| 6h  | 6.76E-07  | 2.07E-07 | 4.83E-07 | 1.61E-06 |
| 12h | 5.32E-07  | 7.94E-08 | 8.03E-07 | 6.39E-07 |
| 24h | 6.30E-07  | 9.75E-07 | 4.98E-07 | 8.85E-07 |
| 36h | 8.94E-07  | 5.67E-07 | 9.09E-07 | 1.18E-06 |
| 48h | 5.45E-06  | 4.72E-07 | 8.75E-07 | 1.74E-06 |
| 72h | 2.08E-06  | 8.17E-07 | 4.00E-06 | 1.17E-05 |
|     | cgd7_1180 |          |          |          |
| 2h  | 2.00E-05  | 1.12E-06 | 5.83E-06 | 6.00E-06 |
| 6h  | 1.87E-06  | 1.03E-06 | 6.09E-06 | 1.31E-06 |
| 12h | 1.55E-06  | 4.92E-06 | 2.32E-05 | 1.41E-06 |
| 24h | 4.57E-06  | 4.30E-06 | 3.59E-06 | 1.27E-06 |

|     |           |          |          |          |
|-----|-----------|----------|----------|----------|
| 36h | 1.81E-06  | 1.33E-06 | 1.45E-06 | 2.12E-06 |
| 48h | 1.20E-06  | 6.90E-07 | 1.29E-06 | 9.33E-07 |
| 72h | 9.62E-07  | 7.90E-07 | 1.01E-06 | 7.20E-07 |
|     | cgd7_1190 |          |          |          |
| 2h  | 2.45E-07  | 2.15E-08 | 1.19E-07 | 7.02E-08 |
| 6h  | 3.17E-09  | 0.00E+00 | 0.00E+00 | 1.99E-09 |
| 12h | 1.12E-05  | 3.35E-05 | 2.82E-05 | 1.22E-05 |
| 24h | 2.65E-06  | 6.89E-06 | 1.06E-06 | 8.08E-07 |
| 36h | 3.94E-07  | 3.90E-07 | 3.16E-06 | 2.06E-06 |
| 48h | 3.17E-07  | 1.54E-07 | 1.87E-07 | 3.43E-07 |
| 72h | 1.05E-07  | 1.33E-07 | 1.51E-07 | 7.93E-08 |
|     | cgd7_1200 |          |          |          |
| 2h  | 2.27E-07  | 3.28E-09 | 1.51E-08 | 1.52E-08 |
| 6h  | 0.00E+00  | 3.42E-09 | 0.00E+00 | 1.01E-08 |
| 12h | 8.02E-06  | 2.72E-05 | 9.20E-06 | 5.29E-06 |
| 24h | 3.23E-06  | 5.62E-06 | 1.84E-06 | 7.77E-07 |
| 36h | 1.85E-06  | 1.66E-06 | 3.99E-06 | 2.81E-06 |
| 48h | 1.20E-06  | 4.62E-07 | 1.45E-06 | 1.20E-06 |
| 72h | 1.02E-06  | 7.23E-07 | 1.52E-06 | 9.78E-07 |
|     | cgd7_1220 |          |          |          |
| 2h  | 8.66E-06  | 9.80E-07 | 2.49E-06 | 3.53E-06 |
| 6h  | 9.16E-07  | 6.49E-07 | 7.88E-07 | 5.13E-07 |
| 12h | 3.58E-06  | 6.86E-06 | 7.45E-06 | 3.75E-06 |
| 24h | 5.82E-06  | 5.88E-06 | 3.90E-06 | 1.43E-06 |
| 36h | 2.09E-06  | 9.20E-07 | 1.32E-06 | 2.12E-06 |
| 48h | 4.50E-06  | 1.86E-06 | 1.28E-06 | 2.10E-05 |
| 72h | 1.21E-06  | 3.34E-07 | 3.59E-07 | 1.03E-06 |
|     | cgd7_1230 |          |          |          |
| 2h  | 5.10E-06  | 1.43E-06 | 1.91E-06 | 3.33E-06 |
| 6h  | 1.71E-06  | 4.99E-07 | 1.20E-07 | 6.12E-07 |
| 12h | 3.61E-07  | 1.47E-06 | 1.81E-06 | 1.14E-06 |
| 24h | 4.48E-06  | 1.56E-06 | 6.59E-07 | 6.89E-07 |
| 36h | 7.57E-07  | 6.52E-07 | 4.11E-07 | 7.88E-07 |
| 48h | 2.07E-07  | 2.00E-07 | 1.73E-07 | 3.20E-07 |
| 72h | 3.86E-07  | 1.96E-07 | 4.50E-07 | 4.62E-07 |
|     | cgd7_1240 |          |          |          |
| 2h  | 4.69E-07  | 1.82E-09 | 0.00E+00 | 1.03E-07 |
| 6h  | 0.00E+00  | 0.00E+00 | 0.00E+00 | 6.73E-10 |
| 12h | 4.21E-08  | 9.55E-08 | 2.46E-07 | 3.05E-08 |
| 24h | 1.48E-07  | 2.53E-07 | 3.03E-08 | 5.42E-08 |
| 36h | 1.53E-07  | 1.37E-07 | 1.04E-07 | 1.05E-07 |
| 48h | 1.60E-06  | 6.15E-07 | 6.50E-07 | 5.97E-07 |
| 72h | 4.72E-06  | 1.72E-06 | 4.17E-06 | 2.56E-06 |
|     | cgd7_1250 |          |          |          |
| 2h  | 7.49E-08  | 2.07E-08 | 0.00E+00 | 3.49E-07 |
| 6h  | 0.00E+00  | 5.83E-09 | 2.27E-08 | 2.92E-09 |
| 12h | 1.71E-07  | 5.22E-07 | 2.94E-07 | 1.10E-07 |
| 24h | 1.75E-07  | 9.16E-07 | 8.26E-08 | 5.10E-08 |
| 36h | 2.19E-07  | 1.49E-07 | 2.35E-07 | 4.42E-07 |
| 48h | 2.03E-06  | 1.53E-06 | 5.35E-07 | 1.99E-06 |
| 72h | 2.47E-06  | 7.35E-07 | 3.65E-06 | 2.36E-06 |
|     | cgd7_1260 |          |          |          |
| 2h  | 2.01E-06  | 7.96E-08 | 4.86E-08 | 5.14E-07 |

|           |          |          |          |          |
|-----------|----------|----------|----------|----------|
| 6h        | 0.00E+00 | 2.43E-07 | 1.45E-07 | 1.13E-07 |
| 12h       | 1.77E-05 | 3.07E-05 | 8.88E-06 | 9.20E-06 |
| 24h       | 2.87E-06 | 8.88E-06 | 2.20E-06 | 6.46E-07 |
| 36h       | 8.93E-06 | 3.35E-06 | 1.38E-05 | 1.50E-05 |
| 48h       | 2.38E-05 | 4.68E-06 | 5.67E-06 | 4.44E-06 |
| 72h       | 1.32E-05 | 3.35E-06 | 7.33E-06 | 7.37E-06 |
| cgd7_1270 |          |          |          |          |
| 2h        | 0.00E+00 | 0.00E+00 | 0.00E+00 | 1.56E-09 |
| 6h        | 5.50E-09 | 0.00E+00 | 7.92E-09 | 0.00E+00 |
| 12h       | 6.22E-07 | 2.53E-06 | 7.12E-07 | 4.38E-07 |
| 24h       | 2.89E-07 | 4.61E-07 | 7.92E-07 | 2.59E-07 |
| 36h       | 1.08E-06 | 6.82E-07 | 1.21E-06 | 1.13E-06 |
| 48h       | 5.35E-07 | 2.27E-07 | 3.48E-07 | 3.25E-07 |
| 72h       | 3.91E-07 | 4.40E-07 | 1.23E-06 | 4.01E-07 |
| cgd7_1280 |          |          |          |          |
| 2h        | 8.98E-06 | 1.45E-06 | 7.73E-07 | 1.97E-06 |
| 6h        | 3.00E-05 | 1.23E-04 | 2.61E-04 | 6.52E-05 |
| 12h       | 5.56E-04 | 9.51E-04 | 2.89E-04 | 1.13E-04 |
| 24h       | 1.43E-04 | 1.57E-04 | 1.80E-04 | 7.91E-05 |
| 36h       | 1.31E-04 | 9.04E-05 | 1.73E-04 | 1.34E-04 |
| 48h       | 1.79E-03 | 5.91E-05 | 7.50E-05 | 6.54E-05 |
| 72h       | 7.10E-06 | 5.20E-06 | 4.36E-06 | 4.53E-06 |
| cgd7_1290 |          |          |          |          |
| 2h        | 0.00E+00 | 0.00E+00 | 0.00E+00 | 0.00E+00 |
| 6h        | 0.00E+00 | 3.64E-07 | 0.00E+00 | 0.00E+00 |
| 12h       | 0.00E+00 | 0.00E+00 | 3.06E-06 | 1.26E-06 |
| 24h       | 1.65E-05 | 1.04E-05 | 2.96E-05 | 5.10E-06 |
| 36h       | 7.47E-05 | 1.45E-04 | 8.05E-05 | 6.43E-05 |
| 48h       | 1.48E-03 | 2.22E-03 | 3.68E-03 | 5.20E-03 |
| 72h       | 6.75E-05 | 2.74E-04 | 2.78E-04 | 9.00E-05 |
| cgd7_1300 |          |          |          |          |
| 2h        | 2.07E-08 | 2.63E-08 | 5.40E-09 | 0.00E+00 |
| 6h        | 8.24E-08 | 2.00E-07 | 1.81E-07 | 2.51E-07 |
| 12h       | 4.12E-07 | 4.69E-07 | 5.61E-07 | 7.35E-07 |
| 24h       | 2.74E-07 | 2.91E-04 | 4.13E-07 | 2.84E-07 |
| 36h       | 5.55E-07 | 5.83E-07 | 4.65E-07 | 9.19E-07 |
| 48h       | 2.98E-07 | 1.60E-07 | 1.11E-07 | 4.24E-07 |
| 72h       | 1.83E-07 | 1.83E-07 | 2.58E-07 | 1.35E-07 |
| cgd7_1320 |          |          |          |          |
| 2h        | 0.00E+00 | 8.89E-06 | 5.92E-07 | 8.34E-06 |
| 6h        | 2.57E-05 | 1.50E-06 | 5.63E-06 | 3.68E-06 |
| 12h       | 7.70E-06 | 2.18E-06 | 3.04E-05 | 2.26E-06 |
| 24h       | 3.04E-05 | 1.06E-06 | 5.21E-06 | 6.69E-06 |
| 36h       | 1.38E-05 | 7.37E-07 | 1.38E-05 | 5.86E-06 |
| 48h       | 5.33E-05 | 2.04E-06 | 9.20E-05 | 3.92E-06 |
| 72h       | 4.25E-05 | 2.39E-06 | 1.16E-05 | 7.32E-06 |
| cgd7_1350 |          |          |          |          |
| 2h        | 8.21E-09 | 2.38E-09 | 0.00E+00 | 2.45E-08 |
| 6h        | 1.02E-08 | 0.00E+00 | 0.00E+00 | 1.53E-08 |
| 12h       | 4.51E-07 | 4.65E-07 | 1.65E-07 | 1.89E-07 |
| 24h       | 2.72E-07 | 1.05E-07 | 1.77E-07 | 7.36E-08 |
| 36h       | 7.17E-07 | 1.49E-07 | 9.30E-07 | 4.06E-07 |
| 48h       | 1.73E-06 | 5.32E-07 | 1.64E-06 | 4.51E-07 |

|     |           |          |          |          |
|-----|-----------|----------|----------|----------|
| 72h | 4.91E-07  | 2.02E-07 | 4.80E-07 | 2.75E-07 |
|     | cgd7_1370 |          |          |          |
| 2h  | 2.17E-04  | 4.81E-06 | 5.36E-06 | 7.30E-05 |
| 6h  | 1.86E-04  | 2.16E-05 | 1.83E-04 | 1.15E-04 |
| 12h | 1.17E-03  | 7.58E-05 | 5.17E-04 | 2.06E-04 |
| 24h | 4.20E-04  | 4.93E-05 | 3.06E-04 | 1.85E-04 |
| 36h | 1.40E-04  | 1.19E-05 | 3.37E-04 | 6.36E-05 |
| 48h | 3.97E-04  | 7.76E-06 | 1.68E-04 | 6.66E-05 |
| 72h | 1.39E-04  | 4.75E-06 | 1.22E-04 | 3.80E-05 |
|     | cgd7_1380 |          |          |          |
| 2h  | 0.00E+00  | 1.31E-06 | 2.20E-07 | 4.33E-06 |
| 6h  | 8.77E-06  | 3.92E-06 | 7.47E-06 | 1.28E-05 |
| 12h | 1.89E-05  | 2.96E-06 | 9.42E-06 | 7.32E-06 |
| 24h | 7.45E-06  | 1.29E-06 | 8.04E-06 | 2.91E-06 |
| 36h | 4.33E-06  | 1.77E-06 | 3.09E-06 | 3.24E-06 |
| 48h | 2.84E-06  | 1.50E-07 | 2.02E-06 | 1.09E-06 |
| 72h | 1.53E-06  | 6.25E-07 | 1.90E-06 | 7.69E-07 |
|     | cgd7_1390 |          |          |          |
| 2h  | 2.66E-07  | 3.63E-07 | 4.50E-07 | 1.63E-06 |
| 6h  | 1.94E-06  | 1.01E-06 | 1.16E-06 | 5.16E-06 |
| 12h | 6.87E-06  | 4.12E-06 | 7.82E-06 | 1.06E-05 |
| 24h | 4.56E-06  | 9.17E-07 | 2.84E-06 | 1.58E-06 |
| 36h | 1.63E-06  | 7.57E-07 | 2.75E-06 | 2.89E-06 |
| 48h | 1.26E-06  | 1.55E-07 | 8.83E-07 | 8.70E-07 |
| 72h | 1.04E-06  | 3.07E-07 | 5.65E-07 | 8.41E-07 |
|     | cgd7_1400 |          |          |          |
| 2h  | 2.04E-06  | 2.97E-07 | 7.47E-08 | 3.36E-06 |
| 6h  | 1.73E-06  | 4.84E-07 | 1.46E-06 | 2.39E-06 |
| 12h | 7.36E-06  | 2.92E-06 | 7.88E-06 | 6.78E-06 |
| 24h | 3.68E-06  | 1.18E-06 | 3.34E-06 | 2.82E-06 |
| 36h | 4.63E-06  | 2.29E-06 | 7.30E-06 | 5.25E-06 |
| 48h | 2.11E-06  | 6.40E-07 | 3.07E-06 | 2.32E-06 |
| 72h | 7.43E-07  | 6.31E-07 | 7.03E-07 | 6.43E-07 |
|     | cgd7_1410 |          |          |          |
| 2h  | 1.01E-06  | 3.78E-07 | 3.79E-07 | 3.94E-06 |
| 6h  | 7.42E-07  | 2.30E-07 | 3.83E-07 | 1.22E-06 |
| 12h | 7.20E-07  | 4.34E-07 | 1.48E-06 | 9.93E-07 |
| 24h | 7.63E-07  | 3.38E-07 | 6.00E-07 | 6.37E-07 |
| 36h | 4.39E-07  | 2.41E-07 | 2.65E-07 | 2.87E-07 |
| 48h | 3.38E-07  | 4.53E-08 | 2.33E-07 | 1.47E-07 |
| 72h | 3.05E-06  | 3.83E-06 | 7.97E-06 | 1.00E-05 |
|     | cgd7_1420 |          |          |          |
| 2h  | 7.09E-03  | 1.54E-03 | 7.84E-03 | 2.36E-02 |
| 6h  | 1.33E-02  | 4.84E-04 | 9.32E-03 | 9.53E-03 |
| 12h | 1.83E-02  | 4.86E-03 | 2.15E-02 | 5.95E-03 |
| 24h | 2.20E-03  | 7.57E-04 | 5.97E-03 | 4.95E-03 |
| 36h | 1.51E-04  | 9.39E-04 | 6.18E-03 | 2.25E-03 |
| 48h | 1.31E-03  | 2.06E-04 | 1.14E-03 | 2.51E-03 |
| 72h | 8.95E-04  | 2.53E-04 | 3.79E-03 | 5.47E-04 |
|     | cgd7_1430 |          |          |          |
| 2h  | 1.00E-04  | 8.80E-06 | 2.33E-07 | 2.40E-05 |
| 6h  | 1.17E-03  | 1.05E-04 | 7.24E-04 | 8.26E-04 |
| 12h | 3.34E-04  | 1.65E-05 | 7.06E-05 | 7.14E-05 |

|           |          |          |          |          |
|-----------|----------|----------|----------|----------|
| 24h       | 4.51E-04 | 4.59E-05 | 7.34E-04 | 3.44E-04 |
| 36h       | 8.97E-04 | 1.16E-04 | 5.63E-04 | 2.78E-04 |
| 48h       | 8.88E-04 | 8.08E-05 | 5.90E-04 | 2.84E-04 |
| 72h       | 6.54E-04 | 3.08E-05 | 1.86E-04 | 8.93E-05 |
| cgd7_1440 |          |          |          |          |
| 2h        | 1.88E-07 | 6.04E-08 | 2.45E-08 | 1.09E-07 |
| 6h        | 7.65E-08 | 3.52E-08 | 7.25E-08 | 1.68E-07 |
| 12h       | 9.27E-08 | 3.06E-09 | 1.16E-07 | 1.08E-07 |
| 24h       | 1.46E-07 | 7.11E-08 | 8.16E-07 | 7.34E-07 |
| 36h       | 8.14E-07 | 2.07E-07 | 5.58E-07 | 1.76E-07 |
| 48h       | 1.59E-06 | 4.79E-07 | 2.01E-06 | 1.25E-06 |
| 72h       | 7.66E-07 | 3.37E-07 | 7.51E-07 | 1.93E-07 |
| cgd7_1450 |          |          |          |          |
| 2h        | 0.00E+00 | 2.19E-06 | 2.12E-07 | 2.52E-06 |
| 6h        | 7.44E-07 | 5.30E-07 | 8.29E-07 | 2.40E-06 |
| 12h       | 4.12E-07 | 1.79E-07 | 1.79E-06 | 1.12E-06 |
| 24h       | 9.77E-07 | 6.12E-07 | 2.19E-06 | 1.40E-06 |
| 36h       | 1.07E-06 | 1.43E-06 | 9.88E-07 | 6.13E-07 |
| 48h       | 1.18E-06 | 5.09E-07 | 1.09E-06 | 7.60E-07 |
| 72h       | 1.65E-06 | 4.15E-07 | 1.09E-06 | 6.63E-07 |
| cgd7_1460 |          |          |          |          |
| 2h        | 0.00E+00 | 0.00E+00 | 0.00E+00 | 4.08E-04 |
| 6h        | 6.40E-04 | 1.16E-04 | 4.72E-04 | 1.62E-03 |
| 12h       | 8.84E-05 | 3.86E-05 | 2.69E-04 | 1.19E-04 |
| 24h       | 4.39E-04 | 3.21E-02 | 4.54E-04 | 2.33E-04 |
| 36h       | 8.67E-04 | 7.40E-05 | 1.27E-04 | 1.12E-04 |
| 48h       | 1.06E-04 | 7.15E-06 | 1.58E-04 | 4.81E-05 |
| 72h       | 1.40E-04 | 1.05E-05 | 4.34E-05 | 3.42E-05 |
| cgd7_4070 |          |          |          |          |
| 2h        | 3.16E-08 | 2.81E-08 | 5.22E-09 | 2.71E-09 |
| 6h        | 2.59E-06 | 2.60E-06 | 2.77E-06 | 1.92E-06 |
| 12h       | 1.64E-07 | 3.78E-07 | 6.30E-08 | 1.26E-07 |
| 24h       | 2.65E-07 | 6.12E-07 | 2.28E-06 | 6.16E-07 |
| 36h       | 5.76E-07 | 9.11E-07 | 5.58E-07 | 1.07E-06 |
| 48h       | 2.63E-07 | 5.04E-07 | 6.15E-07 | 5.35E-07 |
| 72h       | 1.19E-07 | 2.22E-07 | 8.08E-08 | 3.39E-07 |
| cgd7_4080 |          |          |          |          |
| 2h        | 1.44E-07 | 1.43E-07 | 1.54E-09 | 4.81E-08 |
| 6h        | 1.33E-05 | 2.82E-05 | 2.66E-05 | 1.25E-05 |
| 12h       | 7.43E-07 | 1.28E-05 | 1.50E-06 | 1.16E-06 |
| 24h       | 1.65E-06 | 1.08E-05 | 3.19E-05 | 1.19E-05 |
| 36h       | 6.11E-06 | 1.74E-05 | 9.12E-06 | 1.34E-05 |
| 48h       | 5.28E-06 | 9.75E-06 | 6.92E-06 | 8.98E-06 |
| 72h       | 1.02E-06 | 1.74E-06 | 2.54E-06 | 3.78E-06 |
| cgd7_4100 |          |          |          |          |
| 2h        | 5.06E-08 | 4.36E-06 | 0.00E+00 | 4.94E-07 |
| 6h        | 5.46E-05 | 9.62E-04 | 3.38E-04 | 1.66E-04 |
| 12h       | 5.96E-05 | 1.32E-03 | 1.17E-04 | 8.78E-05 |
| 24h       | 2.80E-05 | 3.59E-04 | 4.08E-04 | 2.37E-04 |
| 36h       | 1.18E-04 | 6.58E-04 | 3.99E-04 | 6.48E-04 |
| 48h       | 7.19E-05 | 3.88E-04 | 2.49E-04 | 3.22E-04 |
| 72h       | 2.13E-05 | 1.24E-04 | 4.87E-05 | 5.59E-05 |
| cgd7_4110 |          |          |          |          |

|     |           |          |          |          |
|-----|-----------|----------|----------|----------|
| 2h  | 5.08E-06  | 1.40E-06 | 3.60E-06 | 1.81E-06 |
| 6h  | 5.76E-07  | 2.30E-06 | 1.29E-07 | 9.84E-07 |
| 12h | 1.51E-06  | 2.15E-06 | 2.50E-06 | 1.42E-06 |
| 24h | 1.50E-06  | 5.92E-06 | 3.44E-06 | 1.20E-06 |
| 36h | 3.30E-06  | 1.84E-06 | 1.67E-06 | 1.13E-06 |
| 48h | 7.83E-07  | 4.29E-07 | 8.04E-07 | 8.68E-07 |
| 72h | 2.19E-07  | 6.22E-07 | 1.12E-06 | 7.49E-07 |
|     | cgd7_4120 |          |          |          |
| 2h  | 2.24E-07  | 2.08E-08 | 9.27E-09 | 1.96E-07 |
| 6h  | 0.00E+00  | 7.93E-08 | 8.23E-09 | 1.38E-09 |
| 12h | 3.89E-07  | 1.28E-06 | 7.57E-07 | 7.10E-07 |
| 24h | 5.84E-08  | 8.36E-07 | 2.47E-07 | 9.22E-08 |
| 36h | 3.28E-07  | 3.94E-07 | 1.50E-06 | 1.08E-06 |
| 48h | 2.07E-07  | 1.75E-07 | 1.31E-07 | 2.72E-07 |
| 72h | 1.26E-07  | 1.57E-07 | 1.24E-07 | 1.35E-07 |
|     | cgd7_4130 |          |          |          |
| 2h  | 4.88E-07  | 2.68E-07 | 2.87E-07 | 2.46E-07 |
| 6h  | 1.11E-07  | 2.12E-07 | 1.64E-07 | 1.57E-07 |
| 12h | 4.82E-07  | 3.38E-07 | 4.45E-07 | 2.89E-07 |
| 24h | 1.73E-07  | 2.07E-06 | 5.43E-07 | 3.05E-07 |
| 36h | 5.24E-07  | 9.04E-07 | 6.00E-07 | 6.10E-07 |
| 48h | 1.04E-07  | 3.93E-07 | 3.84E-07 | 2.74E-07 |
| 72h | 9.18E-08  | 3.22E-07 | 3.40E-07 | 6.30E-07 |
|     | cgd7_4140 |          |          |          |
| 2h  | 1.10E-05  | 3.31E-05 | 1.83E-05 | 7.48E-05 |
| 6h  | 5.85E-06  | 1.01E-04 | 3.94E-05 | 4.40E-05 |
| 12h | 1.24E-06  | 1.98E-06 | 8.61E-06 | 8.23E-06 |
| 24h | 1.05E-06  | 4.00E-05 | 6.89E-05 | 4.26E-05 |
| 36h | 1.78E-05  | 7.62E-05 | 4.28E-05 | 3.40E-05 |
| 48h | 1.04E-05  | 6.82E-05 | 4.07E-05 | 6.80E-05 |
| 72h | 4.43E-06  | 1.38E-05 | 1.63E-05 | 1.57E-04 |
|     | cgd7_4150 |          |          |          |
| 2h  | 9.34E-07  | 0.00E+00 | 4.13E-06 | 1.79E-06 |
| 6h  | 1.20E-05  | 5.69E-04 | 4.35E-04 | 1.90E-04 |
| 12h | 7.85E-06  | 9.07E-05 | 1.42E-05 | 2.63E-05 |
| 24h | 6.61E-06  | 1.77E-04 | 3.22E-04 | 1.16E-04 |
| 36h | 1.63E-04  | 2.94E-04 | 2.12E-04 | 2.52E-04 |
| 48h | 7.85E-05  | 1.89E-04 | 3.69E-04 | 3.62E-04 |
| 72h | 1.83E-05  | 7.67E-05 | 3.35E-05 | 1.03E-04 |
|     | cgd7_4160 |          |          |          |
| 2h  | 1.35E-08  | 6.41E-09 | 0.00E+00 | 6.76E-09 |
| 6h  | 4.16E-07  | 2.12E-06 | 2.65E-06 | 8.68E-07 |
| 12h | 4.00E-07  | 7.93E-07 | 3.47E-07 | 2.20E-07 |
| 24h | 1.46E-07  | 7.50E-07 | 3.77E-06 | 1.31E-06 |
| 36h | 2.23E-06  | 1.75E-06 | 3.24E-06 | 2.27E-06 |
| 48h | 1.12E-06  | 9.60E-07 | 2.69E-06 | 1.47E-06 |
| 72h | 8.46E-08  | 4.49E-07 | 2.03E-07 | 3.12E-07 |
|     | cgd7_4170 |          |          |          |
| 2h  | 0.00E+00  | 0.00E+00 | 0.00E+00 | 2.88E-08 |
| 6h  | 0.00E+00  | 3.64E-08 | 7.04E-07 | 8.04E-08 |
| 12h | 2.33E-06  | 1.97E-05 | 3.32E-06 | 2.58E-06 |
| 24h | 8.40E-07  | 7.33E-06 | 8.37E-06 | 2.94E-06 |
| 36h | 4.68E-06  | 1.57E-05 | 1.93E-05 | 2.07E-05 |



|     |           |          |          |          |
|-----|-----------|----------|----------|----------|
| 48h | 8.16E-06  | 8.08E-06 | 1.29E-05 | 1.61E-05 |
| 72h | 1.43E-06  | 5.77E-06 | 1.44E-06 | 5.16E-06 |
|     | cgd7_4180 |          |          |          |
| 2h  | 2.51E-08  | 2.72E-08 | 3.11E-09 | 8.92E-08 |
| 6h  | 2.46E-07  | 1.05E-06 | 2.00E-06 | 1.39E-06 |
| 12h | 2.12E-07  | 2.66E-08 | 1.49E-07 | 1.07E-07 |
| 24h | 2.05E-07  | 4.54E-07 | 1.58E-06 | 5.96E-07 |
| 36h | 1.31E-06  | 1.73E-06 | 1.69E-06 | 1.28E-06 |
| 48h | 2.04E-06  | 1.05E-06 | 1.58E-06 | 1.84E-06 |
| 72h | 2.14E-07  | 4.22E-07 | 5.42E-07 | 5.25E-07 |
|     | cgd7_4190 |          |          |          |
| 2h  | 0.00E+00  | 8.75E-07 | 2.90E-06 | 4.23E-06 |
| 6h  | 2.36E-06  | 4.98E-06 | 8.92E-06 | 4.47E-06 |
| 12h | 8.43E-07  | 5.60E-07 | 2.54E-06 | 2.63E-06 |
| 24h | 1.48E-06  | 1.87E-06 | 8.66E-06 | 3.56E-06 |
| 36h | 1.02E-05  | 5.68E-06 | 3.61E-06 | 2.57E-06 |
| 48h | 4.88E-06  | 1.23E-06 | 2.00E-06 | 3.31E-06 |
| 72h | 3.61E-07  | 9.06E-07 | 1.99E-07 | 3.52E-07 |
|     | cgd7_4200 |          |          |          |
| 2h  | 1.25E-05  | 2.91E-05 | 1.70E-05 | 3.44E-05 |
| 6h  | 9.01E-05  | 1.07E-05 | 4.58E-05 | 7.11E-06 |
| 12h | 1.20E-06  | 2.55E-07 | 1.00E-05 | 6.49E-06 |
| 24h | 3.64E-05  | 3.57E-06 | 2.16E-05 | 7.21E-06 |
| 36h | 1.69E-05  | 3.91E-06 | 6.48E-06 | 8.22E-06 |
| 48h | 7.98E-06  | 3.32E-06 | 9.01E-06 | 7.07E-06 |
| 72h | 6.78E-06  | 6.68E-07 | 3.14E-06 | 6.38E-06 |
|     | cgd7_4210 |          |          |          |
| 2h  | 0.00E+00  | 2.38E-08 | 0.00E+00 | 0.00E+00 |
| 6h  | 2.47E-05  | 8.00E-06 | 2.49E-05 | 2.49E-06 |
| 12h | 8.66E-07  | 2.48E-06 | 1.11E-06 | 3.20E-07 |
| 24h | 2.19E-06  | 1.46E-06 | 9.15E-06 | 3.73E-06 |
| 36h | 5.55E-06  | 2.92E-06 | 3.17E-06 | 3.19E-06 |
| 48h | 2.72E-06  | 1.55E-06 | 2.26E-06 | 1.79E-06 |
| 72h | 9.06E-07  | 4.28E-07 | 6.87E-07 | 1.18E-06 |
|     | cgd7_4220 |          |          |          |
| 2h  | 1.80E-06  | 6.21E-07 | 6.73E-07 | 1.18E-06 |
| 6h  | 3.22E-05  | 1.14E-05 | 2.92E-05 | 1.75E-05 |
| 12h | 4.80E-07  | 1.97E-07 | 5.29E-06 | 4.44E-07 |
| 24h | 2.96E-06  | 4.83E-06 | 1.27E-05 | 5.96E-06 |
| 36h | 4.04E-06  | 4.09E-06 | 3.43E-06 | 4.22E-06 |
| 48h | 2.81E-06  | 1.18E-06 | 2.94E-06 | 7.11E-07 |
| 72h | 6.96E-07  | 3.28E-07 | 7.14E-07 | 5.96E-07 |
|     | cgd7_4230 |          |          |          |
| 2h  | 1.70E-07  | 4.36E-07 | 7.88E-08 | 1.85E-07 |
| 6h  | 2.92E-06  | 2.14E-06 | 6.09E-06 | 1.27E-06 |
| 12h | 1.86E-07  | 7.97E-07 | 3.51E-07 | 2.12E-07 |
| 24h | 6.59E-07  | 6.62E-07 | 3.44E-06 | 8.63E-07 |
| 36h | 1.17E-06  | 2.87E-06 | 1.42E-06 | 2.49E-06 |
| 48h | 1.90E-06  | 8.67E-07 | 1.23E-05 | 9.40E-07 |
| 72h | 1.10E-06  | 6.44E-07 | 7.02E-07 | 7.26E-07 |
|     | cgd7_4240 |          |          |          |
| 2h  | 2.56E-07  | 1.12E-07 | 0.00E+00 | 1.90E-07 |
| 6h  | 1.06E-06  | 8.97E-07 | 3.59E-06 | 5.89E-07 |

|     |           |          |          |          |
|-----|-----------|----------|----------|----------|
| 12h | 6.53E-08  | 1.62E-07 | 3.22E-07 | 6.02E-08 |
| 24h | 1.75E-07  | 2.27E-07 | 1.53E-06 | 6.64E-07 |
| 36h | 4.19E-07  | 7.62E-07 | 6.77E-07 | 1.10E-06 |
| 48h | 4.08E-07  | 2.01E-07 | 2.51E-07 | 3.58E-07 |
| 72h | 2.72E-07  | 1.35E-07 | 3.45E-07 | 8.05E-07 |
|     | cgd7_4250 |          |          |          |
| 2h  | 2.80E-06  | 6.90E-07 | 1.80E-06 | 4.72E-06 |
| 6h  | 2.95E-06  | 8.88E-07 | 3.44E-06 | 6.47E-07 |
| 12h | 1.61E-07  | 1.39E-07 | 1.45E-06 | 5.00E-07 |
| 24h | 1.21E-06  | 8.49E-07 | 1.77E-06 | 2.09E-06 |
| 36h | 1.73E-06  | 1.49E-06 | 1.56E-06 | 1.96E-06 |
| 48h | 1.59E-06  | 2.76E-07 | 1.62E-06 | 9.42E-07 |
| 72h | 4.76E-07  | 3.70E-07 | 5.89E-07 | 7.03E-07 |
|     | cgd7_4260 |          |          |          |
| 2h  | 1.44E-02  | 1.82E-03 | 1.02E-02 | 5.46E-03 |
| 6h  | 1.17E-02  | 2.77E-03 | 3.76E-03 | 6.20E-03 |
| 12h | 1.15E-03  | 1.29E-05 | 1.95E-03 | 8.99E-04 |
| 24h | 2.00E-03  | 6.61E-04 | 3.65E-03 | 1.19E-04 |
| 36h | 1.41E-03  | 8.69E-04 | 2.04E-03 | 6.22E-04 |
| 48h | 5.16E-04  | 2.14E-04 | 7.33E-04 | 1.53E-04 |
| 72h | 2.41E-04  | 1.45E-04 | 1.66E-03 | 3.74E-04 |
|     | cgd7_4280 |          |          |          |
| 2h  | 1.02E-07  | 5.91E-07 | 2.90E-07 | 1.23E-06 |
| 6h  | 4.09E-08  | 1.58E-08 | 1.07E-07 | 2.38E-08 |
| 12h | 2.81E-04  | 3.89E-04 | 4.45E-04 | 5.40E-04 |
| 24h | 5.58E-05  | 4.34E-05 | 6.61E-05 | 1.45E-05 |
| 36h | 7.22E-05  | 7.38E-05 | 1.62E-04 | 3.28E-04 |
| 48h | 4.33E-05  | 2.75E-05 | 3.50E-05 | 2.97E-05 |
| 72h | 3.88E-06  | 7.82E-07 | 2.36E-06 | 2.44E-06 |
|     | cgd7_4290 |          |          |          |
| 2h  | 1.25E-06  | 3.89E-06 | 6.00E-07 | 1.41E-06 |
| 6h  | 6.35E-07  | 3.95E-07 | 6.57E-07 | 2.65E-07 |
| 12h | 2.59E-06  | 1.66E-06 | 3.57E-06 | 1.71E-06 |
| 24h | 1.50E-06  | 2.20E-06 | 1.87E-06 | 5.49E-07 |
| 36h | 8.49E-07  | 8.54E-07 | 1.04E-06 | 1.38E-06 |
| 48h | 3.18E-07  | 2.12E-07 | 5.07E-07 | 6.44E-07 |
| 72h | 1.60E-07  | 8.50E-08 | 1.28E-07 | 1.46E-07 |
|     | cgd7_4300 |          |          |          |
| 2h  | 1.24E-04  | 4.36E-06 | 2.50E-05 | 3.67E-05 |
| 6h  | 4.87E-06  | 0.00E+00 | 7.19E-06 | 2.16E-07 |
| 12h | 2.41E-02  | 2.21E-03 | 3.33E-02 | 4.23E-03 |
| 24h | 1.85E-03  | 7.69E-04 | 9.03E-04 | 1.00E-03 |
| 36h | 3.97E-04  | 6.76E-05 | 1.98E-03 | 1.88E-03 |
| 48h | 4.63E-04  | 2.11E-05 | 5.60E-04 | 2.21E-04 |
| 72h | 2.45E-04  | 3.98E-06 | 2.14E-04 | 8.31E-05 |
|     | cgd7_4310 |          |          |          |
| 2h  | 1.82E-04  | 4.24E-03 | 1.26E-03 | 1.22E-01 |
| 6h  | 4.23E-04  | 2.21E-04 | 9.78E-05 | 1.56E-06 |
| 12h | 1.66E-03  | 8.15E-04 | 1.39E-03 | 3.00E-04 |
| 24h | 8.35E-04  | 5.88E-04 | 3.81E-04 | 1.68E-04 |
| 36h | 2.66E-04  | 2.15E-03 | 3.52E-04 | 2.34E-04 |
| 48h | 2.04E-03  | 9.48E-03 | 5.52E-03 | 2.33E-03 |
| 72h | 7.64E-04  | 1.72E-04 | 7.95E-04 | 5.20E-04 |

|     |           |          |          |          |
|-----|-----------|----------|----------|----------|
|     | cgd7_4320 |          |          |          |
| 2h  | 3.89E-05  | 1.93E-05 | 3.98E-05 | 2.74E-05 |
| 6h  | 2.21E-05  | 6.52E-06 | 3.28E-05 | 1.03E-05 |
| 12h | 2.33E-05  | 9.25E-06 | 1.35E-04 | 2.90E-05 |
| 24h | 7.72E+01  | 2.26E-05 | 9.82E-05 | 1.97E-05 |
| 36h | 2.07E-05  | 1.16E-05 | 9.07E-05 | 2.23E-05 |
| 48h | 6.00E-06  | 2.22E-06 | 4.83E-05 | 1.22E-05 |
| 72h | 1.39E-05  | 4.97E-07 | 2.48E-05 | 2.51E-06 |
|     | cgd7_4330 |          |          |          |
| 2h  | 9.74E-07  | 8.72E-07 | 1.03E-06 | 1.13E-06 |
| 6h  | 1.67E-09  | 1.89E-07 | 9.77E-08 | 3.48E-08 |
| 12h | 2.43E-05  | 5.38E-05 | 2.83E-05 | 8.90E-06 |
| 24h | 1.32E-05  | 2.05E-05 | 7.45E-06 | 2.41E-06 |
| 36h | 4.51E-06  | 2.86E-06 | 1.34E-05 | 7.84E-06 |
| 48h | 3.31E-06  | 1.61E-06 | 5.44E-06 | 4.61E-07 |
| 72h | 7.18E-07  | 5.61E-07 | 6.06E-07 | 4.63E-07 |
|     | cgd7_4340 |          |          |          |
| 2h  | 0.00E+00  | 0.00E+00 | 0.00E+00 | 0.00E+00 |
| 6h  | 0.00E+00  | 0.00E+00 | 5.77E-09 | 0.00E+00 |
| 12h | 1.79E-06  | 1.75E-06 | 3.76E-06 | 3.32E-07 |
| 24h | 6.69E-07  | 1.39E-06 | 6.14E-07 | 1.14E-07 |
| 36h | 1.93E-06  | 9.34E-07 | 1.93E-06 | 7.52E-07 |
| 48h | 1.15E-06  | 4.05E-07 | 1.29E-06 | 1.30E-07 |
| 72h | 6.35E-08  | 7.45E-08 | 8.42E-08 | 2.86E-08 |
|     | cgd7_4350 |          |          |          |
| 2h  | 0.00E+00  | 0.00E+00 | 0.00E+00 | 9.82E-07 |
| 6h  | 0.00E+00  | 0.00E+00 | 0.00E+00 | 0.00E+00 |
| 12h | 3.69E-03  | 6.12E-03 | 6.44E-03 | 6.50E-04 |
| 24h | 9.88E-04  | 1.69E-03 | 1.34E-03 | 2.69E-04 |
| 36h | 6.63E-05  | 1.08E-03 | 1.85E-03 | 9.60E-04 |
| 48h | 2.05E-04  | 1.70E-04 | 1.42E-03 | 9.59E-05 |
| 72h | 1.35E-04  | 1.96E-04 | 1.04E-04 | 1.90E-04 |
|     | cgd7_4370 |          |          |          |
| 2h  | 1.58E-05  | 7.36E-06 | 9.43E-06 | 4.30E-06 |
| 6h  | 2.51E-05  | 2.03E-05 | 3.53E-05 | 2.87E-06 |
| 12h | 3.84E-06  | 0.00E+00 | 1.70E-05 | 1.73E-06 |
| 24h | 1.09E-05  | 3.00E-05 | 3.27E-05 | 1.22E-05 |
| 36h | 8.78E-05  | 4.82E-05 | 5.94E-05 | 6.60E-06 |
| 48h | 3.14E-05  | 8.47E-06 | 4.30E-05 | 3.21E-06 |
| 72h | 2.46E-05  | 7.84E-06 | 8.22E-06 | 4.96E-06 |
|     | cgd7_4380 |          |          |          |
| 2h  | 1.57E-04  | 1.70E-04 | 2.77E-05 | 2.69E-04 |
| 6h  | 1.20E-03  | 1.26E-03 | 1.19E-03 | 2.72E-04 |
| 12h | 1.28E-04  | 8.78E-04 | 8.88E-04 | 3.19E-05 |
| 24h | 2.92E-04  | 4.76E-04 | 1.57E-03 | 1.72E-03 |
| 36h | 9.29E-04  | 5.88E-04 | 5.48E-04 | 2.57E-04 |
| 48h | 5.48E-04  | 1.96E-04 | 3.74E-04 | 5.25E-05 |
| 72h | 9.82E-05  | 1.04E-04 | 6.46E-05 | 1.25E-04 |
|     | cgd7_4390 |          |          |          |
| 2h  | 7.49E-06  | 3.73E-06 | 1.42E-06 | 1.21E-06 |
| 6h  | 1.43E-07  | 5.83E-07 | 4.45E-05 | 7.96E-07 |
| 12h | 2.59E-07  | 7.58E-07 | 3.96E-06 | 5.64E-07 |
| 24h | 3.44E-07  | 2.08E-06 | 6.54E-06 | 1.04E-06 |

|     |           |          |          |          |
|-----|-----------|----------|----------|----------|
| 36h | 1.68E-05  | 1.53E-05 | 7.45E-06 | 2.17E-06 |
| 48h | 2.56E-05  | 8.81E-06 | 1.84E-05 | 2.28E-06 |
| 72h | 1.09E-05  | 1.23E-05 | 1.87E-05 | 3.20E-06 |
|     | cgd7_4400 |          |          |          |
| 2h  | 4.30E-05  | 1.80E-05 | 2.40E-06 | 1.59E-05 |
| 6h  | 2.75E-06  | 1.00E-05 | 0.00E+00 | 1.73E-06 |
| 12h | 3.15E-04  | 1.23E-03 | 4.74E-04 | 1.23E-04 |
| 24h | 2.56E-04  | 5.94E-04 | 1.99E-04 | 6.63E-05 |
| 36h | 6.87E-04  | 2.89E-04 | 5.66E-04 | 3.88E-04 |
| 48h | 1.66E-03  | 3.94E-04 | 5.56E-04 | 1.12E-04 |
| 72h | 6.54E-04  | 1.95E-04 | 1.70E-04 | 2.35E-04 |
|     | cgd7_4420 |          |          |          |
| 2h  | 3.79E-05  | 2.76E-05 | 1.91E-05 | 7.46E-05 |
| 6h  | 2.08E-04  | 5.34E-04 | 3.17E-04 | 6.03E-05 |
| 12h | 8.42E-05  | 2.27E-04 | 1.39E-04 | 7.68E-05 |
| 24h | 8.60E-05  | 1.70E-04 | 1.78E-04 | 4.18E-05 |
| 36h | 3.20E-04  | 1.57E-04 | 1.39E-04 | 1.38E-04 |
| 48h | 3.16E-04  | 6.87E-05 | 1.37E-04 | 3.03E-05 |
| 72h | 3.70E-05  | 2.08E-05 | 3.66E-05 | 3.74E-05 |
|     | cgd7_4440 |          |          |          |
| 2h  | 1.74E-06  | 9.83E-07 | 4.22E-07 | 1.03E-06 |
| 6h  | 3.37E-05  | 7.36E-05 | 6.68E-05 | 9.86E-06 |
| 12h | 6.96E-07  | 1.66E-06 | 2.41E-06 | 9.42E-07 |
| 24h | 1.04E-05  | 1.08E-05 | 2.49E-05 | 4.86E-06 |
| 36h | 8.54E-06  | 6.34E-06 | 3.61E-06 | 3.53E-06 |
| 48h | 1.11E-05  | 5.22E-06 | 4.84E-06 | 1.12E-06 |
| 72h | 8.15E-07  | 1.08E-06 | 4.09E-07 | 2.18E-05 |
|     | cgd7_4470 |          |          |          |
| 2h  | 7.08E-05  | 2.59E-05 | 0.00E+00 | 7.77E-06 |
| 6h  | 6.50E-06  | 0.00E+00 | 0.00E+00 | 5.78E-07 |
| 12h | 8.55E-03  | 2.07E-02 | 6.99E-03 | 1.00E-03 |
| 24h | 1.51E-03  | 7.56E-04 | 1.18E-03 | 2.27E-04 |
| 36h | 1.14E-03  | 4.52E-04 | 9.29E-04 | 5.23E-04 |
| 48h | 1.03E-04  | 5.37E-04 | 1.07E-03 | 3.21E-05 |
| 72h | 2.59E-04  | 3.56E-04 | 5.39E-04 | 1.05E-04 |
|     | cgd7_4480 |          |          |          |
| 2h  | 3.33E-04  | 1.52E-04 | 2.15E-04 | 1.35E-03 |
| 6h  | 1.31E-04  | 2.56E-04 | 1.89E-04 | 1.59E-04 |
| 12h | 6.42E-05  | 2.40E-04 | 2.90E-04 | 8.28E-05 |
| 24h | 2.16E-04  | 3.81E-04 | 2.13E-04 | 1.19E-04 |
| 36h | 1.68E-04  | 1.18E-04 | 1.07E-04 | 4.55E-05 |
| 48h | 1.97E-04  | 5.69E-05 | 1.39E-04 | 2.97E-05 |
| 72h | 4.84E-05  | 1.75E-05 | 2.64E-05 | 2.80E-05 |
|     | cgd7_4490 |          |          |          |
| 2h  | 0.00E+00  | 0.00E+00 | 0.00E+00 | 0.00E+00 |
| 6h  | 0.00E+00  | 0.00E+00 | 4.88E-08 | 0.00E+00 |
| 12h | 3.19E-06  | 1.26E-05 | 7.99E-06 | 3.29E-06 |
| 24h | 4.22E-06  | 4.27E-06 | 4.23E-06 | 1.37E-06 |
| 36h | 2.75E-05  | 2.00E-05 | 2.65E-05 | 2.46E-05 |
| 48h | 7.33E-06  | 6.92E-06 | 1.08E-05 | 7.46E-06 |
| 72h | 5.45E-06  | 4.44E-06 | 4.49E-06 | 2.90E-06 |
|     | cgd7_1800 |          |          |          |
| 2h  | 1.06E-07  | 6.37E-08 | 3.03E-08 | 2.54E-08 |

|           |          |          |          |          |
|-----------|----------|----------|----------|----------|
| 6h        | 9.76E-09 | 9.90E-08 | 0.00E+00 | 1.86E-08 |
| 12h       | 1.05E-08 | 1.70E-08 | 5.76E-08 | 2.74E-08 |
| 24h       | 6.89E-09 | 2.00E-08 | 8.10E-09 | 1.24E-08 |
| 36h       | 1.44E-07 | 5.70E-08 | 6.98E-08 | 5.38E-08 |
| 48h       | 1.87E-06 | 1.70E-06 | 6.57E-07 | 7.00E-07 |
| 72h       | 1.77E-07 | 1.98E-07 | 4.94E-07 | 1.31E-07 |
| cgd7_1810 |          |          |          |          |
| 2h        | 0.00E+00 | 0.00E+00 | 0.00E+00 | 0.00E+00 |
| 6h        | 3.68E-07 | 1.83E-07 | 2.74E-07 | 3.84E-07 |
| 12h       | 3.37E-08 | 6.74E-08 | 1.48E-08 | 2.50E-08 |
| 24h       | 5.30E-08 | 2.54E-07 | 9.87E-08 | 5.23E-07 |
| 36h       | 3.02E-07 | 5.25E-07 | 1.45E-07 | 2.94E-07 |
| 48h       | 6.74E-07 | 6.45E-07 | 2.00E-07 | 1.89E-07 |
| 72h       | 1.16E-07 | 9.96E-08 | 1.10E-07 | 9.24E-08 |
| cgd7_1820 |          |          |          |          |
| 2h        | 0.00E+00 | 0.00E+00 | 0.00E+00 | 0.00E+00 |
| 6h        | 1.91E-05 | 1.02E-05 | 6.93E-06 | 1.10E-05 |
| 12h       | 2.67E-07 | 4.64E-07 | 1.17E-07 | 1.28E-09 |
| 24h       | 1.53E-06 | 7.56E-06 | 5.90E-06 | 1.73E-05 |
| 36h       | 3.11E-05 | 1.50E-05 | 4.64E-06 | 6.21E-06 |
| 48h       | 4.71E-05 | 1.62E-05 | 7.06E-06 | 1.05E-05 |
| 72h       | 4.03E-05 | 7.55E-06 | 3.21E-06 | 4.28E-06 |
| cgd7_1830 |          |          |          |          |
| 2h        | 0.00E+00 | 0.00E+00 | 0.00E+00 | 0.00E+00 |
| 6h        | 2.56E-07 | 3.99E-07 | 1.11E-06 | 4.41E-07 |
| 12h       | 1.05E-06 | 1.88E-06 | 6.42E-07 | 6.22E-07 |
| 24h       | 9.69E-07 | 1.13E-06 | 1.72E-06 | 4.54E-06 |
| 36h       | 4.69E-06 | 3.63E-06 | 4.08E-06 | 2.77E-06 |
| 48h       | 3.28E-06 | 2.70E-06 | 2.13E-06 | 2.86E-06 |
| 72h       | 4.87E-07 | 6.70E-07 | 1.44E-06 | 7.03E-07 |
| cgd7_1840 |          |          |          |          |
| 2h        | 1.69E-06 | 4.48E-07 | 7.41E-08 | 7.68E-07 |
| 6h        | 3.10E-07 | 1.45E-07 | 1.12E-07 | 1.20E-07 |
| 12h       | 4.90E-06 | 8.16E-06 | 1.79E-06 | 3.31E-06 |
| 24h       | 1.33E-06 | 1.55E-06 | 6.44E-07 | 6.77E-07 |
| 36h       | 1.99E-06 | 2.17E-06 | 2.00E-06 | 2.73E-06 |
| 48h       | 1.60E-06 | 1.00E-06 | 2.28E-06 | 1.43E-06 |
| 72h       | 1.30E-06 | 1.19E-06 | 1.51E-06 | 1.32E-06 |
| cgd7_1850 |          |          |          |          |
| 2h        | 0.00E+00 | 0.00E+00 | 0.00E+00 | 0.00E+00 |
| 6h        | 3.67E-07 | 3.99E-06 | 3.42E-06 | 4.00E-06 |
| 12h       | 4.33E-05 | 2.62E-05 | 1.96E-05 | 1.98E-05 |
| 24h       | 7.40E-05 | 5.86E-05 | 5.04E-05 | 7.29E-05 |
| 36h       | 4.51E-04 | 2.07E-04 | 7.13E-05 | 1.05E-04 |
| 48h       | 2.41E-04 | 7.71E-05 | 5.06E-05 | 3.98E-05 |
| 72h       | 1.02E-04 | 2.02E-05 | 2.80E-05 | 2.07E-05 |
| cgd7_1860 |          |          |          |          |
| 2h        | 0.00E+00 | 0.00E+00 | 0.00E+00 | 0.00E+00 |
| 6h        | 8.80E-09 | 1.29E-07 | 7.27E-08 | 1.16E-07 |
| 12h       | 6.38E-09 | 0.00E+00 | 2.48E-09 | 9.76E-09 |
| 24h       | 6.62E-08 | 1.10E-07 | 1.04E-07 | 1.35E-07 |
| 36h       | 3.11E-07 | 1.43E-07 | 1.45E-07 | 2.18E-07 |
| 48h       | 3.50E-07 | 2.37E-07 | 2.38E-07 | 9.94E-08 |

|     |           |          |          |          |
|-----|-----------|----------|----------|----------|
| 72h | 1.06E-07  | 1.11E-07 | 3.54E-07 | 6.73E-08 |
|     | cgd7_1880 |          |          |          |
| 2h  | 6.60E-07  | 1.04E-06 | 1.03E-06 | 8.96E-07 |
| 6h  | 9.59E-06  | 5.78E-06 | 3.15E-06 | 6.13E-06 |
| 12h | 5.62E-07  | 1.22E-06 | 1.12E-06 | 1.97E-06 |
| 24h | 2.03E-06  | 2.05E-06 | 1.78E-06 | 3.33E-06 |
| 36h | 3.15E-06  | 1.35E-06 | 1.26E-06 | 1.18E-06 |
| 48h | 1.62E-06  | 7.27E-07 | 7.11E-07 | 7.54E-07 |
| 72h | 7.75E-07  | 5.17E-07 | 1.15E-06 | 5.80E-07 |
|     | cgd7_1890 |          |          |          |
| 2h  | 5.35E-07  | 4.53E-07 | 1.48E-07 | 3.47E-07 |
| 6h  | 2.01E-05  | 3.17E-05 | 7.06E-05 | 6.15E-05 |
| 12h | 3.40E-06  | 7.86E-06 | 2.66E-06 | 6.64E-06 |
| 24h | 4.49E-06  | 8.34E-06 | 3.32E-05 | 4.08E-05 |
| 36h | 1.98E-05  | 2.36E-05 | 8.34E-06 | 9.51E-06 |
| 48h | 1.11E-05  | 8.62E-06 | 7.03E-06 | 8.26E-06 |
| 72h | 1.89E-06  | 1.69E-06 | 1.05E-06 | 1.00E-06 |
|     | cgd7_1900 |          |          |          |
| 2h  | 4.45E-06  | 4.32E-06 | 1.08E-06 | 7.36E-06 |
| 6h  | 9.64E-06  | 1.94E-05 | 1.46E-05 | 1.45E-05 |
| 12h | 8.81E-07  | 1.89E-06 | 1.50E-06 | 2.84E-06 |
| 24h | 3.83E-06  | 4.96E-06 | 6.51E-06 | 9.69E-06 |
| 36h | 9.13E-06  | 7.69E-06 | 2.57E-06 | 2.55E-06 |
| 48h | 3.38E-06  | 3.07E-06 | 3.53E-06 | 3.56E-06 |
| 72h | 1.82E-06  | 8.77E-07 | 1.40E-06 | 5.87E-07 |
|     | cgd7_1920 |          |          |          |
| 2h  | 0.00E+00  | 0.00E+00 | 0.00E+00 | 2.63E-04 |
| 6h  | 0.00E+00  | 1.91E-05 | 0.00E+00 | 0.00E+00 |
| 12h | 2.76E-05  | 3.16E-05 | 7.22E-05 | 2.16E-05 |
| 24h | 1.38E-04  | 7.35E-05 | 2.35E-05 | 5.00E-04 |
| 36h | 1.98E-04  | 7.98E-05 | 2.17E-05 | 4.83E-04 |
| 48h | 6.19E-05  | 1.05E-04 | 2.24E-05 | 5.13E-04 |
| 72h | 2.44E-04  | 8.00E-05 | 1.20E-04 | 5.61E-04 |
|     | cgd7_1930 |          |          |          |
| 2h  | 0.00E+00  | 0.00E+00 | 0.00E+00 | 0.00E+00 |
| 6h  | 3.25E-03  | 2.34E-03 | 3.56E-03 | 8.00E-03 |
| 12h | 8.30E-04  | 2.27E-03 | 1.60E-03 | 1.23E-03 |
| 24h | 5.30E-04  | 1.24E-03 | 1.86E-03 | 8.76E-03 |
| 36h | 9.24E-04  | 1.37E-03 | 8.29E-04 | 4.74E-03 |
| 48h | 3.08E-04  | 9.18E-04 | 6.06E-04 | 3.21E-03 |
| 72h | 6.99E-04  | 1.34E-03 | 6.33E-04 | 2.78E-03 |
|     | cgd7_4500 |          |          |          |
| 2h  | 0.00E+00  | 0.00E+00 | 1.89E-09 | 0.00E+00 |
| 6h  | 0.00E+00  | 2.49E-08 | 3.77E-09 | 0.00E+00 |
| 12h | 3.87E-06  | 1.28E-05 | 1.69E-05 | 9.34E-06 |
| 24h | 2.20E-06  | 7.10E-06 | 2.67E-06 | 5.89E-06 |
| 36h | 6.60E-06  | 5.46E-06 | 8.75E-06 | 1.17E-05 |
| 48h | 3.98E-06  | 2.83E-06 | 4.80E-06 | 5.49E-06 |
| 72h | 3.52E-07  | 4.43E-07 | 1.82E-07 | 1.44E-07 |
|     | cgd7_4520 |          |          |          |
| 2h  | 1.51E-05  | 4.62E-06 | 2.77E-06 | 4.39E-06 |
| 6h  | 1.79E-06  | 6.77E-06 | 2.65E-06 | 4.07E-06 |
| 12h | 1.28E-06  | 1.67E-06 | 5.60E-06 | 4.84E-06 |

|           |          |          |          |          |
|-----------|----------|----------|----------|----------|
| 24h       | 5.90E-06 | 7.33E-06 | 5.84E-06 | 6.63E-06 |
| 36h       | 2.48E-06 | 2.72E-06 | 9.04E-07 | 1.72E-06 |
| 48h       | 3.56E-06 | 3.85E-06 | 2.47E-06 | 1.88E-06 |
| 72h       | 1.08E-06 | 6.97E-07 | 4.49E-07 | 1.44E-06 |
| cgd7_4530 |          |          |          |          |
| 2h        | 0.00E+00 | 2.29E-07 | 3.89E-07 | 0.00E+00 |
| 6h        | 0.00E+00 | 9.21E-07 | 3.68E-07 | 1.31E-07 |
| 12h       | 1.28E-04 | 5.22E-05 | 2.31E-05 | 2.49E-05 |
| 24h       | 3.44E-05 | 4.48E-05 | 1.06E-05 | 7.45E-06 |
| 36h       | 4.73E-05 | 3.99E-05 | 2.92E-05 | 3.03E-05 |
| 48h       | 2.39E-04 | 6.54E-05 | 9.62E-05 | 7.17E-05 |
| 72h       | 1.29E-04 | 4.23E-05 | 2.69E-05 | 3.03E-05 |
| cgd7_4540 |          |          |          |          |
| 2h        | 0.00E+00 | 5.66E-09 | 4.19E-09 | 8.38E-09 |
| 6h        | 6.98E-09 | 1.49E-07 | 1.46E-08 | 4.39E-08 |
| 12h       | 8.34E-06 | 2.25E-05 | 1.41E-05 | 8.56E-06 |
| 24h       | 1.73E-06 | 3.04E-06 | 1.04E-06 | 1.09E-06 |
| 36h       | 5.63E-06 | 9.55E-06 | 1.44E-05 | 1.03E-05 |
| 48h       | 2.69E-06 | 5.17E-07 | 1.51E-06 | 2.63E-06 |
| 72h       | 1.48E-07 | 1.82E-07 | 5.75E-08 | 1.15E-07 |
| cgd7_4560 |          |          |          |          |
| 2h        | 2.09E-07 | 3.74E-08 | 2.15E-08 | 0.00E+00 |
| 6h        | 0.00E+00 | 1.50E-08 | 3.40E-09 | 0.00E+00 |
| 12h       | 4.20E-10 | 0.00E+00 | 3.22E-09 | 1.76E-08 |
| 24h       | 7.32E-09 | 1.11E-08 | 7.39E-09 | 1.19E-08 |
| 36h       | 3.46E-08 | 1.72E-07 | 9.26E-09 | 2.90E-08 |
| 48h       | 5.65E-07 | 1.72E-07 | 3.05E-07 | 1.15E-07 |
| 72h       | 3.46E-07 | 5.84E-07 | 6.00E-07 | 6.00E-07 |
| cgd7_4570 |          |          |          |          |
| 2h        | 1.41E-06 | 2.53E-07 | 1.08E-07 | 7.52E-08 |
| 6h        | 0.00E+00 | 5.99E-08 | 2.89E-08 | 7.67E-08 |
| 12h       | 1.71E-09 | 3.94E-08 | 4.20E-08 | 5.83E-08 |
| 24h       | 4.29E-08 | 4.19E-08 | 1.03E-07 | 6.13E-08 |
| 36h       | 8.82E-08 | 5.21E-08 | 1.91E-08 | 6.76E-08 |
| 48h       | 5.53E-07 | 2.32E-07 | 1.50E-07 | 4.29E-08 |
| 72h       | 5.38E-07 | 1.43E-07 | 1.38E-07 | 2.27E-07 |
| cgd7_4580 |          |          |          |          |
| 2h        | 9.69E-04 | 6.07E-05 | 3.10E-05 | 2.93E-05 |
| 6h        | 1.52E-04 | 3.43E-04 | 6.32E-05 | 9.18E-05 |
| 12h       | 1.02E-05 | 3.60E-05 | 3.80E-05 | 1.93E-05 |
| 24h       | 7.15E-05 | 7.87E-05 | 8.12E-05 | 6.78E-05 |
| 36h       | 1.08E-04 | 5.13E-05 | 1.53E-05 | 1.97E-05 |
| 48h       | 7.32E-05 | 4.46E-05 | 4.54E-05 | 1.99E-05 |
| 72h       | 5.27E-05 | 1.06E-05 | 9.41E-06 | 5.18E-06 |
| cgd7_4590 |          |          |          |          |
| 2h        | 1.40E-06 | 9.07E-07 | 7.72E-07 | 1.71E-06 |
| 6h        | 4.14E-07 | 1.61E-06 | 7.03E-07 | 1.05E-06 |
| 12h       | 1.57E-06 | 3.07E-06 | 3.85E-06 | 6.03E-06 |
| 24h       | 1.11E-06 | 3.19E-06 | 1.54E-06 | 1.03E-06 |
| 36h       | 7.94E-07 | 8.55E-07 | 3.82E-07 | 1.87E-06 |
| 48h       | 1.24E-06 | 5.78E-07 | 8.20E-07 | 6.80E-07 |
| 72h       | 5.52E-07 | 1.74E-07 | 1.50E-07 | 5.71E-07 |
| cgd7_4600 |          |          |          |          |

|     |           |          |          |          |
|-----|-----------|----------|----------|----------|
| 2h  | 1.39E-06  | 1.43E-07 | 5.75E-08 | 1.13E-08 |
| 6h  | 3.12E-07  | 1.42E-06 | 3.72E-07 | 9.93E-07 |
| 12h | 3.98E-08  | 1.06E-07 | 1.15E-07 | 1.76E-08 |
| 24h | 9.81E-08  | 8.81E-08 | 4.57E-07 | 7.16E-07 |
| 36h | 2.57E-07  | 3.34E-07 | 8.96E-08 | 2.20E-07 |
| 48h | 2.66E-07  | 7.84E-08 | 1.00E-07 | 1.86E-07 |
| 72h | 1.31E-07  | 1.40E-07 | 6.39E-08 | 6.86E-08 |
|     | cgd7_4610 |          |          |          |
| 2h  | 3.93E-07  | 4.38E-08 | 0.00E+00 | 0.00E+00 |
| 6h  | 1.12E-07  | 9.38E-08 | 2.15E-09 | 0.00E+00 |
| 12h | 2.92E-07  | 2.66E-07 | 8.94E-08 | 6.20E-08 |
| 24h | 2.74E-07  | 4.22E-07 | 3.20E-07 | 1.40E-07 |
| 36h | 4.72E-07  | 7.08E-07 | 2.69E-07 | 8.59E-08 |
| 48h | 2.27E-06  | 9.52E-07 | 6.31E-07 | 7.18E-07 |
| 72h | 5.23E-06  | 1.16E-06 | 1.14E-06 | 6.02E-07 |
|     | cgd7_4620 |          |          |          |
| 2h  | 2.18E-04  | 1.00E-05 | 1.20E-05 | 0.00E+00 |
| 6h  | 1.28E-04  | 2.38E-04 | 5.44E-05 | 4.40E-04 |
| 12h | 6.73E-05  | 2.64E-05 | 4.01E-05 | 2.42E-05 |
| 24h | 3.47E-05  | 7.34E-05 | 1.58E-04 | 3.27E-04 |
| 36h | 1.35E-04  | 9.01E-05 | 6.81E-05 | 1.16E-04 |
| 48h | 2.83E-04  | 2.37E-04 | 2.25E-04 | 2.19E-04 |
| 72h | 3.34E-04  | 5.55E-05 | 8.18E-05 | 9.87E-05 |
|     | cgd7_4630 |          |          |          |
| 2h  | 8.17E-05  | 3.62E-06 | 1.28E-06 | 4.15E-06 |
| 6h  | 2.68E-06  | 1.08E-05 | 5.67E-06 | 8.89E-06 |
| 12h | 5.79E-06  | 6.38E-06 | 1.13E-05 | 3.04E-06 |
| 24h | 1.80E-06  | 5.47E-06 | 2.75E-05 | 7.33E-06 |
| 36h | 1.60E-05  | 4.86E-06 | 3.13E-06 | 2.75E-06 |
| 48h | 5.80E-06  | 1.34E-06 | 2.85E-06 | 1.92E-06 |
| 72h | 6.03E-06  | 1.65E-06 | 2.96E-06 | 1.26E-06 |
|     | cgd7_4640 |          |          |          |
| 2h  | 2.96E-05  | 1.08E-05 | 3.85E-06 | 3.68E-05 |
| 6h  | 1.70E-07  | 3.37E-07 | 0.00E+00 | 2.37E-05 |
| 12h | 3.00E-05  | 2.47E-04 | 1.68E-04 | 4.12E-03 |
| 24h | 3.24E-05  | 1.37E-05 | 3.77E-04 | 1.61E-03 |
| 36h | 1.06E-05  | 2.34E-05 | 8.74E-05 | 4.22E-04 |
| 48h | 1.14E-05  | 1.22E-05 | 3.11E-05 | 4.15E-05 |
| 72h | 4.68E-06  | 7.43E-06 | 6.67E-05 | 2.83E-04 |
|     | cgd7_4650 |          |          |          |
| 2h  | 6.59E-03  | 4.11E-04 | 5.68E-04 | 0.00E+00 |
| 6h  | 2.15E-04  | 5.92E-04 | 1.61E-04 | 2.79E-05 |
| 12h | 6.69E-06  | 1.26E-04 | 0.00E+00 | 1.60E-02 |
| 24h | 6.10E-04  | 8.06E-04 | 7.72E-04 | 5.70E-03 |
| 36h | 2.31E-04  | 2.08E-04 | 1.06E-04 | 2.27E-04 |
| 48h | 2.88E-04  | 8.81E-05 | 3.84E-04 | 4.26E-05 |
| 72h | 8.21E-05  | 2.38E-05 | 1.27E-04 | 0.00E+00 |
|     | cgd7_4660 |          |          |          |
| 2h  | 1.76E-02  | 1.33E-02 | 7.94E-03 | 0.00E+00 |
| 6h  | 5.30E-03  | 4.88E-02 | 0.00E+00 | 4.87E-02 |
| 12h | 2.06E-03  | 7.91E-05 | 0.00E+00 | 5.67E-02 |
| 24h | 1.83E-03  | 2.79E-02 | 6.09E-03 | 7.70E-02 |
| 36h | 1.29E-03  | 3.88E-03 | 1.90E-03 | 4.13E-02 |



|     |           |          |          |          |
|-----|-----------|----------|----------|----------|
| 48h | 1.27E-03  | 1.24E-03 | 0.00E+00 | 2.03E-03 |
| 72h | 3.02E-04  | 2.14E-03 | 0.00E+00 | 1.27E-03 |
|     | cgd7_4670 |          |          |          |
| 2h  | 2.44E-05  | 2.78E-05 | 1.32E-06 | 0.00E+00 |
| 6h  | 2.17E-05  | 2.87E-05 | 5.85E-07 | 1.51E-03 |
| 12h | 2.47E-06  | 7.33E-06 | 4.74E-07 | 0.00E+00 |
| 24h | 6.15E-06  | 1.76E-05 | 6.53E-06 | 2.14E-05 |
| 36h | 5.70E-06  | 1.18E-05 | 7.21E-04 | 4.06E-05 |
| 48h | 1.07E-05  | 4.46E-06 | 2.07E-06 | 4.67E-07 |
| 72h | 1.06E-06  | 1.56E-06 | 2.06E-06 | 9.26E-06 |
|     | cgd7_4680 |          |          |          |
| 2h  | 0.00E+00  | 0.00E+00 | 0.00E+00 | 0.00E+00 |
| 6h  | 6.11E-07  | 3.57E-06 | 4.58E-09 | 6.88E-06 |
| 12h | 3.58E-05  | 7.58E-05 | 1.23E-04 | 1.56E-03 |
| 24h | 2.93E-05  | 2.40E-05 | 5.95E-05 | 2.69E-04 |
| 36h | 3.39E-05  | 1.49E-04 | 0.00E+00 | 4.42E-04 |
| 48h | 2.79E-05  | 1.18E-05 | 4.25E-03 | 6.93E-03 |
| 72h | 4.23E-06  | 2.11E-05 | 1.49E-06 | 3.54E-05 |
|     | cgd7_4690 |          |          |          |
| 2h  | 0.00E+00  | 2.65E-06 | 0.00E+00 | 0.00E+00 |
| 6h  | 7.61E-05  | 1.67E-04 | 4.24E-04 | 7.15E-03 |
| 12h | 7.84E-05  | 1.06E-04 | 7.44E-05 | 5.35E-03 |
| 24h | 2.08E-04  | 3.90E-04 | 1.13E-03 | 2.27E-02 |
| 36h | 5.77E-04  | 3.95E-04 | 5.55E-03 | 6.18E-03 |
| 48h | 8.55E-04  | 4.85E-04 | 7.72E-04 | 1.00E-02 |
| 72h | 2.79E-04  | 1.14E-04 | 1.18E-03 | 4.46E-02 |
|     | cgd7_4700 |          |          |          |
| 2h  | 5.59E-07  | 0.00E+00 | 0.00E+00 | 0.00E+00 |
| 6h  | 0.00E+00  | 0.00E+00 | 0.00E+00 | 0.00E+00 |
| 12h | 0.00E+00  | 5.10E-07 | 0.00E+00 | 0.00E+00 |
| 24h | 5.97E-07  | 3.33E-06 | 2.66E-04 | 0.00E+00 |
| 36h | 6.05E-06  | 7.19E-06 | 7.01E-05 | 0.00E+00 |
| 48h | 7.75E-06  | 1.86E-05 | 0.00E+00 | 1.81E-05 |
| 72h | 8.71E-05  | 1.89E-05 | 2.08E-04 | 6.30E-04 |
|     | cgd7_4710 |          |          |          |
| 2h  | 0.00E+00  | 6.48E-08 | 0.00E+00 | 0.00E+00 |
| 6h  | 0.00E+00  | 1.91E-07 | 0.00E+00 | 0.00E+00 |
| 12h | 2.80E-07  | 9.92E-08 | 0.00E+00 | 0.00E+00 |
| 24h | 6.19E-08  | 7.76E-08 | 8.70E-09 | 4.79E-05 |
| 36h | 3.12E-06  | 7.32E-07 | 1.36E-06 | 4.56E-06 |
| 48h | 1.99E-05  | 1.03E-05 | 1.06E-04 | 5.38E-05 |
| 72h | 2.61E-05  | 3.75E-06 | 3.37E-06 | 2.05E-04 |
|     | cgd7_4720 |          |          |          |
| 2h  | 0.00E+00  | 3.96E-04 | 0.00E+00 | 0.00E+00 |
| 6h  | 1.58E-10  | 1.09E-03 | 3.44E-10 | 0.00E+00 |
| 12h | 1.64E-05  | 4.05E-04 | 1.71E-03 | 8.17E-04 |
| 24h | 3.15E-06  | 7.16E-04 | 0.00E+00 | 1.28E-04 |
| 36h | 2.27E-06  | 1.55E-04 | 0.00E+00 | 6.82E-05 |
| 48h | 1.28E-06  | 1.02E-04 | 2.75E-06 | 1.82E-06 |
| 72h | 5.20E-07  | 8.66E-05 | 5.23E-07 | 5.69E-06 |
|     | cgd7_4730 |          |          |          |
| 2h  | 2.07E-04  | 0.00E+00 | 2.73E-03 | 7.87E-03 |
| 6h  | 5.63E-04  | 1.28E-03 | 6.29E-01 | 3.82E-02 |

|     |           |          |          |          |
|-----|-----------|----------|----------|----------|
| 12h | 5.51E-05  | 5.62E-05 | 5.45E-03 | 4.52E-03 |
| 24h | 1.17E-04  | 5.27E-04 | 7.96E-02 | 1.31E-02 |
| 36h | 2.05E-04  | 5.27E-04 | 3.93E-03 | 1.09E-02 |
| 48h | 2.16E-04  | 3.72E-04 | 5.39E-03 | 8.56E-03 |
| 72h | 2.97E-04  | 6.30E-04 | 6.82E-03 | 1.32E-02 |
|     | cgd7_4740 |          |          |          |
| 2h  | 1.28E-07  | 0.00E+00 | 0.00E+00 | 0.00E+00 |
| 6h  | 8.48E-07  | 4.48E-06 | 7.37E-07 | 9.67E-05 |
| 12h | 6.04E-08  | 2.49E-07 | 1.59E-04 | 8.10E-06 |
| 24h | 1.86E-07  | 1.77E-06 | 5.85E-05 | 1.11E-05 |
| 36h | 1.07E-06  | 1.03E-06 | 1.53E-04 | 3.03E-04 |
| 48h | 1.34E-06  | 8.95E-07 | 5.00E-08 | 1.76E-06 |
| 72h | 8.50E-07  | 4.01E-07 | 1.10E-06 | 2.61E-05 |
|     | cgd7_4750 |          |          |          |
| 2h  | 4.46E-04  | 1.50E-04 | 4.17E-04 | 5.84E-03 |
| 6h  | 3.18E-04  | 3.87E-04 | 6.13E-05 | 6.77E-02 |
| 12h | 7.17E-05  | 9.01E-05 | 1.02E-03 | 2.87E-01 |
| 24h | 1.00E-04  | 3.34E-04 | 1.55E-03 | 7.51E-02 |
| 36h | 2.05E-04  | 2.67E-04 | 7.35E-04 | 2.59E-02 |
| 48h | 1.91E-04  | 1.86E-04 | 3.34E-03 | 4.05E-03 |
| 72h | 1.42E-04  | 1.29E-04 | 9.52E-04 | 1.70E-01 |
|     | cgd7_4760 |          |          |          |
| 2h  | 6.24E-07  | 0.00E+00 | 3.32E-07 | 1.06E-06 |
| 6h  | 2.64E-07  | 9.06E-07 | 3.76E-07 | 3.31E-07 |
| 12h | 4.30E-08  | 7.17E-08 | 5.44E-07 | 5.61E-06 |
| 24h | 1.74E-07  | 3.76E-07 | 4.91E-07 | 4.90E-07 |
| 36h | 2.41E-07  | 2.12E-07 | 4.57E-07 | 1.85E-07 |
| 48h | 1.54E-07  | 1.47E-07 | 1.79E-07 | 2.59E-07 |
| 72h | 1.26E-07  | 2.02E-08 | 4.66E-07 | 1.89E-07 |
|     | cgd7_4790 |          |          |          |
| 2h  | 1.49E-05  | 2.05E-04 | 8.47E-05 | 4.64E-05 |
| 6h  | 5.48E-07  | 1.20E-06 | 2.61E-05 | 6.15E-06 |
| 12h | 3.76E-06  | 1.76E-04 | 1.69E-04 | 1.79E-05 |
| 24h | 3.46E-06  | 1.05E-04 | 2.43E-05 | 4.23E-06 |
| 36h | 2.51E-06  | 1.57E-05 | 3.70E-05 | 5.34E-06 |
| 48h | 1.29E-05  | 2.82E-05 | 9.51E-05 | 2.61E-05 |
| 72h | 1.35E-05  | 3.66E-05 | 2.32E-04 | 2.70E-05 |
|     | cgd7_4810 |          |          |          |
| 2h  | 6.91E-09  | 2.83E-08 | 0.00E+00 | 6.47E-08 |
| 6h  | 0.00E+00  | 3.45E-09 | 0.00E+00 | 5.61E-09 |
| 12h | 0.00E+00  | 0.00E+00 | 0.00E+00 | 1.47E-09 |
| 24h | 3.55E-09  | 1.71E-08 | 2.83E-08 | 3.73E-08 |
| 36h | 4.86E-08  | 1.12E-07 | 1.67E-07 | 3.61E-07 |
| 48h | 2.74E-05  | 2.16E-05 | 1.27E-04 | 3.93E-05 |
| 72h | 1.51E-05  | 2.77E-05 | 7.09E-05 | 3.56E-05 |
|     | cgd7_4820 |          |          |          |
| 2h  | 0.00E+00  | 0.00E+00 | 0.00E+00 | 2.93E-09 |
| 6h  | 0.00E+00  | 0.00E+00 | 0.00E+00 | 0.00E+00 |
| 12h | 5.76E-10  | 4.23E-08 | 5.03E-08 | 2.91E-08 |
| 24h | 9.37E-10  | 5.67E-08 | 4.94E-08 | 1.65E-08 |
| 36h | 3.69E-08  | 2.30E-08 | 6.41E-08 | 6.00E-08 |
| 48h | 1.31E-08  | 9.16E-09 | 1.90E-08 | 2.39E-08 |
| 72h | 4.84E-08  | 3.77E-08 | 1.10E-07 | 2.73E-08 |

|     |           |          |          |          |
|-----|-----------|----------|----------|----------|
|     | cgd7_4830 |          |          |          |
| 2h  | 0.00E+00  | 0.00E+00 | 0.00E+00 | 0.00E+00 |
| 6h  | 0.00E+00  | 0.00E+00 | 0.00E+00 | 0.00E+00 |
| 12h | 6.14E-07  | 6.45E-07 | 2.40E-06 | 7.54E-07 |
| 24h | 7.61E-08  | 1.00E-06 | 4.01E-07 | 4.80E-07 |
| 36h | 1.41E-06  | 6.09E-07 | 2.00E-06 | 1.84E-06 |
| 48h | 1.93E-07  | 2.22E-07 | 6.63E-07 | 3.58E-07 |
| 72h | 4.97E-07  | 2.56E-07 | 3.40E-07 | 2.65E-07 |
|     | cgd7_4840 |          |          |          |
| 2h  | 1.20E-08  | 2.84E-08 | 6.63E-09 | 8.34E-09 |
| 6h  | 1.44E-09  | 1.79E-08 | 4.96E-08 | 5.65E-09 |
| 12h | 8.63E-07  | 1.48E-06 | 1.40E-06 | 7.53E-07 |
| 24h | 1.57E-07  | 4.65E-07 | 2.19E-07 | 2.24E-07 |
| 36h | 1.24E-06  | 8.05E-07 | 8.11E-07 | 2.31E-06 |
| 48h | 4.35E-07  | 1.40E-07 | 6.08E-07 | 3.47E-07 |
| 72h | 2.77E-07  | 2.62E-07 | 4.11E-07 | 2.56E-07 |
|     | cgd7_4860 |          |          |          |
| 2h  | 3.05E-06  | 1.90E-06 | 9.24E-07 | 4.00E-06 |
| 6h  | 3.58E-07  | 9.70E-07 | 1.80E-06 | 9.19E-07 |
| 12h | 8.55E-07  | 1.77E-06 | 4.35E-06 | 2.47E-06 |
| 24h | 1.61E-06  | 2.60E-06 | 2.68E-06 | 1.96E-06 |
| 36h | 5.42E-07  | 1.23E-06 | 7.06E-07 | 7.31E-07 |
| 48h | 4.91E-07  | 2.95E-07 | 5.75E-07 | 8.69E-07 |
| 72h | 1.50E-07  | 2.42E-07 | 3.00E-07 | 3.03E-07 |
|     | cgd7_4880 |          |          |          |
| 2h  | 2.11E-05  | 3.93E-04 | 1.23E-03 | 4.47E-04 |
| 6h  | 8.65E-06  | 2.45E-04 | 2.57E-04 | 9.55E-05 |
| 12h | 3.77E-05  | 3.59E-04 | 5.07E-04 | 1.73E-04 |
| 24h | 3.07E-05  | 4.38E-05 | 2.40E-04 | 1.68E-04 |
| 36h | 2.77E-05  | 1.70E-04 | 2.98E-05 | 3.55E-04 |
| 48h | 1.94E-03  | 6.63E-04 | 1.74E-03 | 6.90E-03 |
| 72h | 5.47E-04  | 1.03E-03 | 1.51E-03 | 1.61E-03 |
|     | cgd7_4900 |          |          |          |
| 2h  | 5.89E-07  | 2.00E-07 | 0.00E+00 | 5.17E-07 |
| 6h  | 3.45E-07  | 1.72E-07 | 1.08E-06 | 3.50E-07 |
| 12h | 0.00E+00  | 4.24E-08 | 7.77E-09 | 8.23E-08 |
| 24h | 1.05E-07  | 1.22E-07 | 3.20E-07 | 8.87E-07 |
| 36h | 6.28E-07  | 3.82E-07 | 8.20E-08 | 3.47E-07 |
| 48h | 6.43E-07  | 1.46E-07 | 2.91E-07 | 3.38E-07 |
| 72h | 9.95E-07  | 5.32E-07 | 2.62E-06 | 5.97E-07 |
|     | cgd7_4910 |          |          |          |
| 2h  | 1.50E-07  | 9.88E-06 | 0.00E+00 | 7.51E-09 |
| 6h  | 0.00E+00  | 1.76E-09 | 0.00E+00 | 0.00E+00 |
| 12h | 2.20E-05  | 1.41E-04 | 2.83E-04 | 3.95E-05 |
| 24h | 7.35E-06  | 3.19E-05 | 4.53E-06 | 8.97E-06 |
| 36h | 1.82E-06  | 7.64E-06 | 9.34E-06 | 1.34E-05 |
| 48h | 4.15E-06  | 2.86E-06 | 3.26E-06 | 3.51E-06 |
| 72h | 1.99E-07  | 2.48E-07 | 8.00E-07 | 3.70E-07 |
|     | cgd7_4920 |          |          |          |
| 2h  | 3.08E-08  | 1.25E-06 | 0.00E+00 | 1.37E-09 |
| 6h  | 2.44E-08  | 3.88E-08 | 0.00E+00 | 6.53E-07 |
| 12h | 1.16E-07  | 2.44E-06 | 2.97E-06 | 2.27E-07 |
| 24h | 6.26E-07  | 1.38E-06 | 1.43E-06 | 1.63E-06 |

|     |           |          |          |          |
|-----|-----------|----------|----------|----------|
| 36h | 9.75E-07  | 4.11E-06 | 2.41E-06 | 1.61E-06 |
| 48h | 7.76E-06  | 1.65E-05 | 7.60E-06 | 5.74E-06 |
| 72h | 7.58E-07  | 3.43E-06 | 8.16E-06 | 2.03E-06 |
|     | cgd7_4930 |          |          |          |
| 2h  | 7.89E-07  | 2.54E-04 | 7.67E-05 | 1.10E-05 |
| 6h  | 1.07E-05  | 2.07E-04 | 2.00E-03 | 2.22E-04 |
| 12h | 1.03E-05  | 1.68E-04 | 2.46E-04 | 4.54E-05 |
| 24h | 2.34E-05  | 2.96E-04 | 1.10E-03 | 1.05E-03 |
| 36h | 1.98E-04  | 1.02E-04 | 4.16E-04 | 8.21E-04 |
| 48h | 3.74E-04  | 2.11E-04 | 5.35E-04 | 3.66E-04 |
| 72h | 1.60E-04  | 1.32E-03 | 6.03E-04 | 2.52E-04 |
|     | cgd7_4940 |          |          |          |
| 2h  | 2.58E-08  | 1.65E-08 | 0.00E+00 | 4.55E-09 |
| 6h  | 1.45E-07  | 4.94E-08 | 4.59E-08 | 6.23E-08 |
| 12h | 1.07E-08  | 2.68E-09 | 1.59E-07 | 6.01E-08 |
| 24h | 1.22E-07  | 2.46E-07 | 9.92E-07 | 3.81E-07 |
| 36h | 1.93E-07  | 5.32E-07 | 6.25E-07 | 4.30E-07 |
| 48h | 2.22E-06  | 1.83E-06 | 2.96E-06 | 3.14E-06 |
| 72h | 2.49E-06  | 1.68E-06 | 1.82E-06 | 8.65E-06 |
|     | cgd7_4950 |          |          |          |
| 2h  | 2.23E-07  | 1.09E-06 | 1.59E-07 | 6.97E-07 |
| 6h  | 3.55E-06  | 1.19E-06 | 2.10E-06 | 1.44E-06 |
| 12h | 2.50E-07  | 1.24E-06 | 6.65E-07 | 3.17E-07 |
| 24h | 7.95E-07  | 1.02E-05 | 5.55E-05 | 3.63E-06 |
| 36h | 1.81E-06  | 4.28E-06 | 5.66E-06 | 3.53E-06 |
| 48h | 1.55E-05  | 3.13E-05 | 2.70E-05 | 4.08E-05 |
| 72h | 3.45E-05  | 5.50E-05 | 5.72E-05 | 5.82E-05 |
|     | cgd7_4960 |          |          |          |
| 2h  | 9.15E-06  | 4.78E-06 | 2.02E-06 | 1.72E-05 |
| 6h  | 1.99E-05  | 1.94E-05 | 8.50E-06 | 6.37E-06 |
| 12h | 8.95E-07  | 4.10E-06 | 9.34E-06 | 3.97E-06 |
| 24h | 5.03E-06  | 2.05E-05 | 1.15E-05 | 6.70E-06 |
| 36h | 2.49E-06  | 9.67E-06 | 3.87E-06 | 6.38E-06 |
| 48h | 2.31E-06  | 4.91E-06 | 5.21E-06 | 4.18E-06 |
| 72h | 1.64E-06  | 1.12E-06 | 1.94E-06 | 2.17E-06 |
|     | cgd7_4970 |          |          |          |
| 2h  | 1.12E-03  | 2.59E-04 | 2.46E-04 | 1.88E-04 |
| 6h  | 3.08E-05  | 1.93E-04 | 1.27E-04 | 3.37E-06 |
| 12h | 2.21E-03  | 6.98E-04 | 3.53E-04 | 1.11E-04 |
| 24h | 1.37E-03  | 1.55E-04 | 6.91E-04 | 1.51E-04 |
| 36h | 9.47E-04  | 5.81E-04 | 6.38E-04 | 4.59E-04 |
| 48h | 1.70E-04  | 1.61E-04 | 8.84E-04 | 7.34E-04 |
| 72h | 2.18E-03  | 4.75E-04 | 6.37E-04 | 1.63E-03 |
|     | cgd7_4980 |          |          |          |
| 2h  | 3.65E-07  | 6.73E-08 | 0.00E+00 | 5.46E-08 |
| 6h  | 2.70E-09  | 1.75E-08 | 1.70E-08 | 4.74E-08 |
| 12h | 2.10E-08  | 6.88E-08 | 2.44E-07 | 6.67E-08 |
| 24h | 3.57E-08  | 1.36E-07 | 1.10E-07 | 1.34E-07 |
| 36h | 4.03E-07  | 4.21E-07 | 3.05E-07 | 3.22E-07 |
| 48h | 2.55E-07  | 2.09E-07 | 1.11E-07 | 2.11E-07 |
| 72h | 2.23E-07  | 3.44E-08 | 1.15E-07 | 2.64E-07 |
|     | cgd7_5000 |          |          |          |
| 2h  | 2.19E-05  | 1.51E-05 | 4.74E-06 | 1.09E-05 |

|           |          |          |          |          |
|-----------|----------|----------|----------|----------|
| 6h        | 1.76E-05 | 4.57E-05 | 1.37E-05 | 1.18E-05 |
| 12h       | 3.56E-06 | 5.13E-06 | 3.40E-05 | 1.79E-05 |
| 24h       | 5.60E-06 | 9.88E-06 | 3.01E-05 | 1.19E-05 |
| 36h       | 9.08E-06 | 8.45E-06 | 1.19E-05 | 8.58E-06 |
| 48h       | 3.67E-06 | 2.28E-06 | 3.24E-06 | 4.31E-06 |
| 72h       | 1.35E-06 | 7.01E-07 | 1.04E-06 | 1.00E-06 |
| cgd7_5020 |          |          |          |          |
| 2h        | 0.00E+00 | 8.35E-08 | 0.00E+00 | 1.59E-08 |
| 6h        | 2.16E-07 | 2.83E-07 | 1.52E-06 | 1.03E-06 |
| 12h       | 1.89E-07 | 1.19E-06 | 6.76E-07 | 2.20E-07 |
| 24h       | 1.63E-07 | 5.78E-07 | 1.69E-06 | 4.72E-07 |
| 36h       | 1.33E-06 | 3.72E-06 | 1.82E-06 | 1.26E-06 |
| 48h       | 2.14E-06 | 4.09E-06 | 7.81E-06 | 4.75E-06 |
| 72h       | 7.30E-06 | 4.03E-06 | 3.60E-06 | 3.07E-06 |
| cgd7_5030 |          |          |          |          |
| 2h        | 0.00E+00 | 0.00E+00 | 0.00E+00 | 0.00E+00 |
| 6h        | 0.00E+00 | 0.00E+00 | 0.00E+00 | 0.00E+00 |
| 12h       | 4.49E-03 | 4.75E-05 | 2.58E-04 | 4.38E-04 |
| 24h       | 6.28E-04 | 3.53E-05 | 1.34E-05 | 7.25E-05 |
| 36h       | 3.37E-04 | 3.03E-05 | 4.51E-05 | 2.32E-05 |
| 48h       | 3.88E-03 | 2.93E-05 | 2.06E-04 | 1.34E-04 |
| 72h       | 2.41E-03 | 5.49E-05 | 3.06E-04 | 5.04E-04 |
| cgd7_5040 |          |          |          |          |
| 2h        | 2.73E-08 | 1.57E-09 | 1.87E-08 | 2.97E-08 |
| 6h        | 5.30E-08 | 2.78E-08 | 1.14E-07 | 4.34E-08 |
| 12h       | 1.95E-08 | 3.65E-09 | 2.36E-08 | 8.18E-09 |
| 24h       | 7.82E-08 | 6.54E-08 | 1.05E-07 | 1.70E-07 |
| 36h       | 2.24E-08 | 1.95E-07 | 1.63E-07 | 9.65E-08 |
| 48h       | 1.85E-06 | 8.13E-07 | 1.83E-06 | 1.41E-06 |
| 72h       | 1.03E-06 | 4.95E-07 | 1.43E-06 | 9.28E-07 |
| cgd7_5050 |          |          |          |          |
| 2h        | 0.00E+00 | 0.00E+00 | 0.00E+00 | 0.00E+00 |
| 6h        | 2.38E-09 | 6.60E-07 | 2.36E-06 | 0.00E+00 |
| 12h       | 0.00E+00 | 4.73E-06 | 7.15E-07 | 1.13E-06 |
| 24h       | 2.70E-07 | 1.44E-06 | 1.80E-06 | 3.47E-06 |
| 36h       | 7.64E-06 | 7.24E-05 | 9.62E-06 | 1.78E-05 |
| 48h       | 5.57E-04 | 8.52E-04 | 8.79E-04 | 6.23E-04 |
| 72h       | 8.49E-04 | 8.38E-04 | 4.21E-04 | 7.01E-04 |
| cgd7_5060 |          |          |          |          |
| 2h        | 1.06E-04 | 1.07E-05 | 1.16E-05 | 4.56E-06 |
| 6h        | 2.63E-05 | 4.59E-05 | 2.33E-05 | 1.42E-05 |
| 12h       | 3.58E-06 | 2.59E-06 | 2.37E-05 | 4.31E-06 |
| 24h       | 7.26E-06 | 1.09E-05 | 2.23E-05 | 2.27E-05 |
| 36h       | 1.31E-05 | 1.08E-05 | 5.70E-06 | 2.44E-06 |
| 48h       | 5.26E-06 | 1.80E-06 | 3.12E-06 | 2.28E-06 |
| 72h       | 3.37E-06 | 8.94E-07 | 1.31E-06 | 1.77E-06 |
| cgd7_5080 |          |          |          |          |
| 2h        | 6.31E-03 | 5.14E-04 | 3.72E-04 | 9.18E-04 |
| 6h        | 7.09E-03 | 3.90E-03 | 1.45E-03 | 5.03E-03 |
| 12h       | 2.59E-04 | 4.73E-05 | 1.48E-04 | 6.82E-04 |
| 24h       | 1.50E-03 | 5.22E-04 | 9.01E-04 | 2.11E-03 |
| 36h       | 5.30E-04 | 4.76E-04 | 3.32E-04 | 3.58E-04 |
| 48h       | 4.66E-04 | 2.57E-04 | 3.02E-04 | 3.07E-04 |

|     |           |          |          |          |
|-----|-----------|----------|----------|----------|
| 72h | 1.73E-04  | 3.37E-05 | 6.74E-05 | 3.75E-05 |
|     | cgd7_5090 |          |          |          |
| 2h  | 1.58E-04  | 2.27E-05 | 1.61E-05 | 5.59E-05 |
| 6h  | 6.95E-06  | 1.06E-05 | 7.16E-06 | 1.72E-05 |
| 12h | 2.22E-06  | 1.42E-06 | 6.00E-06 | 1.39E-05 |
| 24h | 1.03E-04  | 5.38E-05 | 1.57E-05 | 4.04E-05 |
| 36h | 1.69E-05  | 1.32E-05 | 8.77E-06 | 9.48E-06 |
| 48h | 7.20E-05  | 2.24E-05 | 1.11E-05 | 2.07E-05 |
| 72h | 1.86E-05  | 9.08E-06 | 1.48E-05 | 1.19E-05 |
|     | cgd7_5100 |          |          |          |
| 2h  | 2.50E-07  | 3.65E-07 | 4.00E-08 | 2.63E-07 |
| 6h  | 4.67E-07  | 9.41E-07 | 4.30E-07 | 2.56E-07 |
| 12h | 4.44E-08  | 8.85E-08 | 3.05E-08 | 4.11E-08 |
| 24h | 2.78E-07  | 2.97E-07 | 3.76E-07 | 1.09E-06 |
| 36h | 4.72E-07  | 6.39E-07 | 6.18E-07 | 4.69E-07 |
| 48h | 1.05E-06  | 3.59E-07 | 5.01E-07 | 4.59E-07 |
| 72h | 1.18E-07  | 2.46E-07 | 1.49E-07 | 2.73E-07 |
|     | cgd7_5110 |          |          |          |
| 2h  | 0.00E+00  | 1.23E-08 | 0.00E+00 | 1.57E-08 |
| 6h  | 1.77E-09  | 0.00E+00 | 1.16E-09 | 1.40E-09 |
| 12h | 1.10E-08  | 3.80E-09 | 1.32E-08 | 9.55E-09 |
| 24h | 5.61E-09  | 1.71E-08 | 1.85E-08 | 7.57E-09 |
| 36h | 2.98E-08  | 6.69E-08 | 3.30E-08 | 3.26E-08 |
| 48h | 2.27E-06  | 3.35E-07 | 1.02E-06 | 1.69E-06 |
| 72h | 1.17E-06  | 3.45E-06 | 1.67E-06 | 2.44E-06 |
|     | cgd7_5120 |          |          |          |
| 2h  | 1.00E-04  | 7.49E-06 | 0.00E+00 | 1.31E-05 |
| 6h  | 1.20E-03  | 2.43E-03 | 8.13E-04 | 1.49E-03 |
| 12h | 2.66E-05  | 3.64E-05 | 1.21E-06 | 5.97E-05 |
| 24h | 4.38E-04  | 4.12E-04 | 9.01E-04 | 8.29E-04 |
| 36h | 3.00E-04  | 2.08E-04 | 1.54E-04 | 1.48E-04 |
| 48h | 7.29E-04  | 6.61E-04 | 1.48E-03 | 7.68E-04 |
| 72h | 2.26E-04  | 1.46E-03 | 1.36E-03 | 1.13E-03 |
|     | cgd7_5130 |          |          |          |
| 2h  | 0.00E+00  | 2.35E-07 | 0.00E+00 | 0.00E+00 |
| 6h  | 0.00E+00  | 0.00E+00 | 0.00E+00 | 0.00E+00 |
| 12h | 3.60E-07  | 4.75E-07 | 0.00E+00 | 0.00E+00 |
| 24h | 2.55E-07  | 0.00E+00 | 4.10E-08 | 6.00E-08 |
| 36h | 8.61E-06  | 3.09E-06 | 3.03E-06 | 2.49E-06 |
| 48h | 6.26E-04  | 4.07E-04 | 4.59E-04 | 7.05E-04 |
| 72h | 1.05E-03  | 1.17E-03 | 1.51E-03 | 7.26E-04 |
|     | cgd7_5140 |          |          |          |
| 2h  | 0.00E+00  | 0.00E+00 | 0.00E+00 | 0.00E+00 |
| 6h  | 0.00E+00  | 1.47E-09 | 0.00E+00 | 0.00E+00 |
| 12h | 0.00E+00  | 0.00E+00 | 0.00E+00 | 0.00E+00 |
| 24h | 0.00E+00  | 0.00E+00 | 0.00E+00 | 2.23E-10 |
| 36h | 4.29E-09  | 1.55E-09 | 1.74E-09 | 7.12E-09 |
| 48h | 1.56E-06  | 2.27E-07 | 8.94E-07 | 6.20E-07 |
| 72h | 1.75E-07  | 1.63E-07 | 9.29E-07 | 4.23E-07 |
|     | cgd7_5150 |          |          |          |
| 2h  | 7.83E-08  | 0.00E+00 | 0.00E+00 | 1.27E-08 |
| 6h  | 9.74E-10  | 4.18E-09 | 3.00E-09 | 0.00E+00 |
| 12h | 3.58E-09  | 0.00E+00 | 0.00E+00 | 1.07E-08 |

|     |           |          |          |          |
|-----|-----------|----------|----------|----------|
| 24h | 2.25E-08  | 3.03E-08 | 2.28E-08 | 1.95E-08 |
| 36h | 7.14E-06  | 4.11E-08 | 5.96E-08 | 3.13E-08 |
| 48h | 2.37E-06  | 5.49E-07 | 1.03E-06 | 8.67E-07 |
| 72h | 1.62E-06  | 6.20E-07 | 3.73E-06 | 8.93E-07 |
|     | cgd7_5170 |          |          |          |
| 2h  | 5.83E-06  | 8.70E-07 | 4.32E-06 | 4.43E-06 |
| 6h  | 6.58E-07  | 1.82E-06 | 1.20E-06 | 9.53E-07 |
| 12h | 6.73E-07  | 2.29E-06 | 7.19E-07 | 1.52E-06 |
| 24h | 8.55E-07  | 2.39E-06 | 1.67E-06 | 3.60E-06 |
| 36h | 1.57E-06  | 1.72E-06 | 2.93E-06 | 1.06E-06 |
| 48h | 1.36E-06  | 8.67E-07 | 1.28E-06 | 1.30E-06 |
| 72h | 2.79E-07  | 4.55E-07 | 6.48E-07 | 3.63E-07 |
|     | cgd7_5180 |          |          |          |
| 2h  | 7.50E-04  | 4.29E-04 | 1.62E-04 | 5.74E-04 |
| 6h  | 4.98E-04  | 1.82E-03 | 1.53E-03 | 1.02E-03 |
| 12h | 8.15E-04  | 4.74E-04 | 7.26E-04 | 4.22E-04 |
| 24h | 1.33E-03  | 1.19E-03 | 9.48E-04 | 9.51E-04 |
| 36h | 4.12E-04  | 2.56E-04 | 3.13E-04 | 1.35E-04 |
| 48h | 5.72E-04  | 9.04E-05 | 1.52E-04 | 1.61E-04 |
| 72h | 1.32E-04  | 4.84E-05 | 8.36E-05 | 5.33E-05 |
|     | cgd7_5190 |          |          |          |
| 2h  | 3.75E-07  | 1.38E-07 | 1.51E-07 | 1.14E-06 |
| 6h  | 4.25E-08  | 1.30E-07 | 8.10E-08 | 1.14E-07 |
| 12h | 1.19E-07  | 1.18E-07 | 4.49E-08 | 1.04E-07 |
| 24h | 4.43E-08  | 1.12E-07 | 1.58E-07 | 4.37E-07 |
| 36h | 1.74E-07  | 1.38E-07 | 2.23E-07 | 1.34E-07 |
| 48h | 5.65E-07  | 2.28E-07 | 2.82E-07 | 4.58E-07 |
| 72h | 7.35E-08  | 9.66E-08 | 2.58E-07 | 1.57E-07 |
|     | cgd7_5200 |          |          |          |
| 2h  | 1.29E-04  | 1.06E-03 | 1.10E-04 | 8.21E-03 |
| 6h  | 4.30E-04  | 4.59E-04 | 4.28E-04 | 5.20E-04 |
| 12h | 7.11E-04  | 2.96E-04 | 5.92E-04 | 1.28E-03 |
| 24h | 1.58E-04  | 1.23E-03 | 1.48E-03 | 6.15E-03 |
| 36h | 3.35E-04  | 1.63E-03 | 3.80E-04 | 7.13E-04 |
| 48h | 2.41E-04  | 2.31E-04 | 1.06E-04 | 1.74E-03 |
| 72h | 1.63E-04  | 5.78E-04 | 6.81E-04 | 8.88E-04 |
|     | cgd7_5210 |          |          |          |
| 2h  | 7.90E-07  | 2.09E-06 | 6.91E-07 | 1.87E-06 |
| 6h  | 7.18E-07  | 7.16E-07 | 3.58E-07 | 7.83E-07 |
| 12h | 1.37E-06  | 1.49E-06 | 1.97E-06 | 1.78E-06 |
| 24h | 1.75E-06  | 3.16E-06 | 3.80E-06 | 1.55E-06 |
| 36h | 7.85E-07  | 9.79E-07 | 1.32E-06 | 1.14E-06 |
| 48h | 4.46E-07  | 3.19E-07 | 1.16E-06 | 5.89E-09 |
| 72h | 1.65E-07  | 1.33E-07 | 7.37E-07 | 2.04E-07 |
|     | cgd7_5220 |          |          |          |
| 2h  | 9.10E-04  | 5.90E-04 | 5.05E-05 | 6.04E-04 |
| 6h  | 1.71E-03  | 4.73E-04 | 3.80E-04 | 6.24E-04 |
| 12h | 1.09E-04  | 6.39E-04 | 1.03E-04 | 1.50E-04 |
| 24h | 3.71E-04  | 1.78E-03 | 4.06E-04 | 4.26E-04 |
| 36h | 2.77E-04  | 2.86E-04 | 1.69E-04 | 1.03E-04 |
| 48h | 3.24E-04  | 2.33E-04 | 4.14E-04 | 4.62E-06 |
| 72h | 1.28E-04  | 9.35E-05 | 2.97E-04 | 2.71E-05 |
|     | cgd7_5230 |          |          |          |

|     |           |          |          |          |
|-----|-----------|----------|----------|----------|
| 2h  | 3.82E-03  | 9.97E-04 | 1.46E-03 | 5.64E-03 |
| 6h  | 3.18E-03  | 6.33E-04 | 7.96E-04 | 1.07E-03 |
| 12h | 9.50E-04  | 2.41E-04 | 1.12E-03 | 1.49E-03 |
| 24h | 1.78E-04  | 1.77E-04 | 3.36E-05 | 5.82E-04 |
| 36h | 6.67E-04  | 1.83E-04 | 2.36E-04 | 4.06E-04 |
| 48h | 8.80E-05  | 1.31E-04 | 5.14E-04 | 7.40E-06 |
| 72h | 1.31E-04  | 1.31E-04 | 5.69E-04 | 1.29E-04 |
|     | cgd7_5240 |          |          |          |
| 2h  | 1.12E-06  | 5.17E-07 | 5.44E-07 | 8.45E-08 |
| 6h  | 3.56E-07  | 3.84E-06 | 1.68E-06 | 2.16E-06 |
| 12h | 8.00E-05  | 7.87E-05 | 4.58E-05 | 2.34E-05 |
| 24h | 1.57E-05  | 3.81E-05 | 6.09E-06 | 7.92E-06 |
| 36h | 8.53E-06  | 1.60E-05 | 3.53E-05 | 1.04E-05 |
| 48h | 1.24E-05  | 2.29E-06 | 2.13E-05 | 2.86E-07 |
| 72h | 6.66E-06  | 4.36E-06 | 1.07E-05 | 2.64E-06 |
|     | cgd7_5250 |          |          |          |
| 2h  | 4.85E-06  | 2.57E-05 | 1.14E-05 | 1.60E-05 |
| 6h  | 6.84E-06  | 6.60E-06 | 1.72E-06 | 7.66E-06 |
| 12h | 1.56E-05  | 1.41E-05 | 1.46E-05 | 7.89E-06 |
| 24h | 6.92E-06  | 2.08E-05 | 4.99E-06 | 7.29E-06 |
| 36h | 4.90E-06  | 7.71E-06 | 1.14E-05 | 3.79E-06 |
| 48h | 6.08E-06  | 2.26E-06 | 8.16E-06 | 7.90E-08 |
| 72h | 4.90E-06  | 5.95E-06 | 1.21E-05 | 2.26E-06 |
|     | cgd7_5270 |          |          |          |
| 2h  | 1.82E-06  | 1.34E-06 | 7.52E-07 | 1.92E-06 |
| 6h  | 2.69E-06  | 3.51E-06 | 3.09E-06 | 1.87E-06 |
| 12h | 3.21E-07  | 3.92E-07 | 1.15E-06 | 8.69E-07 |
| 24h | 1.07E-06  | 1.47E-06 | 2.63E-06 | 1.48E-06 |
| 36h | 6.98E-07  | 1.28E-06 | 9.97E-07 | 5.02E-07 |
| 48h | 5.78E-07  | 3.06E-07 | 1.22E-06 | 1.52E-08 |
| 72h | 2.05E-07  | 1.45E-07 | 1.21E-06 | 2.40E-07 |
|     | cgd7_5280 |          |          |          |
| 2h  | 0.00E+00  | 1.63E-06 | 0.00E+00 | 0.00E+00 |
| 6h  | 1.90E-04  | 2.01E-04 | 9.89E-05 | 1.27E-04 |
| 12h | 6.31E-06  | 4.25E-05 | 7.46E-06 | 4.45E-06 |
| 24h | 2.51E-05  | 7.24E-05 | 6.55E-05 | 5.67E-05 |
| 36h | 5.60E-05  | 5.93E-05 | 5.00E-05 | 2.31E-05 |
| 48h | 5.29E-05  | 6.30E-05 | 3.60E-05 | 3.74E-07 |
| 72h | 6.32E-06  | 1.03E-05 | 9.94E-06 | 3.90E-06 |
|     | cgd7_5300 |          |          |          |
| 2h  | 7.61E-05  | 1.89E-04 | 2.04E-07 | 1.58E-05 |
| 6h  | 3.43E-04  | 4.39E-04 | 2.21E-04 | 2.76E-04 |
| 12h | 1.97E-07  | 0.00E+00 | 1.07E-06 | 5.99E-06 |
| 24h | 5.47E-05  | 7.60E-05 | 9.39E-05 | 5.16E-05 |
| 36h | 8.57E-05  | 1.22E-04 | 7.06E-05 | 2.04E-05 |
| 48h | 1.25E-04  | 1.48E-04 | 8.11E-05 | 1.49E-06 |
| 72h | 8.09E-06  | 8.04E-05 | 2.23E-05 | 4.10E-06 |
|     | cgd7_5310 |          |          |          |
| 2h  | 1.54E-05  | 4.10E-05 | 5.44E-06 | 2.95E-05 |
| 6h  | 4.09E-06  | 5.55E-07 | 5.26E-06 | 5.27E-06 |
| 12h | 4.42E-06  | 1.59E-05 | 8.61E-06 | 9.47E-06 |
| 24h | 1.18E-05  | 1.22E-05 | 6.68E-06 | 7.24E-06 |
| 36h | 3.08E-06  | 9.46E-06 | 5.14E-06 | 1.85E-06 |



|     |           |          |          |          |
|-----|-----------|----------|----------|----------|
| 48h | 3.20E-06  | 5.84E-06 | 8.16E-06 | 1.17E-07 |
| 72h | 3.38E-06  | 2.08E-06 | 3.52E-06 | 1.68E-06 |
|     | cgd7_5330 |          |          |          |
| 2h  | 3.95E-09  | 0.00E+00 | 0.00E+00 | 2.57E-08 |
| 6h  | 0.00E+00  | 0.00E+00 | 8.46E-09 | 1.96E-09 |
| 12h | 1.00E-05  | 4.84E-05 | 3.86E-06 | 4.04E-06 |
| 24h | 6.19E-07  | 1.57E-06 | 1.21E-06 | 5.97E-07 |
| 36h | 3.65E-07  | 9.52E-07 | 1.57E-06 | 3.83E-06 |
| 48h | 2.05E-07  | 2.45E-07 | 6.58E-07 | 6.28E-09 |
| 72h | 1.53E-07  | 1.15E-07 | 1.64E-07 | 4.21E-08 |
|     | cgd7_5340 |          |          |          |
| 2h  | 0.00E+00  | 2.66E-08 | 0.00E+00 | 0.00E+00 |
| 6h  | 0.00E+00  | 2.59E-09 | 0.00E+00 | 0.00E+00 |
| 12h | 3.75E-06  | 7.85E-06 | 2.46E-06 | 9.88E-07 |
| 24h | 4.09E-07  | 8.10E-07 | 4.66E-07 | 2.24E-07 |
| 36h | 3.59E-07  | 3.57E-07 | 1.73E-06 | 7.36E-07 |
| 48h | 2.89E-07  | 3.68E-07 | 3.07E-07 | 8.21E-09 |
| 72h | 5.78E-08  | 1.18E-07 | 3.47E-07 | 4.18E-08 |
|     | cgd7_5350 |          |          |          |
| 2h  | 1.15E-06  | 3.52E-06 | 6.02E-08 | 0.00E+00 |
| 6h  | 3.22E-06  | 3.09E-06 | 8.25E-06 | 2.17E-06 |
| 12h | 7.45E-07  | 1.94E-06 | 1.08E-06 | 1.99E-06 |
| 24h | 2.43E-06  | 2.35E-06 | 1.02E-05 | 6.01E-06 |
| 36h | 9.15E-06  | 1.89E-05 | 9.60E-06 | 8.07E-06 |
| 48h | 5.50E-06  | 1.23E-05 | 1.38E-05 | 6.30E-07 |
| 72h | 2.38E-05  | 3.64E-06 | 1.25E-05 | 1.03E-05 |
|     | cgd7_5500 |          |          |          |
| 2h  | 1.30E-06  | 2.32E-07 | 3.14E-06 | 1.44E-06 |
| 6h  | 0.00E+00  | 0.00E+00 | 7.27E-07 | 1.06E-08 |
| 12h | 8.43E-08  | 3.17E-06 | 5.32E-05 | 4.19E-07 |
| 24h | 3.89E-06  | 1.35E-05 | 7.86E-06 | 1.15E-05 |
| 36h | 1.36E-05  | 9.10E-05 | 4.80E-05 | 2.83E-05 |
| 48h | 1.05E-04  | 8.43E-05 | 1.35E-04 | 5.00E-04 |
| 72h | 6.77E-06  | 5.95E-05 | 6.31E-05 | 4.79E-05 |
|     | cgd7_5510 |          |          |          |
| 2h  | 0.00E+00  | 0.00E+00 | 0.00E+00 | 1.22E-08 |
| 6h  | 0.00E+00  | 0.00E+00 | 0.00E+00 | 0.00E+00 |
| 12h | 1.06E-09  | 9.61E-09 | 2.15E-09 | 5.53E-09 |
| 24h | 5.51E-09  | 4.52E-09 | 1.89E-08 | 3.71E-09 |
| 36h | 1.94E-08  | 9.44E-08 | 3.28E-08 | 1.22E-08 |
| 48h | 2.61E-08  | 1.64E-06 | 2.22E-08 | 3.30E-08 |
| 72h | 7.28E-09  | 1.05E-06 | 9.23E-08 | 6.51E-08 |
|     | cgd7_5520 |          |          |          |
| 2h  | 3.00E-08  | 0.00E+00 | 0.00E+00 | 0.00E+00 |
| 6h  | 7.74E-08  | 7.06E-08 | 6.61E-08 | 1.67E-08 |
| 12h | 1.74E-05  | 1.33E-04 | 1.67E-04 | 2.98E-05 |
| 24h | 1.24E-05  | 1.68E-05 | 2.25E-05 | 1.39E-05 |
| 36h | 2.04E-06  | 1.14E-04 | 8.02E-05 | 6.34E-05 |
| 48h | 6.35E-07  | 7.86E-05 | 2.06E-06 | 9.99E-06 |
| 72h | 1.63E-07  | 4.21E-05 | 8.54E-07 | 7.98E-07 |
|     | cgd8_10   |          |          |          |
| 2h  | 3.68E-08  | 2.49E-09 | 2.75E-08 | 1.25E-09 |
| 6h  | 7.27E-07  | 1.10E-07 | 3.69E-07 | 7.48E-08 |

|     |          |          |          |          |
|-----|----------|----------|----------|----------|
| 12h | 6.90E-11 | 0.00E+00 | 2.42E-08 | 2.95E-09 |
| 24h | 5.81E-08 | 6.78E-09 | 1.08E-07 | 1.28E-07 |
| 36h | 3.24E-08 | 4.31E-08 | 4.18E-08 | 9.18E-08 |
| 48h | 1.41E-08 | 5.00E-08 | 4.69E-08 | 8.63E-08 |
| 72h | 2.53E-09 | 8.69E-08 | 1.04E-08 | 1.10E-08 |
|     | cgd8_20  |          |          |          |
| 2h  | 0.00E+00 | 0.00E+00 | 0.00E+00 | 0.00E+00 |
| 6h  | 0.00E+00 | 0.00E+00 | 0.00E+00 | 0.00E+00 |
| 12h | 1.08E-06 | 1.20E-06 | 1.94E-06 | 5.70E-07 |
| 24h | 7.07E-08 | 1.02E-08 | 1.83E-08 | 4.23E-08 |
| 36h | 6.04E-08 | 1.94E-08 | 2.68E-07 | 2.58E-07 |
| 48h | 2.33E-09 | 9.08E-08 | 4.95E-09 | 1.67E-08 |
| 72h | 2.07E-08 | 4.15E-08 | 4.10E-08 | 6.63E-08 |
|     | cgd8_30  |          |          |          |
| 2h  | 2.31E-07 | 1.15E-08 | 1.19E-08 | 2.93E-07 |
| 6h  | 8.87E-09 | 2.78E-09 | 0.00E+00 | 2.53E-09 |
| 12h | 1.23E-07 | 1.41E-07 | 1.05E-07 | 5.12E-08 |
| 24h | 3.54E-08 | 1.96E-08 | 6.66E-08 | 3.51E-08 |
| 36h | 3.74E-08 | 2.44E-08 | 1.85E-08 | 1.14E-07 |
| 48h | 7.00E-09 | 1.19E-08 | 1.73E-08 | 8.21E-08 |
| 72h | 1.90E-08 | 2.67E-07 | 2.50E-08 | 9.14E-08 |
|     | cgd8_40  |          |          |          |
| 2h  | 5.25E-10 | 8.29E-10 | 0.00E+00 | 0.00E+00 |
| 6h  | 2.24E-09 | 0.00E+00 | 0.00E+00 | 0.00E+00 |
| 12h | 1.77E-06 | 2.71E-06 | 2.36E-06 | 1.31E-06 |
| 24h | 1.47E-07 | 9.90E-08 | 2.93E-07 | 1.23E-07 |
| 36h | 2.15E-07 | 1.49E-07 | 1.26E-06 | 1.25E-06 |
| 48h | 9.28E-08 | 6.41E-08 | 2.26E-07 | 1.63E-07 |
| 72h | 4.66E-08 | 7.50E-08 | 1.39E-07 | 1.47E-07 |
|     | cgd8_50  |          |          |          |
| 2h  | 7.49E-07 | 0.00E+00 | 8.32E-08 | 5.66E-06 |
| 6h  | 3.01E-08 | 1.66E-08 | 0.00E+00 | 1.11E-07 |
| 12h | 3.77E-06 | 5.79E-06 | 1.02E-05 | 6.63E-06 |
| 24h | 5.27E-07 | 1.19E-06 | 2.71E-06 | 2.31E-06 |
| 36h | 2.45E-06 | 3.58E-06 | 1.63E-05 | 2.51E-05 |
| 48h | 1.31E-06 | 3.87E-06 | 3.70E-06 | 8.60E-06 |
| 72h | 3.31E-07 | 4.58E-06 | 9.47E-07 | 1.00E-05 |
|     | cgd8_60  |          |          |          |
| 2h  | 5.56E-05 | 6.65E-06 | 1.08E-04 | 4.58E-04 |
| 6h  | 4.07E-06 | 3.14E-06 | 1.03E-05 | 7.92E-06 |
| 12h | 1.08E-05 | 3.92E-05 | 7.28E-05 | 3.68E-05 |
| 24h | 2.24E-05 | 2.05E-05 | 6.98E-05 | 5.60E-05 |
| 36h | 3.39E-05 | 2.96E-05 | 5.02E-05 | 6.86E-05 |
| 48h | 1.59E-05 | 1.81E-05 | 6.28E-05 | 9.09E-05 |
| 72h | 9.66E-06 | 1.48E-05 | 1.34E-05 | 2.65E-05 |
|     | cgd8_70  |          |          |          |
| 2h  | 2.00E-06 | 2.28E-08 | 5.62E-07 | 1.99E-06 |
| 6h  | 1.19E-06 | 6.07E-07 | 6.61E-06 | 1.72E-06 |
| 12h | 1.74E-07 | 2.32E-07 | 1.53E-07 | 2.27E-07 |
| 24h | 3.16E-07 | 1.78E-07 | 4.37E-06 | 2.39E-06 |
| 36h | 8.31E-07 | 9.52E-07 | 1.61E-06 | 2.98E-06 |
| 48h | 2.32E-06 | 9.37E-07 | 2.37E-06 | 4.54E-06 |
| 72h | 3.55E-07 | 4.59E-07 | 5.31E-07 | 6.81E-07 |

|     |           |          |          |          |
|-----|-----------|----------|----------|----------|
|     | cgd8_80   |          |          |          |
| 2h  | 3.01E-06  | 4.77E-07 | 2.14E-06 | 6.13E-06 |
| 6h  | 1.01E-06  | 3.27E-07 | 2.32E-06 | 1.97E-06 |
| 12h | 6.55E-07  | 4.91E-07 | 3.61E-06 | 1.83E-06 |
| 24h | 9.33E-07  | 4.87E-07 | 4.48E-06 | 2.31E-06 |
| 36h | 1.03E-06  | 5.96E-07 | 1.40E-06 | 2.03E-06 |
| 48h | 7.01E-07  | 4.00E-07 | 2.03E-06 | 3.78E-06 |
| 72h | 1.73E-07  | 1.34E-07 | 1.87E-07 | 7.67E-07 |
|     | cgd8_90   |          |          |          |
| 2h  | 8.65E-08  | 8.13E-09 | 2.49E-08 | 2.89E-08 |
| 6h  | 4.24E-07  | 2.63E-07 | 6.00E-07 | 1.72E-07 |
| 12h | 1.38E-08  | 3.32E-09 | 4.38E-08 | 7.11E-08 |
| 24h | 7.30E-08  | 1.32E-08 | 4.90E-07 | 2.81E-07 |
| 36h | 2.70E-07  | 1.97E-07 | 3.16E-07 | 3.58E-07 |
| 48h | 3.33E-07  | 1.56E-07 | 2.83E-07 | 4.98E-07 |
| 72h | 3.39E-07  | 4.11E-07 | 2.91E-07 | 1.52E-07 |
|     | cgd7_5360 |          |          |          |
| 2h  | 5.06E-07  | 7.23E-08 | 8.10E-07 | 6.50E-07 |
| 6h  | 6.12E-07  | 5.73E-07 | 1.20E-06 | 4.63E-07 |
| 12h | 4.57E-08  | 9.54E-08 | 4.09E-07 | 9.06E-08 |
| 24h | 3.50E-07  | 3.14E-07 | 8.25E-07 | 2.74E-07 |
| 36h | 2.42E-07  | 2.76E-07 | 3.00E-07 | 6.98E-08 |
| 48h | 2.19E-07  | 8.82E-08 | 3.60E-07 | 2.53E-07 |
| 72h | 1.45E-07  | 8.49E-08 | 1.64E-07 | 6.16E-08 |
|     | cgd7_5370 |          |          |          |
| 2h  | 9.72E-07  | 1.49E-07 | 7.47E-08 | 5.68E-07 |
| 6h  | 8.20E-07  | 2.50E-06 | 1.19E-06 | 1.75E-06 |
| 12h | 1.47E-08  | 3.93E-08 | 3.60E-07 | 7.12E-08 |
| 24h | 6.23E-07  | 1.04E-06 | 2.06E-06 | 2.05E-07 |
| 36h | 3.05E-07  | 4.47E-07 | 4.56E-07 | 1.20E-07 |
| 48h | 4.81E-07  | 4.48E-07 | 6.84E-07 | 3.35E-07 |
| 72h | 3.40E-07  | 2.12E-07 | 2.34E-07 | 9.59E-08 |
|     | cgd7_5380 |          |          |          |
| 2h  | 0.00E+00  | 0.00E+00 | 0.00E+00 | 0.00E+00 |
| 6h  | 2.09E-08  | 6.42E-09 | 4.46E-08 | 1.53E-08 |
| 12h | 1.73E-09  | 0.00E+00 | 2.67E-09 | 1.30E-10 |
| 24h | 4.37E-09  | 4.83E-09 | 2.41E-08 | 1.32E-08 |
| 36h | 2.61E-08  | 8.75E-08 | 2.13E-08 | 1.38E-08 |
| 48h | 5.52E-08  | 4.86E-08 | 4.41E-08 | 2.64E-08 |
| 72h | 4.78E-08  | 4.73E-08 | 1.81E-07 | 2.77E-08 |
|     | cgd7_5390 |          |          |          |
| 2h  | 0.00E+00  | 0.00E+00 | 0.00E+00 | 0.00E+00 |
| 6h  | 0.00E+00  | 0.00E+00 | 0.00E+00 | 0.00E+00 |
| 12h | 3.06E-06  | 0.00E+00 | 5.29E-06 | 1.21E-06 |
| 24h | 3.87E-06  | 2.41E-06 | 3.63E-06 | 2.55E-06 |
| 36h | 6.00E-06  | 8.30E-06 | 8.83E-06 | 3.31E-06 |
| 48h | 8.09E-06  | 3.85E-06 | 4.52E-05 | 9.82E-06 |
| 72h | 7.39E-06  | 3.90E-06 | 6.13E-05 | 1.15E-05 |
|     | cgd7_5410 |          |          |          |
| 2h  | 1.20E-07  | 5.11E-08 | 1.25E-07 | 2.95E-07 |
| 6h  | 2.83E-07  | 4.65E-07 | 8.92E-07 | 3.92E-07 |
| 12h | 1.21E-08  | 8.55E-08 | 5.42E-07 | 5.15E-08 |
| 24h | 1.52E-07  | 1.25E-07 | 8.11E-07 | 1.63E-07 |

|     |           |          |          |          |
|-----|-----------|----------|----------|----------|
| 36h | 2.44E-07  | 3.49E-07 | 4.38E-07 | 1.68E-07 |
| 48h | 1.92E-07  | 1.43E-07 | 4.65E-07 | 2.04E-07 |
| 72h | 1.00E-07  | 1.29E-07 | 2.59E-07 | 8.15E-08 |
|     | cgd7_5420 |          |          |          |
| 2h  | 6.43E-05  | 1.25E-05 | 0.00E+00 | 3.68E-04 |
| 6h  | 1.15E-04  | 2.47E-05 | 2.31E-04 | 6.11E-05 |
| 12h | 8.91E-06  | 1.64E-05 | 3.10E-05 | 5.04E-05 |
| 24h | 2.57E-05  | 1.34E-05 | 1.20E-04 | 5.39E-05 |
| 36h | 2.42E-05  | 5.39E-05 | 6.29E-05 | 7.17E-05 |
| 48h | 1.55E-05  | 1.76E-05 | 5.25E-05 | 3.07E-05 |
| 72h | 8.16E-06  | 1.91E-05 | 1.17E-05 | 6.54E-06 |
|     | cgd7_5440 |          |          |          |
| 2h  | 8.97E-04  | 1.10E-04 | 2.72E-05 | 1.71E-04 |
| 6h  | 5.05E-04  | 3.85E-04 | 1.01E-03 | 1.43E-04 |
| 12h | 5.58E-05  | 7.22E-05 | 4.53E-04 | 3.30E-05 |
| 24h | 1.13E-04  | 1.54E-04 | 4.54E-04 | 1.61E-04 |
| 36h | 1.94E-04  | 3.09E-04 | 1.59E-04 | 8.44E-05 |
| 48h | 4.90E-04  | 1.50E-04 | 9.58E-05 | 4.65E-05 |
| 72h | 3.98E-05  | 4.00E-05 | 1.77E-05 | 1.40E-05 |
|     | cgd7_5450 |          |          |          |
| 2h  | 0.00E+00  | 0.00E+00 | 0.00E+00 | 0.00E+00 |
| 6h  | 0.00E+00  | 0.00E+00 | 0.00E+00 | 0.00E+00 |
| 12h | 0.00E+00  | 6.73E-07 | 0.00E+00 | 2.49E-08 |
| 24h | 1.13E-06  | 3.47E-07 | 1.41E-06 | 0.00E+00 |
| 36h | 3.53E-05  | 2.45E-05 | 4.77E-06 | 2.07E-06 |
| 48h | 1.19E-03  | 1.90E-03 | 8.84E-04 | 2.79E-04 |
| 72h | 5.18E-04  | 1.08E-03 | 6.76E-04 | 5.46E-04 |
|     | cgd7_5460 |          |          |          |
| 2h  | 1.05E-04  | 1.26E-05 | 1.71E-05 | 2.61E-05 |
| 6h  | 2.42E-05  | 1.60E-05 | 2.07E-04 | 5.79E-05 |
| 12h | 1.41E-07  | 1.22E-05 | 2.09E-05 | 2.05E-06 |
| 24h | 7.73E-06  | 1.95E-05 | 1.39E-04 | 5.12E-05 |
| 36h | 6.63E-05  | 1.00E-04 | 2.69E-05 | 1.70E-05 |
| 48h | 1.17E-04  | 4.04E-05 | 3.56E-05 | 3.59E-05 |
| 72h | 3.90E-05  | 1.32E-05 | 1.26E-05 | 3.47E-06 |
|     | cgd7_5470 |          |          |          |
| 2h  | 9.85E-07  | 5.50E-07 | 1.11E-06 | 9.45E-07 |
| 6h  | 2.85E-07  | 3.94E-07 | 3.69E-07 | 1.86E-07 |
| 12h | 7.58E-07  | 1.65E-06 | 2.09E-06 | 1.22E-07 |
| 24h | 3.34E-07  | 6.38E-07 | 6.11E-07 | 1.95E-07 |
| 36h | 1.61E-07  | 2.22E-07 | 2.09E-07 | 7.28E-08 |
| 48h | 5.38E-07  | 3.61E-07 | 3.88E-07 | 1.68E-07 |
| 72h | 4.70E-08  | 6.16E-08 | 1.03E-07 | 4.55E-08 |
|     | cgd7_5480 |          |          |          |
| 2h  | 6.64E-04  | 1.28E-04 | 3.91E-05 | 1.10E-04 |
| 6h  | 9.24E-05  | 1.28E-04 | 9.85E-05 | 5.53E-05 |
| 12h | 4.27E-06  | 1.18E-04 | 4.92E-05 | 1.30E-05 |
| 24h | 4.61E-05  | 2.28E-04 | 7.49E-05 | 3.13E-05 |
| 36h | 1.72E-04  | 2.72E-04 | 8.55E-05 | 4.64E-05 |
| 48h | 1.20E-04  | 7.31E-05 | 5.45E-05 | 7.25E-05 |
| 72h | 4.67E-05  | 1.42E-05 | 5.40E-05 | 6.16E-06 |
|     | cgd7_5490 |          |          |          |
| 2h  | 3.34E-04  | 2.57E-06 | 4.82E-06 | 2.93E-06 |

|          |          |          |          |          |
|----------|----------|----------|----------|----------|
| 6h       | 2.55E-07 | 1.09E-07 | 1.55E-07 | 9.86E-08 |
| 12h      | 4.65E-07 | 8.12E-07 | 4.77E-07 | 6.16E-07 |
| 24h      | 1.39E-06 | 8.22E-07 | 1.34E-06 | 1.98E-07 |
| 36h      | 7.21E-07 | 9.21E-06 | 4.45E-07 | 4.87E-07 |
| 48h      | 9.84E-07 | 3.51E-07 | 6.13E-07 | 4.45E-07 |
| 72h      | 3.99E-07 | 1.44E-07 | 2.66E-07 | 3.15E-06 |
| cgd8_470 |          |          |          |          |
| 2h       | 0.00E+00 | 0.00E+00 | 0.00E+00 | 0.00E+00 |
| 6h       | 1.63E-08 | 4.68E-05 | 7.35E-08 | 8.18E-04 |
| 12h      | 2.23E-05 | 1.83E-05 | 2.98E-05 | 1.58E-03 |
| 24h      | 9.79E-05 | 5.51E-05 | 6.98E-05 | 1.29E-03 |
| 36h      | 1.88E-04 | 1.84E-04 | 2.13E-04 | 6.41E-03 |
| 48h      | 2.56E-04 | 6.77E-05 | 1.38E-04 | 9.91E-03 |
| 72h      | 5.34E-04 | 2.67E-04 | 6.43E-04 | 4.14E-03 |
| cgd8_480 |          |          |          |          |
| 2h       | 1.93E-07 | 1.47E-07 | 3.87E-07 | 2.40E-04 |
| 6h       | 2.46E-06 | 6.24E-06 | 4.60E-06 | 2.36E-03 |
| 12h      | 1.00E-06 | 1.17E-06 | 1.06E-06 | 1.10E-03 |
| 24h      | 3.44E-06 | 2.13E-06 | 3.18E-06 | 3.03E-03 |
| 36h      | 1.82E-06 | 2.69E-06 | 4.10E-06 | 9.30E-04 |
| 48h      | 2.12E-06 | 1.34E-06 | 2.16E-06 | 1.63E-03 |
| 72h      | 8.71E-07 | 1.15E-06 | 3.04E-06 | 3.59E-04 |
| cgd8_490 |          |          |          |          |
| 2h       | 0.00E+00 | 0.00E+00 | 0.00E+00 | 0.00E+00 |
| 6h       | 0.00E+00 | 1.08E-07 | 8.63E-09 | 0.00E+00 |
| 12h      | 3.02E-05 | 1.51E-05 | 8.25E-06 | 1.03E-03 |
| 24h      | 2.05E-05 | 2.31E-05 | 1.67E-05 | 1.27E-03 |
| 36h      | 3.89E-05 | 3.46E-05 | 5.05E-05 | 1.02E-03 |
| 48h      | 6.88E-05 | 3.25E-05 | 7.18E-05 | 2.02E-03 |
| 72h      | 9.22E-05 | 4.31E-05 | 1.19E-04 | 4.42E-04 |
| cgd8_510 |          |          |          |          |
| 2h       | 9.85E-06 | 1.16E-05 | 1.91E-05 | 1.01E-03 |
| 6h       | 5.25E-06 | 9.49E-06 | 1.68E-05 | 1.82E-03 |
| 12h      | 1.37E-05 | 5.95E-06 | 1.25E-05 | 9.33E-03 |
| 24h      | 1.18E-05 | 1.37E-05 | 9.97E-06 | 3.10E-03 |
| 36h      | 8.67E-06 | 9.44E-06 | 7.90E-06 | 2.22E-03 |
| 48h      | 5.48E-06 | 2.36E-06 | 6.00E-06 | 8.60E-03 |
| 72h      | 1.44E-06 | 3.00E-06 | 5.06E-06 | 1.49E-03 |
| cgd8_590 |          |          |          |          |
| 2h       | 1.81E-07 | 1.47E-08 | 1.21E-08 | 0.00E+00 |
| 6h       | 7.63E-07 | 4.18E-06 | 1.56E-06 | 8.73E-03 |
| 12h      | 3.07E-07 | 1.09E-07 | 6.35E-08 | 4.61E-04 |
| 24h      | 2.63E-07 | 5.97E-07 | 1.70E-06 | 7.07E-03 |
| 36h      | 8.84E-07 | 1.52E-06 | 2.22E-06 | 2.62E-03 |
| 48h      | 9.98E-07 | 3.46E-07 | 1.09E-06 | 2.50E-03 |
| 72h      | 7.70E-07 | 8.81E-07 | 1.37E-06 | 0.00E+00 |
| cgd8_600 |          |          |          |          |
| 2h       | 4.05E-03 | 1.56E-03 | 3.27E-03 | 1.75E-02 |
| 6h       | 8.94E-04 | 2.21E-03 | 1.72E-03 | 1.42E-02 |
| 12h      | 1.78E-03 | 8.35E-04 | 1.16E-03 | 3.95E-02 |
| 24h      | 3.41E-03 | 4.29E-03 | 2.51E-03 | 7.12E-02 |
| 36h      | 1.42E-03 | 1.13E-03 | 1.10E-03 | 2.00E-02 |
| 48h      | 1.01E-03 | 9.76E-04 | 1.53E-03 | 2.46E-02 |

|     |          |          |          |           |
|-----|----------|----------|----------|-----------|
| 72h | 2.52E-04 | 4.02E-04 | 7.29E-04 | 4.17E-03  |
|     | cgd8_610 |          |          |           |
| 2h  | 0.00E+00 | 3.17E-06 | 8.05E-06 | 0.00E+00  |
| 6h  | 3.60E-05 | 1.43E-04 | 5.60E-05 | 2.73E-04  |
| 12h | 5.74E-05 | 5.80E-06 | 7.61E-06 | 1.03E-03  |
| 24h | 5.70E-05 | 3.17E-05 | 1.35E-04 | 2.41E-03  |
| 36h | 1.58E-04 | 7.32E-05 | 7.36E-05 | 4.27E-03  |
| 48h | 2.10E-04 | 5.51E-05 | 1.62E-04 | 2.89E-03  |
| 72h | 5.51E-04 | 3.56E-05 | 8.89E-05 | 6.30E-04  |
|     | cgd8_620 |          |          |           |
| 2h  | 0.00E+00 | 0.00E+00 | 0.00E+00 | 0.00E+00  |
| 6h  | 0.00E+00 | 0.00E+00 | 0.00E+00 | 0.00E+00  |
| 12h | 0.00E+00 | 0.00E+00 | 6.11E-09 | 0.00E+00  |
| 24h | 1.11E-07 | 5.52E-08 | 3.44E-08 | 1.97E-04  |
| 36h | 4.98E-07 | 8.56E-07 | 3.49E-07 | 3.65E-04  |
| 48h | 1.14E-04 | 1.67E-05 | 2.65E-05 | 9.67E-03  |
| 72h | 4.18E-05 | 1.07E-05 | 2.34E-05 | 3.56E-03  |
|     | cgd8_630 |          |          |           |
| 2h  | 2.36E-07 | 1.34E-08 | 1.13E-07 | 0.00E+00  |
| 6h  | 3.07E-07 | 2.10E-06 | 8.97E-07 | 2.72E-04  |
| 12h | 8.82E-08 | 0.00E+00 | 1.13E-07 | 1.62E-03  |
| 24h | 2.21E-07 | 1.10E-07 | 1.37E-06 | 5.69E-03  |
| 36h | 1.97E-06 | 9.00E-07 | 1.01E-06 | 1.05E-03  |
| 48h | 2.47E-06 | 5.81E-07 | 1.35E-06 | 3.82E-03  |
| 72h | 5.31E-07 | 1.19E-06 | 1.60E-06 | 3.92E-04  |
|     | cgd8_640 |          |          |           |
| 2h  | 3.16E-08 | 2.38E-07 | 1.86E-07 | 8.44E-05  |
| 6h  | 5.70E-08 | 2.30E-06 | 7.24E-07 | 9.14E-03  |
| 12h | 3.80E-06 | 1.87E-06 | 1.51E-06 | 1.04E-02  |
| 24h | 1.89E-06 | 2.38E-06 | 4.52E-06 | 3.74E-02  |
| 36h | 3.23E-06 | 8.25E-06 | 6.19E-06 | 2.53E-02  |
| 48h | 8.46E-06 | 4.14E-06 | 1.30E-05 | 1.89E-02  |
| 72h | 6.17E-06 | 3.04E-06 | 5.41E-06 | 8.67E-03  |
|     | cgd8_660 |          |          |           |
| 2h  | 0.00E+00 | 0.00E+00 | 0.00E+00 | -1.17E+10 |
| 6h  | 0.00E+00 | 0.00E+00 | 0.00E+00 | -1.29E+09 |
| 12h | 2.32E-04 | 1.04E-04 | 4.62E-05 | 5.52E-03  |
| 24h | 4.20E-05 | 4.24E-05 | 2.34E-05 | 2.07E-03  |
| 36h | 9.27E-05 | 6.49E-05 | 9.93E-05 | 8.17E-03  |
| 48h | 4.75E-05 | 2.67E-05 | 4.16E-05 | 9.00E-03  |
| 72h | 1.15E-05 | 5.24E-06 | 1.02E-05 | 2.05E-03  |
|     | cgd8_710 |          |          |           |
| 2h  | 0.00E+00 | 0.00E+00 | 0.00E+00 | 0.00E+00  |
| 6h  | 0.00E+00 | 0.00E+00 | 0.00E+00 | 0.00E+00  |
| 12h | 8.92E-06 | 5.02E-06 | 0.00E+00 | 1.33E-02  |
| 24h | 4.58E-06 | 2.48E-06 | 2.96E-02 | 3.69E-03  |
| 36h | 7.16E-05 | 3.39E-05 | 4.96E-03 | 1.90E-02  |
| 48h | 2.18E-05 | 1.10E-05 | 0.00E+00 | 3.97E-02  |
| 72h | 4.14E-05 | 1.60E-05 | 7.00E-03 | 4.24E-02  |
|     | cgd8_730 |          |          |           |
| 2h  | 0.00E+00 | 0.00E+00 | 1.14E-08 | 9.88E-09  |
| 6h  | 0.00E+00 | 0.00E+00 | 0.00E+00 | 0.00E+00  |
| 12h | 0.00E+00 | 0.00E+00 | 0.00E+00 | 6.90E-10  |

|     |          |          |          |          |
|-----|----------|----------|----------|----------|
| 24h | 0.00E+00 | 0.00E+00 | 8.18E-10 | 0.00E+00 |
| 36h | 3.93E-10 | 3.38E-09 | 6.24E-09 | 1.00E-08 |
| 48h | 9.24E-07 | 1.29E-06 | 4.49E-06 | 4.40E-06 |
| 72h | 8.88E-07 | 1.66E-06 | 2.23E-06 | 9.60E-07 |
|     | cgd8_740 |          |          |          |
| 2h  | 2.02E-06 | 7.40E-06 | 9.47E-07 | 1.79E-05 |
| 6h  | 4.56E-05 | 2.74E-05 | 2.01E-05 | 3.67E-05 |
| 12h | 1.36E-07 | 1.09E-06 | 5.20E-06 | 4.19E-06 |
| 24h | 2.23E-05 | 4.01E-05 | 1.95E-05 | 6.08E-05 |
| 36h | 1.65E-05 | 1.77E-05 | 5.20E-06 | 2.62E-05 |
| 48h | 2.56E-05 | 8.19E-06 | 1.18E-05 | 1.78E-05 |
| 72h | 4.52E-06 | 3.20E-06 | 1.49E-06 | 3.35E-06 |
|     | cgd8_770 |          |          |          |
| 2h  | 0.00E+00 | 0.00E+00 | 0.00E+00 | 0.00E+00 |
| 6h  | 1.87E-07 | 1.57E-06 | 2.72E-07 | 3.76E-07 |
| 12h | 5.59E-06 | 1.48E-05 | 9.22E-07 | 3.33E-06 |
| 24h | 6.02E-06 | 2.51E-05 | 1.18E-05 | 2.28E-05 |
| 36h | 3.47E-05 | 4.56E-05 | 1.37E-05 | 3.29E-05 |
| 48h | 1.23E-04 | 4.30E-05 | 3.57E-05 | 5.72E-05 |
| 72h | 1.26E-04 | 9.19E-05 | 7.03E-05 | 4.83E-05 |
|     | cgd8_780 |          |          |          |
| 2h  | 0.00E+00 | 0.00E+00 | 0.00E+00 | 0.00E+00 |
| 6h  | 0.00E+00 | 0.00E+00 | 5.77E-09 | 0.00E+00 |
| 12h | 0.00E+00 | 0.00E+00 | 0.00E+00 | 2.00E-09 |
| 24h | 4.44E-09 | 9.03E-11 | 2.88E-09 | 2.46E-08 |
| 36h | 8.73E-09 | 2.24E-08 | 7.62E-09 | 1.85E-08 |
| 48h | 2.77E-08 | 8.91E-09 | 4.55E-08 | 4.84E-08 |
| 72h | 1.37E-07 | 2.56E-06 | 5.68E-07 | 4.40E-07 |
|     | cgd8_800 |          |          |          |
| 2h  | 2.56E-05 | 4.71E-05 | 3.51E-07 | 5.51E-06 |
| 6h  | 1.09E-04 | 8.54E-05 | 1.14E-04 | 9.77E-05 |
| 12h | 8.30E-07 | 9.68E-06 | 3.24E-06 | 1.40E-05 |
| 24h | 1.64E-05 | 3.80E-05 | 9.76E-05 | 2.28E-04 |
| 36h | 3.35E-05 | 7.14E-05 | 2.61E-05 | 4.15E-05 |
| 48h | 4.73E-05 | 2.67E-05 | 4.95E-05 | 2.91E-05 |
| 72h | 2.27E-04 | 2.04E-04 | 3.81E-04 | 1.33E-04 |
|     | cgd8_810 |          |          |          |
| 2h  | 1.64E-08 | 2.98E-08 | 1.64E-08 | 1.81E-08 |
| 6h  | 1.29E-07 | 1.64E-07 | 7.86E-07 | 1.03E-06 |
| 12h | 2.31E-07 | 3.58E-07 | 2.89E-07 | 5.40E-07 |
| 24h | 1.69E-07 | 2.47E-07 | 7.39E-07 | 1.19E-06 |
| 36h | 1.17E-06 | 2.15E-06 | 9.23E-07 | 3.16E-06 |
| 48h | 1.12E-06 | 9.76E-07 | 1.31E-06 | 1.24E-06 |
| 72h | 1.64E-06 | 3.37E-06 | 5.94E-06 | 2.35E-06 |
|     | cgd8_820 |          |          |          |
| 2h  | 0.00E+00 | 0.00E+00 | 0.00E+00 | 0.00E+00 |
| 6h  | 0.00E+00 | 0.00E+00 | 0.00E+00 | 3.89E-09 |
| 12h | 1.22E-06 | 6.94E-06 | 7.63E-07 | 1.48E-06 |
| 24h | 2.30E-07 | 7.53E-07 | 1.38E-07 | 3.51E-07 |
| 36h | 2.51E-07 | 7.21E-07 | 9.66E-07 | 3.00E-06 |
| 48h | 1.68E-06 | 2.29E-06 | 1.50E-06 | 2.04E-06 |
| 72h | 2.97E-07 | 2.78E-07 | 1.35E-06 | 3.82E-07 |
|     | cgd8_840 |          |          |          |

|     |          |          |          |          |
|-----|----------|----------|----------|----------|
| 2h  | 0.00E+00 | 0.00E+00 | 0.00E+00 | 0.00E+00 |
| 6h  | 1.05E-07 | 5.86E-07 | 7.60E-07 | 1.14E-06 |
| 12h | 6.47E-09 | 2.35E-07 | 2.31E-08 | 4.04E-08 |
| 24h | 1.39E-07 | 2.72E-07 | 3.51E-07 | 1.60E-06 |
| 36h | 3.20E-07 | 6.40E-07 | 3.11E-07 | 7.61E-07 |
| 48h | 3.04E-07 | 3.14E-07 | 8.77E-07 | 6.01E-07 |
| 72h | 2.10E-07 | 2.28E-07 | 1.56E-07 | 1.12E-07 |
|     | cgd8_860 |          |          |          |
| 2h  | 1.23E-04 | 8.07E-05 | 1.03E-05 | 1.87E-04 |
| 6h  | 3.37E-05 | 4.47E-05 | 1.02E-04 | 1.02E-04 |
| 12h | 1.29E-05 | 5.53E-05 | 5.47E-05 | 5.73E-05 |
| 24h | 1.08E-04 | 3.17E-04 | 1.59E-04 | 1.47E-04 |
| 36h | 1.74E-04 | 2.23E-04 | 5.27E-05 | 2.12E-04 |
| 48h | 4.46E-04 | 6.61E-04 | 5.11E-04 | 5.38E-04 |
| 72h | 5.41E-04 | 3.27E-04 | 2.89E-04 | 2.33E-04 |
|     | cgd8_880 |          |          |          |
| 2h  | 1.45E-03 | 1.31E-03 | 1.37E-04 | 1.31E-03 |
| 6h  | 8.05E-05 | 4.15E-04 | 4.60E-04 | 6.83E-04 |
| 12h | 3.08E-04 | 1.49E-03 | 5.19E-04 | 5.92E-04 |
| 24h | 3.96E-04 | 9.43E-04 | 3.41E-04 | 8.20E-04 |
| 36h | 1.21E-04 | 4.59E-04 | 1.05E-04 | 3.34E-04 |
| 48h | 5.03E-04 | 2.52E-04 | 3.77E-04 | 4.93E-04 |
| 72h | 6.00E-04 | 3.45E-04 | 4.37E-04 | 3.15E-04 |
|     | cgd8_900 |          |          |          |
| 2h  | 8.39E-03 | 1.06E-02 | 3.12E-03 | 4.12E-02 |
| 6h  | 6.75E-03 | 2.05E-03 | 1.18E-03 | 1.75E-02 |
| 12h | 7.59E-03 | 1.77E-03 | 6.18E-03 | 1.39E-02 |
| 24h | 5.64E-04 | 4.41E-04 | 4.05E-03 | 2.07E-02 |
| 36h | 4.61E-04 | 1.18E-03 | 2.52E-03 | 1.15E-02 |
| 48h | 1.12E-03 | 2.92E-04 | 1.64E-03 | 1.19E-02 |
| 72h | 3.50E-04 | 1.35E-03 | 2.71E-03 | 3.63E-03 |
|     | cgd8_910 |          |          |          |
| 2h  | 4.76E-07 | 4.30E-07 | 5.96E-08 | 8.11E-07 |
| 6h  | 3.75E-07 | 1.78E-07 | 1.51E-07 | 3.98E-07 |
| 12h | 6.25E-08 | 4.16E-09 | 7.49E-08 | 4.22E-07 |
| 24h | 1.19E-07 | 2.93E-07 | 1.40E-07 | 1.35E-06 |
| 36h | 2.02E-07 | 3.89E-07 | 1.93E-07 | 6.82E-07 |
| 48h | 1.42E-06 | 1.02E-06 | 2.94E-06 | 2.50E-06 |
| 72h | 2.32E-06 | 2.64E-06 | 5.77E-06 | 3.25E-06 |
|     | cgd8_920 |          |          |          |
| 2h  | 0.00E+00 | 0.00E+00 | 0.00E+00 | 0.00E+00 |
| 6h  | 0.00E+00 | 0.00E+00 | 0.00E+00 | 0.00E+00 |
| 12h | 0.00E+00 | 1.66E-09 | 0.00E+00 | 1.18E-09 |
| 24h | 1.05E-09 | 5.65E-09 | 2.62E-09 | 2.90E-09 |
| 36h | 5.88E-08 | 7.40E-08 | 6.05E-08 | 3.77E-08 |
| 48h | 1.76E-06 | 1.10E-06 | 9.79E-07 | 1.55E-06 |
| 72h | 2.63E-06 | 1.02E-06 | 6.35E-06 | 4.73E-06 |
|     | cgd8_930 |          |          |          |
| 2h  | 0.00E+00 | 0.00E+00 | 0.00E+00 | 0.00E+00 |
| 6h  | 4.68E-08 | 3.92E-07 | 9.53E-08 | 8.76E-08 |
| 12h | 4.69E-09 | 0.00E+00 | 2.05E-09 | 1.72E-09 |
| 24h | 3.23E-08 | 2.05E-08 | 6.45E-08 | 2.13E-08 |
| 36h | 4.44E-08 | 7.62E-08 | 3.56E-08 | 2.06E-08 |



|     |           |          |          |          |
|-----|-----------|----------|----------|----------|
| 48h | 6.38E-08  | 4.87E-08 | 7.93E-08 | 6.04E-08 |
| 72h | 9.49E-08  | 5.69E-08 | 4.77E-08 | 1.19E-07 |
|     | cgd8_950  |          |          |          |
| 2h  | 2.56E-05  | 4.39E-04 | 0.00E+00 | 0.00E+00 |
| 6h  | 6.17E-04  | 4.37E-04 | 3.06E-03 | 2.53E-05 |
| 12h | 1.05E-04  | 1.26E-04 | 2.86E-04 | 6.64E-04 |
| 24h | 9.82E-05  | 2.68E-04 | 1.24E-03 | 1.78E-04 |
| 36h | 2.70E-04  | 5.69E-04 | 1.73E-04 | 6.66E-04 |
| 48h | 5.12E-05  | 3.74E-04 | 1.21E-03 | 1.61E-04 |
| 72h | 8.41E-05  | 1.43E-04 | 1.92E-04 | 9.08E-05 |
|     | cgd8_1000 |          |          |          |
| 2h  | 1.95E-06  | 0.00E+00 | 7.04E-07 | 1.31E-06 |
| 6h  | 5.74E-07  | 6.17E-06 | 2.52E-07 | 2.92E-08 |
| 12h | 3.60E-07  | 0.00E+00 | 2.34E-07 | 1.13E-07 |
| 24h | 2.03E-06  | 1.73E-07 | 1.46E-06 | 3.94E-07 |
| 36h | 7.69E-06  | 3.06E-07 | 2.59E-07 | 1.26E-06 |
| 48h | 3.19E-04  | 1.20E-05 | 6.28E-05 | 8.62E-05 |
| 72h | 5.99E-04  | 1.48E-04 | 1.38E-04 | 6.91E-04 |
|     | cgd8_1010 |          |          |          |
| 2h  | 1.86E-08  | 2.99E-09 | 0.00E+00 | 4.54E-08 |
| 6h  | 5.45E-09  | 1.24E-09 | 0.00E+00 | 1.77E-08 |
| 12h | 0.00E+00  | 1.21E-09 | 0.00E+00 | 5.08E-09 |
| 24h | 5.11E-09  | 9.52E-09 | 8.81E-09 | 2.73E-09 |
| 36h | 1.33E-08  | 2.45E-08 | 3.30E-08 | 3.23E-08 |
| 48h | 1.21E-06  | 4.82E-07 | 1.05E-06 | 1.02E-06 |
| 72h | 2.01E-06  | 1.03E-06 | 3.57E-06 | 5.65E-06 |
|     | cgd8_1020 |          |          |          |
| 2h  | 5.35E-06  | 1.46E-07 | 0.00E+00 | 7.67E-07 |
| 6h  | 0.00E+00  | 1.06E-06 | 0.00E+00 | 1.27E-06 |
| 12h | 0.00E+00  | 0.00E+00 | 3.74E-07 | 2.61E-07 |
| 24h | 1.68E-05  | 2.37E-06 | 1.51E-06 | 1.54E-06 |
| 36h | 2.44E-05  | 2.11E-05 | 7.67E-06 | 2.70E-05 |
| 48h | 6.86E-04  | 3.91E-04 | 1.00E-03 | 2.01E-03 |
| 72h | 1.00E-03  | 1.36E-03 | 2.62E-03 | 3.53E-03 |
|     | cgd8_1030 |          |          |          |
| 2h  | 2.01E-06  | 1.46E-06 | 5.73E-08 | 6.34E-07 |
| 6h  | 2.70E-05  | 4.15E-05 | 3.22E-05 | 2.21E-05 |
| 12h | 4.79E-08  | 1.07E-07 | 4.27E-06 | 2.21E-06 |
| 24h | 1.33E-05  | 8.70E-06 | 3.20E-05 | 1.12E-05 |
| 36h | 2.69E-05  | 1.93E-05 | 9.34E-06 | 8.33E-06 |
| 48h | 4.37E-05  | 8.82E-06 | 1.80E-05 | 2.53E-05 |
| 72h | 3.79E-05  | 1.55E-05 | 1.57E-05 | 3.73E-05 |
|     | cgd8_1040 |          |          |          |
| 2h  | 2.35E-08  | 4.72E-09 | 0.00E+00 | 0.00E+00 |
| 6h  | 0.00E+00  | 5.53E-08 | 5.35E-08 | 3.88E-09 |
| 12h | 0.00E+00  | 0.00E+00 | 1.97E-08 | 1.00E-09 |
| 24h | 1.47E-08  | 1.43E-08 | 8.01E-08 | 1.84E-08 |
| 36h | 1.14E-07  | 4.72E-08 | 4.11E-08 | 4.33E-08 |
| 48h | 1.28E-07  | 1.36E-07 | 7.76E-08 | 2.24E-07 |
| 72h | 1.08E-07  | 1.94E-07 | 5.09E-07 | 4.70E-07 |
|     | cgd8_1050 |          |          |          |
| 2h  | 1.29E-03  | 9.61E-04 | 3.30E-03 | 9.93E-03 |
| 6h  | 9.42E-04  | 3.25E-04 | 1.32E-03 | 2.31E-04 |

|     |           |          |          |          |
|-----|-----------|----------|----------|----------|
| 12h | 2.96E-03  | 4.39E-03 | 5.40E-03 | 1.61E-02 |
| 24h | 1.77E-03  | 1.21E-03 | 1.02E-03 | 3.07E-04 |
| 36h | 6.33E-04  | 6.90E-04 | 8.81E-04 | 2.13E-04 |
| 48h | 9.95E-05  | 6.61E-04 | 2.04E-03 | 3.32E-04 |
| 72h | 5.04E-04  | 2.74E-04 | 8.53E-04 | 1.59E-03 |
|     | cgd8_1060 |          |          |          |
| 2h  | 5.17E-03  | 1.66E-03 | 1.64E-03 | 3.49E-03 |
| 6h  | 2.13E-04  | 1.18E-04 | 1.61E-04 | 2.29E-04 |
| 12h | 4.79E-03  | 2.88E-03 | 4.82E-03 | 1.80E-03 |
| 24h | 3.54E-03  | 1.17E-03 | 1.06E-03 | 4.79E-04 |
| 36h | 1.03E-03  | 5.38E-04 | 4.40E-04 | 7.59E-04 |
| 48h | 3.91E-04  | 2.58E-04 | 3.49E-04 | 4.88E-04 |
| 72h | 4.14E-04  | 2.14E-04 | 1.65E-04 | 3.06E-04 |
|     | cgd8_1080 |          |          |          |
| 2h  | 1.74E-07  | 6.72E-07 | 0.00E+00 | 0.00E+00 |
| 6h  | 2.96E-06  | 1.02E-06 | 5.26E-07 | 1.32E-06 |
| 12h | 2.12E-06  | 3.82E-06 | 2.71E-06 | 3.29E-06 |
| 24h | 1.85E-06  | 3.40E-06 | 1.43E-05 | 4.50E-06 |
| 36h | 1.25E-05  | 1.78E-05 | 6.78E-06 | 1.42E-05 |
| 48h | 2.86E-05  | 9.17E-06 | 1.64E-05 | 2.28E-05 |
| 72h | 1.89E-05  | 1.26E-05 | 2.03E-05 | 2.78E-05 |
|     | cgd8_1120 |          |          |          |
| 2h  | 2.55E-05  | 1.27E-06 | 2.50E-06 | 4.31E-06 |
| 6h  | 7.50E-07  | 5.38E-07 | 6.12E-07 | 9.23E-07 |
| 12h | 1.18E-06  | 2.39E-06 | 1.97E-06 | 3.03E-06 |
| 24h | 2.17E-06  | 2.13E-06 | 1.70E-06 | 6.35E-07 |
| 36h | 9.21E-07  | 1.79E-06 | 1.11E-06 | 1.56E-06 |
| 48h | 1.99E-06  | 4.57E-07 | 9.37E-07 | 2.32E-06 |
| 72h | 9.53E-07  | 5.07E-07 | 1.75E-06 | 2.18E-06 |
|     | cgd8_1160 |          |          |          |
| 2h  | 1.12E-07  | 5.71E-07 | 7.06E-07 | 6.88E-07 |
| 6h  | 3.73E-09  | 2.05E-09 | 8.20E-08 | 5.97E-08 |
| 12h | 4.92E-10  | 3.44E-08 | 7.96E-07 | 9.26E-09 |
| 24h | 7.78E-08  | 1.15E-07 | 2.98E-07 | 5.38E-08 |
| 36h | 1.51E-06  | 1.58E-06 | 6.87E-07 | 8.94E-07 |
| 48h | 1.11E-04  | 3.27E-05 | 1.15E-04 | 3.97E-05 |
| 72h | 1.49E-06  | 1.07E-06 | 4.76E-06 | 4.07E-06 |
|     | cgd8_1170 |          |          |          |
| 2h  | 1.20E-07  | 1.56E-07 | 1.48E-07 | 1.58E-07 |
| 6h  | 1.50E-06  | 4.89E-07 | 9.57E-07 | 9.39E-07 |
| 12h | 1.94E-07  | 2.22E-07 | 1.16E-07 | 8.46E-08 |
| 24h | 3.68E-07  | 3.77E-07 | 7.16E-07 | 7.63E-07 |
| 36h | 8.69E-07  | 5.93E-07 | 5.94E-07 | 3.01E-07 |
| 48h | 1.46E-06  | 2.76E-07 | 1.27E-06 | 7.06E-07 |
| 72h | 3.51E-07  | 3.41E-07 | 8.56E-07 | 5.20E-07 |
|     | cgd8_1180 |          |          |          |
| 2h  | 0.00E+00  | 0.00E+00 | 8.95E-09 | 0.00E+00 |
| 6h  | 2.38E-09  | 9.20E-09 | 0.00E+00 | 7.22E-09 |
| 12h | 1.15E-06  | 1.45E-06 | 7.98E-07 | 1.05E-06 |
| 24h | 2.31E-07  | 1.83E-07 | 1.00E-07 | 1.50E-07 |
| 36h | 8.29E-08  | 9.04E-08 | 1.52E-07 | 3.08E-07 |
| 48h | 6.13E-08  | 1.92E-08 | 3.99E-08 | 2.67E-08 |
| 72h | 1.90E-08  | 1.78E-08 | 1.84E-08 | 1.18E-08 |

|     |           |          |          |          |
|-----|-----------|----------|----------|----------|
|     | cgd8_1200 |          |          |          |
| 2h  | 1.30E-06  | 6.79E-06 | 2.97E-06 | 6.28E-06 |
| 6h  | 3.35E-06  | 2.42E-05 | 2.51E-05 | 1.43E-05 |
| 12h | 4.79E-07  | 1.87E-06 | 1.42E-05 | 4.32E-06 |
| 24h | 5.89E-06  | 1.00E-05 | 9.81E-06 | 9.17E-06 |
| 36h | 3.20E-06  | 1.07E-05 | 9.09E-06 | 3.39E-06 |
| 48h | 8.31E-06  | 5.83E-06 | 1.93E-05 | 5.85E-06 |
| 72h | 2.58E-06  | 5.73E-06 | 2.96E-05 | 9.73E-05 |
|     | cgd8_1220 |          |          |          |
| 2h  | 0.00E+00  | 0.00E+00 | 0.00E+00 | 0.00E+00 |
| 6h  | 0.00E+00  | 0.00E+00 | 0.00E+00 | 0.00E+00 |
| 12h | 2.65E-09  | 2.79E-09 | 0.00E+00 | 0.00E+00 |
| 24h | 1.27E-09  | 1.32E-08 | 5.04E-09 | 2.83E-09 |
| 36h | 3.44E-08  | 2.38E-08 | 2.76E-08 | 2.49E-08 |
| 48h | 2.67E-07  | 1.70E-07 | 2.95E-07 | 3.86E-07 |
| 72h | 1.13E-06  | 6.45E-07 | 5.82E-06 | 3.65E-06 |
|     | cgd8_1230 |          |          |          |
| 2h  | 0.00E+00  | 0.00E+00 | 0.00E+00 | 0.00E+00 |
| 6h  | 0.00E+00  | 3.34E-09 | 1.53E-08 | 0.00E+00 |
| 12h | 9.67E-09  | 1.04E-08 | 6.85E-09 | 1.09E-08 |
| 24h | 1.78E-08  | 5.17E-08 | 1.33E-07 | 6.73E-08 |
| 36h | 2.23E-07  | 1.32E-07 | 1.63E-07 | 1.12E-07 |
| 48h | 1.44E-07  | 7.48E-08 | 3.54E-07 | 2.38E-07 |
| 72h | 8.57E-08  | 6.81E-08 | 3.61E-07 | 2.02E-07 |
|     | cgd8_1240 |          |          |          |
| 2h  | 0.00E+00  | 0.00E+00 | 0.00E+00 | 0.00E+00 |
| 6h  | 5.53E-09  | 2.38E-08 | 3.57E-08 | 1.88E-09 |
| 12h | 1.16E-08  | 4.61E-08 | 1.81E-07 | 4.01E-08 |
| 24h | 6.99E-08  | 1.27E-07 | 7.62E-07 | 2.39E-07 |
| 36h | 3.02E-07  | 8.31E-07 | 4.92E-07 | 2.27E-07 |
| 48h | 4.14E-07  | 1.42E-07 | 7.11E-07 | 3.11E-07 |
| 72h | 5.03E-08  | 6.49E-08 | 1.27E-07 | 1.59E-07 |
|     | cgd8_1260 |          |          |          |
| 2h  | 1.12E-08  | 1.09E-07 | 0.00E+00 | 0.00E+00 |
| 6h  | 7.96E-08  | 2.67E-06 | 7.56E-06 | 8.34E-07 |
| 12h | 2.61E-06  | 2.84E-05 | 1.03E-05 | 5.41E-06 |
| 24h | 2.01E-06  | 8.27E-06 | 3.41E-05 | 8.33E-06 |
| 36h | 8.53E-06  | 6.89E-05 | 1.77E-05 | 1.62E-05 |
| 48h | 4.95E-05  | 3.67E-05 | 1.13E-04 | 2.76E-05 |
| 72h | 7.12E-06  | 3.22E-05 | 9.04E-05 | 3.62E-05 |
|     | cgd8_1270 |          |          |          |
| 2h  | 1.81E-06  | 1.80E-06 | 2.67E-07 | 2.37E-06 |
| 6h  | 2.17E-06  | 6.18E-06 | 6.44E-06 | 8.29E-06 |
| 12h | 1.23E-07  | 1.38E-06 | 2.57E-06 | 7.56E-07 |
| 24h | 1.63E-06  | 1.20E-06 | 8.28E-06 | 5.06E-05 |
| 36h | 4.29E-06  | 5.33E-06 | 9.96E-06 | 4.49E-06 |
| 48h | 4.92E-06  | 1.24E-06 | 4.41E-06 | 2.28E-06 |
| 72h | 2.08E-07  | 4.31E-07 | 1.31E-06 | 5.60E-07 |
|     | cgd8_1290 |          |          |          |
| 2h  | 2.06E-07  | 2.25E-07 | 0.00E+00 | 7.67E-08 |
| 6h  | 1.10E-07  | 1.55E-07 | 3.03E-07 | 6.69E-08 |
| 12h | 4.20E-09  | 1.73E-09 | 5.91E-08 | 9.61E-09 |
| 24h | 5.53E-08  | 1.27E-07 | 3.06E-07 | 1.91E-07 |

|     |           |          |          |          |
|-----|-----------|----------|----------|----------|
| 36h | 8.00E-08  | 1.72E-07 | 8.67E-08 | 4.53E-08 |
| 48h | 1.17E-07  | 4.19E-08 | 1.79E-07 | 5.28E-08 |
| 72h | 1.15E-08  | 2.84E-08 | 5.52E-08 | 6.72E-08 |
|     | cgd8_1330 |          |          |          |
| 2h  | 1.28E-07  | 2.45E-08 | 3.37E-09 | 4.65E-08 |
| 6h  | 2.03E-07  | 2.33E-07 | 1.69E-07 | 1.52E-07 |
| 12h | 2.08E-08  | 1.02E-07 | 6.87E-08 | 1.15E-08 |
| 24h | 3.22E-08  | 4.60E-08 | 1.39E-07 | 7.38E-08 |
| 36h | 2.00E-08  | 1.14E-07 | 3.55E-08 | 3.99E-08 |
| 48h | 9.62E-08  | 2.84E-08 | 7.45E-08 | 1.74E-08 |
| 72h | 1.35E-08  | 2.32E-08 | 4.91E-08 | 3.53E-08 |
|     | cgd8_1350 |          |          |          |
| 2h  | 0.00E+00  | 0.00E+00 | 0.00E+00 | 0.00E+00 |
| 6h  | 0.00E+00  | 6.58E-10 | 0.00E+00 | 0.00E+00 |
| 12h | 5.66E-08  | 1.29E-07 | 5.84E-08 | 6.35E-08 |
| 24h | 1.77E-08  | 9.70E-09 | 9.72E-09 | 8.82E-09 |
| 36h | 3.21E-08  | 2.66E-08 | 4.53E-08 | 2.26E-08 |
| 48h | 1.24E-07  | 7.03E-08 | 1.75E-07 | 5.05E-08 |
| 72h | 4.25E-08  | 4.21E-08 | 1.29E-07 | 1.01E-07 |
|     | cgd8_1360 |          |          |          |
| 2h  | 7.74E-06  | 1.83E-06 | 8.17E-06 | 7.26E-06 |
| 6h  | 1.63E-06  | 1.59E-06 | 5.83E-04 | 7.60E-06 |
| 12h | 2.17E-06  | 5.33E-05 | 9.29E-06 | 4.40E-06 |
| 24h | 4.18E-06  | 2.26E-06 | 3.26E-06 | 7.45E-06 |
| 36h | 1.14E-06  | 3.65E-06 | 6.96E-06 | 5.95E-06 |
| 48h | 1.78E-06  | 3.15E-06 | 3.25E-06 | 4.96E-06 |
| 72h | 2.53E-07  | 1.28E-06 | 4.35E-07 | 2.16E-06 |
|     | cgd8_1370 |          |          |          |
| 2h  | 0.00E+00  | 0.00E+00 | 3.77E-07 | 0.00E+00 |
| 6h  | 0.00E+00  | 0.00E+00 | 1.06E-05 | 1.49E-05 |
| 12h | 2.40E-05  | 2.68E-05 | 2.38E-05 | 4.51E-08 |
| 24h | 2.13E-06  | 1.56E-05 | 1.33E-05 | 1.73E-05 |
| 36h | 7.66E-07  | 1.60E-04 | 2.87E-05 | 7.07E-06 |
| 48h | 1.47E-06  | 2.24E-05 | 1.34E-05 | 2.02E-06 |
| 72h | 4.28E-06  | 1.21E-04 | 1.47E-05 | 8.22E-06 |
|     | cgd8_1380 |          |          |          |
| 2h  | 6.40E-07  | 6.45E-08 | 4.52E-07 | 1.36E-06 |
| 6h  | 2.98E-07  | 7.82E-07 | 1.90E-06 | 1.58E-06 |
| 12h | 1.85E-07  | 1.04E-06 | 6.10E-08 | 5.87E-07 |
| 24h | 3.35E-07  | 4.92E-07 | 9.73E-08 | 8.80E-07 |
| 36h | 2.00E-07  | 5.78E-07 | 7.03E-08 | 2.98E-06 |
| 48h | 1.10E-07  | 1.30E-07 | 8.42E-08 | 4.13E-07 |
| 72h | 5.37E-08  | 2.38E-07 | 8.01E-08 | 6.98E-07 |
|     | cgd8_1400 |          |          |          |
| 2h  | 6.22E-07  | 1.24E-07 | 6.86E-07 | 1.33E-06 |
| 6h  | 6.08E-07  | 1.14E-06 | 9.07E-07 | 8.47E-07 |
| 12h | 2.75E-08  | 1.46E-07 | 2.42E-08 | 4.53E-08 |
| 24h | 2.10E-07  | 6.05E-07 | 2.04E-07 | 4.82E-07 |
| 36h | 1.62E-07  | 4.43E-07 | 3.56E-07 | 2.37E-06 |
| 48h | 1.38E-07  | 5.42E-07 | 1.54E-07 | 1.02E-06 |
| 72h | 4.69E-07  | 1.34E-06 | 2.33E-07 | 2.90E-06 |
|     | cgd8_1430 |          |          |          |
| 2h  | 4.16E-07  | 0.00E+00 | 0.00E+00 | 0.00E+00 |

|     |           |          |          |          |
|-----|-----------|----------|----------|----------|
| 6h  | 6.21E-08  | 2.29E-05 | 2.64E-05 | 2.31E-05 |
| 12h | 6.52E-05  | 1.94E-03 | 1.36E-04 | 1.04E-04 |
| 24h | 1.46E-05  | 2.01E-04 | 3.88E-05 | 2.24E-05 |
| 36h | 1.11E-05  | 3.84E-04 | 6.65E-05 | 1.49E-05 |
| 48h | 6.82E-06  | 1.81E-04 | 4.91E-05 | 1.75E-05 |
| 72h | 2.08E-05  | 3.39E-04 | 2.31E-05 | 6.07E-05 |
|     | cgd8_1440 |          |          |          |
| 2h  | 2.56E-06  | 2.11E-05 | 4.89E-05 | 1.16E-03 |
| 6h  | 7.66E-07  | 1.62E-05 | 5.09E-05 | 5.51E-04 |
| 12h | 4.35E-07  | 1.69E-04 | 4.36E-06 | 8.75E-05 |
| 24h | 3.56E-06  | 6.29E-05 | 7.71E-06 | 1.42E-04 |
| 36h | 2.00E-06  | 2.65E-05 | 7.62E-06 | 1.07E-04 |
| 48h | 1.32E-06  | 3.82E-05 | 1.31E-05 | 3.88E-05 |
| 72h | 5.43E-06  | 9.60E-05 | 1.61E-05 | 8.76E-05 |
|     | cgd8_1450 |          |          |          |
| 2h  | 3.15E-06  | 3.78E-06 | 1.95E-05 | 1.08E-04 |
| 6h  | 1.13E-06  | 2.45E-06 | 3.78E-06 | 4.22E-05 |
| 12h | 2.20E-07  | 1.44E-05 | 4.69E-07 | 1.74E-05 |
| 24h | 1.90E-06  | 5.25E-06 | 1.27E-06 | 2.22E-05 |
| 36h | 5.39E-07  | 1.39E-06 | 1.37E-06 | 1.73E-05 |
| 48h | 2.65E-07  | 1.77E-06 | 1.09E-06 | 9.85E-06 |
| 72h | 1.94E-07  | 1.46E-06 | 4.83E-07 | 4.18E-06 |
|     | cgd8_1500 |          |          |          |
| 2h  | 1.03E-05  | 1.41E-05 | 8.47E-05 | 3.69E-03 |
| 6h  | 3.48E-06  | 2.53E-05 | 1.63E-04 | 1.56E-04 |
| 12h | 1.69E-06  | 2.33E-05 | 1.18E-05 | 1.30E-04 |
| 24h | 6.38E-06  | 7.05E-05 | 1.49E-05 | 3.20E-04 |
| 36h | 8.36E-06  | 3.51E-05 | 5.28E-05 | 1.96E-04 |
| 48h | 3.33E-06  | 1.81E-05 | 2.41E-05 | 6.60E-05 |
| 72h | 6.08E-06  | 2.90E-05 | 8.10E-06 | 1.38E-04 |
|     | cgd8_1510 |          |          |          |
| 2h  | 0.00E+00  | 0.00E+00 | 0.00E+00 | 0.00E+00 |
| 6h  | 5.43E-06  | 1.11E-04 | 4.10E-04 | 1.65E-04 |
| 12h | 2.55E-06  | 7.33E-05 | 3.01E-05 | 2.31E-05 |
| 24h | 1.64E-05  | 4.55E-04 | 8.36E-05 | 6.54E-05 |
| 36h | 2.39E-05  | 2.40E-04 | 3.08E-04 | 2.95E-04 |
| 48h | 3.81E-05  | 8.22E-04 | 7.19E-04 | 2.70E-04 |
| 72h | 8.70E-05  | 1.78E-03 | 2.31E-04 | 1.18E-04 |
|     | cgd8_1520 |          |          |          |
| 2h  | 0.00E+00  | 0.00E+00 | 0.00E+00 | 0.00E+00 |
| 6h  | 5.27E-07  | 2.47E-06 | 1.73E-06 | 3.33E-07 |
| 12h | 9.26E-08  | 8.29E-07 | 4.66E-08 | 6.37E-08 |
| 24h | 2.28E-07  | 7.02E-06 | 1.21E-06 | 3.01E-07 |
| 36h | 5.33E-07  | 1.13E-06 | 2.17E-06 | 7.20E-07 |
| 48h | 2.29E-07  | 1.70E-06 | 1.18E-06 | 5.88E-07 |
| 72h | 9.21E-08  | 2.04E-07 | 4.22E-07 | 2.49E-07 |
|     | cgd8_1530 |          |          |          |
| 2h  | 1.23E-09  | 0.00E+00 | 0.00E+00 | 0.00E+00 |
| 6h  | 2.24E-06  | 8.48E-06 | 3.38E-05 | 3.00E-06 |
| 12h | 2.03E-07  | 2.37E-06 | 1.78E-07 | 2.48E-07 |
| 24h | 5.46E-07  | 1.15E-05 | 2.33E-06 | 7.47E-07 |
| 36h | 2.38E-06  | 2.41E-06 | 2.43E-06 | 4.61E-06 |
| 48h | 1.61E-06  | 2.32E-06 | 3.80E-06 | 1.76E-06 |

|     |           |          |          |          |
|-----|-----------|----------|----------|----------|
| 72h | 2.82E-07  | 1.85E-07 | 9.59E-08 | 3.13E-07 |
|     | cgd8_1540 |          |          |          |
| 2h  | 0.00E+00  | 0.00E+00 | 0.00E+00 | 0.00E+00 |
| 6h  | 2.89E-08  | 4.29E-06 | 6.39E-07 | 5.56E-08 |
| 12h | 1.04E-06  | 6.81E-06 | 1.19E-06 | 1.41E-06 |
| 24h | 2.28E-07  | 1.42E-05 | 4.77E-06 | 1.29E-06 |
| 36h | 7.04E-06  | 1.94E-05 | 1.71E-05 | 2.16E-05 |
| 48h | 7.74E-07  | 1.07E-05 | 7.10E-04 | 1.94E-05 |
| 72h | 2.47E-06  | 5.69E-06 | 1.33E-04 | 1.41E-05 |
|     | cgd8_1560 |          |          |          |
| 2h  | 1.48E-06  | 1.66E-06 | 2.86E-06 | 1.51E-06 |
| 6h  | 1.84E-06  | 4.90E-07 | 6.20E-06 | 6.14E-06 |
| 12h | 3.87E-07  | 3.75E-05 | 2.97E-06 | 1.27E-07 |
| 24h | 1.95E-06  | 1.89E-06 | 1.79E-06 | 2.70E-05 |
| 36h | 1.42E-05  | 7.91E-07 | 2.39E-06 | 0.00E+00 |
| 48h | 1.62E-06  | 1.85E-06 | 2.27E-06 | 6.64E-06 |
| 72h | 5.02E-07  | 1.78E-06 | 2.23E-06 | 3.43E-06 |
|     | cgd8_1600 |          |          |          |
| 2h  | 1.09E-06  | 2.15E-07 | 3.03E-07 | 9.97E-07 |
| 6h  | 4.88E-07  | 9.10E-07 | 3.77E-06 | 9.28E-06 |
| 12h | 1.06E-06  | 1.98E-06 | 1.08E-06 | 2.88E-04 |
| 24h | 6.89E-07  | 1.27E-06 | 1.44E-06 | 2.61E-05 |
| 36h | 8.98E-07  | 1.67E-06 | 1.38E-06 | 3.36E-05 |
| 48h | 1.27E-06  | 2.41E-06 | 8.26E-07 | 4.75E-05 |
| 72h | 2.43E-06  | 8.30E-06 | 2.16E-06 | 7.20E-05 |
|     | cgd8_1610 |          |          |          |
| 2h  | 7.13E-04  | 3.26E-06 | 1.96E-04 | 2.07E-05 |
| 6h  | 2.52E-03  | 2.42E-03 | 1.09E-03 | 3.06E-03 |
| 12h | 4.69E-04  | 7.93E-04 | 8.26E-05 | 5.47E-05 |
| 24h | 2.29E-04  | 1.30E-03 | 3.03E-04 | 8.04E-03 |
| 36h | 3.65E-04  | 7.40E-04 | 2.25E-04 | 7.00E-03 |
| 48h | 9.59E-04  | 9.33E-04 | 4.46E-04 | 3.81E-03 |
| 72h | 7.84E-04  | 1.69E-02 | 4.10E-04 | 2.84E-02 |
|     | cgd8_1620 |          |          |          |
| 2h  | 7.57E-09  | 0.00E+00 | 0.00E+00 | 0.00E+00 |
| 6h  | 4.10E-07  | 3.39E-07 | 3.08E-07 | 2.02E-07 |
| 12h | 6.60E-08  | 7.79E-08 | 7.28E-08 | 0.00E+00 |
| 24h | 6.21E-08  | 1.07E-06 | 3.25E-07 | 2.44E-07 |
| 36h | 5.79E-07  | 2.18E-07 | 8.07E-07 | 7.25E-06 |
| 48h | 4.58E-07  | 6.51E-07 | 5.64E-07 | 4.97E-07 |
| 72h | 2.01E-07  | 6.26E-07 | 3.66E-07 | 1.73E-06 |
|     | cgd8_1630 |          |          |          |
| 2h  | 0.00E+00  | 0.00E+00 | 0.00E+00 | 0.00E+00 |
| 6h  | 1.84E-08  | 1.63E-07 | 8.90E-08 | 2.23E-06 |
| 12h | 2.87E-08  | 1.95E-07 | 3.65E-07 | 0.00E+00 |
| 24h | 2.13E-08  | 1.05E-06 | 4.70E-07 | 1.81E-06 |
| 36h | 6.51E-07  | 9.84E-07 | 5.92E-07 | 1.12E-05 |
| 48h | 4.33E-07  | 8.93E-07 | 6.24E-07 | 4.48E-06 |
| 72h | 2.98E-07  | 1.56E-06 | 3.12E-07 | 2.90E-06 |
|     | cgd8_1650 |          |          |          |
| 2h  | 7.26E-05  | 5.18E-05 | 1.79E-03 | 1.58E-05 |
| 6h  | 2.76E-05  | 1.99E-05 | 5.73E-04 | 6.40E-06 |
| 12h | 6.91E-05  | 7.43E-05 | 6.81E-04 | 0.00E+00 |

|     |           |          |          |          |
|-----|-----------|----------|----------|----------|
| 24h | 7.40E-05  | 7.59E-05 | 2.44E-04 | 4.75E-04 |
| 36h | 6.50E-05  | 9.14E-05 | 2.33E-04 | 1.57E-04 |
| 48h | 3.27E-05  | 7.06E-05 | 2.40E-04 | 2.47E-03 |
| 72h | 2.49E-05  | 8.48E-05 | 1.02E-04 | 1.04E-02 |
|     | cgd8_1680 |          |          |          |
| 2h  | 2.21E-03  | 1.50E-03 | 1.27E-02 | 3.13E-03 |
| 6h  | 2.70E-03  | 2.81E-03 | 8.10E-03 | 0.00E+00 |
| 12h | 9.64E-04  | 2.97E-03 | 1.39E-02 | 8.76E-03 |
| 24h | 1.86E-03  | 3.47E-03 | 9.26E-04 | 1.35E-02 |
| 36h | 1.41E-03  | 1.23E-03 | 7.37E-04 | 2.65E-02 |
| 48h | 3.42E-03  | 4.31E-03 | 9.77E-04 | 1.84E-02 |
| 72h | 1.48E-03  | 3.16E-03 | 1.07E-03 | 3.67E-02 |
|     | cgd8_1690 |          |          |          |
| 2h  | 3.16E-09  | 0.00E+00 | 0.00E+00 | 0.00E+00 |
| 6h  | 0.00E+00  | 0.00E+00 | 1.75E-08 | 0.00E+00 |
| 12h | 2.49E-07  | 3.40E-07 | 2.98E-07 | 1.74E-06 |
| 24h | 1.15E-07  | 1.32E-07 | 2.65E-08 | 1.05E-06 |
| 36h | 1.59E-07  | 2.75E-07 | 9.73E-07 | 2.04E-06 |
| 48h | 8.73E-06  | 1.69E-05 | 6.20E-06 | 9.35E-03 |
| 72h | 7.68E-06  | 2.32E-05 | 1.27E-05 | 1.46E-02 |
|     | cgd8_1700 |          |          |          |
| 2h  | 0.00E+00  | 0.00E+00 | 0.00E+00 | 0.00E+00 |
| 6h  | 0.00E+00  | 0.00E+00 | 0.00E+00 | 0.00E+00 |
| 12h | 4.71E-09  | 1.12E-08 | 1.74E-08 | 0.00E+00 |
| 24h | 7.56E-09  | 1.60E-07 | 3.31E-08 | 1.61E-08 |
| 36h | 1.49E-07  | 2.97E-07 | 1.09E-07 | 1.14E-07 |
| 48h | 9.17E-06  | 9.24E-06 | 6.11E-06 | 4.06E-05 |
| 72h | 1.18E-05  | 4.59E-05 | 1.63E-05 | 4.15E-05 |
|     | cgd8_1710 |          |          |          |
| 2h  | 1.95E-07  | 1.34E-07 | 1.92E-07 | 1.28E-08 |
| 6h  | 1.28E-07  | 1.41E-07 | 9.11E-08 | 3.51E-06 |
| 12h | 1.17E-07  | 3.50E-07 | 8.63E-08 | 0.00E+00 |
| 24h | 2.71E-07  | 3.13E-07 | 2.28E-07 | 1.25E-06 |
| 36h | 3.06E-07  | 4.98E-07 | 1.45E-07 | 6.75E-07 |
| 48h | 2.25E-07  | 3.43E-07 | 6.89E-08 | 2.41E-07 |
| 72h | 9.90E-08  | 6.32E-07 | 3.45E-07 | 4.25E-07 |
|     | cgd8_1720 |          |          |          |
| 2h  | 0.00E+00  | 0.00E+00 | 0.00E+00 | 0.00E+00 |
| 6h  | 0.00E+00  | 0.00E+00 | 0.00E+00 | 0.00E+00 |
| 12h | 8.34E-09  | 8.16E-09 | 2.68E-09 | 0.00E+00 |
| 24h | 1.51E-08  | 2.10E-08 | 1.72E-09 | 0.00E+00 |
| 36h | 4.35E-08  | 1.12E-07 | 6.41E-08 | 2.04E-07 |
| 48h | 8.26E-06  | 1.61E-05 | 1.85E-05 | 1.54E-05 |
| 72h | 3.76E-06  | 1.62E-05 | 7.89E-06 | 9.36E-06 |
|     | cgd8_1740 |          |          |          |
| 2h  | 1.09E-08  | 0.00E+00 | 2.51E-08 | 0.00E+00 |
| 6h  | 6.66E-08  | 1.72E-08 | 1.08E-08 | 0.00E+00 |
| 12h | 0.00E+00  | 1.12E-08 | 3.71E-09 | 0.00E+00 |
| 24h | 3.06E-08  | 1.42E-08 | 5.81E-08 | 8.36E-08 |
| 36h | 2.97E-07  | 1.82E-07 | 1.71E-07 | 1.21E-06 |
| 48h | 1.23E-06  | 1.14E-06 | 8.32E-07 | 3.74E-06 |
| 72h | 8.25E-07  | 1.42E-06 | 1.36E-06 | 1.57E-06 |
|     | cgd7_1940 |          |          |          |

|           |          |          |          |          |
|-----------|----------|----------|----------|----------|
| 2h        | 0.00E+00 | 0.00E+00 | 0.00E+00 | 0.00E+00 |
| 6h        | 0.00E+00 | 0.00E+00 | 5.23E-09 | 0.00E+00 |
| 12h       | 3.60E-07 | 4.50E-06 | 2.27E-06 | 1.34E-06 |
| 24h       | 3.09E-07 | 5.15E-07 | 7.01E-07 | 4.36E-07 |
| 36h       | 4.35E-07 | 2.13E-06 | 2.29E-06 | 4.35E-07 |
| 48h       | 3.70E-07 | 8.18E-07 | 7.47E-07 | 2.04E-07 |
| 72h       | 9.73E-08 | 2.64E-07 | 1.45E-07 | 1.27E-07 |
| cgd7_1950 |          |          |          |          |
| 2h        | 0.00E+00 | 0.00E+00 | 1.01E-08 | 0.00E+00 |
| 6h        | 0.00E+00 | 0.00E+00 | 6.82E-08 | 0.00E+00 |
| 12h       | 1.85E-07 | 7.74E-07 | 5.34E-06 | 2.55E-05 |
| 24h       | 1.08E-06 | 2.14E-06 | 3.68E-06 | 3.97E-05 |
| 36h       | 9.45E-07 | 1.31E-05 | 1.48E-05 | 1.65E-05 |
| 48h       | 2.52E-06 | 2.10E-05 | 1.88E-05 | 4.70E-05 |
| 72h       | 4.99E-06 | 9.09E-06 | 1.27E-05 | 6.77E-05 |
| cgd7_1960 |          |          |          |          |
| 2h        | 3.82E-08 | 0.00E+00 | 0.00E+00 | 0.00E+00 |
| 6h        | 0.00E+00 | 0.00E+00 | 9.94E-09 | 0.00E+00 |
| 12h       | 3.35E-04 | 1.11E-03 | 9.41E-04 | 2.60E-03 |
| 24h       | 2.66E-05 | 1.06E-04 | 8.31E-05 | 2.53E-04 |
| 36h       | 1.30E-05 | 2.66E-04 | 1.46E-04 | 8.45E-05 |
| 48h       | 6.84E-06 | 4.83E-05 | 2.44E-05 | 2.73E-05 |
| 72h       | 3.72E-06 | 7.65E-06 | 4.19E-06 | 2.31E-05 |
| cgd7_1970 |          |          |          |          |
| 2h        | 0.00E+00 | 0.00E+00 | 0.00E+00 | 0.00E+00 |
| 6h        | 1.16E-05 | 1.61E-04 | 1.28E-04 | 9.81E-05 |
| 12h       | 1.84E-05 | 7.05E-05 | 2.71E-05 | 1.83E-04 |
| 24h       | 6.83E-06 | 2.58E-04 | 1.23E-04 | 2.67E-05 |
| 36h       | 2.09E-05 | 6.06E-05 | 6.90E-05 | 7.84E-05 |
| 48h       | 1.56E-05 | 9.11E-05 | 3.42E-05 | 6.95E-05 |
| 72h       | 7.31E-06 | 3.54E-05 | 8.49E-06 | 1.62E-05 |
| cgd7_1980 |          |          |          |          |
| 2h        | 3.84E-07 | 0.00E+00 | 8.00E-09 | 2.02E-08 |
| 6h        | 1.05E-07 | 6.70E-06 | 1.26E-06 | 1.16E-06 |
| 12h       | 4.87E-07 | 8.66E-07 | 1.35E-06 | 1.63E-06 |
| 24h       | 1.14E-07 | 5.17E-06 | 3.84E-06 | 7.60E-07 |
| 36h       | 2.92E-06 | 2.87E-06 | 2.63E-06 | 3.49E-06 |
| 48h       | 4.97E-07 | 1.30E-06 | 1.33E-06 | 1.04E-06 |
| 72h       | 3.33E-07 | 5.16E-07 | 2.13E-07 | 3.30E-07 |
| cgd7_1990 |          |          |          |          |
| 2h        | 1.15E-04 | 1.09E-04 | 3.25E-04 | 1.05E-03 |
| 6h        | 9.13E-06 | 3.40E-04 | 1.67E-04 | 3.47E-04 |
| 12h       | 5.44E-05 | 9.09E-04 | 3.25E-04 | 9.12E-04 |
| 24h       | 1.73E-05 | 4.61E-04 | 2.34E-04 | 4.72E-04 |
| 36h       | 8.80E-05 | 2.39E-04 | 1.27E-04 | 4.12E-04 |
| 48h       | 5.32E-05 | 2.17E-04 | 1.24E-04 | 2.95E-04 |
| 72h       | 4.69E-05 | 8.42E-05 | 6.71E-05 | 1.68E-04 |
| cgd7_2000 |          |          |          |          |
| 2h        | 0.00E+00 | 0.00E+00 | 1.52E-05 | 6.77E-05 |
| 6h        | 1.71E-04 | 1.01E-03 | 2.55E-04 | 4.31E-05 |
| 12h       | 1.08E-04 | 4.29E-04 | 1.68E-03 | 8.81E-05 |
| 24h       | 3.02E-04 | 1.91E-03 | 4.51E-03 | 7.07E-05 |
| 36h       | 2.48E-03 | 7.77E-04 | 5.29E-03 | 7.11E-05 |



|     |           |          |          |          |
|-----|-----------|----------|----------|----------|
| 48h | 1.48E-03  | 9.07E-04 | 7.36E-03 | 8.87E-05 |
| 72h | 9.66E-04  | 5.23E-04 | 2.37E-03 | 1.15E-04 |
|     | cgd7_2010 |          |          |          |
| 2h  | 0.00E+00  | 0.00E+00 | 0.00E+00 | 0.00E+00 |
| 6h  | 0.00E+00  | 1.59E-08 | 3.05E-09 | 4.29E-09 |
| 12h | 1.80E-07  | 2.40E-07 | 4.74E-07 | 2.60E-07 |
| 24h | 3.87E-08  | 3.32E-07 | 5.91E-07 | 5.69E-08 |
| 36h | 9.11E-07  | 6.85E-07 | 9.55E-07 | 7.51E-07 |
| 48h | 3.97E-07  | 9.87E-07 | 6.82E-07 | 4.58E-07 |
| 72h | 7.30E-07  | 3.42E-07 | 2.66E-07 | 4.00E-07 |
|     | cgd7_2020 |          |          |          |
| 2h  | 0.00E+00  | 0.00E+00 | 0.00E+00 | 0.00E+00 |
| 6h  | 5.11E-06  | 1.69E-05 | 1.36E-05 | 1.13E-05 |
| 12h | 6.04E-07  | 3.60E-07 | 1.12E-06 | 2.13E-07 |
| 24h | 4.05E-07  | 1.53E-05 | 1.96E-05 | 8.84E-07 |
| 36h | 5.95E-06  | 3.30E-06 | 4.58E-06 | 2.31E-06 |
| 48h | 2.65E-06  | 4.02E-06 | 2.88E-06 | 2.12E-06 |
| 72h | 6.75E-07  | 7.97E-07 | 7.86E-07 | 7.97E-07 |
|     | cgd7_2030 |          |          |          |
| 2h  | 4.43E-08  | 3.94E-09 | 4.19E-08 | 3.15E-08 |
| 6h  | 6.64E-07  | 1.06E-06 | 1.16E-06 | 2.05E-06 |
| 12h | 1.30E-07  | 1.75E-07 | 2.25E-07 | 2.58E-08 |
| 24h | 1.43E-07  | 1.48E-06 | 1.92E-06 | 1.54E-07 |
| 36h | 2.72E-07  | 9.51E-07 | 5.98E-07 | 3.55E-07 |
| 48h | 7.32E-07  | 9.38E-07 | 1.00E-06 | 4.96E-07 |
| 72h | 9.48E-08  | 1.71E-07 | 9.81E-08 | 2.15E-07 |
|     | cgd7_2040 |          |          |          |
| 2h  | 1.40E-06  | 2.91E-07 | 7.32E-07 | 1.32E-07 |
| 6h  | 1.58E-07  | 5.66E-07 | 3.51E-07 | 5.79E-07 |
| 12h | 7.44E-08  | 3.53E-08 | 2.01E-07 | 2.94E-08 |
| 24h | 1.60E-07  | 9.18E-07 | 9.29E-07 | 8.59E-08 |
| 36h | 3.28E-07  | 4.82E-07 | 1.84E-07 | 1.45E-07 |
| 48h | 2.29E-07  | 7.00E-08 | 2.14E-07 | 1.43E-07 |
| 72h | 4.82E-08  | 9.76E-08 | 7.14E-08 | 6.20E-08 |
|     | cgd7_2050 |          |          |          |
| 2h  | 8.16E-05  | 3.89E-05 | 1.60E-04 | 2.88E-04 |
| 6h  | 6.72E-06  | 2.01E-04 | 3.73E-04 | 4.99E-04 |
| 12h | 1.95E-06  | 1.49E-05 | 6.06E-05 | 2.13E-06 |
| 24h | 3.98E-06  | 2.14E-04 | 1.44E-04 | 5.89E-05 |
| 36h | 2.25E-05  | 4.71E-05 | 6.46E-05 | 1.25E-04 |
| 48h | 1.23E-05  | 2.39E-05 | 3.36E-05 | 7.44E-05 |
| 72h | 2.55E-06  | 8.13E-06 | 7.59E-06 | 2.41E-05 |
|     | cgd8_100  |          |          |          |
| 2h  | 2.93E-06  | 1.18E-05 | 1.87E-07 | 3.50E-06 |
| 6h  | 6.90E-05  | 6.98E-05 | 7.21E-05 | 2.47E-05 |
| 12h | 3.01E-06  | 3.50E-07 | 1.68E-04 | 2.12E-06 |
| 24h | 1.47E-05  | 1.36E-05 | 6.39E-05 | 4.37E-05 |
| 36h | 2.31E-05  | 1.29E-05 | 2.32E-05 | 1.18E-05 |
| 48h | 1.32E-05  | 3.73E-06 | 5.54E-06 | 1.25E-05 |
| 72h | 2.46E-06  | 1.33E-06 | 1.99E-06 | 2.56E-06 |
|     | cgd8_110  |          |          |          |
| 2h  | 2.42E-04  | 3.22E-04 | 5.76E-05 | 1.16E-04 |
| 6h  | 1.62E-03  | 2.53E-04 | 1.10E-03 | 4.85E-04 |

|     |          |          |          |          |
|-----|----------|----------|----------|----------|
| 12h | 2.53E-04 | 7.23E-04 | 6.86E-04 | 1.28E-04 |
| 24h | 2.72E-04 | 2.50E-04 | 6.57E-04 | 1.35E-03 |
| 36h | 3.89E-04 | 2.94E-04 | 4.31E-04 | 6.90E-04 |
| 48h | 2.69E-04 | 3.99E-04 | 5.84E-04 | 2.25E-04 |
| 72h | 1.33E-04 | 1.90E-04 | 3.88E-04 | 1.74E-04 |
|     | cgd8_150 |          |          |          |
| 2h  | 0.00E+00 | 0.00E+00 | 8.05E-09 | 0.00E+00 |
| 6h  | 4.86E-08 | 1.56E-07 | 2.25E-07 | 7.25E-08 |
| 12h | 9.93E-09 | 2.65E-09 | 2.54E-08 | 6.83E-09 |
| 24h | 2.91E-08 | 1.35E-08 | 3.19E-07 | 1.49E-07 |
| 36h | 5.10E-08 | 4.87E-08 | 4.36E-08 | 6.75E-08 |
| 48h | 8.56E-08 | 2.48E-08 | 6.74E-08 | 3.36E-08 |
| 72h | 3.30E-08 | 2.85E-08 | 2.82E-08 | 2.96E-08 |
|     | cgd8_160 |          |          |          |
| 2h  | 2.33E-07 | 1.17E-07 | 2.91E-09 | 1.68E-07 |
| 6h  | 9.94E-07 | 1.49E-06 | 5.19E-07 | 4.42E-07 |
| 12h | 9.97E-10 | 1.72E-08 | 5.26E-08 | 3.83E-08 |
| 24h | 5.85E-08 | 6.75E-08 | 3.22E-07 | 1.41E-07 |
| 36h | 2.27E-07 | 1.29E-07 | 2.13E-07 | 1.50E-07 |
| 48h | 4.76E-08 | 2.46E-08 | 4.89E-08 | 3.65E-08 |
| 72h | 1.57E-08 | 9.22E-09 | 3.36E-08 | 1.29E-08 |
|     | cgd8_170 |          |          |          |
| 2h  | 1.89E-05 | 2.42E-05 | 4.83E-06 | 2.21E-05 |
| 6h  | 4.08E-06 | 8.86E-06 | 1.02E-05 | 6.21E-06 |
| 12h | 5.68E-06 | 2.19E-06 | 1.65E-05 | 1.18E-05 |
| 24h | 7.64E-06 | 8.22E-06 | 1.17E-05 | 5.73E-06 |
| 36h | 2.47E-06 | 2.98E-06 | 2.42E-06 | 2.76E-06 |
| 48h | 3.20E-06 | 5.12E-07 | 1.16E-06 | 2.11E-06 |
| 72h | 4.24E-07 | 8.34E-07 | 3.68E-07 | 2.97E-07 |
|     | cgd8_180 |          |          |          |
| 2h  | 9.04E-06 | 1.35E-05 | 7.54E-07 | 7.80E-06 |
| 6h  | 9.86E-06 | 7.23E-06 | 2.00E-05 | 7.13E-06 |
| 12h | 2.78E-06 | 2.10E-06 | 4.28E-06 | 2.56E-06 |
| 24h | 1.04E-05 | 3.77E-06 | 2.67E-05 | 1.35E-05 |
| 36h | 4.64E-06 | 5.31E-06 | 2.95E-06 | 2.89E-06 |
| 48h | 5.99E-06 | 1.30E-06 | 4.74E-06 | 3.99E-06 |
| 72h | 1.19E-06 | 2.41E-06 | 9.44E-07 | 5.50E-07 |
|     | cgd8_190 |          |          |          |
| 2h  | 1.20E-05 | 3.98E-06 | 2.03E-06 | 8.45E-06 |
| 6h  | 2.16E-06 | 4.04E-07 | 2.39E-06 | 1.10E-06 |
| 12h | 4.45E-06 | 3.91E-06 | 1.15E-05 | 5.69E-06 |
| 24h | 7.54E-06 | 7.79E-06 | 4.55E-06 | 5.17E-06 |
| 36h | 1.84E-06 | 2.77E-06 | 2.07E-06 | 1.80E-06 |
| 48h | 1.87E-06 | 5.78E-07 | 1.79E-06 | 1.40E-06 |
| 72h | 6.37E-07 | 9.38E-07 | 1.26E-06 | 8.04E-07 |
|     | cgd8_200 |          |          |          |
| 2h  | 4.78E-09 | 9.84E-09 | 4.68E-09 | 0.00E+00 |
| 6h  | 1.28E-08 | 5.61E-09 | 0.00E+00 | 1.38E-08 |
| 12h | 1.46E-07 | 5.49E-07 | 4.15E-07 | 2.52E-07 |
| 24h | 3.75E-07 | 1.62E-07 | 4.28E-07 | 2.95E-07 |
| 36h | 6.10E-07 | 9.64E-07 | 8.15E-07 | 8.12E-07 |
| 48h | 5.20E-07 | 2.19E-07 | 4.63E-07 | 6.05E-07 |
| 72h | 4.85E-07 | 3.58E-07 | 1.03E-06 | 5.89E-07 |

|     |           |          |          |          |
|-----|-----------|----------|----------|----------|
|     | cgd8_210  |          |          |          |
| 2h  | 1.12E-05  | 3.17E-05 | 4.73E-06 | 3.30E-05 |
| 6h  | 2.75E-05  | 8.62E-06 | 3.34E-05 | 1.09E-05 |
| 12h | 1.13E-05  | 5.92E-06 | 2.79E-05 | 1.43E-05 |
| 24h | 3.82E-05  | 2.67E-05 | 5.10E-05 | 4.05E-05 |
| 36h | 2.01E-05  | 2.06E-05 | 1.67E-05 | 9.20E-06 |
| 48h | 2.16E-05  | 9.91E-06 | 1.65E-05 | 1.34E-05 |
| 72h | 1.20E-05  | 6.77E-06 | 1.46E-05 | 4.62E-06 |
|     | cgd8_220  |          |          |          |
| 2h  | 2.13E-07  | 4.69E-07 | 1.71E-07 | 1.80E-07 |
| 6h  | 3.06E-07  | 1.14E-06 | 1.26E-05 | 2.98E-06 |
| 12h | 6.36E-08  | 2.11E-07 | 1.61E-06 | 8.13E-07 |
| 24h | 2.26E-06  | 4.11E-06 | 9.12E-06 | 5.00E-06 |
| 36h | 4.59E-06  | 6.51E-06 | 6.51E-06 | 4.35E-06 |
| 48h | 1.27E-05  | 8.91E-06 | 1.25E-05 | 7.32E-06 |
| 72h | 8.21E-06  | 7.52E-06 | 9.81E-06 | 4.58E-06 |
|     | cgd8_230  |          |          |          |
| 2h  | 5.12E-06  | 4.65E-06 | 2.16E-06 | 8.22E-06 |
| 6h  | 1.59E-06  | 8.27E-07 | 4.70E-06 | 1.35E-06 |
| 12h | 1.29E-06  | 5.75E-07 | 5.06E-06 | 3.26E-06 |
| 24h | 2.91E-06  | 3.07E-06 | 5.55E-06 | 6.78E-06 |
| 36h | 1.15E-06  | 1.78E-06 | 1.29E-06 | 1.01E-06 |
| 48h | 1.72E-06  | 5.48E-07 | 1.42E-06 | 1.38E-06 |
| 72h | 3.98E-07  | 2.55E-07 | 2.26E-07 | 2.00E-07 |
|     | cgd8_240  |          |          |          |
| 2h  | 3.38E-06  | 4.52E-06 | 5.22E-08 | 3.23E-05 |
| 6h  | 1.52E-06  | 5.58E-07 | 7.27E-06 | 4.22E-06 |
| 12h | 1.11E-06  | 2.53E-06 | 3.39E-06 | 1.31E-05 |
| 24h | 5.74E-06  | 4.25E-06 | 1.28E-05 | 7.10E-06 |
| 36h | 3.18E-05  | 5.49E-05 | 3.90E-05 | 4.30E-05 |
| 48h | 7.57E-05  | 2.21E-05 | 6.91E-05 | 6.69E-05 |
| 72h | 2.68E-04  | 7.57E-05 | 2.11E-04 | 1.51E-04 |
|     | cgd7_2520 |          |          |          |
| 2h  | 2.44E-05  | 1.67E-05 | 2.56E-06 | 1.95E-05 |
| 6h  | 3.62E-05  | 1.84E-05 | 2.02E-05 | 2.21E-05 |
| 12h | 3.60E-06  | 1.89E-06 | 5.22E-06 | 9.17E-06 |
| 24h | 8.34E-06  | 1.20E-05 | 1.01E-05 | 1.09E-05 |
| 36h | 1.92E-05  | 5.25E-06 | 1.02E-05 | 4.52E-06 |
| 48h | 9.40E-06  | 6.36E-06 | 6.63E-06 | 5.51E-06 |
| 72h | 5.05E-06  | 2.07E-06 | 4.21E-06 | 1.88E-06 |
|     | cgd7_2530 |          |          |          |
| 2h  | 9.45E-06  | 4.26E-06 | 4.63E-07 | 4.80E-06 |
| 6h  | 1.46E-05  | 6.68E-06 | 7.10E-06 | 3.55E-05 |
| 12h | 8.19E-07  | 2.46E-07 | 4.01E-06 | 5.92E-06 |
| 24h | 5.26E-06  | 3.34E-06 | 8.92E-06 | 1.22E-05 |
| 36h | 1.02E-05  | 2.38E-06 | 4.24E-06 | 5.17E-06 |
| 48h | 5.79E-06  | 3.04E-06 | 2.54E-06 | 2.20E-06 |
| 72h | 1.63E-06  | 6.40E-07 | 2.92E-07 | 4.20E-07 |
|     | cgd7_2550 |          |          |          |
| 2h  | 1.61E-05  | 6.36E-06 | 1.72E-06 | 1.21E-05 |
| 6h  | 8.79E-07  | 1.12E-06 | 9.04E-07 | 3.21E-06 |
| 12h | 7.15E-06  | 1.27E-06 | 3.75E-06 | 8.41E-06 |
| 24h | 3.60E-06  | 3.34E-06 | 2.30E-06 | 2.85E-06 |

|     |           |          |          |          |
|-----|-----------|----------|----------|----------|
| 36h | 4.39E-06  | 2.04E-06 | 5.17E-06 | 3.61E-06 |
| 48h | 3.52E-06  | 1.63E-06 | 2.51E-06 | 1.15E-06 |
| 72h | 1.68E-06  | 5.32E-07 | 8.96E-07 | 1.09E-06 |
|     | cgd7_2560 |          |          |          |
| 2h  | 7.96E-05  | 3.43E-05 | 1.62E-05 | 4.30E-05 |
| 6h  | 5.26E-06  | 5.02E-06 | 4.76E-06 | 1.42E-05 |
| 12h | 1.03E-05  | 3.30E-06 | 9.06E-06 | 1.23E-05 |
| 24h | 1.68E-05  | 1.39E-05 | 6.60E-06 | 6.51E-06 |
| 36h | 3.65E-05  | 5.25E-06 | 8.08E-06 | 4.46E-06 |
| 48h | 1.24E-05  | 5.34E-06 | 4.58E-06 | 2.90E-06 |
| 72h | 1.39E-05  | 1.21E-06 | 1.02E-06 | 1.58E-06 |
|     | cgd7_2570 |          |          |          |
| 2h  | 6.83E-04  | 1.60E-03 | 2.76E-04 | 4.64E-04 |
| 6h  | 5.36E-04  | 5.24E-04 | 1.13E-04 | 2.83E-04 |
| 12h | 2.43E-04  | 1.12E-04 | 2.43E-04 | 1.66E-04 |
| 24h | 3.04E-04  | 4.40E-04 | 2.78E-04 | 1.71E-04 |
| 36h | 6.18E-04  | 1.28E-04 | 2.10E-04 | 1.12E-04 |
| 48h | 7.57E-04  | 1.77E-04 | 1.73E-04 | 3.67E-05 |
| 72h | 1.72E-04  | 4.64E-05 | 1.12E-04 | 2.56E-05 |
|     | cgd7_2580 |          |          |          |
| 2h  | 1.16E-05  | 8.80E-06 | 4.09E-07 | 3.44E-06 |
| 6h  | 1.08E-05  | 1.89E-06 | 2.06E-06 | 6.45E-06 |
| 12h | 6.31E-07  | 2.24E-07 | 2.37E-07 | 8.78E-07 |
| 24h | 2.01E-06  | 1.52E-06 | 1.57E-06 | 3.33E-06 |
| 36h | 1.32E-05  | 2.22E-06 | 3.35E-06 | 2.20E-06 |
| 48h | 3.02E-05  | 7.89E-06 | 9.90E-06 | 4.92E-06 |
| 72h | 1.80E-05  | 1.35E-05 | 1.34E-05 | 4.67E-06 |
|     | cgd7_2590 |          |          |          |
| 2h  | 1.62E-04  | 3.93E-04 | 5.04E-04 | 1.37E-02 |
| 6h  | 1.08E-04  | 2.42E-04 | 3.79E-04 | 3.57E-02 |
| 12h | 1.12E-05  | 6.26E-05 | 1.04E-04 | 1.63E-02 |
| 24h | 3.90E-05  | 1.59E-04 | 2.98E-04 | 1.94E-03 |
| 36h | 1.32E-04  | 5.14E-05 | 9.93E-05 | 4.93E-03 |
| 48h | 2.91E-04  | 2.50E-04 | 5.83E-04 | 6.46E-03 |
| 72h | 1.55E-04  | 1.20E-04 | 2.33E-04 | 5.48E-03 |
|     | cgd7_2600 |          |          |          |
| 2h  | 1.15E-03  | 2.41E-04 | 7.84E-05 | 1.26E-04 |
| 6h  | 3.55E-03  | 4.19E-04 | 1.18E-03 | 8.94E-04 |
| 12h | 1.06E-04  | 9.79E-06 | 4.44E-05 | 5.17E-05 |
| 24h | 3.39E-04  | 1.36E-04 | 5.16E-04 | 2.44E-04 |
| 36h | 6.58E-04  | 3.68E-04 | 3.65E-04 | 1.23E-04 |
| 48h | 2.96E-04  | 6.09E-04 | 2.90E-04 | 8.95E-05 |
| 72h | 9.06E-05  | 4.98E-05 | 2.66E-05 | 1.70E-05 |
|     | cgd7_2610 |          |          |          |
| 2h  | 2.20E-04  | 2.66E-04 | 1.48E-06 | 6.65E-05 |
| 6h  | 5.50E-04  | 2.75E-03 | 6.41E-03 | 2.44E-03 |
| 12h | 1.65E-05  | 2.71E-05 | 2.47E-04 | 9.29E-04 |
| 24h | 7.94E-05  | 6.47E-04 | 3.65E-03 | 1.18E-03 |
| 36h | 6.11E-04  | 6.79E-04 | 1.76E-03 | 4.32E-04 |
| 48h | 1.90E-04  | 3.05E-04 | 1.08E-03 | 3.88E-04 |
| 72h | 1.71E-04  | 1.79E-04 | 2.00E-04 | 1.47E-04 |
|     | cgd7_2620 |          |          |          |
| 2h  | 5.27E-07  | 8.27E-07 | 3.27E-07 | 1.29E-06 |

|     |           |          |          |          |
|-----|-----------|----------|----------|----------|
| 6h  | 2.45E-06  | 1.50E-07 | 2.22E-07 | 2.48E-06 |
| 12h | 1.13E-05  | 8.92E-06 | 1.14E-05 | 1.53E-05 |
| 24h | 6.53E-05  | 6.55E-06 | 1.74E-05 | 1.53E-05 |
| 36h | 1.31E-04  | 3.77E-05 | 4.41E-05 | 2.97E-05 |
| 48h | 2.60E-04  | 1.97E-05 | 2.57E-05 | 1.03E-05 |
| 72h | 9.40E-06  | 1.07E-05 | 2.56E-06 | 1.45E-06 |
|     | cgd7_2640 |          |          |          |
| 2h  | 7.94E-06  | 1.26E-05 | 8.11E-06 | 1.95E-05 |
| 6h  | 2.05E-06  | 4.65E-06 | 8.13E-06 | 1.24E-05 |
| 12h | 9.13E-07  | 2.73E-06 | 5.12E-06 | 1.01E-05 |
| 24h | 2.06E-06  | 3.70E-06 | 3.92E-06 | 9.17E-06 |
| 36h | 3.60E-06  | 3.62E-06 | 5.14E-06 | 3.20E-06 |
| 48h | 2.21E-06  | 4.43E-06 | 4.32E-06 | 3.65E-06 |
| 72h | 1.18E-06  | 5.22E-07 | 1.17E-06 | 6.02E-07 |
|     | cgd7_2670 |          |          |          |
| 2h  | 1.42E-05  | 5.37E-05 | 6.33E-05 | 8.40E-05 |
| 6h  | 4.46E-06  | 5.48E-06 | 7.80E-06 | 2.15E-05 |
| 12h | 2.72E-05  | 6.38E-05 | 4.42E-05 | 7.66E-05 |
| 24h | 1.63E-05  | 2.57E-05 | 2.01E-05 | 2.66E-05 |
| 36h | 2.25E-05  | 1.48E-05 | 2.11E-05 | 2.17E-05 |
| 48h | 4.34E-06  | 9.81E-06 | 1.18E-05 | 6.74E-06 |
| 72h | 3.79E-06  | 1.59E-06 | 3.01E-06 | 4.60E-06 |
|     | cgd8_1750 |          |          |          |
| 2h  | 0.00E+00  | 0.00E+00 | 0.00E+00 | 0.00E+00 |
| 6h  | 0.00E+00  | 0.00E+00 | 0.00E+00 | 0.00E+00 |
| 12h | 0.00E+00  | 0.00E+00 | 7.21E-08 | 0.00E+00 |
| 24h | 7.88E-08  | 9.70E-07 | 9.99E-08 | 1.08E-07 |
| 36h | 3.65E-07  | 1.14E-06 | 3.64E-07 | 1.41E-07 |
| 48h | 8.28E-06  | 2.63E-05 | 1.27E-05 | 2.31E-05 |
| 72h | 2.63E-06  | 8.64E-06 | 1.91E-06 | 5.55E-06 |
|     | cgd8_1760 |          |          |          |
| 2h  | 0.00E+00  | 3.99E-06 | 0.00E+00 | 0.00E+00 |
| 6h  | 0.00E+00  | 0.00E+00 | 0.00E+00 | 0.00E+00 |
| 12h | 3.16E-04  | 7.77E-04 | 7.10E-04 | 6.61E-03 |
| 24h | 6.78E-04  | 4.38E-05 | 5.71E-04 | 1.84E-03 |
| 36h | 2.32E-04  | 8.05E-05 | 1.20E-04 | 2.56E-03 |
| 48h | 3.37E-04  | 1.44E-05 | 7.60E-05 | 3.17E-03 |
| 72h | 4.73E-04  | 1.76E-05 | 1.51E-04 | 2.48E-03 |
|     | cgd8_1790 |          |          |          |
| 2h  | 0.00E+00  | 0.00E+00 | 0.00E+00 | 0.00E+00 |
| 6h  | 0.00E+00  | 0.00E+00 | 0.00E+00 | 0.00E+00 |
| 12h | 2.74E-06  | 2.52E-06 | 4.47E-06 | 4.11E-06 |
| 24h | 5.25E-07  | 2.13E-07 | 1.20E-06 | 8.58E-07 |
| 36h | 5.54E-07  | 7.80E-07 | 4.87E-07 | 1.75E-06 |
| 48h | 9.84E-08  | 2.17E-07 | 1.16E-07 | 6.00E-07 |
| 72h | 2.06E-08  | 1.22E-07 | 3.92E-08 | 1.14E-07 |
|     | cgd8_1830 |          |          |          |
| 2h  | 4.51E-06  | 7.11E-05 | 1.70E-06 | 3.10E-06 |
| 6h  | 5.03E-06  | 4.29E-04 | 1.31E-05 | 3.35E-05 |
| 12h | 5.71E-06  | 5.24E-04 | 1.00E-05 | 3.38E-05 |
| 24h | 4.33E-06  | 4.39E-05 | 1.05E-05 | 2.23E-05 |
| 36h | 5.11E-06  | 9.75E-05 | 5.39E-06 | 2.01E-05 |
| 48h | 3.50E-06  | 1.25E-03 | 1.01E-06 | 1.96E-05 |

|     |           |          |          |          |
|-----|-----------|----------|----------|----------|
| 72h | 8.40E-06  | 5.03E-05 | 4.99E-06 | 1.06E-05 |
|     | cgd8_1840 |          |          |          |
| 2h  | 2.21E-07  | 8.01E-08 | 2.47E-08 | 7.31E-08 |
| 6h  | 2.64E-07  | 8.24E-07 | 2.56E-07 | 7.40E-08 |
| 12h | 1.41E-07  | 1.03E-07 | 3.51E-08 | 3.21E-07 |
| 24h | 7.86E-08  | 3.02E-07 | 1.43E-07 | 2.00E-07 |
| 36h | 1.37E-07  | 2.13E-07 | 1.47E-07 | 1.14E-07 |
| 48h | 7.62E-08  | 1.49E-07 | 3.21E-08 | 2.13E-07 |
| 72h | 5.53E-08  | 1.54E-07 | 7.05E-08 | 1.27E-07 |
|     | cgd8_1860 |          |          |          |
| 2h  | 2.32E-06  | 7.42E-05 | 3.51E-07 | 2.28E-06 |
| 6h  | 4.57E-07  | 9.68E-05 | 1.79E-06 | 2.47E-06 |
| 12h | 5.34E-07  | 1.17E-04 | 5.35E-07 | 3.34E-06 |
| 24h | 7.77E-07  | 4.70E-05 | 1.22E-06 | 4.71E-06 |
| 36h | 2.60E-06  | 1.10E-04 | 2.14E-06 | 2.31E-06 |
| 48h | 3.41E-06  | 2.23E-04 | 1.05E-06 | 3.76E-06 |
| 72h | 1.96E-06  | 1.80E-04 | 1.79E-06 | 3.34E-06 |
|     | cgd8_1870 |          |          |          |
| 2h  | 1.46E-07  | 1.02E-07 | 1.14E-08 | 2.20E-08 |
| 6h  | 1.32E-08  | 4.30E-07 | 3.01E-08 | 3.89E-08 |
| 12h | 5.85E-08  | 2.37E-07 | 6.08E-08 | 7.28E-08 |
| 24h | 2.41E-08  | 2.12E-07 | 3.16E-08 | 1.24E-07 |
| 36h | 2.12E-07  | 3.89E-07 | 1.53E-07 | 1.08E-07 |
| 48h | 4.72E-07  | 1.34E-06 | 1.28E-06 | 2.56E-07 |
| 72h | 2.93E-07  | 5.85E-07 | 4.68E-07 | 2.43E-07 |
|     | cgd8_1880 |          |          |          |
| 2h  | 6.78E-09  | 0.00E+00 | 0.00E+00 | 0.00E+00 |
| 6h  | 3.21E-06  | 3.40E-05 | 5.47E-06 | 8.06E-06 |
| 12h | 2.58E-07  | 2.43E-05 | 2.06E-07 | 5.35E-06 |
| 24h | 2.49E-06  | 2.23E-05 | 2.60E-06 | 1.50E-05 |
| 36h | 9.15E-06  | 2.00E-05 | 1.29E-05 | 8.02E-06 |
| 48h | 1.18E-05  | 3.13E-05 | 2.91E-06 | 3.73E-05 |
| 72h | 1.02E-05  | 4.65E-05 | 1.15E-05 | 3.44E-05 |
|     | cgd8_1900 |          |          |          |
| 2h  | 0.00E+00  | 4.83E-08 | 2.84E-09 | 0.00E+00 |
| 6h  | 0.00E+00  | 0.00E+00 | 3.87E-09 | 0.00E+00 |
| 12h | 5.93E-07  | 6.31E-06 | 5.50E-07 | 1.02E-06 |
| 24h | 1.87E-07  | 1.40E-06 | 1.81E-07 | 3.31E-07 |
| 36h | 2.09E-07  | 2.14E-06 | 3.57E-07 | 7.36E-07 |
| 48h | 3.29E-07  | 1.58E-06 | 1.21E-07 | 1.66E-07 |
| 72h | 8.78E-08  | 1.75E-06 | 1.35E-07 | 1.62E-07 |
|     | cgd8_1910 |          |          |          |
| 2h  | 1.28E-06  | 4.03E-06 | 2.67E-07 | 1.23E-07 |
| 6h  | 2.95E-07  | 4.87E-06 | 3.66E-07 | 6.17E-07 |
| 12h | 3.54E-07  | 7.33E-06 | 1.91E-06 | 2.21E-06 |
| 24h | 1.46E-06  | 1.56E-06 | 1.31E-06 | 2.17E-06 |
| 36h | 1.12E-06  | 3.22E-06 | 1.23E-02 | 1.36E-06 |
| 48h | 2.25E-06  | 5.55E-06 | 1.18E-06 | 8.66E-07 |
| 72h | 7.34E-07  | 2.15E-06 | 5.32E-07 | 1.60E-06 |
|     | cgd8_1930 |          |          |          |
| 2h  | 2.69E-04  | 8.97E-06 | 1.82E-05 | 2.15E-05 |
| 6h  | 2.46E-05  | 1.03E-04 | 7.06E-05 | 6.25E-04 |
| 12h | 3.90E-06  | 4.61E-05 | 3.08E-06 | 4.53E-04 |

|           |          |          |          |          |
|-----------|----------|----------|----------|----------|
| 24h       | 2.47E-04 | 5.08E-05 | 2.26E-05 | 5.53E-04 |
| 36h       | 4.78E-04 | 1.89E-05 | 1.79E-04 | 2.23E-04 |
| 48h       | 9.88E-05 | 2.02E-05 | 1.38E-05 | 4.66E-04 |
| 72h       | 2.29E-05 | 1.67E-05 | 6.39E-05 | 2.39E-04 |
| cgd7_3910 |          |          |          |          |
| 2h        | 1.96E-05 | 4.48E-05 | 6.64E-05 | 3.60E-05 |
| 6h        | 1.85E-04 | 1.56E-03 | 2.23E-04 | 3.98E-04 |
| 12h       | 1.92E-05 | 1.30E-06 | 1.95E-05 | 3.99E-05 |
| 24h       | 1.27E-04 | 1.52E-05 | 4.47E-05 | 2.33E-04 |
| 36h       | 9.65E-05 | 4.10E-05 | 5.38E-05 | 5.91E-05 |
| 48h       | 1.41E-04 | 2.46E-05 | 1.44E-05 | 4.24E-05 |
| 72h       | 5.32E-05 | 4.46E-06 | 1.04E-05 | 1.81E-05 |
| cgd7_3920 |          |          |          |          |
| 2h        | 2.90E-05 | 5.29E-08 | 4.09E-08 | 1.15E-08 |
| 6h        | 2.86E-07 | 1.17E-07 | 4.97E-07 | 9.45E-09 |
| 12h       | 1.95E-06 | 3.05E-08 | 1.53E-08 | 1.27E-07 |
| 24h       | 3.96E-06 | 2.76E-07 | 4.07E-07 | 5.69E-07 |
| 36h       | 1.52E-06 | 2.96E-07 | 4.13E-07 | 2.21E-07 |
| 48h       | 6.42E-06 | 4.13E-07 | 3.07E-07 | 3.29E-07 |
| 72h       | 3.86E-06 | 3.47E-07 | 3.88E-07 | 3.33E-07 |
| cgd7_3930 |          |          |          |          |
| 2h        | 1.28E-04 | 5.44E-06 | 1.04E-05 | 1.76E-05 |
| 6h        | 8.87E-05 | 4.00E-05 | 1.03E-04 | 1.11E-04 |
| 12h       | 1.61E-05 | 3.21E-06 | 2.54E-05 | 1.65E-04 |
| 24h       | 7.82E-05 | 2.23E-05 | 1.62E-04 | 1.09E-04 |
| 36h       | 1.91E-05 | 1.90E-05 | 4.32E-05 | 4.41E-05 |
| 48h       | 1.76E-05 | 2.86E-05 | 5.34E-05 | 5.88E-05 |
| 72h       | 1.75E-05 | 3.05E-06 | 2.09E-05 | 8.81E-05 |
| cgd7_3940 |          |          |          |          |
| 2h        | 1.25E-05 | 2.41E-06 | 6.64E-06 | 2.34E-06 |
| 6h        | 1.93E-04 | 2.05E-06 | 6.67E-06 | 7.52E-06 |
| 12h       | 2.30E-04 | 6.28E-07 | 3.58E-06 | 2.01E-05 |
| 24h       | 8.45E-05 | 4.05E-06 | 1.43E-05 | 1.02E-05 |
| 36h       | 7.64E-05 | 2.30E-06 | 6.85E-06 | 4.84E-06 |
| 48h       | 4.84E-05 | 2.62E-06 | 4.28E-06 | 3.21E-06 |
| 72h       | 7.19E-05 | 4.34E-07 | 3.22E-06 | 2.68E-06 |
| cgd7_3950 |          |          |          |          |
| 2h        | 3.84E-07 | 5.56E-07 | 1.50E-07 | 1.70E-08 |
| 6h        | 2.40E-07 | 6.61E-08 | 2.14E-07 | 3.26E-07 |
| 12h       | 6.93E-08 | 0.00E+00 | 8.46E-09 | 6.58E-08 |
| 24h       | 1.30E-07 | 5.68E-08 | 7.69E-08 | 1.68E-07 |
| 36h       | 6.26E-08 | 1.15E-07 | 1.19E-07 | 5.40E-08 |
| 48h       | 6.48E-08 | 6.25E-08 | 2.58E-08 | 2.19E-08 |
| 72h       | 7.39E-08 | 1.01E-08 | 4.41E-08 | 4.71E-08 |
| cgd7_3960 |          |          |          |          |
| 2h        | 1.13E-06 | 6.83E-07 | 1.90E-06 | 2.03E-07 |
| 6h        | 1.88E-06 | 3.39E-07 | 4.57E-07 | 1.45E-06 |
| 12h       | 9.64E-07 | 6.91E-08 | 5.49E-08 | 2.05E-07 |
| 24h       | 1.60E-06 | 2.59E-07 | 3.06E-07 | 8.37E-07 |
| 36h       | 1.03E-06 | 3.42E-07 | 3.48E-07 | 3.49E-07 |
| 48h       | 1.63E-06 | 3.97E-07 | 1.33E-07 | 2.24E-07 |
| 72h       | 5.99E-07 | 7.24E-08 | 7.72E-08 | 1.61E-07 |
| cgd7_3980 |          |          |          |          |

|     |           |          |          |          |
|-----|-----------|----------|----------|----------|
| 2h  | 2.05E-05  | 2.13E-06 | 1.21E-05 | 1.77E-05 |
| 6h  | 3.73E-04  | 1.27E-04 | 8.41E-04 | 5.17E-04 |
| 12h | 5.76E-05  | 8.84E-06 | 4.04E-05 | 2.96E-04 |
| 24h | 1.14E-04  | 5.28E-05 | 2.31E-04 | 1.26E-03 |
| 36h | 3.49E-05  | 2.87E-04 | 7.30E-04 | 7.95E-04 |
| 48h | 5.15E-05  | 1.53E-04 | 4.29E-04 | 7.89E-04 |
| 72h | 3.40E-05  | 1.96E-05 | 1.93E-04 | 1.93E-04 |
|     | cgd7_3990 |          |          |          |
| 2h  | 1.11E-08  | 9.26E-10 | 1.57E-09 | 6.14E-09 |
| 6h  | 1.61E-07  | 2.39E-08 | 1.75E-08 | 3.72E-08 |
| 12h | 3.30E-07  | 1.62E-07 | 1.93E-07 | 3.55E-08 |
| 24h | 1.44E-07  | 8.43E-08 | 4.52E-08 | 1.70E-07 |
| 36h | 5.82E-07  | 2.64E-07 | 1.18E-07 | 1.74E-07 |
| 48h | 3.43E-06  | 2.83E-07 | 1.51E-07 | 2.15E-07 |
| 72h | 9.78E-07  | 7.23E-08 | 1.54E-07 | 3.01E-07 |
|     | cgd7_4010 |          |          |          |
| 2h  | 1.20E-08  | 0.00E+00 | 0.00E+00 | 0.00E+00 |
| 6h  | 0.00E+00  | 0.00E+00 | 0.00E+00 | 0.00E+00 |
| 12h | 2.31E-06  | 2.61E-07 | 4.10E-07 | 3.10E-07 |
| 24h | 2.05E-07  | 1.78E-07 | 6.00E-07 | 1.92E-07 |
| 36h | 2.40E-06  | 2.28E-07 | 2.35E-07 | 3.07E-07 |
| 48h | 8.22E-07  | 1.49E-07 | 5.51E-08 | 6.31E-08 |
| 72h | 5.89E-07  | 1.17E-08 | 4.65E-08 | 4.77E-08 |
|     | cgd7_4020 |          |          |          |
| 2h  | 4.21E-07  | 2.48E-09 | 1.60E-08 | 2.54E-08 |
| 6h  | 9.62E-08  | 0.00E+00 | 5.03E-09 | 0.00E+00 |
| 12h | 3.35E-03  | 1.33E-03 | 8.95E-03 | 4.59E-03 |
| 24h | 4.26E-04  | 3.44E-04 | 7.85E-04 | 2.85E-04 |
| 36h | 5.13E-04  | 5.08E-05 | 1.67E-04 | 3.34E-04 |
| 48h | 1.23E-04  | 2.73E-05 | 1.69E-05 | 3.75E-05 |
| 72h | 1.47E-05  | 4.04E-07 | 1.04E-06 | 9.20E-07 |
|     | cgd7_4030 |          |          |          |
| 2h  | 0.00E+00  | 0.00E+00 | 0.00E+00 | 0.00E+00 |
| 6h  | 7.41E-08  | 0.00E+00 | 4.09E-09 | 3.73E-09 |
| 12h | 1.67E-05  | 9.60E-07 | 5.70E-06 | 1.65E-06 |
| 24h | 1.01E-06  | 5.18E-07 | 7.94E-07 | 2.91E-07 |
| 36h | 8.59E-06  | 2.85E-07 | 5.14E-07 | 1.15E-06 |
| 48h | 3.79E-06  | 5.59E-07 | 1.67E-07 | 2.51E-07 |
| 72h | 2.01E-06  | 1.71E-08 | 9.41E-08 | 9.37E-08 |
|     | cgd7_4040 |          |          |          |
| 2h  | 1.99E-07  | 1.44E-09 | 0.00E+00 | 1.71E-09 |
| 6h  | 1.33E-07  | 0.00E+00 | 7.01E-09 | 7.46E-09 |
| 12h | 3.73E-07  | 5.32E-08 | 1.86E-07 | 2.00E-07 |
| 24h | 8.12E-08  | 3.02E-08 | 7.61E-08 | 8.04E-08 |
| 36h | 1.49E-06  | 8.64E-08 | 8.77E-08 | 1.79E-07 |
| 48h | 1.61E-06  | 1.27E-07 | 1.04E-07 | 2.34E-07 |
| 72h | 9.10E-07  | 2.05E-08 | 8.75E-08 | 7.76E-08 |
|     | cgd8_260  |          |          |          |
| 2h  | 7.18E-07  | 2.42E-07 | 2.63E-06 | 1.62E-06 |
| 6h  | 1.21E-06  | 1.65E-06 | 2.66E-06 | 6.99E-07 |
| 12h | 5.33E-08  | 1.16E-06 | 3.40E-08 | 4.07E-07 |
| 24h | 5.50E-07  | 1.57E-06 | 3.71E-07 | 2.98E-06 |
| 36h | 1.06E-06  | 8.88E-07 | 2.67E-07 | 9.12E-07 |



|     |          |          |          |          |
|-----|----------|----------|----------|----------|
| 48h | 2.63E-07 | 1.08E-06 | 6.26E-07 | 1.14E-06 |
| 72h | 1.55E-07 | 5.68E-07 | 7.57E-08 | 2.94E-07 |
|     | cgd8_270 |          |          |          |
| 2h  | 1.52E-08 | 0.00E+00 | 1.53E-07 | 5.60E-08 |
| 6h  | 2.33E-07 | 3.01E-07 | 7.78E-07 | 2.55E-07 |
| 12h | 1.07E-08 | 1.32E-09 | 6.85E-09 | 2.45E-08 |
| 24h | 6.82E-08 | 2.67E-07 | 5.29E-08 | 2.72E-07 |
| 36h | 9.32E-08 | 1.12E-07 | 4.09E-08 | 2.30E-07 |
| 48h | 4.81E-08 | 8.00E-06 | 9.28E-08 | 1.26E-07 |
| 72h | 4.02E-08 | 9.32E-08 | 2.49E-08 | 1.14E-07 |
|     | cgd8_280 |          |          |          |
| 2h  | 9.69E-08 | 5.37E-07 | 3.80E-07 | 2.83E-06 |
| 6h  | 4.73E-08 | 3.69E-08 | 1.16E-07 | 2.81E-07 |
| 12h | 1.28E-06 | 1.07E-07 | 2.44E-07 | 5.53E-07 |
| 24h | 3.38E-07 | 1.48E-07 | 2.81E-07 | 6.69E-07 |
| 36h | 1.16E-07 | 1.04E-07 | 5.01E-08 | 2.19E-07 |
| 48h | 2.20E-08 | 1.39E-07 | 6.36E-08 | 7.01E-08 |
| 72h | 5.47E-08 | 6.03E-08 | 1.70E-08 | 5.20E-08 |
|     | cgd8_290 |          |          |          |
| 2h  | 0.00E+00 | 0.00E+00 | 0.00E+00 | 0.00E+00 |
| 6h  | 1.14E-08 | 7.37E-08 | 3.14E-08 | 1.05E-08 |
| 12h | 2.66E-09 | 3.69E-09 | 1.77E-08 | 1.23E-08 |
| 24h | 5.05E-08 | 9.29E-08 | 3.39E-08 | 2.06E-07 |
| 36h | 1.91E-07 | 9.59E-08 | 5.45E-08 | 1.07E-07 |
| 48h | 2.64E-08 | 6.81E-08 | 2.63E-08 | 5.21E-08 |
| 72h | 2.59E-08 | 2.99E-08 | 7.50E-09 | 4.28E-08 |
|     | cgd8_340 |          |          |          |
| 2h  | 5.79E-07 | 8.51E-07 | 8.92E-07 | 2.52E-06 |
| 6h  | 7.50E-07 | 3.75E-06 | 1.32E-06 | 4.06E-06 |
| 12h | 1.32E-06 | 6.29E-07 | 1.45E-07 | 4.74E-06 |
| 24h | 1.53E-06 | 4.37E-06 | 6.88E-07 | 4.65E-06 |
| 36h | 1.56E-06 | 2.64E-06 | 8.88E-07 | 3.15E-06 |
| 48h | 5.38E-07 | 1.93E-06 | 4.81E-07 | 1.63E-06 |
| 72h | 8.00E-07 | 2.05E-06 | 3.79E-07 | 1.54E-06 |
|     | cgd8_350 |          |          |          |
| 2h  | 3.63E-07 | 1.63E-07 | 1.17E-06 | 1.22E-07 |
| 6h  | 3.76E-06 | 3.12E-06 | 3.03E-06 | 2.02E-06 |
| 12h | 1.18E-07 | 7.02E-08 | 8.17E-08 | 1.61E-07 |
| 24h | 5.49E-07 | 9.80E-07 | 1.66E-07 | 3.14E-06 |
| 36h | 4.79E-07 | 4.22E-07 | 3.01E-07 | 3.40E-07 |
| 48h | 1.58E-07 | 2.40E-07 | 8.61E-08 | 1.53E-07 |
| 72h | 6.01E-08 | 7.29E-08 | 2.08E-08 | 6.57E-08 |
|     | cgd8_360 |          |          |          |
| 2h  | 3.76E-05 | 2.63E-04 | 5.89E-05 | 2.69E-04 |
| 6h  | 3.35E-05 | 2.48E-04 | 3.18E-05 | 2.12E-04 |
| 12h | 4.68E-05 | 1.47E-04 | 1.00E-05 | 1.36E-04 |
| 24h | 5.15E-05 | 3.91E-04 | 9.85E-06 | 4.74E-04 |
| 36h | 3.06E-05 | 2.11E-04 | 2.59E-05 | 1.75E-04 |
| 48h | 2.48E-05 | 2.36E-04 | 1.30E-05 | 1.55E-04 |
| 72h | 3.69E-06 | 1.84E-04 | 5.95E-06 | 4.43E-05 |
|     | cgd8_380 |          |          |          |
| 2h  | 3.47E-09 | 0.00E+00 | 1.54E-08 | 7.86E-08 |
| 6h  | 1.62E-09 | 0.00E+00 | 0.00E+00 | 4.41E-09 |

|     |           |          |          |          |
|-----|-----------|----------|----------|----------|
| 12h | 7.18E-08  | 4.55E-08 | 5.82E-09 | 1.02E-07 |
| 24h | 1.19E-07  | 2.74E-08 | 6.80E-08 | 2.95E-08 |
| 36h | 8.61E-08  | 9.38E-08 | 7.55E-08 | 1.42E-07 |
| 48h | 2.00E-07  | 1.64E-07 | 9.36E-08 | 2.37E-07 |
| 72h | 8.64E-08  | 1.37E-07 | 1.37E-07 | 1.81E-07 |
|     | cgd8_410  |          |          |          |
| 2h  | 2.43E-04  | 8.66E-04 | 1.92E-04 | 2.87E-03 |
| 6h  | 2.47E-05  | 5.92E-05 | 1.22E-05 | 1.48E-04 |
| 12h | 1.77E-04  | 1.36E-03 | 1.54E-04 | 2.45E-03 |
| 24h | 8.58E-04  | 2.01E-03 | 2.72E-04 | 3.00E-03 |
| 36h | 2.61E-04  | 1.35E-03 | 2.18E-04 | 1.48E-03 |
| 48h | 1.18E-04  | 1.91E-03 | 1.44E-04 | 8.56E-04 |
| 72h | 4.62E-05  | 1.10E-03 | 5.53E-05 | 6.05E-04 |
|     | cgd8_420  |          |          |          |
| 2h  | 0.00E+00  | 0.00E+00 | 0.00E+00 | 0.00E+00 |
| 6h  | 1.16E-07  | 0.00E+00 | 0.00E+00 | 8.34E-08 |
| 12h | 1.05E-05  | 4.29E-05 | 3.40E-06 | 1.12E-04 |
| 24h | 1.70E-05  | 2.11E-04 | 2.92E-06 | 1.09E-04 |
| 36h | 1.61E-05  | 2.00E-04 | 1.37E-05 | 2.27E-04 |
| 48h | 9.07E-06  | 2.67E-04 | 3.20E-05 | 4.21E-04 |
| 72h | 8.59E-06  | 2.14E-04 | 2.93E-05 | 1.97E-04 |
|     | cgd8_430  |          |          |          |
| 2h  | 4.98E-05  | 8.25E-05 | 7.98E-05 | 1.41E-04 |
| 6h  | 3.95E-04  | 6.99E-04 | 2.84E-04 | 3.49E-04 |
| 12h | 2.75E-05  | 8.68E-05 | 1.52E-05 | 2.74E-04 |
| 24h | 2.61E-04  | 3.82E-04 | 4.89E-05 | 6.17E-04 |
| 36h | 6.52E-05  | 7.37E-05 | 4.52E-05 | 1.20E-04 |
| 48h | 4.46E-06  | 7.35E-05 | 1.84E-05 | 6.13E-05 |
| 72h | 3.21E-06  | 8.31E-06 | 4.66E-06 | 6.53E-06 |
|     | cgd8_450  |          |          |          |
| 2h  | 2.64E-05  | 1.60E-05 | 4.32E-05 | 4.15E-04 |
| 6h  | 1.06E-05  | 3.78E-05 | 5.80E-06 | 2.79E-05 |
| 12h | 1.06E-05  | 1.58E-05 | 2.41E-06 | 1.55E-04 |
| 24h | 3.10E-05  | 8.07E-05 | 2.53E-06 | 5.36E-05 |
| 36h | 2.11E-05  | 9.63E-05 | 1.90E-05 | 1.32E-04 |
| 48h | 5.17E-06  | 6.58E-05 | 1.65E-05 | 5.11E-05 |
| 72h | 6.07E-06  | 6.36E-05 | 1.45E-05 | 5.29E-05 |
|     | cgd7_2070 |          |          |          |
| 2h  | 0.00E+00  | 0.00E+00 | 0.00E+00 | 3.21E-05 |
| 6h  | 1.20E-08  | 2.82E-06 | 2.29E-07 | 0.00E+00 |
| 12h | 1.89E-05  | 7.83E-04 | 5.61E-05 | 7.29E-04 |
| 24h | 2.14E-05  | 2.26E-04 | 3.00E-05 | 1.90E-04 |
| 36h | 1.78E-05  | 1.04E-03 | 1.39E-04 | 7.70E-04 |
| 48h | 1.17E-05  | 1.36E-04 | 6.10E-05 | 4.07E-04 |
| 72h | 1.48E-06  | 1.62E-05 | 9.97E-06 | 1.21E-05 |
|     | cgd7_2080 |          |          |          |
| 2h  | 1.40E-07  | 4.57E-06 | 1.56E-06 | 4.68E-06 |
| 6h  | 5.25E-07  | 2.47E-05 | 1.87E-06 | 8.07E-06 |
| 12h | 6.06E-07  | 1.80E-06 | 1.79E-07 | 8.70E-07 |
| 24h | 2.30E-06  | 6.98E-06 | 4.98E-06 | 1.44E-06 |
| 36h | 5.79E-06  | 1.12E-05 | 3.76E-06 | 8.80E-06 |
| 48h | 2.88E-06  | 4.41E-05 | 9.88E-06 | 6.00E-05 |
| 72h | 3.44E-06  | 1.52E-05 | 1.54E-05 | 8.73E-05 |

|     |           |          |          |          |
|-----|-----------|----------|----------|----------|
|     | cgd7_2090 |          |          |          |
| 2h  | 6.78E-06  | 9.37E-05 | 3.16E-05 | 9.64E-05 |
| 6h  | 1.81E-05  | 1.02E-04 | 5.24E-05 | 8.97E-05 |
| 12h | 2.03E-06  | 2.56E-05 | 4.73E-06 | 1.58E-05 |
| 24h | 7.37E-06  | 6.50E-05 | 3.36E-05 | 1.14E-04 |
| 36h | 1.17E-05  | 1.33E-05 | 5.60E-06 | 4.60E-05 |
| 48h | 1.62E-06  | 1.97E-05 | 1.59E-05 | 7.60E-05 |
| 72h | 2.00E-06  | 9.60E-06 | 4.27E-06 | 2.40E-05 |
|     | cgd7_2100 |          |          |          |
| 2h  | 3.17E-09  | 1.52E-08 | 2.92E-08 | 1.51E-08 |
| 6h  | 7.42E-07  | 1.00E-06 | 9.43E-07 | 1.33E-06 |
| 12h | 3.33E-07  | 6.59E-07 | 3.34E-07 | 2.88E-06 |
| 24h | 1.90E-07  | 1.29E-06 | 4.20E-07 | 4.92E-07 |
| 36h | 1.19E-06  | 1.25E-06 | 2.19E-06 | 1.77E-06 |
| 48h | 2.85E-07  | 6.37E-07 | 4.03E-07 | 1.30E-06 |
| 72h | 2.17E-07  | 9.74E-08 | 1.60E-07 | 3.78E-07 |
|     | cgd7_2110 |          |          |          |
| 2h  | 1.12E-02  | 1.64E-02 | 2.14E-03 | 1.66E-01 |
| 6h  | 6.54E-01  | 6.02E-02 | 2.14E-01 | 2.96E-01 |
| 12h | 2.56E-02  | 3.52E-02 | 3.77E-01 | 3.92E-03 |
| 24h | 1.73E-03  | 3.16E-02 | 2.68E-02 | 1.24E-02 |
| 36h | 7.67E-02  | 6.48E-03 | 2.75E-03 | 5.87E-03 |
| 48h | 4.11E-02  | 4.87E-03 | 4.02E-04 | 7.61E-03 |
| 72h | 4.51E-03  | 1.40E-03 | 1.19E-03 | 1.41E-02 |
|     | cgd7_2120 |          |          |          |
| 2h  | 0.00E+00  | 0.00E+00 | 2.94E-07 | 2.04E-06 |
| 6h  | 1.59E-06  | 3.78E-06 | 2.56E-05 | 9.39E-05 |
| 12h | 3.37E-06  | 1.75E-05 | 4.60E-06 | 2.73E-05 |
| 24h | 2.67E-06  | 3.48E-04 | 4.86E-05 | 1.82E-04 |
| 36h | 4.46E-05  | 2.99E-04 | 3.76E-05 | 4.24E-04 |
| 48h | 9.80E-06  | 1.22E-04 | 7.97E-05 | 7.12E-04 |
| 72h | 5.69E-06  | 2.85E-04 | 7.51E-05 | 2.05E-04 |
|     | cgd7_2130 |          |          |          |
| 2h  | 2.53E-08  | 1.65E-08 | 2.26E-08 | 3.67E-08 |
| 6h  | 9.23E-08  | 1.03E-06 | 5.56E-07 | 1.25E-06 |
| 12h | 4.36E-09  | 3.46E-08 | 1.48E-08 | 7.76E-08 |
| 24h | 2.80E-08  | 6.59E-07 | 1.99E-07 | 4.91E-07 |
| 36h | 3.72E-07  | 2.16E-07 | 1.78E-07 | 1.32E-06 |
| 48h | 1.06E-07  | 2.20E-07 | 1.43E-07 | 2.04E-06 |
| 72h | 1.13E-07  | 1.68E-07 | 1.84E-07 | 1.08E-06 |
|     | cgd7_2140 |          |          |          |
| 2h  | 0.00E+00  | 0.00E+00 | 0.00E+00 | 0.00E+00 |
| 6h  | 3.17E-08  | 2.76E-07 | 1.12E-07 | 1.14E-07 |
| 12h | 3.07E-07  | 1.17E-07 | 4.03E-08 | 1.14E-06 |
| 24h | 6.57E-08  | 1.00E-06 | 3.37E-07 | 4.36E-07 |
| 36h | 8.64E-07  | 3.97E-07 | 3.14E-07 | 1.83E-06 |
| 48h | 2.40E-07  | 1.52E-07 | 2.64E-07 | 1.30E-06 |
| 72h | 7.83E-08  | 7.23E-08 | 1.78E-07 | 6.66E-07 |
|     | cgd7_2160 |          |          |          |
| 2h  | 1.91E-06  | 1.19E-06 | 5.09E-06 | 3.08E-05 |
| 6h  | 3.80E-06  | 3.83E-05 | 3.47E-05 | 9.88E-05 |
| 12h | 1.33E-07  | 4.66E-06 | 5.68E-07 | 9.56E-07 |
| 24h | 2.14E-06  | 2.55E-05 | 9.17E-06 | 2.07E-05 |

|     |           |          |          |          |
|-----|-----------|----------|----------|----------|
| 36h | 5.22E-06  | 3.88E-06 | 3.45E-06 | 2.24E-05 |
| 48h | 2.49E-06  | 3.88E-06 | 3.30E-06 | 2.40E-05 |
| 72h | 3.60E-07  | 6.33E-07 | 3.06E-06 | 7.13E-06 |
|     | cgd7_2170 |          |          |          |
| 2h  | 9.26E-06  | 3.04E-05 | 5.22E-05 | 3.71E-04 |
| 6h  | 1.11E-05  | 2.36E-04 | 2.06E-04 | 3.26E-04 |
| 12h | 3.06E-06  | 1.20E-04 | 3.94E-05 | 9.16E-05 |
| 24h | 1.86E-05  | 1.59E-04 | 1.03E-04 | 5.27E-04 |
| 36h | 1.61E-05  | 4.17E-05 | 2.51E-05 | 2.97E-04 |
| 48h | 1.44E-05  | 3.76E-05 | 4.09E-05 | 2.42E-04 |
| 72h | 1.37E-06  | 4.71E-06 | 2.70E-06 | 0.00E+00 |
|     | cgd7_2190 |          |          |          |
| 2h  | 1.35E-07  | 3.34E-07 | 4.34E-07 | 1.41E-06 |
| 6h  | 6.37E-07  | 4.23E-07 | 7.02E-07 | 3.94E-06 |
| 12h | 1.25E-08  | 3.07E-07 | 1.90E-07 | 3.24E-08 |
| 24h | 3.61E-07  | 4.91E-07 | 3.99E-07 | 1.47E-06 |
| 36h | 2.25E-07  | 1.34E-07 | 1.61E-07 | 6.31E-07 |
| 48h | 1.25E-07  | 1.36E-07 | 1.83E-07 | 9.87E-07 |
| 72h | 4.26E-08  | 1.06E-07 | 1.44E-07 | 6.59E-07 |
|     | cgd7_2200 |          |          |          |
| 2h  | 2.17E-06  | 1.46E-05 | 1.17E-05 | 1.30E-05 |
| 6h  | 1.58E-06  | 2.61E-06 | 1.30E-05 | 5.32E-05 |
| 12h | 1.14E-06  | 3.56E-06 | 5.54E-06 | 1.37E-05 |
| 24h | 1.87E-06  | 8.49E-06 | 5.92E-06 | 4.86E-05 |
| 36h | 5.16E-06  | 3.11E-06 | 3.91E-06 | 6.81E-05 |
| 48h | 1.37E-06  | 2.35E-06 | 3.12E-06 | 1.07E-04 |
| 72h | 9.20E-07  | 3.14E-06 | 2.10E-06 | 1.90E-05 |
|     | cgd7_2210 |          |          |          |
| 2h  | 2.16E-07  | 1.25E-07 | 6.82E-08 | 1.58E-07 |
| 6h  | 0.00E+00  | 3.17E-09 | 2.79E-08 | 3.68E-08 |
| 12h | 1.20E-06  | 4.13E-07 | 2.08E-06 | 1.40E-06 |
| 24h | 6.16E-07  | 4.31E-07 | 5.25E-07 | 6.18E-07 |
| 36h | 9.10E-07  | 3.88E-07 | 2.43E-06 | 1.58E-06 |
| 48h | 4.49E-07  | 1.96E-07 | 8.65E-07 | 7.01E-07 |
| 72h | 1.47E-07  | 6.86E-08 | 4.55E-07 | 2.56E-07 |
|     | cgd7_2260 |          |          |          |
| 2h  | 7.26E-07  | 2.52E-07 | 1.53E-06 | 5.24E-07 |
| 6h  | 1.83E-06  | 1.37E-06 | 2.55E-06 | 2.58E-06 |
| 12h | 8.09E-08  | 1.09E-08 | 8.92E-07 | 5.43E-07 |
| 24h | 8.46E-07  | 5.56E-06 | 2.09E-06 | 2.12E-06 |
| 36h | 9.74E-07  | 3.77E-07 | 9.65E-07 | 8.64E-07 |
| 48h | 5.12E-07  | 4.26E-07 | 7.21E-07 | 5.49E-07 |
| 72h | 2.28E-07  | 1.74E-07 | 8.37E-07 | 2.02E-07 |
|     | cgd7_2270 |          |          |          |
| 2h  | 2.15E-06  | 5.37E-07 | 3.72E-06 | 9.74E-07 |
| 6h  | 1.02E-06  | 1.41E-06 | 2.70E-07 | 8.65E-07 |
| 12h | 4.47E-06  | 1.93E-06 | 4.33E-06 | 1.66E-06 |
| 24h | 1.26E-06  | 1.78E-06 | 1.65E-06 | 1.19E-06 |
| 36h | 1.69E-06  | 1.43E-06 | 2.96E-06 | 3.27E-06 |
| 48h | 8.40E-07  | 9.52E-07 | 2.76E-06 | 1.46E-06 |
| 72h | 4.98E-07  | 7.50E-07 | 2.03E-06 | 5.66E-07 |
|     | cgd7_2280 |          |          |          |
| 2h  | 1.06E-05  | 2.45E-06 | 1.03E-05 | 4.22E-06 |

|     |           |          |          |          |
|-----|-----------|----------|----------|----------|
| 6h  | 3.98E-05  | 6.36E-05 | 5.24E-05 | 1.83E-05 |
| 12h | 4.33E-06  | 9.97E-07 | 1.40E-05 | 1.18E-05 |
| 24h | 9.08E-06  | 8.95E-06 | 2.64E-05 | 1.28E-05 |
| 36h | 9.93E-06  | 6.54E-06 | 6.91E-06 | 8.43E-06 |
| 48h | 2.98E-06  | 2.78E-06 | 5.60E-06 | 2.72E-06 |
| 72h | 1.59E-06  | 3.13E-07 | 3.26E-06 | 2.33E-06 |
|     | cgd7_2290 |          |          |          |
| 2h  | 6.51E-05  | 5.59E-05 | 1.49E-04 | 1.00E-04 |
| 6h  | 1.18E-05  | 1.52E-04 | 9.36E-05 | 2.19E-05 |
| 12h | 4.18E-05  | 7.54E-05 | 4.00E-04 | 7.52E-05 |
| 24h | 4.02E-05  | 2.09E-04 | 1.42E-04 | 1.09E-04 |
| 36h | 3.25E-05  | 6.30E-05 | 8.33E-05 | 4.56E-05 |
| 48h | 3.08E-05  | 5.83E-05 | 3.88E-04 | 2.80E-05 |
| 72h | 1.69E-05  | 3.53E-05 | 5.43E-05 | 1.15E-05 |
|     | cgd7_2300 |          |          |          |
| 2h  | 1.51E-05  | 2.10E-06 | 1.22E-05 | 7.35E-06 |
| 6h  | 2.56E-05  | 1.58E-05 | 2.54E-05 | 1.52E-05 |
| 12h | 5.34E-06  | 8.27E-07 | 1.42E-05 | 1.15E-05 |
| 24h | 1.27E-05  | 9.06E-06 | 1.41E-05 | 1.81E-05 |
| 36h | 1.26E-05  | 4.59E-06 | 1.14E-05 | 1.31E-05 |
| 48h | 4.49E-06  | 1.71E-06 | 5.83E-06 | 3.65E-06 |
| 72h | 2.05E-06  | 8.29E-07 | 2.86E-06 | 1.48E-06 |
|     | cgd7_2310 |          |          |          |
| 2h  | 0.00E+00  | 0.00E+00 | 0.00E+00 | 0.00E+00 |
| 6h  | 0.00E+00  | 2.27E-07 | 0.00E+00 | 3.87E-09 |
| 12h | 8.43E-08  | 7.15E-07 | 9.55E-07 | 2.37E-07 |
| 24h | 7.17E-07  | 4.23E-06 | 6.07E-06 | 3.05E-06 |
| 36h | 2.76E-06  | 7.60E-06 | 1.06E-05 | 3.25E-06 |
| 48h | 7.15E-06  | 1.20E-05 | 1.82E-05 | 9.23E-06 |
| 72h | 4.94E-06  | 1.66E-05 | 2.18E-05 | 1.24E-05 |
|     | cgd7_2320 |          |          |          |
| 2h  | 0.00E+00  | 0.00E+00 | 0.00E+00 | 0.00E+00 |
| 6h  | 1.49E-08  | 4.05E-09 | 9.46E-09 | 8.60E-09 |
| 12h | 1.01E-08  | 9.89E-09 | 4.73E-09 | 3.94E-09 |
| 24h | 1.93E-08  | 1.49E-08 | 1.02E-07 | 6.59E-08 |
| 36h | 9.84E-08  | 1.05E-07 | 1.33E-07 | 1.79E-07 |
| 48h | 3.95E-07  | 2.48E-07 | 4.67E-07 | 4.31E-07 |
| 72h | 1.29E-07  | 2.34E-07 | 3.10E-07 | 2.06E-07 |
|     | cgd7_2330 |          |          |          |
| 2h  | 0.00E+00  | 2.01E-06 | 0.00E+00 | 6.54E-07 |
| 6h  | 9.86E-04  | 5.54E-03 | 1.45E-02 | 5.09E-03 |
| 12h | 1.37E-04  | 4.44E-04 | 2.63E-03 | 3.56E-04 |
| 24h | 3.28E-04  | 1.01E-03 | 7.68E-03 | 2.37E-03 |
| 36h | 5.82E-04  | 1.01E-03 | 2.91E-03 | 8.62E-04 |
| 48h | 6.12E-04  | 1.12E-03 | 1.81E-03 | 7.32E-04 |
| 72h | 3.25E-05  | 3.07E-04 | 6.97E-04 | 2.63E-05 |
|     | cgd7_2340 |          |          |          |
| 2h  | 0.00E+00  | 2.00E-08 | 0.00E+00 | 1.47E-08 |
| 6h  | 1.55E-08  | 0.00E+00 | 0.00E+00 | 0.00E+00 |
| 12h | 9.29E-07  | 1.13E-06 | 4.71E-06 | 2.24E-06 |
| 24h | 6.05E-07  | 4.97E-06 | 2.12E-06 | 1.66E-06 |
| 36h | 7.41E-07  | 5.34E-06 | 1.00E-05 | 4.52E-06 |
| 48h | 3.36E-06  | 6.54E-06 | 7.85E-06 | 3.06E-06 |

|     |           |          |          |          |
|-----|-----------|----------|----------|----------|
| 72h | 9.26E-08  | 1.97E-06 | 1.78E-06 | 2.35E-07 |
|     | cgd7_2360 |          |          |          |
| 2h  | 5.56E-08  | 2.47E-08 | 7.51E-09 | 2.95E-09 |
| 6h  | 6.07E-07  | 1.68E-07 | 8.88E-07 | 5.69E-07 |
| 12h | 1.22E-07  | 7.08E-08 | 1.69E-07 | 1.05E-07 |
| 24h | 2.29E-07  | 1.27E-07 | 6.19E-07 | 7.55E-07 |
| 36h | 2.59E-07  | 3.43E-07 | 5.28E-07 | 4.13E-07 |
| 48h | 9.70E-07  | 5.04E-07 | 8.10E-07 | 3.69E-07 |
| 72h | 1.16E-07  | 9.18E-08 | 7.25E-07 | 2.13E-07 |
|     | cgd7_2370 |          |          |          |
| 2h  | 0.00E+00  | 0.00E+00 | 1.07E-05 | 0.00E+00 |
| 6h  | 8.21E-07  | 1.87E-06 | 1.13E-06 | 0.00E+00 |
| 12h | 7.00E-06  | 2.48E-05 | 1.74E-06 | 1.86E-05 |
| 24h | 3.08E-06  | 3.72E-05 | 4.44E-04 | 6.10E-05 |
| 36h | 4.76E-05  | 3.06E-04 | 4.98E-04 | 3.18E-04 |
| 48h | 3.62E-05  | 2.27E-04 | 3.50E-04 | 1.56E-04 |
| 72h | 3.66E-05  | 5.88E-04 | 1.38E-04 | 1.19E-04 |
|     | cgd8_1940 |          |          |          |
| 2h  | 1.26E-06  | 8.01E-07 | 2.49E-07 | 2.22E-05 |
| 6h  | 4.65E-07  | 2.40E-06 | 4.92E-07 | 1.86E-05 |
| 12h | 1.30E-08  | 2.39E-07 | 6.87E-06 | 2.09E-07 |
| 24h | 3.62E-07  | 3.94E-07 | 3.17E-07 | 4.23E-07 |
| 36h | 5.22E-07  | 2.41E-07 | 1.14E-07 | 5.35E-07 |
| 48h | 2.39E-07  | 1.02E-07 | 2.33E-07 | 7.11E-06 |
| 72h | 8.37E-07  | 2.93E-08 | 4.73E-08 | 1.30E-07 |
|     | cgd8_1960 |          |          |          |
| 2h  | 0.00E+00  | 0.00E+00 | 0.00E+00 | 0.00E+00 |
| 6h  | 3.81E-06  | 0.00E+00 | 0.00E+00 | 6.18E-06 |
| 12h | 1.87E-08  | 0.00E+00 | 0.00E+00 | 6.35E-06 |
| 24h | 5.56E-06  | 2.16E-06 | 2.55E-06 | 3.63E-07 |
| 36h | 2.24E-05  | 2.23E-05 | 1.03E-05 | 1.04E-06 |
| 48h | 1.10E-03  | 4.74E-04 | 1.99E-03 | 2.51E-04 |
| 72h | 2.36E-03  | 1.23E-03 | 4.29E-03 | 6.31E-05 |
|     | cgd8_1970 |          |          |          |
| 2h  | 1.88E-06  | 1.67E-06 | 1.94E-07 | 6.73E-05 |
| 6h  | 1.53E-07  | 5.69E-07 | 1.14E-07 | 6.48E-06 |
| 12h | 2.86E-08  | 5.01E-08 | 6.15E-08 | 4.31E-07 |
| 24h | 2.01E-07  | 2.05E-07 | 7.88E-08 | 4.79E-08 |
| 36h | 2.12E-07  | 1.49E-07 | 7.64E-08 | 1.58E-07 |
| 48h | 1.40E-06  | 2.30E-07 | 8.40E-07 | 3.28E-06 |
| 72h | 1.50E-06  | 4.53E-07 | 1.20E-06 | 2.17E-06 |
|     | cgd8_1980 |          |          |          |
| 2h  | 0.00E+00  | 0.00E+00 | 0.00E+00 | 2.30E-07 |
| 6h  | 5.70E-05  | 6.07E-05 | 5.39E-05 | 2.52E-05 |
| 12h | 3.06E-06  | 3.06E-05 | 6.60E-06 | 1.50E-05 |
| 24h | 7.07E-05  | 2.45E-05 | 3.29E-05 | 3.90E-06 |
| 36h | 4.96E-05  | 1.98E-04 | 4.17E-05 | 4.38E-06 |
| 48h | 1.33E-04  | 1.14E-04 | 1.51E-04 | 1.40E-04 |
| 72h | 3.69E-04  | 2.37E-04 | 4.25E-04 | 6.89E-05 |
|     | cgd8_1990 |          |          |          |
| 2h  | 0.00E+00  | 0.00E+00 | 3.78E-09 | 0.00E+00 |
| 6h  | 0.00E+00  | 0.00E+00 | 0.00E+00 | 1.90E-07 |
| 12h | 0.00E+00  | 5.24E-10 | 9.32E-08 | 7.63E-08 |

|           |          |          |          |          |
|-----------|----------|----------|----------|----------|
| 24h       | 1.73E-06 | 2.36E-07 | 5.66E-08 | 5.65E-08 |
| 36h       | 8.32E-07 | 1.17E-06 | 4.77E-07 | 9.16E-07 |
| 48h       | 2.92E-05 | 7.21E-06 | 3.03E-05 | 1.14E-04 |
| 72h       | 4.95E-05 | 2.06E-05 | 1.40E-04 | 1.68E-04 |
| cgd8_2000 |          |          |          |          |
| 2h        | 1.28E-05 | 7.37E-06 | 3.76E-06 | 1.10E-05 |
| 6h        | 1.72E-06 | 1.15E-06 | 4.84E-07 | 1.35E-06 |
| 12h       | 1.79E-06 | 5.13E-06 | 3.74E-06 | 4.21E-06 |
| 24h       | 4.68E-06 | 1.15E-05 | 2.27E-06 | 2.63E-06 |
| 36h       | 2.44E-06 | 2.23E-06 | 1.60E-06 | 1.08E-06 |
| 48h       | 2.37E-06 | 1.17E-06 | 2.23E-06 | 8.15E-06 |
| 72h       | 2.99E-06 | 2.23E-06 | 5.23E-06 | 1.08E-06 |
| cgd8_2010 |          |          |          |          |
| 2h        | 2.28E-07 | 6.47E-07 | 0.00E+00 | 1.48E-06 |
| 6h        | 3.49E-07 | 1.80E-07 | 1.96E-07 | 8.05E-07 |
| 12h       | 4.75E-08 | 2.28E-08 | 6.18E-08 | 3.50E-07 |
| 24h       | 2.43E-07 | 2.77E-04 | 2.24E-07 | 4.80E-08 |
| 36h       | 3.79E-07 | 5.45E-07 | 1.60E-07 | 2.59E-07 |
| 48h       | 8.46E-07 | 3.77E-07 | 4.25E-07 | 5.57E-06 |
| 72h       | 1.27E-06 | 4.62E-07 | 2.77E-06 | 3.79E-07 |
| cgd8_2020 |          |          |          |          |
| 2h        | 1.94E-05 | 1.32E-05 | 4.92E-06 | 1.82E-04 |
| 6h        | 4.42E-06 | 5.37E-06 | 3.23E-06 | 1.56E-04 |
| 12h       | 0.00E+00 | 5.33E-06 | 3.53E-08 | 2.27E-05 |
| 24h       | 1.32E-05 | 4.50E-05 | 4.76E-06 | 1.02E-05 |
| 36h       | 2.76E-05 | 1.13E-05 | 1.10E-05 | 1.88E-05 |
| 48h       | 5.74E-05 | 3.07E-05 | 2.44E-05 | 8.55E-05 |
| 72h       | 3.46E-05 | 2.97E-05 | 9.96E-05 | 5.38E-05 |
| cgd8_2030 |          |          |          |          |
| 2h        | 9.15E-06 | 4.85E-06 | 2.16E-06 | 1.29E-05 |
| 6h        | 1.45E-06 | 1.38E-06 | 9.26E-08 | 8.84E-07 |
| 12h       | 2.05E-06 | 5.83E-06 | 2.26E-06 | 1.09E-05 |
| 24h       | 6.19E-06 | 3.41E-06 | 1.49E-06 | 5.79E-07 |
| 36h       | 3.93E-06 | 1.32E-06 | 2.12E-06 | 7.51E-07 |
| 48h       | 2.26E-06 | 1.00E-06 | 1.02E-06 | 3.27E-06 |
| 72h       | 2.20E-05 | 7.19E-07 | 2.21E-06 | 6.01E-06 |
| cgd8_2040 |          |          |          |          |
| 2h        | 3.59E-06 | 2.80E-06 | 0.00E+00 | 0.00E+00 |
| 6h        | 2.06E-06 | 3.76E-07 | 0.00E+00 | 0.00E+00 |
| 12h       | 1.17E-04 | 2.78E-04 | 5.26E-05 | 2.44E-05 |
| 24h       | 8.16E-05 | 1.26E-04 | 1.77E-05 | 1.30E-05 |
| 36h       | 1.74E-04 | 7.11E-05 | 7.05E-05 | 3.78E-05 |
| 48h       | 2.69E-04 | 6.11E-05 | 9.45E-05 | 2.19E-04 |
| 72h       | 1.88E-04 | 9.02E-05 | 3.13E-04 | 9.00E-05 |
| cgd8_2050 |          |          |          |          |
| 2h        | 1.85E-05 | 8.69E-06 | 3.44E-06 | 6.85E-05 |
| 6h        | 1.07E-06 | 4.71E-06 | 6.10E-07 | 9.85E-06 |
| 12h       | 2.22E-06 | 1.71E-06 | 8.17E-06 | 1.26E-05 |
| 24h       | 2.02E-05 | 1.49E-05 | 9.25E-06 | 8.02E-07 |
| 36h       | 5.43E-06 | 2.74E-06 | 1.27E-06 | 1.22E-06 |
| 48h       | 3.56E-06 | 1.44E-06 | 1.38E-06 | 3.06E-06 |
| 72h       | 7.01E-07 | 3.07E-07 | 4.34E-07 | 2.76E-07 |
| cgd8_2060 |          |          |          |          |

|     |           |          |          |          |
|-----|-----------|----------|----------|----------|
| 2h  | 9.55E-07  | 1.05E-06 | 2.48E-08 | 1.57E-06 |
| 6h  | 4.84E-08  | 2.79E-08 | 2.87E-08 | 2.72E-07 |
| 12h | 0.00E+00  | 0.00E+00 | 0.00E+00 | 2.56E-06 |
| 24h | 4.56E-08  | 2.66E-08 | 9.44E-09 | 1.15E-08 |
| 36h | 1.27E-07  | 1.12E-07 | 8.38E-08 | 4.80E-08 |
| 48h | 9.23E-07  | 3.40E-07 | 1.20E-06 | 2.12E-04 |
| 72h | 1.39E-06  | 9.41E-07 | 3.00E-06 | 3.96E-06 |
|     | cgd8_2070 |          |          |          |
| 2h  | 1.41E-06  | 8.02E-06 | 1.57E-07 | 1.31E-08 |
| 6h  | 9.99E-08  | 2.00E-07 | 4.37E-09 | 0.00E+00 |
| 12h | 0.00E+00  | 0.00E+00 | 9.55E-07 | 0.00E+00 |
| 24h | 9.08E-08  | 7.17E-08 | 2.73E-08 | 8.15E-05 |
| 36h | 2.75E-07  | 2.87E-07 | 8.79E-08 | 2.54E-07 |
| 48h | 4.80E-06  | 3.54E-06 | 1.09E-05 | 1.31E-05 |
| 72h | 3.10E-06  | 1.20E-05 | 6.90E-06 | 1.92E-05 |
|     | cgd8_2080 |          |          |          |
| 2h  | 1.77E-04  | 2.84E-04 | 1.63E-07 | 3.56E-05 |
| 6h  | 3.50E-07  | 1.81E-05 | 3.73E-08 | 4.33E-06 |
| 12h | 4.37E-03  | 1.87E-02 | 2.28E-03 | 2.61E-03 |
| 24h | 1.94E-03  | 1.17E-03 | 3.48E-04 | 2.05E-04 |
| 36h | 4.03E-04  | 9.53E-04 | 7.97E-04 | 2.80E-03 |
| 48h | 7.20E-04  | 5.22E-04 | 4.57E-04 | 4.41E-04 |
| 72h | 3.19E-04  | 6.73E-04 | 5.90E-04 | 7.63E-04 |
|     | cgd8_2090 |          |          |          |
| 2h  | 4.71E-03  | 3.62E-03 | 1.85E-04 | 8.19E-03 |
| 6h  | 5.41E-04  | 1.10E-03 | 2.83E-04 | 4.34E-04 |
| 12h | 7.10E-04  | 4.71E-04 | 7.43E-04 | 1.58E-03 |
| 24h | 1.32E-03  | 1.69E-02 | 5.97E-04 | 7.04E-04 |
| 36h | 4.62E-04  | 9.00E-04 | 2.14E-04 | 7.04E-04 |
| 48h | 5.54E-04  | 5.09E-04 | 4.06E-04 | 5.60E-04 |
| 72h | 1.73E-04  | 2.94E-04 | 2.27E-04 | 4.97E-04 |
|     | cgd8_2100 |          |          |          |
| 2h  | 3.62E-04  | 1.35E-03 | 9.44E-05 | 3.62E-03 |
| 6h  | 1.29E-04  | 2.08E-04 | 5.14E-05 | 6.09E-04 |
| 12h | 3.19E-04  | 1.08E-03 | 2.01E-04 | 4.75E-04 |
| 24h | 3.44E-04  | 9.83E-04 | 1.27E-04 | 1.34E-04 |
| 36h | 1.68E-04  | 4.20E-04 | 6.21E-05 | 2.40E-04 |
| 48h | 1.62E-04  | 2.00E-04 | 1.26E-04 | 1.62E-04 |
| 72h | 8.63E-05  | 1.77E-04 | 2.62E-04 | 3.34E-04 |
|     | cgd8_2110 |          |          |          |
| 2h  | 1.51E-08  | 0.00E+00 | 1.33E-08 | 1.55E-09 |
| 6h  | 1.77E-06  | 2.69E-06 | 8.10E-07 | 1.53E-06 |
| 12h | 6.70E-08  | 2.36E-07 | 5.09E-08 | 9.87E-08 |
| 24h | 1.87E-07  | 5.22E-07 | 6.59E-07 | 1.45E-06 |
| 36h | 8.75E-07  | 2.01E-06 | 2.49E-07 | 1.61E-06 |
| 48h | 3.67E-07  | 4.38E-07 | 4.72E-07 | 2.58E-07 |
| 72h | 9.99E-08  | 3.63E-07 | 7.04E-07 | 5.71E-07 |
|     | cgd8_2120 |          |          |          |
| 2h  | 2.17E-07  | 1.38E-06 | 1.78E-07 | 1.83E-06 |
| 6h  | 1.23E-06  | 3.01E-06 | 1.30E-06 | 1.94E-06 |
| 12h | 5.09E-08  | 8.97E-08 | 2.47E-07 | 3.47E-07 |
| 24h | 3.36E-07  | 6.25E-07 | 6.81E-07 | 2.31E-06 |
| 36h | 3.04E-07  | 1.42E-06 | 2.50E-07 | 5.36E-07 |



|     |           |          |          |          |
|-----|-----------|----------|----------|----------|
| 48h | 2.35E-07  | 2.24E-07 | 2.14E-07 | 3.18E-07 |
| 72h | 2.04E-08  | 1.39E-07 | 1.24E-07 | 8.36E-08 |
|     | cgd8_2130 |          |          |          |
| 2h  | 1.77E-03  | 3.08E-03 | 6.20E-04 | 5.31E-03 |
| 6h  | 1.06E-03  | 4.30E-03 | 1.41E-03 | 1.19E-04 |
| 12h | 1.10E-03  | 1.61E-03 | 8.25E-04 | 2.77E-05 |
| 24h | 8.43E-04  | 7.94E-04 | 1.72E-03 | 7.67E-05 |
| 36h | 1.37E-04  | 3.44E-03 | 4.28E-04 | 3.84E-04 |
| 48h | 1.09E-04  | 2.52E-04 | 1.12E-03 | 1.05E-03 |
| 72h | 1.80E-04  | 6.17E-04 | 9.72E-04 | 1.66E-03 |
|     | cgd8_2140 |          |          |          |
| 2h  | 1.30E-07  | 5.17E-08 | 9.16E-09 | 1.24E-07 |
| 6h  | 6.01E-08  | 1.93E-07 | 2.24E-07 | 4.90E-08 |
| 12h | 1.98E-07  | 1.61E-07 | 2.66E-07 | 3.05E-07 |
| 24h | 2.66E-07  | 9.45E-07 | 5.50E-07 | 1.40E-07 |
| 36h | 2.06E-07  | 3.12E-07 | 1.10E-07 | 1.70E-07 |
| 48h | 2.13E-07  | 1.79E-07 | 2.61E-07 | 9.09E-08 |
| 72h | 1.24E-07  | 2.69E-07 | 4.82E-07 | 3.31E-07 |
|     | cgd8_2150 |          |          |          |
| 2h  | 0.00E+00  | 0.00E+00 | 0.00E+00 | 4.20E-09 |
| 6h  | 2.57E-08  | 2.72E-07 | 2.86E-07 | 1.27E-07 |
| 12h | 2.59E-06  | 2.75E-06 | 1.42E-06 | 1.63E-06 |
| 24h | 7.91E-07  | 1.90E-06 | 3.42E-06 | 2.07E-06 |
| 36h | 4.84E-06  | 1.12E-05 | 4.70E-06 | 7.50E-06 |
| 48h | 5.49E-06  | 3.29E-06 | 4.29E-06 | 3.30E-06 |
| 72h | 6.06E-07  | 2.38E-06 | 1.69E-06 | 1.32E-06 |
|     | cgd8_2160 |          |          |          |
| 2h  | 0.00E+00  | 0.00E+00 | 0.00E+00 | 0.00E+00 |
| 6h  | 6.87E-08  | 6.17E-07 | 5.98E-08 | 4.00E-07 |
| 12h | 8.89E-07  | 2.01E-06 | 3.66E-07 | 1.49E-06 |
| 24h | 3.37E-07  | 6.53E-07 | 1.61E-07 | 3.62E-07 |
| 36h | 3.60E-07  | 1.18E-06 | 6.97E-07 | 9.89E-07 |
| 48h | 6.30E-07  | 6.33E-07 | 3.45E-07 | 4.62E-07 |
| 72h | 2.13E-07  | 8.28E-07 | 4.99E-07 | 4.04E-07 |
|     | cgd8_2180 |          |          |          |
| 2h  | 0.00E+00  | 0.00E+00 | 0.00E+00 | 0.00E+00 |
| 6h  | 0.00E+00  | 0.00E+00 | 0.00E+00 | 0.00E+00 |
| 12h | 0.00E+00  | 6.92E-09 | 0.00E+00 | 0.00E+00 |
| 24h | 5.35E-09  | 3.29E-08 | 4.05E-10 | 4.25E-07 |
| 36h | 5.37E-07  | 6.39E-07 | 6.48E-08 | 2.63E-07 |
| 48h | 1.61E-05  | 9.32E-06 | 4.58E-06 | 4.53E-06 |
| 72h | 1.20E-06  | 2.42E-06 | 2.50E-06 | 1.12E-06 |
|     | cgd8_2190 |          |          |          |
| 2h  | 1.29E-06  | 5.23E-07 | 2.61E-08 | 3.30E-08 |
| 6h  | 7.01E-08  | 6.17E-08 | 4.96E-09 | 0.00E+00 |
| 12h | 3.76E-10  | 2.63E-08 | 7.85E-09 | 0.00E+00 |
| 24h | 1.13E-08  | 8.94E-09 | 2.15E-08 | 1.94E-06 |
| 36h | 6.44E-08  | 2.14E-07 | 1.47E-08 | 3.32E-08 |
| 48h | 1.08E-07  | 1.97E-07 | 1.08E-07 | 7.66E-08 |
| 72h | 4.11E-08  | 1.43E-07 | 3.01E-07 | 1.52E-07 |
|     | cgd8_2200 |          |          |          |
| 2h  | 1.45E-07  | 3.37E-07 | 6.06E-08 | 6.97E-08 |
| 6h  | 1.76E-06  | 7.54E-07 | 1.48E-06 | 8.40E-06 |

|           |          |          |          |          |
|-----------|----------|----------|----------|----------|
| 12h       | 5.11E-08 | 1.90E-07 | 2.75E-07 | 2.30E-06 |
| 24h       | 6.49E-07 | 3.51E-07 | 5.63E-07 | 3.73E-06 |
| 36h       | 1.23E-07 | 6.36E-07 | 1.52E-07 | 7.61E-08 |
| 48h       | 3.89E-07 | 7.59E-08 | 2.88E-07 | 1.30E-06 |
| 72h       | 1.97E-08 | 1.63E-07 | 6.79E-08 | 4.26E-08 |
| cgd8_2210 |          |          |          |          |
| 2h        | 0.00E+00 | 0.00E+00 | 2.32E-08 | 0.00E+00 |
| 6h        | 1.81E-06 | 8.89E-07 | 9.65E-07 | 1.89E-04 |
| 12h       | 5.57E-07 | 5.56E-06 | 1.46E-05 | 4.25E-04 |
| 24h       | 2.07E-06 | 2.87E-06 | 4.08E-05 | 5.55E-05 |
| 36h       | 1.57E-06 | 1.38E-05 | 1.94E-05 | 1.05E-05 |
| 48h       | 2.05E-05 | 9.58E-06 | 1.29E-04 | 7.15E-05 |
| 72h       | 7.71E-07 | 3.23E-06 | 1.17E-05 | 7.09E-06 |
| cgd8_2220 |          |          |          |          |
| 2h        | 0.00E+00 | 0.00E+00 | 0.00E+00 | 0.00E+00 |
| 6h        | 0.00E+00 | 0.00E+00 | 0.00E+00 | 0.00E+00 |
| 12h       | 0.00E+00 | 1.83E-08 | 2.14E-07 | 5.65E-07 |
| 24h       | 3.40E-07 | 1.33E-07 | 4.45E-07 | 3.18E-07 |
| 36h       | 6.33E-07 | 3.77E-06 | 2.98E-06 | 1.96E-07 |
| 48h       | 1.01E-05 | 1.15E-05 | 3.27E-05 | 5.80E-05 |
| 72h       | 6.59E-06 | 1.38E-05 | 1.88E-05 | 1.31E-05 |
| cgd8_2260 |          |          |          |          |
| 2h        | 3.49E-09 | 9.10E-08 | 1.02E-08 | 4.48E-08 |
| 6h        | 5.11E-07 | 9.77E-07 | 6.33E-07 | 1.10E-06 |
| 12h       | 1.60E-07 | 7.70E-07 | 5.26E-07 | 6.75E-07 |
| 24h       | 3.32E-07 | 6.03E-07 | 6.85E-07 | 4.23E-07 |
| 36h       | 7.90E-07 | 1.60E-06 | 2.41E-06 | 1.95E-07 |
| 48h       | 4.41E-07 | 3.82E-07 | 7.62E-07 | 2.89E-06 |
| 72h       | 1.74E-07 | 4.50E-07 | 6.50E-07 | 2.87E-07 |
| cgd8_2270 |          |          |          |          |
| 2h        | 0.00E+00 | 0.00E+00 | 0.00E+00 | 0.00E+00 |
| 6h        | 6.55E-09 | 1.43E-09 | 0.00E+00 | 0.00E+00 |
| 12h       | 4.24E-07 | 4.63E-06 | 2.14E-06 | 3.82E-06 |
| 24h       | 5.38E-07 | 1.20E-06 | 4.11E-07 | 3.82E-07 |
| 36h       | 4.31E-07 | 2.43E-06 | 1.48E-06 | 2.51E-07 |
| 48h       | 9.06E-07 | 5.62E-07 | 1.86E-06 | 4.17E-06 |
| 72h       | 3.10E-06 | 3.14E-06 | 4.00E-06 | 1.01E-06 |
| cgd8_2300 |          |          |          |          |
| 2h        | 1.95E-03 | 4.84E-03 | 2.83E-03 | 1.30E-04 |
| 6h        | 5.74E-03 | 3.26E-03 | 2.07E-03 | 1.00E-03 |
| 12h       | 9.15E-04 | 4.62E-03 | 6.53E-04 | 1.16E-03 |
| 24h       | 1.60E-03 | 2.97E-03 | 2.95E-03 | 5.01E-04 |
| 36h       | 5.55E-03 | 5.57E-03 | 5.14E-04 | 8.58E-05 |
| 48h       | 4.61E-03 | 1.95E-03 | 6.06E-04 | 3.45E-04 |
| 72h       | 1.64E-04 | 1.97E-03 | 2.99E-04 | 5.23E-05 |
| cgd8_2320 |          |          |          |          |
| 2h        | 9.02E-07 | 2.22E-05 | 0.00E+00 | 0.00E+00 |
| 6h        | 1.02E-03 | 1.13E-03 | 5.43E-04 | 1.04E-03 |
| 12h       | 2.14E-04 | 8.37E-04 | 1.30E-04 | 2.40E-04 |
| 24h       | 4.83E-04 | 3.58E-04 | 3.22E-04 | 6.94E-05 |
| 36h       | 1.04E-03 | 1.40E-03 | 1.24E-04 | 1.23E-05 |
| 48h       | 2.07E-03 | 2.87E-04 | 1.71E-04 | 7.46E-05 |
| 72h       | 7.24E-04 | 4.70E-04 | 1.26E-04 | 6.60E-05 |

|     |           |          |          |          |
|-----|-----------|----------|----------|----------|
|     | cgd8_2360 |          |          |          |
| 2h  | 8.40E-07  | 2.25E-06 | 1.19E-06 | 2.90E-06 |
| 6h  | 2.09E-06  | 3.63E-06 | 2.41E-05 | 2.69E-05 |
| 12h | 9.01E-08  | 2.45E-07 | 1.75E-06 | 1.21E-06 |
| 24h | 1.56E-06  | 2.30E-06 | 9.88E-06 | 5.11E-06 |
| 36h | 2.93E-06  | 4.16E-06 | 6.37E-06 | 1.44E-06 |
| 48h | 3.18E-06  | 6.60E-06 | 1.31E-05 | 7.47E-05 |
| 72h | 2.46E-05  | 1.57E-05 | 7.29E-05 | 1.12E-05 |
|     | cgd8_2370 |          |          |          |
| 2h  | 3.31E-07  | 8.57E-07 | 9.09E-08 | 9.11E-07 |
| 6h  | 4.73E-07  | 6.28E-07 | 6.35E-06 | 8.82E-06 |
| 12h | 9.41E-08  | 3.38E-07 | 2.40E-06 | 3.31E-06 |
| 24h | 3.13E-07  | 9.83E-07 | 6.49E-06 | 1.93E-06 |
| 36h | 8.23E-07  | 4.49E-06 | 2.71E-06 | 2.62E-07 |
| 48h | 7.18E-06  | 7.66E-06 | 1.09E-05 | 1.42E-05 |
| 72h | 6.55E-06  | 3.10E-06 | 3.13E-05 | 6.24E-06 |
|     | cgd8_2380 |          |          |          |
| 2h  | 0.00E+00  | 1.56E-08 | 0.00E+00 | 1.27E-08 |
| 6h  | 1.32E-07  | 5.45E-08 | 1.11E-07 | 1.64E-07 |
| 12h | 1.43E-08  | 1.53E-08 | 2.02E-08 | 9.87E-09 |
| 24h | 3.67E-08  | 8.00E-08 | 9.66E-08 | 5.67E-08 |
| 36h | 2.27E-07  | 2.56E-07 | 1.96E-07 | 1.10E-08 |
| 48h | 1.51E-07  | 2.91E-07 | 1.58E-07 | 1.17E-07 |
| 72h | 9.27E-08  | 1.74E-07 | 1.42E-07 | 5.52E-08 |
|     | cgd8_2390 |          |          |          |
| 2h  | 0.00E+00  | 0.00E+00 | 0.00E+00 | 0.00E+00 |
| 6h  | 0.00E+00  | 0.00E+00 | 0.00E+00 | 0.00E+00 |
| 12h | 6.17E-08  | 6.86E-07 | 4.80E-08 | 1.75E-07 |
| 24h | 4.40E-08  | 9.62E-08 | 3.36E-08 | 4.23E-08 |
| 36h | 4.74E-07  | 6.79E-07 | 4.04E-07 | 3.63E-08 |
| 48h | 8.19E-06  | 1.88E-07 | 7.79E-07 | 1.22E-05 |
| 72h | 2.76E-06  | 3.11E-07 | 1.17E-06 | 6.87E-06 |
|     | cgd8_2410 |          |          |          |
| 2h  | 6.76E-09  | 1.58E-08 | 0.00E+00 | 0.00E+00 |
| 6h  | 2.60E-07  | 4.69E-07 | 3.22E-07 | 3.38E-05 |
| 12h | 1.19E-07  | 9.66E-08 | 7.04E-07 | 4.22E-06 |
| 24h | 3.13E-07  | 1.94E-07 | 9.76E-07 | 8.62E-06 |
| 36h | 6.58E-07  | 4.29E-07 | 5.10E-07 | 3.10E-06 |
| 48h | 3.50E-07  | 2.03E-07 | 3.11E-07 | 1.44E-05 |
| 72h | 4.70E-08  | 1.98E-07 | 2.57E-07 | 2.03E-08 |
|     | cgd8_2420 |          |          |          |
| 2h  | 5.89E-07  | 1.85E-07 | 1.83E-07 | 8.25E-06 |
| 6h  | 2.34E-07  | 2.74E-07 | 4.59E-07 | 4.00E-05 |
| 12h | 3.68E-08  | 5.43E-08 | 4.71E-07 | 7.51E-06 |
| 24h | 2.11E-07  | 5.21E-07 | 6.37E-07 | 2.24E-06 |
| 36h | 3.34E-07  | 4.21E-07 | 3.48E-07 | 2.57E-06 |
| 48h | 1.75E-07  | 7.82E-08 | 6.24E-07 | 2.15E-07 |
| 72h | 8.67E-08  | 1.93E-07 | 2.71E-07 | 1.12E-06 |
|     | cgd8_2430 |          |          |          |
| 2h  | 6.43E-06  | 5.23E-07 | 2.44E-07 | 5.85E-04 |
| 6h  | 1.92E-06  | 6.13E-07 | 3.57E-06 | 1.11E-04 |
| 12h | 3.02E-07  | 1.10E-07 | 5.45E-06 | 3.42E-07 |
| 24h | 2.14E-06  | 5.20E-07 | 4.97E-06 | 1.17E-06 |

|     |           |          |          |          |
|-----|-----------|----------|----------|----------|
| 36h | 2.26E-06  | 1.11E-06 | 2.46E-06 | 8.90E-06 |
| 48h | 3.46E-06  | 8.15E-07 | 9.12E-06 | 2.99E-06 |
| 72h | 3.04E-06  | 9.79E-07 | 2.21E-06 | 3.36E-06 |
|     | cgd8_2450 |          |          |          |
| 2h  | 8.15E-06  | 2.13E-06 | 8.44E-07 | 5.01E-05 |
| 6h  | 4.13E-07  | 2.70E-07 | 1.12E-06 | 4.74E-07 |
| 12h | 8.90E-08  | 2.19E-07 | 1.67E-06 | 5.98E-08 |
| 24h | 4.33E-07  | 9.42E-07 | 1.23E-06 | 1.23E-07 |
| 36h | 7.31E-07  | 1.03E-06 | 7.49E-07 | 3.35E-07 |
| 48h | 7.58E-07  | 2.56E-07 | 7.23E-07 | 3.06E-07 |
| 72h | 4.35E-07  | 8.44E-07 | 8.08E-07 | 7.45E-07 |
|     | cgd8_2460 |          |          |          |
| 2h  | 2.41E-06  | 3.11E-07 | 1.20E-06 | 1.42E-05 |
| 6h  | 4.63E-07  | 2.24E-07 | 4.97E-06 | 7.87E-06 |
| 12h | 2.58E-07  | 1.02E-07 | 1.35E-06 | 1.03E-06 |
| 24h | 3.51E-07  | 4.94E-07 | 6.18E-06 | 1.41E-06 |
| 36h | 1.36E-06  | 1.06E-06 | 8.09E-07 | 2.32E-06 |
| 48h | 9.70E-07  | 9.75E-08 | 3.17E-07 | 1.04E-06 |
| 72h | 1.29E-07  | 9.89E-08 | 1.36E-07 | 2.18E-07 |
|     | cgd8_2470 |          |          |          |
| 2h  | 5.10E-07  | 3.06E-07 | 2.96E-07 | 1.14E-06 |
| 6h  | 2.36E-07  | 2.75E-08 | 3.84E-07 | 1.37E-07 |
| 12h | 2.90E-07  | 8.70E-08 | 8.73E-07 | 4.31E-08 |
| 24h | 1.62E-07  | 3.54E-07 | 1.75E-07 | 3.69E-08 |
| 36h | 4.81E-07  | 2.77E-07 | 6.31E-07 | 2.29E-07 |
| 48h | 3.08E-07  | 1.24E-07 | 2.46E-07 | 6.35E-08 |
| 72h | 2.03E-07  | 7.18E-08 | 2.26E-07 | 1.73E-07 |
|     | cgd8_2490 |          |          |          |
| 2h  | 2.82E-08  | 2.47E-08 | 3.55E-07 | 1.39E-06 |
| 6h  | 0.00E+00  | 0.00E+00 | 0.00E+00 | 0.00E+00 |
| 12h | 7.60E-05  | 2.28E-05 | 1.86E-04 | 6.45E-06 |
| 24h | 1.90E-05  | 5.41E-06 | 6.59E-06 | 4.50E-06 |
| 36h | 3.77E-06  | 2.33E-06 | 2.37E-05 | 1.61E-05 |
| 48h | 2.91E-06  | 3.52E-07 | 3.38E-06 | 4.18E-06 |
| 72h | 1.36E-07  | 2.63E-07 | 7.18E-07 | 3.35E-08 |
|     | cgd8_2500 |          |          |          |
| 2h  | 3.32E-06  | 2.65E-06 | 3.30E-06 | 8.60E-06 |
| 6h  | 9.97E-06  | 1.11E-06 | 1.99E-05 | 3.86E-06 |
| 12h | 3.52E-07  | 8.57E-07 | 4.02E-06 | 5.38E-07 |
| 24h | 3.63E-06  | 2.39E-06 | 7.16E-06 | 1.03E-06 |
| 36h | 1.23E-06  | 5.62E-06 | 3.19E-06 | 2.22E-06 |
| 48h | 1.84E-06  | 1.42E-06 | 2.12E-06 | 8.98E-07 |
| 72h | 4.12E-07  | 7.96E-07 | 1.10E-06 | 9.73E-08 |
|     | cgd8_2510 |          |          |          |
| 2h  | 3.01E-06  | 1.85E-06 | 2.81E-06 | 2.48E-05 |
| 6h  | 4.27E-06  | 3.92E-07 | 9.55E-06 | 1.21E-06 |
| 12h | 5.91E-08  | 4.55E-07 | 8.77E-07 | 1.20E-07 |
| 24h | 1.65E-06  | 3.06E-07 | 5.25E-06 | 6.64E-07 |
| 36h | 9.65E-07  | 1.44E-06 | 1.28E-06 | 3.40E-06 |
| 48h | 1.86E-06  | 7.16E-07 | 2.01E-06 | 9.70E-06 |
| 72h | 4.82E-07  | 2.10E-07 | 1.79E-06 | 1.49E-07 |
|     | cgd8_2520 |          |          |          |
| 2h  | 4.34E-05  | 2.41E-05 | 1.30E-05 | 1.97E-04 |

|     |           |          |          |          |
|-----|-----------|----------|----------|----------|
| 6h  | 6.10E-06  | 1.07E-06 | 7.39E-06 | 1.05E-05 |
| 12h | 5.03E-06  | 1.19E-06 | 2.40E-05 | 5.26E-06 |
| 24h | 2.74E-05  | 1.11E-05 | 1.15E-05 | 1.28E-05 |
| 36h | 5.92E-06  | 2.12E-06 | 8.18E-06 | 9.04E-06 |
| 48h | 6.25E-06  | 1.68E-06 | 4.73E-06 | 2.96E-05 |
| 72h | 3.90E-06  | 8.39E-07 | 6.07E-06 | 2.74E-06 |
|     | cgd8_2540 |          |          |          |
| 2h  | 0.00E+00  | 0.00E+00 | 0.00E+00 | 4.27E-06 |
| 6h  | 0.00E+00  | 3.97E-08 | 0.00E+00 | 0.00E+00 |
| 12h | 5.71E-04  | 1.53E-04 | 1.09E-03 | 8.97E-06 |
| 24h | 1.70E-04  | 4.18E-05 | 1.63E-04 | 1.14E-05 |
| 36h | 2.78E-04  | 3.66E-05 | 4.95E-04 | 8.83E-05 |
| 48h | 2.15E-04  | 8.86E-06 | 2.16E-04 | 1.30E-05 |
| 72h | 6.05E-05  | 1.19E-05 | 5.42E-05 | 9.13E-06 |
|     | cgd8_2550 |          |          |          |
| 2h  | 2.09E-07  | 3.50E-08 | 0.00E+00 | 0.00E+00 |
| 6h  | 1.71E-06  | 5.51E-07 | 1.07E-05 | 1.81E-05 |
| 12h | 7.93E-07  | 5.56E-06 | 1.56E-05 | 1.93E-06 |
| 24h | 2.69E-06  | 1.34E-06 | 1.19E-05 | 4.89E-06 |
| 36h | 1.36E-05  | 4.15E-06 | 2.85E-05 | 1.53E-05 |
| 48h | 1.10E-05  | 1.98E-06 | 1.49E-05 | 3.33E-05 |
| 72h | 3.28E-06  | 5.22E-07 | 4.99E-06 | 1.90E-06 |
|     | cgd8_2560 |          |          |          |
| 2h  | 4.94E-06  | 2.78E-06 | 1.54E-06 | 5.42E-06 |
| 6h  | 3.40E-06  | 3.92E-06 | 1.63E-04 | 9.91E-06 |
| 12h | 2.94E-07  | 1.03E-05 | 4.65E-05 | 1.11E-06 |
| 24h | 1.86E-06  | 2.51E-06 | 1.80E-05 | 3.03E-06 |
| 36h | 1.80E-06  | 1.19E-06 | 5.41E-06 | 6.73E-06 |
| 48h | 1.20E-06  | 6.40E-07 | 1.74E-06 | 4.75E-06 |
| 72h | 8.43E-08  | 3.26E-07 | 3.98E-07 | 1.64E-06 |
|     | cgd8_2580 |          |          |          |
| 2h  | 0.00E+00  | 7.02E-08 | 0.00E+00 | 0.00E+00 |
| 6h  | 0.00E+00  | 7.19E-08 | 9.79E-07 | 0.00E+00 |
| 12h | 4.58E-07  | 4.10E-06 | 2.60E-06 | 0.00E+00 |
| 24h | 6.11E-07  | 1.60E-06 | 3.83E-06 | 0.00E+00 |
| 36h | 1.25E-06  | 4.47E-06 | 3.16E-06 | 0.00E+00 |
| 48h | 1.50E-06  | 4.39E-06 | 2.72E-06 | 0.00E+00 |
| 72h | 4.85E-07  | 1.06E-06 | 1.26E-06 | 0.00E+00 |
|     | cgd8_2620 |          |          |          |
| 2h  | 0.00E+00  | 0.00E+00 | 0.00E+00 | 0.00E+00 |
| 6h  | 0.00E+00  | 3.36E-07 | 8.94E-08 | 3.26E-08 |
| 12h | 2.57E-09  | 2.67E-08 | 1.17E-08 | 1.08E-08 |
| 24h | 1.72E-08  | 5.33E-08 | 1.01E-07 | 8.27E-08 |
| 36h | 5.78E-08  | 2.54E-07 | 7.31E-08 | 1.45E-07 |
| 48h | 7.04E-08  | 9.04E-08 | 4.47E-08 | 2.16E-07 |
| 72h | 1.07E-08  | 1.41E-07 | 3.72E-08 | 3.82E-08 |
|     | cgd8_2630 |          |          |          |
| 2h  | 7.18E-06  | 1.44E-06 | 0.00E+00 | 1.18E-07 |
| 6h  | 3.62E-05  | 6.65E-05 | 7.64E-05 | 1.36E-05 |
| 12h | 5.96E-06  | 2.79E-06 | 1.70E-06 | 8.99E-07 |
| 24h | 1.81E-06  | 3.39E-04 | 3.14E-05 | 8.51E-06 |
| 36h | 3.33E-05  | 3.04E-05 | 1.21E-05 | 8.87E-06 |
| 48h | 6.19E-06  | 9.16E-06 | 7.12E-06 | 7.71E-06 |

|     |           |          |          |          |
|-----|-----------|----------|----------|----------|
| 72h | 7.81E-07  | 1.91E-06 | 6.96E-07 | 7.40E-07 |
|     | cgd8_2640 |          |          |          |
| 2h  | 0.00E+00  | 0.00E+00 | 0.00E+00 | 0.00E+00 |
| 6h  | 0.00E+00  | 0.00E+00 | 0.00E+00 | 0.00E+00 |
| 12h | 1.16E-07  | 1.70E-06 | 2.93E-07 | 4.52E-07 |
| 24h | 1.40E-07  | 2.00E-06 | 2.45E-06 | 2.34E-06 |
| 36h | 5.73E-06  | 7.01E-06 | 1.21E-06 | 2.33E-06 |
| 48h | 1.93E-06  | 1.71E-06 | 6.77E-07 | 5.10E-06 |
| 72h | 4.98E-07  | 1.22E-06 | 7.06E-07 | 7.88E-07 |
|     | cgd8_2650 |          |          |          |
| 2h  | 1.01E-06  | 5.81E-06 | 0.00E+00 | 0.00E+00 |
| 6h  | 2.20E-04  | 1.46E-03 | 9.66E-04 | 4.79E-04 |
| 12h | 1.87E-04  | 3.68E-04 | 3.10E-04 | 8.41E-05 |
| 24h | 9.10E-05  | 6.45E-04 | 6.26E-04 | 2.61E-04 |
| 36h | 4.05E-04  | 7.67E-04 | 3.03E-04 | 3.57E-04 |
| 48h | 1.18E-03  | 3.74E-04 | 1.29E-04 | 5.00E-04 |
| 72h | 9.07E-05  | 2.87E-04 | 5.36E-05 | 5.48E-05 |
|     | cgd8_2660 |          |          |          |
| 2h  | 4.47E-06  | 4.93E-06 | 1.27E-06 | 2.25E-06 |
| 6h  | 1.17E-06  | 2.97E-06 | 1.29E-06 | 9.59E-07 |
| 12h | 3.89E-06  | 8.07E-06 | 9.43E-06 | 2.46E-06 |
| 24h | 4.11E-06  | 5.87E-06 | 2.74E-06 | 1.26E-06 |
| 36h | 1.00E-06  | 3.20E-06 | 1.19E-06 | 1.53E-06 |
| 48h | 8.74E-07  | 6.79E-07 | 4.87E-07 | 1.02E-06 |
| 72h | 1.27E-07  | 7.78E-07 | 2.40E-07 | 4.36E-07 |
|     | cgd8_2670 |          |          |          |
| 2h  | 7.68E-07  | 5.08E-07 | 5.03E-08 | 1.32E-07 |
| 6h  | 1.37E-07  | 7.17E-08 | 4.90E-08 | 2.12E-07 |
| 12h | 4.70E-07  | 1.57E-06 | 9.54E-07 | 5.99E-07 |
| 24h | 6.40E-07  | 1.31E-06 | 4.84E-07 | 1.80E-07 |
| 36h | 4.92E-07  | 8.99E-07 | 2.22E-07 | 6.05E-07 |
| 48h | 1.18E-05  | 1.27E-05 | 2.43E-06 | 4.20E-06 |
| 72h | 1.24E-07  | 6.55E-07 | 1.02E-07 | 2.20E-07 |
|     | cgd8_2710 |          |          |          |
| 2h  | 1.37E-03  | 0.00E+00 | 0.00E+00 | 1.81E-04 |
| 6h  | 2.99E-07  | 2.65E-05 | 1.71E-05 | 0.00E+00 |
| 12h | 8.71E-06  | 7.51E-06 | 7.39E-05 | 2.98E-05 |
| 24h | 8.77E-06  | 1.42E-04 | 5.75E-05 | 1.35E-05 |
| 36h | 1.67E-05  | 7.20E-04 | 1.38E-04 | 7.99E-04 |
| 48h | 1.44E-05  | 5.82E-04 | 2.19E-04 | 1.02E-03 |
| 72h | 5.21E-05  | 6.26E-04 | 8.67E-05 | 2.61E-04 |
|     | cgd8_2720 |          |          |          |
| 2h  | 3.18E-05  | 3.74E-05 | 1.93E-06 | 5.45E-06 |
| 6h  | 1.26E-05  | 1.32E-04 | 6.95E-05 | 6.69E-05 |
| 12h | 5.68E-06  | 1.76E-06 | 1.23E-05 | 1.21E-05 |
| 24h | 8.95E-06  | 3.96E-05 | 7.05E-05 | 3.61E-05 |
| 36h | 1.23E-05  | 3.11E-05 | 1.02E-05 | 1.54E-05 |
| 48h | 2.42E-05  | 1.59E-05 | 7.24E-06 | 2.17E-05 |
| 72h | 9.13E-06  | 1.40E-05 | 2.38E-06 | 1.07E-05 |
|     | cgd8_2750 |          |          |          |
| 2h  | 0.00E+00  | 0.00E+00 | 0.00E+00 | 0.00E+00 |
| 6h  | 0.00E+00  | 0.00E+00 | 0.00E+00 | 0.00E+00 |
| 12h | 1.76E-04  | 4.29E-04 | 1.17E-04 | 1.48E-04 |

|           |          |          |          |          |
|-----------|----------|----------|----------|----------|
| 24h       | 1.50E-05 | 7.46E-05 | 1.91E-05 | 1.52E-05 |
| 36h       | 1.50E-04 | 1.42E-04 | 1.68E-04 | 4.65E-04 |
| 48h       | 2.65E-04 | 2.07E-04 | 1.68E-04 | 6.62E-04 |
| 72h       | 7.79E-05 | 1.83E-04 | 8.02E-05 | 5.51E-05 |
| cgd8_2760 |          |          |          |          |
| 2h        | 0.00E+00 | 0.00E+00 | 0.00E+00 | 0.00E+00 |
| 6h        | 1.62E-04 | 7.47E-05 | 1.66E-04 | 4.65E-05 |
| 12h       | 1.39E-04 | 5.42E-04 | 6.53E-05 | 4.17E-04 |
| 24h       | 1.32E-04 | 5.91E-04 | 6.67E-04 | 3.81E-04 |
| 36h       | 8.74E-05 | 1.81E-03 | 4.71E-04 | 1.27E-03 |
| 48h       | 2.81E-04 | 9.91E-04 | 5.27E-04 | 1.82E-04 |
| 72h       | 9.04E-05 | 1.33E-03 | 6.27E-04 | 3.03E-03 |
| cgd8_2780 |          |          |          |          |
| 2h        | 0.00E+00 | 0.00E+00 | 0.00E+00 | 0.00E+00 |
| 6h        | 1.01E-06 | 1.55E-06 | 6.70E-06 | 1.10E-01 |
| 12h       | 2.07E-07 | 3.75E-07 | 4.91E-06 | 1.28E-03 |
| 24h       | 3.08E-07 | 1.17E-06 | 2.23E-06 | 2.38E-04 |
| 36h       | 4.50E-07 | 8.13E-07 | 1.17E-06 | 7.55E-05 |
| 48h       | 3.78E-07 | 2.06E-07 | 3.39E-07 | 2.48E-04 |
| 72h       | 4.35E-08 | 8.29E-08 | 1.85E-07 | 8.47E-07 |
| cgd8_2790 |          |          |          |          |
| 2h        | 8.00E-09 | 0.00E+00 | 0.00E+00 | 7.25E-08 |
| 6h        | 0.00E+00 | 2.59E-08 | 5.69E-09 | 1.48E-07 |
| 12h       | 3.46E-05 | 6.96E-05 | 3.02E-05 | 7.55E-05 |
| 24h       | 5.67E-06 | 7.75E-06 | 4.74E-06 | 7.32E-06 |
| 36h       | 1.02E-06 | 2.94E-06 | 7.32E-06 | 1.10E-05 |
| 48h       | 2.10E-06 | 1.40E-06 | 2.80E-06 | 7.25E-05 |
| 72h       | 2.20E-07 | 1.08E-06 | 6.68E-07 | 2.33E-06 |
| cgd8_2800 |          |          |          |          |
| 2h        | 7.27E-09 | 1.15E-09 | 0.00E+00 | 0.00E+00 |
| 6h        | 2.63E-08 | 9.79E-09 | 1.79E-08 | 3.62E-08 |
| 12h       | 1.80E-08 | 1.22E-09 | 3.74E-09 | 1.37E-08 |
| 24h       | 9.01E-09 | 8.74E-09 | 1.09E-08 | 1.89E-08 |
| 36h       | 7.18E-09 | 4.74E-08 | 2.47E-08 | 2.14E-08 |
| 48h       | 7.56E-07 | 1.97E-07 | 1.72E-07 | 2.12E-06 |
| 72h       | 1.64E-07 | 2.07E-07 | 5.48E-07 | 2.71E-07 |
| cgd8_2810 |          |          |          |          |
| 2h        | 4.98E-06 | 1.42E-05 | 3.58E-06 | 1.77E-03 |
| 6h        | 3.55E-05 | 1.08E-04 | 1.32E-04 | 1.10E-03 |
| 12h       | 4.38E-07 | 2.59E-06 | 1.28E-05 | 1.39E-04 |
| 24h       | 5.53E-06 | 5.55E-05 | 8.57E-05 | 4.89E-04 |
| 36h       | 1.38E-06 | 3.13E-05 | 2.25E-05 | 2.53E-04 |
| 48h       | 9.73E-06 | 2.57E-05 | 7.38E-05 | 6.66E-02 |
| 72h       | 1.03E-06 | 1.35E-05 | 2.98E-05 | 7.98E-04 |
| cgd8_2820 |          |          |          |          |
| 2h        | 1.09E-07 | 1.07E-07 | 0.00E+00 | 2.11E-07 |
| 6h        | 3.48E-07 | 7.00E-07 | 5.65E-07 | 7.25E-07 |
| 12h       | 7.45E-08 | 6.16E-08 | 5.82E-07 | 1.18E-07 |
| 24h       | 9.19E-08 | 2.31E-07 | 5.15E-07 | 4.23E-07 |
| 36h       | 3.08E-07 | 2.75E-07 | 7.06E-07 | 4.44E-07 |
| 48h       | 1.09E-07 | 1.17E-07 | 1.13E-07 | 2.28E-06 |
| 72h       | 3.43E-08 | 9.26E-08 | 1.14E-07 | 3.10E-07 |
| cgd8_2830 |          |          |          |          |

|     |           |          |          |          |
|-----|-----------|----------|----------|----------|
| 2h  | 2.03E-07  | 7.48E-07 | 3.50E-07 | 1.41E-04 |
| 6h  | 9.26E-06  | 5.97E-05 | 1.53E-04 | 2.41E-03 |
| 12h | 5.30E-07  | 1.84E-06 | 1.42E-05 | 9.08E-04 |
| 24h | 1.30E-06  | 3.25E-05 | 3.99E-04 | 7.60E-04 |
| 36h | 5.26E-06  | 5.45E-05 | 2.50E-05 | 8.34E-03 |
| 48h | 6.32E-06  | 2.49E-05 | 4.33E-05 | 2.76E-01 |
| 72h | 1.38E-06  | 1.94E-05 | 1.58E-05 | 3.01E-05 |
|     | cgd8_2840 |          |          |          |
| 2h  | 0.00E+00  | 0.00E+00 | 0.00E+00 | 0.00E+00 |
| 6h  | 4.61E-08  | 1.83E-07 | 1.17E-07 | 7.64E-06 |
| 12h | 2.18E-06  | 1.87E-05 | 3.77E-06 | 9.58E-05 |
| 24h | 2.95E-07  | 3.62E-06 | 2.50E-06 | 2.45E-06 |
| 36h | 7.73E-07  | 1.05E-05 | 5.77E-06 | 4.12E-05 |
| 48h | 9.89E-07  | 2.45E-06 | 3.90E-06 | 7.34E-03 |
| 72h | 4.10E-07  | 2.14E-06 | 1.02E-06 | 1.46E-06 |
|     | cgd8_2850 |          |          |          |
| 2h  | 5.85E-09  | 1.46E-08 | 3.29E-08 | 1.21E-08 |
| 6h  | 1.40E-08  | 5.90E-09 | 2.47E-08 | 0.00E+00 |
| 12h | 1.89E-09  | 1.85E-08 | 2.72E-08 | 3.06E-08 |
| 24h | 1.95E-08  | 3.01E-08 | 1.10E-07 | 2.94E-08 |
| 36h | 3.69E-08  | 1.66E-07 | 1.22E-07 | 2.60E-07 |
| 48h | 3.80E-08  | 4.86E-08 | 1.01E-07 | 2.82E-06 |
| 72h | 2.65E-08  | 3.88E-08 | 3.05E-08 | 8.36E-09 |
|     | cgd8_2860 |          |          |          |
| 2h  | 3.92E-06  | 3.19E-06 | 1.75E-06 | 5.01E-06 |
| 6h  | 9.19E-06  | 5.47E-06 | 2.84E-05 | 6.34E-06 |
| 12h | 5.25E-07  | 2.13E-06 | 6.10E-06 | 4.39E-06 |
| 24h | 2.22E-06  | 4.20E-06 | 1.33E-05 | 4.40E-06 |
| 36h | 1.24E-06  | 4.32E-06 | 2.76E-06 | 3.49E-06 |
| 48h | 1.35E-06  | 1.49E-06 | 1.88E-06 | 7.90E-06 |
| 72h | 5.94E-07  | 4.45E-07 | 5.26E-07 | 4.65E-06 |
|     | cgd8_2870 |          |          |          |
| 2h  | 1.07E-04  | 6.82E-05 | 1.40E-04 | 7.44E-05 |
| 6h  | 4.66E-04  | 1.23E-04 | 4.88E-04 | 1.16E-03 |
| 12h | 3.51E-05  | 6.45E-05 | 2.56E-04 | 5.71E-05 |
| 24h | 1.28E-04  | 9.99E-05 | 1.82E-04 | 3.98E-05 |
| 36h | 3.97E-05  | 6.97E-05 | 3.62E-05 | 4.79E-05 |
| 48h | 2.24E-05  | 2.29E-05 | 3.85E-05 | 3.24E-04 |
| 72h | 1.67E-05  | 1.01E-05 | 9.04E-06 | 1.52E-05 |
|     | cgd8_2890 |          |          |          |
| 2h  | 5.70E-04  | 3.20E-04 | 4.72E-03 | 1.11E-01 |
| 6h  | 1.01E-03  | 1.12E-03 | 2.38E-02 | 6.77E-01 |
| 12h | 2.24E-04  | 1.26E-03 | 4.04E-03 | 1.26E-01 |
| 24h | 1.19E-04  | 2.22E-03 | 3.48E-03 | 1.12E-02 |
| 36h | 4.46E-04  | 5.26E-04 | 4.06E-04 | 1.45E-02 |
| 48h | 2.35E-04  | 1.69E-04 | 3.65E-03 | 6.99E-01 |
| 72h | 5.46E-05  | 2.62E-04 | 3.16E-04 | 3.36E-04 |
|     | cgd8_2910 |          |          |          |
| 2h  | 2.91E-06  | 4.13E-08 | 0.00E+00 | 9.01E-08 |
| 6h  | 1.55E-07  | 1.24E-07 | 4.39E-07 | 3.16E-06 |
| 12h | 1.16E-07  | 3.45E-07 | 3.70E-07 | 5.70E-07 |
| 24h | 1.08E-07  | 2.21E-07 | 1.32E-06 | 1.12E-06 |
| 36h | 8.48E-07  | 1.56E-06 | 1.02E-06 | 2.16E-06 |



|     |           |          |          |          |
|-----|-----------|----------|----------|----------|
| 48h | 4.00E-07  | 4.46E-07 | 5.02E-07 | 6.20E-05 |
| 72h | 2.98E-07  | 2.90E-07 | 4.23E-07 | 7.56E-07 |
|     | cgd8_2940 |          |          |          |
| 2h  | 8.90E-07  | 1.63E-05 | 4.03E-07 | 8.26E-05 |
| 6h  | 2.05E-04  | 5.31E-05 | 5.94E-05 | 2.35E-04 |
| 12h | 1.69E-05  | 2.49E-06 | 2.78E-05 | 5.22E-05 |
| 24h | 1.70E-05  | 6.44E-06 | 4.27E-05 | 2.50E-04 |
| 36h | 1.39E-05  | 1.87E-05 | 2.07E-08 | 5.29E-05 |
| 48h | 4.47E-05  | 7.56E-06 | 1.49E-05 | 1.35E-04 |
| 72h | 9.15E-07  | 2.07E-06 | 1.94E-06 | 4.45E-05 |
|     | cgd8_2950 |          |          |          |
| 2h  | 9.38E-04  | 7.68E-04 | 5.06E-04 | 1.92E-05 |
| 6h  | 9.67E-04  | 2.34E-03 | 1.05E-03 | 9.36E-05 |
| 12h | 4.38E-04  | 0.00E+00 | 1.02E-03 | 1.60E-04 |
| 24h | 6.87E-04  | 1.19E-03 | 5.17E-03 | 3.62E-05 |
| 36h | 3.29E-04  | 2.45E-03 | 1.16E-06 | 1.77E-04 |
| 48h | 3.88E-04  | 4.36E-03 | 5.88E-03 | 4.39E-05 |
| 72h | 6.37E-04  | 2.91E-03 | 2.92E-03 | 8.01E-06 |
|     | cgd8_2960 |          |          |          |
| 2h  | 1.95E-03  | 4.44E-04 | 2.64E-05 | 4.72E-05 |
| 6h  | 4.42E-04  | 5.27E-04 | 2.64E-04 | 9.99E-05 |
| 12h | 4.95E-05  | 1.45E-05 | 1.96E-04 | 6.65E-05 |
| 24h | 1.97E-04  | 8.67E-04 | 5.21E-04 | 4.59E-04 |
| 36h | 1.40E-04  | 2.13E-04 | 3.49E-07 | 1.63E-04 |
| 48h | 3.02E-04  | 1.61E-04 | 1.95E-04 | 5.39E-05 |
| 72h | 1.24E-05  | 2.79E-05 | 2.83E-05 | 8.00E-05 |
|     | cgd8_2970 |          |          |          |
| 2h  | 0.00E+00  | 6.40E-07 | 4.76E-07 | 1.41E-06 |
| 6h  | 5.89E-06  | 1.90E-06 | 2.58E-06 | 3.35E-06 |
| 12h | 4.50E-07  | 1.75E-07 | 7.78E-07 | 1.66E-06 |
| 24h | 4.37E-07  | 1.96E-06 | 1.65E-06 | 2.14E-06 |
| 36h | 1.55E-06  | 1.07E-06 | 1.69E-09 | 6.67E-07 |
| 48h | 1.22E-06  | 5.65E-07 | 3.72E-07 | 6.74E-07 |
| 72h | 1.58E-07  | 1.73E-07 | 1.04E-07 | 1.85E-07 |
|     | cgd8_2980 |          |          |          |
| 2h  | 3.14E-05  | 7.33E-05 | 1.03E-05 | 1.72E-04 |
| 6h  | 2.09E-04  | 3.69E-04 | 1.84E-04 | 7.04E-04 |
| 12h | 2.41E-05  | 3.94E-05 | 5.97E-05 | 2.16E-04 |
| 24h | 1.52E-04  | 1.86E-04 | 1.65E-04 | 3.65E-04 |
| 36h | 6.09E-05  | 8.72E-05 | 1.04E-07 | 1.85E-03 |
| 48h | 2.88E-04  | 5.15E-05 | 7.03E-05 | 5.96E-05 |
| 72h | 1.18E-04  | 8.10E-06 | 1.42E-05 | 2.05E-04 |
|     | cgd8_2990 |          |          |          |
| 2h  | 7.08E-07  | 2.03E-07 | 7.60E-08 | 1.50E-06 |
| 6h  | 4.38E-07  | 4.25E-07 | 4.41E-07 | 2.24E-05 |
| 12h | 2.12E-07  | 2.74E-07 | 2.19E-07 | 3.97E-06 |
| 24h | 4.06E-07  | 5.31E-07 | 7.77E-07 | 1.31E-05 |
| 36h | 1.04E-06  | 1.54E-06 | 1.11E-09 | 7.02E-06 |
| 48h | 3.82E-06  | 9.44E-07 | 3.99E-07 | 1.75E-05 |
| 72h | 1.57E-07  | 2.92E-07 | 4.24E-07 | 5.48E-06 |
|     | cgd8_3000 |          |          |          |
| 2h  | 3.93E-05  | 4.18E-05 | 2.09E-05 | 9.70E-04 |
| 6h  | 3.38E-05  | 7.65E-05 | 2.92E-05 | 3.23E-03 |

|     |           |          |          |          |
|-----|-----------|----------|----------|----------|
| 12h | 1.37E-05  | 1.34E-05 | 3.66E-05 | 1.52E-03 |
| 24h | 9.70E-05  | 8.87E-05 | 7.31E-05 | 4.85E-04 |
| 36h | 2.93E-05  | 7.66E-05 | 3.26E-08 | 5.40E-04 |
| 48h | 4.70E-05  | 2.59E-05 | 2.97E-05 | 6.91E-04 |
| 72h | 3.16E-06  | 8.95E-06 | 6.11E-06 | 3.45E-04 |
|     | cgd8_3020 |          |          |          |
| 2h  | 4.78E-09  | 1.37E-08 | 0.00E+00 | 6.26E-08 |
| 6h  | 3.64E-08  | 3.72E-09 | 2.70E-09 | 4.59E-07 |
| 12h | 2.48E-06  | 3.59E-06 | 1.21E-06 | 9.81E-06 |
| 24h | 5.01E-07  | 6.93E-07 | 1.05E-06 | 2.92E-06 |
| 36h | 1.97E-06  | 1.66E-06 | 3.66E-09 | 1.19E-05 |
| 48h | 1.12E-06  | 6.30E-07 | 5.36E-07 | 6.76E-06 |
| 72h | 2.88E-08  | 5.79E-08 | 8.67E-08 | 7.33E-07 |
|     | cgd8_3030 |          |          |          |
| 2h  | 8.84E-07  | 0.00E+00 | 0.00E+00 | 0.00E+00 |
| 6h  | 0.00E+00  | 0.00E+00 | 0.00E+00 | 3.17E-06 |
| 12h | 1.59E-04  | 1.11E-04 | 7.57E-05 | 8.88E-05 |
| 24h | 4.20E-05  | 5.20E-05 | 4.01E-05 | 1.48E-05 |
| 36h | 4.17E-05  | 9.70E-05 | 2.08E-07 | 5.00E-05 |
| 48h | 8.68E-05  | 2.17E-05 | 4.14E-05 | 5.98E-06 |
| 72h | 3.59E-06  | 6.98E-06 | 1.05E-05 | 2.41E-05 |
|     | cgd8_3040 |          |          |          |
| 2h  | 3.33E-07  | 4.34E-08 | 0.00E+00 | 8.47E-06 |
| 6h  | 3.24E-07  | 6.70E-08 | 9.12E-08 | 2.15E-05 |
| 12h | 4.56E-06  | 5.57E-06 | 2.33E-06 | 1.72E-04 |
| 24h | 4.08E-06  | 1.94E-06 | 3.42E-06 | 6.74E-05 |
| 36h | 8.37E-07  | 1.53E-06 | 4.50E-09 | 5.07E-05 |
| 48h | 1.14E-06  | 4.44E-07 | 7.57E-07 | 3.20E-05 |
| 72h | 7.80E-08  | 2.04E-07 | 2.42E-07 | 1.45E-05 |
|     | cgd8_3050 |          |          |          |
| 2h  | 1.04E-03  | 7.18E-04 | 1.45E-03 | 9.18E-05 |
| 6h  | 1.38E-03  | 7.90E-04 | 4.71E-03 | 2.52E-04 |
| 12h | 7.40E-04  | 4.46E-04 | 9.64E-04 | 2.77E-03 |
| 24h | 1.01E-03  | 1.63E-03 | 2.16E-03 | 5.63E-04 |
| 36h | 5.09E-04  | 1.30E-03 | 1.15E-06 | 2.92E-04 |
| 48h | 9.38E-04  | 4.03E-04 | 4.56E-04 | 2.30E-04 |
| 72h | 2.44E-05  | 1.36E-04 | 2.29E-04 | 6.28E-05 |
|     | cgd8_3060 |          |          |          |
| 2h  | 1.02E-05  | 1.40E-05 | 2.77E-06 | 4.26E-05 |
| 6h  | 5.78E-05  | 4.34E-05 | 1.54E-04 | 1.54E-04 |
| 12h | 3.89E-05  | 3.56E-06 | 1.83E-05 | 7.92E-05 |
| 24h | 2.99E-05  | 1.91E-05 | 2.29E-04 | 1.83E-04 |
| 36h | 6.06E-05  | 9.39E-05 | 2.24E-07 | 7.03E-05 |
| 48h | 8.33E-05  | 2.87E-05 | 3.72E-05 | 3.76E-05 |
| 72h | 5.31E-06  | 1.05E-05 | 2.72E-05 | 1.05E-04 |
|     | cgd7_2380 |          |          |          |
| 2h  | 6.70E-06  | 9.29E-07 | 5.04E-06 | 3.72E-06 |
| 6h  | 6.12E-06  | 6.51E-06 | 3.58E-06 | 1.72E-05 |
| 12h | 1.31E-06  | 8.76E-07 | 1.68E-06 | 1.35E-06 |
| 24h | 6.05E-06  | 3.83E-06 | 4.09E-06 | 5.20E-06 |
| 36h | 2.62E-06  | 3.25E-06 | 2.93E-06 | 2.48E-06 |
| 48h | 1.33E-06  | 9.22E-07 | 2.26E-06 | 4.20E-06 |
| 72h | 6.86E-07  | 8.27E-08 | 9.01E-07 | 1.26E-06 |

|     |           |          |          |          |
|-----|-----------|----------|----------|----------|
|     | cgd7_2400 |          |          |          |
| 2h  | 1.77E-04  | 1.77E-04 | 2.58E-04 | 8.33E-05 |
| 6h  | 9.11E-05  | 1.20E-04 | 1.24E-04 | 2.23E-05 |
| 12h | 3.18E-03  | 6.96E-03 | 9.46E-04 | 4.22E-04 |
| 24h | 7.90E-05  | 7.26E-04 | 4.85E-04 | 1.92E-04 |
| 36h | 3.76E-04  | 2.93E-04 | 5.60E-04 | 1.84E-04 |
| 48h | 2.62E-04  | 1.65E-04 | 4.89E-04 | 1.54E-04 |
| 72h | 2.59E-04  | 6.01E-05 | 2.48E-04 | 2.25E-04 |
|     | cgd7_2410 |          |          |          |
| 2h  | 1.26E-04  | 1.39E-05 | 6.92E-06 | 2.84E-05 |
| 6h  | 1.50E-05  | 2.48E-05 | 1.42E-06 | 2.16E-06 |
| 12h | 1.12E-03  | 6.46E-04 | 6.02E-04 | 2.31E-04 |
| 24h | 3.83E-04  | 1.91E-04 | 1.22E-04 | 1.24E-04 |
| 36h | 2.11E-04  | 1.06E-04 | 1.38E-04 | 1.02E-04 |
| 48h | 1.08E-04  | 4.15E-05 | 6.02E-05 | 4.67E-05 |
| 72h | 7.26E-05  | 1.32E-05 | 2.81E-05 | 1.96E-05 |
|     | cgd7_2430 |          |          |          |
| 2h  | 9.87E-06  | 4.23E-06 | 1.16E-05 | 1.77E-05 |
| 6h  | 1.37E-05  | 2.09E-05 | 8.75E-06 | 1.70E-05 |
| 12h | 7.23E-06  | 9.96E-06 | 1.41E-05 | 6.90E-06 |
| 24h | 9.50E-06  | 1.23E-05 | 9.64E-06 | 1.61E-05 |
| 36h | 1.42E-05  | 1.44E-05 | 1.13E-05 | 5.35E-06 |
| 48h | 1.88E-06  | 2.10E-06 | 2.65E-06 | 5.82E-06 |
| 72h | 1.98E-06  | 8.10E-07 | 3.40E-06 | 2.29E-06 |
|     | cgd7_2440 |          |          |          |
| 2h  | 1.58E-06  | 5.85E-07 | 7.99E-07 | 9.14E-07 |
| 6h  | 2.80E-06  | 4.32E-06 | 3.48E-06 | 3.94E-06 |
| 12h | 3.56E-07  | 2.41E-07 | 1.81E-06 | 9.70E-07 |
| 24h | 9.89E-07  | 1.41E-06 | 2.39E-06 | 2.61E-06 |
| 36h | 4.88E-07  | 1.22E-06 | 1.34E-06 | 8.58E-07 |
| 48h | 6.25E-07  | 4.21E-07 | 9.17E-07 | 6.97E-07 |
| 72h | 2.10E-07  | 1.62E-07 | 3.82E-07 | 2.89E-07 |
|     | cgd7_2450 |          |          |          |
| 2h  | 1.22E-07  | 1.18E-08 | 2.34E-08 | 6.60E-08 |
| 6h  | 1.08E-07  | 5.74E-08 | 2.65E-07 | 1.30E-07 |
| 12h | 4.27E-08  | 7.82E-09 | 1.02E-07 | 2.24E-08 |
| 24h | 7.67E-08  | 9.22E-08 | 1.56E-07 | 2.86E-07 |
| 36h | 1.98E-07  | 1.30E-07 | 1.18E-07 | 1.64E-07 |
| 48h | 1.29E-07  | 8.93E-08 | 2.34E-07 | 3.38E-07 |
| 72h | 1.13E-07  | 5.52E-08 | 1.27E-07 | 1.32E-07 |
|     | cgd7_2460 |          |          |          |
| 2h  | 6.79E-09  | 2.40E-08 | 1.13E-08 | 4.93E-08 |
| 6h  | 1.64E-07  | 1.77E-07 | 1.78E-07 | 1.33E-07 |
| 12h | 5.18E-09  | 6.14E-08 | 2.04E-08 | 3.37E-08 |
| 24h | 9.80E-08  | 1.02E-07 | 1.80E-07 | 1.12E-07 |
| 36h | 1.45E-07  | 3.63E-07 | 2.40E-07 | 1.45E-07 |
| 48h | 3.32E-07  | 1.25E-07 | 2.95E-07 | 1.60E-07 |
| 72h | 2.16E-07  | 1.34E-07 | 3.67E-07 | 1.60E-07 |
|     | cgd7_2470 |          |          |          |
| 2h  | 1.35E-07  | 1.45E-08 | 4.43E-08 | 7.20E-08 |
| 6h  | 6.46E-08  | 1.24E-07 | 1.57E-07 | 1.88E-07 |
| 12h | 9.33E-10  | 2.69E-08 | 9.60E-08 | 3.81E-08 |
| 24h | 5.55E-08  | 5.62E-08 | 1.39E-07 | 2.38E-07 |

|     |           |          |          |          |
|-----|-----------|----------|----------|----------|
| 36h | 3.80E-07  | 8.16E-07 | 5.47E-07 | 6.43E-07 |
| 48h | 4.30E-06  | 3.11E-06 | 4.32E-06 | 2.99E-06 |
| 72h | 3.08E-07  | 2.53E-07 | 5.79E-07 | 4.28E-07 |
|     | cgd7_2480 |          |          |          |
| 2h  | 2.54E-07  | 5.20E-08 | 1.71E-08 | 5.59E-08 |
| 6h  | 2.03E-07  | 1.22E-07 | 4.47E-07 | 3.64E-07 |
| 12h | 6.07E-08  | 1.33E-07 | 2.08E-07 | 1.20E-07 |
| 24h | 2.51E-07  | 1.57E-07 | 5.35E-07 | 4.13E-07 |
| 36h | 6.63E-07  | 8.43E-07 | 1.44E-06 | 4.01E-07 |
| 48h | 4.57E-07  | 6.38E-07 | 5.58E-07 | 8.06E-07 |
| 72h | 1.75E-07  | 1.44E-07 | 2.91E-07 | 1.21E-07 |
|     | cgd7_2490 |          |          |          |
| 2h  | 3.43E-06  | 4.38E-08 | 0.00E+00 | 8.25E-08 |
| 6h  | 1.50E-07  | 9.29E-08 | 2.61E-06 | 3.01E-06 |
| 12h | 1.54E-07  | 0.00E+00 | 2.31E-07 | 9.86E-08 |
| 24h | 7.12E-07  | 9.24E-07 | 2.85E-06 | 1.26E-06 |
| 36h | 7.57E-06  | 7.44E-06 | 4.22E-06 | 1.49E-06 |
| 48h | 6.95E-05  | 6.71E-05 | 4.39E-05 | 2.04E-05 |
| 72h | 1.51E-05  | 6.72E-06 | 1.25E-05 | 5.91E-06 |
|     | cgd7_2500 |          |          |          |
| 2h  | 2.87E-06  | 1.30E-07 | 2.93E-07 | 4.44E-07 |
| 6h  | 2.01E-07  | 1.12E-06 | 6.15E-07 | 1.97E-06 |
| 12h | 9.33E-08  | 1.24E-07 | 3.45E-07 | 1.85E-07 |
| 24h | 1.08E-06  | 8.19E-07 | 1.05E-06 | 9.82E-07 |
| 36h | 5.02E-06  | 3.33E-06 | 1.68E-06 | 1.29E-06 |
| 48h | 6.77E-06  | 3.77E-06 | 5.81E-06 | 1.81E-06 |
| 72h | 3.79E-06  | 1.57E-06 | 3.49E-06 | 1.24E-06 |
|     | cgd7_2510 |          |          |          |
| 2h  | 3.13E-08  | 1.98E-07 | 0.00E+00 | 3.54E-08 |
| 6h  | 2.07E-07  | 3.90E-07 | 6.64E-07 | 1.08E-06 |
| 12h | 4.54E-08  | 4.89E-08 | 1.66E-07 | 4.84E-08 |
| 24h | 1.79E-07  | 1.40E-07 | 8.20E-07 | 1.71E-06 |
| 36h | 3.01E-06  | 9.19E-07 | 7.75E-07 | 4.32E-07 |
| 48h | 7.47E-07  | 6.09E-07 | 1.09E-06 | 3.84E-07 |
| 72h | 3.17E-07  | 2.54E-07 | 4.39E-07 | 4.83E-07 |
|     | cgd8_3070 |          |          |          |
| 2h  | 4.55E-06  | 3.27E-06 | 6.94E-07 | 4.38E-05 |
| 6h  | 1.25E-05  | 1.60E-05 | 4.63E-05 | 0.00E+00 |
| 12h | 1.09E-05  | 4.73E-05 | 2.89E-07 | 2.80E-04 |
| 24h | 9.76E-07  | 1.87E-05 | 3.69E-05 | 8.82E-05 |
| 36h | 1.26E-04  | 1.59E-05 | 5.73E-05 | 4.85E-04 |
| 48h | 2.76E-05  | 7.36E-06 | 1.97E-05 | 1.44E-04 |
| 72h | 3.94E-06  | 3.92E-06 | 5.52E-06 | 5.69E-05 |
|     | cgd8_3080 |          |          |          |
| 2h  | 2.42E-04  | 7.65E-05 | 1.79E-03 | 5.25E-04 |
| 6h  | 6.27E-05  | 6.63E-05 | 2.75E-04 | 1.09E-03 |
| 12h | 4.19E-05  | 7.11E-05 | 6.76E-08 | 7.74E-04 |
| 24h | 9.84E-06  | 2.20E-04 | 1.51E-04 | 5.02E-04 |
| 36h | 8.15E-05  | 4.10E-05 | 4.39E-05 | 5.17E-04 |
| 48h | 6.99E-05  | 1.80E-05 | 5.05E-05 | 2.01E-04 |
| 72h | 1.33E-05  | 9.57E-06 | 1.23E-05 | 1.57E-04 |
|     | cgd8_3090 |          |          |          |
| 2h  | 8.88E-07  | 4.29E-07 | 1.85E-06 | 2.44E-06 |

|     |           |          |          |          |
|-----|-----------|----------|----------|----------|
| 6h  | 2.31E-07  | 5.45E-07 | 6.81E-07 | 1.40E-06 |
| 12h | 2.32E-07  | 7.18E-07 | 5.83E-10 | 7.94E-07 |
| 24h | 3.19E-08  | 6.52E-07 | 1.86E-06 | 4.72E-07 |
| 36h | 7.90E-07  | 5.40E-07 | 4.13E-07 | 2.83E-07 |
| 48h | 4.63E-07  | 2.32E-07 | 2.95E-07 | 6.39E-07 |
| 72h | 6.99E-08  | 1.60E-07 | 2.73E-07 | 2.38E-07 |
|     | cgd8_3100 |          |          |          |
| 2h  | 2.46E-06  | 7.29E-07 | 2.24E-06 | 0.00E+00 |
| 6h  | 4.13E-06  | 1.16E-05 | 1.08E-05 | 1.72E-04 |
| 12h | 4.99E-07  | 7.10E-08 | 3.39E-09 | 8.14E-05 |
| 24h | 2.25E-07  | 4.93E-06 | 1.57E-05 | 1.71E-05 |
| 36h | 3.39E-06  | 4.85E-06 | 1.45E-06 | 2.15E-06 |
| 48h | 2.57E-06  | 4.21E-07 | 1.24E-06 | 4.85E-06 |
| 72h | 1.37E-07  | 1.81E-07 | 3.87E-07 | 0.00E+00 |
|     | cgd8_3110 |          |          |          |
| 2h  | 1.91E-05  | 8.99E-06 | 2.39E-05 | 2.23E-04 |
| 6h  | 2.12E-06  | 4.35E-06 | 4.14E-06 | 2.00E-05 |
| 12h | 9.46E-06  | 5.76E-06 | 2.74E-08 | 1.39E-05 |
| 24h | 8.84E-07  | 1.80E-05 | 1.16E-05 | 1.60E-05 |
| 36h | 1.47E-05  | 7.34E-06 | 8.49E-06 | 4.33E-06 |
| 48h | 3.15E-06  | 7.52E-07 | 1.16E-06 | 8.97E-06 |
| 72h | 1.14E-06  | 1.51E-06 | 3.73E-06 | 2.45E-06 |
|     | cgd8_3120 |          |          |          |
| 2h  | 3.65E-08  | 5.35E-09 | 1.95E-08 | 1.57E-06 |
| 6h  | 9.10E-09  | 0.00E+00 | 0.00E+00 | 6.41E-07 |
| 12h | 3.32E-05  | 8.95E-06 | 4.59E-09 | 1.64E-05 |
| 24h | 3.53E-08  | 8.46E-07 | 1.91E-07 | 3.14E-06 |
| 36h | 9.32E-07  | 3.48E-07 | 1.90E-06 | 4.56E-06 |
| 48h | 1.53E-07  | 1.16E-07 | 9.93E-08 | 8.25E-07 |
| 72h | 9.18E-08  | 8.54E-08 | 1.36E-07 | 9.68E-07 |
|     | cgd8_3130 |          |          |          |
| 2h  | 0.00E+00  | 0.00E+00 | 0.00E+00 | 0.00E+00 |
| 6h  | 0.00E+00  | 1.18E-09 | 0.00E+00 | 0.00E+00 |
| 12h | 9.74E-06  | 6.11E-06 | 3.14E-09 | 6.34E-06 |
| 24h | 2.15E-08  | 8.62E-07 | 1.82E-07 | 4.35E-07 |
| 36h | 2.41E-06  | 8.55E-07 | 3.81E-06 | 6.48E-06 |
| 48h | 6.44E-07  | 1.00E-07 | 3.05E-07 | 1.96E-06 |
| 72h | 2.93E-08  | 5.63E-08 | 7.04E-08 | 8.69E-07 |
|     | cgd8_3140 |          |          |          |
| 2h  | 2.28E-06  | 1.34E-06 | 1.77E-06 | 3.57E-05 |
| 6h  | 3.42E-06  | 1.46E-06 | 3.38E-06 | 2.02E-04 |
| 12h | 4.45E-07  | 2.99E-06 | 3.01E-09 | 4.26E-05 |
| 24h | 1.28E-07  | 2.44E-06 | 5.48E-06 | 1.59E-05 |
| 36h | 2.51E-06  | 2.44E-06 | 1.79E-06 | 2.41E-05 |
| 48h | 1.97E-05  | 1.04E-05 | 8.67E-06 | 9.01E-05 |
| 72h | 1.27E-06  | 1.80E-06 | 3.62E-06 | 3.04E-05 |
|     | cgd8_3150 |          |          |          |
| 2h  | 3.31E-03  | 1.81E-03 | 1.58E-03 | 9.25E-05 |
| 6h  | 3.28E-03  | 2.48E-03 | 2.73E-03 | 2.03E-04 |
| 12h | 2.54E-03  | 3.18E-03 | 4.95E-06 | 2.72E-04 |
| 24h | 1.19E-04  | 2.77E-03 | 5.04E-03 | 8.21E-05 |
| 36h | 1.21E-03  | 1.06E-03 | 8.64E-04 | 5.30E-05 |
| 48h | 1.21E-03  | 6.43E-04 | 1.38E-03 | 4.66E-05 |

|     |           |          |          |          |
|-----|-----------|----------|----------|----------|
| 72h | 1.25E-04  | 6.97E-04 | 6.09E-04 | 2.76E-05 |
|     | cgd8_3160 |          |          |          |
| 2h  | 4.46E-07  | 5.30E-07 | 4.03E-06 | 3.43E-06 |
| 6h  | 9.21E-06  | 2.97E-06 | 2.69E-06 | 3.20E-05 |
| 12h | 5.00E-07  | 9.00E-07 | 1.32E-08 | 5.70E-05 |
| 24h | 1.44E-06  | 2.52E-05 | 2.44E-05 | 1.58E-05 |
| 36h | 9.83E-06  | 9.32E-06 | 5.14E-06 | 8.79E-06 |
| 48h | 3.22E-05  | 9.17E-06 | 1.03E-05 | 1.29E-05 |
| 72h | 1.08E-05  | 1.85E-05 | 9.07E-06 | 3.86E-05 |
|     | cgd8_3170 |          |          |          |
| 2h  | 4.19E-05  | 3.14E-05 | 3.92E-05 | 3.62E-05 |
| 6h  | 9.92E-05  | 5.75E-05 | 7.80E-05 | 1.03E-04 |
| 12h | 5.18E-06  | 5.88E-06 | 9.66E-09 | 2.00E-04 |
| 24h | 9.93E-07  | 3.24E-05 | 7.41E-05 | 4.81E-05 |
| 36h | 4.96E-05  | 4.60E-05 | 2.13E-05 | 4.93E-05 |
| 48h | 8.73E-05  | 8.98E-06 | 1.78E-05 | 6.47E-05 |
| 72h | 1.38E-05  | 1.08E-05 | 7.28E-06 | 4.67E-05 |
|     | cgd8_3180 |          |          |          |
| 2h  | 6.49E-04  | 9.16E-05 | 2.06E-04 | 8.80E-07 |
| 6h  | 4.22E-03  | 1.99E-03 | 5.59E-03 | 9.94E-05 |
| 12h | 3.82E-04  | 5.29E-04 | 4.22E-07 | 7.67E-06 |
| 24h | 3.19E-05  | 7.62E-04 | 3.41E-03 | 4.99E-05 |
| 36h | 1.99E-03  | 1.43E-03 | 2.04E-03 | 1.08E-05 |
| 48h | 4.69E-04  | 2.20E-04 | 8.90E-04 | 2.21E-05 |
| 72h | 2.36E-05  | 3.91E-04 | 5.06E-04 | 8.79E-06 |
|     | cgd8_3190 |          |          |          |
| 2h  | 6.46E-07  | 7.61E-07 | 3.09E-07 | 5.54E-07 |
| 6h  | 6.36E-06  | 5.54E-06 | 9.97E-06 | 9.73E-06 |
| 12h | 1.38E-07  | 3.46E-07 | 2.37E-06 | 5.72E-07 |
| 24h | 1.09E-06  | 1.72E-06 | 7.27E-06 | 2.22E-06 |
| 36h | 1.12E-05  | 1.21E-06 | 2.54E-06 | 5.42E-06 |
| 48h | 1.61E-06  | 1.92E-06 | 2.22E-06 | 1.88E-05 |
| 72h | 5.13E-07  | 3.43E-07 | 1.88E-07 | 1.49E-08 |
|     | cgd8_3200 |          |          |          |
| 2h  | 1.72E-06  | 0.00E+00 | 0.00E+00 | 5.09E-06 |
| 6h  | 1.05E-03  | 1.01E-03 | 1.01E-03 | 9.03E-05 |
| 12h | 3.56E-05  | 0.00E+00 | 5.29E-05 | 8.15E-07 |
| 24h | 2.57E-04  | 1.26E-04 | 5.22E-04 | 1.17E-04 |
| 36h | 2.23E-04  | 7.67E-05 | 8.95E-05 | 2.77E-05 |
| 48h | 1.31E-04  | 7.08E-05 | 2.93E-04 | 2.04E-05 |
| 72h | 2.69E-05  | 6.15E-05 | 2.01E-05 | 2.50E-06 |
|     | cgd8_3210 |          |          |          |
| 2h  | 2.73E-08  | 7.34E-08 | 0.00E+00 | 1.09E-05 |
| 6h  | 8.69E-07  | 4.80E-07 | 7.59E-07 | 1.63E-06 |
| 12h | 4.01E-09  | 1.51E-08 | 6.93E-09 | 3.13E-08 |
| 24h | 1.04E-07  | 1.03E-07 | 2.57E-07 | 2.50E-07 |
| 36h | 1.17E-07  | 1.77E-07 | 1.12E-07 | 1.15E-07 |
| 48h | 1.39E-07  | 6.49E-08 | 9.77E-08 | 9.48E-08 |
| 72h | 3.39E-09  | 6.83E-08 | 4.37E-08 | 1.95E-09 |
|     | cgd8_3220 |          |          |          |
| 2h  | 6.22E-05  | 8.39E-05 | 0.00E+00 | 0.00E+00 |
| 6h  | 4.80E-05  | 1.43E-03 | 0.00E+00 | 0.00E+00 |
| 12h | 3.37E-05  | 0.00E+00 | 0.00E+00 | 0.00E+00 |

|     |           |          |          |          |
|-----|-----------|----------|----------|----------|
| 24h | 3.27E-05  | 1.19E-04 | 0.00E+00 | 0.00E+00 |
| 36h | 2.48E-05  | 8.22E-04 | 0.00E+00 | 0.00E+00 |
| 48h | 8.24E-06  | 5.08E-04 | 0.00E+00 | 0.00E+00 |
| 72h | 4.52E-06  | 4.18E-05 | 0.00E+00 | 0.00E+00 |
|     | cgd8_3230 |          |          |          |
| 2h  | 7.10E-05  | 6.30E-05 | 2.90E-05 | 1.38E-04 |
| 6h  | 8.98E-06  | 1.12E-05 | 1.35E-05 | 1.56E-05 |
| 12h | 6.02E-05  | 7.44E-05 | 6.34E-05 | 2.18E-05 |
| 24h | 6.29E-05  | 7.54E-05 | 5.02E-05 | 1.44E-05 |
| 36h | 2.55E-05  | 2.83E-05 | 2.30E-05 | 2.18E-05 |
| 48h | 4.96E-06  | 2.74E-06 | 1.03E-05 | 5.79E-06 |
| 72h | 3.66E-06  | 6.85E-06 | 4.10E-06 | 4.63E-07 |
|     | cgd8_3240 |          |          |          |
| 2h  | 8.54E-04  | 4.76E-04 | 2.59E-04 | 4.51E-04 |
| 6h  | 8.37E-06  | 2.23E-05 | 1.41E-05 | 7.89E-06 |
| 12h | 4.12E-03  | 6.38E-03 | 1.48E-03 | 9.14E-04 |
| 24h | 1.76E-03  | 9.64E-04 | 6.35E-04 | 4.61E-04 |
| 36h | 6.16E-04  | 6.47E-04 | 2.02E-03 | 1.53E-03 |
| 48h | 6.63E-04  | 8.14E-04 | 5.93E-04 | 1.49E-04 |
| 72h | 1.54E-04  | 8.19E-04 | 3.14E-04 | 1.37E-05 |
|     | cgd8_3250 |          |          |          |
| 2h  | 8.62E-07  | 2.22E-07 | 1.40E-07 | 4.59E-07 |
| 6h  | 9.95E-07  | 1.42E-06 | 6.29E-07 | 7.63E-07 |
| 12h | 1.99E-07  | 5.06E-07 | 4.38E-07 | 2.19E-07 |
| 24h | 3.87E-07  | 4.59E-07 | 1.71E-06 | 7.48E-07 |
| 36h | 1.92E-06  | 1.93E-06 | 1.86E-06 | 1.49E-06 |
| 48h | 2.15E-06  | 9.28E-07 | 2.22E-06 | 5.44E-07 |
| 72h | 5.27E-07  | 1.44E-06 | 6.59E-07 | 3.37E-07 |
|     | cgd8_3270 |          |          |          |
| 2h  | 6.55E-07  | 1.22E-06 | 2.12E-06 | 1.39E-05 |
| 6h  | 1.85E-04  | 4.94E-05 | 1.75E-04 | 2.87E-05 |
| 12h | 1.63E-04  | 4.25E-04 | 1.22E-04 | 1.87E-03 |
| 24h | 2.14E-05  | 2.06E-05 | 9.63E-05 | 2.66E-05 |
| 36h | 1.94E-05  | 3.01E-05 | 4.94E-05 | 4.47E-05 |
| 48h | 4.63E-05  | 2.14E-05 | 1.42E-04 | 2.73E-05 |
| 72h | 4.83E-05  | 4.93E-05 | 4.75E-05 | 2.59E-05 |
|     | cgd8_3280 |          |          |          |
| 2h  | 9.98E-07  | 1.39E-06 | 3.63E-07 | 1.18E-06 |
| 6h  | 1.04E-07  | 1.37E-07 | 4.51E-07 | 1.52E-07 |
| 12h | 1.65E-06  | 3.83E-06 | 3.03E-06 | 7.69E-07 |
| 24h | 1.18E-06  | 1.21E-06 | 8.27E-07 | 3.23E-07 |
| 36h | 1.34E-06  | 1.55E-06 | 1.83E-06 | 1.15E-06 |
| 48h | 5.78E-07  | 4.05E-07 | 7.01E-07 | 3.71E-07 |
| 72h | 2.58E-07  | 3.11E-07 | 1.27E-07 | 4.60E-08 |
|     | cgd8_3290 |          |          |          |
| 2h  | 7.53E-05  | 5.66E-05 | 2.08E-04 | 7.66E-05 |
| 6h  | 3.24E-04  | 2.27E-04 | 3.86E-04 | 1.28E-04 |
| 12h | 3.94E-04  | 4.91E-04 | 3.19E-04 | 1.32E-04 |
| 24h | 1.66E-04  | 2.48E-04 | 2.69E-04 | 1.54E-04 |
| 36h | 7.11E-05  | 1.07E-04 | 1.36E-04 | 6.59E-05 |
| 48h | 2.87E-04  | 1.32E-04 | 2.40E-04 | 3.39E-04 |
| 72h | 5.97E-05  | 8.74E-05 | 1.95E-05 | 1.60E-06 |
|     | cgd8_3300 |          |          |          |

|     |           |          |          |          |
|-----|-----------|----------|----------|----------|
| 2h  | 2.02E-07  | 3.49E-07 | 5.40E-08 | 6.46E-07 |
| 6h  | 9.21E-07  | 6.45E-07 | 1.02E-06 | 1.50E-06 |
| 12h | 9.60E-06  | 1.65E-04 | 4.77E-06 | 3.10E-06 |
| 24h | 2.66E-06  | 3.77E-06 | 2.21E-06 | 1.93E-06 |
| 36h | 2.91E-06  | 4.47E-06 | 4.15E-06 | 8.72E-06 |
| 48h | 2.05E-06  | 2.04E-06 | 2.52E-06 | 1.61E-05 |
| 72h | 2.21E-07  | 4.98E-07 | 2.54E-07 | 4.47E-08 |
|     | cgd8_3310 |          |          |          |
| 2h  | 8.97E-08  | 2.36E-08 | 6.05E-08 | 2.14E-07 |
| 6h  | 1.51E-06  | 3.58E-07 | 1.98E-06 | 3.22E-06 |
| 12h | 3.48E-07  | 3.08E-07 | 1.68E-07 | 4.86E-07 |
| 24h | 2.69E-07  | 2.74E-07 | 3.67E-07 | 1.84E-06 |
| 36h | 4.93E-07  | 7.17E-07 | 3.43E-07 | 2.77E-06 |
| 48h | 1.59E-07  | 1.74E-07 | 3.32E-07 | 5.46E-06 |
| 72h | 3.24E-07  | 2.43E-07 | 7.63E-08 | 8.93E-09 |
|     | cgd8_3320 |          |          |          |
| 2h  | 1.22E-03  | 1.93E-04 | 1.71E-04 | 2.20E-04 |
| 6h  | 1.44E-03  | 2.06E-04 | 9.44E-04 | 2.06E-03 |
| 12h | 1.94E-05  | 1.33E-06 | 2.97E-04 | 1.23E-04 |
| 24h | 3.50E-04  | 2.44E-05 | 3.25E-04 | 1.82E-03 |
| 36h | 2.41E-04  | 1.21E-05 | 1.32E-04 | 5.96E-05 |
| 48h | 1.16E-04  | 7.41E-06 | 3.10E-04 | 3.76E-04 |
| 72h | 3.29E-05  | 6.35E-06 | 3.82E-05 | 2.32E-05 |
|     | cgd8_3330 |          |          |          |
| 2h  | 6.49E-06  | 6.80E-06 | 6.06E-06 | 5.40E-05 |
| 6h  | 1.32E-05  | 3.13E-05 | 2.16E-05 | 3.50E-05 |
| 12h | 3.04E-06  | 8.49E-07 | 7.16E-06 | 1.27E-04 |
| 24h | 2.97E-05  | 4.66E-06 | 1.39E-05 | 3.16E-05 |
| 36h | 4.66E-06  | 1.34E-06 | 3.25E-06 | 2.77E-05 |
| 48h | 2.81E-06  | 1.12E-06 | 4.02E-06 | 2.05E-05 |
| 72h | 1.40E-06  | 8.58E-07 | 1.61E-06 | 6.40E-06 |
|     | cgd8_3360 |          |          |          |
| 2h  | 1.85E-07  | 3.02E-07 | 1.13E-07 | 0.00E+00 |
| 6h  | 1.04E-06  | 2.10E-06 | 1.46E-06 | 0.00E+00 |
| 12h | 6.04E-08  | 1.78E-08 | 1.50E-07 | 4.22E-07 |
| 24h | 3.75E-07  | 1.71E-07 | 5.03E-07 | 7.00E-07 |
| 36h | 2.70E-07  | 1.85E-07 | 3.85E-07 | 3.02E-07 |
| 48h | 3.18E-07  | 2.95E-07 | 6.13E-07 | 1.00E-06 |
| 72h | 7.78E-08  | 1.13E-07 | 1.10E-07 | 1.98E-07 |
|     | cgd8_3370 |          |          |          |
| 2h  | 9.94E-03  | 3.57E-04 | 1.20E-03 | 4.04E-03 |
| 6h  | 3.85E-02  | 2.69E-03 | 2.26E-02 | 3.27E-02 |
| 12h | 3.21E-03  | 1.84E-03 | 9.08E-03 | 4.24E-03 |
| 24h | 7.51E-03  | 4.49E-04 | 7.88E-03 | 5.45E-03 |
| 36h | 6.33E-03  | 5.09E-04 | 3.43E-03 | 1.70E-03 |
| 48h | 2.45E-03  | 9.55E-05 | 2.96E-03 | 1.93E-03 |
| 72h | 7.05E-04  | 1.32E-04 | 1.10E-03 | 3.65E-04 |
|     | cgd8_3380 |          |          |          |
| 2h  | 2.16E-03  | 1.62E-04 | 2.24E-04 | 3.67E-04 |
| 6h  | 2.83E-04  | 6.33E-05 | 9.36E-04 | 4.59E-04 |
| 12h | 8.96E-04  | 9.14E-06 | 1.03E-03 | 2.97E-04 |
| 24h | 1.08E-03  | 1.15E-04 | 5.75E-04 | 5.42E-04 |
| 36h | 4.87E-04  | 6.41E-05 | 2.98E-04 | 2.08E-04 |



|     |           |          |          |          |
|-----|-----------|----------|----------|----------|
| 48h | 3.81E-04  | 1.35E-05 | 3.39E-04 | 1.96E-04 |
| 72h | 6.44E-05  | 1.41E-05 | 1.10E-04 | 4.99E-05 |
|     | cgd8_3390 |          |          |          |
| 2h  | 8.19E-03  | 4.82E-04 | 4.05E-03 | 2.12E-03 |
| 6h  | 6.94E-04  | 7.20E-05 | 5.13E-04 | 4.73E-03 |
| 12h | 6.25E-03  | 6.24E-05 | 4.81E-03 | 9.99E-04 |
| 24h | 6.25E-03  | 1.75E-04 | 1.70E-03 | 9.77E-04 |
| 36h | 3.20E-03  | 1.21E-04 | 2.42E-03 | 7.86E-04 |
| 48h | 8.15E-05  | 2.63E-05 | 2.27E-03 | 1.11E-03 |
| 72h | 7.79E-04  | 1.26E-04 | 1.58E-03 | 9.38E-04 |
|     | cgd8_3410 |          |          |          |
| 2h  | 1.80E-05  | 8.74E-06 | 5.41E-06 | 4.73E-05 |
| 6h  | 1.32E-06  | 1.12E-06 | 1.84E-06 | 8.97E-06 |
| 12h | 6.80E-06  | 1.15E-06 | 9.03E-06 | 5.47E-06 |
| 24h | 1.65E-05  | 3.23E-06 | 2.64E-06 | 2.53E-06 |
| 36h | 1.23E-05  | 3.20E-06 | 5.37E-06 | 3.12E-06 |
| 48h | 1.08E-05  | 7.91E-07 | 5.98E-06 | 7.38E-06 |
| 72h | 2.12E-06  | 1.42E-06 | 4.55E-06 | 2.66E-06 |
|     | cgd8_3420 |          |          |          |
| 2h  | 2.43E-03  | 2.68E-04 | 1.95E-04 | 5.12E-04 |
| 6h  | 9.61E-03  | 3.24E-04 | 2.06E-02 | 5.42E-03 |
| 12h | 1.87E-03  | 2.19E-05 | 1.89E-03 | 6.77E-04 |
| 24h | 4.17E-03  | 5.99E-05 | 2.16E-03 | 1.04E-03 |
| 36h | 2.41E-03  | 1.57E-04 | 2.61E-03 | 9.46E-04 |
| 48h | 2.05E-04  | 2.59E-05 | 3.16E-03 | 1.15E-03 |
| 72h | 1.34E-03  | 5.69E-05 | 5.28E-04 | 3.25E-04 |
|     | cgd8_3430 |          |          |          |
| 2h  | 1.17E-05  | 1.55E-06 | 3.28E-06 | 2.23E-06 |
| 6h  | 1.10E-04  | 3.51E-05 | 4.44E-04 | 1.88E-04 |
| 12h | 6.10E-05  | 6.01E-06 | 2.11E-05 | 8.51E-06 |
| 24h | 1.56E-04  | 2.34E-06 | 6.45E-05 | 4.11E-05 |
| 36h | 1.77E-04  | 1.98E-05 | 1.41E-04 | 6.02E-05 |
| 48h | 1.12E-04  | 5.83E-06 | 8.63E-05 | 3.67E-05 |
| 72h | 2.53E-05  | 3.36E-06 | 2.71E-05 | 5.42E-06 |
|     | cgd8_3440 |          |          |          |
| 2h  | 1.25E-06  | 8.00E-06 | 1.36E-06 | 1.27E-06 |
| 6h  | 2.17E-06  | 3.73E-06 | 2.93E-06 | 7.07E-06 |
| 12h | 2.18E-07  | 9.81E-08 | 1.42E-06 | 3.72E-07 |
| 24h | 2.35E-06  | 8.91E-07 | 2.08E-06 | 1.34E-06 |
| 36h | 8.26E-07  | 6.06E-07 | 6.25E-07 | 8.48E-07 |
| 48h | 7.32E-07  | 7.59E-07 | 7.62E-07 | 5.78E-07 |
| 72h | 9.03E-08  | 2.83E-07 | 3.67E-07 | 1.19E-07 |
|     | cgd8_3450 |          |          |          |
| 2h  | 1.40E-04  | 7.89E-05 | 5.35E-05 | 5.13E-05 |
| 6h  | 4.05E-04  | 2.14E-04 | 4.38E-04 | 4.35E-04 |
| 12h | 7.36E-05  | 9.44E-06 | 1.27E-04 | 6.49E-05 |
| 24h | 1.64E-04  | 3.49E-05 | 1.87E-04 | 9.30E-05 |
| 36h | 1.06E-04  | 2.05E-05 | 9.14E-05 | 4.61E-05 |
| 48h | 5.39E-05  | 1.81E-05 | 8.15E-05 | 2.27E-05 |
| 72h | 1.12E-05  | 3.24E-06 | 1.52E-05 | 1.00E-05 |
|     | cgd8_3460 |          |          |          |
| 2h  | 1.29E-05  | 1.06E-05 | 1.78E-06 | 1.94E-06 |
| 6h  | 2.03E-06  | 3.77E-06 | 7.74E-06 | 7.02E-06 |

|     |           |          |          |          |
|-----|-----------|----------|----------|----------|
| 12h | 1.35E-06  | 2.77E-07 | 6.37E-06 | 9.66E-07 |
| 24h | 4.61E-06  | 8.08E-07 | 5.42E-06 | 3.24E-06 |
| 36h | 2.61E-06  | 2.80E-06 | 4.44E-06 | 1.54E-06 |
| 48h | 1.66E-06  | 4.57E-07 | 1.56E-06 | 2.95E-06 |
| 72h | 1.87E-07  | 5.07E-07 | 1.16E-06 | 6.05E-07 |
|     | cgd8_3470 |          |          |          |
| 2h  | 9.91E-07  | 5.96E-07 | 2.23E-05 | 8.21E-06 |
| 6h  | 1.40E-06  | 4.57E-06 | 9.85E-05 | 2.67E-05 |
| 12h | 1.23E-05  | 5.17E-06 | 9.76E-05 | 3.46E-05 |
| 24h | 3.58E-06  | 3.67E-06 | 1.79E-05 | 1.06E-05 |
| 36h | 1.07E-06  | 1.75E-06 | 2.43E-04 | 7.03E-06 |
| 48h | 9.29E-07  | 1.76E-06 | 1.19E-04 | 2.17E-05 |
| 72h | 4.00E-07  | 6.99E-07 | 4.15E-05 | 2.52E-06 |
|     | cgd8_3480 |          |          |          |
| 2h  | 5.01E-04  | 3.44E-04 | 6.06E-03 | 1.28E-02 |
| 6h  | 7.07E-04  | 1.15E-03 | 0.00E+00 | 2.70E-02 |
| 12h | 3.60E-04  | 4.89E-04 | 1.64E-03 | 5.47E-03 |
| 24h | 1.04E-03  | 4.38E-04 | 1.90E-03 | 1.21E-02 |
| 36h | 3.58E-04  | 1.19E-04 | 7.58E-04 | 6.38E-03 |
| 48h | 1.15E-04  | 1.81E-04 | 1.09E-04 | 5.03E-03 |
| 72h | 3.79E-05  | 3.50E-05 | 1.19E-04 | 4.29E-04 |
|     | cgd8_3500 |          |          |          |
| 2h  | 4.04E-07  | 0.00E+00 | 5.25E-05 | 3.32E-05 |
| 6h  | 0.00E+00  | 7.93E-09 | 4.27E-07 | 8.57E-06 |
| 12h | 3.66E-06  | 2.16E-06 | 1.39E-05 | 2.86E-04 |
| 24h | 6.28E-06  | 4.44E-06 | 8.20E-06 | 2.13E-04 |
| 36h | 1.29E-05  | 5.21E-06 | 3.81E-05 | 2.44E-04 |
| 48h | 9.41E-06  | 7.04E-06 | 1.34E-05 | 1.42E-03 |
| 72h | 1.04E-05  | 1.09E-05 | 2.27E-05 | 3.21E-04 |
|     | cgd8_3510 |          |          |          |
| 2h  | 1.18E-07  | 7.68E-08 | 9.94E-05 | 3.21E-06 |
| 6h  | 1.52E-08  | 4.64E-09 | 1.45E-07 | 7.38E-06 |
| 12h | 3.06E-07  | 2.88E-08 | 5.34E-07 | 1.27E-06 |
| 24h | 6.15E-07  | 5.28E-07 | 4.81E-07 | 1.42E-04 |
| 36h | 1.49E-06  | 3.58E-07 | 4.20E-06 | 3.94E-05 |
| 48h | 9.14E-07  | 4.17E-07 | 7.97E-07 | 8.21E-05 |
| 72h | 5.41E-07  | 7.77E-07 | 4.24E-06 | 1.40E-05 |
|     | cgd8_3520 |          |          |          |
| 2h  | 1.07E-03  | 8.88E-04 | 4.63E-03 | 1.18E-02 |
| 6h  | 5.83E-04  | 4.00E-04 | 6.81E-04 | 5.22E-03 |
| 12h | 3.84E-04  | 1.51E-03 | 4.96E-03 | 5.99E-03 |
| 24h | 1.90E-03  | 8.51E-04 | 7.64E-04 | 9.42E-03 |
| 36h | 8.65E-04  | 3.62E-04 | 7.93E-04 | 2.71E-03 |
| 48h | 1.66E-04  | 2.68E-04 | 2.02E-04 | 2.45E-03 |
| 72h | 4.35E-05  | 8.48E-05 | 3.94E-05 | 9.53E-04 |
|     | cgd8_3530 |          |          |          |
| 2h  | 3.31E-06  | 1.19E-06 | 7.37E-06 | 1.61E-05 |
| 6h  | 5.80E-07  | 3.55E-07 | 2.13E-06 | 1.86E-05 |
| 12h | 6.70E-07  | 4.45E-06 | 1.12E-06 | 8.59E-06 |
| 24h | 1.60E-06  | 8.44E-07 | 1.67E-06 | 1.64E-05 |
| 36h | 8.75E-07  | 9.27E-07 | 1.81E-06 | 1.10E-05 |
| 48h | 3.34E-07  | 4.47E-07 | 3.97E-07 | 6.19E-06 |
| 72h | 1.99E-07  | 2.79E-07 | 6.45E-07 | 2.54E-06 |

|     |           |          |          |          |
|-----|-----------|----------|----------|----------|
|     | cgd8_3560 |          |          |          |
| 2h  | 9.76E-07  | 3.38E-07 | 3.33E-06 | 1.38E-05 |
| 6h  | 2.21E-07  | 2.42E-07 | 5.07E-07 | 7.26E-06 |
| 12h | 8.76E-06  | 2.31E-06 | 4.57E-06 | 4.05E-05 |
| 24h | 2.24E-06  | 1.03E-06 | 4.31E-07 | 1.55E-05 |
| 36h | 8.32E-07  | 6.40E-07 | 2.49E-06 | 6.67E-06 |
| 48h | 4.06E-07  | 2.05E-07 | 1.38E-07 | 6.31E-06 |
| 72h | 1.11E-07  | 1.09E-07 | 5.12E-08 | 1.31E-06 |
|     | cgd8_3580 |          |          |          |
| 2h  | 5.63E-05  | 8.49E-05 | 3.31E-04 | 1.02E-03 |
| 6h  | 2.56E-04  | 2.54E-07 | 3.03E-05 | 3.99E-04 |
| 12h | 5.34E-03  | 1.30E-03 | 1.24E-04 | 6.23E-04 |
| 24h | 1.09E-03  | 6.63E-05 | 4.53E-05 | 5.21E-04 |
| 36h | 4.48E-04  | 2.58E-04 | 1.98E-04 | 1.16E-04 |
| 48h | 2.51E-04  | 1.79E-04 | 3.95E-05 | 6.48E-04 |
| 72h | 1.85E-04  | 1.51E-05 | 4.88E-05 | 1.74E-04 |
|     | cgd8_3590 |          |          |          |
| 2h  | 2.26E-03  | 2.45E-04 | 6.79E-04 | 2.23E-03 |
| 6h  | 1.01E-03  | 2.14E-03 | 4.68E-04 | 8.15E-04 |
| 12h | 1.57E-02  | 7.92E-03 | 3.71E-03 | 5.12E-03 |
| 24h | 2.64E-03  | 1.73E-03 | 3.44E-04 | 1.31E-03 |
| 36h | 1.72E-03  | 1.47E-03 | 1.39E-03 | 1.31E-03 |
| 48h | 4.25E-04  | 4.43E-04 | 1.49E-04 | 3.89E-04 |
| 72h | 2.22E-04  | 9.29E-05 | 1.02E-04 | 3.35E-04 |
|     | cgd8_3600 |          |          |          |
| 2h  | 1.54E-06  | 4.08E-08 | 3.48E-05 | 1.35E-05 |
| 6h  | 1.23E-07  | 2.92E-07 | 5.31E-06 | 3.48E-06 |
| 12h | 4.45E-05  | 1.56E-05 | 3.27E-05 | 1.40E-03 |
| 24h | 5.43E-06  | 4.28E-06 | 1.80E-05 | 5.87E-05 |
| 36h | 1.20E-05  | 1.23E-05 | 3.87E-05 | 3.64E-04 |
| 48h | 7.90E-06  | 7.83E-06 | 7.66E-06 | 2.06E-04 |
| 72h | 5.83E-06  | 9.67E-07 | 2.23E-06 | 1.13E-04 |
|     | cgd8_3610 |          |          |          |
| 2h  | 0.00E+00  | 0.00E+00 | 0.00E+00 | 0.00E+00 |
| 6h  | 0.00E+00  | 1.78E-05 | 0.00E+00 | 0.00E+00 |
| 12h | 4.02E-03  | 1.03E-03 | 3.76E-01 | 4.83E-04 |
| 24h | 3.37E-04  | 1.46E-04 | 7.79E-03 | 1.83E-04 |
| 36h | 1.14E-03  | 4.90E-04 | 8.13E-02 | 4.33E-04 |
| 48h | 2.16E-04  | 8.13E-04 | 6.84E-03 | 1.69E-04 |
| 72h | 2.82E-04  | 2.75E-03 | 5.86E-03 | 1.15E-04 |
|     | cgd8_3620 |          |          |          |
| 2h  | 0.00E+00  | 0.00E+00 | 2.29E-08 | 2.24E-07 |
| 6h  | 8.57E-07  | 1.05E-06 | 1.27E-05 | 3.01E-06 |
| 12h | 8.20E-07  | 6.20E-07 | 3.81E+00 | 2.10E-06 |
| 24h | 5.99E-07  | 6.57E-07 | 5.54E-02 | 1.85E-06 |
| 36h | 1.54E-06  | 1.23E-06 | 2.53E-06 | 9.17E-06 |
| 48h | 8.19E-07  | 1.00E-06 | 1.80E-06 | 7.45E-06 |
| 72h | 6.22E-07  | 9.92E-07 | 2.64E-07 | 4.79E-06 |
|     | cgd8_3780 |          |          |          |
| 2h  | 1.49E-08  | 6.09E-07 | 0.00E+00 | 0.00E+00 |
| 6h  | 2.58E-07  | 3.01E-06 | 8.66E-07 | 2.31E-07 |
| 12h | 3.33E-07  | 1.47E-06 | 2.21E-06 | 0.00E+00 |
| 24h | 5.23E-07  | 7.56E-07 | 1.96E-06 | 1.38E-05 |

|     |           |          |          |          |
|-----|-----------|----------|----------|----------|
| 36h | 1.49E-06  | 1.10E-06 | 1.78E-06 | 1.35E-04 |
| 48h | 3.33E-06  | 9.64E-07 | 1.92E-06 | 6.59E-06 |
| 72h | 4.00E-07  | 8.11E-07 | 1.31E-06 | 3.82E-06 |
|     | cgd8_3790 |          |          |          |
| 2h  | 0.00E+00  | 4.29E-06 | 0.00E+00 | 0.00E+00 |
| 6h  | 4.26E-06  | 4.10E-05 | 1.58E-04 | 3.84E-05 |
| 12h | 4.49E-06  | 1.07E-05 | 8.12E-05 | 8.60E-05 |
| 24h | 2.76E-05  | 4.09E-04 | 3.24E-04 | 4.68E-04 |
| 36h | 6.96E-05  | 1.39E-04 | 1.49E-04 | 2.86E-05 |
| 48h | 2.40E-04  | 5.78E-05 | 1.77E-04 | 4.65E-05 |
| 72h | 8.54E-05  | 5.10E-05 | 6.82E-05 | 3.57E-04 |
|     | cgd8_3800 |          |          |          |
| 2h  | 2.33E-05  | 2.56E-05 | 2.07E-05 | 1.27E-05 |
| 6h  | 2.05E-06  | 3.95E-06 | 9.59E-07 | 1.66E-06 |
| 12h | 3.46E-06  | 8.24E-06 | 9.38E-06 | 2.63E-06 |
| 24h | 1.00E-05  | 7.20E-06 | 1.01E-05 | 6.81E-06 |
| 36h | 2.11E-06  | 2.60E-06 | 3.19E-06 | 2.15E-06 |
| 48h | 5.08E-06  | 1.07E-06 | 4.68E-06 | 1.08E-05 |
| 72h | 1.46E-06  | 1.18E-06 | 4.76E-06 | 2.01E-05 |
|     | cgd8_3820 |          |          |          |
| 2h  | 1.72E-08  | 1.25E-08 | 4.11E-08 | 0.00E+00 |
| 6h  | 9.88E-08  | 3.74E-07 | 3.27E-07 | 9.74E-08 |
| 12h | 1.52E-07  | 4.88E-07 | 1.54E-07 | 5.45E-08 |
| 24h | 8.43E-08  | 1.98E-07 | 4.46E-07 | 1.29E-07 |
| 36h | 3.39E-07  | 1.91E-07 | 2.12E-07 | 1.16E-07 |
| 48h | 5.12E-07  | 2.53E-07 | 3.79E-07 | 3.02E-07 |
| 72h | 1.81E-07  | 1.10E-07 | 2.45E-07 | 4.01E-07 |
|     | cgd8_3830 |          |          |          |
| 2h  | 0.00E+00  | 0.00E+00 | 0.00E+00 | 5.79E-09 |
| 6h  | 1.42E-09  | 1.82E-08 | 1.59E-08 | 8.28E-09 |
| 12h | 4.34E-06  | 1.35E-05 | 2.35E-06 | 5.27E-07 |
| 24h | 3.29E-07  | 2.21E-07 | 2.06E-07 | 1.07E-07 |
| 36h | 3.22E-07  | 1.33E-07 | 9.33E-07 | 1.73E-07 |
| 48h | 8.85E-08  | 5.56E-08 | 5.52E-08 | 1.34E-07 |
| 72h | 6.77E-08  | 6.99E-08 | 2.17E-07 | 1.03E-07 |
|     | cgd8_3840 |          |          |          |
| 2h  | 2.57E-07  | 9.86E-07 | 6.41E-07 | 2.33E-07 |
| 6h  | 3.24E-07  | 4.27E-07 | 5.58E-07 | 1.85E-07 |
| 12h | 1.41E-07  | 7.22E-08 | 7.36E-07 | 3.27E-07 |
| 24h | 1.40E-07  | 2.78E-07 | 3.04E-07 | 3.20E-07 |
| 36h | 2.33E-07  | 3.07E-07 | 6.24E-07 | 1.66E-07 |
| 48h | 1.62E-07  | 1.35E-07 | 3.16E-07 | 2.96E-07 |
| 72h | 1.88E-07  | 1.88E-07 | 3.25E-07 | 2.31E-07 |
|     | cgd8_3850 |          |          |          |
| 2h  | 9.78E-05  | 6.12E-05 | 1.41E-07 | 3.82E-05 |
| 6h  | 5.01E-05  | 3.40E-04 | 1.61E-04 | 6.25E-05 |
| 12h | 3.03E-05  | 1.02E-04 | 2.48E-05 | 9.72E-06 |
| 24h | 2.81E-05  | 5.51E-05 | 1.34E-04 | 2.76E-05 |
| 36h | 8.74E-05  | 8.52E-05 | 5.60E-05 | 2.09E-05 |
| 48h | 1.14E-04  | 5.20E-05 | 1.07E-04 | 2.88E-05 |
| 72h | 1.27E-05  | 1.21E-05 | 2.90E-05 | 1.56E-05 |
|     | cgd8_3860 |          |          |          |
| 2h  | 4.29E-09  | 0.00E+00 | 0.00E+00 | 3.21E-09 |

|     |           |          |          |          |
|-----|-----------|----------|----------|----------|
| 6h  | 2.68E-08  | 1.51E-08 | 1.93E-08 | 9.10E-09 |
| 12h | 1.83E-08  | 3.24E-08 | 3.94E-08 | 8.52E-09 |
| 24h | 2.81E-08  | 8.04E-08 | 3.24E-07 | 5.89E-08 |
| 36h | 2.56E-07  | 1.70E-07 | 2.02E-07 | 6.57E-08 |
| 48h | 2.43E-07  | 1.11E-07 | 3.08E-07 | 1.54E-07 |
| 72h | 6.67E-08  | 9.98E-08 | 1.23E-07 | 7.74E-08 |
|     | cgd8_3870 |          |          |          |
| 2h  | 9.37E-05  | 9.72E-05 | 4.44E-06 | 2.20E-05 |
| 6h  | 1.90E-04  | 3.64E-04 | 3.53E-04 | 3.53E-04 |
| 12h | 2.20E-05  | 1.26E-05 | 2.03E-04 | 1.78E-05 |
| 24h | 6.25E-05  | 1.58E-04 | 3.57E-04 | 1.12E-04 |
| 36h | 3.81E-05  | 6.80E-05 | 7.64E-05 | 1.55E-05 |
| 48h | 9.40E-05  | 2.12E-05 | 6.79E-05 | 2.46E-05 |
| 72h | 3.76E-05  | 1.57E-05 | 3.12E-05 | 5.80E-06 |
|     | cgd8_3880 |          |          |          |
| 2h  | 6.28E-04  | 5.37E-04 | 1.01E-04 | 5.14E-05 |
| 6h  | 3.60E-04  | 2.40E-03 | 2.21E-03 | 5.68E-04 |
| 12h | 1.75E-05  | 1.13E-05 | 4.60E-04 | 3.07E-05 |
| 24h | 1.52E-04  | 3.38E-04 | 8.93E-04 | 2.52E-04 |
| 36h | 6.67E-05  | 1.19E-04 | 1.30E-04 | 2.06E-05 |
| 48h | 3.91E-04  | 1.16E-04 | 2.68E-04 | 2.51E-04 |
| 72h | 2.63E-05  | 8.66E-05 | 4.39E-05 | 4.72E-06 |
|     | cgd8_3890 |          |          |          |
| 2h  | 2.73E-04  | 2.95E-04 | 6.75E-05 | 8.78E-05 |
| 6h  | 3.83E-05  | 1.32E-04 | 1.33E-04 | 2.45E-04 |
| 12h | 8.70E-05  | 2.23E-04 | 3.59E-05 | 2.81E-05 |
| 24h | 2.32E-05  | 8.84E-05 | 9.52E-05 | 4.05E-05 |
| 36h | 5.53E-05  | 3.57E-05 | 7.74E-05 | 1.58E-05 |
| 48h | 5.01E-05  | 2.28E-05 | 7.84E-05 | 3.46E-05 |
| 72h | 7.78E-06  | 1.14E-05 | 1.03E-05 | 4.45E-06 |
|     | cgd8_3900 |          |          |          |
| 2h  | 1.29E-05  | 2.83E-05 | 6.45E-06 | 9.74E-06 |
| 6h  | 1.05E-04  | 2.56E-04 | 3.69E-04 | 1.63E-04 |
| 12h | 5.07E-06  | 1.02E-05 | 1.80E-05 | 3.82E-06 |
| 24h | 2.13E-05  | 3.50E-05 | 9.40E-05 | 5.58E-05 |
| 36h | 3.44E-05  | 6.70E-05 | 3.90E-05 | 1.03E-05 |
| 48h | 1.29E-05  | 8.30E-06 | 1.00E-05 | 8.74E-06 |
| 72h | 7.37E-06  | 5.93E-06 | 1.45E-05 | 5.71E-06 |
|     | cgd8_3910 |          |          |          |
| 2h  | 4.24E-06  | 5.86E-06 | 1.36E-07 | 7.28E-06 |
| 6h  | 3.04E-06  | 8.43E-04 | 4.37E-06 | 2.35E-05 |
| 12h | 9.78E-08  | 0.00E+00 | 1.73E-06 | 9.48E-06 |
| 24h | 1.94E-06  | 4.08E-06 | 1.59E-05 | 2.45E-05 |
| 36h | 1.39E-06  | 2.83E-06 | 1.30E-05 | 2.50E-05 |
| 48h | 1.26E-05  | 2.56E-05 | 8.20E-05 | 6.51E-05 |
| 72h | 1.14E-05  | 1.86E-05 | 1.72E-04 | 5.03E-05 |
|     | cgd8_3920 |          |          |          |
| 2h  | 3.51E-06  | 8.81E-05 | 9.44E-07 | 4.38E-06 |
| 6h  | 2.79E-06  | 8.10E-05 | 3.01E-05 | 2.15E-05 |
| 12h | 1.57E-07  | 1.51E-06 | 5.18E-06 | 2.47E-05 |
| 24h | 1.83E-06  | 2.56E-06 | 3.21E-05 | 2.11E-05 |
| 36h | 2.46E-06  | 8.15E-06 | 1.84E-05 | 7.14E-06 |
| 48h | 1.14E-05  | 2.77E-05 | 5.58E-05 | 2.80E-04 |

|     |           |          |          |          |
|-----|-----------|----------|----------|----------|
| 72h | 1.35E-05  | 3.11E-05 | 2.82E-04 | 8.64E-05 |
|     | cgd8_3930 |          |          |          |
| 2h  | 0.00E+00  | 0.00E+00 | 0.00E+00 | 0.00E+00 |
| 6h  | 0.00E+00  | 1.33E-08 | 3.93E-09 | 6.26E-09 |
| 12h | 2.99E-08  | 1.57E-06 | 4.55E-08 | 2.59E-07 |
| 24h | 8.19E-08  | 5.61E-08 | 2.19E-07 | 7.34E-08 |
| 36h | 1.33E-07  | 5.36E-07 | 2.76E-07 | 8.30E-07 |
| 48h | 1.50E-07  | 1.39E-07 | 2.66E-07 | 1.13E-06 |
| 72h | 2.35E-07  | 3.05E-07 | 6.16E-07 | 1.19E-06 |
|     | cgd8_3950 |          |          |          |
| 2h  | 1.66E-06  | 3.69E-07 | 0.00E+00 | 9.03E-07 |
| 6h  | 0.00E+00  | 3.28E-07 | 3.28E-06 | 5.15E-06 |
| 12h | 9.98E-08  | 1.36E-05 | 6.49E-06 | 1.25E-05 |
| 24h | 4.47E-07  | 1.35E-06 | 1.56E-04 | 4.18E-05 |
| 36h | 4.03E-06  | 7.49E-05 | 2.29E-05 | 5.00E-05 |
| 48h | 1.86E-06  | 1.25E-05 | 1.80E-05 | 6.11E-05 |
| 72h | 2.94E-06  | 3.99E-06 | 3.13E-06 | 7.89E-06 |
|     | cgd8_3960 |          |          |          |
| 2h  | 4.57E-07  | 8.95E-07 | 1.27E-06 | 4.35E-06 |
| 6h  | 1.89E-07  | 3.94E-07 | 5.99E-07 | 9.96E-07 |
| 12h | 3.76E-09  | 1.10E-08 | 2.97E-07 | 5.22E-07 |
| 24h | 1.31E-07  | 9.87E-08 | 8.37E-07 | 2.47E-07 |
| 36h | 3.49E-07  | 6.68E-07 | 3.46E-07 | 3.90E-07 |
| 48h | 9.94E-08  | 6.10E-07 | 1.79E-07 | 5.41E-07 |
| 72h | 3.90E-08  | 1.51E-06 | 9.87E-08 | 2.87E-08 |
|     | cgd8_3980 |          |          |          |
| 2h  | 0.00E+00  | 0.00E+00 | 0.00E+00 | 3.89E-09 |
| 6h  | 0.00E+00  | 0.00E+00 | 0.00E+00 | 0.00E+00 |
| 12h | 5.40E-07  | 2.14E-06 | 1.49E-06 | 1.37E-06 |
| 24h | 7.58E-08  | 2.44E-07 | 2.08E-07 | 9.60E-08 |
| 36h | 3.06E-07  | 1.16E-06 | 2.16E-06 | 2.82E-06 |
| 48h | 1.16E-07  | 1.13E-06 | 5.64E-07 | 4.27E-07 |
| 72h | 3.02E-07  | 3.51E-07 | 1.06E-06 | 5.78E-07 |
|     | cgd8_4010 |          |          |          |
| 2h  | 3.39E-06  | 1.58E-06 | 6.30E-07 | 6.58E-06 |
| 6h  | 1.52E-06  | 3.43E-06 | 1.55E-06 | 5.67E-06 |
| 12h | 3.79E-08  | 7.97E-08 | 1.65E-06 | 1.94E-05 |
| 24h | 9.47E-07  | 6.11E-07 | 2.38E-06 | 1.05E-06 |
| 36h | 3.87E-07  | 1.96E-06 | 2.16E-06 | 1.53E-06 |
| 48h | 3.41E-07  | 1.66E-06 | 4.86E-07 | 4.58E-07 |
| 72h | 7.31E-08  | 1.10E-07 | 6.01E-08 | 4.53E-08 |
|     | cgd8_4020 |          |          |          |
| 2h  | 6.69E-09  | 0.00E+00 | 0.00E+00 | 0.00E+00 |
| 6h  | 4.24E-09  | 6.08E-08 | 0.00E+00 | 9.51E-09 |
| 12h | 7.87E-06  | 4.86E-05 | 2.66E-05 | 2.83E-05 |
| 24h | 3.03E-06  | 1.14E-01 | 2.42E-06 | 1.23E-06 |
| 36h | 1.82E-06  | 1.01E-05 | 1.28E-05 | 1.31E-05 |
| 48h | 4.70E-07  | 1.67E-06 | 2.12E-06 | 3.24E-06 |
| 72h | 1.47E-07  | 2.37E-07 | 2.85E-07 | 3.87E-07 |
|     | cgd8_4030 |          |          |          |
| 2h  | 0.00E+00  | 0.00E+00 | 0.00E+00 | 0.00E+00 |
| 6h  | 0.00E+00  | 0.00E+00 | 0.00E+00 | 0.00E+00 |
| 12h | 1.10E-04  | 2.14E-03 | 7.88E-04 | 1.42E-04 |

|           |          |          |          |          |
|-----------|----------|----------|----------|----------|
| 24h       | 1.10E-04 | 2.02E-04 | 1.31E-04 | 3.35E-06 |
| 36h       | 4.25E-04 | 7.77E-04 | 3.86E-04 | 2.34E-05 |
| 48h       | 5.72E-05 | 2.94E-05 | 7.60E-05 | 7.99E-06 |
| 72h       | 1.46E-04 | 3.04E-06 | 3.38E-04 | 1.37E-05 |
| cgd8_4040 |          |          |          |          |
| 2h        | 0.00E+00 | 0.00E+00 | 0.00E+00 | 0.00E+00 |
| 6h        | 9.90E-05 | 5.93E-04 | 2.46E-03 | 1.48E-04 |
| 12h       | 1.34E-06 | 1.28E-04 | 3.54E-04 | 1.68E-05 |
| 24h       | 4.20E-05 | 1.95E-04 | 1.16E-03 | 8.30E-05 |
| 36h       | 1.45E-04 | 2.50E-04 | 6.95E-04 | 2.89E-04 |
| 48h       | 1.93E-04 | 6.51E-04 | 1.42E-04 | 9.56E-05 |
| 72h       | 5.75E-05 | 6.60E-05 | 5.66E-04 | 3.01E-05 |
| cgd8_4050 |          |          |          |          |
| 2h        | 1.23E-05 | 3.71E-05 | 2.69E-04 | 3.20E-05 |
| 6h        | 4.80E-05 | 4.97E-04 | 2.49E-04 | 1.90E-04 |
| 12h       | 2.12E-06 | 1.75E-05 | 3.38E-05 | 3.58E-05 |
| 24h       | 1.04E-05 | 7.11E-05 | 7.03E-05 | 3.68E-05 |
| 36h       | 1.10E-05 | 2.48E-05 | 1.89E-05 | 1.22E-05 |
| 48h       | 3.53E-06 | 7.73E-06 | 1.37E-05 | 1.32E-05 |
| 72h       | 4.83E-07 | 9.83E-07 | 1.19E-06 | 7.48E-07 |
| cgd8_4070 |          |          |          |          |
| 2h        | 0.00E+00 | 0.00E+00 | 0.00E+00 | 0.00E+00 |
| 6h        | 0.00E+00 | 0.00E+00 | 4.45E-08 | 0.00E+00 |
| 12h       | 3.39E-08 | 3.58E-07 | 6.41E-08 | 1.81E-07 |
| 24h       | 2.03E-08 | 5.79E-07 | 2.82E-07 | 3.10E-07 |
| 36h       | 7.37E-07 | 1.01E-06 | 3.19E-07 | 2.19E-07 |
| 48h       | 1.77E-07 | 1.64E-07 | 2.46E-07 | 6.72E-07 |
| 72h       | 4.62E-07 | 2.84E-07 | 4.06E-07 | 2.58E-07 |
| cgd8_4090 |          |          |          |          |
| 2h        | 6.09E-05 | 8.23E-06 | 4.13E-05 | 6.45E-05 |
| 6h        | 0.00E+00 | 2.16E-07 | 1.34E-06 | 4.01E-06 |
| 12h       | 2.61E-04 | 2.40E-04 | 0.00E+00 | 8.28E-05 |
| 24h       | 2.68E-04 | 2.67E-05 | 3.74E-05 | 3.54E-06 |
| 36h       | 8.01E-05 | 3.88E-05 | 1.87E-05 | 4.15E-05 |
| 48h       | 6.73E-05 | 2.37E-05 | 1.66E-04 | 2.12E-05 |
| 72h       | 8.65E-06 | 1.92E-05 | 4.55E-05 | 3.49E-05 |
| cgd8_4100 |          |          |          |          |
| 2h        | 3.30E-07 | 2.61E-07 | 7.16E-05 | 5.69E-08 |
| 6h        | 1.74E-07 | 1.04E-07 | 5.09E-08 | 8.99E-08 |
| 12h       | 7.65E-08 | 2.81E-07 | 1.85E-06 | 5.24E-07 |
| 24h       | 1.29E-06 | 2.23E-07 | 3.17E-06 | 2.91E-07 |
| 36h       | 6.54E-08 | 1.35E-07 | 4.63E-07 | 1.93E-07 |
| 48h       | 6.76E-08 | 9.98E-08 | 2.64E-06 | 7.99E-08 |
| 72h       | 4.02E-08 | 5.05E-08 | 2.81E-06 | 1.62E-07 |
| cgd8_4130 |          |          |          |          |
| 2h        | 5.06E-07 | 8.03E-08 | 5.29E-04 | 2.22E-07 |
| 6h        | 3.33E-06 | 1.26E-06 | 6.60E-05 | 1.68E-06 |
| 12h       | 0.00E+00 | 3.06E-07 | 1.12E-07 | 4.90E-06 |
| 24h       | 5.55E-07 | 1.12E-06 | 2.38E-06 | 5.35E-06 |
| 36h       | 2.45E-06 | 7.32E-07 | 1.07E-05 | 1.29E-06 |
| 48h       | 1.42E-06 | 7.23E-07 | 3.42E-05 | 1.09E-06 |
| 72h       | 3.02E-07 | 1.37E-06 | 3.99E-06 | 1.32E-06 |
| cgd8_4140 |          |          |          |          |

|     |           |          |          |          |
|-----|-----------|----------|----------|----------|
| 2h  | 1.26E-04  | 0.00E+00 | 2.46E-05 | 2.09E-05 |
| 6h  | 1.58E-04  | 2.92E-05 | 6.85E-06 | 7.23E-05 |
| 12h | 2.71E-06  | 1.73E-06 | 1.36E-05 | 3.39E-05 |
| 24h | 2.28E-05  | 6.69E-05 | 1.86E-04 | 2.04E-05 |
| 36h | 6.94E-05  | 2.63E-05 | 1.16E-04 | 3.33E-05 |
| 48h | 1.53E-04  | 4.86E-05 | 1.19E-04 | 5.21E-05 |
| 72h | 2.85E-05  | 3.90E-05 | 5.23E-05 | 3.11E-05 |
|     | cgd8_4150 |          |          |          |
| 2h  | 7.44E-07  | 7.66E-07 | 6.79E-04 | 1.86E-05 |
| 6h  | 3.23E-06  | 1.57E-06 | 4.38E-07 | 3.06E-05 |
| 12h | 9.99E-08  | 7.99E-07 | 3.75E-07 | 4.68E-06 |
| 24h | 5.32E-07  | 8.02E-07 | 1.18E-06 | 1.07E-05 |
| 36h | 3.01E-07  | 3.88E-07 | 2.51E-06 | 4.60E-06 |
| 48h | 2.54E-07  | 2.39E-07 | 9.48E-07 | 3.03E-06 |
| 72h | 1.89E-07  | 9.99E-07 | 3.03E-07 | 1.33E-06 |
|     | cgd8_4160 |          |          |          |
| 2h  | 7.30E-06  | 8.99E-06 | 3.67E-04 | 4.51E-05 |
| 6h  | 7.07E-05  | 4.74E-06 | 1.75E-05 | 1.58E-05 |
| 12h | 6.33E-06  | 6.84E-06 | 5.72E-05 | 1.60E-05 |
| 24h | 8.08E-06  | 7.48E-06 | 3.38E-05 | 4.92E-05 |
| 36h | 1.84E-05  | 8.61E-06 | 8.06E-05 | 3.58E-05 |
| 48h | 0.00E+00  | 0.00E+00 | 0.00E+00 | 7.71E-05 |
| 72h | 6.90E-05  | 1.25E-05 | 4.66E-05 | 1.55E-04 |
|     | cgd8_4200 |          |          |          |
| 2h  | 1.42E-06  | 2.04E-07 | 6.73E-06 | 3.14E-06 |
| 6h  | 0.00E+00  | 4.41E-07 | 9.19E-08 | 5.66E-07 |
| 12h | 4.79E-07  | 2.06E-07 | 1.33E-07 | 4.25E-07 |
| 24h | 2.25E-07  | 3.92E-07 | 1.10E-06 | 1.37E-06 |
| 36h | 1.61E-07  | 1.13E-07 | 3.29E-06 | 1.41E-06 |
| 48h | 5.19E-07  | 3.52E-07 | 2.38E-06 | 6.62E-07 |
| 72h | 1.55E-07  | 6.90E-07 | 1.76E-07 | 0.00E+00 |
|     | cgd8_4210 |          |          |          |
| 2h  | 3.64E-04  | 1.73E-04 | 1.24E-03 | 1.26E-04 |
| 6h  | 0.00E+00  | 2.45E-06 | 2.71E-06 | 4.76E-05 |
| 12h | 4.14E-05  | 8.59E-05 | 2.92E-05 | 6.75E-05 |
| 24h | 1.56E-04  | 7.96E-05 | 4.60E-05 | 3.82E-05 |
| 36h | 9.92E-05  | 4.88E-05 | 1.44E-05 | 7.81E-05 |
| 48h | 3.47E-04  | 1.13E-04 | 1.36E-04 | 2.60E-05 |
| 72h | 2.18E-04  | 2.29E-04 | 0.00E+00 | 3.98E-05 |
|     | cgd8_4220 |          |          |          |
| 2h  | 2.06E-05  | 4.91E-05 | 1.65E-03 | 4.98E-05 |
| 6h  | 2.55E-06  | 3.37E-06 | 1.63E-06 | 1.02E-05 |
| 12h | 1.04E-05  | 2.66E-05 | 1.12E-05 | 3.44E-05 |
| 24h | 1.85E-05  | 7.33E-06 | 3.03E-05 | 1.35E-05 |
| 36h | 5.05E-06  | 4.64E-06 | 1.12E-05 | 2.21E-05 |
| 48h | 7.33E-06  | 4.70E-06 | 1.24E-05 | 1.29E-05 |
| 72h | 1.56E-06  | 9.65E-06 | 1.84E-06 | 1.34E-05 |
|     | cgd8_4230 |          |          |          |
| 2h  | 0.00E+00  | 0.00E+00 | 1.13E-06 | 0.00E+00 |
| 6h  | 2.94E-07  | 5.79E-07 | 5.13E-06 | 7.10E-06 |
| 12h | 1.67E-09  | 1.34E-08 | 0.00E+00 | 0.00E+00 |
| 24h | 2.37E-07  | 6.70E-07 | 3.65E-07 | 2.12E-07 |
| 36h | 3.36E-06  | 7.41E-08 | 2.57E-07 | 2.39E-07 |



|     |           |          |          |          |
|-----|-----------|----------|----------|----------|
| 48h | 7.60E-06  | 6.80E-06 | 1.60E-05 | 1.29E-05 |
| 72h | 5.56E-06  | 1.35E-05 | 0.00E+00 | 3.83E-06 |
|     | cgd8_4240 |          |          |          |
| 2h  | 1.04E-04  | 1.79E-07 | 4.01E-05 | 2.32E-06 |
| 6h  | 2.13E-06  | 4.40E-06 | 3.81E-06 | 1.36E-05 |
| 12h | 6.90E-08  | 5.10E-07 | 1.96E-07 | 7.96E-07 |
| 24h | 4.58E-07  | 1.51E-06 | 1.89E-06 | 3.78E-06 |
| 36h | 3.45E-07  | 3.86E-07 | 6.23E-07 | 2.78E-06 |
| 48h | 5.07E-07  | 3.61E-07 | 6.56E-07 | 3.07E-06 |
| 72h | 3.75E-07  | 3.50E-07 | 8.65E-08 | 7.59E-07 |
|     | cgd8_4260 |          |          |          |
| 2h  | 8.04E-06  | 5.07E-06 | 7.16E-03 | 6.64E-05 |
| 6h  | 5.68E-06  | 6.09E-06 | 2.54E-04 | 8.31E-06 |
| 12h | 3.81E-06  | 1.36E-05 | 3.64E-06 | 8.12E-06 |
| 24h | 9.49E-06  | 5.31E-06 | 3.09E-06 | 1.20E-05 |
| 36h | 6.67E-06  | 7.15E-06 | 4.02E-06 | 1.38E-05 |
| 48h | 1.50E-05  | 1.79E-06 | 7.80E-06 | 4.22E-05 |
| 72h | 4.54E-07  | 1.97E-06 | 1.99E-06 | 1.19E-06 |
|     | cgd8_4280 |          |          |          |
| 2h  | 2.65E-06  | 1.14E-06 | 7.46E-06 | 0.00E+00 |
| 6h  | 1.71E-06  | 3.91E-06 | 0.00E+00 | 0.00E+00 |
| 12h | 2.55E-07  | 1.23E-05 | 0.00E+00 | 0.00E+00 |
| 24h | 1.78E-06  | 1.87E-06 | 0.00E+00 | 0.00E+00 |
| 36h | 1.27E-06  | 2.18E-06 | 0.00E+00 | 0.00E+00 |
| 48h | 1.99E-06  | 6.77E-06 | 0.00E+00 | 0.00E+00 |
| 72h | 2.26E-06  | 1.49E-05 | 0.00E+00 | 0.00E+00 |
|     | cgd8_4290 |          |          |          |
| 2h  | 1.99E-08  | 2.02E-08 | 2.69E-08 | 2.58E-05 |
| 6h  | 0.00E+00  | 0.00E+00 | 0.00E+00 | 2.48E-08 |
| 12h | 5.86E-10  | 0.00E+00 | 9.72E-08 | 2.00E-08 |
| 24h | 3.47E-08  | 7.94E-08 | 2.36E-08 | 9.43E-08 |
| 36h | 8.79E-08  | 5.57E-08 | 7.88E-08 | 1.82E-07 |
| 48h | 4.85E-06  | 4.66E-06 | 6.32E-06 | 4.95E-04 |
| 72h | 3.28E-06  | 9.29E-06 | 1.09E-05 | 2.64E-04 |
|     | cgd8_4300 |          |          |          |
| 2h  | 4.66E-09  | 0.00E+00 | 0.00E+00 | 0.00E+00 |
| 6h  | 5.83E-09  | 0.00E+00 | 6.31E-09 | 1.57E-09 |
| 12h | 0.00E+00  | 0.00E+00 | 6.14E-09 | 1.06E-09 |
| 24h | 2.60E-08  | 5.07E-08 | 1.67E-08 | 6.93E-09 |
| 36h | 1.02E-07  | 1.32E-07 | 5.66E-08 | 8.62E-08 |
| 48h | 2.26E-06  | 1.29E-06 | 7.43E-06 | 4.17E-06 |
| 72h | 2.92E-06  | 2.58E-06 | 4.21E-06 | 2.99E-06 |
|     | cgd8_4320 |          |          |          |
| 2h  | 3.16E-07  | 6.39E-06 | 3.86E-06 | 4.23E-06 |
| 6h  | 1.70E-07  | 1.76E-06 | 1.53E-07 | 3.93E-07 |
| 12h | 7.39E-07  | 3.05E-05 | 3.22E-06 | 1.87E-07 |
| 24h | 3.16E-07  | 5.78E-06 | 1.18E-06 | 3.48E-07 |
| 36h | 2.29E-06  | 1.49E-05 | 1.40E-06 | 1.97E-06 |
| 48h | 4.15E-07  | 6.26E-06 | 5.00E-06 | 5.35E-06 |
| 72h | 4.68E-06  | 2.99E-05 | 1.14E-05 | 1.19E-05 |
|     | cgd8_4340 |          |          |          |
| 2h  | 1.07E-03  | 5.16E-04 | 2.23E-03 | 4.44E-03 |
| 6h  | 1.15E-04  | 9.32E-04 | 2.23E-03 | 2.78E-03 |

|     |           |          |          |          |
|-----|-----------|----------|----------|----------|
| 12h | 1.52E-04  | 5.10E-04 | 5.28E-03 | 1.84E-05 |
| 24h | 3.84E-04  | 5.76E-04 | 2.83E-03 | 2.52E-04 |
| 36h | 2.60E-04  | 9.42E-05 | 6.31E-04 | 1.78E-03 |
| 48h | 5.13E-05  | 8.08E-05 | 9.30E-04 | 4.67E-04 |
| 72h | 3.16E-05  | 9.62E-05 | 6.33E-04 | 1.42E-04 |
|     | cgd8_4360 |          |          |          |
| 2h  | 8.56E-06  | 6.78E-05 | 2.23E-05 | 1.35E-05 |
| 6h  | 3.95E-05  | 2.28E-04 | 8.29E-05 | 1.56E-04 |
| 12h | 2.00E-06  | 2.34E-05 | 7.54E-05 | 2.89E-06 |
| 24h | 4.63E-06  | 3.72E-05 | 3.73E-05 | 6.18E-06 |
| 36h | 1.02E-05  | 4.10E-05 | 1.46E-05 | 9.56E-06 |
| 48h | 1.32E-06  | 8.72E-06 | 5.99E-06 | 5.58E-06 |
| 72h | 1.60E-06  | 4.65E-06 | 3.41E-06 | 2.33E-06 |
|     | cgd8_4380 |          |          |          |
| 2h  | 1.65E-07  | 6.08E-07 | 1.36E-07 | 2.17E-07 |
| 6h  | 1.76E-07  | 6.45E-07 | 3.63E-07 | 7.38E-07 |
| 12h | 5.09E-08  | 1.24E-07 | 3.91E-07 | 3.72E-08 |
| 24h | 1.32E-07  | 3.80E-07 | 5.84E-07 | 6.17E-08 |
| 36h | 2.83E-07  | 3.54E-07 | 2.11E-07 | 2.09E-07 |
| 48h | 1.44E-07  | 1.75E-07 | 2.42E-07 | 2.39E-07 |
| 72h | 2.01E-07  | 1.95E-07 | 2.61E-07 | 1.12E-07 |
|     | cgd8_4390 |          |          |          |
| 2h  | 0.00E+00  | 0.00E+00 | 0.00E+00 | 4.94E-10 |
| 6h  | 0.00E+00  | 0.00E+00 | 0.00E+00 | 0.00E+00 |
| 12h | 0.00E+00  | 0.00E+00 | 0.00E+00 | 0.00E+00 |
| 24h | 3.26E-10  | 8.69E-11 | 2.84E-09 | 2.71E-10 |
| 36h | 3.53E-08  | 1.33E-09 | 1.56E-08 | 5.52E-08 |
| 48h | 1.10E-05  | 4.88E-06 | 2.43E-05 | 8.25E-06 |
| 72h | 6.68E-06  | 6.52E-06 | 7.88E-06 | 6.87E-06 |
|     | cgd8_4400 |          |          |          |
| 2h  | 1.34E-06  | 5.37E-07 | 3.84E-07 | 1.14E-06 |
| 6h  | 3.83E-07  | 3.92E-07 | 2.15E-06 | 2.22E-06 |
| 12h | 3.14E-08  | 5.82E-08 | 3.94E-06 | 4.01E-08 |
| 24h | 1.17E-07  | 3.25E-07 | 1.72E-06 | 1.07E-07 |
| 36h | 6.29E-07  | 4.68E-07 | 3.70E-07 | 4.30E-07 |
| 48h | 1.90E-07  | 3.27E-07 | 5.24E-07 | 3.71E-07 |
| 72h | 6.92E-07  | 5.40E-07 | 8.92E-07 | 4.40E-07 |
|     | cgd8_4410 |          |          |          |
| 2h  | 2.16E-06  | 2.96E-06 | 1.71E-06 | 3.55E-06 |
| 6h  | 2.13E-06  | 2.70E-06 | 3.58E-06 | 1.11E-05 |
| 12h | 1.29E-07  | 5.16E-07 | 2.05E-06 | 7.68E-08 |
| 24h | 4.85E-07  | 1.32E-06 | 2.98E-06 | 3.03E-07 |
| 36h | 3.94E-07  | 1.45E-06 | 4.92E-07 | 5.11E-07 |
| 48h | 6.86E-07  | 4.39E-07 | 1.58E-06 | 8.80E-07 |
| 72h | 1.37E-07  | 5.92E-07 | 1.92E-07 | 1.85E-07 |
|     | cgd8_4420 |          |          |          |
| 2h  | 5.14E-07  | 4.47E-07 | 3.85E-07 | 1.30E-05 |
| 6h  | 2.46E-07  | 9.53E-07 | 2.62E-06 | 3.01E-06 |
| 12h | 1.17E-08  | 5.43E-08 | 1.68E-07 | 2.52E-09 |
| 24h | 1.05E-07  | 1.18E-07 | 3.59E-07 | 5.08E-08 |
| 36h | 1.37E-07  | 1.48E-07 | 1.02E-07 | 1.08E-07 |
| 48h | 5.51E-07  | 2.45E-07 | 4.10E-07 | 1.33E-06 |
| 72h | 1.28E-07  | 4.12E-07 | 2.02E-07 | 3.10E-07 |

|     |           |          |          |          |
|-----|-----------|----------|----------|----------|
|     | cgd8_4430 |          |          |          |
| 2h  | 3.06E-06  | 7.73E-07 | 1.12E-06 | 4.13E-06 |
| 6h  | 8.30E-07  | 2.70E-06 | 2.58E-06 | 1.14E-04 |
| 12h | 1.58E-07  | 1.78E-07 | 1.28E-06 | 5.46E-08 |
| 24h | 3.54E-07  | 2.00E-07 | 1.09E-06 | 1.68E-07 |
| 36h | 1.27E-06  | 4.19E-07 | 5.94E-07 | 3.07E-07 |
| 48h | 1.28E-07  | 1.25E-07 | 1.18E-07 | 1.72E-07 |
| 72h | 2.19E-07  | 1.14E-07 | 1.93E-07 | 7.32E-08 |
|     | cgd8_4450 |          |          |          |
| 2h  | 0.00E+00  | 0.00E+00 | 1.65E-08 | 0.00E+00 |
| 6h  | 0.00E+00  | 0.00E+00 | 0.00E+00 | 0.00E+00 |
| 12h | 0.00E+00  | 6.00E-09 | 0.00E+00 | 8.15E-09 |
| 24h | 9.18E-09  | 4.50E-09 | 8.32E-08 | 1.47E-07 |
| 36h | 4.09E-08  | 3.23E-08 | 1.90E-08 | 3.85E-07 |
| 48h | 2.90E-07  | 1.38E-07 | 5.92E-07 | 1.04E-06 |
| 72h | 2.28E-07  | 2.83E-07 | 8.68E-07 | 7.50E-07 |
|     | cgd8_4460 |          |          |          |
| 2h  | 1.17E-06  | 4.48E-07 | 8.08E-06 | 3.87E-05 |
| 6h  | 2.78E-06  | 2.42E-06 | 1.53E-05 | 1.23E-05 |
| 12h | 9.03E-07  | 5.28E-07 | 2.55E-06 | 3.14E-04 |
| 24h | 2.11E-06  | 1.04E-06 | 6.22E-06 | 5.70E-04 |
| 36h | 7.57E-07  | 7.77E-07 | 1.24E-06 | 1.09E-05 |
| 48h | 7.96E-07  | 5.68E-07 | 2.24E-06 | 8.71E-06 |
| 72h | 9.00E-07  | 1.32E-06 | 1.71E-06 | 1.51E-06 |
|     | cgd8_4470 |          |          |          |
| 2h  | 6.61E-06  | 1.62E-06 | 0.00E+00 | 9.30E-05 |
| 6h  | 3.25E-04  | 9.09E-04 | 4.43E-04 | 6.71E-04 |
| 12h | 8.22E-05  | 3.90E-04 | 2.46E-04 | 4.18E-04 |
| 24h | 1.75E-04  | 2.52E-04 | 2.64E-04 | 3.71E-04 |
| 36h | 2.00E-04  | 4.87E-04 | 1.82E-04 | 5.21E-04 |
| 48h | 2.13E-04  | 3.35E-04 | 1.29E-04 | 8.17E-04 |
| 72h | 4.12E-05  | 2.33E-04 | 1.48E-04 | 2.02E-04 |
|     | cgd8_4480 |          |          |          |
| 2h  | 0.00E+00  | 0.00E+00 | 0.00E+00 | 0.00E+00 |
| 6h  | 0.00E+00  | 0.00E+00 | 0.00E+00 | 1.85E-08 |
| 12h | 7.28E-06  | 9.35E-06 | 2.73E-05 | 1.02E-05 |
| 24h | 1.09E-06  | 2.91E-06 | 3.63E-06 | 3.66E-07 |
| 36h | 1.79E-06  | 1.28E-06 | 2.05E-05 | 1.48E-05 |
| 48h | 1.53E-06  | 1.79E-06 | 8.76E-06 | 5.48E-06 |
| 72h | 1.09E-06  | 1.59E-06 | 8.96E-06 | 4.52E-06 |
|     | cgd8_4490 |          |          |          |
| 2h  | 0.00E+00  | 0.00E+00 | 0.00E+00 | 0.00E+00 |
| 6h  | 0.00E+00  | 0.00E+00 | 0.00E+00 | 0.00E+00 |
| 12h | 1.98E-03  | 9.28E-04 | 4.14E-05 | 1.07E-04 |
| 24h | 2.14E-04  | 7.32E-05 | 1.86E-05 | 1.72E-05 |
| 36h | 1.01E-04  | 4.08E-05 | 3.52E-05 | 2.66E-05 |
| 48h | 1.16E-04  | 1.18E-04 | 6.04E-05 | 2.85E-05 |
| 72h | 1.17E-04  | 9.72E-05 | 6.36E-05 | 1.86E-05 |
|     | cgd8_4500 |          |          |          |
| 2h  | 1.05E-03  | 1.37E-04 | 7.11E-05 | 6.79E-04 |
| 6h  | 3.04E-04  | 1.03E-04 | 3.57E-05 | 9.89E-05 |
| 12h | 1.21E-03  | 2.07E-04 | 8.65E-05 | 1.95E-04 |
| 24h | 3.28E-03  | 3.75E-04 | 8.04E-05 | 1.26E-04 |

|     |           |          |          |          |
|-----|-----------|----------|----------|----------|
| 36h | 3.39E-04  | 4.14E-04 | 8.54E-05 | 1.01E-04 |
| 48h | 5.86E-05  | 1.32E-04 | 7.21E-05 | 1.53E-04 |
| 72h | 4.32E-04  | 1.49E-04 | 1.52E-04 | 8.21E-05 |
|     | cgd8_4540 |          |          |          |
| 2h  | 8.68E-09  | 1.06E-09 | 0.00E+00 | 2.32E-07 |
| 6h  | 4.04E-10  | 0.00E+00 | 1.04E-08 | 9.77E-10 |
| 12h | 6.87E-08  | 3.01E-08 | 1.41E-07 | 1.36E-07 |
| 24h | 3.34E-08  | 3.14E-08 | 1.59E-08 | 3.38E-08 |
| 36h | 1.04E-07  | 4.53E-08 | 1.14E-07 | 8.61E-08 |
| 48h | 4.81E-08  | 4.14E-08 | 5.03E-08 | 1.36E-07 |
| 72h | 8.00E-08  | 2.64E-08 | 6.73E-08 | 2.85E-08 |
|     | cgd8_4550 |          |          |          |
| 2h  | 0.00E+00  | 0.00E+00 | 0.00E+00 | 0.00E+00 |
| 6h  | 0.00E+00  | 0.00E+00 | 0.00E+00 | 0.00E+00 |
| 12h | 4.57E-08  | 2.68E-08 | 9.62E-09 | 5.60E-08 |
| 24h | 1.12E-09  | 1.73E-09 | 6.76E-10 | 7.11E-09 |
| 36h | 6.97E-09  | 1.74E-08 | 2.47E-08 | 7.76E-09 |
| 48h | 1.57E-08  | 1.51E-08 | 3.31E-08 | 2.33E-08 |
| 72h | 7.68E-09  | 1.29E-08 | 2.47E-08 | 3.46E-08 |
|     | cgd8_4570 |          |          |          |
| 2h  | 8.51E-08  | 1.15E-08 | 1.51E-09 | 5.52E-07 |
| 6h  | 4.61E-08  | 1.02E-08 | 1.03E-07 | 1.57E-07 |
| 12h | 2.63E-06  | 1.47E-06 | 5.37E-06 | 1.36E-06 |
| 24h | 4.95E-07  | 1.79E-07 | 5.75E-07 | 3.07E-07 |
| 36h | 8.31E-07  | 4.91E-07 | 1.14E-06 | 2.11E-06 |
| 48h | 2.78E-07  | 2.44E-07 | 4.13E-07 | 5.94E-07 |
| 72h | 1.19E-07  | 7.38E-08 | 3.18E-07 | 1.02E-07 |
|     | cgd8_4620 |          |          |          |
| 2h  | 1.41E-05  | 1.69E-05 | 5.82E-06 | 2.91E-05 |
| 6h  | 4.01E-06  | 4.67E-06 | 1.09E-05 | 9.19E-06 |
| 12h | 5.96E-06  | 5.27E-06 | 8.14E-06 | 5.07E-06 |
| 24h | 5.84E-06  | 6.12E-06 | 8.50E-06 | 2.02E-06 |
| 36h | 4.68E-06  | 2.22E-06 | 4.67E-06 | 4.74E-06 |
| 48h | 8.10E-06  | 3.93E-06 | 5.12E-06 | 1.17E-05 |
| 72h | 2.51E-06  | 1.64E-06 | 4.45E-06 | 2.26E-06 |
|     | cgd8_4640 |          |          |          |
| 2h  | 4.31E-06  | 2.99E-05 | 1.66E-06 | 8.06E-05 |
| 6h  | 4.66E-07  | 3.58E-06 | 6.47E-07 | 1.71E-06 |
| 12h | 1.38E-06  | 5.24E-06 | 1.07E-06 | 1.78E-07 |
| 24h | 7.38E-07  | 8.64E-07 | 4.14E-06 | 3.05E-07 |
| 36h | 2.34E-06  | 6.54E-06 | 2.85E-06 | 1.80E-06 |
| 48h | 2.22E-06  | 2.71E-06 | 2.91E-06 | 2.76E-05 |
| 72h | 1.84E-06  | 5.96E-06 | 7.40E-06 | 1.19E-06 |
|     | cgd8_4660 |          |          |          |
| 2h  | 0.00E+00  | 0.00E+00 | 0.00E+00 | 0.00E+00 |
| 6h  | 0.00E+00  | 3.67E-09 | 1.78E-09 | 0.00E+00 |
| 12h | 3.02E-08  | 3.61E-08 | 1.51E-08 | 1.45E-07 |
| 24h | 1.13E-08  | 7.25E-09 | 1.05E-09 | 1.09E-09 |
| 36h | 1.18E-08  | 7.47E-09 | 1.08E-08 | 3.05E-08 |
| 48h | 1.42E-07  | 8.83E-08 | 5.48E-08 | 1.43E-07 |
| 72h | 8.02E-08  | 2.15E-08 | 9.43E-08 | 4.51E-08 |
|     | cgd8_4710 |          |          |          |
| 2h  | 1.33E-04  | 2.06E-04 | 6.25E-04 | 6.43E-05 |

|     |           |          |          |          |
|-----|-----------|----------|----------|----------|
| 6h  | 5.91E-05  | 3.77E-06 | 1.03E-05 | 9.79E-04 |
| 12h | 1.24E-03  | 2.22E-04 | 1.41E-03 | 3.40E-03 |
| 24h | 1.98E-03  | 3.25E-04 | 9.60E-04 | 1.40E-04 |
| 36h | 4.47E-04  | 1.14E-04 | 3.98E-04 | 6.52E-04 |
| 48h | 3.81E-04  | 5.38E-05 | 3.60E-04 | 1.62E-03 |
| 72h | 2.42E-04  | 9.54E-05 | 3.32E-04 | 1.09E-03 |
|     | cgd8_4730 |          |          |          |
| 2h  | 1.46E-06  | 3.61E-08 | 0.00E+00 | 1.17E-05 |
| 6h  | 1.94E-05  | 2.46E-06 | 2.31E-05 | 1.06E-04 |
| 12h | 1.60E-04  | 1.62E-05 | 1.45E-04 | 1.86E-04 |
| 24h | 3.71E-05  | 1.58E-05 | 1.18E-04 | 8.26E-05 |
| 36h | 6.14E-05  | 1.38E-05 | 9.95E-05 | 1.68E-04 |
| 48h | 4.09E-05  | 1.49E-05 | 8.43E-05 | 4.80E-05 |
| 72h | 1.87E-05  | 4.50E-06 | 2.84E-05 | 6.49E-05 |
|     | cgd8_4740 |          |          |          |
| 2h  | 4.01E-08  | 7.38E-08 | 1.61E-07 | 2.14E-06 |
| 6h  | 2.45E-07  | 6.59E-08 | 9.43E-08 | 1.41E-06 |
| 12h | 2.37E-09  | 3.19E-10 | 2.17E-08 | 4.76E-09 |
| 24h | 9.28E-08  | 7.01E-08 | 1.02E-07 | 1.04E-07 |
| 36h | 1.76E-07  | 5.60E-08 | 6.10E-08 | 9.56E-08 |
| 48h | 7.78E-07  | 1.33E-07 | 4.54E-07 | 1.31E-06 |
| 72h | 5.36E-07  | 5.71E-08 | 3.68E-08 | 1.20E-07 |
|     | cgd8_4760 |          |          |          |
| 2h  | 3.88E-08  | 1.45E-07 | 8.61E-08 | 1.34E-06 |
| 6h  | 2.41E-07  | 1.12E-07 | 1.09E-07 | 2.15E-06 |
| 12h | 1.73E-07  | 8.90E-09 | 6.19E-07 | 4.48E-07 |
| 24h | 3.51E-07  | 1.46E-07 | 2.63E-07 | 5.69E-07 |
| 36h | 2.21E-07  | 1.81E-07 | 2.39E-07 | 1.61E-07 |
| 48h | 2.43E-07  | 2.49E-08 | 1.03E-07 | 2.21E-07 |
| 72h | 1.17E-07  | 5.29E-08 | 6.51E-08 | 1.87E-07 |
|     | cgd8_4770 |          |          |          |
| 2h  | 8.04E-05  | 8.18E-05 | 3.92E-05 | 8.02E-05 |
| 6h  | 1.65E-03  | 9.18E-05 | 2.52E-03 | 4.51E-04 |
| 12h | 3.68E-05  | 4.00E-06 | 3.06E-04 | 1.16E-04 |
| 24h | 7.39E-05  | 2.41E-05 | 4.97E-04 | 2.21E-04 |
| 36h | 3.51E-04  | 1.00E-04 | 3.15E-04 | 4.98E-05 |
| 48h | 2.22E-04  | 4.48E-05 | 3.25E-04 | 2.06E-05 |
| 72h | 7.71E-05  | 1.25E-05 | 7.04E-05 | 4.61E-05 |
|     | cgd8_4790 |          |          |          |
| 2h  | 1.83E-05  | 6.26E-04 | 7.48E-04 | 5.20E-05 |
| 6h  | 9.08E-04  | 8.49E-04 | 1.96E-04 | 6.69E-05 |
| 12h | 2.53E-04  | 2.39E-04 | 5.11E-04 | 1.43E-04 |
| 24h | 2.94E-04  | 7.66E-04 | 4.42E-04 | 7.42E-05 |
| 36h | 4.44E-04  | 8.26E-04 | 2.85E-04 | 1.38E-05 |
| 48h | 1.82E-04  | 2.67E-04 | 3.45E-04 | 1.01E-05 |
| 72h | 4.59E-04  | 1.21E-04 | 1.30E-04 | 1.27E-05 |
|     | cgd7_2680 |          |          |          |
| 2h  | 1.06E-07  | 1.12E-06 | 6.03E-07 | 1.44E-05 |
| 6h  | 2.31E-06  | 1.09E-06 | 5.15E-06 | 6.36E-05 |
| 12h | 5.24E-06  | 1.63E-06 | 4.61E-06 | 1.44E-05 |
| 24h | 1.26E-06  | 8.59E-07 | 6.74E-06 | 1.14E-05 |
| 36h | 1.87E-06  | 1.58E-06 | 1.81E-06 | 1.55E-05 |
| 48h | 3.16E-06  | 5.90E-07 | 4.44E-06 | 3.59E-05 |

|     |           |          |          |          |
|-----|-----------|----------|----------|----------|
| 72h | 9.42E-07  | 6.27E-07 | 1.30E-06 | 1.19E-05 |
|     | cgd7_2700 |          |          |          |
| 2h  | 3.70E-07  | 4.61E-07 | 8.91E-08 | 2.42E-05 |
| 6h  | 7.47E-08  | 2.26E-08 | 8.61E-07 | 2.80E-05 |
| 12h | 1.57E-07  | 2.67E-07 | 1.11E-06 | 1.16E-05 |
| 24h | 4.11E-07  | 5.00E-07 | 2.69E-06 | 1.31E-05 |
| 36h | 1.43E-06  | 1.14E-06 | 1.91E-06 | 8.92E-06 |
| 48h | 7.33E-06  | 2.94E-06 | 4.02E-06 | 3.23E-05 |
| 72h | 1.03E-05  | 2.40E-06 | 6.89E-06 | 3.58E-05 |
|     | cgd7_2710 |          |          |          |
| 2h  | 4.02E-07  | 3.68E-06 | 4.32E-07 | 2.99E-05 |
| 6h  | 8.58E-07  | 1.29E-06 | 7.09E-06 | 1.40E-04 |
| 12h | 1.59E-07  | 3.77E-07 | 7.37E-07 | 8.98E-06 |
| 24h | 4.33E-07  | 1.02E-06 | 1.43E-06 | 1.28E-05 |
| 36h | 1.77E-06  | 3.36E-06 | 9.74E-07 | 1.44E-05 |
| 48h | 1.44E-06  | 1.13E-06 | 8.17E-07 | 1.62E-05 |
| 72h | 6.84E-07  | 4.83E-07 | 1.24E-07 | 4.14E-06 |
|     | cgd7_2720 |          |          |          |
| 2h  | 1.22E-06  | 1.69E-05 | 2.77E-06 | 4.38E-04 |
| 6h  | 3.30E-06  | 6.00E-06 | 2.76E-06 | 2.36E-04 |
| 12h | 1.84E-07  | 2.76E-07 | 9.93E-07 | 2.33E-05 |
| 24h | 8.48E-07  | 2.42E-06 | 4.04E-06 | 7.72E-05 |
| 36h | 2.35E-06  | 7.23E-06 | 2.12E-06 | 7.88E-05 |
| 48h | 1.14E-06  | 2.21E-06 | 8.97E-07 | 3.33E-05 |
| 72h | 1.35E-06  | 3.58E-07 | 3.09E-07 | 1.25E-05 |
|     | cgd7_2740 |          |          |          |
| 2h  | 1.26E-06  | 2.60E-08 | 0.00E+00 | 1.44E-07 |
| 6h  | 3.12E-06  | 2.42E-06 | 3.67E-07 | 7.31E-06 |
| 12h | 6.36E-08  | 1.12E-08 | 4.08E-08 | 5.38E-08 |
| 24h | 1.67E-06  | 2.94E-07 | 4.80E-07 | 1.05E-06 |
| 36h | 3.93E-07  | 3.03E-07 | 2.12E-07 | 6.34E-07 |
| 48h | 9.89E-07  | 3.83E-07 | 3.44E-07 | 5.75E-07 |
| 72h | 1.90E-07  | 1.59E-07 | 3.80E-08 | 1.89E-07 |
|     | cgd7_2760 |          |          |          |
| 2h  | 1.24E-05  | 5.52E-07 | 0.00E+00 | 1.21E-05 |
| 6h  | 1.98E-06  | 1.24E-06 | 2.21E-08 | 1.51E-07 |
| 12h | 2.44E-06  | 3.58E-08 | 1.26E-07 | 4.72E-08 |
| 24h | 7.41E-06  | 1.02E-06 | 3.86E-07 | 4.76E-07 |
| 36h | 5.87E-06  | 2.45E-06 | 3.11E-07 | 5.19E-07 |
| 48h | 2.34E-05  | 4.46E-06 | 1.67E-06 | 3.32E-06 |
| 72h | 1.16E-05  | 5.44E-06 | 1.19E-06 | 2.27E-06 |
|     | cgd7_2770 |          |          |          |
| 2h  | 6.02E-07  | 4.87E-09 | 0.00E+00 | 9.28E-09 |
| 6h  | 3.35E-08  | 1.84E-08 | 2.66E-09 | 0.00E+00 |
| 12h | 2.76E-06  | 5.87E-07 | 2.68E-07 | 2.64E-07 |
| 24h | 2.98E-06  | 7.00E-07 | 6.49E-07 | 8.28E-07 |
| 36h | 4.39E-06  | 3.16E-06 | 1.29E-06 | 2.03E-06 |
| 48h | 1.43E-05  | 1.90E-06 | 2.05E-06 | 5.21E-06 |
| 72h | 9.72E-06  | 3.63E-06 | 2.30E-06 | 3.41E-06 |
|     | cgd7_2780 |          |          |          |
| 2h  | 0.00E+00  | 0.00E+00 | 0.00E+00 | 0.00E+00 |
| 6h  | 0.00E+00  | 1.31E-07 | 0.00E+00 | 0.00E+00 |
| 12h | 2.04E-04  | 3.25E-04 | 9.24E-06 | 8.82E-06 |

|           |          |          |          |          |
|-----------|----------|----------|----------|----------|
| 24h       | 3.77E-05 | 1.56E-05 | 1.07E-06 | 2.19E-06 |
| 36h       | 9.16E-06 | 1.94E-05 | 4.18E-06 | 6.31E-06 |
| 48h       | 8.69E-06 | 2.94E-06 | 7.73E-07 | 1.15E-06 |
| 72h       | 2.28E-05 | 1.05E-05 | 8.83E-07 | 1.43E-06 |
| cgd7_2790 |          |          |          |          |
| 2h        | 7.71E-05 | 1.24E-04 | 8.59E-07 | 3.83E-06 |
| 6h        | 1.51E-04 | 2.43E-04 | 9.83E-06 | 8.55E-06 |
| 12h       | 1.31E-05 | 1.56E-04 | 6.07E-06 | 1.05E-06 |
| 24h       | 1.68E-05 | 1.03E-04 | 6.24E-06 | 6.17E-06 |
| 36h       | 1.41E-05 | 4.99E-05 | 5.95E-06 | 3.33E-06 |
| 48h       | 9.30E-06 | 1.95E-05 | 5.15E-06 | 4.03E-06 |
| 72h       | 2.09E-05 | 4.24E-05 | 1.12E-06 | 2.51E-06 |
| cgd7_2820 |          |          |          |          |
| 2h        | 7.57E-05 | 3.21E-05 | 0.00E+00 | 4.84E-06 |
| 6h        | 2.67E-05 | 1.02E-05 | 2.38E-06 | 1.60E-06 |
| 12h       | 1.86E-05 | 3.70E-05 | 2.82E-06 | 1.22E-06 |
| 24h       | 1.31E-05 | 1.89E-05 | 6.00E-06 | 8.70E-06 |
| 36h       | 1.03E-04 | 4.99E-05 | 3.84E-06 | 5.84E-06 |
| 48h       | 6.37E-05 | 2.31E-04 | 4.29E-05 | 7.92E-05 |
| 72h       | 1.66E-05 | 5.72E-05 | 8.90E-06 | 2.11E-06 |
| cgd7_2830 |          |          |          |          |
| 2h        | 3.77E-06 | 1.16E-06 | 2.28E-07 | 2.17E-06 |
| 6h        | 9.68E-07 | 1.48E-06 | 4.26E-07 | 9.51E-07 |
| 12h       | 3.22E-07 | 2.30E-07 | 2.63E-07 | 3.21E-07 |
| 24h       | 1.69E-06 | 2.74E-07 | 4.33E-07 | 6.55E-07 |
| 36h       | 4.95E-07 | 9.45E-07 | 3.67E-07 | 7.07E-07 |
| 48h       | 9.43E-07 | 4.29E-07 | 1.83E-07 | 3.95E-07 |
| 72h       | 4.39E-07 | 1.65E-07 | 8.40E-08 | 8.72E-08 |
| cgd7_2850 |          |          |          |          |
| 2h        | 1.47E-04 | 1.47E-05 | 8.13E-06 | 2.09E-05 |
| 6h        | 8.52E-04 | 1.62E-05 | 7.80E-06 | 2.08E-05 |
| 12h       | 1.82E-04 | 7.29E-06 | 8.24E-06 | 5.75E-06 |
| 24h       | 3.52E-04 | 1.06E-05 | 9.54E-06 | 1.39E-05 |
| 36h       | 7.69E-05 | 6.34E-06 | 6.62E-06 | 8.05E-06 |
| 48h       | 1.79E-04 | 7.28E-06 | 2.62E-06 | 5.92E-06 |
| 72h       | 1.14E-05 | 1.53E-06 | 4.82E-07 | 6.83E-07 |
| cgd7_2860 |          |          |          |          |
| 2h        | 0.00E+00 | 3.78E-10 | 1.24E-08 | 4.26E-10 |
| 6h        | 1.38E-09 | 4.15E-09 | 8.49E-08 | 9.30E-08 |
| 12h       | 9.94E-08 | 1.49E-08 | 5.70E-08 | 3.65E-08 |
| 24h       | 3.14E-08 | 5.35E-08 | 7.71E-08 | 1.30E-07 |
| 36h       | 1.18E-07 | 9.27E-08 | 1.18E-07 | 2.80E-07 |
| 48h       | 2.52E-07 | 5.43E-08 | 1.17E-07 | 3.00E-07 |
| 72h       | 3.79E-08 | 5.98E-08 | 2.98E-08 | 1.36E-08 |
| cgd7_2870 |          |          |          |          |
| 2h        | 0.00E+00 | 0.00E+00 | 0.00E+00 | 0.00E+00 |
| 6h        | 2.36E-06 | 5.68E-07 | 6.91E-08 | 1.98E-07 |
| 12h       | 1.12E-04 | 2.97E-04 | 9.36E-05 | 4.14E-05 |
| 24h       | 1.82E-05 | 3.18E-05 | 3.81E-06 | 7.49E-06 |
| 36h       | 1.27E-05 | 3.12E-05 | 2.16E-05 | 3.56E-05 |
| 48h       | 2.00E-05 | 2.02E-05 | 1.59E-06 | 3.71E-06 |
| 72h       | 5.72E-06 | 9.20E-06 | 6.49E-07 | 1.88E-06 |
| cgd7_2900 |          |          |          |          |

|     |           |          |          |          |
|-----|-----------|----------|----------|----------|
| 2h  | 3.14E-06  | 2.25E-06 | 3.23E-07 | 3.25E-06 |
| 6h  | 1.03E-06  | 1.07E-06 | 1.31E-06 | 1.87E-06 |
| 12h | 6.60E-07  | 2.05E-07 | 1.25E-06 | 4.52E-07 |
| 24h | 1.22E-06  | 4.89E-07 | 1.11E-06 | 7.92E-07 |
| 36h | 2.51E-06  | 9.83E-07 | 1.97E-06 | 1.09E-06 |
| 48h | 2.00E-06  | 4.88E-07 | 8.80E-07 | 1.19E-06 |
| 72h | 6.03E-07  | 2.65E-07 | 4.21E-07 | 2.56E-07 |
|     | cgd7_2910 |          |          |          |
| 2h  | 4.49E-04  | 6.43E-04 | 2.69E-05 | 2.34E-04 |
| 6h  | 7.78E-05  | 7.67E-04 | 9.60E-05 | 3.60E-04 |
| 12h | 8.60E-05  | 1.38E-04 | 1.79E-04 | 3.92E-04 |
| 24h | 9.71E-05  | 2.54E-04 | 7.93E-05 | 9.15E-05 |
| 36h | 1.53E-04  | 2.19E-04 | 7.89E-05 | 2.64E-04 |
| 48h | 8.88E-05  | 9.55E-05 | 1.46E-04 | 1.19E-04 |
| 72h | 2.10E-05  | 6.03E-05 | 6.79E-05 | 2.92E-05 |
|     | cgd7_2920 |          |          |          |
| 2h  | 3.49E-05  | 5.78E-05 | 6.42E-05 | 1.53E-05 |
| 6h  | 1.09E-05  | 8.28E-05 | 5.50E-05 | 2.44E-05 |
| 12h | 7.17E-06  | 1.17E-05 | 7.78E-05 | 1.70E-05 |
| 24h | 1.26E-05  | 5.40E-05 | 1.31E-04 | 3.61E-05 |
| 36h | 4.01E-05  | 4.79E-05 | 5.07E-05 | 4.62E-05 |
| 48h | 1.77E-05  | 1.76E-05 | 7.67E-05 | 2.19E-05 |
| 72h | 5.28E-06  | 1.31E-05 | 1.61E-05 | 5.22E-06 |
|     | cgd7_2930 |          |          |          |
| 2h  | 1.68E-07  | 2.10E-07 | 2.36E-07 | 4.43E-07 |
| 6h  | 1.92E-06  | 4.26E-06 | 4.18E-06 | 3.10E-06 |
| 12h | 1.49E-07  | 9.16E-08 | 3.87E-07 | 0.00E+00 |
| 24h | 4.96E-07  | 9.30E-07 | 2.64E-06 | 3.50E-06 |
| 36h | 2.80E-05  | 1.07E-06 | 4.71E-07 | 1.12E-06 |
| 48h | 8.77E-07  | 8.41E-07 | 1.98E-06 | 2.98E-06 |
| 72h | 3.42E-07  | 5.42E-07 | 1.54E-07 | 5.31E-07 |
|     | cgd7_2950 |          |          |          |
| 2h  | 4.89E-04  | 4.99E-05 | 2.84E-07 | 4.74E-03 |
| 6h  | 5.93E-04  | 1.58E-04 | 1.06E-05 | 1.78E-02 |
| 12h | 4.32E-04  | 1.71E-04 | 6.49E-06 | 3.62E-03 |
| 24h | 6.04E-04  | 7.46E-05 | 1.93E-05 | 3.49E-04 |
| 36h | 1.48E-03  | 2.77E-04 | 1.36E-05 | 1.81E-02 |
| 48h | 9.53E-04  | 1.13E-04 | 1.12E-05 | 7.26E-03 |
| 72h | 1.12E-04  | 3.79E-05 | 6.68E-06 | 1.44E-03 |
|     | cgd7_2960 |          |          |          |
| 2h  | 1.11E-07  | 1.18E-06 | 6.59E-06 | 3.72E-07 |
| 6h  | 1.95E-06  | 1.41E-05 | 1.15E-04 | 4.54E-06 |
| 12h | 3.56E-06  | 4.86E-06 | 1.38E-05 | 1.03E-06 |
| 24h | 2.82E-06  | 2.65E-06 | 2.31E-05 | 2.74E-06 |
| 36h | 9.20E-06  | 8.39E-06 | 1.09E-05 | 4.93E-06 |
| 48h | 3.95E-06  | 2.87E-06 | 2.25E-05 | 1.81E-06 |
| 72h | 5.56E-07  | 1.80E-06 | 8.96E-07 | 6.06E-07 |
|     | cgd7_2980 |          |          |          |
| 2h  | 9.81E-06  | 0.00E+00 | 0.00E+00 | 0.00E+00 |
| 6h  | 8.70E-04  | 2.03E-04 | 1.97E-05 | 9.10E-04 |
| 12h | 2.40E-04  | 2.36E-04 | 4.72E-06 | 4.29E-04 |
| 24h | 2.40E-05  | 1.37E-04 | 7.67E-06 | 6.87E-04 |
| 36h | 7.02E-04  | 6.43E-05 | 1.83E-05 | 1.58E-03 |



|     |           |          |          |          |
|-----|-----------|----------|----------|----------|
| 48h | 1.96E-04  | 3.66E-05 | 6.53E-06 | 8.82E-04 |
| 72h | 2.20E-04  | 3.83E-05 | 2.71E-06 | 1.94E-04 |
|     | cgd7_2990 |          |          |          |
| 2h  | 8.87E-08  | 5.76E-08 | 0.00E+00 | 5.49E-08 |
| 6h  | 2.75E-08  | 2.09E-08 | 2.11E-07 | 1.42E-08 |
| 12h | 0.00E+00  | 0.00E+00 | 5.67E-08 | 0.00E+00 |
| 24h | 1.59E-09  | 4.39E-09 | 2.01E-08 | 4.30E-09 |
| 36h | 2.97E-08  | 3.33E-08 | 1.55E-08 | 2.09E-08 |
| 48h | 2.08E-07  | 7.06E-08 | 6.03E-07 | 1.39E-07 |
| 72h | 5.51E-08  | 1.19E-07 | 1.95E-07 | 5.86E-08 |
|     | cgd7_3030 |          |          |          |
| 2h  | 5.15E-06  | 9.97E-06 | 2.32E-05 | 2.87E-06 |
| 6h  | 1.22E-05  | 2.00E-05 | 3.02E-04 | 2.18E-05 |
| 12h | 1.70E-06  | 2.42E-06 | 1.51E-04 | 2.37E-06 |
| 24h | 5.70E-06  | 8.95E-06 | 2.26E-04 | 1.38E-05 |
| 36h | 9.17E-06  | 1.64E-05 | 1.04E-04 | 1.88E-05 |
| 48h | 7.74E-06  | 6.31E-06 | 1.36E-04 | 1.15E-05 |
| 72h | 1.18E-06  | 2.52E-06 | 1.49E-05 | 3.15E-07 |
|     | cgd7_3040 |          |          |          |
| 2h  | 0.00E+00  | 3.23E-08 | 3.94E-07 | 0.00E+00 |
| 6h  | 7.66E-08  | 8.39E-08 | 1.25E-06 | 2.69E-08 |
| 12h | 5.16E-07  | 4.50E-07 | 1.00E-05 | 4.40E-07 |
| 24h | 4.81E-07  | 4.97E-07 | 1.24E-06 | 2.54E-07 |
| 36h | 9.74E-07  | 4.70E-07 | 2.43E-06 | 1.58E-06 |
| 48h | 1.02E-06  | 1.41E-07 | 9.14E-06 | 1.44E-06 |
| 72h | 1.49E-07  | 5.18E-07 | 1.10E-06 | 1.85E-07 |
|     | cgd7_3050 |          |          |          |
| 2h  | 1.81E-04  | 4.86E-04 | 8.33E-06 | 3.93E-05 |
| 6h  | 3.18E-05  | 1.10E-04 | 5.15E-05 | 2.10E-05 |
| 12h | 1.77E-05  | 4.00E-05 | 7.12E-05 | 2.40E-05 |
| 24h | 3.56E-05  | 3.73E-05 | 2.82E-05 | 2.64E-05 |
| 36h | 4.94E-05  | 6.19E-05 | 2.23E-05 | 3.00E-05 |
| 48h | 5.69E-05  | 6.53E-05 | 3.50E-05 | 5.12E-05 |
| 72h | 8.56E-06  | 2.04E-05 | 3.01E-05 | 3.47E-06 |
|     | cgd7_3060 |          |          |          |
| 2h  | 9.76E-07  | 2.81E-07 | 2.28E-05 | 7.70E-07 |
| 6h  | 7.55E-07  | 4.48E-07 | 6.05E-06 | 1.26E-06 |
| 12h | 1.90E-07  | 1.02E-07 | 2.19E-06 | 2.46E-07 |
| 24h | 4.25E-07  | 1.61E-07 | 2.51E-06 | 9.10E-07 |
| 36h | 1.27E-06  | 6.45E-07 | 7.51E-06 | 1.23E-06 |
| 48h | 9.68E-07  | 4.83E-07 | 5.23E-06 | 7.99E-07 |
| 72h | 1.41E-07  | 1.81E-07 | 1.82E-06 | 2.42E-07 |
|     | cgd7_3010 |          |          |          |
| 2h  | 1.33E-02  | 7.37E-04 | 3.79E-03 | 3.11E-02 |
| 6h  | 2.27E-03  | 3.32E-04 | 1.71E-03 | 1.38E-02 |
| 12h | 7.02E-03  | 3.65E-03 | 2.14E-03 | 9.90E-03 |
| 24h | 1.86E-03  | 5.09E-04 | 8.95E-04 | 2.40E-02 |
| 36h | 1.63E-03  | 1.01E-03 | 7.63E-04 | 9.56E-03 |
| 48h | 8.30E-04  | 1.56E-03 | 7.79E-04 | 1.55E-02 |
| 72h | 5.96E-04  | 4.99E-04 | 2.79E-04 | 3.86E-03 |
|     | cgd7_3070 |          |          |          |
| 2h  | 1.09E-06  | 1.15E-06 | 3.57E-06 | 3.47E-06 |
| 6h  | 1.57E-05  | 1.11E-05 | 1.28E-04 | 2.53E-04 |

|           |          |          |          |          |
|-----------|----------|----------|----------|----------|
| 12h       | 1.56E-06 | 2.28E-06 | 1.61E-05 | 2.60E-05 |
| 24h       | 4.69E-06 | 2.66E-06 | 2.15E-05 | 5.66E-05 |
| 36h       | 8.25E-06 | 5.90E-06 | 1.66E-05 | 1.16E-05 |
| 48h       | 3.82E-06 | 3.24E-06 | 5.64E-06 | 8.02E-06 |
| 72h       | 2.52E-07 | 4.85E-07 | 6.78E-07 | 4.58E-07 |
| cgd7_3080 |          |          |          |          |
| 2h        | 0.00E+00 | 1.46E-08 | 0.00E+00 | 7.96E-08 |
| 6h        | 2.33E-08 | 1.20E-08 | 1.67E-08 | 6.72E-09 |
| 12h       | 7.98E-08 | 7.43E-08 | 3.78E-07 | 2.63E-07 |
| 24h       | 5.21E-08 | 1.77E-07 | 2.59E-06 | 5.80E-07 |
| 36h       | 2.75E-07 | 2.32E-07 | 2.60E-06 | 1.03E-06 |
| 48h       | 6.66E-07 | 3.99E-07 | 1.74E-06 | 3.66E-06 |
| 72h       | 2.82E-07 | 4.11E-07 | 3.24E-06 | 5.80E-07 |
| cgd7_3090 |          |          |          |          |
| 2h        | 5.37E-08 | 1.19E-09 | 0.00E+00 | 1.57E-08 |
| 6h        | 0.00E+00 | 0.00E+00 | 0.00E+00 | 0.00E+00 |
| 12h       | 1.26E-08 | 0.00E+00 | 1.07E-06 | 3.65E-07 |
| 24h       | 1.02E-07 | 6.52E-08 | 5.45E-07 | 3.25E-07 |
| 36h       | 2.40E-07 | 4.71E-07 | 1.52E-06 | 2.28E-06 |
| 48h       | 7.64E-07 | 3.78E-07 | 4.99E-06 | 4.34E-06 |
| 72h       | 2.42E-07 | 7.53E-07 | 6.22E-06 | 7.09E-07 |
| cgd7_3100 |          |          |          |          |
| 2h        | 4.49E-06 | 2.20E-06 | 2.94E-06 | 1.54E-06 |
| 6h        | 2.77E-06 | 2.11E-06 | 1.21E-05 | 6.16E-06 |
| 12h       | 2.16E-07 | 8.03E-07 | 3.43E-06 | 1.56E-06 |
| 24h       | 2.17E-06 | 1.02E-06 | 3.54E-06 | 3.44E-06 |
| 36h       | 1.62E-06 | 1.12E-06 | 1.46E-06 | 1.69E-06 |
| 48h       | 1.35E-06 | 8.12E-07 | 4.16E-06 | 1.43E-06 |
| 72h       | 2.26E-06 | 8.60E-07 | 7.96E-07 | 8.55E-07 |
| cgd7_3110 |          |          |          |          |
| 2h        | 2.73E-07 | 7.15E-08 | 1.34E-06 | 6.60E-07 |
| 6h        | 1.57E-06 | 1.14E-06 | 1.97E-05 | 7.19E-06 |
| 12h       | 4.03E-07 | 1.45E-07 | 4.34E-06 | 1.45E-06 |
| 24h       | 8.51E-07 | 4.27E-07 | 1.09E-05 | 5.22E-06 |
| 36h       | 2.06E-06 | 2.13E-06 | 7.30E-06 | 4.36E-06 |
| 48h       | 2.49E-06 | 9.78E-07 | 5.18E-06 | 3.48E-06 |
| 72h       | 2.02E-06 | 2.11E-06 | 7.28E-06 | 2.21E-06 |
| cgd7_3120 |          |          |          |          |
| 2h        | 7.05E-05 | 3.80E-05 | 1.98E-06 | 1.49E-05 |
| 6h        | 2.18E-07 | 1.99E-07 | 2.08E-06 | 0.00E+00 |
| 12h       | 4.99E-05 | 8.21E-05 | 1.09E-05 | 9.12E-04 |
| 24h       | 5.87E-05 | 4.65E-05 | 4.61E-06 | 1.56E-04 |
| 36h       | 5.60E-05 | 1.25E-04 | 2.03E-05 | 2.57E-04 |
| 48h       | 7.04E-04 | 2.13E-03 | 4.64E-05 | 7.70E-04 |
| 72h       | 2.97E-03 | 5.16E-03 | 1.17E-04 | 5.25E-03 |
| cgd7_3160 |          |          |          |          |
| 2h        | 2.10E-06 | 8.89E-07 | 3.48E-06 | 1.02E-06 |
| 6h        | 3.04E-07 | 5.56E-07 | 4.79E-06 | 6.98E-07 |
| 12h       | 1.12E-07 | 3.79E-07 | 7.74E-06 | 2.36E-06 |
| 24h       | 2.70E-07 | 3.02E-07 | 5.09E-06 | 1.03E-06 |
| 36h       | 5.50E-07 | 6.52E-07 | 4.76E-06 | 8.12E-07 |
| 48h       | 4.83E-07 | 3.57E-07 | 6.82E-06 | 7.49E-07 |
| 72h       | 5.48E-07 | 6.54E-07 | 3.23E-06 | 5.08E-07 |

|     |           |          |          |          |
|-----|-----------|----------|----------|----------|
|     | cgd7_3180 |          |          |          |
| 2h  | 1.38E-04  | 7.28E-05 | 1.38E-04 | 6.08E-05 |
| 6h  | 5.53E-05  | 8.15E-05 | 4.35E-04 | 3.36E-04 |
| 12h | 1.62E-05  | 1.91E-05 | 4.82E-04 | 2.07E-04 |
| 24h | 2.64E-05  | 3.59E-05 | 3.91E-04 | 2.64E-04 |
| 36h | 3.69E-05  | 4.61E-05 | 2.07E-04 | 1.13E-04 |
| 48h | 1.70E-05  | 1.46E-05 | 1.55E-04 | 5.46E-05 |
| 72h | 6.48E-06  | 5.34E-06 | 8.79E-05 | 1.58E-05 |
|     | cgd7_3190 |          |          |          |
| 2h  | 4.72E-05  | 2.34E-05 | 2.00E-04 | 8.05E-05 |
| 6h  | 4.16E-05  | 5.01E-05 | 1.17E-03 | 3.13E-04 |
| 12h | 1.43E-04  | 1.23E-04 | 9.66E-04 | 5.84E-04 |
| 24h | 4.49E-05  | 5.91E-05 | 6.29E-04 | 2.23E-04 |
| 36h | 1.63E-05  | 2.45E-05 | 8.67E-04 | 1.98E-04 |
| 48h | 3.08E-05  | 1.73E-05 | 3.18E-04 | 9.87E-05 |
| 72h | 4.96E-06  | 8.12E-06 | 1.21E-04 | 1.56E-05 |
|     | cgd7_3200 |          |          |          |
| 2h  | 7.00E-04  | 3.65E-04 | 1.00E-06 | 3.17E-04 |
| 6h  | 2.79E-04  | 1.31E-04 | 6.67E-07 | 1.20E-04 |
| 12h | 2.48E-04  | 2.03E-04 | 3.97E-06 | 4.66E-04 |
| 24h | 1.19E-04  | 1.43E-04 | 4.30E-06 | 5.51E-05 |
| 36h | 4.54E-04  | 2.12E-04 | 4.60E-06 | 8.90E-05 |
| 48h | 1.58E-04  | 3.01E-04 | 7.63E-06 | 1.21E-04 |
| 72h | 6.19E-04  | 2.09E-04 | 4.28E-06 | 4.77E-05 |
|     | cgd7_3220 |          |          |          |
| 2h  | 1.03E-06  | 1.30E-06 | 1.34E-05 | 7.35E-07 |
| 6h  | 8.58E-07  | 4.74E-07 | 6.92E-06 | 3.18E-07 |
| 12h | 2.03E-07  | 4.92E-07 | 2.02E-06 | 4.33E-07 |
| 24h | 1.70E-07  | 1.37E-07 | 2.91E-06 | 6.50E-07 |
| 36h | 9.95E-07  | 5.87E-07 | 6.59E-06 | 5.54E-07 |
| 48h | 4.26E-07  | 1.34E-07 | 1.92E-06 | 2.64E-07 |
| 72h | 2.83E-07  | 2.60E-07 | 1.37E-06 | 2.10E-07 |
|     | cgd7_3230 |          |          |          |
| 2h  | 1.49E-07  | 1.83E-07 | 7.21E-08 | 7.51E-08 |
| 6h  | 2.29E-07  | 4.80E-07 | 1.08E-07 | 1.70E-06 |
| 12h | 1.57E-08  | 9.00E-09 | 7.89E-08 | 6.11E-07 |
| 24h | 1.12E-07  | 1.09E-07 | 1.19E-07 | 3.33E-07 |
| 36h | 8.72E-08  | 8.13E-08 | 8.75E-08 | 1.57E-07 |
| 48h | 1.84E-07  | 1.80E-07 | 1.30E-07 | 1.54E-07 |
| 72h | 1.65E-08  | 2.81E-08 | 8.86E-08 | 4.51E-08 |
|     | cgd7_3250 |          |          |          |
| 2h  | 3.89E-06  | 1.55E-06 | 1.11E-06 | 3.36E-06 |
| 6h  | 4.70E-05  | 1.72E-05 | 2.58E-06 | 1.65E-05 |
| 12h | 4.19E-06  | 9.45E-06 | 4.51E-06 | 1.88E-05 |
| 24h | 2.10E-05  | 1.01E-05 | 4.12E-06 | 4.18E-05 |
| 36h | 4.19E-06  | 3.42E-06 | 2.16E-06 | 4.48E-06 |
| 48h | 1.06E-05  | 3.23E-06 | 3.43E-06 | 2.27E-05 |
| 72h | 2.88E-06  | 3.72E-06 | 2.77E-06 | 4.96E-05 |
|     | cgd7_3270 |          |          |          |
| 2h  | 4.70E-05  | 1.24E-05 | 6.13E-06 | 1.66E-05 |
| 6h  | 2.62E-05  | 2.02E-05 | 1.10E-05 | 1.87E-05 |
| 12h | 8.15E-06  | 5.61E-06 | 1.83E-05 | 1.58E-05 |
| 24h | 1.99E-05  | 1.44E-05 | 1.11E-05 | 8.42E-06 |

|     |           |          |          |          |
|-----|-----------|----------|----------|----------|
| 36h | 3.85E-06  | 5.01E-06 | 4.47E-06 | 6.63E-06 |
| 48h | 5.73E-06  | 1.53E-06 | 2.34E-06 | 4.43E-06 |
| 72h | 1.05E-06  | 7.12E-07 | 1.07E-06 | 1.27E-06 |
|     | cgd7_3280 |          |          |          |
| 2h  | 1.24E-06  | 2.78E-07 | 1.21E-07 | 5.98E-07 |
| 6h  | 4.21E-06  | 2.71E-06 | 1.17E-06 | 2.16E-06 |
| 12h | 1.45E-07  | 2.15E-07 | 3.83E-07 | 1.64E-07 |
| 24h | 4.26E-07  | 4.51E-07 | 6.33E-07 | 5.82E-07 |
| 36h | 2.73E-07  | 2.70E-07 | 3.04E-07 | 3.15E-07 |
| 48h | 2.91E-07  | 1.31E-07 | 1.23E-07 | 5.50E-07 |
| 72h | 4.10E-08  | 1.15E-07 | 9.39E-08 | 6.19E-08 |
|     | cgd7_3290 |          |          |          |
| 2h  | 3.00E-04  | 9.28E-05 | 7.66E-04 | 1.22E-04 |
| 6h  | 2.25E-04  | 3.76E-04 | 2.44E-03 | 1.33E-04 |
| 12h | 2.57E-04  | 1.15E-04 | 2.84E-03 | 1.90E-04 |
| 24h | 1.58E-04  | 2.57E-04 | 7.75E-04 | 1.13E-04 |
| 36h | 4.11E-05  | 8.94E-05 | 7.49E-04 | 1.03E-04 |
| 48h | 7.61E-05  | 5.35E-05 | 2.17E-04 | 6.02E-05 |
| 72h | 5.39E-05  | 6.59E-05 | 2.59E-04 | 9.69E-06 |
|     | cgd7_3320 |          |          |          |
| 2h  | 9.32E-06  | 8.40E-07 | 1.83E-06 | 5.05E-06 |
| 6h  | 6.16E-07  | 1.32E-06 | 5.87E-08 | 4.09E-06 |
| 12h | 3.95E-05  | 5.23E-05 | 6.00E-06 | 8.02E-05 |
| 24h | 5.85E-06  | 1.83E-05 | 3.38E-06 | 1.92E-05 |
| 36h | 3.70E-06  | 3.36E-06 | 1.11E-05 | 2.11E-05 |
| 48h | 3.07E-06  | 4.86E-06 | 3.53E-06 | 1.96E-05 |
| 72h | 3.50E-06  | 3.24E-06 | 2.30E-06 | 7.39E-06 |
|     | cgd7_3340 |          |          |          |
| 2h  | 0.00E+00  | 5.11E-09 | 0.00E+00 | 0.00E+00 |
| 6h  | 1.45E-08  | 6.96E-09 | 0.00E+00 | 0.00E+00 |
| 12h | 1.14E-05  | 7.07E-06 | 8.26E-06 | 1.52E-05 |
| 24h | 9.96E-07  | 2.12E-06 | 4.33E-07 | 1.41E-06 |
| 36h | 5.57E-07  | 6.15E-07 | 5.01E-06 | 8.77E-06 |
| 48h | 3.98E-07  | 3.62E-07 | 3.38E-07 | 1.72E-06 |
| 72h | 1.34E-07  | 5.40E-07 | 4.57E-07 | 9.05E-07 |
|     | cgd7_3350 |          |          |          |
| 2h  | 5.72E-04  | 4.37E-05 | 0.00E+00 | 6.89E-05 |
| 6h  | 3.37E-04  | 2.65E-04 | 5.46E-04 | 1.57E-05 |
| 12h | 2.27E-04  | 2.62E-04 | 8.75E-04 | 3.11E-05 |
| 24h | 2.09E-04  | 2.67E-04 | 9.30E-04 | 1.19E-04 |
| 36h | 2.03E-04  | 2.22E-04 | 1.09E-03 | 1.08E-04 |
| 48h | 1.04E-04  | 1.48E-04 | 2.34E-04 | 1.61E-05 |
| 72h | 1.27E-04  | 1.88E-04 | 5.05E-04 | 4.61E-05 |
|     | cgd7_3360 |          |          |          |
| 2h  | 2.87E-07  | 2.59E-06 | 1.29E-07 | 2.63E-06 |
| 6h  | 2.61E-07  | 3.40E-06 | 1.07E-06 | 9.24E-06 |
| 12h | 1.39E-05  | 0.00E+00 | 6.39E-07 | 3.42E-05 |
| 24h | 2.02E-05  | 3.90E-05 | 2.06E-05 | 2.83E-06 |
| 36h | 2.27E-05  | 1.26E-04 | 1.33E-05 | 9.74E-06 |
| 48h | 7.86E-05  | 5.35E-05 | 2.61E-05 | 2.49E-05 |
| 72h | 7.60E-05  | 1.14E-04 | 2.13E-06 | 2.37E-05 |
|     | cgd7_3370 |          |          |          |
| 2h  | 9.71E-08  | 5.67E-09 | 0.00E+00 | 6.45E-08 |

|           |          |          |          |          |
|-----------|----------|----------|----------|----------|
| 6h        | 0.00E+00 | 2.79E-09 | 1.39E-09 | 4.13E-08 |
| 12h       | 1.82E-08 | 4.83E-09 | 1.14E-08 | 5.95E-07 |
| 24h       | 1.07E-08 | 2.48E-08 | 4.23E-08 | 4.82E-08 |
| 36h       | 1.76E-08 | 2.51E-08 | 4.65E-08 | 8.44E-08 |
| 48h       | 5.90E-08 | 5.48E-08 | 9.20E-08 | 1.93E-07 |
| 72h       | 7.30E-08 | 7.91E-08 | 1.29E-07 | 7.30E-07 |
| cgd7_3380 |          |          |          |          |
| 2h        | 3.86E-08 | 7.32E-09 | 0.00E+00 | 0.00E+00 |
| 6h        | 0.00E+00 | 0.00E+00 | 0.00E+00 | 0.00E+00 |
| 12h       | 4.43E-07 | 1.49E-07 | 2.45E-07 | 3.79E-07 |
| 24h       | 4.38E-08 | 3.87E-08 | 3.82E-08 | 1.81E-07 |
| 36h       | 5.65E-08 | 1.43E-07 | 2.26E-07 | 1.27E-06 |
| 48h       | 1.39E-06 | 1.55E-06 | 8.91E-07 | 2.64E-06 |
| 72h       | 4.52E-07 | 1.61E-07 | 5.16E-07 | 1.37E-06 |
| cgd7_3390 |          |          |          |          |
| 2h        | 1.78E-06 | 1.19E-06 | 1.85E-07 | 6.09E-06 |
| 6h        | 1.44E-06 | 7.83E-07 | 7.53E-07 | 2.38E-06 |
| 12h       | 2.30E-06 | 4.07E-06 | 7.36E-06 | 6.36E-06 |
| 24h       | 9.37E-07 | 1.06E-06 | 8.64E-07 | 1.39E-06 |
| 36h       | 3.68E-07 | 6.35E-07 | 1.50E-06 | 4.95E-06 |
| 48h       | 2.61E-07 | 2.90E-07 | 4.90E-07 | 8.92E-07 |
| 72h       | 1.76E-07 | 2.71E-07 | 4.29E-07 | 1.04E-06 |
| cgd7_3400 |          |          |          |          |
| 2h        | 4.31E-07 | 1.23E-07 | 0.00E+00 | 4.98E-08 |
| 6h        | 2.67E-08 | 1.50E-08 | 7.56E-08 | 4.24E-07 |
| 12h       | 1.81E-06 | 5.71E-07 | 5.06E-07 | 1.53E-06 |
| 24h       | 1.47E-06 | 3.60E-07 | 5.16E-07 | 6.87E-07 |
| 36h       | 2.81E-06 | 2.36E-07 | 9.37E-07 | 1.86E-06 |
| 48h       | 2.37E-06 | 1.14E-06 | 7.13E-07 | 1.27E-06 |
| 72h       | 2.49E-06 | 5.00E-07 | 8.81E-07 | 7.71E-07 |
| cgd7_3420 |          |          |          |          |
| 2h        | 1.74E-04 | 1.93E-05 | 9.33E-05 | 5.32E-04 |
| 6h        | 1.47E-05 | 8.33E-05 | 9.90E-05 | 8.41E-05 |
| 12h       | 5.29E-06 | 3.41E-05 | 7.44E-05 | 1.98E-04 |
| 24h       | 2.81E-04 | 6.11E-05 | 2.08E-05 | 8.00E-05 |
| 36h       | 7.73E-06 | 1.94E-05 | 2.80E-05 | 1.22E-04 |
| 48h       | 3.57E-05 | 2.61E-05 | 6.53E-05 | 2.67E-04 |
| 72h       | 2.84E-05 | 2.50E-05 | 3.42E-05 | 1.48E-04 |
| cgd7_3450 |          |          |          |          |
| 2h        | 5.35E-05 | 1.04E-03 | 3.91E-04 | 1.58E-03 |
| 6h        | 2.29E-04 | 1.67E-03 | 8.17E-04 | 2.71E-03 |
| 12h       | 6.63E-06 | 7.17E-05 | 4.66E-04 | 1.92E-04 |
| 24h       | 2.57E-05 | 4.89E-04 | 3.92E-04 | 6.75E-04 |
| 36h       | 3.81E-05 | 1.04E-04 | 1.06E-04 | 1.02E-03 |
| 48h       | 6.49E-05 | 1.48E-04 | 2.21E-04 | 6.03E-05 |
| 72h       | 2.19E-05 | 1.70E-04 | 1.05E-04 | 1.39E-04 |
| cgd7_3460 |          |          |          |          |
| 2h        | 1.49E-06 | 9.30E-08 | 3.73E-08 | 3.68E-07 |
| 6h        | 9.50E-07 | 6.35E-07 | 4.21E-07 | 5.70E-07 |
| 12h       | 5.26E-08 | 5.54E-08 | 1.76E-07 | 2.45E-07 |
| 24h       | 3.52E-07 | 1.33E-07 | 3.49E-07 | 2.68E-07 |
| 36h       | 4.21E-07 | 9.66E-08 | 2.91E-07 | 7.57E-07 |
| 48h       | 9.56E-07 | 1.41E-07 | 1.60E-07 | 2.64E-07 |

|     |           |          |          |          |
|-----|-----------|----------|----------|----------|
| 72h | 2.72E-07  | 9.32E-08 | 8.89E-08 | 2.13E-07 |
|     | cgd7_3470 |          |          |          |
| 2h  | 1.03E-05  | 8.21E-05 | 0.00E+00 | 1.12E-05 |
| 6h  | 4.21E-06  | 1.10E-04 | 3.63E-05 | 6.15E-05 |
| 12h | 8.37E-06  | 2.73E-05 | 1.69E-05 | 1.33E-04 |
| 24h | 5.54E-06  | 6.85E-05 | 2.78E-05 | 1.71E-05 |
| 36h | 1.01E-05  | 4.92E-05 | 2.30E-05 | 5.61E-05 |
| 48h | 1.38E-05  | 2.74E-05 | 2.81E-05 | 9.81E-04 |
| 72h | 5.09E-06  | 2.11E-05 | 9.79E-06 | 6.50E-04 |
|     | cgd7_3480 |          |          |          |
| 2h  | 2.80E-06  | 7.21E-07 | 2.57E-06 | 6.26E-06 |
| 6h  | 1.82E-06  | 4.49E-06 | 3.62E-06 | 5.27E-06 |
| 12h | 7.76E-07  | 2.51E-07 | 2.67E-06 | 1.39E-06 |
| 24h | 4.17E-06  | 3.37E-06 | 2.94E-06 | 2.12E-06 |
| 36h | 1.34E-06  | 6.31E-07 | 7.50E-07 | 2.16E-06 |
| 48h | 2.61E-06  | 6.93E-07 | 8.48E-07 | 1.49E-06 |
| 72h | 2.44E-06  | 2.44E-07 | 2.78E-07 | 2.80E-07 |
|     | cgd7_3490 |          |          |          |
| 2h  | 1.44E-04  | 3.54E-05 | 3.93E-05 | 1.29E-04 |
| 6h  | 1.87E-05  | 3.53E-05 | 1.94E-05 | 4.94E-05 |
| 12h | 2.37E-05  | 1.30E-05 | 4.55E-05 | 4.16E-05 |
| 24h | 8.47E-05  | 4.26E-05 | 1.21E-05 | 1.34E-05 |
| 36h | 3.97E-05  | 8.41E-06 | 6.85E-06 | 2.26E-05 |
| 48h | 6.32E-05  | 1.52E-05 | 1.17E-05 | 2.30E-05 |
| 72h | 5.90E-05  | 6.37E-06 | 2.01E-04 | 3.25E-06 |
|     | cgd7_3510 |          |          |          |
| 2h  | 7.58E-05  | 8.95E-06 | 9.89E-06 | 5.43E-05 |
| 6h  | 1.81E-05  | 4.03E-05 | 1.10E-05 | 2.28E-05 |
| 12h | 5.58E-05  | 1.04E-05 | 1.57E-05 | 1.83E-05 |
| 24h | 4.57E-05  | 1.62E-05 | 1.18E-05 | 1.30E-05 |
| 36h | 7.76E-05  | 1.13E-05 | 1.43E-05 | 2.86E-05 |
| 48h | 1.58E-04  | 1.86E-05 | 2.38E-05 | 4.94E-05 |
| 72h | 1.02E-04  | 1.08E-05 | 9.70E-06 | 1.17E-05 |
|     | cgd7_3540 |          |          |          |
| 2h  | 6.53E-04  | 3.37E-04 | 6.59E-05 | 2.67E-04 |
| 6h  | 2.70E-04  | 1.03E-04 | 5.98E-05 | 9.43E-05 |
| 12h | 7.33E-05  | 3.54E-05 | 9.87E-05 | 7.73E-05 |
| 24h | 1.62E-04  | 4.81E-05 | 6.98E-05 | 6.40E-05 |
| 36h | 1.24E-04  | 2.13E-05 | 2.20E-05 | 7.29E-05 |
| 48h | 1.20E-04  | 3.09E-05 | 2.44E-05 | 6.18E-05 |
| 72h | 2.18E-04  | 2.95E-05 | 7.79E-06 | 1.64E-05 |
|     | cgd7_3560 |          |          |          |
| 2h  | 9.94E-08  | 4.40E-08 | 3.26E-08 | 2.25E-07 |
| 6h  | 6.56E-08  | 1.33E-07 | 2.15E-08 | 3.85E-08 |
| 12h | 1.08E-07  | 6.02E-09 | 4.94E-08 | 2.88E-08 |
| 24h | 1.21E-07  | 2.13E-07 | 6.32E-08 | 6.31E-08 |
| 36h | 1.02E-07  | 3.99E-08 | 7.60E-08 | 2.60E-07 |
| 48h | 5.51E-07  | 5.28E-08 | 9.02E-08 | 1.41E-07 |
| 72h | 8.65E-08  | 2.47E-08 | 1.96E-08 | 3.07E-08 |
|     | cgd7_3580 |          |          |          |
| 2h  | 2.11E-05  | 2.51E-05 | 1.19E-05 | 2.44E-05 |
| 6h  | 3.91E-06  | 2.93E-06 | 9.68E-07 | 1.77E-06 |
| 12h | 1.76E-06  | 2.55E-06 | 3.87E-06 | 3.55E-06 |

|     |           |          |          |          |
|-----|-----------|----------|----------|----------|
| 24h | 1.04E-05  | 4.24E-06 | 1.70E-06 | 1.73E-06 |
| 36h | 7.34E-06  | 3.20E-06 | 1.91E-06 | 3.03E-06 |
| 48h | 4.29E-06  | 1.02E-06 | 7.61E-07 | 2.30E-06 |
| 72h | 3.17E-06  | 9.82E-07 | 8.01E-07 | 1.44E-06 |
|     | cgd7_3780 |          |          |          |
| 2h  | 4.27E-05  | 1.28E-04 | 4.14E-05 | 9.06E-05 |
| 6h  | 5.47E-05  | 4.01E-05 | 5.47E-05 | 5.27E-05 |
| 12h | 4.83E-05  | 6.29E-05 | 1.20E-04 | 6.73E-05 |
| 24h | 3.53E-05  | 5.90E-05 | 4.96E-05 | 3.98E-05 |
| 36h | 1.87E-05  | 2.21E-05 | 3.55E-05 | 2.93E-05 |
| 48h | 1.06E-05  | 6.67E-06 | 1.05E-05 | 1.81E-05 |
| 72h | 6.35E-06  | 7.35E-06 | 7.36E-06 | 1.37E-05 |
|     | cgd7_3790 |          |          |          |
| 2h  | 9.95E-08  | 7.38E-08 | 8.82E-08 | 2.74E-07 |
| 6h  | 1.87E-08  | 2.99E-09 | 1.78E-08 | 5.86E-09 |
| 12h | 3.24E-04  | 3.41E-04 | 3.19E-04 | 1.58E-04 |
| 24h | 3.94E-05  | 4.13E-05 | 2.79E-05 | 1.09E-05 |
| 36h | 7.66E-06  | 1.02E-05 | 7.22E-05 | 4.25E-05 |
| 48h | 2.95E-06  | 2.02E-06 | 5.70E-06 | 2.66E-06 |
| 72h | 1.03E-06  | 9.03E-07 | 9.32E-07 | 1.33E-06 |
|     | cgd7_3800 |          |          |          |
| 2h  | 2.41E-07  | 1.44E-07 | 2.97E-07 | 1.45E-06 |
| 6h  | 3.80E-06  | 2.31E-06 | 1.32E-06 | 1.35E-06 |
| 12h | 2.63E-06  | 4.26E-06 | 5.20E-06 | 1.42E-06 |
| 24h | 1.07E-06  | 1.56E-06 | 9.29E-07 | 8.25E-07 |
| 36h | 2.70E-07  | 3.41E-07 | 9.60E-07 | 5.96E-07 |
| 48h | 4.30E-07  | 2.45E-07 | 5.10E-07 | 3.25E-07 |
| 72h | 1.00E-07  | 8.79E-08 | 1.02E-07 | 1.02E-07 |
|     | cgd7_3810 |          |          |          |
| 2h  | 2.25E-05  | 1.73E-04 | 1.97E-05 | 1.05E-04 |
| 6h  | 3.14E-05  | 1.70E-04 | 1.89E-04 | 6.55E-05 |
| 12h | 3.31E-04  | 4.43E-04 | 5.34E-04 | 3.22E-04 |
| 24h | 1.23E-04  | 2.58E-04 | 3.38E-04 | 1.17E-04 |
| 36h | 2.70E-04  | 2.67E-04 | 4.79E-04 | 2.50E-04 |
| 48h | 2.33E-04  | 1.23E-04 | 4.75E-04 | 8.27E-05 |
| 72h | 1.67E-04  | 1.62E-04 | 7.21E-05 | 3.66E-05 |
|     | cgd7_3820 |          |          |          |
| 2h  | 2.16E-09  | 0.00E+00 | 0.00E+00 | 0.00E+00 |
| 6h  | 0.00E+00  | 3.11E-09 | 0.00E+00 | 0.00E+00 |
| 12h | 1.40E-07  | 2.90E-07 | 1.41E-07 | 1.05E-07 |
| 24h | 4.22E-08  | 3.04E-08 | 4.30E-08 | 3.82E-08 |
| 36h | 9.76E-08  | 8.47E-08 | 3.37E-07 | 2.01E-07 |
| 48h | 1.21E-07  | 7.37E-08 | 1.23E-07 | 8.08E-08 |
| 72h | 7.55E-08  | 1.21E-07 | 7.95E-08 | 5.17E-08 |
|     | cgd7_3830 |          |          |          |
| 2h  | 1.75E-09  | 1.55E-08 | 4.85E-09 | 4.10E-08 |
| 6h  | 2.04E-07  | 1.03E-07 | 3.34E-08 | 1.60E-07 |
| 12h | 9.92E-06  | 1.48E-05 | 9.06E-06 | 4.59E-06 |
| 24h | 6.78E-07  | 1.02E-06 | 2.58E-07 | 2.98E-07 |
| 36h | 2.24E-07  | 3.51E-07 | 1.47E-06 | 9.39E-07 |
| 48h | 1.15E-07  | 1.29E-07 | 2.39E-07 | 2.00E-07 |
| 72h | 5.98E-07  | 1.64E-07 | 1.71E-07 | 1.10E-07 |
|     | cgd7_3840 |          |          |          |

|     |           |          |          |          |
|-----|-----------|----------|----------|----------|
| 2h  | 4.80E-07  | 4.06E-07 | 3.64E-07 | 9.54E-07 |
| 6h  | 1.06E-06  | 4.18E-07 | 5.34E-07 | 1.56E-06 |
| 12h | 8.46E-06  | 6.21E-06 | 1.07E-05 | 1.71E-05 |
| 24h | 1.09E-06  | 9.12E-07 | 7.82E-07 | 2.05E-06 |
| 36h | 2.51E-07  | 3.70E-07 | 2.41E-06 | 1.19E-05 |
| 48h | 3.78E-07  | 2.88E-07 | 1.45E-06 | 5.52E-06 |
| 72h | 1.51E-07  | 3.36E-07 | 1.19E-06 | 6.83E-05 |
|     | cgd7_3850 |          |          |          |
| 2h  | 1.94E-09  | 3.51E-09 | 1.74E-08 | 0.00E+00 |
| 6h  | 0.00E+00  | 0.00E+00 | 0.00E+00 | 0.00E+00 |
| 12h | 1.71E-06  | 1.42E-06 | 1.42E-06 | 1.00E-06 |
| 24h | 2.94E-07  | 2.77E-07 | 1.92E-07 | 1.76E-07 |
| 36h | 1.44E-07  | 2.01E-07 | 7.59E-07 | 3.30E-07 |
| 48h | 3.89E-08  | 3.19E-08 | 1.12E-07 | 9.38E-08 |
| 72h | 3.70E-08  | 3.84E-08 | 1.99E-08 | 1.19E-08 |
|     | cgd7_3860 |          |          |          |
| 2h  | 0.00E+00  | 0.00E+00 | 0.00E+00 | 0.00E+00 |
| 6h  | 0.00E+00  | 0.00E+00 | 0.00E+00 | 0.00E+00 |
| 12h | 1.12E-06  | 9.75E-07 | 2.06E-06 | 8.62E-07 |
| 24h | 3.02E-07  | 1.19E-06 | 5.32E-07 | 3.73E-07 |
| 36h | 4.63E-07  | 6.58E-07 | 1.94E-06 | 1.28E-06 |
| 48h | 4.62E-07  | 2.56E-07 | 6.31E-07 | 5.34E-07 |
| 72h | 3.09E-07  | 1.96E-07 | 7.73E-07 | 6.03E-07 |
|     | cgd7_3870 |          |          |          |
| 2h  | 0.00E+00  | 0.00E+00 | 0.00E+00 | 0.00E+00 |
| 6h  | 0.00E+00  | 0.00E+00 | 0.00E+00 | 0.00E+00 |
| 12h | 1.41E-03  | 9.98E-04 | 2.00E-03 | 8.52E-05 |
| 24h | 3.17E-04  | 1.30E-04 | 3.61E-04 | 2.62E-04 |
| 36h | 2.81E-04  | 2.22E-04 | 8.64E-04 | 3.29E-04 |
| 48h | 2.40E-04  | 2.95E-04 | 3.73E-04 | 3.72E-04 |
| 72h | 2.02E-05  | 5.85E-05 | 9.62E-05 | 5.37E-04 |
|     | cgd7_3880 |          |          |          |
| 2h  | 2.57E-04  | 2.48E-04 | 0.00E+00 | 6.43E-04 |
| 6h  | 3.91E-03  | 7.32E-03 | 8.70E-03 | 3.95E-03 |
| 12h | 3.83E-04  | 9.46E-04 | 1.44E-03 | 1.87E-03 |
| 24h | 5.83E-04  | 3.33E-04 | 6.96E-04 | 6.27E-04 |
| 36h | 5.78E-04  | 5.74E-04 | 9.42E-04 | 2.57E-04 |
| 48h | 1.98E-04  | 2.77E-04 | 4.06E-04 | 5.01E-04 |
| 72h | 1.35E-04  | 3.98E-04 | 1.76E-04 | 6.64E-05 |
|     | cgd7_3900 |          |          |          |
| 2h  | 7.39E-07  | 3.61E-07 | 3.43E-07 | 7.93E-07 |
| 6h  | 1.09E-06  | 1.49E-06 | 5.65E-07 | 8.69E-07 |
| 12h | 1.03E-07  | 1.93E-07 | 3.14E-07 | 1.05E-07 |
| 24h | 7.91E-08  | 1.08E-07 | 2.62E-07 | 7.79E-07 |
| 36h | 3.38E-07  | 5.99E-07 | 1.06E-06 | 3.01E-07 |
| 48h | 1.56E-07  | 1.40E-07 | 2.65E-07 | 2.39E-07 |
| 72h | 1.33E-07  | 2.45E-07 | 2.49E-07 | 2.52E-07 |
|     | cgd7_3590 |          |          |          |
| 2h  | 1.09E-05  | 6.03E-06 | 1.64E-05 | 4.21E-05 |
| 6h  | 1.91E-06  | 1.26E-06 | 5.88E-06 | 5.73E-06 |
| 12h | 3.25E-06  | 2.28E-06 | 2.10E-05 | 5.15E-06 |
| 24h | 6.57E-06  | 4.44E-06 | 5.71E-06 | 3.72E-06 |
| 36h | 2.17E-06  | 1.68E-06 | 2.61E-06 | 3.15E-06 |



|     |           |          |          |          |
|-----|-----------|----------|----------|----------|
| 48h | 1.21E-06  | 2.13E-06 | 2.09E-06 | 2.65E-06 |
| 72h | 9.39E-07  | 1.07E-06 | 1.76E-06 | 1.02E-06 |
|     | cgd7_3600 |          |          |          |
| 2h  | 6.64E-08  | 2.91E-08 | 0.00E+00 | 4.70E-09 |
| 6h  | 2.02E-06  | 5.78E-07 | 7.19E-07 | 1.02E-06 |
| 12h | 1.42E-08  | 0.00E+00 | 1.35E-08 | 7.01E-08 |
| 24h | 4.57E-07  | 8.88E-08 | 9.28E-07 | 3.99E-07 |
| 36h | 1.32E-07  | 1.96E-07 | 2.58E-07 | 3.41E-07 |
| 48h | 2.47E-07  | 1.19E-07 | 1.79E-07 | 2.24E-07 |
| 72h | 5.27E-08  | 3.51E-08 | 1.70E-07 | 8.70E-08 |
|     | cgd7_3620 |          |          |          |
| 2h  | 3.47E-06  | 6.00E-07 | 1.40E-05 | 2.89E-05 |
| 6h  | 1.43E-05  | 1.04E-05 | 6.22E-06 | 2.39E-05 |
| 12h | 1.60E-06  | 1.77E-06 | 1.64E-05 | 4.49E-06 |
| 24h | 7.74E-06  | 1.06E-06 | 1.66E-05 | 6.61E-06 |
| 36h | 6.05E-06  | 2.63E-06 | 6.04E-06 | 1.65E-05 |
| 48h | 1.40E-05  | 2.49E-06 | 2.13E-05 | 1.35E-05 |
| 72h | 4.83E-06  | 6.61E-07 | 1.11E-05 | 8.23E-06 |
|     | cgd7_3630 |          |          |          |
| 2h  | 1.74E-06  | 3.23E-07 | 2.26E-06 | 1.32E-05 |
| 6h  | 1.44E-06  | 9.45E-08 | 1.25E-06 | 6.92E-07 |
| 12h | 1.73E-06  | 1.46E-06 | 8.44E-06 | 2.98E-06 |
| 24h | 1.64E-06  | 4.85E-07 | 5.24E-06 | 1.39E-06 |
| 36h | 2.00E-06  | 7.44E-07 | 6.38E-06 | 3.39E-06 |
| 48h | 1.70E-06  | 6.41E-07 | 1.91E-05 | 4.35E-06 |
| 72h | 1.11E-06  | 1.25E-06 | 3.41E-06 | 2.25E-06 |
|     | cgd7_3640 |          |          |          |
| 2h  | 1.21E-07  | 8.09E-08 | 2.56E-07 | 1.21E-07 |
| 6h  | 9.56E-08  | 9.21E-08 | 2.21E-07 | 1.34E-07 |
| 12h | 1.69E-07  | 1.22E-07 | 4.25E-07 | 2.05E-07 |
| 24h | 8.08E-08  | 1.20E-07 | 2.02E-07 | 2.10E-07 |
| 36h | 1.38E-07  | 1.36E-07 | 1.44E-07 | 2.99E-07 |
| 48h | 8.86E-08  | 6.60E-08 | 1.75E-07 | 1.83E-07 |
| 72h | 1.20E-07  | 5.82E-08 | 6.03E-08 | 1.35E-07 |
|     | cgd7_3650 |          |          |          |
| 2h  | 5.48E-06  | 2.25E-06 | 1.17E-05 | 1.75E-05 |
| 6h  | 1.36E-06  | 2.94E-07 | 1.32E-06 | 1.61E-06 |
| 12h | 1.55E-05  | 2.15E-06 | 1.57E-05 | 4.59E-06 |
| 24h | 4.83E-06  | 1.53E-06 | 8.16E-06 | 5.46E-06 |
| 36h | 3.86E-06  | 2.38E-06 | 2.03E-06 | 4.09E-06 |
| 48h | 1.92E-06  | 1.21E-06 | 5.75E-06 | 2.49E-06 |
| 72h | 1.09E-06  | 8.03E-07 | 2.61E-06 | 1.55E-06 |
|     | cgd7_3660 |          |          |          |
| 2h  | 1.65E-07  | 5.25E-08 | 4.90E-06 | 3.51E-06 |
| 6h  | 4.45E-04  | 3.88E-05 | 3.50E-05 | 3.58E-04 |
| 12h | 1.50E-05  | 1.94E-06 | 3.23E-05 | 4.89E-06 |
| 24h | 2.00E-05  | 6.34E-06 | 4.06E-05 | 8.06E-05 |
| 36h | 8.65E-05  | 1.90E-05 | 2.78E-05 | 6.44E-05 |
| 48h | 5.53E-05  | 9.78E-06 | 1.01E-04 | 9.14E-05 |
| 72h | 2.50E-05  | 9.59E-06 | 1.70E-05 | 2.24E-05 |
|     | cgd7_3670 |          |          |          |
| 2h  | 0.00E+00  | 8.37E-08 | 0.00E+00 | 6.99E-05 |
| 6h  | 1.39E-02  | 3.94E-03 | 6.31E-04 | 3.43E-02 |

|           |          |          |          |          |
|-----------|----------|----------|----------|----------|
| 12h       | 1.36E-03 | 8.36E-04 | 1.58E-04 | 5.69E-03 |
| 24h       | 1.33E-03 | 6.41E-04 | 5.20E-04 | 1.22E-02 |
| 36h       | 3.86E-03 | 1.50E-03 | 2.06E-04 | 8.67E-03 |
| 48h       | 2.14E-03 | 7.79E-04 | 1.52E-04 | 6.09E-03 |
| 72h       | 3.62E-04 | 8.84E-05 | 5.45E-05 | 2.10E-04 |
| cgd7_3680 |          |          |          |          |
| 2h        | 1.53E-08 | 0.00E+00 | 0.00E+00 | 0.00E+00 |
| 6h        | 1.52E-07 | 4.10E-07 | 1.78E-06 | 6.33E-07 |
| 12h       | 1.37E-07 | 9.83E-08 | 2.49E-06 | 2.60E-07 |
| 24h       | 5.64E-07 | 3.01E-07 | 3.77E-06 | 1.53E-06 |
| 36h       | 8.59E-07 | 1.67E-06 | 9.37E-06 | 3.11E-06 |
| 48h       | 2.71E-06 | 1.32E-06 | 4.91E-06 | 3.97E-06 |
| 72h       | 1.76E-06 | 1.12E-06 | 3.30E-06 | 1.85E-06 |
| cgd7_3710 |          |          |          |          |
| 2h        | 0.00E+00 | 2.87E-07 | 0.00E+00 | 7.80E-05 |
| 6h        | 1.24E-04 | 2.43E-05 | 1.10E-05 | 4.48E-04 |
| 12h       | 0.00E+00 | 2.24E-07 | 6.43E-06 | 9.37E-06 |
| 24h       | 3.65E-05 | 3.53E-06 | 2.70E-06 | 6.75E-04 |
| 36h       | 1.82E-05 | 3.58E-05 | 1.61E-06 | 2.23E-04 |
| 48h       | 2.82E-05 | 1.29E-05 | 1.80E-06 | 3.58E-04 |
| 72h       | 2.68E-05 | 5.06E-05 | 4.30E-06 | 2.82E-04 |
| cgd7_3730 |          |          |          |          |
| 2h        | 5.54E-06 | 4.94E-07 | 8.73E-06 | 1.04E-06 |
| 6h        | 5.75E-07 | 3.54E-07 | 1.46E-06 | 5.98E-07 |
| 12h       | 2.17E-08 | 4.80E-08 | 9.11E-07 | 3.01E-08 |
| 24h       | 7.87E-08 | 2.91E-08 | 9.11E-07 | 3.82E-07 |
| 36h       | 9.87E-08 | 2.83E-07 | 1.61E-06 | 4.46E-07 |
| 48h       | 3.45E-07 | 2.70E-07 | 2.43E-05 | 1.08E-06 |
| 72h       | 2.29E-07 | 1.40E-07 | 7.05E-07 | 1.45E-07 |
| cgd7_3750 |          |          |          |          |
| 2h        | 1.46E-04 | 5.59E-06 | 4.33E-06 | 8.90E-05 |
| 6h        | 7.14E-05 | 3.18E-05 | 8.02E-05 | 9.17E-05 |
| 12h       | 1.26E-05 | 1.37E-06 | 1.72E-06 | 4.67E-06 |
| 24h       | 6.71E-05 | 3.81E-06 | 2.87E-05 | 3.91E-05 |
| 36h       | 4.13E-05 | 2.13E-05 | 7.28E-06 | 4.49E-05 |
| 48h       | 4.74E-05 | 5.84E-06 | 1.45E-05 | 4.84E-05 |
| 72h       | 1.20E-05 | 4.43E-06 | 3.89E-06 | 2.98E-05 |
| cgd7_3760 |          |          |          |          |
| 2h        | 1.95E-07 | 1.04E-07 | 1.04E-07 | 2.27E-07 |
| 6h        | 4.29E-09 | 8.81E-08 | 7.13E-09 | 2.48E-08 |
| 12h       | 2.56E-09 | 1.79E-08 | 4.23E-08 | 2.16E-08 |
| 24h       | 2.86E-08 | 1.46E-08 | 7.07E-08 | 2.10E-08 |
| 36h       | 5.26E-08 | 6.59E-08 | 1.05E-07 | 1.40E-07 |
| 48h       | 4.27E-07 | 1.50E-07 | 4.24E-07 | 3.57E-07 |
| 72h       | 2.46E-07 | 1.46E-07 | 7.06E-07 | 3.74E-07 |
| cgd7_3770 |          |          |          |          |
| 2h        | 1.69E-06 | 7.62E-06 | 5.02E-07 | 9.17E-06 |
| 6h        | 5.93E-06 | 4.79E-05 | 6.79E-06 | 1.02E-05 |
| 12h       | 1.36E-06 | 3.70E-06 | 1.02E-06 | 8.96E-07 |
| 24h       | 1.96E-06 | 6.63E-06 | 8.89E-06 | 5.84E-06 |
| 36h       | 2.52E-06 | 7.78E-06 | 2.15E-06 | 3.11E-06 |
| 48h       | 1.39E-05 | 2.65E-05 | 2.26E-05 | 1.63E-05 |
| 72h       | 5.80E-06 | 1.53E-05 | 7.50E-06 | 9.74E-06 |

|     |           |          |          |          |
|-----|-----------|----------|----------|----------|
|     | cgd8_4800 |          |          |          |
| 2h  | 3.52E-03  | 3.77E-06 | 0.00E+00 | 4.32E-04 |
| 6h  | 1.01E-03  | 1.00E-05 | 8.99E-04 | 9.16E-05 |
| 12h | 2.23E-04  | 5.40E-05 | 6.29E-05 | 2.36E-03 |
| 24h | 2.19E-04  | 3.99E-06 | 3.68E-04 | 8.32E-04 |
| 36h | 1.14E-04  | 5.26E-05 | 3.43E-04 | 1.88E-05 |
| 48h | 1.69E-04  | 5.05E-06 | 5.56E-04 | 1.90E-04 |
| 72h | 2.85E-05  | 1.02E-05 | 6.86E-04 | 1.05E-03 |
|     | cgd8_4810 |          |          |          |
| 2h  | 2.36E-08  | 4.81E-07 | 9.19E-09 | 3.17E-07 |
| 6h  | 1.58E-07  | 3.32E-06 | 1.04E-06 | 5.21E-07 |
| 12h | 1.38E-07  | 7.47E-07 | 6.77E-07 | 6.56E-07 |
| 24h | 1.57E-07  | 1.50E-06 | 1.04E-06 | 6.98E-07 |
| 36h | 3.77E-07  | 5.33E-06 | 1.15E-06 | 8.75E-07 |
| 48h | 4.59E-07  | 4.65E-06 | 3.93E-07 | 6.89E-07 |
| 72h | 2.84E-07  | 1.84E-06 | 3.64E-07 | 1.39E-06 |
|     | cgd8_4830 |          |          |          |
| 2h  | 0.00E+00  | 0.00E+00 | 0.00E+00 | 0.00E+00 |
| 6h  | 0.00E+00  | 0.00E+00 | 3.07E-09 | 2.36E-11 |
| 12h | 4.35E-09  | 2.24E-08 | 1.82E-08 | 3.03E-08 |
| 24h | 3.20E-08  | 2.68E-08 | 3.86E-08 | 4.19E-08 |
| 36h | 1.70E-06  | 3.25E-06 | 1.15E-06 | 1.75E-06 |
| 48h | 8.15E-05  | 1.89E-04 | 1.42E-04 | 1.03E-04 |
| 72h | 1.19E-05  | 2.94E-05 | 7.21E-06 | 6.61E-06 |
|     | cgd8_4870 |          |          |          |
| 2h  | 5.29E-07  | 4.73E-07 | 4.12E-07 | 4.58E-07 |
| 6h  | 7.88E-08  | 1.57E-07 | 1.60E-08 | 1.16E-07 |
| 12h | 1.48E-07  | 1.18E-06 | 1.62E-07 | 3.32E-07 |
| 24h | 5.35E-07  | 7.58E-07 | 7.56E-08 | 1.46E-07 |
| 36h | 2.55E-07  | 3.72E-07 | 1.53E-07 | 2.69E-07 |
| 48h | 9.38E-08  | 2.13E-07 | 1.24E-07 | 1.27E-07 |
| 72h | 1.51E-07  | 5.91E-08 | 8.55E-08 | 4.00E-08 |
|     | cgd8_4880 |          |          |          |
| 2h  | 2.53E-04  | 1.17E-03 | 1.14E-04 | 1.89E-04 |
| 6h  | 1.65E-05  | 3.52E-04 | 3.66E-05 | 4.08E-05 |
| 12h | 1.18E-04  | 2.36E-03 | 1.36E-04 | 1.26E-04 |
| 24h | 1.07E-04  | 4.44E-04 | 6.95E-05 | 5.83E-05 |
| 36h | 8.27E-05  | 4.38E-04 | 7.41E-05 | 1.03E-04 |
| 48h | 4.55E-05  | 2.49E-04 | 7.08E-05 | 1.06E-04 |
| 72h | 2.52E-05  | 1.11E-04 | 2.71E-05 | 3.25E-05 |
|     | cgd8_4910 |          |          |          |
| 2h  | 1.47E-07  | 1.93E-08 | 1.28E-08 | 2.41E-08 |
| 6h  | 1.52E-06  | 4.50E-06 | 2.00E-06 | 4.05E-06 |
| 12h | 1.14E-07  | 6.63E-07 | 2.00E-06 | 7.53E-07 |
| 24h | 5.86E-07  | 1.02E-06 | 2.15E-06 | 1.35E-06 |
| 36h | 8.04E-07  | 9.40E-07 | 1.37E-06 | 2.72E-06 |
| 48h | 1.83E-06  | 6.42E-07 | 1.25E-06 | 1.16E-06 |
| 72h | 5.29E-07  | 6.56E-07 | 4.75E-07 | 4.86E-07 |
|     | cgd8_4890 |          |          |          |
| 2h  | 0.00E+00  | 0.00E+00 | 0.00E+00 | 0.00E+00 |
| 6h  | 6.28E-08  | 5.23E-08 | 3.44E-08 | 9.74E-07 |
| 12h | 5.30E-10  | 3.13E-09 | 8.56E-09 | 1.47E-08 |
| 24h | 1.34E-08  | 2.32E-08 | 3.46E-08 | 1.45E-07 |

|     |           |          |          |          |
|-----|-----------|----------|----------|----------|
| 36h | 2.02E-08  | 4.93E-08 | 8.24E-08 | 3.23E-07 |
| 48h | 3.38E-08  | 5.80E-08 | 5.78E-08 | 1.55E-07 |
| 72h | 1.79E-08  | 2.03E-08 | 1.68E-08 | 4.26E-07 |
|     | cgd8_4950 |          |          |          |
| 2h  | 1.36E-08  | 0.00E+00 | 1.58E-08 | 0.00E+00 |
| 6h  | 5.04E-10  | 0.00E+00 | 9.45E-10 | 0.00E+00 |
| 12h | 2.89E-09  | 1.43E-08 | 4.73E-08 | 1.02E-07 |
| 24h | 6.55E-09  | 6.18E-08 | 1.57E-08 | 3.08E-07 |
| 36h | 9.94E-08  | 5.17E-08 | 1.31E-07 | 3.35E-07 |
| 48h | 6.21E-08  | 2.11E-07 | 2.42E-07 | 1.93E-06 |
| 72h | 3.75E-07  | 4.54E-07 | 4.23E-07 | 4.28E-06 |
|     | cgd8_4980 |          |          |          |
| 2h  | 1.39E-04  | 4.06E-08 | 8.42E-07 | 6.70E-08 |
| 6h  | 4.48E-04  | 1.99E-06 | 7.97E-06 | 4.40E-07 |
| 12h | 1.69E-11  | 0.00E+00 | 1.08E-06 | 3.64E-07 |
| 24h | 5.55E-05  | 3.44E-06 | 3.82E-06 | 1.92E-09 |
| 36h | 4.81E-06  | 2.79E-06 | 1.32E-06 | 8.89E-07 |
| 48h | 9.05E-07  | 3.31E-07 | 1.45E-06 | 1.86E-06 |
| 72h | 4.14E-04  | 1.82E-06 | 1.81E-06 | 8.07E-07 |
|     | cgd8_4990 |          |          |          |
| 2h  | 1.11E-05  | 1.10E-05 | 0.00E+00 | 4.84E-06 |
| 6h  | 8.93E-05  | 8.84E-05 | 5.90E-05 | 1.30E-05 |
| 12h | 5.07E-05  | 4.60E-05 | 7.08E-06 | 1.22E-06 |
| 24h | 1.55E-04  | 7.54E-06 | 2.29E-05 | 5.56E-06 |
| 36h | 3.14E-04  | 6.75E-05 | 2.80E-05 | 2.09E-06 |
| 48h | 6.74E-05  | 1.10E-05 | 1.07E-05 | 1.25E-05 |
| 72h | 3.41E-05  | 4.57E-06 | 9.84E-06 | 6.64E-07 |
|     | cgd8_5000 |          |          |          |
| 2h  | 8.09E-06  | 3.17E-06 | 5.09E-07 | 5.88E-06 |
| 6h  | 1.87E-07  | 3.57E-07 | 4.73E-07 | 9.89E-07 |
| 12h | 3.63E-07  | 4.96E-07 | 2.25E-06 | 9.06E-07 |
| 24h | 1.63E-06  | 8.99E-07 | 8.82E-07 | 5.64E-07 |
| 36h | 4.24E-07  | 2.83E-07 | 3.83E-07 | 5.10E-07 |
| 48h | 2.67E-07  | 1.29E-07 | 3.29E-07 | 5.72E-07 |
| 72h | 2.57E-07  | 1.81E-07 | 2.15E-07 | 5.41E-07 |
|     | cgd8_5020 |          |          |          |
| 2h  | 6.18E-08  | 1.05E-07 | 0.00E+00 | 6.66E-07 |
| 6h  | 9.91E-08  | 2.51E-06 | 4.10E-06 | 6.06E-06 |
| 12h | 1.15E-07  | 1.10E-06 | 7.62E-07 | 4.07E-06 |
| 24h | 8.11E-08  | 2.62E-07 | 8.26E-07 | 2.53E-06 |
| 36h | 2.62E-07  | 1.35E-06 | 1.93E-06 | 7.45E-06 |
| 48h | 2.12E-07  | 9.96E-07 | 1.28E-06 | 1.13E-05 |
| 72h | 2.92E-07  | 3.66E-07 | 4.66E-07 | 1.06E-06 |
|     | cgd8_5030 |          |          |          |
| 2h  | 0.00E+00  | 0.00E+00 | 0.00E+00 | 4.77E-06 |
| 6h  | 0.00E+00  | 0.00E+00 | 2.40E-05 | 2.26E-06 |
| 12h | 1.08E-02  | 1.62E-02 | 7.09E-04 | 3.25E-04 |
| 24h | 1.44E-03  | 9.28E-04 | 2.43E-04 | 1.09E-05 |
| 36h | 2.79E-03  | 7.71E-04 | 6.58E-04 | 4.41E-04 |
| 48h | 1.06E-03  | 1.72E-04 | 2.72E-04 | 6.78E-06 |
| 72h | 3.99E-04  | 6.96E-05 | 1.45E-04 | 3.44E-05 |
|     | cgd8_5050 |          |          |          |
| 2h  | 0.00E+00  | 0.00E+00 | 0.00E+00 | 0.00E+00 |

|     |           |          |          |          |
|-----|-----------|----------|----------|----------|
| 6h  | 0.00E+00  | 0.00E+00 | 0.00E+00 | 0.00E+00 |
| 12h | 2.89E-10  | 3.12E-09 | 0.00E+00 | 2.61E-09 |
| 24h | 4.61E-09  | 8.37E-09 | 5.02E-09 | 2.78E-09 |
| 36h | 1.41E-08  | 1.00E-08 | 1.41E-08 | 3.50E-08 |
| 48h | 2.49E-07  | 1.67E-07 | 5.79E-07 | 1.07E-06 |
| 72h | 5.12E-07  | 2.29E-07 | 3.04E-07 | 1.77E-06 |
|     | cgd8_5080 |          |          |          |
| 2h  | 2.25E-04  | 3.90E-06 | 5.74E-07 | 4.61E-08 |
| 6h  | 0.00E+00  | 0.00E+00 | 0.00E+00 | 3.18E-07 |
| 12h | 1.09E-05  | 3.80E-07 | 2.26E-07 | 3.42E-07 |
| 24h | 3.24E-06  | 3.42E-08 | 7.78E-08 | 1.07E-08 |
| 36h | 1.18E-05  | 4.51E-08 | 7.51E-08 | 5.34E-07 |
| 48h | 9.51E-06  | 9.83E-07 | 1.17E-06 | 7.35E-06 |
| 72h | 1.61E-04  | 5.30E-06 | 1.96E-05 | 6.52E-05 |
|     | cgd8_5090 |          |          |          |
| 2h  | 0.00E+00  | 0.00E+00 | 1.30E-07 | 0.00E+00 |
| 6h  | 0.00E+00  | 0.00E+00 | 0.00E+00 | 1.75E-06 |
| 12h | 0.00E+00  | 0.00E+00 | 0.00E+00 | 1.45E-05 |
| 24h | 4.12E-08  | 2.99E-07 | 4.23E-08 | 1.73E-06 |
| 36h | 6.54E-08  | 1.18E-06 | 6.96E-07 | 7.91E-06 |
| 48h | 1.04E-05  | 3.07E-05 | 9.94E-05 | 1.24E-04 |
| 72h | 8.40E-04  | 1.21E-04 | 3.45E-04 | 4.35E-05 |
|     | cgd8_5120 |          |          |          |
| 2h  | 1.92E-06  | 5.52E-05 | 2.95E-05 | 2.02E-07 |
| 6h  | 2.38E-05  | 8.41E-04 | 1.13E-03 | 5.16E-06 |
| 12h | 1.82E-06  | 1.21E-04 | 1.43E-04 | 7.70E-06 |
| 24h | 4.08E-06  | 2.18E-04 | 7.04E-05 | 2.87E-05 |
| 36h | 2.28E-05  | 2.47E-04 | 1.49E-04 | 5.26E-06 |
| 48h | 1.99E-05  | 1.64E-04 | 1.91E-04 | 1.66E-05 |
| 72h | 1.48E-05  | 7.57E-05 | 7.83E-04 | 2.59E-06 |
|     | cgd8_5130 |          |          |          |
| 2h  | 7.42E-07  | 7.83E-07 | 1.76E-06 | 1.02E-04 |
| 6h  | 3.44E-07  | 1.54E-06 | 6.86E-07 | 7.63E-05 |
| 12h | 3.04E-07  | 7.01E-07 | 4.63E-07 | 3.78E-05 |
| 24h | 2.77E-07  | 4.19E-07 | 2.49E-07 | 5.81E-06 |
| 36h | 2.01E-07  | 5.28E-07 | 2.05E-07 | 2.30E-05 |
| 48h | 2.89E-07  | 4.82E-07 | 5.48E-07 | 1.69E-05 |
| 72h | 2.73E-07  | 2.25E-07 | 4.71E-07 | 5.01E-06 |
|     | cgd8_5140 |          |          |          |
| 2h  | 6.16E-09  | 2.34E-07 | 0.00E+00 | 1.59E-06 |
| 6h  | 1.49E-07  | 2.62E-07 | 7.38E-07 | 4.43E-06 |
| 12h | 1.97E-08  | 8.01E-08 | 4.76E-08 | 1.29E-06 |
| 24h | 3.79E-08  | 2.46E-08 | 2.19E-07 | 3.11E-06 |
| 36h | 3.62E-07  | 3.74E-07 | 1.63E-07 | 1.74E-05 |
| 48h | 1.77E-07  | 1.01E-07 | 8.36E-08 | 3.53E-06 |
| 72h | 1.05E-07  | 9.13E-08 | 6.89E-08 | 3.24E-06 |
|     | cgd8_5150 |          |          |          |
| 2h  | 1.00E-06  | 5.08E-07 | 4.06E-07 | 6.11E-07 |
| 6h  | 6.89E-07  | 4.02E-07 | 4.30E-07 | 7.72E-06 |
| 12h | 4.24E-08  | 2.29E-08 | 2.47E-07 | 1.76E-07 |
| 24h | 3.17E-07  | 6.27E-08 | 4.76E-07 | 2.50E-07 |
| 36h | 1.85E-07  | 1.08E-07 | 2.95E-07 | 3.67E-07 |
| 48h | 3.97E-07  | 1.70E-07 | 5.40E-07 | 2.38E-07 |

|     |           |          |          |          |
|-----|-----------|----------|----------|----------|
| 72h | 9.11E-08  | 3.77E-08 | 7.69E-08 | 1.38E-07 |
|     | cgd8_5160 |          |          |          |
| 2h  | 5.36E-07  | 3.58E-07 | 1.55E-06 | 6.81E-07 |
| 6h  | 6.28E-07  | 4.24E-07 | 4.56E-07 | 2.71E-07 |
| 12h | 1.73E-05  | 7.46E-06 | 9.41E-06 | 7.26E-06 |
| 24h | 5.50E-06  | 2.02E-06 | 2.04E-06 | 1.42E-06 |
| 36h | 2.31E-06  | 9.10E-07 | 3.65E-06 | 4.86E-06 |
| 48h | 1.32E-06  | 8.57E-07 | 3.45E-06 | 2.89E-06 |
| 72h | 1.57E-06  | 3.81E-07 | 1.30E-06 | 1.52E-06 |
|     | cgd8_5190 |          |          |          |
| 2h  | 2.20E-06  | 2.71E-07 | 1.28E-06 | 7.07E-07 |
| 6h  | 0.00E+00  | 5.67E-10 | 2.60E-09 | 7.46E-10 |
| 12h | 4.24E-08  | 5.60E-08 | 3.05E-07 | 9.16E-08 |
| 24h | 3.01E-07  | 4.88E-08 | 1.28E-07 | 9.63E-08 |
| 36h | 4.15E-07  | 1.29E-07 | 6.50E-07 | 2.93E-07 |
| 48h | 5.98E-07  | 2.63E-07 | 7.70E-07 | 4.22E-07 |
| 72h | 5.79E-07  | 4.25E-07 | 6.24E-07 | 1.84E-07 |
|     | cgd8_5200 |          |          |          |
| 2h  | 3.12E-04  | 9.96E-06 | 4.04E-04 | 2.79E-05 |
| 6h  | 1.79E-04  | 2.29E-05 | 2.03E-04 | 2.47E-05 |
| 12h | 1.36E-04  | 1.25E-05 | 3.20E-04 | 2.31E-05 |
| 24h | 1.48E-04  | 2.64E-05 | 1.78E-04 | 4.52E-05 |
| 36h | 9.04E-05  | 1.52E-05 | 1.98E-04 | 2.76E-05 |
| 48h | 5.11E-05  | 2.52E-05 | 1.20E-04 | 3.79E-05 |
| 72h | 4.07E-05  | 6.00E-06 | 7.03E-05 | 5.30E-06 |
|     | cgd8_5210 |          |          |          |
| 2h  | 0.00E+00  | 0.00E+00 | 0.00E+00 | 1.33E-04 |
| 6h  | 5.70E-06  | 6.35E-05 | 1.51E-05 | 4.11E-05 |
| 12h | 1.44E-05  | 4.03E-04 | 1.67E-06 | 5.01E-03 |
| 24h | 3.93E-05  | 4.46E-05 | 2.14E-07 | 9.67E-04 |
| 36h | 1.45E-05  | 6.26E-05 | 6.87E-05 | 4.25E-06 |
| 48h | 4.35E-05  | 1.50E-04 | 1.08E-05 | 3.02E-06 |
| 72h | 6.40E-05  | 1.49E-04 | 1.42E-05 | 7.75E-03 |
|     | cgd8_5220 |          |          |          |
| 2h  | 0.00E+00  | 2.92E-06 | 0.00E+00 | 5.21E-06 |
| 6h  | 5.61E-05  | 1.57E-03 | 2.69E-04 | 3.90E-03 |
| 12h | 1.69E-05  | 9.46E-06 | 1.75E-05 | 6.44E-05 |
| 24h | 6.87E-05  | 2.56E-04 | 1.47E-04 | 1.27E-03 |
| 36h | 1.12E-04  | 9.08E-04 | 1.51E-04 | 1.81E-03 |
| 48h | 9.20E-05  | 9.85E-04 | 3.06E-04 | 1.72E-03 |
| 72h | 3.87E-05  | 4.28E-04 | 1.75E-04 | 1.62E-03 |
|     | cgd8_5230 |          |          |          |
| 2h  | 3.01E-04  | 9.03E-06 | 1.94E-05 | 2.77E-05 |
| 6h  | 0.00E+00  | 1.29E-03 | 8.14E-03 | 1.53E-03 |
| 12h | 1.75E-02  | 7.53E-03 | 1.16E-02 | 2.92E-03 |
| 24h | 3.93E-03  | 8.27E-04 | 7.16E-03 | 1.39E-03 |
| 36h | 9.24E-03  | 2.22E-03 | 1.85E-02 | 6.94E-03 |
| 48h | 1.97E-02  | 6.62E-03 | 4.35E-02 | 1.36E-02 |
| 72h | 1.04E-02  | 1.77E-03 | 2.39E-02 | 4.11E-03 |
|     | cgd8_5240 |          |          |          |
| 2h  | 2.14E-03  | 3.02E-04 | 7.61E-04 | 9.07E-04 |
| 6h  | 6.47E-04  | 5.79E-04 | 2.42E-03 | 1.47E-03 |
| 12h | 3.83E-05  | 3.03E-05 | 9.58E-05 | 1.54E-04 |

|           |          |          |          |          |
|-----------|----------|----------|----------|----------|
| 24h       | 3.89E-04 | 1.82E-04 | 2.68E-04 | 4.10E-04 |
| 36h       | 8.24E-04 | 1.15E-04 | 9.89E-04 | 4.25E-04 |
| 48h       | 1.59E-04 | 7.11E-05 | 2.43E-04 | 2.35E-04 |
| 72h       | 4.21E-05 | 9.00E-05 | 1.65E-03 | 1.96E-04 |
| cgd8_5250 |          |          |          |          |
| 2h        | 1.76E-07 | 7.53E-09 | 0.00E+00 | 0.00E+00 |
| 6h        | 1.24E-06 | 2.16E-07 | 5.00E-07 | 6.10E-07 |
| 12h       | 1.37E-08 | 1.41E-08 | 2.45E-07 | 4.41E-08 |
| 24h       | 1.98E-07 | 1.42E-07 | 7.37E-07 | 3.15E-07 |
| 36h       | 4.77E-07 | 2.70E-07 | 6.85E-07 | 3.14E-07 |
| 48h       | 6.73E-07 | 4.80E-07 | 1.33E-06 | 3.55E-07 |
| 72h       | 2.69E-07 | 2.42E-07 | 9.63E-07 | 2.12E-07 |
| cgd8_5260 |          |          |          |          |
| 2h        | 4.05E-08 | 0.00E+00 | 1.74E-08 | 5.44E-07 |
| 6h        | 3.18E-07 | 7.21E-07 | 1.01E-06 | 1.94E-06 |
| 12h       | 1.42E-08 | 4.83E-08 | 4.86E-08 | 5.08E-07 |
| 24h       | 7.91E-08 | 2.97E-07 | 1.02E-06 | 1.51E-06 |
| 36h       | 2.66E-07 | 3.54E-07 | 5.23E-07 | 3.63E-06 |
| 48h       | 1.43E-07 | 2.49E-07 | 4.94E-07 | 1.97E-06 |
| 72h       | 5.02E-08 | 4.63E-08 | 5.00E-08 | 5.97E-07 |
| cgd8_5270 |          |          |          |          |
| 2h        | 1.35E-04 | 2.32E-05 | 2.19E-05 | 6.71E-05 |
| 6h        | 5.48E-05 | 1.12E-06 | 6.27E-05 | 2.33E-05 |
| 12h       | 9.72E-04 | 1.88E-04 | 2.64E-04 | 3.28E-04 |
| 24h       | 2.62E-04 | 6.92E-05 | 2.54E-04 | 1.98E-04 |
| 36h       | 3.80E-04 | 2.54E-04 | 1.45E-03 | 2.13E-03 |
| 48h       | 4.47E-04 | 7.38E-05 | 9.49E-04 | 2.08E-04 |
| 72h       | 5.42E-04 | 1.16E-04 | 9.72E-04 | 1.03E-04 |
| cgd8_5280 |          |          |          |          |
| 2h        | 1.11E-06 | 6.53E-07 | 3.52E-07 | 1.12E-06 |
| 6h        | 9.76E-07 | 6.95E-07 | 1.50E-07 | 9.43E-06 |
| 12h       | 3.65E-07 | 2.67E-07 | 3.66E-07 | 5.55E-07 |
| 24h       | 9.60E-07 | 3.60E-07 | 2.62E-07 | 3.82E-07 |
| 36h       | 2.71E-07 | 1.08E-07 | 1.26E-07 | 2.73E-07 |
| 48h       | 5.19E-07 | 1.08E-07 | 2.25E-07 | 1.81E-07 |
| 72h       | 1.13E-07 | 3.44E-08 | 1.57E-07 | 5.13E-08 |
| cgd8_5290 |          |          |          |          |
| 2h        | 3.54E-05 | 5.37E-06 | 1.32E-07 | 2.34E-04 |
| 6h        | 5.84E-05 | 5.03E-07 | 1.06E-07 | 2.28E-06 |
| 12h       | 8.37E-05 | 1.04E-04 | 2.39E-05 | 2.58E-04 |
| 24h       | 1.43E-05 | 2.79E-05 | 9.68E-06 | 4.35E-05 |
| 36h       | 2.95E-05 | 5.87E-06 | 3.42E-06 | 6.40E-05 |
| 48h       | 3.60E-05 | 4.18E-06 | 2.85E-06 | 4.94E-05 |
| 72h       | 2.03E-05 | 2.73E-06 | 2.02E-06 | 1.52E-05 |
| cgd8_5300 |          |          |          |          |
| 2h        | 1.07E-04 | 2.97E-06 | 5.19E-07 | 8.53E-05 |
| 6h        | 4.03E-05 | 1.62E-06 | 3.02E-07 | 4.01E-05 |
| 12h       | 5.67E-04 | 6.68E-04 | 1.34E-04 | 1.04E-03 |
| 24h       | 4.73E-04 | 4.02E-05 | 2.82E-05 | 2.10E-04 |
| 36h       | 1.99E-04 | 5.37E-05 | 8.68E-05 | 9.30E-04 |
| 48h       | 5.15E-04 | 3.64E-05 | 5.09E-05 | 8.19E-04 |
| 72h       | 8.66E-05 | 7.64E-06 | 1.39E-06 | 8.83E-05 |
| cgd8_5310 |          |          |          |          |

|     |           |          |          |          |
|-----|-----------|----------|----------|----------|
| 2h  | 0.00E+00  | 0.00E+00 | 0.00E+00 | 0.00E+00 |
| 6h  | 1.88E-09  | 3.63E-10 | 0.00E+00 | 8.14E-10 |
| 12h | 4.20E-07  | 4.90E-07 | 6.84E-07 | 2.68E-07 |
| 24h | 4.15E-07  | 4.22E-08 | 4.45E-08 | 7.21E-08 |
| 36h | 1.95E-07  | 1.39E-07 | 6.05E-07 | 3.47E-07 |
| 48h | 2.93E-07  | 4.65E-08 | 5.44E-08 | 1.67E-07 |
| 72h | 3.30E-08  | 1.06E-08 | 2.11E-08 | 1.12E-08 |
|     | cgd8_5320 |          |          |          |
| 2h  | 1.20E-07  | 5.94E-09 | 1.57E-09 | 0.00E+00 |
| 6h  | 6.60E-09  | 6.12E-08 | 0.00E+00 | 1.79E-08 |
| 12h | 0.00E+00  | 7.24E-10 | 3.96E-10 | 1.36E-08 |
| 24h | 5.15E-08  | 1.55E-09 | 8.20E-09 | 3.49E-08 |
| 36h | 1.30E-07  | 2.79E-08 | 7.37E-09 | 5.16E-08 |
| 48h | 4.34E-06  | 3.92E-07 | 3.41E-07 | 2.06E-06 |
| 72h | 5.06E-07  | 3.87E-08 | 5.02E-08 | 1.46E-07 |
|     | cgd8_5330 |          |          |          |
| 2h  | 9.48E-07  | 2.21E-07 | 5.84E-08 | 2.15E-07 |
| 6h  | 2.68E-07  | 3.65E-07 | 5.41E-08 | 1.90E-07 |
| 12h | 4.42E-08  | 3.36E-07 | 7.21E-08 | 1.31E-07 |
| 24h | 2.29E-07  | 3.74E-08 | 7.72E-08 | 3.38E-07 |
| 36h | 3.23E-07  | 2.89E-07 | 2.81E-07 | 1.90E-07 |
| 48h | 1.66E-05  | 6.86E-06 | 8.04E-06 | 1.74E-05 |
| 72h | 5.24E-07  | 2.51E-07 | 7.95E-07 | 4.90E-07 |
|     | cgd8_5340 |          |          |          |
| 2h  | 2.91E-05  | 7.13E-06 | 2.35E-06 | 2.21E-05 |
| 6h  | 2.54E-06  | 4.30E-06 | 2.70E-06 | 6.92E-06 |
| 12h | 4.24E-06  | 1.01E-05 | 1.85E-05 | 1.52E-05 |
| 24h | 2.15E-05  | 6.58E-06 | 1.22E-05 | 2.76E-05 |
| 36h | 4.84E-06  | 1.28E-05 | 1.67E-05 | 1.87E-05 |
| 48h | 1.32E-05  | 4.58E-06 | 9.77E-06 | 2.74E-05 |
| 72h | 1.90E-06  | 6.70E-07 | 3.68E-06 | 2.31E-06 |
|     | cgd8_5350 |          |          |          |
| 2h  | 3.62E-07  | 3.72E-08 | 1.48E-08 | 1.60E-06 |
| 6h  | 2.05E-08  | 2.87E-08 | 1.62E-08 | 0.00E+00 |
| 12h | 2.95E-06  | 1.03E-06 | 5.49E-07 | 1.27E-06 |
| 24h | 4.49E-06  | 3.81E-07 | 4.80E-07 | 9.05E-07 |
| 36h | 7.76E-07  | 7.45E-07 | 5.00E-07 | 1.76E-06 |
| 48h | 2.93E-06  | 4.15E-07 | 7.05E-07 | 9.68E-07 |
| 72h | 3.97E-07  | 1.25E-07 | 1.03E-07 | 1.74E-08 |
|     | cgd8_5370 |          |          |          |
| 2h  | 1.01E-06  | 1.57E-05 | 0.00E+00 | 8.62E-07 |
| 6h  | 3.55E-07  | 2.75E-05 | 2.57E-05 | 1.61E-06 |
| 12h | 3.56E-07  | 0.00E+00 | 5.17E-05 | 9.25E-07 |
| 24h | 8.95E-07  | 9.29E-06 | 2.93E-04 | 3.66E-06 |
| 36h | 1.96E-06  | 1.37E-05 | 4.72E-05 | 2.21E-06 |
| 48h | 3.42E-06  | 5.02E-06 | 3.69E-04 | 4.24E-06 |
| 72h | 2.88E-06  | 6.27E-06 | 5.94E-04 | 3.50E-06 |
|     | cgd8_5380 |          |          |          |
| 2h  | 5.75E-04  | 1.15E-03 | 9.56E-06 | 1.62E-04 |
| 6h  | 5.95E-05  | 3.51E-05 | 9.25E-06 | 2.51E-04 |
| 12h | 2.93E-04  | 1.66E-04 | 4.77E-05 | 1.38E-03 |
| 24h | 4.94E-04  | 4.17E-05 | 4.25E-05 | 5.55E-04 |
| 36h | 1.74E-04  | 2.28E-05 | 2.89E-05 | 6.24E-04 |



|     |           |          |          |          |
|-----|-----------|----------|----------|----------|
| 48h | 4.96E-04  | 3.97E-05 | 3.58E-05 | 7.31E-04 |
| 72h | 1.36E-04  | 9.69E-06 | 9.43E-06 | 3.03E-04 |
|     | cgd8_5390 |          |          |          |
| 2h  | 3.27E-06  | 4.91E-07 | 8.87E-08 | 5.15E-06 |
| 6h  | 5.03E-07  | 8.81E-07 | 4.01E-07 | 3.36E-06 |
| 12h | 6.05E-07  | 7.57E-07 | 2.92E-07 | 3.36E-06 |
| 24h | 1.82E-06  | 5.43E-07 | 9.55E-07 | 1.41E-06 |
| 36h | 7.42E-07  | 6.12E-07 | 2.71E-07 | 4.09E-06 |
| 48h | 9.44E-07  | 1.09E-06 | 4.93E-07 | 2.82E-06 |
| 72h | 1.05E-06  | 2.77E-07 | 4.21E-07 | 7.35E-07 |
|     | cgd8_5400 |          |          |          |
| 2h  | 2.11E-09  | 2.70E-06 | 1.43E-10 | 3.17E-08 |
| 6h  | 5.66E-10  | 1.06E-08 | 3.80E-09 | 3.13E-08 |
| 12h | 1.04E-08  | 2.15E-08 | 6.63E-09 | 1.17E-07 |
| 24h | 2.56E-08  | 5.98E-09 | 4.73E-08 | 6.54E-08 |
| 36h | 1.62E-07  | 2.77E-08 | 3.82E-08 | 7.81E-07 |
| 48h | 7.14E-08  | 6.31E-08 | 1.12E-07 | 6.05E-07 |
| 72h | 1.02E-07  | 2.33E-08 | 3.59E-08 | 1.03E-07 |
|     | cgd8_5410 |          |          |          |
| 2h  | 6.38E-07  | 1.22E-04 | 0.00E+00 | 1.57E-06 |
| 6h  | 2.16E-05  | 6.16E-04 | 9.24E-06 | 1.05E-05 |
| 12h | 1.10E-04  | 1.39E-03 | 3.61E-06 | 1.58E-03 |
| 24h | 2.62E-05  | 1.52E-04 | 4.07E-05 | 3.61E-04 |
| 36h | 8.43E-06  | 2.00E-07 | 3.65E-05 | 1.97E-06 |
| 48h | 8.62E-06  | 4.79E-07 | 2.91E-05 | 2.76E-04 |
| 72h | 1.35E-05  | 3.77E-04 | 1.76E-05 | 3.30E-04 |
|     | cgd8_5420 |          |          |          |
| 2h  | 6.22E-05  | 1.01E-04 | 6.19E-05 | 1.84E-03 |
| 6h  | 1.35E-05  | 2.74E-05 | 1.34E-05 | 3.19E-04 |
| 12h | 5.64E-04  | 2.31E-03 | 4.47E-04 | 1.77E-03 |
| 24h | 2.66E-04  | 5.69E-04 | 1.07E-04 | 4.68E-04 |
| 36h | 5.41E-05  | 1.53E-04 | 6.34E-05 | 5.66E-04 |
| 48h | 1.12E-03  | 7.00E-05 | 6.67E-05 | 3.49E-04 |
| 72h | 3.89E-05  | 1.30E-04 | 2.31E-05 | 2.01E-04 |
|     | cgd1_1040 |          |          |          |
| 2h  | 0.00E+00  | 0.00E+00 | 0.00E+00 | 0.00E+00 |
| 6h  | 0.00E+00  | 0.00E+00 | 0.00E+00 | 0.00E+00 |
| 12h | 2.89E-03  | 1.48E-04 | 1.25E-03 | 6.62E-05 |
| 24h | 5.99E-04  | 2.24E-05 | 3.77E-04 | 3.31E-04 |
| 36h | 1.80E-04  | 3.19E-05 | 9.58E-04 | 9.19E-05 |
| 48h | 2.79E-04  | 7.06E-05 | 5.59E-04 | 1.30E-04 |
| 72h | 3.29E-04  | 1.71E-06 | 3.27E-03 | 9.49E-04 |
|     | cgd1_1070 |          |          |          |
| 2h  | 2.59E-07  | 9.66E-08 | 5.80E-08 | 6.87E-07 |
| 6h  | 3.37E-08  | 3.31E-07 | 1.27E-07 | 2.67E-07 |
| 12h | 2.65E-07  | 7.29E-07 | 1.90E-07 | 3.84E-07 |
| 24h | 1.44E-07  | 3.77E-07 | 1.99E-07 | 4.58E-07 |
| 36h | 1.93E-07  | 2.67E-07 | 2.26E-07 | 3.96E-07 |
| 48h | 5.89E-08  | 1.16E-07 | 9.51E-08 | 1.71E-07 |
| 72h | 3.57E-08  | 4.42E-08 | 4.74E-08 | 4.43E-08 |
|     | cgd1_1200 |          |          |          |
| 2h  | 6.53E-06  | 1.98E-05 | 1.44E-05 | 1.36E-04 |
| 6h  | 1.06E-07  | 1.02E-06 | 2.74E-07 | 6.30E-06 |

|     |           |          |          |          |
|-----|-----------|----------|----------|----------|
| 12h | 1.89E-04  | 2.80E-03 | 1.30E-04 | 7.57E-04 |
| 24h | 3.98E-05  | 4.05E-04 | 1.88E-05 | 2.04E-04 |
| 36h | 1.07E-05  | 1.03E-04 | 3.15E-05 | 1.40E-04 |
| 48h | 8.04E-06  | 4.82E-05 | 1.52E-05 | 7.76E-05 |
| 72h | 1.30E-05  | 1.12E-04 | 1.37E-05 | 3.79E-05 |
|     | cgd1_1320 |          |          |          |
| 2h  | 2.74E-09  | 1.50E-08 | 2.94E-08 | 3.42E-08 |
| 6h  | 3.34E-08  | 3.68E-08 | 6.88E-08 | 1.24E-07 |
| 12h | 3.05E-08  | 9.69E-09 | 1.05E-08 | 7.81E-08 |
| 24h | 6.86E-09  | 1.37E-08 | 1.16E-07 | 6.84E-08 |
| 36h | 2.24E-08  | 4.23E-08 | 3.89E-08 | 7.67E-08 |
| 48h | 1.91E-08  | 2.19E-08 | 3.15E-08 | 3.78E-08 |
| 72h | 1.39E-08  | 1.34E-08 | 3.45E-09 | 3.24E-08 |
|     | cgd1_1540 |          |          |          |
| 2h  | 1.84E-07  | 1.56E-07 | 5.67E-08 | 1.19E-07 |
| 6h  | 2.15E-07  | 1.63E-07 | 2.48E-07 | 2.46E-07 |
| 12h | 3.31E-07  | 2.92E-07 | 3.96E-07 | 4.82E-07 |
| 24h | 3.46E-07  | 2.34E-07 | 7.61E-07 | 8.66E-07 |
| 36h | 1.50E-06  | 3.21E-06 | 1.42E-06 | 1.32E-06 |
| 48h | 8.65E-07  | 4.93E-07 | 9.14E-07 | 8.73E-07 |
| 72h | 2.52E-07  | 3.79E-07 | 1.57E-07 | 3.18E-07 |
|     | cgd1_1590 |          |          |          |
| 2h  | 2.01E-04  | 3.27E-03 | 1.63E-04 | 3.55E-03 |
| 6h  | 2.44E-04  | 1.27E-03 | 2.77E-04 | 1.11E-03 |
| 12h | 4.54E-05  | 4.39E-04 | 2.10E-04 | 1.14E-03 |
| 24h | 2.85E-04  | 1.39E-03 | 3.69E-04 | 1.38E-03 |
| 36h | 6.92E-05  | 3.52E-04 | 8.01E-05 | 4.56E-04 |
| 48h | 4.13E-05  | 2.57E-04 | 1.19E-04 | 4.48E-04 |
| 72h | 3.48E-05  | 1.31E-04 | 4.58E-05 | 1.29E-04 |
|     | cgd1_160  |          |          |          |
| 2h  | 9.38E-07  | 1.90E-06 | 1.28E-07 | 5.71E-06 |
| 6h  | 4.81E-06  | 8.94E-06 | 1.92E-06 | 7.02E-06 |
| 12h | 2.21E-08  | 2.00E-08 | 1.78E-06 | 1.42E-06 |
| 24h | 6.94E-07  | 5.72E-07 | 1.20E-06 | 1.04E-06 |
| 36h | 2.16E-07  | 5.94E-07 | 1.48E-07 | 7.64E-07 |
| 48h | 2.69E-07  | 5.44E-07 | 2.18E-07 | 7.04E-07 |
| 72h | 6.32E-08  | 1.17E-07 | 5.23E-08 | 3.38E-07 |
|     | cgd1_1600 |          |          |          |
| 2h  | 1.04E-06  | 1.50E-06 | 4.74E-07 | 1.24E-06 |
| 6h  | 8.90E-07  | 6.86E-07 | 4.31E-07 | 5.24E-07 |
| 12h | 3.24E-07  | 1.80E-07 | 4.87E-07 | 4.19E-07 |
| 24h | 7.63E-07  | 1.24E-06 | 7.15E-07 | 3.70E-07 |
| 36h | 3.80E-07  | 3.80E-07 | 3.33E-07 | 4.77E-07 |
| 48h | 3.76E-07  | 2.50E-07 | 4.02E-07 | 2.14E-07 |
| 72h | 2.15E-07  | 1.75E-07 | 2.77E-07 | 2.98E-07 |
|     | cgd1_1620 |          |          |          |
| 2h  | 1.31E-06  | 1.46E-07 | 2.47E-06 | 1.20E-06 |
| 6h  | 1.02E-07  | 7.84E-08 | 5.32E-07 | 1.64E-06 |
| 12h | 2.88E-07  | 3.91E-08 | 1.54E-06 | 9.78E-07 |
| 24h | 1.68E-06  | 5.19E-07 | 6.25E-07 | 4.48E-07 |
| 36h | 3.27E-07  | 8.97E-08 | 6.75E-07 | 8.06E-07 |
| 48h | 1.11E-06  | 1.13E-07 | 3.11E-07 | 8.32E-07 |
| 72h | 1.96E-07  | 6.30E-08 | 4.34E-07 | 1.84E-07 |

|     |           |          |          |          |
|-----|-----------|----------|----------|----------|
|     | cgd1_1720 |          |          |          |
| 2h  | 1.56E-06  | 2.23E-07 | 2.03E-07 | 1.62E-07 |
| 6h  | 1.72E-06  | 1.15E-06 | 8.10E-07 | 5.79E-07 |
| 12h | 2.50E-08  | 9.11E-09 | 4.27E-08 | 1.71E-08 |
| 24h | 4.18E-07  | 2.57E-07 | 6.04E-07 | 3.76E-07 |
| 36h | 4.36E-07  | 1.45E-07 | 9.57E-08 | 8.56E-08 |
| 48h | 4.71E-07  | 1.21E-07 | 9.23E-08 | 9.91E-08 |
| 72h | 1.10E-07  | 7.44E-08 | 5.42E-08 | 9.21E-08 |
|     | cgd1_1730 |          |          |          |
| 2h  | 1.53E-07  | 4.01E-08 | 2.43E-08 | 2.77E-08 |
| 6h  | 1.29E-04  | 1.70E-04 | 1.20E-04 | 1.31E-04 |
| 12h | 1.87E-06  | 1.67E-06 | 2.87E-06 | 2.23E-06 |
| 24h | 3.22E-05  | 9.40E-06 | 4.77E-05 | 3.45E-05 |
| 36h | 1.53E-05  | 1.45E-05 | 1.15E-05 | 1.31E-05 |
| 48h | 1.89E-05  | 7.69E-06 | 5.84E-06 | 7.65E-06 |
| 72h | 7.38E-07  | 3.57E-07 | 6.64E-07 | 4.25E-07 |
|     | cgd1_1900 |          |          |          |
| 2h  | 2.26E-07  | 2.77E-08 | 3.20E-07 | 1.20E-07 |
| 6h  | 2.21E-07  | 5.59E-08 | 8.12E-07 | 3.72E-07 |
| 12h | 1.41E-08  | 8.16E-08 | 7.92E-08 | 4.00E-08 |
| 24h | 1.52E-07  | 3.22E-08 | 4.87E-07 | 2.70E-07 |
| 36h | 1.13E-07  | 7.31E-08 | 1.07E-07 | 2.01E-07 |
| 48h | 5.11E-07  | 1.93E-07 | 7.72E-07 | 8.08E-07 |
| 72h | 2.48E-07  | 2.38E-07 | 3.62E-07 | 3.04E-07 |
|     | cgd1_2040 |          |          |          |
| 2h  | 7.55E-05  | 6.96E-06 | 1.87E-04 | 2.57E-04 |
| 6h  | 3.07E-05  | 1.37E-05 | 3.11E-04 | 3.51E-04 |
| 12h | 1.08E-04  | 6.41E-05 | 8.45E-04 | 3.35E-04 |
| 24h | 5.30E-05  | 1.07E-05 | 2.27E-04 | 2.53E-04 |
| 36h | 7.32E-05  | 2.52E-05 | 3.82E-04 | 6.84E-04 |
| 48h | 1.25E-04  | 1.46E-05 | 4.66E-04 | 6.43E-04 |
| 72h | 2.76E-05  | 1.41E-05 | 3.52E-04 | 1.73E-04 |
|     | cgd1_2050 |          |          |          |
| 2h  | 1.85E-05  | 6.20E-06 | 9.41E-05 | 2.31E-04 |
| 6h  | 8.58E-06  | 4.52E-05 | 9.12E-05 | 4.60E-04 |
| 12h | 2.06E-06  | 5.84E-07 | 1.83E-04 | 9.76E-05 |
| 24h | 1.47E-05  | 4.56E-06 | 8.94E-05 | 8.86E-05 |
| 36h | 5.81E-06  | 2.94E-06 | 3.39E-05 | 6.74E-05 |
| 48h | 8.19E-06  | 1.03E-06 | 9.87E-05 | 1.70E-04 |
| 72h | 9.98E-07  | 1.11E-06 | 2.25E-05 | 1.36E-05 |
|     | cgd1_2340 |          |          |          |
| 2h  | 0.00E+00  | 8.03E-09 | 0.00E+00 | 3.50E-09 |
| 6h  | 7.97E-08  | 7.86E-08 | 2.71E-07 | 2.64E-07 |
| 12h | 9.78E-09  | 2.17E-08 | 4.80E-08 | 5.18E-09 |
| 24h | 1.74E-08  | 2.60E-08 | 2.01E-07 | 1.72E-07 |
| 36h | 7.53E-08  | 4.77E-08 | 3.37E-08 | 7.39E-08 |
| 48h | 1.36E-07  | 9.82E-08 | 5.55E-08 | 5.40E-08 |
| 72h | 1.99E-08  | 2.30E-08 | 1.10E-08 | 2.62E-08 |
|     | cgd1_290  |          |          |          |
| 2h  | 1.31E-07  | 2.44E-08 | 0.00E+00 | 9.16E-08 |
| 6h  | 3.03E-07  | 1.47E-06 | 5.48E-06 | 6.66E-06 |
| 12h | 9.50E-08  | 1.00E-07 | 4.74E-07 | 2.16E-07 |
| 24h | 1.64E-07  | 3.59E-07 | 2.74E-06 | 1.15E-06 |

|     |           |          |          |          |
|-----|-----------|----------|----------|----------|
| 36h | 5.12E-07  | 7.28E-07 | 9.84E-07 | 1.31E-06 |
| 48h | 7.96E-07  | 8.77E-07 | 1.23E-06 | 8.19E-07 |
| 72h | 3.18E-07  | 3.10E-07 | 7.51E-07 | 5.09E-07 |
|     | cgd1_2950 |          |          |          |
| 2h  | 1.49E-04  | 3.82E-05 | 1.86E-06 | 8.71E-06 |
| 6h  | 2.64E-05  | 7.98E-05 | 7.44E-05 | 5.59E-05 |
| 12h | 1.55E-06  | 3.44E-05 | 2.34E-05 | 2.26E-05 |
| 24h | 8.23E-05  | 2.03E-05 | 1.19E-05 | 2.83E-05 |
| 36h | 5.71E-05  | 5.08E-05 | 7.36E-06 | 6.07E-06 |
| 48h | 9.49E-05  | 9.93E-05 | 3.76E-06 | 2.59E-05 |
| 72h | 1.04E-04  | 8.07E-05 | 1.51E-05 | 6.26E-06 |
|     | cgd1_300  |          |          |          |
| 2h  | 2.32E-04  | 5.79E-04 | 5.01E-05 | 4.32E-05 |
| 6h  | 5.11E-04  | 1.12E-03 | 1.81E-03 | 3.56E-05 |
| 12h | 2.36E-04  | 1.10E-04 | 9.46E-04 | 2.62E-05 |
| 24h | 4.37E-05  | 4.96E-04 | 1.91E-04 | 1.31E-04 |
| 36h | 6.02E-05  | 1.47E-04 | 2.20E-04 | 1.94E-05 |
| 48h | 1.07E-04  | 2.12E-04 | 8.37E-05 | 6.71E-05 |
| 72h | 1.93E-04  | 1.30E-04 | 4.96E-05 | 4.30E-05 |
|     | cgd1_310  |          |          |          |
| 2h  | 4.41E-08  | 1.50E-09 | 5.78E-09 | 9.31E-09 |
| 6h  | 1.55E-07  | 2.48E-07 | 2.04E-07 | 4.81E-08 |
| 12h | 4.89E-06  | 2.10E-06 | 4.84E-07 | 4.69E-07 |
| 24h | 9.62E-07  | 1.15E-07 | 1.21E-07 | 2.83E-07 |
| 36h | 3.46E-07  | 1.57E-07 | 8.57E-08 | 2.62E-07 |
| 48h | 1.08E-06  | 8.33E-08 | 1.88E-07 | 2.36E-07 |
| 72h | 2.02E-07  | 1.71E-07 | 7.51E-08 | 1.89E-07 |
|     | cgd1_320  |          |          |          |
| 2h  | 3.18E-07  | 7.35E-08 | 1.02E-07 | 4.87E-08 |
| 6h  | 7.13E-08  | 2.76E-08 | 3.18E-08 | 5.87E-08 |
| 12h | 9.75E-06  | 7.23E-06 | 4.53E-06 | 3.50E-06 |
| 24h | 5.63E-06  | 9.04E-07 | 3.58E-07 | 4.22E-07 |
| 36h | 7.35E-07  | 1.61E-07 | 6.78E-07 | 1.28E-06 |
| 48h | 9.66E-07  | 1.40E-07 | 5.52E-07 | 1.82E-07 |
| 72h | 2.83E-07  | 8.36E-08 | 4.81E-08 | 2.66E-07 |
|     | cgd1_3280 |          |          |          |
| 2h  | 1.95E-07  | 3.46E-07 | 7.12E-08 | 1.26E-07 |
| 6h  | 1.20E-07  | 4.25E-07 | 1.07E-07 | 6.39E-08 |
| 12h | 5.58E-09  | 2.47E-08 | 1.80E-08 | 4.44E-08 |
| 24h | 1.17E-07  | 7.04E-08 | 1.21E-07 | 1.10E-07 |
| 36h | 6.09E-08  | 5.96E-08 | 3.22E-08 | 3.41E-07 |
| 48h | 1.44E-07  | 7.77E-08 | 1.80E-07 | 7.37E-08 |
| 72h | 4.97E-08  | 4.49E-08 | 2.27E-08 | 4.54E-08 |
|     | cgd1_330  |          |          |          |
| 2h  | 0.00E+00  | 0.00E+00 | 0.00E+00 | 0.00E+00 |
| 6h  | 4.92E-04  | 5.53E-04 | 1.51E-03 | 3.05E-05 |
| 12h | 1.52E-04  | 1.00E-04 | 5.19E-04 | 5.62E-06 |
| 24h | 4.22E-04  | 3.72E-05 | 6.62E-04 | 4.99E-05 |
| 36h | 3.86E-04  | 1.13E-04 | 4.36E-04 | 4.57E-05 |
| 48h | 9.28E-04  | 3.40E-04 | 1.78E-04 | 4.48E-05 |
| 72h | 2.30E-04  | 4.43E-05 | 2.56E-05 | 1.71E-05 |
|     | cgd1_3370 |          |          |          |
| 2h  | 3.00E-07  | 2.49E-07 | 0.00E+00 | 3.49E-08 |

|     |           |          |          |          |
|-----|-----------|----------|----------|----------|
| 6h  | 1.34E-04  | 5.02E-05 | 8.01E-05 | 6.44E-07 |
| 12h | 7.53E-05  | 4.99E-07 | 2.00E-05 | 1.62E-07 |
| 24h | 1.02E-04  | 5.64E-06 | 1.17E-06 | 4.82E-06 |
| 36h | 2.63E-04  | 3.14E-05 | 2.91E-05 | 3.94E-06 |
| 48h | 9.05E-04  | 8.42E-05 | 5.94E-05 | 1.95E-05 |
| 72h | 1.08E-03  | 9.22E-05 | 7.00E-05 | 2.42E-05 |
|     | cgd1_3380 |          |          |          |
| 2h  | 9.05E-07  | 3.74E-07 | 7.62E-06 | 1.45E-07 |
| 6h  | 1.68E-05  | 6.70E-06 | 1.13E-04 | 1.94E-06 |
| 12h | 8.36E-07  | 6.57E-07 | 2.36E-05 | 5.06E-07 |
| 24h | 5.20E-06  | 2.63E-06 | 5.79E-05 | 3.57E-06 |
| 36h | 6.82E-06  | 3.69E-06 | 1.64E-04 | 1.85E-06 |
| 48h | 5.70E-06  | 4.41E-06 | 2.85E-05 | 1.54E-06 |
| 72h | 4.81E-06  | 1.70E-06 | 2.63E-05 | 7.82E-07 |
|     | cgd1_340  |          |          |          |
| 2h  | 0.00E+00  | 3.00E-08 | 0.00E+00 | 0.00E+00 |
| 6h  | 1.46E-05  | 1.05E-05 | 6.49E-05 | 3.21E-06 |
| 12h | 2.88E-04  | 5.17E-05 | 1.69E-04 | 2.87E-06 |
| 24h | 1.02E-04  | 1.81E-05 | 4.15E-05 | 9.38E-06 |
| 36h | 3.99E-04  | 4.01E-05 | 2.32E-04 | 1.06E-05 |
| 48h | 4.67E-04  | 2.29E-05 | 1.15E-04 | 1.81E-05 |
| 72h | 3.74E-04  | 5.05E-05 | 5.54E-05 | 1.08E-05 |
|     | cgd1_360  |          |          |          |
| 2h  | 4.35E-04  | 2.29E-03 | 2.54E-06 | 4.76E-02 |
| 6h  | 2.46E-05  | 6.01E-04 | 5.00E-07 | 4.97E-03 |
| 12h | 5.45E-05  | 1.43E-03 | 8.04E-06 | 1.62E-02 |
| 24h | 3.52E-04  | 1.37E-03 | 3.90E-06 | 7.87E-03 |
| 36h | 2.37E-05  | 5.17E-04 | 2.14E-06 | 6.21E-03 |
| 48h | 3.92E-05  | 1.18E-03 | 1.26E-06 | 5.10E-03 |
| 72h | 2.34E-05  | 4.56E-04 | 3.05E-06 | 1.81E-03 |
|     | cgd1_3810 |          |          |          |
| 2h  | 3.29E-04  | 2.91E-04 | 3.60E-03 | 3.66E-04 |
| 6h  | 1.65E-03  | 1.58E-03 | 8.45E-03 | 7.98E-04 |
| 12h | 1.96E-04  | 2.54E-04 | 1.61E-03 | 4.59E-04 |
| 24h | 7.71E-04  | 2.06E-04 | 4.09E-03 | 1.09E-03 |
| 36h | 2.64E-04  | 1.85E-04 | 1.20E-03 | 2.78E-04 |
| 48h | 1.92E-04  | 4.87E-05 | 5.25E-04 | 1.21E-04 |
| 72h | 6.72E-05  | 2.15E-05 | 2.01E-04 | 3.79E-05 |
|     | cgd1_3850 |          |          |          |
| 2h  | 8.38E-06  | 5.62E-02 | 1.90E-05 | 7.11E-05 |
| 6h  | 1.89E-08  | 1.64E-04 | 3.88E-06 | 5.81E-05 |
| 12h | 2.57E-06  | 0.00E+00 | 1.19E-04 | 2.08E-04 |
| 24h | 1.96E-05  | 1.33E-03 | 1.61E-04 | 1.27E-03 |
| 36h | 1.01E-06  | 2.41E-03 | 1.47E-04 | 3.16E-04 |
| 48h | 8.54E-07  | 6.68E-04 | 1.04E-04 | 6.86E-06 |
| 72h | 1.35E-05  | 8.92E-04 | 3.51E-05 | 1.51E-04 |
|     | cgd1_3860 |          |          |          |
| 2h  | 5.09E-06  | 3.88E-07 | 1.93E-07 | 9.49E-08 |
| 6h  | 1.28E-07  | 1.57E-07 | 7.67E-08 | 2.47E-07 |
| 12h | 3.33E-08  | 1.59E-08 | 9.87E-08 | 2.35E-08 |
| 24h | 1.91E-06  | 1.05E-07 | 9.23E-08 | 1.33E-07 |
| 36h | 1.27E-05  | 7.10E-08 | 1.50E-07 | 2.57E-07 |
| 48h | 2.37E-05  | 8.05E-08 | 2.22E-07 | 2.51E-07 |

|     |          |          |          |          |
|-----|----------|----------|----------|----------|
| 72h | 2.34E-07 | 8.02E-08 | 9.35E-08 | 7.41E-08 |
|     | cgd1_40  |          |          |          |
| 2h  | 0.00E+00 | 0.00E+00 | 0.00E+00 | 0.00E+00 |
| 6h  | 1.55E-04 | 3.00E-06 | 4.24E-05 | 4.29E-05 |
| 12h | 8.47E-05 | 1.29E-07 | 1.06E-05 | 5.74E-06 |
| 24h | 2.41E-04 | 1.18E-06 | 6.84E-05 | 5.01E-05 |
| 36h | 1.67E-04 | 4.55E-06 | 3.51E-05 | 2.14E-05 |
| 48h | 1.38E-04 | 4.80E-06 | 2.35E-05 | 2.87E-05 |
| 72h | 2.19E-04 | 9.89E-07 | 2.12E-06 | 2.20E-06 |
|     | cgd1_470 |          |          |          |
| 2h  | 2.15E-05 | 2.72E-06 | 4.23E-06 | 5.13E-06 |
| 6h  | 8.48E-06 | 3.88E-06 | 6.95E-06 | 1.60E-05 |
| 12h | 6.85E-06 | 6.24E-07 | 4.25E-06 | 4.06E-06 |
| 24h | 1.68E-05 | 1.51E-06 | 8.70E-06 | 9.77E-06 |
| 36h | 1.15E-05 | 6.42E-06 | 7.83E-06 | 8.25E-06 |
| 48h | 5.42E-05 | 3.07E-06 | 6.05E-06 | 5.30E-06 |
| 72h | 3.06E-06 | 5.59E-07 | 1.00E-06 | 1.01E-06 |
|     | cgd1_50  |          |          |          |
| 2h  | 2.12E-05 | 1.95E-07 | 3.16E-08 | 2.36E-07 |
| 6h  | 5.77E-05 | 2.97E-06 | 1.65E-05 | 4.98E-05 |
| 12h | 1.97E-06 | 1.86E-07 | 6.05E-06 | 1.72E-06 |
| 24h | 5.38E-05 | 1.02E-06 | 1.59E-05 | 1.33E-05 |
| 36h | 2.55E-05 | 2.85E-06 | 8.86E-06 | 7.55E-06 |
| 48h | 3.97E-05 | 1.58E-06 | 2.47E-06 | 4.05E-06 |
| 72h | 6.82E-06 | 3.20E-07 | 1.54E-06 | 5.62E-07 |
|     | cgd1_500 |          |          |          |
| 2h  | 2.67E-10 | 0.00E+00 | 1.78E-09 | 0.00E+00 |
| 6h  | 0.00E+00 | 5.26E-08 | 1.39E-07 | 1.96E-07 |
| 12h | 4.43E-09 | 2.52E-09 | 1.27E-08 | 1.93E-08 |
| 24h | 3.26E-08 | 2.46E-08 | 2.54E-07 | 1.66E-07 |
| 36h | 1.08E-07 | 2.01E-07 | 1.42E-07 | 1.39E-07 |
| 48h | 9.09E-07 | 2.29E-07 | 5.40E-07 | 6.95E-07 |
| 72h | 2.00E-06 | 1.34E-06 | 1.67E-06 | 1.37E-06 |
|     | cgd1_520 |          |          |          |
| 2h  | 8.03E-04 | 2.87E-02 | 1.97E-03 | 4.16E-03 |
| 6h  | 5.76E-04 | 2.16E-02 | 2.24E-03 | 1.10E-02 |
| 12h | 8.26E-05 | 1.10E-02 | 2.70E-03 | 6.65E-03 |
| 24h | 4.00E-04 | 1.33E-02 | 9.14E-04 | 1.76E-02 |
| 36h | 1.21E-04 | 1.62E-03 | 1.45E-03 | 1.22E-03 |
| 48h | 2.23E-04 | 1.10E-02 | 9.36E-04 | 3.08E-03 |
| 72h | 1.42E-04 | 2.02E-03 | 4.36E-04 | 2.67E-03 |
|     | cgd1_550 |          |          |          |
| 2h  | 3.06E-05 | 6.70E-04 | 7.49E-04 | 9.46E-04 |
| 6h  | 4.69E-05 | 9.56E-04 | 1.58E-04 | 2.24E-04 |
| 12h | 4.71E-07 | 1.30E-05 | 3.18E-05 | 3.64E-04 |
| 24h | 6.27E-05 | 8.68E-05 | 7.39E-04 | 2.48E-03 |
| 36h | 2.00E-05 | 2.11E-04 | 2.16E-04 | 1.60E-03 |
| 48h | 8.63E-06 | 2.71E-04 | 1.78E-04 | 4.73E-04 |
| 72h | 7.19E-05 | 4.10E-04 | 1.33E-03 | 7.12E-04 |
|     | cgd1_600 |          |          |          |
| 2h  | 0.00E+00 | 1.97E-05 | 8.05E-04 | 5.00E-04 |
| 6h  | 2.60E-04 | 2.81E-05 | 6.70E-05 | 2.03E-04 |
| 12h | 1.87E-05 | 2.76E-06 | 1.55E-04 | 2.71E-04 |

|     |           |          |          |          |
|-----|-----------|----------|----------|----------|
| 24h | 2.50E-04  | 1.40E-05 | 1.33E-04 | 1.63E-04 |
| 36h | 7.05E-05  | 1.04E-05 | 1.29E-04 | 1.11E-04 |
| 48h | 1.76E-04  | 7.94E-06 | 7.52E-05 | 2.29E-04 |
| 72h | 5.78E-05  | 2.16E-04 | 3.42E-05 | 5.37E-05 |
|     | cgd1_640  |          |          |          |
| 2h  | 1.11E-02  | 1.23E-03 | 1.39E-02 | 6.26E-03 |
| 6h  | 7.31E-05  | 2.34E-05 | 3.80E-05 | 1.39E-04 |
| 12h | 8.77E-03  | 4.58E-04 | 6.01E-03 | 2.96E-03 |
| 24h | 8.39E-03  | 1.30E-03 | 2.40E-03 | 6.20E-04 |
| 36h | 0.00E+00  | 2.80E-04 | 1.42E-03 | 6.75E-04 |
| 48h | 3.39E-03  | 3.44E-04 | 5.18E-04 | 4.24E-04 |
| 72h | 7.28E-04  | 7.49E-05 | 2.74E-04 | 1.18E-04 |
|     | cgd1_710  |          |          |          |
| 2h  | 0.00E+00  | 0.00E+00 | 0.00E+00 | 0.00E+00 |
| 6h  | 0.00E+00  | 0.00E+00 | 0.00E+00 | 0.00E+00 |
| 12h | 7.87E-08  | 2.26E-08 | 6.02E-08 | 1.48E-07 |
| 24h | 2.20E-07  | 4.63E-08 | 3.89E-08 | 2.39E-08 |
| 36h | 1.73E-07  | 3.45E-07 | 4.63E-07 | 4.89E-07 |
| 48h | 8.36E-07  | 4.30E-07 | 4.75E-07 | 3.20E-07 |
| 72h | 1.14E-06  | 6.29E-07 | 5.91E-07 | 5.70E-07 |
|     | cgd3_3430 |          |          |          |
| 2h  | 0.00E+00  | 0.00E+00 | 5.56E-09 | 2.87E-08 |
| 6h  | 0.00E+00  | 0.00E+00 | 0.00E+00 | 5.20E-09 |
| 12h | 0.00E+00  | 2.46E-09 | 1.38E-09 | 6.51E-09 |
| 24h | 2.95E-10  | 9.26E-09 | 1.16E-08 | 2.77E-07 |
| 36h | 1.45E-07  | 1.57E-08 | 2.62E-08 | 6.06E-07 |
| 48h | 2.36E-06  | 5.43E-07 | 5.45E-07 | 2.78E-05 |
| 72h | 5.62E-08  | 1.10E-07 | 2.38E-07 | 7.38E-07 |
|     | cgd3_3820 |          |          |          |
| 2h  | 0.00E+00  | 0.00E+00 | 0.00E+00 | 0.00E+00 |
| 6h  | 0.00E+00  | 1.51E-06 | 0.00E+00 | 2.90E-07 |
| 12h | 1.42E-05  | 3.51E-05 | 1.05E-04 | 2.14E-05 |
| 24h | 6.65E-05  | 4.52E-05 | 5.33E-04 | 7.84E-05 |
| 36h | 3.04E-04  | 1.13E-04 | 4.50E-06 | 2.00E-04 |
| 48h | 6.37E-04  | 1.71E-05 | 1.44E-04 | 1.77E-04 |
| 72h | 5.85E-04  | 3.34E-05 | 3.97E-05 | 1.92E-04 |
|     | cgd3_3850 |          |          |          |
| 2h  | 4.02E-02  | 6.89E-05 | 1.06E-03 | 1.42E-02 |
| 6h  | 3.79E-03  | 3.58E-01 | 3.53E-04 | 2.45E-03 |
| 12h | 1.81E-03  | 4.03E-04 | 6.51E-05 | 8.12E-03 |
| 24h | 1.18E-03  | 2.88E-04 | 3.59E-04 | 7.42E-03 |
| 36h | 6.00E-04  | 1.68E-04 | 2.00E-04 | 5.12E-03 |
| 48h | 6.04E-04  | 2.19E-04 | 7.16E-04 | 7.15E-04 |
| 72h | 1.48E-03  | 7.36E-05 | 1.10E-04 | 1.86E-03 |
|     | cgd3_4100 |          |          |          |
| 2h  | 6.31E-06  | 1.34E-04 | 3.38E-05 | 9.98E-05 |
| 6h  | 2.00E-06  | 6.09E-06 | 4.36E-06 | 1.77E-05 |
| 12h | 1.34E-06  | 9.65E-06 | 7.76E-06 | 1.52E-05 |
| 24h | 3.02E-06  | 3.83E-06 | 3.80E-06 | 7.01E-05 |
| 36h | 3.73E-07  | 4.92E-06 | 3.81E-06 | 1.39E-05 |
| 48h | 9.82E-07  | 2.81E-06 | 4.52E-06 | 1.54E-05 |
| 72h | 7.68E-07  | 1.31E-06 | 9.64E-07 | 3.78E-06 |
|     | cgd3_4110 |          |          |          |

|     |           |          |          |          |
|-----|-----------|----------|----------|----------|
| 2h  | 3.69E-09  | 0.00E+00 | 1.36E-07 | 4.93E-08 |
| 6h  | 3.64E-08  | 4.97E-07 | 1.35E-07 | 9.00E-07 |
| 12h | 1.12E-08  | 8.91E-08 | 6.98E-09 | 5.62E-08 |
| 24h | 2.41E-08  | 2.34E-07 | 1.46E-07 | 0.00E+00 |
| 36h | 4.42E-08  | 4.70E-07 | 3.33E-07 | 1.25E-06 |
| 48h | 1.26E-07  | 2.15E-07 | 1.02E-07 | 1.51E-06 |
| 72h | 5.72E-08  | 5.81E-08 | 2.83E-07 | 3.80E-07 |
|     | cgd3_4170 |          |          |          |
| 2h  | 0.00E+00  | 0.00E+00 | 2.29E-05 | 4.38E-07 |
| 6h  | 0.00E+00  | 7.21E-07 | 3.66E-07 | 1.14E-07 |
| 12h | 6.00E-08  | 3.23E-08 | 1.60E-05 | 5.78E-07 |
| 24h | 3.06E-08  | 1.03E-05 | 7.44E-05 | 6.28E-06 |
| 36h | 3.13E-07  | 3.62E-05 | 1.99E-05 | 5.40E-06 |
| 48h | 3.51E-07  | 4.13E-05 | 1.36E-05 | 3.11E-06 |
| 72h | 8.67E-08  | 3.33E-05 | 5.52E-07 | 1.24E-06 |
|     | cgd3_4220 |          |          |          |
| 2h  | 3.42E-06  | 3.73E-05 | 4.64E-05 | 3.89E-05 |
| 6h  | 1.35E-06  | 9.75E-06 | 2.27E-05 | 3.02E-05 |
| 12h | 1.83E-06  | 4.81E-05 | 3.10E-05 | 2.36E-05 |
| 24h | 1.04E-06  | 1.47E-05 | 6.68E-06 | 1.15E-04 |
| 36h | 6.10E-07  | 2.54E-05 | 1.90E-05 | 1.88E-05 |
| 48h | 7.99E-07  | 7.10E-06 | 8.40E-06 | 4.10E-05 |
| 72h | 3.19E-07  | 1.65E-06 | 1.51E-06 | 2.58E-06 |
|     | cgd1_780  |          |          |          |
| 2h  | 2.23E-07  | 1.90E-06 | 0.00E+00 | 4.33E-06 |
| 6h  | 1.70E-04  | 1.31E-06 | 3.56E-04 | 1.87E-04 |
| 12h | 3.91E-07  | 0.00E+00 | 4.36E-07 | 9.41E-08 |
| 24h | 5.96E-06  | 6.97E-07 | 4.54E-06 | 3.47E-05 |
| 36h | 6.23E-05  | 2.19E-06 | 8.09E-06 | 1.20E-05 |
| 48h | 1.01E-05  | 5.43E-07 | 5.73E-06 | 1.35E-05 |
| 72h | 2.74E-05  | 2.38E-06 | 2.51E-06 | 2.64E-05 |
|     | cgd1_850  |          |          |          |
| 2h  | 8.56E-03  | 5.47E-05 | 1.18E-02 | 4.57E-03 |
| 6h  | 2.55E-02  | 1.03E-04 | 2.51E-02 | 1.41E-02 |
| 12h | 1.20E-03  | 1.06E-05 | 9.69E-03 | 4.17E-03 |
| 24h | 6.85E-03  | 9.28E-06 | 4.43E-03 | 2.56E-02 |
| 36h | 4.59E-03  | 9.25E-06 | 2.55E-03 | 3.85E-03 |
| 48h | 2.84E-03  | 2.23E-06 | 2.11E-03 | 1.14E-04 |
| 72h | 8.71E-04  | 6.74E-06 | 1.60E-03 | 1.29E-03 |
|     | cgd1_870  |          |          |          |
| 2h  | 5.21E-07  | 1.46E-07 | 1.71E-08 | 2.04E-07 |
| 6h  | 2.56E-06  | 9.35E-07 | 1.61E-06 | 2.02E-06 |
| 12h | 5.08E-08  | 2.36E-07 | 9.98E-08 | 6.65E-08 |
| 24h | 3.05E-07  | 2.06E-07 | 2.72E-07 | 7.26E-07 |
| 36h | 6.97E-07  | 1.18E-06 | 4.07E-07 | 7.84E-07 |
| 48h | 4.45E-06  | 6.91E-06 | 2.72E-06 | 1.03E-06 |
| 72h | 1.06E-06  | 3.96E-06 | 1.20E-06 | 7.38E-07 |
|     | cgd1_880  |          |          |          |
| 2h  | 1.21E-04  | 1.74E-03 | 8.84E-05 | 1.40E-04 |
| 6h  | 9.83E-05  | 5.93E-04 | 1.34E-04 | 2.39E-04 |
| 12h | 1.29E-05  | 4.93E-04 | 4.78E-05 | 2.76E-05 |
| 24h | 7.46E-05  | 2.25E-04 | 3.42E-05 | 9.00E-05 |
| 36h | 4.43E-05  | 2.44E-04 | 2.16E-05 | 4.16E-05 |



|     |           |          |          |          |
|-----|-----------|----------|----------|----------|
| 48h | 4.64E-05  | 1.98E-04 | 2.38E-05 | 2.00E-05 |
| 72h | 1.08E-05  | 1.13E-04 | 3.18E-05 | 1.32E-05 |
|     | cgd1_910  |          |          |          |
| 2h  | 1.59E-06  | 1.87E-06 | 1.34E-06 | 2.39E-06 |
| 6h  | 1.07E-06  | 7.18E-07 | 4.97E-07 | 1.16E-06 |
| 12h | 1.19E-06  | 3.92E-06 | 1.11E-06 | 1.99E-06 |
| 24h | 1.87E-06  | 7.16E-06 | 6.32E-07 | 2.35E-06 |
| 36h | 1.67E-06  | 4.62E-06 | 8.97E-07 | 1.74E-06 |
| 48h | 1.16E-06  | 1.38E-05 | 6.90E-07 | 1.50E-06 |
| 72h | 3.82E-07  | 1.10E-05 | 2.38E-07 | 2.46E-07 |
|     | cgd1_930  |          |          |          |
| 2h  | 0.00E+00  | 9.18E-07 | 0.00E+00 | 0.00E+00 |
| 6h  | 9.33E-04  | 8.03E-06 | 1.15E-03 | 3.30E-05 |
| 12h | 6.53E-04  | 1.12E-05 | 1.61E-03 | 4.51E-04 |
| 24h | 3.62E-04  | 3.23E-06 | 2.87E-04 | 6.72E-04 |
| 36h | 8.48E-04  | 7.15E-06 | 7.94E-04 | 6.62E-05 |
| 48h | 7.65E-04  | 2.92E-06 | 5.53E-04 | 5.56E-04 |
| 72h | 7.28E-05  | 1.50E-06 | 1.39E-04 | 1.25E-04 |
|     | cgd2_10   |          |          |          |
| 2h  | 0.00E+00  | 5.60E-09 | 0.00E+00 | 0.00E+00 |
| 6h  | 4.29E-05  | 1.10E-07 | 1.72E-04 | 2.76E-05 |
| 12h | 1.01E-04  | 2.70E-07 | 7.11E-05 | 8.01E-05 |
| 24h | 1.38E-04  | 1.31E-07 | 1.52E-04 | 5.41E-06 |
| 36h | 2.44E-04  | 1.14E-06 | 9.27E-05 | 7.03E-05 |
| 48h | 5.11E-04  | 7.13E-07 | 7.48E-04 | 2.39E-04 |
| 72h | 1.32E-03  | 0.00E+00 | 2.60E-03 | 7.19E-05 |
|     | cgd2_1000 |          |          |          |
| 2h  | 1.80E-06  | 2.36E-06 | 2.39E-07 | 9.62E-07 |
| 6h  | 1.03E-05  | 3.40E-05 | 3.30E-05 | 5.29E-05 |
| 12h | 1.18E-06  | 4.16E-06 | 3.46E-06 | 2.58E-06 |
| 24h | 4.91E-06  | 2.25E-05 | 5.08E-06 | 1.39E-05 |
| 36h | 1.01E-05  | 1.91E-05 | 8.48E-06 | 4.73E-06 |
| 48h | 7.35E-06  | 6.37E-05 | 1.43E-06 | 2.74E-06 |
| 72h | 2.37E-06  | 4.29E-05 | 2.49E-06 | 1.48E-06 |
|     | cgd2_1010 |          |          |          |
| 2h  | 7.30E-06  | 2.73E-05 | 8.31E-07 | 7.84E-06 |
| 6h  | 5.27E-06  | 6.10E-05 | 7.29E-06 | 1.47E-05 |
| 12h | 4.67E-07  | 4.28E-06 | 2.98E-06 | 1.73E-06 |
| 24h | 7.39E-06  | 1.45E-05 | 4.12E-06 | 9.35E-06 |
| 36h | 7.10E-06  | 1.08E-04 | 6.77E-06 | 6.57E-06 |
| 48h | 5.70E-06  | 2.23E-04 | 3.04E-06 | 3.62E-06 |
| 72h | 1.53E-06  | 4.99E-05 | 2.70E-06 | 1.74E-06 |
|     | cgd2_1030 |          |          |          |
| 2h  | 2.98E-05  | 1.19E-02 | 1.88E-05 | 1.07E-04 |
| 6h  | 8.27E-06  | 8.18E-04 | 1.45E-05 | 4.18E-05 |
| 12h | 5.16E-07  | 9.91E-05 | 4.68E-06 | 7.85E-06 |
| 24h | 7.28E-06  | 5.49E-04 | 5.59E-06 | 1.63E-05 |
| 36h | 1.09E-05  | 5.59E-03 | 1.06E-05 | 1.16E-05 |
| 48h | 3.11E-06  | 2.17E-03 | 2.00E-06 | 3.46E-06 |
| 72h | 8.84E-07  | 2.36E-03 | 1.07E-06 | 1.95E-06 |
|     | cgd2_110  |          |          |          |
| 2h  | 3.02E-07  | 1.69E-07 | 1.90E-07 | 3.58E-07 |
| 6h  | 7.67E-08  | 6.30E-08 | 3.35E-08 | 1.99E-07 |

|     |           |          |          |          |
|-----|-----------|----------|----------|----------|
| 12h | 1.38E-07  | 1.44E-07 | 3.16E-07 | 6.31E-08 |
| 24h | 5.93E-07  | 6.61E-07 | 2.11E-07 | 1.11E-07 |
| 36h | 7.78E-08  | 1.95E-07 | 7.98E-08 | 5.00E-08 |
| 48h | 6.08E-07  | 5.06E-08 | 7.00E-08 | 1.69E-07 |
| 72h | 3.53E-08  | 5.97E-08 | 3.07E-08 | 1.22E-06 |
|     | cgd2_1140 |          |          |          |
| 2h  | 0.00E+00  | 0.00E+00 | 0.00E+00 | 0.00E+00 |
| 6h  | 5.45E-08  | 2.97E-07 | 9.43E-07 | 8.72E-07 |
| 12h | 2.07E-08  | 3.73E-08 | 3.30E-07 | 2.87E-08 |
| 24h | 4.08E-08  | 4.41E-07 | 1.23E-06 | 9.30E-07 |
| 36h | 1.61E-07  | 4.79E-07 | 3.72E-07 | 2.84E-07 |
| 48h | 2.75E-07  | 1.52E-06 | 5.87E-07 | 8.81E-07 |
| 72h | 1.42E-08  | 3.83E-07 | 2.15E-07 | 2.83E-07 |
|     | cgd2_120  |          |          |          |
| 2h  | 7.36E-07  | 3.11E-06 | 5.50E-07 | 1.54E-06 |
| 6h  | 6.94E-06  | 6.49E-06 | 2.04E-05 | 7.87E-06 |
| 12h | 2.36E-07  | 5.04E-07 | 1.75E-06 | 5.49E-07 |
| 24h | 1.71E-06  | 1.98E-06 | 2.38E-06 | 1.44E-06 |
| 36h | 1.11E-06  | 1.76E-06 | 3.75E-07 | 3.74E-07 |
| 48h | 3.86E-07  | 5.77E-07 | 9.29E-07 | 7.12E-07 |
| 72h | 1.55E-07  | 1.55E-07 | 1.19E-07 | 1.48E-07 |
|     | cgd2_1210 |          |          |          |
| 2h  | 5.26E-07  | 2.58E-06 | 1.13E-05 | 5.55E-05 |
| 6h  | 2.83E-07  | 1.95E-06 | 5.70E-06 | 1.10E-05 |
| 12h | 2.00E-07  | 2.42E-07 | 1.31E-05 | 7.07E-06 |
| 24h | 6.06E-07  | 9.36E-06 | 7.07E-06 | 4.92E-06 |
| 36h | 1.20E-06  | 6.33E-06 | 4.44E-06 | 5.96E-06 |
| 48h | 8.88E-07  | 5.52E-06 | 2.43E-05 | 2.48E-05 |
| 72h | 7.36E-07  | 3.81E-06 | 2.59E-06 | 7.35E-06 |
|     | cgd2_130  |          |          |          |
| 2h  | 6.48E-05  | 3.14E-05 | 1.36E-04 | 4.48E-05 |
| 6h  | 5.13E-04  | 1.41E-03 | 3.47E-04 | 1.69E-03 |
| 12h | 2.56E-05  | 1.34E-03 | 5.51E-04 | 2.04E-05 |
| 24h | 1.62E-04  | 1.30E-03 | 1.55E-04 | 3.04E-04 |
| 36h | 9.44E-05  | 8.33E-04 | 1.15E-04 | 1.93E-04 |
| 48h | 3.21E-05  | 4.83E-04 | 4.99E-05 | 1.05E-04 |
| 72h | 7.03E-06  | 2.91E-04 | 3.84E-05 | 6.20E-06 |
|     | cgd2_1360 |          |          |          |
| 2h  | 5.64E-06  | 1.34E-05 | 1.09E-05 | 8.16E-06 |
| 6h  | 1.77E-06  | 4.74E-06 | 3.49E-06 | 7.46E-06 |
| 12h | 5.07E-06  | 5.12E-06 | 1.47E-05 | 7.52E-06 |
| 24h | 3.26E-06  | 4.48E-06 | 6.17E-06 | 6.25E-06 |
| 36h | 5.47E-06  | 5.14E-06 | 4.46E-06 | 3.54E-06 |
| 48h | 2.38E-06  | 1.45E-06 | 9.29E-06 | 1.01E-05 |
| 72h | 1.32E-06  | 5.82E-07 | 9.34E-07 | 1.16E-06 |
|     | cgd2_1390 |          |          |          |
| 2h  | 7.93E-08  | 1.90E-08 | 1.12E-07 | 2.89E-07 |
| 6h  | 2.98E-08  | 8.79E-08 | 2.23E-07 | 7.43E-07 |
| 12h | 2.90E-08  | 3.48E-08 | 2.70E-08 | 5.99E-08 |
| 24h | 1.59E-08  | 4.74E-08 | 1.36E-07 | 7.39E-08 |
| 36h | 1.73E-07  | 1.59E-07 | 2.42E-07 | 2.66E-07 |
| 48h | 2.18E-07  | 1.03E-07 | 2.92E-07 | 4.30E-07 |
| 72h | 2.62E-07  | 1.85E-07 | 5.64E-07 | 5.41E-07 |

|     |           |          |          |          |
|-----|-----------|----------|----------|----------|
|     | cgd2_1640 |          |          |          |
| 2h  | 0.00E+00  | 0.00E+00 | 0.00E+00 | 0.00E+00 |
| 6h  | 1.65E-05  | 3.43E-06 | 1.10E-07 | 1.32E-07 |
| 12h | 3.24E-04  | 1.67E-06 | 1.49E-07 | 2.70E-07 |
| 24h | 7.64E-05  | 1.30E-04 | 1.72E-07 | 9.67E-08 |
| 36h | 1.17E-03  | 8.52E-05 | 8.14E-07 | 4.90E-07 |
| 48h | 7.55E-04  | 2.06E-05 | 4.98E-08 | 1.36E-07 |
| 72h | 3.94E-05  | 5.14E-05 | 2.03E-06 | 8.61E-07 |
|     | cgd2_170  |          |          |          |
| 2h  | 4.06E-06  | 4.55E-06 | 1.23E-05 | 9.40E-06 |
| 6h  | 1.69E-05  | 1.89E-05 | 3.85E-05 | 2.98E-05 |
| 12h | 1.11E-06  | 7.03E-07 | 1.56E-05 | 7.56E-06 |
| 24h | 5.24E-06  | 5.24E-06 | 1.02E-05 | 8.99E-06 |
| 36h | 7.42E-06  | 1.92E-06 | 5.72E-06 | 8.21E-06 |
| 48h | 1.76E-06  | 1.14E-06 | 1.98E-06 | 2.34E-06 |
| 72h | 7.14E-07  | 3.32E-07 | 5.05E-07 | 5.28E-07 |
|     | cgd2_1790 |          |          |          |
| 2h  | 1.23E-05  | 5.70E-05 | 1.43E-04 | 1.03E-04 |
| 6h  | 1.11E-06  | 5.78E-05 | 2.02E-04 | 3.20E-04 |
| 12h | 2.22E-06  | 3.40E-05 | 4.00E-04 | 8.07E-06 |
| 24h | 1.61E-05  | 7.83E-05 | 1.19E-04 | 1.61E-04 |
| 36h | 1.84E-06  | 7.50E-05 | 3.88E-04 | 6.02E-04 |
| 48h | 5.48E-06  | 3.47E-05 | 7.82E-05 | 2.26E-05 |
| 72h | 8.64E-07  | 1.49E-05 | 3.60E-05 | 8.40E-06 |
|     | cgd2_1860 |          |          |          |
| 2h  | 2.14E-03  | 2.98E-04 | 8.00E-07 | 2.10E-06 |
| 6h  | 2.69E-04  | 8.68E-04 | 1.75E-06 | 7.16E-06 |
| 12h | 4.73E-05  | 8.30E-05 | 1.89E-06 | 1.63E-06 |
| 24h | 3.95E-04  | 8.82E-04 | 1.61E-06 | 2.31E-06 |
| 36h | 2.00E-04  | 8.11E-05 | 2.24E-06 | 1.34E-06 |
| 48h | 5.21E-04  | 3.05E-04 | 2.94E-07 | 4.41E-06 |
| 72h | 2.74E-05  | 1.92E-04 | 6.25E-07 | 5.34E-06 |
|     | cgd2_1890 |          |          |          |
| 2h  | 8.66E-09  | 3.64E-08 | 9.02E-06 | 1.03E-06 |
| 6h  | 7.84E-08  | 1.09E-07 | 8.73E-07 | 1.96E-06 |
| 12h | 1.36E-07  | 3.21E-08 | 3.19E-07 | 8.93E-08 |
| 24h | 5.24E-08  | 4.45E-08 | 3.70E-07 | 2.71E-07 |
| 36h | 2.91E-07  | 1.62E-07 | 2.12E-06 | 3.15E-06 |
| 48h | 3.31E-07  | 1.31E-07 | 2.59E-06 | 1.41E-06 |
| 72h | 6.51E-07  | 3.93E-07 | 2.18E-06 | 1.48E-06 |
|     | cgd2_210  |          |          |          |
| 2h  | 1.29E-06  | 4.10E-07 | 1.43E-07 | 3.92E-07 |
| 6h  | 5.12E-05  | 5.75E-07 | 3.40E-06 | 1.47E-06 |
| 12h | 1.49E-07  | 1.05E-08 | 1.94E-07 | 2.19E-07 |
| 24h | 1.42E-06  | 2.44E-07 | 1.37E-06 | 7.04E-07 |
| 36h | 6.04E-07  | 4.55E-07 | 1.12E-06 | 2.57E-07 |
| 48h | 3.89E-06  | 1.45E-06 | 1.23E-06 | 3.64E-07 |
| 72h | 1.07E-06  | 2.49E-07 | 2.07E-07 | 2.33E-07 |
|     | cgd2_2120 |          |          |          |
| 2h  | 0.00E+00  | 3.32E-09 | 0.00E+00 | 3.05E-08 |
| 6h  | 0.00E+00  | 7.47E-09 | 1.34E-08 | 2.83E-08 |
| 12h | 3.62E-04  | 3.20E-04 | 1.06E-04 | 6.99E-05 |
| 24h | 5.63E-05  | 6.83E-05 | 9.46E-05 | 3.42E-05 |

|     |           |          |          |          |
|-----|-----------|----------|----------|----------|
| 36h | 3.73E-04  | 1.31E-04 | 2.12E-04 | 2.09E-04 |
| 48h | 7.04E-04  | 1.41E-04 | 1.99E-04 | 1.74E-04 |
| 72h | 9.67E-04  | 9.74E-05 | 2.18E-04 | 1.13E-04 |
|     | cgd2_2190 |          |          |          |
| 2h  | 3.42E-04  | 1.17E-06 | 1.14E-06 | 1.94E-06 |
| 6h  | 7.88E-05  | 1.65E-06 | 9.22E-07 | 1.51E-06 |
| 12h | 7.06E-05  | 5.54E-07 | 1.00E-06 | 8.16E-07 |
| 24h | 1.01E-04  | 1.67E-06 | 2.68E-06 | 1.12E-06 |
| 36h | 2.72E-05  | 8.37E-07 | 1.18E-06 | 1.40E-06 |
| 48h | 9.86E-05  | 1.30E-06 | 2.51E-06 | 1.11E-06 |
| 72h | 1.04E-04  | 6.63E-07 | 2.87E-07 | 3.84E-07 |
|     | cgd2_220  |          |          |          |
| 2h  | 2.89E-04  | 6.05E-05 | 1.58E-05 | 3.05E-05 |
| 6h  | 7.20E-04  | 1.13E-04 | 2.12E-04 | 2.29E-04 |
| 12h | 2.44E-04  | 1.77E-06 | 2.96E-05 | 1.64E-05 |
| 24h | 9.31E-05  | 1.50E-05 | 1.09E-04 | 4.26E-05 |
| 36h | 1.93E-04  | 2.60E-05 | 4.34E-05 | 4.33E-05 |
| 48h | 4.21E-04  | 1.32E-05 | 3.36E-05 | 3.12E-05 |
| 72h | 5.91E-04  | 1.99E-05 | 4.21E-05 | 1.79E-05 |
|     | cgd2_230  |          |          |          |
| 2h  | 1.72E-06  | 8.10E-04 | 3.31E-04 | 6.35E-02 |
| 6h  | 3.47E-07  | 1.51E-04 | 9.79E-05 | 1.17E-05 |
| 12h | 5.82E-07  | 1.02E-03 | 3.78E-04 | 1.03E-05 |
| 24h | 2.95E-06  | 2.14E-04 | 5.67E-04 | 1.82E-06 |
| 36h | 2.40E-07  | 6.34E-04 | 3.98E-04 | 1.18E-03 |
| 48h | 6.58E-07  | 2.94E-04 | 1.78E-04 | 2.35E-04 |
| 72h | 6.14E-07  | 3.07E-04 | 3.71E-04 | 6.52E-05 |
|     | cgd2_2300 |          |          |          |
| 2h  | 3.14E-05  | 1.41E-05 | 7.58E-05 | 1.32E-04 |
| 6h  | 7.09E-05  | 2.53E-05 | 3.65E-05 | 7.75E-05 |
| 12h | 1.72E-05  | 4.37E-05 | 8.44E-05 | 1.14E-04 |
| 24h | 1.57E-05  | 3.85E-05 | 1.84E-04 | 4.22E-05 |
| 36h | 8.69E-06  | 5.76E-05 | 1.73E-04 | 9.84E-05 |
| 48h | 4.70E-06  | 5.33E-05 | 4.49E-04 | 1.38E-04 |
| 72h | 2.08E-05  | 3.13E-05 | 1.34E-04 | 4.71E-05 |
|     | cgd2_2310 |          |          |          |
| 2h  | 1.34E-08  | 2.19E-09 | 2.29E-09 | 7.78E-08 |
| 6h  | 2.22E-08  | 9.66E-09 | 9.53E-09 | 3.04E-08 |
| 12h | 7.33E-08  | 5.84E-08 | 8.14E-08 | 9.27E-08 |
| 24h | 8.06E-08  | 3.93E-08 | 6.12E-08 | 2.15E-08 |
| 36h | 2.32E-08  | 2.35E-08 | 1.31E-07 | 8.78E-08 |
| 48h | 7.04E-08  | 2.74E-08 | 5.19E-08 | 4.30E-08 |
| 72h | 2.28E-08  | 1.68E-08 | 1.04E-08 | 3.37E-08 |
|     | cgd2_2400 |          |          |          |
| 2h  | 4.32E-04  | 1.83E-04 | 1.65E-04 | 9.36E-04 |
| 6h  | 2.59E-05  | 1.48E-04 | 3.27E-04 | 5.01E-04 |
| 12h | 3.40E-04  | 1.69E-04 | 3.11E-04 | 2.44E-04 |
| 24h | 1.02E-04  | 1.20E-04 | 2.94E-04 | 1.58E-04 |
| 36h | 8.28E-05  | 8.55E-05 | 2.97E-04 | 1.76E-04 |
| 48h | 1.02E-04  | 4.16E-05 | 1.65E-04 | 1.93E-04 |
| 72h | 4.26E-05  | 2.61E-05 | 4.00E-05 | 3.00E-05 |
|     | cgd2_2420 |          |          |          |
| 2h  | 0.00E+00  | 7.92E-04 | 8.91E-04 | 4.06E-03 |

|     |           |          |          |          |
|-----|-----------|----------|----------|----------|
| 6h  | 6.74E-05  | 7.34E-04 | 2.63E-03 | 3.79E-03 |
| 12h | 1.44E-05  | 1.37E-03 | 4.22E-03 | 1.52E-03 |
| 24h | 4.36E-06  | 8.28E-04 | 2.64E-03 | 8.76E-04 |
| 36h | 2.44E-06  | 3.59E-04 | 2.14E-03 | 1.07E-03 |
| 48h | 6.69E-06  | 4.70E-04 | 8.42E-04 | 9.91E-04 |
| 72h | 2.98E-06  | 6.33E-04 | 6.87E-04 | 4.35E-04 |
|     | cgd2_2440 |          |          |          |
| 2h  | 3.18E-06  | 8.04E-07 | 1.04E-06 | 1.51E-06 |
| 6h  | 1.28E-06  | 8.75E-07 | 1.65E-06 | 1.61E-06 |
| 12h | 4.58E-06  | 1.05E-06 | 6.00E-06 | 6.17E-06 |
| 24h | 3.25E-06  | 1.69E-06 | 1.53E-06 | 2.09E-06 |
| 36h | 1.27E-06  | 7.53E-07 | 3.11E-06 | 2.52E-06 |
| 48h | 2.64E-06  | 7.74E-07 | 1.06E-06 | 1.26E-06 |
| 72h | 1.30E-06  | 4.32E-07 | 4.85E-07 | 4.19E-07 |
|     | cgd2_2560 |          |          |          |
| 2h  | 2.82E-03  | 2.38E-04 | 3.09E-04 | 1.03E-03 |
| 6h  | 2.01E-03  | 1.50E-04 | 2.32E-04 | 4.65E-04 |
| 12h | 8.56E-04  | 1.18E-05 | 2.36E-04 | 1.09E-04 |
| 24h | 2.64E-04  | 4.62E-05 | 2.14E-04 | 9.80E-05 |
| 36h | 1.36E-04  | 1.03E-04 | 3.47E-04 | 2.04E-04 |
| 48h | 1.20E-03  | 3.66E-05 | 1.06E-04 | 1.41E-04 |
| 72h | 4.68E-04  | 2.37E-05 | 2.25E-05 | 2.06E-05 |
|     | cgd2_270  |          |          |          |
| 2h  | 1.63E-05  | 1.47E-05 | 1.11E-05 | 5.72E-06 |
| 6h  | 1.63E-05  | 1.85E-05 | 1.11E-05 | 4.22E-05 |
| 12h | 1.99E-06  | 1.55E-06 | 6.81E-06 | 5.08E-06 |
| 24h | 6.53E-06  | 4.67E-06 | 1.27E-05 | 1.75E-05 |
| 36h | 8.04E-06  | 3.42E-06 | 3.73E-06 | 4.26E-06 |
| 48h | 4.57E-06  | 1.81E-06 | 5.78E-06 | 1.28E-06 |
| 72h | 1.26E-06  | 4.30E-07 | 7.35E-07 | 4.26E-06 |
|     | cgd2_2850 |          |          |          |
| 2h  | 1.49E-07  | 3.34E-08 | 0.00E+00 | 1.15E-08 |
| 6h  | 3.88E-07  | 8.87E-08 | 5.45E-08 | 1.81E-08 |
| 12h | 3.98E-08  | 2.63E-08 | 7.64E-08 | 4.16E-08 |
| 24h | 5.21E-08  | 1.84E-08 | 5.23E-08 | 1.52E-07 |
| 36h | 8.54E-08  | 4.32E-08 | 7.65E-08 | 1.28E-07 |
| 48h | 5.68E-07  | 1.37E-07 | 3.37E-07 | 1.29E-07 |
| 72h | 8.44E-08  | 6.02E-08 | 1.40E-07 | 3.59E-07 |
|     | cgd2_2900 |          |          |          |
| 2h  | 6.13E-09  | 2.57E-09 | 0.00E+00 | 1.73E-08 |
| 6h  | 2.09E-08  | 5.24E-09 | 1.96E-08 | 5.94E-08 |
| 12h | 2.29E-06  | 4.39E-07 | 6.81E-07 | 1.16E-06 |
| 24h | 5.15E-07  | 7.79E-08 | 3.07E-07 | 5.52E-07 |
| 36h | 6.50E-07  | 2.94E-07 | 1.64E-06 | 7.00E-06 |
| 48h | 4.21E-07  | 1.65E-07 | 6.11E-07 | 4.87E-07 |
| 72h | 1.16E-06  | 4.57E-07 | 1.72E-06 | 1.35E-06 |
|     | cgd2_2950 |          |          |          |
| 2h  | 1.07E-03  | 6.82E-05 | 4.86E-04 | 1.06E-03 |
| 6h  | 1.56E-03  | 5.71E-05 | 8.42E-04 | 1.60E-04 |
| 12h | 1.64E-04  | 3.47E-06 | 1.85E-04 | 1.87E-04 |
| 24h | 1.44E-04  | 6.84E-06 | 2.78E-04 | 7.69E-04 |
| 36h | 1.91E-04  | 8.54E-05 | 3.31E-04 | 7.36E-03 |
| 48h | 2.28E-04  | 2.78E-05 | 2.75E-04 | 5.46E-04 |

|     |           |          |          |          |
|-----|-----------|----------|----------|----------|
| 72h | 8.61E-05  | 3.81E-05 | 7.04E-05 | 3.84E-06 |
|     | cgd2_300  |          |          |          |
| 2h  | 5.12E-06  | 1.03E-06 | 1.78E-06 | 1.35E-05 |
| 6h  | 1.48E-05  | 4.48E-06 | 7.32E-06 | 3.90E-05 |
| 12h | 2.74E-07  | 2.49E-08 | 2.20E-06 | 1.01E-05 |
| 24h | 2.20E-06  | 6.52E-07 | 6.50E-06 | 7.79E-06 |
| 36h | 2.19E-06  | 2.14E-06 | 2.16E-06 | 9.85E-06 |
| 48h | 3.03E-06  | 1.17E-06 | 1.99E-06 | 1.92E-06 |
| 72h | 4.67E-07  | 4.83E-07 | 8.56E-07 | 1.56E-06 |
|     | cgd2_310  |          |          |          |
| 2h  | 4.60E-05  | 6.84E-06 | 1.12E-05 | 1.45E-04 |
| 6h  | 1.05E-05  | 1.54E-06 | 2.54E-06 | 1.28E-04 |
| 12h | 2.28E-05  | 8.17E-07 | 2.51E-05 | 1.94E-05 |
| 24h | 1.34E-05  | 2.41E-06 | 1.24E-05 | 1.71E-05 |
| 36h | 6.00E-06  | 3.70E-06 | 1.27E-05 | 1.08E-05 |
| 48h | 1.92E-05  | 4.95E-06 | 2.45E-05 | 1.52E-05 |
| 72h | 2.58E-05  | 2.26E-06 | 7.30E-06 | 3.11E-05 |
|     | cgd2_3120 |          |          |          |
| 2h  | 1.63E-06  | 1.00E-06 | 1.18E-06 | 1.25E-06 |
| 6h  | 3.64E-07  | 1.60E-07 | 4.33E-07 | 7.43E-07 |
| 12h | 7.67E-07  | 2.92E-07 | 4.60E-07 | 1.40E-06 |
| 24h | 7.78E-07  | 3.13E-07 | 1.74E-07 | 8.68E-07 |
| 36h | 1.88E-07  | 1.57E-07 | 2.69E-07 | 6.42E-07 |
| 48h | 4.47E-07  | 3.75E-07 | 2.46E-07 | 4.01E-07 |
| 72h | 3.24E-07  | 3.57E-07 | 7.69E-07 | 5.01E-07 |
|     | cgd2_3410 |          |          |          |
| 2h  | 2.16E-06  | 6.07E-07 | 5.44E-07 | 1.12E-06 |
| 6h  | 1.16E-05  | 7.84E-06 | 2.45E-05 | 5.15E-05 |
| 12h | 4.13E-07  | 3.03E-07 | 1.21E-06 | 1.90E-06 |
| 24h | 4.95E-07  | 7.17E-07 | 6.54E-06 | 2.11E-05 |
| 36h | 1.31E-06  | 1.92E-06 | 2.74E-06 | 4.06E-06 |
| 48h | 2.73E-06  | 3.77E-06 | 5.50E-06 | 1.27E-05 |
| 72h | 1.22E-06  | 1.61E-06 | 5.06E-06 | 2.89E-06 |
|     | cgd2_3520 |          |          |          |
| 2h  | 1.18E-07  | 3.62E-07 | 2.71E-07 | 1.68E-07 |
| 6h  | 5.46E-08  | 2.39E-08 | 4.90E-09 | 7.00E-09 |
| 12h | 9.45E-09  | 3.39E-08 | 2.03E-08 | 1.10E-08 |
| 24h | 1.19E-07  | 8.45E-09 | 1.33E-08 | 3.78E-08 |
| 36h | 2.72E-08  | 9.70E-08 | 4.31E-08 | 7.17E-08 |
| 48h | 1.99E-08  | 1.83E-08 | 3.15E-08 | 9.60E-08 |
| 72h | 2.44E-08  | 9.30E-08 | 3.87E-08 | 4.47E-07 |
|     | cgd2_360  |          |          |          |
| 2h  | 6.92E-06  | 4.72E-06 | 3.45E-06 | 3.69E-06 |
| 6h  | 1.90E-04  | 1.74E-05 | 2.31E-05 | 3.65E-05 |
| 12h | 1.66E-06  | 2.84E-07 | 5.13E-06 | 3.59E-06 |
| 24h | 3.96E-06  | 3.50E-06 | 9.42E-06 | 7.06E-06 |
| 36h | 2.00E-06  | 2.60E-06 | 2.41E-06 | 3.66E-06 |
| 48h | 1.10E-06  | 1.04E-06 | 3.41E-06 | 2.12E-06 |
| 72h | 6.10E-07  | 6.68E-07 | 4.82E-07 | 8.03E-07 |
|     | cgd2_3740 |          |          |          |
| 2h  | 7.39E-07  | 1.80E-07 | 1.19E-07 | 4.52E-07 |
| 6h  | 3.27E-08  | 3.83E-08 | 4.42E-08 | 1.44E-07 |
| 12h | 3.47E-07  | 1.91E-07 | 7.99E-07 | 7.36E-07 |

|     |           |          |          |          |
|-----|-----------|----------|----------|----------|
| 24h | 3.02E-07  | 6.94E-07 | 1.65E-07 | 1.98E-07 |
| 36h | 4.94E-07  | 4.94E-07 | 1.25E-06 | 1.51E-06 |
| 48h | 1.86E-07  | 3.11E-07 | 4.04E-07 | 1.08E-06 |
| 72h | 2.74E-07  | 6.01E-07 | 6.49E-07 | 7.02E-07 |
|     | cgd2_3940 |          |          |          |
| 2h  | 0.00E+00  | 0.00E+00 | 0.00E+00 | 0.00E+00 |
| 6h  | 3.47E-07  | 0.00E+00 | 0.00E+00 | 0.00E+00 |
| 12h | 1.41E-06  | 1.43E-05 | 6.42E-06 | 2.05E-05 |
| 24h | 4.94E-06  | 6.12E-06 | 7.83E-06 | 8.14E-06 |
| 36h | 7.86E-06  | 3.21E-05 | 3.33E-05 | 1.90E-04 |
| 48h | 6.59E-05  | 1.68E-04 | 1.55E-04 | 3.76E-04 |
| 72h | 2.15E-05  | 8.54E-05 | 1.02E-04 | 1.36E-04 |
|     | cgd2_40   |          |          |          |
| 2h  | 1.30E-06  | 9.68E-07 | 0.00E+00 | 4.46E-07 |
| 6h  | 2.19E-06  | 3.52E-06 | 6.39E-06 | 1.93E-05 |
| 12h | 3.13E-06  | 5.17E-07 | 4.44E-08 | 1.44E-07 |
| 24h | 6.11E-07  | 6.51E-07 | 3.67E-06 | 7.51E-06 |
| 36h | 3.19E-06  | 4.13E-06 | 6.49E-06 | 6.92E-06 |
| 48h | 1.89E-06  | 3.53E-06 | 5.69E-06 | 5.68E-06 |
| 72h | 8.40E-06  | 9.09E-06 | 1.75E-05 | 5.79E-06 |
|     | cgd2_410  |          |          |          |
| 2h  | 6.33E-05  | 6.14E-05 | 3.86E-05 | 3.96E-05 |
| 6h  | 4.69E-05  | 6.12E-05 | 2.45E-05 | 4.78E-05 |
| 12h | 2.11E-06  | 2.50E-06 | 4.52E-06 | 6.47E-06 |
| 24h | 4.59E-06  | 3.67E-06 | 8.95E-06 | 6.86E-06 |
| 36h | 2.71E-06  | 3.52E-06 | 3.37E-06 | 3.79E-06 |
| 48h | 1.04E-06  | 1.57E-06 | 3.05E-06 | 2.60E-06 |
| 72h | 1.22E-07  | 3.36E-07 | 1.56E-07 | 2.46E-07 |
|     | cgd2_4120 |          |          |          |
| 2h  | 0.00E+00  | 3.30E-06 | 2.64E-05 | 1.56E-05 |
| 6h  | 1.38E-03  | 1.79E-03 | 2.47E-03 | 3.08E-03 |
| 12h | 1.54E-04  | 6.84E-04 | 5.50E-04 | 6.82E-04 |
| 24h | 6.23E-05  | 1.08E-04 | 7.51E-04 | 4.04E-04 |
| 36h | 2.00E-04  | 4.16E-04 | 8.32E-04 | 7.05E-04 |
| 48h | 1.15E-04  | 2.68E-04 | 5.03E-04 | 4.14E-04 |
| 72h | 6.78E-05  | 2.12E-04 | 2.96E-04 | 1.37E-04 |
|     | cgd2_4140 |          |          |          |
| 2h  | 7.53E-02  | 1.45E-04 | 4.31E-05 | 2.94E-06 |
| 6h  | 3.89E-04  | 2.23E-04 | 7.33E-04 | 1.59E-06 |
| 12h | 3.10E-04  | 3.65E-04 | 2.30E-04 | 6.10E-04 |
| 24h | 9.72E-05  | 3.59E-05 | 2.22E-04 | 5.64E-06 |
| 36h | 1.46E-04  | 1.15E-04 | 1.82E-04 | 4.14E-06 |
| 48h | 1.98E-04  | 9.24E-05 | 1.42E-04 | 6.83E-06 |
| 72h | 1.06E-04  | 2.75E-04 | 1.28E-04 | 9.76E-07 |
|     | cgd2_4170 |          |          |          |
| 2h  | 1.58E-06  | 8.72E-07 | 1.15E-06 | 2.53E-06 |
| 6h  | 5.26E-07  | 2.46E-07 | 4.06E-07 | 8.09E-07 |
| 12h | 2.59E-06  | 2.49E-06 | 7.50E-06 | 3.96E-06 |
| 24h | 3.61E-07  | 1.23E-06 | 7.40E-07 | 8.69E-07 |
| 36h | 4.09E-07  | 9.51E-07 | 1.58E-06 | 1.56E-06 |
| 48h | 2.99E-07  | 3.13E-07 | 9.48E-07 | 1.11E-06 |
| 72h | 1.17E-07  | 1.40E-06 | 7.43E-07 | 6.12E-07 |
|     | cgd2_420  |          |          |          |

|     |          |          |          |          |
|-----|----------|----------|----------|----------|
| 2h  | 7.32E-06 | 6.09E-06 | 1.34E-05 | 9.23E-06 |
| 6h  | 8.28E-06 | 3.95E-06 | 1.70E-06 | 3.77E-06 |
| 12h | 7.55E-06 | 9.94E-06 | 1.07E-05 | 7.31E-06 |
| 24h | 1.08E-05 | 1.38E-05 | 5.79E-06 | 8.47E-06 |
| 36h | 2.78E-06 | 4.10E-06 | 5.37E-06 | 6.90E-06 |
| 48h | 2.20E-06 | 4.98E-06 | 5.40E-06 | 5.70E-06 |
| 72h | 1.70E-06 | 2.15E-06 | 1.62E-06 | 1.58E-06 |
|     | cgd2_430 |          |          |          |
| 2h  | 4.86E-06 | 2.73E-06 | 7.60E-06 | 1.03E-05 |
| 6h  | 3.16E-06 | 1.54E-06 | 5.24E-07 | 2.48E-06 |
| 12h | 1.56E-06 | 2.68E-06 | 1.30E-06 | 2.05E-06 |
| 24h | 1.14E-06 | 1.14E-06 | 5.08E-07 | 1.07E-06 |
| 36h | 8.06E-07 | 7.38E-07 | 7.22E-07 | 1.05E-06 |
| 48h | 6.75E-07 | 6.38E-07 | 5.29E-07 | 8.52E-07 |
| 72h | 7.86E-07 | 1.20E-06 | 8.14E-07 | 6.49E-07 |
|     | cgd2_450 |          |          |          |
| 2h  | 2.99E-06 | 4.43E-06 | 3.74E-06 | 2.06E-06 |
| 6h  | 2.15E-05 | 1.68E-05 | 6.36E-06 | 7.45E-06 |
| 12h | 4.41E-07 | 2.50E-07 | 1.30E-06 | 1.18E-06 |
| 24h | 6.15E-07 | 6.66E-07 | 1.40E-06 | 1.38E-06 |
| 36h | 7.91E-07 | 8.23E-07 | 1.44E-06 | 1.34E-06 |
| 48h | 4.02E-07 | 1.06E-06 | 8.48E-07 | 5.44E-07 |
| 72h | 1.48E-07 | 1.23E-07 | 3.06E-07 | 9.64E-08 |
|     | cgd2_480 |          |          |          |
| 2h  | 0.00E+00 | 0.00E+00 | 0.00E+00 | 4.93E-09 |
| 6h  | 2.82E-07 | 1.60E-07 | 2.38E-07 | 2.17E-07 |
| 12h | 1.31E-07 | 5.20E-08 | 8.15E-08 | 7.65E-08 |
| 24h | 1.77E-08 | 5.68E-08 | 1.62E-07 | 9.88E-08 |
| 36h | 3.57E-07 | 3.24E-07 | 4.54E-07 | 5.38E-07 |
| 48h | 9.12E-08 | 1.09E-07 | 1.96E-07 | 1.88E-07 |
| 72h | 4.43E-07 | 5.41E-07 | 8.28E-07 | 4.88E-07 |
|     | cgd2_490 |          |          |          |
| 2h  | 0.00E+00 | 2.41E-09 | 0.00E+00 | 2.02E-08 |
| 6h  | 0.00E+00 | 0.00E+00 | 1.69E-08 | 1.52E-08 |
| 12h | 0.00E+00 | 0.00E+00 | 0.00E+00 | 0.00E+00 |
| 24h | 3.32E-09 | 8.05E-09 | 3.05E-08 | 2.57E-08 |
| 36h | 1.70E-08 | 5.19E-08 | 4.63E-08 | 1.13E-07 |
| 48h | 1.98E-06 | 2.52E-06 | 2.83E-05 | 5.14E-06 |
| 72h | 6.11E-06 | 1.09E-05 | 4.15E-05 | 1.58E-05 |
|     | cgd2_50  |          |          |          |
| 2h  | 5.09E-03 | 8.94E-04 | 2.10E-04 | 7.46E-05 |
| 6h  | 1.20E-03 | 2.01E-03 | 3.20E-04 | 5.77E-04 |
| 12h | 1.28E-03 | 1.47E-03 | 1.04E-04 | 1.66E-03 |
| 24h | 4.21E-03 | 1.11E-03 | 3.10E-05 | 3.89E-05 |
| 36h | 8.19E-04 | 1.02E-03 | 4.23E-05 | 1.98E-04 |
| 48h | 1.41E-03 | 1.89E-03 | 1.20E-04 | 7.61E-05 |
| 72h | 8.29E-04 | 2.25E-04 | 6.91E-06 | 4.94E-05 |
|     | cgd2_610 |          |          |          |
| 2h  | 0.00E+00 | 0.00E+00 | 0.00E+00 | 0.00E+00 |
| 6h  | 0.00E+00 | 2.58E-08 | 6.78E-08 | 3.61E-06 |
| 12h | 8.00E-07 | 7.25E-06 | 2.45E-05 | 4.09E-05 |
| 24h | 5.14E-07 | 2.08E-06 | 6.96E-06 | 3.87E-06 |
| 36h | 1.77E-06 | 1.70E-05 | 2.38E-05 | 2.85E-05 |



|     |          |          |          |          |
|-----|----------|----------|----------|----------|
| 48h | 2.28E-06 | 3.83E-05 | 2.77E-05 | 1.89E-05 |
| 72h | 5.87E-07 | 1.09E-05 | 3.81E-05 | 1.16E-05 |
|     | cgd2_620 |          |          |          |
| 2h  | 8.04E-07 | 1.86E-06 | 4.55E-07 | 3.96E-06 |
| 6h  | 3.53E-05 | 9.33E-05 | 4.97E-04 | 5.20E-04 |
| 12h | 1.91E-06 | 7.42E-06 | 4.61E-05 | 2.33E-05 |
| 24h | 3.68E-06 | 1.05E-05 | 1.01E-04 | 9.58E-05 |
| 36h | 1.20E-05 | 3.41E-05 | 4.71E-05 | 3.03E-05 |
| 48h | 5.54E-06 | 2.10E-05 | 8.20E-05 | 5.37E-05 |
| 72h | 1.00E-06 | 5.40E-06 | 7.00E-06 | 3.59E-06 |
|     | cgd2_640 |          |          |          |
| 2h  | 0.00E+00 | 1.18E-08 | 0.00E+00 | 1.58E-09 |
| 6h  | 0.00E+00 | 0.00E+00 | 0.00E+00 | 0.00E+00 |
| 12h | 1.26E-05 | 3.36E-05 | 1.71E-05 | 3.23E-05 |
| 24h | 1.79E-06 | 2.79E-06 | 6.17E-06 | 4.30E-06 |
| 36h | 2.65E-06 | 7.06E-06 | 1.06E-05 | 1.10E-05 |
| 48h | 1.24E-06 | 1.29E-06 | 6.79E-06 | 6.25E-06 |
| 72h | 4.24E-07 | 6.93E-07 | 8.66E-07 | 4.32E-07 |
|     | cgd2_70  |          |          |          |
| 2h  | 1.23E-06 | 1.15E-06 | 9.35E-07 | 1.62E-06 |
| 6h  | 2.89E-07 | 3.56E-07 | 4.55E-07 | 4.82E-07 |
| 12h | 2.41E-06 | 3.23E-04 | 2.03E-06 | 2.96E-06 |
| 24h | 1.37E-06 | 1.68E-06 | 1.40E-06 | 2.82E-06 |
| 36h | 9.86E-07 | 5.66E-07 | 3.56E-07 | 5.87E-07 |
| 48h | 1.12E-06 | 5.99E-07 | 2.37E-06 | 1.77E-06 |
| 72h | 8.28E-06 | 4.97E-06 | 6.74E-06 | 6.00E-06 |
|     | cgd2_720 |          |          |          |
| 2h  | 2.57E-04 | 2.21E-03 | 1.38E-05 | 8.74E-04 |
| 6h  | 8.22E-05 | 5.42E-04 | 1.08E-03 | 1.84E-05 |
| 12h | 1.68E-05 | 2.26E-04 | 4.63E-04 | 1.43E-04 |
| 24h | 7.11E-05 | 5.38E-04 | 5.54E-04 | 5.61E-04 |
| 36h | 3.31E-05 | 4.73E-04 | 5.94E-04 | 3.50E-04 |
| 48h | 5.70E-05 | 5.40E-04 | 2.23E-04 | 3.80E-04 |
| 72h | 1.78E-05 | 6.53E-05 | 3.07E-04 | 2.62E-05 |
|     | cgd2_730 |          |          |          |
| 2h  | 1.34E-03 | 5.41E-06 | 0.00E+00 | 3.82E-06 |
| 6h  | 9.42E-04 | 5.52E-05 | 4.71E-06 | 5.54E-06 |
| 12h | 7.19E-05 | 4.87E-06 | 1.26E-06 | 2.07E-06 |
| 24h | 6.95E-04 | 1.85E-05 | 3.72E-06 | 4.58E-06 |
| 36h | 1.26E-04 | 4.84E-05 | 8.85E-07 | 1.25E-06 |
| 48h | 7.69E-04 | 1.17E-04 | 1.25E-06 | 3.20E-06 |
| 72h | 1.24E-03 | 3.23E-05 | 1.60E-06 | 2.30E-06 |
|     | cgd2_740 |          |          |          |
| 2h  | 2.85E-08 | 5.59E-08 | 3.58E-07 | 1.76E-06 |
| 6h  | 0.00E+00 | 3.41E-09 | 1.75E-09 | 5.28E-07 |
| 12h | 3.67E-06 | 1.48E-05 | 9.11E-05 | 9.62E-05 |
| 24h | 2.65E-06 | 3.00E-06 | 8.45E-06 | 9.60E-06 |
| 36h | 2.60E-06 | 4.23E-06 | 8.04E-05 | 1.04E-04 |
| 48h | 3.61E-06 | 2.39E-06 | 1.30E-05 | 1.47E-05 |
| 72h | 1.28E-06 | 1.37E-06 | 1.54E-05 | 1.12E-05 |
|     | cgd2_750 |          |          |          |
| 2h  | 4.82E-08 | 1.20E-07 | 7.04E-07 | 5.32E-07 |
| 6h  | 2.98E-06 | 2.74E-06 | 4.49E-05 | 1.98E-04 |

|     |          |          |          |          |
|-----|----------|----------|----------|----------|
| 12h | 6.67E-08 | 2.13E-08 | 6.48E-06 | 2.23E-05 |
| 24h | 1.74E-07 | 4.42E-07 | 3.10E-05 | 6.01E-05 |
| 36h | 6.47E-07 | 2.28E-06 | 8.42E-06 | 1.72E-05 |
| 48h | 1.05E-06 | 2.35E-06 | 2.70E-05 | 7.10E-05 |
| 72h | 1.30E-06 | 2.59E-06 | 2.88E-05 | 2.77E-05 |
|     | cgd2_760 |          |          |          |
| 2h  | 1.03E-08 | 2.70E-09 | 3.14E-08 | 2.32E-08 |
| 6h  | 3.51E-07 | 1.18E-07 | 5.99E-07 | 1.35E-06 |
| 12h | 2.63E-08 | 1.37E-08 | 3.40E-08 | 1.90E-07 |
| 24h | 1.69E-07 | 1.77E-08 | 2.25E-07 | 2.43E-07 |
| 36h | 1.32E-07 | 2.07E-07 | 4.26E-07 | 2.75E-07 |
| 48h | 3.64E-07 | 1.14E-07 | 4.04E-07 | 7.00E-07 |
| 72h | 1.89E-07 | 2.00E-07 | 1.74E-07 | 1.47E-07 |
|     | cgd2_770 |          |          |          |
| 2h  | 1.55E-07 | 8.57E-08 | 2.03E-05 | 1.64E-06 |
| 6h  | 2.98E-07 | 7.46E-08 | 5.24E-07 | 1.46E-06 |
| 12h | 1.25E-08 | 4.81E-08 | 1.42E-07 | 1.82E-07 |
| 24h | 1.35E-07 | 3.16E-08 | 3.31E-07 | 4.73E-07 |
| 36h | 2.86E-07 | 2.56E-07 | 9.74E-07 | 1.28E-06 |
| 48h | 1.68E-07 | 1.49E-07 | 8.74E-07 | 2.11E-06 |
| 72h | 1.93E-07 | 1.96E-07 | 6.46E-07 | 6.68E-07 |
|     | cgd2_810 |          |          |          |
| 2h  | 1.54E-07 | 3.06E-08 | 1.15E-08 | 4.53E-09 |
| 6h  | 9.75E-06 | 8.25E-08 | 4.95E-07 | 7.51E-08 |
| 12h | 2.24E-05 | 1.53E-05 | 8.23E-06 | 3.03E-06 |
| 24h | 1.46E-06 | 1.28E-06 | 1.94E-06 | 6.91E-07 |
| 36h | 2.54E-06 | 1.92E-06 | 5.60E-06 | 3.60E-06 |
| 48h | 1.85E-06 | 1.14E-06 | 1.33E-06 | 1.61E-06 |
| 72h | 3.45E-07 | 3.41E-07 | 2.68E-07 | 3.76E-07 |
|     | cgd2_820 |          |          |          |
| 2h  | 8.37E-03 | 6.43E-05 | 1.47E-05 | 1.15E-05 |
| 6h  | 5.88E-05 | 3.28E-05 | 4.06E-05 | 3.03E-05 |
| 12h | 3.49E-05 | 1.23E-05 | 3.05E-05 | 8.26E-06 |
| 24h | 1.19E-04 | 2.21E-05 | 5.89E-05 | 1.80E-05 |
| 36h | 1.95E-05 | 1.21E-05 | 2.33E-05 | 1.72E-05 |
| 48h | 3.59E-05 | 1.30E-05 | 1.43E-05 | 1.33E-05 |
| 72h | 8.26E-06 | 3.50E-06 | 5.64E-06 | 2.04E-06 |
|     | cgd2_830 |          |          |          |
| 2h  | 0.00E+00 | 1.39E-07 | 1.31E-08 | 5.69E-08 |
| 6h  | 8.47E-06 | 3.57E-05 | 6.15E-07 | 4.66E-07 |
| 12h | 1.40E-06 | 1.76E-08 | 5.82E-08 | 9.00E-08 |
| 24h | 7.15E-07 | 2.70E-07 | 5.95E-07 | 3.51E-07 |
| 36h | 2.06E-06 | 8.05E-07 | 6.02E-07 | 6.11E-07 |
| 48h | 7.09E-06 | 6.83E-07 | 5.53E-07 | 1.20E-06 |
| 72h | 4.54E-06 | 9.06E-07 | 4.76E-07 | 4.08E-07 |
|     | cgd2_900 |          |          |          |
| 2h  | 1.50E-06 | 2.21E-07 | 9.70E-09 | 1.28E-07 |
| 6h  | 5.65E-06 | 4.48E-06 | 3.35E-06 | 1.99E-06 |
| 12h | 2.70E-08 | 6.73E-08 | 2.47E-07 | 1.14E-07 |
| 24h | 7.41E-07 | 4.02E-07 | 5.98E-07 | 6.54E-07 |
| 36h | 1.20E-06 | 5.86E-07 | 2.96E-07 | 5.09E-07 |
| 48h | 2.12E-06 | 3.97E-07 | 1.52E-07 | 3.68E-07 |
| 72h | 2.05E-06 | 2.95E-07 | 4.06E-07 | 7.35E-07 |

|     |           |          |          |          |
|-----|-----------|----------|----------|----------|
|     | cgd2_910  |          |          |          |
| 2h  | 0.00E+00  | 1.07E-05 | 1.01E-05 | 6.90E-06 |
| 6h  | 1.80E-07  | 6.42E-06 | 2.83E-03 | 1.53E-04 |
| 12h | 8.72E-08  | 3.12E-05 | 6.77E-04 | 9.77E-05 |
| 24h | 4.37E-08  | 3.87E-05 | 2.12E-04 | 5.47E-04 |
| 36h | 3.88E-07  | 1.47E-04 | 1.10E-04 | 1.41E-03 |
| 48h | 6.17E-07  | 6.53E-05 | 1.19E-04 | 7.88E-05 |
| 72h | 8.66E-07  | 1.54E-04 | 4.13E-04 | 6.70E-03 |
|     | cgd2_980  |          |          |          |
| 2h  | 3.02E-06  | 2.40E-06 | 6.76E-07 | 1.67E-06 |
| 6h  | 8.10E-07  | 2.44E-06 | 7.01E-07 | 4.88E-07 |
| 12h | 5.73E-07  | 3.45E-07 | 9.97E-07 | 1.34E-06 |
| 24h | 1.09E-06  | 1.31E-06 | 1.52E-06 | 3.89E-07 |
| 36h | 5.02E-07  | 4.78E-07 | 7.79E-07 | 8.89E-07 |
| 48h | 1.86E-06  | 3.74E-07 | 2.90E-07 | 8.82E-07 |
| 72h | 8.95E-07  | 2.28E-07 | 4.90E-07 | 4.17E-07 |
|     | cgd2_990  |          |          |          |
| 2h  | 4.39E-05  | 1.35E-05 | 1.13E-06 | 9.57E-06 |
| 6h  | 1.23E-05  | 3.47E-05 | 1.44E-05 | 2.14E-05 |
| 12h | 4.47E-06  | 4.01E-06 | 1.01E-05 | 1.56E-05 |
| 24h | 4.02E-06  | 1.11E-05 | 1.13E-05 | 6.75E-06 |
| 36h | 4.39E-06  | 6.52E-06 | 8.88E-06 | 2.51E-05 |
| 48h | 6.74E-06  | 3.40E-06 | 1.60E-06 | 6.53E-06 |
| 72h | 1.39E-06  | 1.76E-06 | 1.09E-06 | 4.38E-06 |
|     | cgd3_1020 |          |          |          |
| 2h  | 1.62E-04  | 9.49E-07 | 4.92E-07 | 5.65E-07 |
| 6h  | 1.91E-07  | 2.20E-07 | 1.87E-07 | 1.95E-07 |
| 12h | 2.44E-07  | 9.91E-08 | 2.85E-07 | 2.24E-07 |
| 24h | 3.40E-07  | 2.18E-07 | 2.21E-07 | 2.87E-07 |
| 36h | 1.89E-07  | 1.36E-07 | 1.44E-07 | 1.90E-07 |
| 48h | 3.86E-07  | 8.28E-08 | 6.92E-08 | 2.39E-07 |
| 72h | 4.89E-08  | 4.74E-08 | 6.86E-08 | 6.63E-08 |
|     | cgd3_1410 |          |          |          |
| 2h  | 4.25E-04  | 2.73E-04 | 4.63E-04 | 2.45E-04 |
| 6h  | 2.78E-03  | 2.10E-03 | 7.33E-04 | 4.84E-04 |
| 12h | 1.96E-03  | 4.01E-04 | 3.26E-04 | 3.98E-04 |
| 24h | 1.01E-03  | 4.29E-04 | 6.16E-04 | 4.18E-04 |
| 36h | 1.19E-03  | 2.60E-04 | 5.84E-04 | 5.44E-04 |
| 48h | 9.14E-04  | 7.03E-04 | 9.24E-04 | 6.48E-04 |
| 72h | 4.98E-04  | 2.34E-04 | 3.93E-04 | 3.16E-04 |
|     | cgd3_150  |          |          |          |
| 2h  | 0.00E+00  | 1.95E-09 | 0.00E+00 | 0.00E+00 |
| 6h  | 1.50E-07  | 2.67E-07 | 6.40E-07 | 4.69E-07 |
| 12h | 3.28E-07  | 5.21E-07 | 1.07E-06 | 3.21E-06 |
| 24h | 8.47E-07  | 1.65E-06 | 4.19E-06 | 1.70E-06 |
| 36h | 1.39E-06  | 1.89E-06 | 2.08E-06 | 2.43E-06 |
| 48h | 5.38E-06  | 1.56E-06 | 1.81E-06 | 1.36E-06 |
| 72h | 2.59E-06  | 2.35E-06 | 2.48E-06 | 2.33E-06 |
|     | cgd3_2260 |          |          |          |
| 2h  | 1.55E-08  | 5.77E-09 | 0.00E+00 | 4.22E-08 |
| 6h  | 5.48E-08  | 1.68E-08 | 7.96E-10 | 1.17E-08 |
| 12h | 2.04E-05  | 9.35E-06 | 9.81E-06 | 2.12E-05 |
| 24h | 3.28E-06  | 1.82E-06 | 1.46E-06 | 1.07E-06 |

|     |           |          |          |          |
|-----|-----------|----------|----------|----------|
| 36h | 4.04E-06  | 2.15E-06 | 5.30E-06 | 1.14E-05 |
| 48h | 1.01E-06  | 4.34E-07 | 8.98E-07 | 6.08E-07 |
| 72h | 2.35E-07  | 3.87E-07 | 2.44E-07 | 3.24E-07 |
|     | cgd3_2420 |          |          |          |
| 2h  | 3.26E-06  | 4.76E-05 | 3.41E-06 | 3.14E-06 |
| 6h  | 1.09E-07  | 0.00E+00 | 0.00E+00 | 1.39E-07 |
| 12h | 0.00E+00  | 0.00E+00 | 0.00E+00 | 5.90E-08 |
| 24h | 1.76E-05  | 9.61E-05 | 1.06E-04 | 3.39E-06 |
| 36h | 2.10E-05  | 1.36E-04 | 1.11E-04 | 5.53E-05 |
| 48h | 2.67E-04  | 7.51E-04 | 2.05E-04 | 1.48E-04 |
| 72h | 1.11E-04  | 6.66E-05 | 2.75E-04 | 3.80E-05 |
|     | cgd3_2830 |          |          |          |
| 2h  | 1.33E-03  | 1.09E-03 | 1.96E-03 | 7.73E-04 |
| 6h  | 3.48E-03  | 2.18E-03 | 9.70E-03 | 1.14E-03 |
| 12h | 1.44E-03  | 4.88E-04 | 2.21E-03 | 1.50E-03 |
| 24h | 1.67E-03  | 2.03E-03 | 3.53E-03 | 1.66E-03 |
| 36h | 9.91E-04  | 1.23E-03 | 1.88E-03 | 1.05E-03 |
| 48h | 6.60E-04  | 7.56E-04 | 8.05E-04 | 4.69E-04 |
| 72h | 1.18E-04  | 2.39E-04 | 2.12E-04 | 5.30E-05 |
|     | cgd3_3220 |          |          |          |
| 2h  | 4.64E-07  | 4.27E-07 | 2.41E-07 | 3.81E-07 |
| 6h  | 1.60E-06  | 9.22E-07 | 1.85E-06 | 1.57E-05 |
| 12h | 5.29E-07  | 9.76E-08 | 4.39E-06 | 1.27E-06 |
| 24h | 2.82E-06  | 2.87E-06 | 1.32E-05 | 1.87E-05 |
| 36h | 1.10E-05  | 1.70E-05 | 2.85E-05 | 1.37E-05 |
| 48h | 7.46E-06  | 3.67E-06 | 1.72E-05 | 6.70E-06 |
| 72h | 1.62E-06  | 2.82E-06 | 5.15E-06 | 2.72E-06 |
|     | cgd3_4300 |          |          |          |
| 2h  | 5.60E-09  | 1.04E-09 | 0.00E+00 | 1.31E-09 |
| 6h  | 2.17E-08  | 6.23E-09 | 2.76E-08 | 2.82E-08 |
| 12h | 8.73E-08  | 1.40E-08 | 8.45E-09 | 8.26E-09 |
| 24h | 2.19E-08  | 1.67E-09 | 3.82E-09 | 9.42E-09 |
| 36h | 7.05E-09  | 8.25E-09 | 9.53E-09 | 7.38E-09 |
| 48h | 3.78E-09  | 5.69E-09 | 1.86E-08 | 1.10E-08 |
| 72h | 4.47E-09  | 1.30E-08 | 8.46E-09 | 3.00E-09 |
|     | cgd3_550  |          |          |          |
| 2h  | 9.46E-05  | 2.79E-05 | 1.18E-05 | 1.13E-05 |
| 6h  | 2.39E-05  | 7.62E-06 | 1.07E-05 | 5.40E-05 |
| 12h | 1.64E-05  | 8.94E-06 | 1.99E-05 | 4.10E-05 |
| 24h | 3.30E-05  | 8.31E-06 | 1.91E-05 | 1.80E-05 |
| 36h | 8.93E-06  | 5.27E-06 | 7.29E-06 | 3.00E-04 |
| 48h | 8.44E-06  | 1.26E-06 | 8.56E-06 | 3.90E-06 |
| 72h | 1.72E-06  | 1.17E-06 | 1.87E-06 | 1.24E-06 |
|     | cgd3_650  |          |          |          |
| 2h  | 1.04E-03  | 4.07E-06 | 8.45E-07 | 1.26E-06 |
| 6h  | 2.49E-06  | 8.46E-07 | 6.64E-07 | 4.00E-06 |
| 12h | 1.48E-06  | 4.41E-07 | 7.46E-07 | 8.69E-07 |
| 24h | 1.26E-06  | 3.41E-07 | 1.34E-06 | 1.25E-06 |
| 36h | 1.14E-06  | 5.65E-07 | 1.14E-06 | 1.27E-06 |
| 48h | 2.26E-06  | 2.73E-07 | 9.47E-07 | 4.14E-07 |
| 72h | 7.80E-07  | 1.09E-07 | 1.55E-07 | 2.81E-08 |
|     | cgd3_690  |          |          |          |
| 2h  | 1.27E-04  | 2.98E-07 | 4.04E-08 | 2.91E-07 |

|     |           |          |          |          |          |
|-----|-----------|----------|----------|----------|----------|
| 6h  |           | 2.23E-06 | 1.58E-06 | 3.25E-06 | 4.51E-06 |
| 12h |           | 7.15E-08 | 1.46E-07 | 3.54E-07 | 8.56E-07 |
| 24h |           | 7.32E-07 | 3.91E-07 | 3.67E-06 | 2.61E-06 |
| 36h |           | 1.52E-06 | 9.53E-07 | 1.06E-06 | 1.71E-06 |
| 48h |           | 1.08E-06 | 4.96E-07 | 1.30E-06 | 6.62E-07 |
| 72h |           | 2.35E-07 | 2.82E-07 | 2.71E-07 | 1.00E-07 |
|     | cgd4_1010 |          |          |          |          |
| 2h  |           | 5.82E-06 | 6.47E-07 | 1.51E-06 | 1.24E-06 |
| 6h  |           | 2.89E-07 | 3.01E-07 | 3.38E-07 | 2.90E-06 |
| 12h |           | 2.58E-06 | 4.07E-06 | 2.22E-06 | 3.62E-06 |
| 24h |           | 1.79E-06 | 1.35E-06 | 1.17E-06 | 1.57E-06 |
| 36h |           | 4.01E-07 | 4.99E-07 | 5.26E-07 | 3.93E-07 |
| 48h |           | 7.90E-07 | 1.46E-07 | 3.27E-07 | 2.59E-07 |
| 72h |           | 1.66E-07 | 1.19E-07 | 4.67E-08 | 3.60E-08 |
|     | cgd4_1020 |          |          |          |          |
| 2h  |           | 7.01E-06 | 9.17E-07 | 4.24E-06 | 3.67E-01 |
| 6h  |           | 8.76E-07 | 4.20E-07 | 2.71E-06 | 1.99E-04 |
| 12h |           | 3.52E-04 | 4.31E-06 | 1.70E-05 | 3.34E-03 |
| 24h |           | 2.85E-06 | 2.10E-06 | 3.06E-06 | 3.99E-03 |
| 36h |           | 4.21E-07 | 4.82E-07 | 8.98E-07 | 4.37E-04 |
| 48h |           | 1.30E-06 | 2.77E-07 | 3.72E-07 | 1.62E-04 |
| 72h |           | 2.64E-07 | 1.12E-07 | 1.96E-07 | 1.02E-04 |
|     | cgd4_1030 |          |          |          |          |
| 2h  |           | 4.41E-06 | 8.80E-07 | 3.56E-06 | 1.76E-06 |
| 6h  |           | 1.33E-05 | 2.70E-06 | 5.93E-06 | 1.47E-05 |
| 12h |           | 1.01E-06 | 4.38E-07 | 3.17E-06 | 5.59E-06 |
| 24h |           | 4.27E-06 | 1.67E-06 | 2.68E-06 | 7.79E-06 |
| 36h |           | 2.36E-06 | 1.86E-06 | 1.58E-06 | 1.14E-06 |
| 48h |           | 4.54E-06 | 5.29E-07 | 1.62E-06 | 1.24E-06 |
| 72h |           | 7.61E-07 | 2.79E-07 | 4.88E-07 | 2.70E-07 |
|     | cgd4_1080 |          |          |          |          |
| 2h  |           | 0.00E+00 | 1.18E-05 | 3.81E-06 | 4.17E-05 |
| 6h  |           | 5.13E-05 | 6.90E-05 | 2.89E-05 | 2.11E-04 |
| 12h |           | 1.54E-06 | 4.59E-06 | 1.72E-05 | 7.72E-05 |
| 24h |           | 6.02E-06 | 3.85E-05 | 5.56E-05 | 4.76E-05 |
| 36h |           | 1.54E-05 | 2.68E-05 | 3.96E-05 | 5.33E-05 |
| 48h |           | 3.21E-06 | 5.83E-05 | 7.98E-05 | 4.38E-05 |
| 72h |           | 2.12E-05 | 6.81E-05 | 2.04E-05 | 1.76E-05 |
|     | cgd4_1090 |          |          |          |          |
| 2h  |           | 1.01E-06 | 2.83E-06 | 1.89E-06 | 1.46E-04 |
| 6h  |           | 1.22E-07 | 0.00E+00 | 4.36E-05 | 2.67E-05 |
| 12h |           | 1.68E-07 | 1.99E-05 | 2.34E-05 | 1.36E-04 |
| 24h |           | 2.52E-07 | 1.94E-04 | 5.87E-05 | 1.16E-04 |
| 36h |           | 5.01E-07 | 3.40E-05 | 1.73E-05 | 4.16E-05 |
| 48h |           | 4.77E-07 | 8.33E-06 | 2.89E-05 | 1.04E-05 |
| 72h |           | 8.66E-07 | 2.68E-05 | 1.38E-04 | 4.51E-05 |
|     | cgd5_3070 |          |          |          |          |
| 2h  |           | 2.14E-09 | 0.00E+00 | 0.00E+00 | 2.42E-09 |
| 6h  |           | 9.56E-10 | 6.58E-09 | 0.00E+00 | 6.81E-08 |
| 12h |           | 0.00E+00 | 0.00E+00 | 0.00E+00 | 3.16E-08 |
| 24h |           | 3.07E-09 | 2.40E-09 | 6.42E-09 | 3.27E-09 |
| 36h |           | 5.35E-08 | 5.06E-09 | 2.53E-08 | 1.13E-08 |
| 48h |           | 7.31E-06 | 2.16E-06 | 4.41E-06 | 3.02E-06 |

|     |           |          |          |          |
|-----|-----------|----------|----------|----------|
| 72h | 2.11E-06  | 1.67E-06 | 1.15E-06 | 5.71E-06 |
|     | cgd5_3160 |          |          |          |
| 2h  | 6.41E-06  | 2.37E-07 | 1.08E-08 | 1.09E-07 |
| 6h  | 2.51E-08  | 1.41E-08 | 7.03E-09 | 2.20E-09 |
| 12h | 2.28E-03  | 2.80E-03 | 1.02E-03 | 6.51E-04 |
| 24h | 4.92E-04  | 5.72E-04 | 6.02E-05 | 4.77E-05 |
| 36h | 7.46E-05  | 1.02E-04 | 1.51E-04 | 2.42E-04 |
| 48h | 1.30E-04  | 9.10E-05 | 2.93E-05 | 6.60E-05 |
| 72h | 1.13E-05  | 1.91E-05 | 6.58E-06 | 7.17E-06 |
|     | cgd5_3170 |          |          |          |
| 2h  | 2.08E-05  | 5.16E-06 | 0.00E+00 | 3.23E-07 |
| 6h  | 1.67E-05  | 2.29E-04 | 6.47E-05 | 6.44E-07 |
| 12h | 1.20E-02  | 9.69E-03 | 6.03E-03 | 1.22E-03 |
| 24h | 8.33E-03  | 1.25E-03 | 2.59E-03 | 4.40E-04 |
| 36h | 1.33E-02  | 2.66E-03 | 4.81E-03 | 1.57E-03 |
| 48h | 1.68E-02  | 6.10E-03 | 8.68E-03 | 4.93E-03 |
| 72h | 1.14E-02  | 6.48E-03 | 6.30E-03 | 2.79E-03 |
|     | cgd5_3210 |          |          |          |
| 2h  | 2.16E-04  | 0.00E+00 | 0.00E+00 | 0.00E+00 |
| 6h  | 0.00E+00  | 0.00E+00 | 0.00E+00 | 0.00E+00 |
| 12h | 4.66E-04  | 2.43E-04 | 1.49E-04 | 3.37E-05 |
| 24h | 1.19E-04  | 1.08E-04 | 9.94E-05 | 1.99E-05 |
| 36h | 9.46E-05  | 1.59E-04 | 4.24E-04 | 7.98E-05 |
| 48h | 1.42E-04  | 7.88E-05 | 3.66E-04 | 4.70E-05 |
| 72h | 2.85E-04  | 3.74E-05 | 1.34E-04 | 9.56E-05 |
|     | cgd5_3220 |          |          |          |
| 2h  | 0.00E+00  | 0.00E+00 | 0.00E+00 | 0.00E+00 |
| 6h  | 2.50E-06  | 2.86E-06 | 2.95E-06 | 1.26E-06 |
| 12h | 1.52E-07  | 5.79E-07 | 8.45E-07 | 1.59E-07 |
| 24h | 5.27E-07  | 7.83E-07 | 1.15E-06 | 5.28E-07 |
| 36h | 1.00E-06  | 1.53E-06 | 1.65E-06 | 1.56E-06 |
| 48h | 2.21E-06  | 1.52E-06 | 1.50E-06 | 1.19E-06 |
| 72h | 2.90E-07  | 3.35E-07 | 3.92E-07 | 5.33E-07 |
|     | cgd5_3270 |          |          |          |
| 2h  | 6.08E-09  | 0.00E+00 | 0.00E+00 | 5.75E-10 |
| 6h  | 0.00E+00  | 4.95E-09 | 7.37E-10 | 0.00E+00 |
| 12h | 1.74E-07  | 5.41E-07 | 1.17E-07 | 2.71E-08 |
| 24h | 1.60E-07  | 7.27E-08 | 1.83E-08 | 9.53E-09 |
| 36h | 2.48E-07  | 3.71E-07 | 1.81E-07 | 1.35E-07 |
| 48h | 6.21E-07  | 2.80E-07 | 2.38E-07 | 1.90E-07 |
| 72h | 6.12E-07  | 3.75E-07 | 3.65E-07 | 3.34E-07 |
|     | cgd5_3280 |          |          |          |
| 2h  | 4.33E-05  | 1.84E-05 | 7.78E-05 | 5.13E-04 |
| 6h  | 2.31E-05  | 2.79E-05 | 2.24E-04 | 5.37E-03 |
| 12h | 2.11E-06  | 5.20E-06 | 1.83E-05 | 1.86E-03 |
| 24h | 1.10E-05  | 6.41E-06 | 3.98E-04 | 1.89E-03 |
| 36h | 2.86E-05  | 4.68E-06 | 7.08E-05 | 3.03E-03 |
| 48h | 1.14E-05  | 5.66E-06 | 1.06E-04 | 2.90E-03 |
| 72h | 1.86E-05  | 3.50E-06 | 2.83E-04 | 1.91E-03 |
|     | cgd5_3290 |          |          |          |
| 2h  | 6.44E-08  | 4.72E-08 | 2.43E-08 | 3.45E-08 |
| 6h  | 2.32E-09  | 2.79E-09 | 3.84E-09 | 7.61E-09 |
| 12h | 4.65E-09  | 1.72E-08 | 8.52E-09 | 6.90E-10 |

|           |          |          |          |          |
|-----------|----------|----------|----------|----------|
| 24h       | 8.97E-09 | 6.84E-09 | 2.12E-08 | 3.99E-09 |
| 36h       | 2.20E-08 | 8.85E-09 | 9.54E-09 | 6.08E-09 |
| 48h       | 2.82E-08 | 1.76E-08 | 2.65E-08 | 2.14E-08 |
| 72h       | 3.13E-08 | 3.72E-08 | 2.03E-08 | 2.04E-08 |
| cgd5_3340 |          |          |          |          |
| 2h        | 2.52E-05 | 4.82E-05 | 1.15E-05 | 1.47E-05 |
| 6h        | 1.13E-05 | 3.11E-05 | 1.83E-05 | 7.74E-06 |
| 12h       | 5.62E-06 | 3.24E-05 | 1.97E-05 | 5.71E-06 |
| 24h       | 1.85E-05 | 2.52E-05 | 2.03E-05 | 8.95E-06 |
| 36h       | 1.69E-05 | 1.68E-05 | 8.47E-06 | 6.05E-06 |
| 48h       | 1.00E-05 | 6.71E-06 | 1.42E-05 | 6.72E-06 |
| 72h       | 6.38E-06 | 4.29E-06 | 3.07E-06 | 3.53E-06 |
| cgd5_3350 |          |          |          |          |
| 2h        | 1.51E-06 | 1.30E-06 | 2.18E-06 | 1.79E-06 |
| 6h        | 3.45E-07 | 4.96E-07 | 1.26E-06 | 4.85E-07 |
| 12h       | 6.44E-07 | 7.70E-07 | 1.58E-06 | 7.34E-07 |
| 24h       | 5.91E-07 | 8.40E-07 | 1.13E-06 | 1.03E-06 |
| 36h       | 7.25E-07 | 5.00E-07 | 1.36E-06 | 8.69E-07 |
| 48h       | 7.30E-07 | 3.14E-06 | 1.06E-06 | 8.47E-07 |
| 72h       | 6.91E-07 | 2.82E-07 | 3.79E-07 | 7.36E-07 |
| cgd5_3380 |          |          |          |          |
| 2h        | 0.00E+00 | 0.00E+00 | 0.00E+00 | 0.00E+00 |
| 6h        | 3.17E-07 | 1.15E-06 | 1.98E-06 | 1.25E-06 |
| 12h       | 7.74E-08 | 1.83E-07 | 2.59E-07 | 2.19E-07 |
| 24h       | 1.12E-07 | 3.60E-07 | 1.44E-06 | 1.58E-06 |
| 36h       | 1.83E-06 | 3.54E-06 | 1.50E-06 | 1.82E-06 |
| 48h       | 1.18E-06 | 9.47E-07 | 9.68E-07 | 1.47E-06 |
| 72h       | 3.93E-07 | 5.14E-07 | 2.28E-07 | 8.81E-07 |
| cgd5_3420 |          |          |          |          |
| 2h        | 2.85E-09 | 1.89E-09 | 0.00E+00 | 0.00E+00 |
| 6h        | 6.18E-10 | 5.96E-10 | 1.07E-09 | 0.00E+00 |
| 12h       | 8.26E-11 | 8.39E-10 | 6.39E-09 | 2.01E-10 |
| 24h       | 1.52E-09 | 9.53E-10 | 1.02E-09 | 7.23E-09 |
| 36h       | 6.24E-09 | 1.66E-08 | 7.59E-09 | 1.55E-08 |
| 48h       | 3.52E-07 | 1.23E-07 | 7.95E-08 | 2.80E-07 |
| 72h       | 1.45E-07 | 2.47E-07 | 8.82E-08 | 4.34E-08 |
| cgd5_3430 |          |          |          |          |
| 2h        | 9.16E-06 | 1.48E-06 | 1.09E-06 | 2.33E-05 |
| 6h        | 2.98E-05 | 2.98E-06 | 2.24E-05 | 1.53E-04 |
| 12h       | 3.65E-07 | 8.25E-08 | 1.93E-06 | 2.81E-06 |
| 24h       | 4.40E-06 | 3.06E-06 | 2.42E-05 | 8.12E-05 |
| 36h       | 4.44E-06 | 2.97E-06 | 4.94E-06 | 1.92E-05 |
| 48h       | 7.97E-06 | 1.58E-06 | 3.95E-06 | 1.99E-05 |
| 72h       | 2.61E-06 | 1.66E-06 | 8.71E-07 | 1.13E-05 |
| cgd5_3450 |          |          |          |          |
| 2h        | 1.48E-06 | 3.53E-07 | 1.10E-07 | 3.06E-05 |
| 6h        | 5.09E-06 | 2.73E-06 | 3.07E-05 | 6.24E-06 |
| 12h       | 1.64E-07 | 2.17E-07 | 8.08E-07 | 7.95E-07 |
| 24h       | 8.02E-07 | 9.74E-07 | 2.71E-06 | 4.37E-06 |
| 36h       | 1.20E-06 | 7.41E-07 | 3.08E-06 | 7.87E-07 |
| 48h       | 6.01E-07 | 2.58E-07 | 2.68E-07 | 4.24E-07 |
| 72h       | 4.89E-08 | 1.90E-07 | 2.15E-08 | 1.08E-07 |
| cgd5_3460 |          |          |          |          |

|     |           |          |          |          |
|-----|-----------|----------|----------|----------|
| 2h  | 1.66E-07  | 6.86E-08 | 1.29E-08 | 3.18E-07 |
| 6h  | 1.66E-07  | 1.60E-07 | 5.59E-07 | 6.27E-07 |
| 12h | 6.66E-07  | 1.78E-06 | 1.31E-06 | 4.63E-07 |
| 24h | 3.37E-07  | 4.28E-07 | 7.67E-07 | 9.00E-07 |
| 36h | 1.22E-06  | 2.26E-06 | 3.62E-06 | 3.23E-06 |
| 48h | 1.33E-06  | 2.28E-07 | 7.77E-07 | 1.16E-06 |
| 72h | 2.26E-07  | 3.67E-07 | 1.13E-07 | 2.30E-07 |
|     | cgd5_3490 |          |          |          |
| 2h  | 1.13E-04  | 2.41E-03 | 1.09E-05 | 7.19E-06 |
| 6h  | 7.19E-05  | 9.86E-03 | 3.66E-03 | 4.30E-05 |
| 12h | 2.25E-05  | 1.48E-03 | 5.63E-04 | 1.04E-05 |
| 24h | 9.62E-05  | 7.76E-03 | 1.40E-04 | 8.14E-05 |
| 36h | 2.19E-05  | 8.74E-04 | 7.59E-04 | 4.51E-05 |
| 48h | 9.55E-05  | 2.44E-03 | 1.85E-03 | 1.85E-05 |
| 72h | 1.71E-04  | 5.22E-04 | 2.19E-04 | 3.33E-06 |
|     | cgd5_350  |          |          |          |
| 2h  | 2.61E-03  | 3.39E-05 | 2.50E-04 | 2.04E-04 |
| 6h  | 1.84E-03  | 3.52E-05 | 3.07E-03 | 1.83E-04 |
| 12h | 1.19E-04  | 1.34E-06 | 1.53E-04 | 5.87E-05 |
| 24h | 2.65E-04  | 1.63E-05 | 5.88E-04 | 6.88E-05 |
| 36h | 2.59E-04  | 2.24E-05 | 5.43E-04 | 8.13E-05 |
| 48h | 8.86E-04  | 1.70E-05 | 3.22E-04 | 6.50E-05 |
| 72h | 3.00E-04  | 6.99E-06 | 1.12E-04 | 3.66E-04 |
|     | cgd5_3530 |          |          |          |
| 2h  | 3.52E-06  | 1.39E-07 | 8.00E-09 | 3.67E-07 |
| 6h  | 9.63E-06  | 3.68E-06 | 1.47E-05 | 6.30E-05 |
| 12h | 7.46E-06  | 3.92E-07 | 3.67E-06 | 7.83E-06 |
| 24h | 2.44E-06  | 1.32E-06 | 1.86E-05 | 1.85E-05 |
| 36h | 6.30E-06  | 1.54E-06 | 6.00E-06 | 2.21E-05 |
| 48h | 1.38E-05  | 9.84E-07 | 1.21E-05 | 1.07E-05 |
| 72h | 9.82E-07  | 2.33E-07 | 2.84E-07 | 1.78E-06 |
|     | cgd5_3600 |          |          |          |
| 2h  | 0.00E+00  | 0.00E+00 | 0.00E+00 | 0.00E+00 |
| 6h  | 0.00E+00  | 0.00E+00 | 0.00E+00 | 0.00E+00 |
| 12h | 2.37E-07  | 1.27E-07 | 0.00E+00 | 5.77E-08 |
| 24h | 2.40E-08  | 2.62E-08 | 5.70E-09 | 1.19E-08 |
| 36h | 2.24E-08  | 1.09E-08 | 1.61E-07 | 1.05E-07 |
| 48h | 9.17E-09  | 4.91E-09 | 2.28E-08 | 1.03E-08 |
| 72h | 7.25E-09  | 3.42E-08 | 0.00E+00 | 9.85E-09 |
|     | cgd5_3680 |          |          |          |
| 2h  | 8.86E-07  | 2.07E-07 | 0.00E+00 | 5.63E-05 |
| 6h  | 2.39E-07  | 1.91E-07 | 3.87E-07 | 3.60E-06 |
| 12h | 1.46E-09  | 9.17E-10 | 1.62E-07 | 6.60E-08 |
| 24h | 8.83E-08  | 1.37E-07 | 1.30E-06 | 4.26E-07 |
| 36h | 2.03E-07  | 1.13E-07 | 7.11E-08 | 3.20E-07 |
| 48h | 1.98E-07  | 5.92E-08 | 1.02E-07 | 5.05E-07 |
| 72h | 6.90E-08  | 8.94E-08 | 4.08E-08 | 4.88E-08 |
|     | cgd5_3690 |          |          |          |
| 2h  | 1.42E-04  | 9.80E-06 | 2.13E-05 | 1.60E-04 |
| 6h  | 3.67E-05  | 7.86E-06 | 2.48E-05 | 1.86E-04 |
| 12h | 6.79E-05  | 1.78E-05 | 1.14E-04 | 4.65E-04 |
| 24h | 4.61E-05  | 2.78E-05 | 3.41E-05 | 1.02E-04 |
| 36h | 4.10E-05  | 7.50E-06 | 4.38E-05 | 2.05E-04 |



|     |           |          |          |          |
|-----|-----------|----------|----------|----------|
| 48h | 6.15E-05  | 7.81E-06 | 1.61E-05 | 1.16E-04 |
| 72h | 3.68E-06  | 2.38E-06 | 8.44E-07 | 4.68E-05 |
|     | cgd5_3770 |          |          |          |
| 2h  | 1.24E-06  | 6.29E-07 | 7.81E-07 | 5.88E-07 |
| 6h  | 6.40E-08  | 1.02E-07 | 2.57E-08 | 4.25E-08 |
| 12h | 1.61E-07  | 3.36E-07 | 3.46E-07 | 2.50E-07 |
| 24h | 1.89E-07  | 2.33E-07 | 2.16E-07 | 1.31E-07 |
| 36h | 7.54E-08  | 1.50E-07 | 2.64E-07 | 2.25E-07 |
| 48h | 2.16E-07  | 4.31E-08 | 1.74E-07 | 1.16E-07 |
| 72h | 5.23E-08  | 1.48E-07 | 7.15E-08 | 7.03E-08 |
|     | cgd5_390  |          |          |          |
| 2h  | 7.18E-05  | 2.44E-03 | 2.87E-03 | 4.56E-03 |
| 6h  | 1.45E-04  | 1.04E-03 | 5.96E-03 | 1.63E-02 |
| 12h | 3.26E-05  | 6.08E-04 | 3.27E-03 | 2.33E-03 |
| 24h | 1.88E-04  | 1.13E-03 | 1.33E-02 | 4.02E-03 |
| 36h | 2.21E-04  | 8.78E-04 | 8.24E-03 | 3.52E-03 |
| 48h | 1.57E-04  | 5.21E-04 | 3.09E-03 | 2.57E-03 |
| 72h | 6.93E-05  | 1.98E-04 | 6.16E-04 | 6.20E-04 |
|     | cgd5_400  |          |          |          |
| 2h  | 5.55E-06  | 0.00E+00 | 0.00E+00 | 0.00E+00 |
| 6h  | 1.41E-04  | 2.61E-04 | 1.92E-06 | 9.04E-06 |
| 12h | 7.80E-06  | 3.34E-06 | 2.72E-08 | 4.72E-08 |
| 24h | 5.91E-06  | 4.32E-05 | 2.23E-05 | 1.40E-05 |
| 36h | 1.41E-05  | 1.64E-04 | 2.39E-06 | 1.22E-05 |
| 48h | 5.74E-05  | 7.56E-05 | 3.27E-05 | 1.33E-05 |
| 72h | 7.43E-05  | 1.83E-04 | 7.76E-06 | 1.10E-05 |
|     | cgd5_4090 |          |          |          |
| 2h  | 2.09E-05  | 1.30E-05 | 1.27E-06 | 5.56E-06 |
| 6h  | 1.88E-06  | 1.19E-06 | 9.31E-08 | 3.74E-07 |
| 12h | 1.00E-05  | 4.88E-06 | 4.18E-06 | 4.83E-06 |
| 24h | 1.04E-05  | 1.13E-05 | 2.39E-06 | 1.14E-06 |
| 36h | 4.95E-06  | 3.53E-06 | 2.45E-06 | 4.41E-06 |
| 48h | 7.68E-06  | 2.40E-06 | 6.54E-07 | 1.57E-06 |
| 72h | 1.99E-06  | 1.44E-06 | 9.39E-07 | 1.18E-06 |
|     | cgd5_4520 |          |          |          |
| 2h  | 1.48E-05  | 5.77E-06 | 1.32E-06 | 1.78E-06 |
| 6h  | 6.12E-06  | 5.44E-06 | 1.36E-06 | 4.12E-06 |
| 12h | 1.53E-06  | 8.47E-07 | 9.43E-07 | 9.11E-07 |
| 24h | 1.58E-06  | 1.33E-06 | 3.20E-06 | 1.22E-06 |
| 36h | 4.44E-06  | 2.50E-06 | 2.76E-06 | 1.50E-06 |
| 48h | 6.56E-06  | 1.77E-06 | 1.43E-06 | 1.46E-06 |
| 72h | 4.14E-06  | 1.11E-06 | 1.29E-06 | 9.77E-07 |
|     | cgd5_630  |          |          |          |
| 2h  | 1.54E-04  | 9.23E-04 | 7.78E-06 | 1.92E-05 |
| 6h  | 1.18E-04  | 2.48E-04 | 8.53E-05 | 1.89E-04 |
| 12h | 2.24E-04  | 2.54E-04 | 2.36E-05 | 2.94E-05 |
| 24h | 4.38E-05  | 3.45E-04 | 7.07E-05 | 3.44E-05 |
| 36h | 4.52E-05  | 3.28E-04 | 8.28E-05 | 4.20E-05 |
| 48h | 3.46E-03  | 2.27E-04 | 8.84E-05 | 6.94E-05 |
| 72h | 1.64E-04  | 4.25E-04 | 3.13E-05 | 1.06E-05 |
|     | cgd5_90   |          |          |          |
| 2h  | 1.52E-04  | 2.24E-04 | 3.34E-03 | 2.71E-03 |
| 6h  | 2.11E-04  | 2.49E-04 | 4.70E-04 | 5.12E-03 |

|     |           |          |          |          |
|-----|-----------|----------|----------|----------|
| 12h | 8.43E-05  | 7.71E-05 | 2.45E-03 | 1.34E-03 |
| 24h | 4.88E-05  | 2.69E-04 | 8.17E-04 | 1.46E-03 |
| 36h | 1.72E-05  | 2.06E-04 | 2.88E-03 | 1.48E-03 |
| 48h | 4.41E-05  | 7.94E-05 | 3.76E-04 | 9.82E-04 |
| 72h | 1.57E-05  | 4.33E-05 | 2.95E-05 | 3.00E-04 |
|     | cgd5_920  |          |          |          |
| 2h  | 2.08E-05  | 4.09E-06 | 3.93E-07 | 5.73E-07 |
| 6h  | 1.95E-05  | 2.72E-06 | 1.30E-06 | 3.86E-06 |
| 12h | 2.53E-06  | 8.18E-07 | 3.16E-07 | 5.59E-07 |
| 24h | 1.18E-06  | 1.06E-06 | 3.05E-06 | 1.18E-05 |
| 36h | 2.00E-05  | 1.53E-06 | 1.86E-06 | 1.33E-06 |
| 48h | 3.60E-06  | 1.72E-06 | 2.58E-06 | 2.16E-06 |
| 72h | 4.27E-06  | 1.06E-06 | 2.10E-07 | 5.79E-07 |
|     | cgd6_1000 |          |          |          |
| 2h  | 0.00E+00  | 0.00E+00 | 0.00E+00 | 2.54E-08 |
| 6h  | 0.00E+00  | 0.00E+00 | 0.00E+00 | 3.76E-08 |
| 12h | 2.63E-05  | 4.37E-06 | 1.66E-06 | 2.47E-06 |
| 24h | 2.13E-05  | 2.08E-06 | 2.18E-07 | 1.76E-07 |
| 36h | 5.17E-06  | 3.10E-06 | 5.24E-06 | 4.94E-06 |
| 48h | 1.13E-05  | 1.83E-06 | 2.90E-06 | 9.45E-07 |
| 72h | 3.20E-06  | 1.19E-06 | 9.74E-07 | 1.19E-07 |
|     | cgd6_1040 |          |          |          |
| 2h  | 3.80E-06  | 3.35E-07 | 6.63E-07 | 3.57E-07 |
| 6h  | 3.97E-07  | 5.25E-06 | 1.36E-05 | 1.23E-06 |
| 12h | 2.09E-05  | 1.75E-06 | 1.73E-05 | 2.33E-06 |
| 24h | 2.79E-05  | 4.26E-06 | 4.19E-05 | 2.65E-06 |
| 36h | 2.66E-05  | 6.43E-06 | 4.79E-05 | 4.20E-06 |
| 48h | 6.86E-05  | 1.17E-05 | 4.13E-05 | 1.36E-05 |
| 72h | 2.13E-05  | 8.41E-06 | 5.93E-05 | 4.83E-06 |
|     | cgd6_1050 |          |          |          |
| 2h  | 1.09E-03  | 5.90E-05 | 4.48E-04 | 1.42E-05 |
| 6h  | 5.12E-04  | 3.65E-05 | 1.13E-04 | 1.93E-05 |
| 12h | 3.29E-04  | 6.32E-05 | 1.79E-04 | 1.17E-05 |
| 24h | 5.83E-04  | 2.10E-05 | 1.49E-04 | 2.51E-05 |
| 36h | 1.28E-04  | 9.17E-06 | 9.99E-05 | 6.34E-06 |
| 48h | 8.97E-05  | 1.73E-05 | 8.96E-05 | 1.96E-05 |
| 72h | 1.17E-04  | 1.27E-05 | 1.73E-04 | 9.13E-06 |
|     | cgd6_1150 |          |          |          |
| 2h  | 2.43E-08  | 0.00E+00 | 0.00E+00 | 1.07E-08 |
| 6h  | 6.51E-07  | 2.93E-07 | 2.74E-07 | 1.97E-07 |
| 12h | 1.44E-07  | 4.55E-07 | 3.69E-07 | 5.39E-08 |
| 24h | 1.58E-07  | 1.32E-07 | 2.87E-07 | 1.96E-07 |
| 36h | 3.53E-07  | 3.07E-07 | 1.17E-06 | 2.44E-07 |
| 48h | 4.41E-07  | 2.00E-07 | 4.23E-07 | 3.20E-07 |
| 72h | 2.51E-07  | 2.05E-07 | 7.61E-07 | 3.04E-07 |
|     | cgd6_1190 |          |          |          |
| 2h  | 0.00E+00  | 2.04E-09 | 0.00E+00 | 0.00E+00 |
| 6h  | 2.06E-06  | 4.78E-07 | 1.46E-06 | 5.78E-07 |
| 12h | 6.52E-08  | 4.18E-08 | 2.99E-07 | 2.34E-08 |
| 24h | 1.65E-07  | 1.84E-07 | 3.27E-06 | 7.25E-07 |
| 36h | 1.64E-06  | 7.47E-07 | 2.01E-06 | 1.02E-06 |
| 48h | 9.85E-07  | 3.33E-07 | 8.72E-07 | 4.56E-07 |
| 72h | 5.90E-07  | 2.36E-07 | 3.31E-07 | 2.47E-07 |

|     |           |          |          |          |
|-----|-----------|----------|----------|----------|
|     | cgd6_1210 |          |          |          |
| 2h  | 1.11E-04  | 9.09E-06 | 8.12E-05 | 7.79E-06 |
| 6h  | 1.41E-05  | 2.32E-06 | 1.12E-05 | 1.02E-06 |
| 12h | 2.33E-05  | 6.05E-07 | 4.34E-05 | 8.37E-07 |
| 24h | 1.83E-05  | 4.98E-06 | 2.44E-05 | 2.26E-06 |
| 36h | 2.77E-05  | 3.41E-06 | 1.87E-05 | 8.90E-07 |
| 48h | 2.94E-05  | 2.16E-06 | 4.15E-05 | 6.42E-06 |
| 72h | 3.50E-05  | 5.50E-06 | 6.64E-05 | 4.46E-06 |
|     | cgd6_1220 |          |          |          |
| 2h  | 1.73E-04  | 3.95E-06 | 9.84E-06 | 4.51E-06 |
| 6h  | 0.00E+00  | 1.01E-08 | 0.00E+00 | 0.00E+00 |
| 12h | 4.86E-06  | 0.00E+00 | 1.06E-05 | 1.43E-07 |
| 24h | 8.45E-06  | 1.23E-06 | 3.01E-06 | 6.89E-09 |
| 36h | 3.49E-06  | 2.86E-07 | 2.30E-05 | 1.48E-06 |
| 48h | 5.39E-04  | 1.24E-04 | 6.30E-04 | 1.73E-04 |
| 72h | 1.64E-04  | 1.97E-04 | 8.35E-04 | 9.11E-05 |
|     | cgd6_1240 |          |          |          |
| 2h  | 0.00E+00  | 0.00E+00 | 0.00E+00 | 0.00E+00 |
| 6h  | 0.00E+00  | 0.00E+00 | 0.00E+00 | 0.00E+00 |
| 12h | 2.90E-08  | 1.93E-08 | 3.23E-08 | 6.81E-09 |
| 24h | 5.38E-09  | 2.53E-09 | 2.88E-08 | 2.06E-09 |
| 36h | 2.85E-08  | 4.06E-08 | 5.07E-08 | 7.07E-08 |
| 48h | 4.88E-08  | 2.34E-08 | 7.86E-08 | 4.53E-08 |
| 72h | 3.21E-08  | 8.01E-08 | 3.21E-08 | 3.67E-08 |
|     | cgd6_1250 |          |          |          |
| 2h  | 2.63E-07  | 1.89E-07 | 1.29E-08 | 9.50E-08 |
| 6h  | 3.44E-07  | 4.53E-07 | 1.42E-06 | 2.22E-07 |
| 12h | 3.85E-07  | 1.33E-08 | 1.23E-07 | 1.79E-02 |
| 24h | 6.22E-08  | 5.74E-08 | 8.21E-07 | 1.14E-07 |
| 36h | 2.45E-07  | 2.26E-07 | 6.56E-07 | 9.41E-08 |
| 48h | 4.05E-07  | 1.08E-07 | 3.69E-07 | 2.42E-07 |
| 72h | 4.59E-08  | 1.64E-07 | 1.15E-07 | 5.66E-08 |
|     | cgd6_1260 |          |          |          |
| 2h  | 2.30E-07  | 1.05E-07 | 1.87E-06 | 3.08E-08 |
| 6h  | 4.03E-08  | 2.58E-07 | 3.68E-07 | 2.45E-07 |
| 12h | 9.91E-08  | 6.78E-10 | 5.16E-07 | 5.66E-09 |
| 24h | 1.57E-07  | 7.05E-08 | 3.09E-06 | 9.36E-08 |
| 36h | 5.94E-07  | 1.72E-07 | 5.43E-07 | 1.63E-07 |
| 48h | 2.51E-06  | 2.10E-07 | 9.42E-07 | 1.99E-07 |
| 72h | 5.75E-07  | 2.35E-07 | 2.54E-08 | 3.77E-08 |
|     | cgd6_1360 |          |          |          |
| 2h  | 0.00E+00  | 2.24E-06 | 0.00E+00 | 0.00E+00 |
| 6h  | 0.00E+00  | 1.74E-07 | 3.04E-05 | 1.34E-07 |
| 12h | 2.63E-03  | 4.08E-03 | 2.43E-03 | 1.03E-03 |
| 24h | 3.70E-04  | 5.72E-04 | 4.44E-04 | 3.34E-04 |
| 36h | 9.08E-04  | 5.12E-04 | 1.52E-03 | 6.14E-04 |
| 48h | 1.36E-03  | 2.55E-03 | 4.24E-03 | 2.59E-03 |
| 72h | 4.73E-04  | 3.00E-04 | 8.19E-04 | 1.67E-04 |
|     | cgd6_1540 |          |          |          |
| 2h  | 8.57E-06  | 5.20E-07 | 0.00E+00 | 1.31E-08 |
| 6h  | 9.44E-06  | 2.42E-06 | 2.63E-06 | 1.75E-07 |
| 12h | 3.72E-05  | 9.33E-06 | 3.25E-05 | 5.79E-06 |
| 24h | 2.45E-05  | 7.04E-06 | 6.59E-05 | 8.24E-06 |

|     |           |          |          |          |
|-----|-----------|----------|----------|----------|
| 36h | 1.18E-04  | 2.95E-05 | 1.08E-04 | 2.69E-05 |
| 48h | 1.01E-04  | 1.77E-05 | 1.01E-04 | 4.70E-05 |
| 72h | 2.93E-05  | 6.22E-06 | 3.14E-05 | 4.03E-06 |
|     | cgd6_1650 |          |          |          |
| 2h  | 7.05E-06  | 2.92E-04 | 4.81E-05 | 3.31E-04 |
| 6h  | 1.05E-04  | 2.95E-04 | 3.61E-04 | 3.56E-04 |
| 12h | 3.11E-05  | 2.09E-04 | 5.07E-04 | 1.15E-04 |
| 24h | 1.38E-05  | 2.99E-04 | 9.07E-05 | 7.36E-04 |
| 36h | 5.85E-05  | 2.96E-04 | 4.46E-05 | 1.70E-03 |
| 48h | 4.68E-05  | 9.44E-05 | 5.15E-05 | 1.35E-04 |
| 72h | 8.53E-06  | 2.76E-04 | 8.15E-05 | 5.88E-05 |
|     | cgd6_1660 |          |          |          |
| 2h  | 0.00E+00  | 8.60E-08 | 0.00E+00 | 0.00E+00 |
| 6h  | 0.00E+00  | 0.00E+00 | 4.42E-06 | 3.65E-09 |
| 12h | 2.90E-05  | 4.10E-05 | 5.80E-04 | 1.06E-04 |
| 24h | 1.04E-05  | 6.95E-06 | 8.12E-05 | 8.01E-06 |
| 36h | 7.49E-06  | 2.29E-05 | 2.77E-04 | 1.60E-05 |
| 48h | 3.51E-06  | 4.84E-06 | 3.97E-05 | 2.40E-06 |
| 72h | 1.14E-06  | 2.89E-06 | 3.92E-05 | 1.07E-06 |
|     | cgd6_1690 |          |          |          |
| 2h  | 1.08E-07  | 2.08E-08 | 0.00E+00 | 4.29E-10 |
| 6h  | 0.00E+00  | 7.12E-09 | 1.94E-06 | 4.25E-08 |
| 12h | 3.05E-06  | 3.74E-06 | 7.10E-05 | 5.08E-06 |
| 24h | 2.19E-06  | 2.38E-06 | 3.41E-05 | 1.68E-06 |
| 36h | 1.40E-06  | 1.89E-06 | 4.12E-05 | 2.37E-06 |
| 48h | 6.28E-07  | 9.75E-07 | 7.41E-06 | 8.57E-07 |
| 72h | 2.63E-07  | 7.50E-07 | 1.69E-05 | 4.40E-08 |
|     | cgd6_170  |          |          |          |
| 2h  | 8.32E-09  | 0.00E+00 | 0.00E+00 | 0.00E+00 |
| 6h  | 0.00E+00  | 0.00E+00 | 0.00E+00 | 4.73E-09 |
| 12h | 0.00E+00  | 0.00E+00 | 0.00E+00 | 0.00E+00 |
| 24h | 5.40E-09  | 9.32E-10 | 2.36E-09 | 7.79E-09 |
| 36h | 5.80E-09  | 1.04E-08 | 1.34E-08 | 9.34E-09 |
| 48h | 3.85E-08  | 4.13E-08 | 6.82E-08 | 1.78E-08 |
| 72h | 1.63E-08  | 3.20E-08 | 6.42E-08 | 2.66E-08 |
|     | cgd6_1800 |          |          |          |
| 2h  | 1.73E-06  | 4.78E-07 | 3.06E-06 | 1.37E-07 |
| 6h  | 1.96E-06  | 2.13E-06 | 5.50E-06 | 1.10E-06 |
| 12h | 2.32E-07  | 2.93E-08 | 1.33E-05 | 6.00E-07 |
| 24h | 1.84E-06  | 1.17E-06 | 3.73E-05 | 3.20E-06 |
| 36h | 2.62E-06  | 2.37E-06 | 1.05E-05 | 1.46E-06 |
| 48h | 5.81E-07  | 9.16E-07 | 4.51E-06 | 4.64E-07 |
| 72h | 5.54E-08  | 9.47E-07 | 8.75E-06 | 2.02E-07 |
|     | cgd6_1880 |          |          |          |
| 2h  | 1.68E-06  | 9.64E-07 | 1.25E-06 | 3.49E-07 |
| 6h  | 3.59E-08  | 3.32E-07 | 8.96E-07 | 4.86E-08 |
| 12h | 4.43E-08  | 1.05E-07 | 1.05E-06 | 4.05E-07 |
| 24h | 4.91E-07  | 5.60E-07 | 5.65E-07 | 2.22E-07 |
| 36h | 2.76E-07  | 5.29E-07 | 2.98E-07 | 5.50E-07 |
| 48h | 8.31E-08  | 2.40E-07 | 3.83E-07 | 7.29E-08 |
| 72h | 2.24E-07  | 1.59E-07 | 3.21E-07 | 2.65E-07 |
|     | cgd6_1890 |          |          |          |
| 2h  | 7.53E-05  | 5.05E-05 | 3.25E-04 | 2.29E-05 |

|           |          |          |          |          |
|-----------|----------|----------|----------|----------|
| 6h        | 5.81E-06 | 3.81E-05 | 5.85E-04 | 1.20E-05 |
| 12h       | 1.18E-05 | 1.69E-05 | 7.25E-04 | 2.07E-05 |
| 24h       | 2.85E-05 | 6.63E-05 | 2.64E-04 | 1.37E-05 |
| 36h       | 1.76E-05 | 4.31E-05 | 1.71E-04 | 2.53E-05 |
| 48h       | 1.05E-05 | 9.65E-06 | 6.74E-05 | 4.39E-06 |
| 72h       | 2.03E-06 | 6.80E-06 | 5.82E-05 | 1.16E-06 |
| cgd6_1920 |          |          |          |          |
| 2h        | 0.00E+00 | 0.00E+00 | 0.00E+00 | 0.00E+00 |
| 6h        | 0.00E+00 | 9.51E-10 | 1.01E-08 | 1.49E-09 |
| 12h       | 7.34E-09 | 1.74E-08 | 1.73E-07 | 8.80E-08 |
| 24h       | 2.33E-08 | 8.58E-08 | 1.67E-07 | 4.64E-08 |
| 36h       | 4.48E-07 | 1.31E-07 | 3.65E-07 | 5.26E-07 |
| 48h       | 1.45E-07 | 1.72E-07 | 1.52E-07 | 7.30E-08 |
| 72h       | 1.37E-07 | 8.42E-08 | 9.10E-08 | 6.92E-08 |
| cgd6_1980 |          |          |          |          |
| 2h        | 6.94E-07 | 1.72E-06 | 9.04E-07 | 3.23E-07 |
| 6h        | 1.45E-06 | 3.70E-06 | 5.34E-06 | 1.63E-06 |
| 12h       | 7.49E-08 | 9.32E-08 | 2.90E-06 | 4.86E-07 |
| 24h       | 4.17E-07 | 6.07E-07 | 3.39E-06 | 8.04E-07 |
| 36h       | 9.83E-07 | 1.81E-06 | 4.55E-06 | 1.11E-06 |
| 48h       | 4.84E-07 | 7.75E-07 | 2.83E-06 | 5.81E-07 |
| 72h       | 1.67E-07 | 3.49E-07 | 7.39E-07 | 1.28E-08 |
| cgd6_2010 |          |          |          |          |
| 2h        | 3.85E-09 | 0.00E+00 | 0.00E+00 | 1.83E-09 |
| 6h        | 2.16E-08 | 4.64E-07 | 2.75E-07 | 3.89E-07 |
| 12h       | 1.61E-08 | 1.88E-08 | 4.85E-08 | 2.88E-08 |
| 24h       | 5.49E-08 | 1.31E-07 | 4.34E-07 | 5.19E-07 |
| 36h       | 2.11E-07 | 3.99E-07 | 1.84E-07 | 4.54E-07 |
| 48h       | 1.19E-07 | 1.45E-07 | 1.24E-07 | 8.10E-08 |
| 72h       | 3.44E-08 | 5.92E-08 | 2.48E-08 | 1.20E-08 |
| cgd6_2050 |          |          |          |          |
| 2h        | 2.11E-04 | 9.76E-05 | 1.36E-04 | 5.19E-05 |
| 6h        | 3.64E-05 | 6.32E-05 | 1.39E-03 | 8.48E-05 |
| 12h       | 2.51E-05 | 1.92E-05 | 4.44E-04 | 1.73E-05 |
| 24h       | 5.95E-05 | 9.92E-05 | 7.46E-04 | 1.30E-04 |
| 36h       | 9.58E-05 | 8.81E-05 | 4.73E-04 | 3.63E-05 |
| 48h       | 7.83E-05 | 4.54E-05 | 3.20E-04 | 2.02E-05 |
| 72h       | 1.62E-05 | 3.28E-05 | 2.18E-04 | 2.20E-06 |
| cgd6_2160 |          |          |          |          |
| 2h        | 2.52E-05 | 4.10E-05 | 5.60E-06 | 1.58E-05 |
| 6h        | 2.96E-06 | 1.39E-05 | 6.52E-06 | 6.24E-06 |
| 12h       | 9.51E-07 | 9.05E-07 | 5.16E-06 | 3.32E-06 |
| 24h       | 6.45E-06 | 5.04E-06 | 5.85E-06 | 4.10E-06 |
| 36h       | 3.45E-06 | 3.32E-06 | 6.00E-06 | 5.73E-06 |
| 48h       | 6.25E-06 | 2.30E-06 | 4.73E-06 | 1.73E-05 |
| 72h       | 1.33E-06 | 9.97E-07 | 2.96E-06 | 1.17E-06 |
| cgd6_220  |          |          |          |          |
| 2h        | 3.23E-08 | 9.05E-08 | 1.01E-07 | 1.55E-07 |
| 6h        | 0.00E+00 | 1.29E-08 | 2.20E-09 | 7.36E-09 |
| 12h       | 1.84E-09 | 3.88E-08 | 3.64E-08 | 3.22E-08 |
| 24h       | 1.43E-08 | 4.74E-08 | 1.43E-08 | 5.81E-09 |
| 36h       | 1.82E-08 | 6.07E-08 | 1.51E-08 | 4.21E-08 |
| 48h       | 2.24E-08 | 5.72E-08 | 3.51E-08 | 1.21E-08 |

|     |           |          |          |          |
|-----|-----------|----------|----------|----------|
| 72h | 2.27E-08  | 3.04E-08 | 1.73E-08 | 1.41E-08 |
|     | cgd6_2230 |          |          |          |
| 2h  | 6.52E-07  | 5.39E-07 | 4.53E-07 | 3.12E-07 |
| 6h  | 9.20E-07  | 7.79E-07 | 2.01E-07 | 2.60E-07 |
| 12h | 1.09E-07  | 5.34E-08 | 5.13E-08 | 1.80E-07 |
| 24h | 5.78E-07  | 4.54E-07 | 3.89E-07 | 8.05E-07 |
| 36h | 5.00E-07  | 8.44E-07 | 2.85E-07 | 3.51E-07 |
| 48h | 7.39E-07  | 5.18E-07 | 2.15E-07 | 5.46E-07 |
| 72h | 3.65E-07  | 6.58E-07 | 1.85E-07 | 1.82E-07 |
|     | cgd6_2330 |          |          |          |
| 2h  | 3.40E-07  | 1.77E-06 | 1.82E-07 | 1.38E-08 |
| 6h  | 5.78E-07  | 3.88E-06 | 5.49E-07 | 7.42E-07 |
| 12h | 6.03E-04  | 8.15E-04 | 3.94E-04 | 3.98E-04 |
| 24h | 1.37E-04  | 2.14E-04 | 3.62E-05 | 7.51E-05 |
| 36h | 3.37E-05  | 6.25E-05 | 1.01E-04 | 1.07E-04 |
| 48h | 1.58E-05  | 1.39E-05 | 2.11E-05 | 2.33E-05 |
| 72h | 5.27E-06  | 6.52E-06 | 3.22E-06 | 2.25E-06 |
|     | cgd6_2400 |          |          |          |
| 2h  | 9.81E-08  | 3.76E-07 | 9.70E-08 | 2.30E-08 |
| 6h  | 8.33E-08  | 3.94E-07 | 2.41E-07 | 2.16E-07 |
| 12h | 9.17E-09  | 1.40E-08 | 1.42E-08 | 2.75E-08 |
| 24h | 2.17E-08  | 6.21E-08 | 7.85E-08 | 1.58E-07 |
| 36h | 8.69E-08  | 1.18E-07 | 9.29E-08 | 7.45E-08 |
| 48h | 1.32E-07  | 1.06E-07 | 1.77E-07 | 6.37E-08 |
| 72h | 1.65E-07  | 8.64E-08 | 2.80E-08 | 5.14E-08 |
|     | cgd6_2420 |          |          |          |
| 2h  | 2.09E-04  | 1.12E-04 | 1.76E-04 | 1.15E-04 |
| 6h  | 6.11E-04  | 9.71E-05 | 9.07E-04 | 5.47E-04 |
| 12h | 1.64E-05  | 3.00E-05 | 1.55E-04 | 1.33E-04 |
| 24h | 1.38E-04  | 2.74E-05 | 4.94E-04 | 5.70E-04 |
| 36h | 3.04E-04  | 3.34E-05 | 2.60E-04 | 2.70E-04 |
| 48h | 2.51E-04  | 2.30E-05 | 2.37E-04 | 2.33E-04 |
| 72h | 7.26E-05  | 7.24E-05 | 1.05E-04 | 1.88E-04 |
|     | cgd6_250  |          |          |          |
| 2h  | 0.00E+00  | 1.28E-06 | 0.00E+00 | 1.59E-07 |
| 6h  | 1.46E-06  | 1.47E-05 | 3.95E-06 | 2.28E-06 |
| 12h | 1.29E-08  | 1.65E-06 | 9.22E-08 | 1.07E-08 |
| 24h | 8.95E-07  | 1.19E-05 | 2.06E-06 | 6.35E-06 |
| 36h | 4.17E-06  | 1.64E-05 | 6.55E-06 | 7.33E-07 |
| 48h | 7.56E-06  | 1.39E-05 | 2.94E-06 | 5.59E-06 |
| 72h | 1.18E-05  | 2.12E-05 | 5.31E-07 | 2.67E-06 |
|     | cgd6_2530 |          |          |          |
| 2h  | 7.35E-05  | 6.92E-04 | 1.45E-04 | 6.46E-05 |
| 6h  | 2.25E-05  | 7.60E-05 | 1.84E-05 | 3.40E-05 |
| 12h | 1.72E-05  | 1.72E-04 | 2.92E-05 | 6.23E-05 |
| 24h | 4.96E-05  | 2.15E-04 | 4.94E-05 | 4.50E-05 |
| 36h | 8.15E-05  | 5.28E-05 | 7.15E-05 | 5.79E-05 |
| 48h | 1.09E-04  | 7.59E-05 | 7.12E-05 | 5.03E-05 |
| 72h | 7.17E-05  | 2.51E-04 | 4.41E-05 | 4.66E-05 |
|     | cgd6_260  |          |          |          |
| 2h  | 0.00E+00  | 0.00E+00 | 0.00E+00 | 0.00E+00 |
| 6h  | 9.77E-07  | 3.27E-05 | 7.79E-07 | 1.36E-07 |
| 12h | 2.68E-08  | 3.66E-07 | 6.77E-09 | 1.56E-07 |

|           |          |          |          |          |
|-----------|----------|----------|----------|----------|
| 24h       | 2.09E-07 | 3.28E-06 | 1.63E-06 | 4.37E-06 |
| 36h       | 3.99E-04 | 6.20E-05 | 5.93E-06 | 9.59E-06 |
| 48h       | 1.43E-05 | 5.74E-05 | 5.29E-06 | 7.56E-06 |
| 72h       | 3.74E-05 | 1.84E-05 | 3.45E-06 | 5.73E-06 |
| cgd6_2600 |          |          |          |          |
| 2h        | 4.77E-04 | 1.46E-03 | 9.74E-04 | 3.49E-04 |
| 6h        | 8.42E-06 | 5.03E-05 | 6.42E-05 | 1.46E-05 |
| 12h       | 2.67E-04 | 1.20E-03 | 4.78E-04 | 3.13E-04 |
| 24h       | 1.77E-04 | 3.95E-04 | 1.07E-04 | 1.43E-04 |
| 36h       | 1.03E-04 | 1.79E-04 | 2.76E-04 | 1.11E-04 |
| 48h       | 1.01E-04 | 1.13E-04 | 1.17E-04 | 7.28E-05 |
| 72h       | 5.87E-05 | 5.41E-05 | 2.75E-05 | 4.95E-05 |
| cgd6_2630 |          |          |          |          |
| 2h        | 3.35E-08 | 6.22E-09 | 9.30E-09 | 1.91E-08 |
| 6h        | 5.74E-08 | 3.57E-08 | 3.18E-08 | 4.19E-08 |
| 12h       | 8.73E-10 | 4.83E-09 | 3.72E-09 | 3.67E-09 |
| 24h       | 5.76E-09 | 1.24E-08 | 1.41E-08 | 5.98E-08 |
| 36h       | 3.45E-08 | 2.06E-08 | 1.79E-08 | 1.81E-08 |
| 48h       | 1.68E-08 | 2.29E-08 | 6.11E-09 | 3.61E-08 |
| 72h       | 2.35E-08 | 2.06E-08 | 1.27E-08 | 4.58E-09 |
| cgd6_2650 |          |          |          |          |
| 2h        | 3.03E-05 | 3.45E-04 | 4.86E-05 | 5.16E-05 |
| 6h        | 9.67E-06 | 1.77E-04 | 3.77E-05 | 4.58E-05 |
| 12h       | 2.54E-06 | 1.44E-05 | 2.83E-05 | 2.28E-05 |
| 24h       | 1.42E-05 | 1.27E-04 | 2.00E-05 | 6.20E-05 |
| 36h       | 1.28E-05 | 6.60E-05 | 1.87E-05 | 1.56E-05 |
| 48h       | 1.38E-05 | 3.80E-05 | 1.50E-05 | 7.50E-05 |
| 72h       | 8.05E-06 | 1.16E-05 | 9.44E-06 | 4.62E-06 |
| cgd6_2830 |          |          |          |          |
| 2h        | 5.22E-06 | 5.86E-05 | 1.07E-05 | 1.94E-05 |
| 6h        | 1.16E-05 | 3.08E-05 | 1.17E-05 | 3.76E-06 |
| 12h       | 4.84E-08 | 0.00E+00 | 5.52E-07 | 2.32E-07 |
| 24h       | 3.98E-06 | 3.98E-06 | 4.25E-06 | 6.04E-06 |
| 36h       | 1.03E-05 | 3.05E-05 | 9.24E-06 | 3.00E-06 |
| 48h       | 5.03E-06 | 5.00E-05 | 6.52E-05 | 8.70E-05 |
| 72h       | 1.43E-05 | 3.24E-05 | 1.00E-05 | 1.70E-05 |
| cgd6_2840 |          |          |          |          |
| 2h        | 3.18E-06 | 2.31E-06 | 1.70E-06 | 1.03E-06 |
| 6h        | 1.35E-07 | 1.04E-07 | 2.89E-07 | 9.08E-08 |
| 12h       | 2.89E-07 | 3.84E-07 | 3.71E-07 | 2.55E-07 |
| 24h       | 6.39E-07 | 3.99E-07 | 2.26E-07 | 2.17E-07 |
| 36h       | 9.42E-07 | 1.10E-06 | 1.05E-06 | 9.78E-07 |
| 48h       | 3.28E-06 | 2.27E-06 | 2.74E-06 | 2.05E-06 |
| 72h       | 2.11E-06 | 4.02E-06 | 9.99E-07 | 3.22E-06 |
| cgd6_2900 |          |          |          |          |
| 2h        | 0.00E+00 | 0.00E+00 | 0.00E+00 | 0.00E+00 |
| 6h        | 0.00E+00 | 0.00E+00 | 0.00E+00 | 0.00E+00 |
| 12h       | 0.00E+00 | 1.33E-05 | 1.80E-05 | 1.06E-07 |
| 24h       | 4.23E-06 | 7.96E-07 | 1.58E-06 | 1.74E-07 |
| 36h       | 2.66E-05 | 3.19E-06 | 6.76E-05 | 1.67E-06 |
| 48h       | 8.34E-05 | 6.66E-05 | 4.48E-04 | 4.00E-06 |
| 72h       | 6.24E-05 | 2.35E-05 | 2.87E-04 | 3.55E-06 |
| cgd6_2910 |          |          |          |          |

|           |          |          |          |          |
|-----------|----------|----------|----------|----------|
| 2h        | 0.00E+00 | 0.00E+00 | 0.00E+00 | 0.00E+00 |
| 6h        | 0.00E+00 | 0.00E+00 | 0.00E+00 | 0.00E+00 |
| 12h       | 1.48E-06 | 4.30E-06 | 3.34E-06 | 2.02E-06 |
| 24h       | 1.10E-05 | 1.09E-06 | 1.52E-05 | 5.69E-07 |
| 36h       | 1.30E-05 | 5.57E-06 | 9.78E-06 | 1.62E-06 |
| 48h       | 1.22E-04 | 1.94E-05 | 4.10E-04 | 2.06E-05 |
| 72h       | 2.17E-05 | 2.28E-05 | 1.09E-04 | 1.33E-05 |
| cgd6_2920 |          |          |          |          |
| 2h        | 0.00E+00 | 0.00E+00 | 0.00E+00 | 0.00E+00 |
| 6h        | 0.00E+00 | 0.00E+00 | 0.00E+00 | 0.00E+00 |
| 12h       | 0.00E+00 | 0.00E+00 | 0.00E+00 | 0.00E+00 |
| 24h       | 6.22E-08 | 7.45E-07 | 1.08E-07 | 3.14E-06 |
| 36h       | 3.35E-07 | 4.47E-06 | 6.03E-07 | 1.58E-05 |
| 48h       | 1.86E-05 | 3.26E-05 | 1.70E-05 | 2.42E-04 |
| 72h       | 1.08E-05 | 1.59E-04 | 1.60E-05 | 3.48E-04 |
| cgd6_300  |          |          |          |          |
| 2h        | 5.27E-09 | 0.00E+00 | 0.00E+00 | 0.00E+00 |
| 6h        | 0.00E+00 | 2.00E-09 | 0.00E+00 | 0.00E+00 |
| 12h       | 7.11E-10 | 1.34E-08 | 1.96E-08 | 2.18E-08 |
| 24h       | 7.70E-09 | 1.43E-08 | 4.47E-08 | 5.22E-08 |
| 36h       | 1.84E-08 | 2.15E-07 | 7.33E-08 | 3.25E-07 |
| 48h       | 2.55E-06 | 2.43E-06 | 2.33E-06 | 5.36E-06 |
| 72h       | 3.88E-06 | 3.25E-06 | 3.43E-06 | 3.63E-06 |
| cgd6_310  |          |          |          |          |
| 2h        | 1.53E-04 | 8.37E-05 | 3.87E-06 | 3.33E-05 |
| 6h        | 4.57E-04 | 2.36E-04 | 1.44E-04 | 2.44E-05 |
| 12h       | 1.53E-06 | 3.96E-06 | 1.30E-05 | 7.22E-06 |
| 24h       | 1.71E-04 | 1.81E-05 | 2.72E-04 | 9.10E-06 |
| 36h       | 4.48E-04 | 4.69E-05 | 9.83E-05 | 3.03E-05 |
| 48h       | 6.41E-04 | 2.04E-04 | 3.73E-04 | 6.99E-05 |
| 72h       | 1.89E-03 | 2.81E-04 | 2.05E-03 | 1.98E-04 |
| cgd6_3110 |          |          |          |          |
| 2h        | 1.84E-05 | 4.32E-05 | 9.19E-06 | 5.85E-05 |
| 6h        | 2.27E-07 | 8.62E-07 | 1.51E-07 | 4.04E-06 |
| 12h       | 9.47E-06 | 4.43E-05 | 1.17E-05 | 4.27E-05 |
| 24h       | 1.32E-05 | 1.31E-05 | 6.55E-06 | 1.25E-05 |
| 36h       | 4.97E-06 | 1.16E-05 | 1.41E-05 | 1.65E-05 |
| 48h       | 4.31E-06 | 4.36E-06 | 4.88E-06 | 7.40E-06 |
| 72h       | 1.28E-06 | 2.28E-06 | 3.17E-06 | 2.28E-06 |
| cgd6_320  |          |          |          |          |
| 2h        | 3.72E-07 | 7.83E-07 | 9.88E-08 | 3.27E-07 |
| 6h        | 2.18E-08 | 4.17E-08 | 3.59E-08 | 1.63E-07 |
| 12h       | 1.84E-07 | 2.35E-07 | 3.12E-07 | 3.40E-07 |
| 24h       | 2.26E-07 | 3.64E-07 | 2.19E-07 | 2.22E-07 |
| 36h       | 2.84E-07 | 3.20E-07 | 5.23E-07 | 4.50E-07 |
| 48h       | 2.08E-07 | 4.64E-07 | 2.83E-07 | 3.20E-07 |
| 72h       | 5.65E-07 | 5.74E-07 | 5.56E-07 | 8.28E-07 |
| cgd6_3200 |          |          |          |          |
| 2h        | 3.59E-07 | 8.38E-05 | 2.68E-06 | 1.31E-05 |
| 6h        | 0.00E+00 | 2.82E-05 | 0.00E+00 | 4.23E-06 |
| 12h       | 4.31E-06 | 0.00E+00 | 7.12E-06 | 4.33E-06 |
| 24h       | 4.42E-06 | 2.11E-05 | 1.65E-07 | 3.62E-05 |
| 36h       | 4.01E-05 | 1.62E-05 | 2.34E-05 | 2.36E-05 |



|     |           |          |          |          |
|-----|-----------|----------|----------|----------|
| 48h | 2.10E-04  | 4.39E-05 | 9.66E-05 | 1.84E-05 |
| 72h | 5.15E-04  | 3.31E-04 | 1.28E-03 | 4.99E-04 |
|     | cgd6_3320 |          |          |          |
| 2h  | 7.13E-06  | 3.40E-05 | 3.38E-05 | 1.87E-06 |
| 6h  | 2.02E-05  | 3.64E-05 | 1.75E-05 | 3.37E-06 |
| 12h | 0.00E+00  | 0.00E+00 | 2.58E-07 | 0.00E+00 |
| 24h | 1.06E-06  | 1.24E-06 | 2.41E-05 | 2.72E-06 |
| 36h | 7.02E-06  | 7.28E-06 | 1.24E-05 | 1.05E-06 |
| 48h | 4.09E-05  | 2.70E-06 | 3.08E-05 | 1.47E-06 |
| 72h | 6.32E-05  | 1.14E-05 | 1.12E-05 | 1.40E-06 |
|     | cgd6_3340 |          |          |          |
| 2h  | 7.11E-05  | 1.64E-04 | 1.63E-05 | 1.62E-04 |
| 6h  | 9.66E-05  | 2.94E-04 | 1.04E-04 | 1.18E-03 |
| 12h | 1.12E-05  | 7.37E-05 | 4.84E-05 | 1.99E-04 |
| 24h | 4.41E-05  | 1.41E-04 | 1.74E-04 | 3.09E-04 |
| 36h | 6.61E-05  | 7.43E-05 | 3.38E-05 | 1.44E-04 |
| 48h | 2.81E-05  | 5.58E-05 | 2.42E-05 | 1.12E-04 |
| 72h | 1.05E-05  | 9.62E-06 | 6.14E-06 | 3.83E-05 |
|     | cgd6_340  |          |          |          |
| 2h  | 3.46E-07  | 4.90E-07 | 1.45E-07 | 1.99E-07 |
| 6h  | 2.78E-07  | 7.54E-07 | 8.16E-07 | 1.24E-06 |
| 12h | 2.23E-07  | 7.59E-07 | 7.48E-07 | 4.63E-07 |
| 24h | 1.67E-07  | 2.54E-07 | 1.73E-06 | 6.72E-07 |
| 36h | 7.42E-07  | 5.91E-07 | 6.58E-07 | 1.28E-06 |
| 48h | 8.58E-07  | 6.40E-07 | 2.91E-06 | 1.23E-06 |
| 72h | 4.62E-07  | 3.65E-07 | 2.22E-07 | 4.74E-07 |
|     | cgd6_3440 |          |          |          |
| 2h  | 5.12E-04  | 1.32E-03 | 1.37E-04 | 3.04E-04 |
| 6h  | 1.93E-04  | 9.20E-04 | 9.01E-05 | 1.46E-04 |
| 12h | 1.07E-04  | 1.68E-04 | 2.63E-04 | 7.72E-04 |
| 24h | 3.41E-04  | 4.68E-04 | 3.91E-04 | 1.22E-04 |
| 36h | 2.58E-04  | 1.77E-04 | 2.39E-04 | 4.23E-04 |
| 48h | 1.25E-04  | 1.23E-04 | 1.66E-04 | 1.18E-04 |
| 72h | 6.16E-05  | 6.83E-05 | 4.61E-05 | 9.46E-05 |
|     | cgd6_3450 |          |          |          |
| 2h  | 9.60E-05  | 5.59E-05 | 4.31E-05 | 2.68E-05 |
| 6h  | 7.66E-05  | 1.07E-05 | 1.92E-05 | 8.05E-06 |
| 12h | 3.49E-05  | 2.96E-05 | 4.82E-05 | 7.76E-06 |
| 24h | 6.78E-05  | 5.26E-05 | 3.19E-05 | 1.56E-05 |
| 36h | 9.89E-06  | 1.39E-05 | 1.07E-05 | 6.42E-06 |
| 48h | 1.18E-05  | 1.97E-05 | 1.24E-05 | 9.44E-06 |
| 72h | 1.35E-05  | 1.40E-05 | 7.56E-06 | 2.26E-06 |
|     | cgd6_3460 |          |          |          |
| 2h  | 0.00E+00  | 5.42E-08 | 0.00E+00 | 0.00E+00 |
| 6h  | 0.00E+00  | 9.73E-09 | 1.05E-08 | 7.10E-10 |
| 12h | 3.41E-08  | 1.06E-08 | 6.72E-08 | 6.35E-09 |
| 24h | 6.25E-08  | 9.73E-09 | 1.61E-07 | 1.07E-05 |
| 36h | 2.78E-07  | 3.03E-07 | 4.62E-07 | 3.20E-07 |
| 48h | 8.70E-05  | 8.87E-05 | 6.25E-05 | 4.89E-05 |
| 72h | 9.38E-05  | 3.13E-04 | 8.28E-05 | 2.97E-05 |
|     | cgd6_3470 |          |          |          |
| 2h  | 1.06E-04  | 2.16E-04 | 5.53E-04 | 1.75E-05 |
| 6h  | 5.55E-05  | 7.38E-05 | 2.02E-04 | 4.12E-06 |

|     |           |          |          |          |
|-----|-----------|----------|----------|----------|
| 12h | 4.25E-03  | 4.66E-03 | 4.87E-03 | 8.15E-04 |
| 24h | 4.78E-04  | 3.66E-04 | 5.87E-04 | 3.38E-04 |
| 36h | 5.41E-04  | 1.64E-04 | 1.43E-03 | 5.12E-04 |
| 48h | 9.09E-05  | 1.47E-04 | 4.12E-04 | 1.27E-04 |
| 72h | 1.20E-04  | 3.48E-04 | 2.47E-04 | 6.21E-06 |
|     | cgd6_3480 |          |          |          |
| 2h  | 4.77E-05  | 1.26E-04 | 3.39E-05 | 2.65E-06 |
| 6h  | 5.57E-06  | 3.26E-06 | 5.92E-06 | 2.45E-06 |
| 12h | 1.83E-05  | 7.28E-06 | 2.38E-05 | 2.21E-06 |
| 24h | 2.58E-05  | 1.95E-05 | 6.85E-06 | 1.58E-06 |
| 36h | 1.55E-05  | 1.77E-05 | 1.12E-05 | 1.11E-06 |
| 48h | 4.95E-06  | 5.03E-06 | 2.30E-06 | 1.28E-06 |
| 72h | 2.11E-06  | 6.62E-06 | 5.59E-07 | 1.88E-07 |
|     | cgd6_3490 |          |          |          |
| 2h  | 7.78E-04  | 2.63E-04 | 1.71E-05 | 7.20E-07 |
| 6h  | 6.39E-04  | 8.44E-05 | 4.03E-05 | 1.89E-05 |
| 12h | 9.66E-05  | 5.13E-04 | 3.05E-04 | 3.12E-06 |
| 24h | 6.91E-05  | 8.65E-05 | 8.25E-05 | 2.51E-05 |
| 36h | 1.38E-04  | 7.72E-05 | 2.60E-04 | 2.98E-05 |
| 48h | 2.08E-04  | 2.55E-04 | 1.48E-04 | 1.09E-05 |
| 72h | 3.48E-05  | 1.91E-04 | 2.25E-05 | 8.25E-07 |
|     | cgd6_3530 |          |          |          |
| 2h  | 4.62E-06  | 1.14E-05 | 3.07E-06 | 1.91E-06 |
| 6h  | 3.93E-06  | 2.00E-06 | 3.75E-06 | 1.55E-06 |
| 12h | 1.40E-07  | 3.89E-07 | 2.51E-06 | 2.16E-07 |
| 24h | 1.11E-06  | 9.34E-07 | 2.77E-06 | 9.33E-07 |
| 36h | 1.58E-06  | 9.23E-07 | 1.40E-06 | 6.75E-07 |
| 48h | 9.38E-07  | 1.38E-06 | 8.75E-07 | 1.08E-06 |
| 72h | 3.91E-06  | 2.43E-06 | 1.99E-06 | 8.40E-07 |
|     | cgd6_3580 |          |          |          |
| 2h  | 6.19E-04  | 4.85E-04 | 3.30E-04 | 7.95E-05 |
| 6h  | 2.15E-04  | 4.82E-04 | 1.01E-03 | 2.00E-04 |
| 12h | 9.71E-05  | 5.50E-05 | 1.18E-03 | 1.75E-05 |
| 24h | 1.59E-04  | 1.54E-04 | 6.46E-04 | 8.92E-05 |
| 36h | 9.05E-05  | 6.02E-04 | 4.83E-04 | 6.28E-05 |
| 48h | 1.21E-04  | 2.01E-04 | 2.53E-04 | 2.70E-05 |
| 72h | 2.68E-04  | 3.16E-04 | 1.48E-04 | 1.51E-05 |
|     | cgd6_3600 |          |          |          |
| 2h  | 0.00E+00  | 0.00E+00 | 0.00E+00 | 0.00E+00 |
| 6h  | 0.00E+00  | 0.00E+00 | 0.00E+00 | 0.00E+00 |
| 12h | 1.22E-08  | 9.24E-08 | 2.86E-07 | 3.94E-09 |
| 24h | 2.07E-08  | 1.48E-08 | 5.70E-08 | 3.24E-08 |
| 36h | 1.54E-07  | 4.27E-08 | 1.65E-07 | 5.19E-08 |
| 48h | 3.24E-07  | 4.51E-07 | 5.33E-07 | 3.40E-07 |
| 72h | 7.41E-07  | 1.41E-06 | 1.03E-06 | 7.23E-07 |
|     | cgd6_3630 |          |          |          |
| 2h  | 0.00E+00  | 0.00E+00 | 0.00E+00 | 0.00E+00 |
| 6h  | 0.00E+00  | 0.00E+00 | 1.64E-08 | 6.82E-10 |
| 12h | 1.75E-05  | 1.49E-05 | 1.87E-05 | 2.31E-06 |
| 24h | 3.09E-06  | 3.48E-06 | 2.16E-06 | 7.41E-07 |
| 36h | 1.61E-06  | 1.48E-06 | 4.58E-06 | 3.42E-06 |
| 48h | 1.23E-06  | 7.24E-07 | 1.32E-06 | 1.71E-06 |
| 72h | 1.05E-06  | 1.13E-06 | 7.99E-07 | 3.74E-07 |

|     |           |          |          |          |
|-----|-----------|----------|----------|----------|
|     | cgd6_3670 |          |          |          |
| 2h  | 7.87E-08  | 0.00E+00 | 0.00E+00 | 4.14E-08 |
| 6h  | 1.41E-07  | 5.37E-08 | 2.52E-07 | 5.82E-08 |
| 12h | 4.66E-07  | 3.25E-08 | 7.50E-07 | 1.24E-07 |
| 24h | 1.49E-07  | 3.31E-07 | 3.94E-07 | 1.78E-07 |
| 36h | 5.74E-07  | 1.72E-07 | 7.90E-07 | 1.97E-07 |
| 48h | 6.44E-07  | 6.96E-07 | 1.05E-06 | 8.72E-07 |
| 72h | 1.11E-06  | 1.69E-06 | 1.80E-06 | 7.87E-07 |
|     | cgd6_3760 |          |          |          |
| 2h  | 5.41E-06  | 3.14E-05 | 1.27E-06 | 2.01E-06 |
| 6h  | 1.01E-06  | 3.28E-07 | 1.19E-06 | 9.61E-07 |
| 12h | 7.31E-07  | 1.35E-06 | 3.40E-06 | 9.62E-07 |
| 24h | 1.50E-06  | 1.93E-06 | 1.60E-06 | 1.39E-06 |
| 36h | 1.26E-06  | 2.05E-06 | 1.04E-06 | 1.22E-06 |
| 48h | 3.85E-07  | 9.60E-07 | 4.53E-07 | 1.14E-06 |
| 72h | 6.65E-07  | 1.58E-06 | 8.83E-07 | 4.88E-07 |
|     | cgd6_3850 |          |          |          |
| 2h  | 1.10E-02  | 4.90E-03 | 1.21E-01 | 5.09E-03 |
| 6h  | 1.27E-02  | 2.81E-03 | 5.03E-02 | 1.08E-02 |
| 12h | 6.67E-03  | 4.33E-03 | 6.70E-02 | 8.32E-04 |
| 24h | 1.05E-02  | 4.61E-03 | 5.92E-02 | 2.57E-03 |
| 36h | 1.74E-03  | 9.26E-04 | 1.28E-02 | 2.40E-03 |
| 48h | 6.32E-04  | 8.56E-04 | 1.52E-02 | 1.38E-03 |
| 72h | 6.35E-04  | 2.35E-04 | 8.42E-03 | 5.65E-03 |
|     | cgd6_390  |          |          |          |
| 2h  | 4.80E-07  | 0.00E+00 | 0.00E+00 | 2.32E+11 |
| 6h  | 0.00E+00  | 0.00E+00 | 0.00E+00 | 2.67E+03 |
| 12h | 5.91E-05  | 2.07E-05 | 4.79E-04 | 2.67E-06 |
| 24h | 7.07E-05  | 2.99E-05 | 1.76E-04 | 4.11E-07 |
| 36h | 1.32E-05  | 2.70E-06 | 1.88E-04 | 1.84E-06 |
| 48h | 2.53E-04  | 2.64E-05 | 8.25E-04 | 1.23E-05 |
| 72h | 4.41E-04  | 6.27E-05 | 1.49E-03 | 3.45E-05 |
|     | cgd6_3910 |          |          |          |
| 2h  | 1.32E-03  | 1.30E-03 | 7.60E-03 | 4.63E-03 |
| 6h  | 3.09E-04  | 1.24E-04 | 3.07E-03 | 1.86E-05 |
| 12h | 3.67E-03  | 4.36E-03 | 6.51E-02 | 1.79E-03 |
| 24h | 1.10E-03  | 1.03E-03 | 8.48E-03 | 1.85E-03 |
| 36h | 8.23E-04  | 9.74E-05 | 9.04E-03 | 3.48E-03 |
| 48h | 8.42E-04  | 1.65E-04 | 5.65E-03 | 1.43E-03 |
| 72h | 5.58E-04  | 9.33E-05 | 7.70E-03 | 2.53E-04 |
|     | cgd6_3930 |          |          |          |
| 2h  | 2.67E-07  | 2.62E-07 | 0.00E+00 | 3.58E+06 |
| 6h  | 1.60E-07  | 1.60E-08 | 0.00E+00 | 2.71E-06 |
| 12h | 1.19E-03  | 6.26E-04 | 9.85E-03 | 1.53E-04 |
| 24h | 1.88E-04  | 5.35E-05 | 6.62E-04 | 6.94E-05 |
| 36h | 1.15E-04  | 2.05E-05 | 2.71E-03 | 3.27E-04 |
| 48h | 1.29E-04  | 2.08E-05 | 3.90E-04 | 2.92E-05 |
| 72h | 3.90E-04  | 3.44E-05 | 1.45E-03 | 2.05E-04 |
|     | cgd6_3970 |          |          |          |
| 2h  | 8.15E-07  | 2.92E-07 | 4.63E-07 | 7.76E-08 |
| 6h  | 2.85E-07  | 2.94E-07 | 1.14E-06 | 1.70E-07 |
| 12h | 2.53E-07  | 5.88E-08 | 6.85E-07 | 2.64E-08 |
| 24h | 3.10E-07  | 1.69E-07 | 5.12E-07 | 3.20E-07 |

|     |           |          |          |          |
|-----|-----------|----------|----------|----------|
| 36h | 0.00E+00  | 5.25E-08 | 2.97E-07 | 2.53E-07 |
| 48h | 1.13E-07  | 4.47E-08 | 2.00E-07 | 0.00E+00 |
| 72h | 9.11E-08  | 5.04E-08 | 1.19E-07 | 3.09E-07 |
|     | cgd6_3980 |          |          |          |
| 2h  | 9.23E-04  | 1.21E-04 | 1.17E-02 | 1.40E-04 |
| 6h  | 3.94E-04  | 2.18E-05 | 9.24E-03 | 3.56E-05 |
| 12h | 5.29E-04  | 1.35E-04 | 1.26E-02 | 1.14E-04 |
| 24h | 8.53E-04  | 2.48E-04 | 6.26E-03 | 3.09E-04 |
| 36h | 4.01E-04  | 8.16E-05 | 5.54E-03 | 3.16E-04 |
| 48h | 1.90E-04  | 5.15E-05 | 5.17E-03 | 4.73E-04 |
| 72h | 3.78E-04  | 2.70E-05 | 1.84E-03 | 6.65E-05 |
|     | cgd6_4010 |          |          |          |
| 2h  | 5.46E-08  | 0.00E+00 | 0.00E+00 | 4.26E+05 |
| 6h  | 0.00E+00  | 0.00E+00 | 0.00E+00 | 2.26E+05 |
| 12h | 6.75E-08  | 9.87E-08 | 7.07E-06 | 1.90E-02 |
| 24h | 9.94E-08  | 1.78E-07 | 6.24E-07 | 1.13E-07 |
| 36h | 4.06E-07  | 1.95E-07 | 2.65E-06 | 2.65E-06 |
| 48h | 1.92E-06  | 7.44E-07 | 3.88E-06 | 4.47E-06 |
| 72h | 1.25E-06  | 2.62E-07 | 6.38E-06 | 1.71E-06 |
|     | cgd6_4190 |          |          |          |
| 2h  | 9.41E-06  | 3.33E-06 | 2.46E-05 | 9.83E-06 |
| 6h  | 7.97E-06  | 7.34E-06 | 1.78E-05 | 4.74E-05 |
| 12h | 1.30E-06  | 7.23E-07 | 7.16E-06 | 2.92E-06 |
| 24h | 1.54E-06  | 4.67E-06 | 5.59E-06 | 1.36E-05 |
| 36h | 2.08E-06  | 1.40E-06 | 2.10E-06 | 1.07E-05 |
| 48h | 1.71E-06  | 7.69E-07 | 2.06E-06 | 7.24E-06 |
| 72h | 1.05E-06  | 5.25E-07 | 1.26E-06 | 2.01E-06 |
|     | cgd6_4210 |          |          |          |
| 2h  | 2.51E-07  | 1.25E-07 | 8.10E-07 | 6.07E-08 |
| 6h  | 8.09E-09  | 2.44E-09 | 7.70E-08 | 1.63E+03 |
| 12h | 5.80E-07  | 7.99E-07 | 2.13E-06 | 8.26E-04 |
| 24h | 7.37E-07  | 5.49E-07 | 1.02E-06 | 4.51E-07 |
| 36h | 1.19E-06  | 6.25E-07 | 2.09E-06 | 1.62E-06 |
| 48h | 1.94E-06  | 6.36E-07 | 2.03E-06 | 3.00E-07 |
| 72h | 1.89E-06  | 7.31E-07 | 3.74E-06 | 1.42E-06 |
|     | cgd6_4250 |          |          |          |
| 2h  | 1.77E-05  | 0.00E+00 | 0.00E+00 | 2.20E+05 |
| 6h  | 2.71E-04  | 4.02E-04 | 2.89E-02 | 5.69E-03 |
| 12h | 6.14E-05  | 6.29E-04 | 1.96E-02 | 1.16E-04 |
| 24h | 1.11E-04  | 8.20E-05 | 6.57E-02 | 3.47E-03 |
| 36h | 1.60E-04  | 2.62E-04 | 5.60E-02 | 6.17E-04 |
| 48h | 1.19E-04  | 2.16E-04 | 9.64E-02 | 2.35E-03 |
| 72h | 3.11E-04  | 2.09E-04 | 2.10E-02 | 2.01E-06 |
|     | cgd6_4260 |          |          |          |
| 2h  | 2.30E-06  | 2.54E-07 | 2.55E-06 | 1.42E-06 |
| 6h  | 4.46E-07  | 1.46E-07 | 1.68E-07 | 2.95E-07 |
| 12h | 1.13E-06  | 2.45E-08 | 5.38E-07 | 3.78E-07 |
| 24h | 4.80E-07  | 4.46E-07 | 2.95E-07 | 4.79E-08 |
| 36h | 1.62E-07  | 7.01E-08 | 1.22E-07 | 2.07E-07 |
| 48h | 2.29E-07  | 8.12E-08 | 1.34E-07 | 2.12E-07 |
| 72h | 6.76E-08  | 4.50E-08 | 8.63E-08 | 3.99E-09 |
|     | cgd6_430  |          |          |          |
| 2h  | 0.00E+00  | 0.00E+00 | 0.00E+00 | 2.35E+06 |

|     |           |          |          |          |
|-----|-----------|----------|----------|----------|
| 6h  | 0.00E+00  | 1.92E-09 | 0.00E+00 | 2.36E+04 |
| 12h | 9.00E-08  | 7.97E-08 | 5.53E-08 | 4.44E-09 |
| 24h | 1.53E-07  | 2.24E-08 | 1.69E-08 | 8.82E-08 |
| 36h | 9.20E-08  | 2.22E-08 | 1.37E-07 | 2.11E-07 |
| 48h | 8.83E-08  | 3.07E-08 | 1.39E-07 | 1.38E-07 |
| 72h | 1.89E-07  | 1.15E-07 | 3.72E-08 | 4.92E-07 |
|     | cgd6_4300 |          |          |          |
| 2h  | 0.00E+00  | 0.00E+00 | 0.00E+00 | 0.00E+00 |
| 6h  | 0.00E+00  | 0.00E+00 | 4.77E-09 | 0.00E+00 |
| 12h | 5.29E-09  | 8.52E-08 | 1.12E-08 | 2.10E-09 |
| 24h | 1.78E-08  | 7.55E-08 | 3.04E-07 | 8.84E-08 |
| 36h | 4.32E-07  | 6.47E-07 | 1.20E-07 | 1.79E-07 |
| 48h | 1.61E-07  | 3.90E-07 | 1.83E-07 | 5.59E-08 |
| 72h | 1.83E-07  | 1.49E-07 | 3.60E-07 | 1.68E-08 |
|     | cgd6_4450 |          |          |          |
| 2h  | 6.20E-08  | 8.03E-08 | 3.64E-09 | 6.43E-09 |
| 6h  | 2.25E-07  | 6.92E-07 | 6.57E-07 | 5.54E-07 |
| 12h | 2.31E-07  | 5.24E-07 | 1.68E-07 | 8.76E-08 |
| 24h | 1.69E-07  | 4.21E-07 | 5.89E-07 | 3.61E-07 |
| 36h | 1.37E-07  | 2.59E-07 | 2.13E-07 | 3.33E-07 |
| 48h | 4.00E-06  | 3.01E-06 | 4.31E-06 | 6.78E-06 |
| 72h | 4.75E-06  | 3.27E-06 | 6.81E-06 | 7.24E-06 |
|     | cgd6_450  |          |          |          |
| 2h  | 2.80E-05  | 7.04E-06 | 1.95E-07 | 4.35E-07 |
| 6h  | 8.35E-06  | 9.99E-06 | 8.92E-07 | 7.16E-04 |
| 12h | 4.97E-07  | 2.81E-07 | 7.85E-07 | 7.29E-07 |
| 24h | 4.13E-06  | 1.15E-05 | 3.55E-06 | 3.79E-06 |
| 36h | 1.05E-05  | 6.85E-06 | 2.54E-06 | 1.48E-06 |
| 48h | 7.11E-06  | 8.95E-06 | 2.94E-06 | 1.69E-06 |
| 72h | 7.58E-06  | 3.20E-06 | 7.62E-07 | 8.44E-07 |
|     | cgd6_4520 |          |          |          |
| 2h  | 1.22E-07  | 4.35E-07 | 2.13E-08 | 5.87E-08 |
| 6h  | 2.54E-07  | 1.82E-06 | 1.32E-06 | 3.38E-07 |
| 12h | 1.40E-06  | 1.49E-06 | 4.51E-07 | 2.04E-07 |
| 24h | 9.84E-07  | 3.65E-06 | 9.09E-07 | 5.08E-07 |
| 36h | 9.25E-07  | 1.75E-06 | 8.37E-07 | 1.31E-06 |
| 48h | 5.09E-06  | 2.88E-06 | 2.37E-06 | 1.85E-06 |
| 72h | 4.40E-06  | 3.62E-06 | 1.10E-05 | 5.97E-06 |
|     | cgd6_4560 |          |          |          |
| 2h  | 2.32E-04  | 1.73E-04 | 1.66E-06 | 3.56E-06 |
| 6h  | 2.90E-05  | 1.83E-04 | 1.82E-06 | 8.87E-06 |
| 12h | 1.87E-04  | 1.36E-04 | 4.95E-05 | 2.95E-05 |
| 24h | 1.04E-04  | 3.17E-04 | 4.59E-05 | 3.05E-05 |
| 36h | 2.29E-04  | 2.40E-04 | 1.24E-04 | 1.18E-04 |
| 48h | 2.78E-04  | 1.24E-04 | 4.93E-05 | 7.43E-05 |
| 72h | 3.14E-04  | 1.62E-04 | 6.12E-05 | 2.75E-05 |
|     | cgd6_4620 |          |          |          |
| 2h  | 1.83E-04  | 1.01E-04 | 1.94E-05 | 1.86E-05 |
| 6h  | 7.31E-04  | 2.83E-04 | 6.14E-05 | 4.42E-05 |
| 12h | 2.71E-05  | 2.49E-05 | 1.03E-04 | 1.80E-05 |
| 24h | 4.26E-05  | 5.51E-05 | 4.39E-05 | 4.04E-05 |
| 36h | 4.78E-05  | 3.84E-05 | 2.19E-05 | 1.78E-05 |
| 48h | 2.23E-05  | 2.67E-05 | 1.73E-05 | 1.17E-05 |

|     |           |          |          |          |
|-----|-----------|----------|----------|----------|
| 72h | 3.40E-06  | 2.58E-06 | 2.31E-06 | 2.05E-06 |
|     | cgd6_4690 |          |          |          |
| 2h  | 7.70E-06  | 4.59E-06 | 4.05E-07 | 1.54E-06 |
| 6h  | 1.12E-05  | 8.89E-06 | 1.04E-06 | 1.17E-06 |
| 12h | 6.27E-07  | 1.08E-06 | 1.82E-06 | 7.47E-07 |
| 24h | 1.45E-06  | 3.67E-06 | 1.90E-06 | 2.56E-06 |
| 36h | 1.60E-06  | 2.25E-06 | 2.98E-06 | 3.10E-06 |
| 48h | 2.02E-06  | 1.49E-06 | 5.47E-07 | 6.60E-07 |
| 72h | 5.72E-07  | 5.90E-07 | 9.92E-07 | 9.27E-07 |
|     | cgd6_4820 |          |          |          |
| 2h  | 2.86E-06  | 0.00E+00 | 0.00E+00 | 0.00E+00 |
| 6h  | 0.00E+00  | 0.00E+00 | 4.65E-08 | 1.43E-08 |
| 12h | 6.40E-07  | 2.29E-06 | 2.48E-08 | 2.14E-08 |
| 24h | 1.95E-07  | 4.34E-07 | 9.18E-08 | 1.53E-08 |
| 36h | 4.86E-07  | 5.45E-07 | 4.06E-07 | 1.74E-07 |
| 48h | 1.17E-05  | 2.56E-06 | 7.37E-07 | 9.28E-07 |
| 72h | 1.08E-05  | 4.41E-06 | 8.06E-06 | 5.64E-06 |
|     | cgd6_4830 |          |          |          |
| 2h  | 7.51E-04  | 2.25E-03 | 3.93E-05 | 1.54E-04 |
| 6h  | 2.87E-04  | 3.29E-04 | 5.31E-05 | 7.51E-05 |
| 12h | 1.71E-04  | 2.38E-04 | 1.73E-04 | 1.12E-04 |
| 24h | 2.39E-04  | 8.77E-04 | 1.18E-04 | 1.10E-04 |
| 36h | 2.71E-04  | 3.10E-04 | 6.48E-05 | 6.18E-05 |
| 48h | 2.32E-04  | 2.66E-04 | 9.05E-05 | 4.14E-05 |
| 72h | 3.99E-04  | 1.64E-04 | 5.68E-05 | 4.76E-05 |
|     | cgd6_4860 |          |          |          |
| 2h  | 7.06E-04  | 7.66E-04 | 3.51E-05 | 1.86E-04 |
| 6h  | 1.44E-05  | 7.67E-05 | 1.62E-05 | 1.97E-05 |
| 12h | 1.04E-04  | 1.28E-04 | 5.45E-05 | 3.25E-05 |
| 24h | 5.25E-03  | 1.62E-04 | 8.55E-05 | 5.57E-05 |
| 36h | 4.66E-05  | 6.99E-05 | 2.72E-05 | 1.64E-05 |
| 48h | 7.01E-05  | 3.55E-05 | 2.56E-05 | 2.08E-05 |
| 72h | 1.89E-05  | 1.65E-05 | 7.97E-06 | 9.59E-06 |
|     | cgd6_4980 |          |          |          |
| 2h  | 0.00E+00  | 0.00E+00 | 0.00E+00 | 0.00E+00 |
| 6h  | 0.00E+00  | 0.00E+00 | 0.00E+00 | 0.00E+00 |
| 12h | 1.16E-07  | 2.40E-07 | 1.52E-07 | 1.37E-07 |
| 24h | 4.30E-08  | 9.32E-08 | 1.06E-07 | 4.17E-08 |
| 36h | 3.54E-08  | 6.77E-08 | 1.71E-07 | 1.78E-07 |
| 48h | 3.80E-08  | 1.25E-06 | 1.25E-07 | 7.30E-08 |
| 72h | 7.70E-09  | 1.89E-08 | 7.75E-09 | 1.43E-08 |
|     | cgd6_5100 |          |          |          |
| 2h  | 0.00E+00  | 0.00E+00 | 0.00E+00 | 0.00E+00 |
| 6h  | 1.97E-06  | 6.07E-04 | 1.34E-05 | 5.48E-06 |
| 12h | 0.00E+00  | 7.89E-04 | 8.03E-05 | 4.09E-06 |
| 24h | 4.16E-06  | 8.33E-02 | 1.43E-04 | 5.00E-05 |
| 36h | 8.59E-05  | 1.59E-01 | 8.18E-05 | 1.46E-04 |
| 48h | 2.09E-05  | 1.33E-01 | 4.40E-05 | 1.56E-05 |
| 72h | 1.27E-05  | 6.59E-02 | 4.61E-05 | 1.64E-05 |
|     | cgd6_5120 |          |          |          |
| 2h  | 3.56E-06  | 1.25E-06 | 4.60E-07 | 1.94E-06 |
| 6h  | 3.34E-06  | 1.06E-06 | 1.45E-06 | 1.49E-06 |
| 12h | 7.23E-07  | 1.59E-07 | 6.05E-07 | 4.19E-07 |

|           |          |          |          |          |
|-----------|----------|----------|----------|----------|
| 24h       | 2.39E-06 | 1.44E-06 | 1.23E-06 | 7.61E-07 |
| 36h       | 7.75E-07 | 6.14E-07 | 4.26E-07 | 4.79E-07 |
| 48h       | 3.85E-07 | 2.83E-07 | 4.66E-07 | 4.31E-07 |
| 72h       | 1.53E-07 | 8.90E-08 | 2.44E-07 | 2.11E-07 |
| cgd6_5220 |          |          |          |          |
| 2h        | 2.07E-07 | 0.00E+00 | 0.00E+00 | 0.00E+00 |
| 6h        | 0.00E+00 | 0.00E+00 | 0.00E+00 | 0.00E+00 |
| 12h       | 4.35E-07 | 5.13E-09 | 9.83E-06 | 5.77E-08 |
| 24h       | 4.09E-07 | 2.85E-08 | 2.23E-08 | 1.61E-08 |
| 36h       | 1.13E-07 | 2.05E-08 | 2.18E-07 | 3.09E-07 |
| 48h       | 3.27E-06 | 6.35E-07 | 2.39E-06 | 2.16E-06 |
| 72h       | 7.30E-06 | 4.17E-06 | 7.34E-06 | 1.46E-05 |
| cgd6_5230 |          |          |          |          |
| 2h        | 0.00E+00 | 1.65E-08 | 0.00E+00 | 7.98E-08 |
| 6h        | 7.46E-07 | 0.00E+00 | 0.00E+00 | 2.58E-08 |
| 12h       | 1.35E-07 | 9.01E-08 | 3.32E-08 | 1.64E-08 |
| 24h       | 9.66E-08 | 3.76E-08 | 1.85E-08 | 1.57E-08 |
| 36h       | 7.75E-08 | 5.49E-08 | 9.84E-08 | 1.05E-07 |
| 48h       | 1.46E-06 | 7.52E-07 | 1.00E-06 | 9.62E-07 |
| 72h       | 2.62E-06 | 3.48E-06 | 7.07E-06 | 1.18E-04 |
| cgd6_5270 |          |          |          |          |
| 2h        | 3.60E-06 | 1.37E-06 | 3.92E-07 | 1.53E-06 |
| 6h        | 4.44E-06 | 1.14E-06 | 2.83E-06 | 1.37E-06 |
| 12h       | 3.87E-06 | 1.43E-05 | 4.59E-06 | 2.94E-06 |
| 24h       | 1.29E-06 | 9.93E-07 | 1.11E-06 | 7.46E-07 |
| 36h       | 7.51E-07 | 1.76E-06 | 2.42E-06 | 5.26E-06 |
| 48h       | 7.78E-07 | 5.65E-07 | 9.14E-07 | 8.19E-07 |
| 72h       | 2.17E-07 | 4.31E-07 | 7.41E-07 | 8.83E-07 |
| cgd6_5430 |          |          |          |          |
| 2h        | 3.59E-05 | 4.32E-05 | 3.69E-05 | 7.51E-05 |
| 6h        | 9.15E-05 | 2.32E-05 | 3.85E-05 | 2.86E-05 |
| 12h       | 1.13E-05 | 1.09E-05 | 2.91E-05 | 1.59E-05 |
| 24h       | 1.86E-05 | 1.20E-05 | 2.57E-05 | 1.23E-05 |
| 36h       | 8.59E-06 | 9.50E-06 | 1.43E-05 | 1.56E-05 |
| 48h       | 5.52E-06 | 2.69E-06 | 8.01E-06 | 6.15E-06 |
| 72h       | 9.61E-07 | 1.65E-06 | 2.30E-06 | 2.45E-06 |
| cgd6_5470 |          |          |          |          |
| 2h        | 2.03E-06 | 0.00E+00 | 0.00E+00 | 0.00E+00 |
| 6h        | 0.00E+00 | 0.00E+00 | 0.00E+00 | 0.00E+00 |
| 12h       | 1.20E-06 | 0.00E+00 | 1.97E-06 | 8.69E-07 |
| 24h       | 2.29E-07 | 2.74E-05 | 8.51E-07 | 3.88E-06 |
| 36h       | 5.03E-07 | 1.36E-05 | 4.49E-06 | 5.28E-06 |
| 48h       | 5.87E-07 | 7.57E-06 | 2.41E-06 | 1.90E-06 |
| 72h       | 7.75E-07 | 1.17E-05 | 4.27E-06 | 2.54E-06 |
| cgd6_550  |          |          |          |          |
| 2h        | 0.00E+00 | 0.00E+00 | 3.71E-06 | 0.00E+00 |
| 6h        | 0.00E+00 | 4.91E-09 | 0.00E+00 | 0.00E+00 |
| 12h       | 0.00E+00 | 0.00E+00 | 0.00E+00 | 1.84E-07 |
| 24h       | 2.49E-06 | 1.30E-07 | 8.34E-07 | 5.48E-07 |
| 36h       | 1.87E-06 | 6.61E-07 | 1.00E-05 | 8.57E-06 |
| 48h       | 7.48E-05 | 4.01E-05 | 1.05E-03 | 5.38E-04 |
| 72h       | 7.79E-05 | 1.76E-04 | 1.05E-03 | 1.33E-03 |
| cgd6_5500 |          |          |          |          |

|     |          |          |          |          |
|-----|----------|----------|----------|----------|
| 2h  | 1.27E-05 | 4.62E-07 | 0.00E+00 | 7.20E-05 |
| 6h  | 7.78E-06 | 2.77E-06 | 4.59E-05 | 1.84E-05 |
| 12h | 4.09E-06 | 1.66E-06 | 3.60E-05 | 7.14E-06 |
| 24h | 1.94E-05 | 2.74E-06 | 1.32E-05 | 4.47E-05 |
| 36h | 5.24E-06 | 8.76E-07 | 2.54E-05 | 5.16E-05 |
| 48h | 4.27E-06 | 5.89E-07 | 1.59E-05 | 4.89E-05 |
| 72h | 3.76E-06 | 9.82E-08 | 4.61E-06 | 0.00E+00 |
|     | cgd6_630 |          |          |          |
| 2h  | 3.59E-05 | 1.14E-06 | 3.26E-06 | 9.19E-06 |
| 6h  | 1.54E-05 | 9.32E-07 | 1.74E-06 | 3.27E-06 |
| 12h | 1.57E-05 | 1.54E-06 | 9.62E-06 | 1.06E-05 |
| 24h | 1.10E-05 | 4.28E-06 | 2.23E-06 | 2.86E-06 |
| 36h | 9.29E-06 | 1.32E-06 | 5.07E-06 | 4.25E-06 |
| 48h | 2.83E-06 | 6.12E-07 | 4.36E-06 | 3.39E-06 |
| 72h | 3.51E-06 | 6.13E-07 | 2.79E-06 | 2.09E-06 |
|     | cgd6_660 |          |          |          |
| 2h  | 0.00E+00 | 0.00E+00 | 0.00E+00 | 1.03E-05 |
| 6h  | 1.27E-06 | 1.53E-06 | 2.32E-05 | 1.98E-05 |
| 12h | 2.37E-07 | 1.18E-06 | 8.18E-06 | 6.14E-07 |
| 24h | 3.75E-07 | 7.06E-05 | 6.00E-06 | 1.32E-05 |
| 36h | 2.12E-06 | 1.68E-04 | 1.40E-05 | 8.88E-05 |
| 48h | 8.12E-06 | 3.57E-05 | 5.19E-05 | 5.47E-05 |
| 72h | 1.12E-05 | 2.50E-04 | 2.21E-04 | 4.59E-05 |
|     | cgd6_700 |          |          |          |
| 2h  | 0.00E+00 | 0.00E+00 | 0.00E+00 | 0.00E+00 |
| 6h  | 1.86E-04 | 1.66E-06 | 9.10E-06 | 3.80E-06 |
| 12h | 9.84E-06 | 1.98E-07 | 5.07E-07 | 1.99E-07 |
| 24h | 3.79E-06 | 9.60E-07 | 3.35E-06 | 4.09E-06 |
| 36h | 3.94E-05 | 1.59E-06 | 1.11E-06 | 3.57E-06 |
| 48h | 2.13E-05 | 4.38E-07 | 2.10E-06 | 4.20E-06 |
| 72h | 1.19E-06 | 2.76E-07 | 1.59E-07 | 1.57E-07 |
|     | cgd6_750 |          |          |          |
| 2h  | 2.43E-06 | 3.39E-06 | 2.60E-05 | 4.11E-05 |
| 6h  | 5.26E-06 | 2.24E-04 | 1.31E-04 | 1.49E-04 |
| 12h | 3.27E-06 | 1.72E-05 | 6.48E-05 | 1.12E-04 |
| 24h | 6.64E-06 | 1.61E-04 | 2.90E-04 | 7.83E-05 |
| 36h | 1.08E-05 | 1.04E-04 | 1.44E-04 | 5.38E-04 |
| 48h | 2.79E-05 | 4.10E-04 | 2.16E-04 | 5.21E-04 |
| 72h | 4.77E-05 | 2.45E-03 | 7.95E-04 | 5.01E-04 |
|     | cgd6_810 |          |          |          |
| 2h  | 5.35E-05 | 0.00E+00 | 0.00E+00 | 1.48E-05 |
| 6h  | 4.12E-05 | 2.20E-05 | 5.71E-05 | 3.84E-05 |
| 12h | 3.62E-05 | 1.88E-05 | 5.53E-05 | 2.59E-05 |
| 24h | 2.34E-05 | 6.23E-06 | 8.34E-05 | 2.05E-05 |
| 36h | 3.20E-04 | 2.04E-05 | 5.91E-05 | 1.32E-05 |
| 48h | 1.67E-04 | 2.42E-05 | 6.38E-05 | 9.85E-05 |
| 72h | 6.29E-04 | 3.10E-05 | 3.12E-04 | 7.23E-04 |
|     | cgd6_830 |          |          |          |
| 2h  | 2.93E-06 | 3.21E-06 | 1.13E-06 | 2.31E-06 |
| 6h  | 2.98E-06 | 1.04E-05 | 2.36E-06 | 4.10E-06 |
| 12h | 2.65E-07 | 5.32E-07 | 1.19E-06 | 1.38E-06 |
| 24h | 2.83E-06 | 4.48E-06 | 4.16E-06 | 8.58E-06 |
| 36h | 2.29E-06 | 3.50E-06 | 2.08E-06 | 3.33E-06 |



|     |           |          |          |          |
|-----|-----------|----------|----------|----------|
| 48h | 4.16E-06  | 2.46E-06 | 2.89E-06 | 3.54E-06 |
| 72h | 6.63E-07  | 1.24E-06 | 1.69E-06 | 1.36E-06 |
|     | cgd6_860  |          |          |          |
| 2h  | 3.68E-05  | 1.40E-04 | 3.12E-05 | 2.79E-05 |
| 6h  | 3.71E-05  | 2.08E-04 | 1.12E-04 | 3.29E-05 |
| 12h | 1.98E-06  | 3.31E-04 | 1.05E-05 | 8.78E-06 |
| 24h | 2.73E-05  | 6.60E-05 | 6.46E-05 | 5.11E-05 |
| 36h | 1.93E-05  | 2.96E-04 | 4.07E-05 | 2.72E-05 |
| 48h | 2.27E-05  | 7.56E-05 | 7.87E-05 | 2.36E-05 |
| 72h | 3.99E-06  | 5.50E-05 | 2.80E-05 | 1.81E-05 |
|     | cgd6_880  |          |          |          |
| 2h  | 0.00E+00  | 0.00E+00 | 0.00E+00 | 4.54E-08 |
| 6h  | 0.00E+00  | 0.00E+00 | 0.00E+00 | 5.68E-08 |
| 12h | 2.08E-05  | 2.91E-04 | 2.66E-05 | 1.46E-05 |
| 24h | 1.32E-05  | 1.48E-04 | 1.85E-05 | 2.12E-05 |
| 36h | 3.02E-05  | 2.60E-04 | 1.75E-04 | 4.81E-05 |
| 48h | 3.85E-04  | 3.28E-04 | 9.57E-04 | 3.97E-04 |
| 72h | 5.09E-05  | 1.44E-04 | 4.94E-04 | 7.69E-05 |
|     | cgd7_1030 |          |          |          |
| 2h  | 3.77E-04  | 2.50E-04 | 3.93E-04 | 2.66E-04 |
| 6h  | 1.32E-04  | 1.86E-04 | 1.37E-04 | 3.74E-05 |
| 12h | 4.23E-05  | 2.66E-04 | 2.08E-04 | 4.18E-05 |
| 24h | 2.34E-04  | 2.30E-04 | 1.99E-04 | 1.03E-04 |
| 36h | 6.03E-05  | 1.72E-04 | 8.77E-05 | 5.01E-05 |
| 48h | 4.25E-05  | 9.59E-05 | 1.35E-04 | 3.53E-05 |
| 72h | 1.93E-05  | 8.34E-05 | 2.47E-04 | 8.01E-05 |
|     | cgd7_1040 |          |          |          |
| 2h  | 2.28E-05  | 1.74E-04 | 7.64E-05 | 2.10E-05 |
| 6h  | 7.19E-07  | 7.59E-05 | 6.53E-07 | 2.26E-07 |
| 12h | 2.64E-05  | 2.36E-04 | 1.74E-05 | 1.26E-05 |
| 24h | 1.78E-05  | 2.66E-05 | 1.10E-05 | 1.63E-05 |
| 36h | 1.31E-05  | 3.24E-05 | 1.94E-05 | 4.90E-05 |
| 48h | 1.63E-05  | 1.93E-05 | 2.74E-05 | 1.30E-05 |
| 72h | 6.47E-06  | 5.91E-05 | 9.22E-05 | 9.48E-07 |
|     | cgd7_1050 |          |          |          |
| 2h  | 4.46E-06  | 1.95E-05 | 1.32E-06 | 4.91E-07 |
| 6h  | 0.00E+00  | 1.61E-05 | 4.12E-09 | 1.85E-07 |
| 12h | 2.06E-06  | 2.11E-05 | 4.88E-06 | 1.79E-06 |
| 24h | 3.92E-06  | 1.05E-05 | 4.54E-07 | 1.11E-06 |
| 36h | 7.55E-07  | 9.46E-06 | 9.94E-07 | 1.61E-06 |
| 48h | 6.41E-07  | 4.99E-06 | 2.69E-06 | 8.19E-07 |
| 72h | 4.54E-07  | 1.51E-06 | 2.72E-06 | 3.63E-07 |
|     | cgd7_1070 |          |          |          |
| 2h  | 6.03E-08  | 4.02E-07 | 6.68E-09 | 1.81E-08 |
| 6h  | 6.70E-08  | 1.29E-06 | 8.11E-08 | 1.52E-07 |
| 12h | 1.32E-09  | 4.65E-08 | 7.69E-08 | 5.81E-09 |
| 24h | 2.71E-08  | 5.11E-08 | 1.21E-07 | 9.05E-08 |
| 36h | 6.24E-08  | 6.04E-07 | 1.30E-07 | 8.26E-08 |
| 48h | 1.19E-07  | 3.21E-07 | 2.16E-07 | 4.28E-08 |
| 72h | 3.13E-08  | 1.66E-07 | 1.16E-07 | 2.69E-08 |
|     | cgd7_1080 |          |          |          |
| 2h  | 1.31E-03  | 1.81E-04 | 2.42E-04 | 6.16E-04 |
| 6h  | 2.88E-04  | 4.40E-04 | 2.84E-04 | 3.54E-04 |

|           |          |          |          |          |
|-----------|----------|----------|----------|----------|
| 12h       | 2.29E-04 | 4.79E-05 | 5.20E-05 | 4.98E-05 |
| 24h       | 2.75E-04 | 1.78E-04 | 1.23E-04 | 1.23E-04 |
| 36h       | 1.71E-04 | 1.58E-04 | 4.86E-05 | 6.96E-04 |
| 48h       | 1.40E-04 | 7.25E-05 | 7.87E-05 | 1.84E-04 |
| 72h       | 1.48E-04 | 5.03E-05 | 1.45E-04 | 8.61E-05 |
| cgd7_1100 |          |          |          |          |
| 2h        | 1.19E-04 | 3.65E-04 | 0.00E+00 | 2.44E-04 |
| 6h        | 1.04E-04 | 6.20E-04 | 9.34E-04 | 3.52E-04 |
| 12h       | 9.18E-05 | 6.07E-04 | 7.52E-04 | 1.40E-04 |
| 24h       | 3.41E-04 | 2.99E-04 | 1.71E-04 | 3.99E-04 |
| 36h       | 2.52E-04 | 3.03E-04 | 3.12E-04 | 4.37E-04 |
| 48h       | 2.68E-04 | 1.16E-04 | 1.53E-04 | 3.73E-04 |
| 72h       | 3.50E-04 | 1.61E-04 | 9.11E-04 | 3.73E-04 |
| cgd7_1120 |          |          |          |          |
| 2h        | 2.54E-06 | 2.92E-06 | 1.69E-06 | 2.90E-07 |
| 6h        | 2.48E-06 | 9.78E-07 | 1.49E-06 | 3.35E-07 |
| 12h       | 5.30E-07 | 1.03E-06 | 7.48E-07 | 2.80E-07 |
| 24h       | 8.29E-07 | 7.64E-07 | 9.15E-07 | 7.75E-07 |
| 36h       | 6.40E-07 | 7.17E-07 | 6.00E-07 | 7.97E-07 |
| 48h       | 3.99E-07 | 6.52E-07 | 1.14E-06 | 8.48E-07 |
| 72h       | 3.24E-07 | 2.67E-07 | 6.40E-07 | 5.01E-07 |
| cgd7_1170 |          |          |          |          |
| 2h        | 1.93E-04 | 9.33E-04 | 6.55E-05 | 3.86E-05 |
| 6h        | 4.16E-05 | 8.34E-04 | 1.53E-04 | 3.39E-05 |
| 12h       | 4.69E-06 | 1.36E-05 | 1.19E-04 | 2.06E-05 |
| 24h       | 4.43E-05 | 1.96E-04 | 1.81E-04 | 6.78E-05 |
| 36h       | 7.37E-05 | 2.93E-04 | 1.60E-04 | 6.62E-05 |
| 48h       | 2.97E-05 | 1.65E-04 | 1.23E-04 | 2.05E-05 |
| 72h       | 2.64E-05 | 7.33E-05 | 1.82E-04 | 1.79E-04 |
| cgd7_1210 |          |          |          |          |
| 2h        | 9.44E-08 | 8.02E-08 | 0.00E+00 | 7.03E-06 |
| 6h        | 9.15E-09 | 0.00E+00 | 0.00E+00 | 0.00E+00 |
| 12h       | 8.10E-06 | 1.17E-05 | 6.44E-05 | 5.76E-05 |
| 24h       | 1.75E-06 | 8.21E-06 | 1.24E-05 | 2.72E-05 |
| 36h       | 5.71E-06 | 8.95E-06 | 1.14E-04 | 1.63E-04 |
| 48h       | 4.32E-06 | 3.25E-06 | 5.07E-05 | 3.84E-05 |
| 72h       | 1.99E-06 | 1.79E-06 | 3.71E-05 | 6.04E-05 |
| cgd7_1310 |          |          |          |          |
| 2h        | 0.00E+00 | 0.00E+00 | 0.00E+00 | 3.32E-08 |
| 6h        | 0.00E+00 | 5.81E-06 | 1.28E-05 | 2.03E-05 |
| 12h       | 1.38E-06 | 7.23E-07 | 5.57E-06 | 4.72E-06 |
| 24h       | 2.41E-06 | 3.07E-06 | 2.77E-05 | 1.98E-05 |
| 36h       | 4.27E-06 | 5.48E-06 | 1.50E-05 | 3.27E-05 |
| 48h       | 6.75E-06 | 3.23E-06 | 1.71E-05 | 1.23E-05 |
| 72h       | 4.63E-06 | 5.07E-07 | 3.18E-06 | 2.01E-06 |
| cgd7_1330 |          |          |          |          |
| 2h        | 4.57E-08 | 0.00E+00 | 0.00E+00 | 0.00E+00 |
| 6h        | 2.97E-05 | 0.00E+00 | 0.00E+00 | 0.00E+00 |
| 12h       | 1.22E-04 | 2.55E-04 | 1.07E-03 | 4.37E-04 |
| 24h       | 3.21E-05 | 3.08E-05 | 8.65E-05 | 1.14E-04 |
| 36h       | 1.32E-05 | 4.93E-05 | 8.10E-04 | 1.84E-04 |
| 48h       | 4.38E-05 | 4.14E-05 | 4.20E-04 | 1.42E-04 |
| 72h       | 5.63E-05 | 6.25E-05 | 2.07E-03 | 5.67E-04 |

|     |           |          |          |          |
|-----|-----------|----------|----------|----------|
|     | cgd7_1340 |          |          |          |
| 2h  | 0.00E+00  | 0.00E+00 | 0.00E+00 | 9.48E-09 |
| 6h  | 3.09E-09  | 2.59E-09 | 0.00E+00 | 0.00E+00 |
| 12h | 2.14E-06  | 3.86E-06 | 3.88E-06 | 1.16E-06 |
| 24h | 2.32E-06  | 1.88E-06 | 3.64E-07 | 3.78E-07 |
| 36h | 1.21E-06  | 2.41E-06 | 3.43E-06 | 1.41E-06 |
| 48h | 8.78E-07  | 3.48E-07 | 8.86E-07 | 2.76E-07 |
| 72h | 1.01E-07  | 9.91E-08 | 1.74E-07 | 9.16E-08 |
|     | cgd7_1360 |          |          |          |
| 2h  | 1.40E-06  | 5.91E-07 | 2.90E-06 | 1.12E-06 |
| 6h  | 2.15E-07  | 4.46E-07 | 1.04E-06 | 8.15E-07 |
| 12h | 1.93E-06  | 1.12E-06 | 9.90E-07 | 1.02E-06 |
| 24h | 2.01E-07  | 4.94E-07 | 1.47E-06 | 6.14E-07 |
| 36h | 6.44E-07  | 7.01E-07 | 7.05E-07 | 1.04E-06 |
| 48h | 3.02E-07  | 9.73E-08 | 9.82E-07 | 1.47E-06 |
| 72h | 2.36E-07  | 2.43E-07 | 6.98E-07 | 6.07E-07 |
|     | cgd7_150  |          |          |          |
| 2h  | 4.98E-08  | 0.00E+00 | 0.00E+00 | 0.00E+00 |
| 6h  | 0.00E+00  | 0.00E+00 | 0.00E+00 | 0.00E+00 |
| 12h | 9.39E-09  | 8.51E-08 | 0.00E+00 | 0.00E+00 |
| 24h | 2.77E-09  | 3.11E-09 | 3.40E-08 | 3.22E-06 |
| 36h | 1.12E-08  | 2.97E-08 | 3.65E-08 | 8.15E-08 |
| 48h | 7.79E-08  | 2.02E-08 | 1.19E-06 | 5.18E-07 |
| 72h | 5.43E-08  | 4.39E-08 | 4.05E-07 | 3.06E-06 |
|     | cgd7_1520 |          |          |          |
| 2h  | 8.65E-08  | 2.29E-07 | 8.46E-08 | 3.81E-07 |
| 6h  | 2.46E-07  | 3.39E-07 | 1.16E-06 | 2.90E-06 |
| 12h | 1.72E-07  | 2.78E-07 | 5.21E-07 | 1.53E-06 |
| 24h | 3.34E-07  | 5.21E-07 | 6.23E-07 | 7.49E-07 |
| 36h | 1.65E-07  | 5.29E-07 | 1.02E-06 | 1.43E-06 |
| 48h | 1.95E-07  | 1.69E-07 | 7.89E-07 | 9.12E-07 |
| 72h | 2.21E-07  | 1.11E-07 | 5.14E-07 | 6.17E-07 |
|     | cgd7_1530 |          |          |          |
| 2h  | 1.47E-04  | 2.03E-04 | 4.16E-04 | 1.86E-03 |
| 6h  | 1.67E-05  | 4.51E-05 | 6.79E-05 | 1.64E-04 |
| 12h | 4.43E-05  | 7.15E-05 | 2.98E-04 | 4.38E-04 |
| 24h | 9.79E-05  | 3.17E-04 | 1.55E-04 | 2.49E-04 |
| 36h | 1.40E-05  | 4.55E-05 | 1.16E-04 | 1.43E-04 |
| 48h | 1.52E-05  | 2.90E-05 | 8.40E-05 | 1.47E-04 |
| 72h | 6.93E-06  | 5.82E-06 | 1.00E-04 | 6.24E-05 |
|     | cgd7_1560 |          |          |          |
| 2h  | 1.45E-06  | 7.95E-07 | 2.45E-07 | 1.50E-06 |
| 6h  | 1.87E-08  | 3.68E-08 | 2.53E-08 | 4.09E-07 |
| 12h | 3.61E-08  | 1.14E-08 | 1.06E-07 | 2.05E-07 |
| 24h | 4.24E-07  | 1.86E-06 | 7.08E-07 | 6.05E-07 |
| 36h | 4.80E-07  | 9.43E-07 | 9.69E-07 | 6.37E-07 |
| 48h | 7.59E-07  | 1.03E-06 | 1.56E-06 | 4.69E-06 |
| 72h | 8.42E-07  | 3.95E-07 | 2.18E-06 | 9.88E-07 |
|     | cgd7_1570 |          |          |          |
| 2h  | 3.24E-06  | 5.01E-07 | 2.63E-06 | 2.84E-05 |
| 6h  | 7.70E-07  | 5.75E-07 | 2.04E-06 | 7.74E-06 |
| 12h | 7.64E-08  | 2.93E-09 | 9.20E-07 | 8.59E-07 |
| 24h | 9.35E-07  | 1.89E-06 | 2.22E-06 | 2.87E-06 |

|     |           |          |          |          |
|-----|-----------|----------|----------|----------|
| 36h | 1.25E-06  | 3.04E-06 | 4.78E-06 | 4.02E-06 |
| 48h | 2.41E-06  | 3.01E-06 | 1.08E-05 | 1.60E-05 |
| 72h | 2.35E-06  | 1.61E-06 | 1.62E-05 | 8.43E-06 |
|     | cgd7_1600 |          |          |          |
| 2h  | 1.01E-06  | 1.31E-06 | 1.92E-06 | 2.23E-06 |
| 6h  | 1.76E-07  | 2.68E-07 | 3.64E-08 | 4.70E-07 |
| 12h | 3.64E-07  | 7.16E-07 | 3.50E-07 | 6.32E-07 |
| 24h | 5.57E-07  | 1.03E-06 | 6.97E-07 | 4.64E-07 |
| 36h | 4.73E-07  | 6.40E-07 | 5.63E-07 | 4.13E-07 |
| 48h | 2.75E-07  | 2.89E-07 | 7.84E-07 | 6.07E-07 |
| 72h | 1.21E-07  | 1.62E-07 | 5.72E-07 | 3.95E-07 |
|     | cgd7_1620 |          |          |          |
| 2h  | 3.11E-05  | 7.15E-04 | 3.24E-04 | 2.25E-04 |
| 6h  | 1.45E-05  | 1.95E-04 | 9.66E-05 | 1.08E-04 |
| 12h | 9.50E-05  | 2.13E-03 | 3.48E-04 | 4.68E-04 |
| 24h | 4.10E-05  | 1.33E-03 | 1.74E-04 | 2.00E-04 |
| 36h | 1.68E-05  | 2.86E-04 | 1.77E-04 | 3.15E-04 |
| 48h | 1.74E-05  | 2.25E-04 | 3.32E-04 | 1.14E-04 |
| 72h | 2.14E-05  | 2.76E-04 | 2.77E-04 | 4.95E-05 |
|     | cgd7_1660 |          |          |          |
| 2h  | 2.40E-08  | 0.00E+00 | 0.00E+00 | 3.58E-09 |
| 6h  | 8.29E-09  | 1.38E-08 | 7.13E-09 | 8.36E-09 |
| 12h | 2.86E-06  | 4.27E-06 | 3.57E-06 | 1.25E-06 |
| 24h | 9.20E-07  | 6.28E-07 | 4.59E-07 | 4.24E-07 |
| 36h | 1.50E-07  | 3.89E-07 | 1.24E-06 | 7.50E-07 |
| 48h | 3.52E-07  | 3.99E-07 | 5.07E-07 | 3.69E-07 |
| 72h | 1.60E-07  | 2.81E-07 | 5.73E-07 | 3.04E-07 |
|     | cgd7_170  |          |          |          |
| 2h  | 1.96E-05  | 1.82E-04 | 2.51E-05 | 4.06E-05 |
| 6h  | 2.38E-05  | 5.21E-05 | 1.58E-05 | 1.66E-05 |
| 12h | 1.81E-05  | 1.51E-04 | 1.68E-04 | 1.17E-05 |
| 24h | 9.29E-06  | 1.32E-04 | 1.03E-04 | 3.41E-05 |
| 36h | 3.09E-06  | 7.50E-05 | 1.02E-04 | 2.22E-05 |
| 48h | 5.28E-06  | 4.53E-05 | 8.81E-05 | 1.38E-05 |
| 72h | 1.17E-05  | 1.05E-04 | 4.73E-04 | 1.90E-05 |
|     | cgd7_1740 |          |          |          |
| 2h  | 1.26E-04  | 2.40E-05 | 1.96E-07 | 8.87E-05 |
| 6h  | 1.85E-05  | 2.00E-06 | 3.88E-07 | 4.97E-06 |
| 12h | 8.18E-06  | 6.46E-07 | 7.82E-07 | 7.40E-06 |
| 24h | 1.07E-05  | 6.80E-06 | 1.05E-06 | 1.36E-05 |
| 36h | 1.16E-05  | 4.04E-06 | 8.96E-07 | 7.80E-06 |
| 48h | 6.42E-06  | 6.55E-07 | 2.00E-07 | 6.76E-06 |
| 72h | 1.26E-06  | 5.46E-07 | 1.67E-07 | 2.08E-06 |
|     | cgd7_1870 |          |          |          |
| 2h  | 0.00E+00  | 0.00E+00 | 0.00E+00 | 0.00E+00 |
| 6h  | 0.00E+00  | 1.31E-08 | 0.00E+00 | 0.00E+00 |
| 12h | 0.00E+00  | 0.00E+00 | 0.00E+00 | 0.00E+00 |
| 24h | 0.00E+00  | 4.65E-10 | 1.64E-10 | 3.74E-09 |
| 36h | 1.58E-08  | 1.68E-08 | 4.05E-09 | 3.35E-08 |
| 48h | 4.20E-08  | 9.95E-09 | 1.07E-08 | 3.79E-08 |
| 72h | 4.88E-09  | 1.60E-08 | 7.23E-08 | 9.74E-08 |
|     | cgd7_190  |          |          |          |
| 2h  | 0.00E+00  | 0.00E+00 | 0.00E+00 | 0.00E+00 |

|     |           |          |          |          |
|-----|-----------|----------|----------|----------|
| 6h  | 4.13E-08  | 1.00E-08 | 0.00E+00 | 1.22E-08 |
| 12h | 5.24E-08  | 9.54E-09 | 1.19E-08 | 1.29E-08 |
| 24h | 1.17E-08  | 2.50E-08 | 1.17E-08 | 8.64E-08 |
| 36h | 8.42E-08  | 3.73E-08 | 2.95E-08 | 2.77E-07 |
| 48h | 1.18E-07  | 4.92E-08 | 2.36E-08 | 1.36E-07 |
| 72h | 2.07E-07  | 8.30E-08 | 2.27E-07 | 9.69E-08 |
|     | cgd7_20   |          |          |          |
| 2h  | 1.49E-05  | 1.18E-06 | 2.42E-06 | 1.92E-06 |
| 6h  | 5.95E-07  | 2.17E-07 | 2.67E-07 | 8.26E-07 |
| 12h | 1.55E-06  | 4.61E-07 | 1.08E-06 | 1.69E-06 |
| 24h | 1.57E-06  | 1.81E-06 | 3.69E-07 | 9.35E-07 |
| 36h | 6.47E-07  | 4.36E-07 | 6.93E-07 | 2.52E-06 |
| 48h | 9.24E-07  | 4.92E-07 | 2.94E-07 | 6.47E-07 |
| 72h | 2.47E-07  | 1.69E-07 | 3.50E-08 | 2.19E-08 |
|     | cgd7_2060 |          |          |          |
| 2h  | 4.44E-06  | 0.00E+00 | 0.00E+00 | 0.00E+00 |
| 6h  | 2.26E-05  | 3.67E-04 | 2.72E-03 | 1.17E-04 |
| 12h | 3.17E-06  | 2.53E-04 | 3.85E-04 | 2.36E-06 |
| 24h | 4.61E-06  | 2.06E-04 | 1.35E-03 | 5.28E-05 |
| 36h | 1.67E-05  | 2.81E-04 | 1.82E-03 | 1.56E-04 |
| 48h | 1.64E-05  | 7.96E-05 | 3.53E-04 | 5.07E-05 |
| 72h | 3.02E-06  | 5.27E-05 | 6.88E-04 | 1.62E-05 |
|     | cgd7_2150 |          |          |          |
| 2h  | 0.00E+00  | 0.00E+00 | 0.00E+00 | 0.00E+00 |
| 6h  | 1.20E-06  | 3.65E-05 | 1.48E-04 | 2.50E-06 |
| 12h | 1.78E-06  | 1.78E-05 | 5.62E-05 | 6.13E-07 |
| 24h | 1.79E-07  | 2.47E-05 | 1.17E-04 | 2.72E-06 |
| 36h | 1.37E-06  | 4.05E-05 | 4.56E-05 | 5.96E-06 |
| 48h | 2.51E-06  | 1.77E-05 | 6.77E-05 | 2.44E-06 |
| 72h | 6.22E-07  | 1.88E-05 | 8.35E-04 | 3.04E-06 |
|     | cgd7_2180 |          |          |          |
| 2h  | 4.17E-05  | 3.92E-06 | 1.41E-07 | 1.52E-05 |
| 6h  | 3.32E-05  | 4.51E-07 | 5.30E-08 | 4.70E-06 |
| 12h | 8.90E-06  | 0.00E+00 | 3.73E-07 | 1.89E-06 |
| 24h | 1.54E-05  | 1.02E-06 | 1.35E-07 | 3.00E-06 |
| 36h | 5.87E-06  | 9.95E-07 | 1.75E-07 | 2.71E-06 |
| 48h | 2.04E-05  | 6.65E-07 | 4.33E-07 | 4.91E-06 |
| 72h | 1.53E-05  | 8.28E-07 | 4.85E-07 | 1.81E-06 |
|     | cgd7_220  |          |          |          |
| 2h  | 1.36E-03  | 8.04E-05 | 1.58E-05 | 2.60E-04 |
| 6h  | 7.89E-04  | 1.37E-04 | 7.61E-05 | 1.33E-04 |
| 12h | 6.55E-04  | 3.31E-05 | 1.63E-05 | 8.95E-05 |
| 24h | 1.63E-04  | 3.31E-05 | 4.27E-05 | 9.51E-05 |
| 36h | 6.58E-04  | 3.05E-05 | 2.12E-05 | 6.16E-05 |
| 48h | 1.44E-04  | 1.45E-05 | 1.47E-05 | 5.28E-05 |
| 72h | 7.63E-05  | 1.10E-05 | 7.56E-06 | 6.71E-06 |
|     | cgd7_2220 |          |          |          |
| 2h  | 1.82E-06  | 2.24E-05 | 0.00E+00 | 4.59E-05 |
| 6h  | 0.00E+00  | 9.14E-06 | 0.00E+00 | 0.00E+00 |
| 12h | 1.78E-05  | 3.03E-04 | 5.24E-04 | 4.54E-05 |
| 24h | 4.46E-06  | 1.98E-04 | 2.22E-04 | 5.59E-05 |
| 36h | 7.57E-06  | 1.69E-04 | 3.59E-03 | 1.84E-04 |
| 48h | 3.88E-06  | 9.82E-05 | 7.40E-05 | 1.65E-05 |

|     |           |          |          |          |
|-----|-----------|----------|----------|----------|
| 72h | 2.90E-06  | 5.62E-05 | 6.25E-04 | 1.64E-05 |
|     | cgd7_2230 |          |          |          |
| 2h  | 3.34E-05  | 0.00E+00 | 0.00E+00 | 0.00E+00 |
| 6h  | 0.00E+00  | 3.57E-07 | 0.00E+00 | 6.20E-07 |
| 12h | 7.81E-05  | 6.29E-06 | 4.77E-05 | 1.91E-05 |
| 24h | 1.16E-05  | 1.51E-05 | 4.93E-05 | 7.09E-06 |
| 36h | 4.60E-05  | 7.82E-05 | 1.72E-04 | 5.75E-05 |
| 48h | 8.82E-05  | 3.77E-05 | 1.11E-04 | 2.52E-05 |
| 72h | 4.37E-05  | 2.01E-05 | 1.33E-04 | 5.28E-05 |
|     | cgd7_2240 |          |          |          |
| 2h  | 1.06E-04  | 9.23E-06 | 2.24E-05 | 3.53E-06 |
| 6h  | 1.77E-05  | 4.89E-06 | 7.48E-06 | 1.33E-06 |
| 12h | 4.56E-05  | 7.24E-06 | 3.85E-05 | 3.03E-06 |
| 24h | 4.78E-05  | 1.64E-05 | 1.23E-05 | 4.15E-06 |
| 36h | 1.07E-05  | 4.01E-06 | 8.09E-06 | 3.23E-06 |
| 48h | 1.25E-05  | 2.31E-06 | 7.23E-06 | 5.34E-06 |
| 72h | 3.39E-06  | 8.54E-07 | 6.16E-06 | 4.86E-07 |
|     | cgd7_2250 |          |          |          |
| 2h  | 2.28E-03  | 2.54E-02 | 2.50E-03 | 2.04E-02 |
| 6h  | 7.84E-03  | 2.34E-02 | 1.87E-02 | 8.20E-02 |
| 12h | 9.11E-04  | 1.15E-02 | 2.58E-03 | 1.03E-02 |
| 24h | 1.11E-03  | 1.44E-02 | 2.79E-03 | 5.34E-03 |
| 36h | 1.55E-03  | 5.92E-03 | 1.32E-03 | 1.20E-02 |
| 48h | 6.09E-04  | 3.53E-03 | 9.10E-04 | 1.12E-02 |
| 72h | 1.78E-04  | 9.70E-04 | 4.70E-04 | 1.48E-03 |
|     | cgd7_2350 |          |          |          |
| 2h  | 4.90E-08  | 1.46E-08 | 0.00E+00 | 0.00E+00 |
| 6h  | 1.35E-08  | 4.79E-09 | 8.71E-09 | 2.11E-08 |
| 12h | 3.73E-07  | 7.37E-07 | 2.44E-07 | 6.51E-09 |
| 24h | 1.01E-07  | 3.38E-08 | 1.55E-07 | 2.81E-08 |
| 36h | 6.38E-07  | 1.51E-07 | 9.33E-07 | 2.85E-07 |
| 48h | 1.25E-06  | 1.06E-07 | 5.08E-07 | 1.28E-07 |
| 72h | 2.74E-07  | 2.56E-07 | 1.23E-06 | 3.71E-08 |
|     | cgd7_2390 |          |          |          |
| 2h  | 6.30E-07  | 3.88E-07 | 2.31E-07 | 7.85E-08 |
| 6h  | 3.00E-06  | 3.89E-07 | 8.38E-07 | 4.78E-07 |
| 12h | 4.96E-07  | 6.37E-08 | 5.69E-07 | 1.35E-07 |
| 24h | 7.33E-07  | 4.00E-07 | 6.94E-07 | 4.34E-07 |
| 36h | 6.34E-07  | 4.56E-07 | 5.31E-07 | 4.79E-07 |
| 48h | 7.12E-07  | 2.42E-07 | 4.23E-07 | 2.79E-07 |
| 72h | 1.89E-07  | 1.54E-07 | 7.00E-07 | 1.26E-07 |
|     | cgd7_2420 |          |          |          |
| 2h  | 2.00E-03  | 7.52E-03 | 2.28E-03 | 1.94E-03 |
| 6h  | 3.04E-03  | 9.94E-03 | 1.91E-03 | 4.97E-03 |
| 12h | 7.59E-04  | 1.07E-03 | 1.18E-03 | 1.45E-03 |
| 24h | 1.83E-03  | 6.90E-03 | 1.78E-03 | 2.83E-03 |
| 36h | 2.38E-04  | 6.18E-03 | 5.74E-04 | 1.52E-03 |
| 48h | 2.72E-04  | 1.94E-03 | 6.28E-04 | 1.79E-03 |
| 72h | 1.82E-04  | 4.81E-04 | 4.04E-04 | 3.36E-04 |
|     | cgd7_2630 |          |          |          |
| 2h  | 7.24E-07  | 6.02E-07 | 2.09E-07 | 1.28E-07 |
| 6h  | 1.84E-07  | 2.25E-07 | 5.49E-07 | 1.83E-07 |
| 12h | 7.61E-08  | 6.21E-08 | 3.34E-07 | 4.92E-08 |

|           |          |          |          |          |
|-----------|----------|----------|----------|----------|
| 24h       | 2.59E-07 | 3.64E-07 | 8.09E-07 | 3.92E-07 |
| 36h       | 4.28E-07 | 4.63E-07 | 3.67E-07 | 2.27E-07 |
| 48h       | 2.61E-07 | 1.90E-07 | 5.67E-07 | 2.44E-07 |
| 72h       | 1.06E-07 | 8.32E-08 | 9.83E-08 | 5.32E-08 |
| cgd7_2730 |          |          |          |          |
| 2h        | 1.38E-06 | 1.33E-06 | 2.04E-07 | 5.58E-07 |
| 6h        | 4.29E-07 | 4.01E-07 | 1.13E-06 | 8.95E-07 |
| 12h       | 7.21E-07 | 1.83E-07 | 2.69E-06 | 3.92E-07 |
| 24h       | 1.36E-06 | 9.21E-07 | 1.54E-06 | 8.21E-07 |
| 36h       | 5.24E-07 | 1.03E-06 | 1.01E-06 | 6.43E-07 |
| 48h       | 5.83E-07 | 3.91E-07 | 9.05E-07 | 5.39E-07 |
| 72h       | 5.24E-07 | 1.56E-07 | 4.01E-07 | 2.08E-07 |
| cgd7_2800 |          |          |          |          |
| 2h        | 5.03E-08 | 1.20E-07 | 9.21E-08 | 2.44E-08 |
| 6h        | 3.01E-07 | 1.15E-07 | 7.16E-07 | 1.04E-07 |
| 12h       | 2.21E-07 | 6.28E-09 | 4.70E-08 | 4.59E-09 |
| 24h       | 9.53E-08 | 1.59E-07 | 4.33E-07 | 1.61E-07 |
| 36h       | 3.14E-07 | 1.27E-07 | 1.42E-07 | 1.29E-07 |
| 48h       | 7.55E-07 | 5.49E-07 | 1.15E-06 | 4.34E-07 |
| 72h       | 5.62E-07 | 1.32E-07 | 1.85E-07 | 1.71E-07 |
| cgd7_2810 |          |          |          |          |
| 2h        | 1.62E-05 | 1.59E-06 | 1.17E-05 | 9.25E-07 |
| 6h        | 2.62E-05 | 4.76E-06 | 2.68E-05 | 8.01E-06 |
| 12h       | 3.95E-06 | 1.07E-06 | 1.54E-06 | 2.19E-07 |
| 24h       | 6.64E-06 | 6.65E-06 | 3.32E-05 | 3.31E-06 |
| 36h       | 3.50E-05 | 5.61E-06 | 2.66E-05 | 2.89E-06 |
| 48h       | 3.74E-05 | 3.38E-06 | 4.53E-05 | 1.54E-05 |
| 72h       | 3.88E-06 | 4.97E-07 | 1.59E-06 | 9.40E-07 |
| cgd7_2890 |          |          |          |          |
| 2h        | 6.30E-04 | 3.60E-03 | 6.95E-04 | 1.53E-03 |
| 6h        | 1.24E-03 | 5.90E-03 | 1.49E-03 | 8.79E-03 |
| 12h       | 2.66E-04 | 1.80E-03 | 3.76E-04 | 1.30E-03 |
| 24h       | 3.25E-04 | 2.36E-03 | 1.08E-03 | 2.79E-03 |
| 36h       | 1.88E-04 | 9.88E-04 | 7.36E-04 | 2.55E-03 |
| 48h       | 3.86E-04 | 4.54E-04 | 5.02E-04 | 2.69E-04 |
| 72h       | 7.73E-05 | 2.54E-04 | 2.25E-04 | 2.09E-04 |
| cgd7_2940 |          |          |          |          |
| 2h        | 3.82E-06 | 3.78E-06 | 1.65E-06 | 2.40E-06 |
| 6h        | 4.03E-05 | 6.71E-05 | 9.51E-05 | 2.14E-05 |
| 12h       | 7.63E-06 | 3.38E-05 | 4.15E-06 | 5.90E-06 |
| 24h       | 1.62E-05 | 2.21E-05 | 4.64E-05 | 1.20E-05 |
| 36h       | 5.83E-05 | 4.63E-05 | 2.87E-05 | 2.16E-05 |
| 48h       | 3.21E-05 | 1.17E-05 | 4.73E-05 | 5.70E-06 |
| 72h       | 7.47E-06 | 3.70E-06 | 7.96E-06 | 1.38E-06 |
| cgd7_3020 |          |          |          |          |
| 2h        | 1.21E-05 | 4.68E-06 | 3.78E-06 | 1.34E-05 |
| 6h        | 4.42E-06 | 9.31E-06 | 2.46E-06 | 5.14E-06 |
| 12h       | 3.84E-06 | 2.22E-06 | 3.90E-06 | 1.57E-06 |
| 24h       | 4.09E-06 | 5.51E-06 | 2.91E-06 | 3.41E-06 |
| 36h       | 4.98E-06 | 3.41E-06 | 5.88E-06 | 5.45E-06 |
| 48h       | 1.28E-05 | 4.30E-06 | 5.06E-06 | 2.51E-06 |
| 72h       | 1.65E-06 | 2.06E-06 | 3.17E-06 | 1.98E-06 |
| cgd7_310  |          |          |          |          |

|     |           |          |          |          |
|-----|-----------|----------|----------|----------|
| 2h  | 5.01E-05  | 1.17E-05 | 7.18E-05 | 6.20E-05 |
| 6h  | 2.20E-04  | 1.53E-05 | 4.89E-05 | 1.88E-05 |
| 12h | 4.71E-05  | 4.14E-06 | 1.88E-05 | 1.20E-06 |
| 24h | 4.87E-05  | 8.61E-06 | 2.33E-05 | 7.91E-06 |
| 36h | 8.73E-05  | 1.26E-05 | 2.42E-05 | 1.40E-05 |
| 48h | 6.60E-04  | 3.79E-05 | 1.45E-04 | 6.48E-05 |
| 72h | 6.85E-04  | 1.33E-04 | 2.68E-04 | 5.00E-05 |
|     | cgd7_3150 |          |          |          |
| 2h  | 0.00E+00  | 3.71E-05 | 0.00E+00 | 0.00E+00 |
| 6h  | 0.00E+00  | 0.00E+00 | 0.00E+00 | 1.11E-05 |
| 12h | 7.13E-07  | 6.96E-06 | 3.77E-05 | 7.30E-07 |
| 24h | 5.08E-07  | 3.22E-05 | 6.95E-05 | 1.44E-05 |
| 36h | 6.10E-06  | 1.01E-04 | 9.56E-05 | 1.05E-04 |
| 48h | 2.07E-05  | 4.41E-05 | 1.45E-04 | 5.24E-05 |
| 72h | 9.51E-06  | 1.19E-04 | 1.48E-04 | 7.41E-05 |
|     | cgd7_3210 |          |          |          |
| 2h  | 6.97E-06  | 3.12E-05 | 0.00E+00 | 8.52E-05 |
| 6h  | 0.00E+00  | 3.58E-05 | 1.96E-05 | 1.21E-05 |
| 12h | 1.37E-02  | 9.11E-03 | 1.62E-03 | 1.05E-03 |
| 24h | 9.26E-04  | 4.92E-04 | 6.28E-04 | 2.73E-04 |
| 36h | 9.23E-04  | 6.21E-04 | 1.94E-03 | 1.32E-03 |
| 48h | 5.11E-04  | 2.09E-04 | 8.31E-04 | 3.48E-04 |
| 72h | 7.94E-05  | 1.15E-04 | 3.36E-04 | 9.15E-05 |
|     | cgd7_3240 |          |          |          |
| 2h  | 5.80E-06  | 1.06E-04 | 2.45E-05 | 2.67E-04 |
| 6h  | 1.05E-05  | 1.42E-04 | 5.00E-05 | 1.68E-04 |
| 12h | 1.75E-06  | 8.81E-06 | 1.57E-05 | 3.43E-05 |
| 24h | 5.26E-06  | 2.07E-05 | 2.60E-05 | 5.54E-05 |
| 36h | 3.37E-06  | 1.85E-05 | 1.61E-05 | 2.40E-05 |
| 48h | 9.52E-06  | 7.74E-06 | 1.51E-05 | 2.19E-05 |
| 72h | 1.47E-06  | 1.24E-05 | 1.78E-05 | 1.59E-05 |
|     | cgd7_3260 |          |          |          |
| 2h  | 9.86E-07  | 1.11E-04 | 2.09E-05 | 6.75E-06 |
| 6h  | 2.73E-06  | 2.98E-04 | 1.44E-04 | 2.18E-04 |
| 12h | 3.78E-07  | 7.10E-06 | 5.87E-06 | 5.06E-06 |
| 24h | 6.93E-07  | 1.32E-05 | 3.93E-05 | 6.94E-05 |
| 36h | 4.56E-06  | 2.04E-05 | 2.10E-05 | 5.21E-05 |
| 48h | 2.27E-06  | 3.03E-05 | 2.86E-05 | 7.31E-05 |
| 72h | 6.53E-07  | 4.45E-06 | 5.93E-06 | 4.27E-06 |
|     | cgd7_3300 |          |          |          |
| 2h  | 5.81E-03  | 2.15E-03 | 4.01E-03 | 5.78E-04 |
| 6h  | 2.88E-03  | 1.48E-03 | 1.05E-03 | 1.52E-04 |
| 12h | 3.37E-03  | 1.87E-03 | 1.27E-03 | 3.74E-04 |
| 24h | 1.87E-03  | 6.61E-04 | 5.08E-04 | 6.09E-04 |
| 36h | 1.78E-03  | 6.64E-04 | 4.63E-04 | 3.31E-04 |
| 48h | 1.99E-03  | 4.91E-04 | 1.05E-03 | 1.31E-04 |
| 72h | 3.34E-04  | 4.15E-04 | 5.43E-04 | 6.59E-05 |
|     | cgd7_3310 |          |          |          |
| 2h  | 3.84E-06  | 1.99E-06 | 5.65E-06 | 1.17E-05 |
| 6h  | 2.73E-06  | 4.20E-06 | 1.50E-06 | 3.89E-06 |
| 12h | 2.54E-06  | 2.91E-06 | 3.82E-06 | 2.64E-06 |
| 24h | 3.15E-06  | 1.56E-06 | 1.69E-06 | 9.75E-07 |
| 36h | 9.24E-07  | 9.74E-07 | 1.77E-06 | 1.41E-06 |



|     |           |          |          |          |
|-----|-----------|----------|----------|----------|
| 48h | 1.32E-06  | 5.91E-07 | 8.84E-07 | 6.68E-07 |
| 72h | 4.94E-07  | 4.49E-07 | 3.99E-07 | 5.05E-07 |
|     | cgd7_3330 |          |          |          |
| 2h  | 1.71E-07  | 0.00E+00 | 0.00E+00 | 0.00E+00 |
| 6h  | 0.00E+00  | 4.12E-08 | 0.00E+00 | 0.00E+00 |
| 12h | 1.07E-05  | 1.17E-05 | 5.57E-06 | 5.16E-06 |
| 24h | 1.34E-06  | 3.60E-06 | 6.94E-07 | 9.39E-07 |
| 36h | 1.22E-06  | 1.73E-06 | 6.53E-06 | 3.33E-06 |
| 48h | 1.11E-06  | 6.98E-07 | 9.79E-07 | 1.81E-06 |
| 72h | 6.20E-07  | 7.84E-07 | 1.14E-06 | 1.97E-07 |
|     | cgd7_3430 |          |          |          |
| 2h  | 3.53E-05  | 7.86E-05 | 7.92E-05 | 2.35E-04 |
| 6h  | 2.65E-06  | 2.87E-05 | 1.57E-06 | 4.77E-05 |
| 12h | 1.96E-05  | 1.09E-04 | 4.17E-05 | 8.49E-05 |
| 24h | 1.78E-05  | 4.41E-05 | 3.43E-05 | 2.99E-05 |
| 36h | 9.61E-06  | 6.05E-05 | 4.28E-05 | 5.64E-05 |
| 48h | 3.69E-05  | 5.05E-05 | 4.89E-05 | 7.94E-05 |
| 72h | 1.05E-05  | 1.51E-05 | 1.87E-05 | 3.08E-05 |
|     | cgd7_3500 |          |          |          |
| 2h  | 5.25E-05  | 3.53E-04 | 2.37E-04 | 2.58E-04 |
| 6h  | 1.76E-05  | 1.80E-04 | 1.02E-04 | 6.31E-04 |
| 12h | 2.62E-05  | 2.00E-05 | 7.60E-05 | 1.39E-04 |
| 24h | 2.28E-05  | 1.01E-04 | 1.12E-04 | 1.79E-04 |
| 36h | 2.84E-05  | 1.72E-04 | 5.18E-05 | 1.05E-04 |
| 48h | 3.49E-05  | 1.21E-04 | 9.87E-05 | 1.69E-04 |
| 72h | 1.48E-05  | 3.85E-05 | 3.04E-05 | 3.63E-05 |
|     | cgd7_3550 |          |          |          |
| 2h  | 6.60E-04  | 1.80E-03 | 9.19E-04 | 4.65E-03 |
| 6h  | 1.22E-04  | 2.86E-04 | 1.31E-04 | 3.78E-04 |
| 12h | 1.83E-04  | 1.84E-04 | 2.54E-04 | 7.44E-04 |
| 24h | 2.89E-04  | 6.94E-04 | 2.26E-04 | 6.07E-04 |
| 36h | 7.82E-05  | 2.02E-04 | 1.39E-04 | 2.90E-04 |
| 48h | 2.45E-04  | 2.51E-04 | 3.48E-04 | 2.66E-04 |
| 72h | 2.67E-05  | 9.81E-05 | 1.36E-04 | 7.79E-05 |
|     | cgd7_3570 |          |          |          |
| 2h  | 6.55E-05  | 7.90E-06 | 5.30E-06 | 2.55E-04 |
| 6h  | 8.00E-05  | 1.16E-05 | 8.78E-06 | 7.94E-05 |
| 12h | 1.55E-05  | 9.97E-06 | 3.58E-06 | 1.84E-05 |
| 24h | 4.42E-05  | 7.76E-06 | 1.26E-05 | 2.25E-04 |
| 36h | 6.79E-05  | 1.96E-05 | 7.68E-06 | 2.03E-04 |
| 48h | 8.70E-05  | 1.28E-05 | 2.87E-05 | 1.53E-04 |
| 72h | 1.54E-04  | 5.71E-06 | 3.94E-06 | 2.50E-05 |
|     | cgd7_3610 |          |          |          |
| 2h  | 9.41E-07  | 5.75E-07 | 6.58E-07 | 1.89E-06 |
| 6h  | 1.68E-06  | 1.64E-06 | 1.84E-06 | 8.33E-06 |
| 12h | 1.63E-07  | 9.72E-08 | 5.61E-07 | 6.05E-07 |
| 24h | 1.30E-06  | 6.59E-07 | 1.42E-06 | 4.20E-06 |
| 36h | 1.97E-06  | 9.48E-07 | 4.10E-07 | 1.44E-06 |
| 48h | 7.08E-07  | 2.03E-07 | 3.23E-07 | 1.12E-06 |
| 72h | 2.03E-07  | 1.11E-07 | 5.38E-08 | 3.06E-07 |
|     | cgd7_3690 |          |          |          |
| 2h  | 1.34E-06  | 0.00E+00 | 0.00E+00 | 0.00E+00 |
| 6h  | 2.40E-07  | 3.09E-08 | 2.64E-08 | 3.12E-07 |

|           |          |          |          |          |
|-----------|----------|----------|----------|----------|
| 12h       | 0.00E+00 | 2.27E-08 | 2.29E-08 | 3.64E-07 |
| 24h       | 1.68E-08 | 6.12E-09 | 1.25E-08 | 1.36E-07 |
| 36h       | 2.60E-08 | 2.75E-08 | 2.19E-08 | 1.30E-07 |
| 48h       | 7.70E-08 | 1.98E-08 | 3.71E-08 | 1.19E-07 |
| 72h       | 8.35E-08 | 2.31E-08 | 5.35E-08 | 5.48E-07 |
| cgd7_3720 |          |          |          |          |
| 2h        | 6.93E-04 | 4.91E-05 | 4.77E-06 | 2.11E-04 |
| 6h        | 9.19E-04 | 7.90E-05 | 1.29E-05 | 5.25E-04 |
| 12h       | 1.93E-05 | 5.37E-07 | 2.27E-05 | 5.64E-05 |
| 24h       | 1.50E-04 | 3.88E-05 | 3.85E-05 | 3.57E-04 |
| 36h       | 2.68E-04 | 4.51E-05 | 1.07E-05 | 1.10E-04 |
| 48h       | 2.66E-04 | 2.35E-05 | 2.84E-05 | 1.06E-04 |
| 72h       | 8.98E-05 | 2.38E-05 | 7.02E-06 | 6.66E-05 |
| cgd7_3740 |          |          |          |          |
| 2h        | 8.78E-08 | 1.52E-08 | 4.84E-08 | 1.03E-07 |
| 6h        | 4.68E-07 | 2.75E-07 | 8.88E-08 | 1.02E-06 |
| 12h       | 1.16E-08 | 1.03E-08 | 1.21E-08 | 3.18E-08 |
| 24h       | 1.08E-07 | 3.77E-08 | 1.58E-07 | 5.40E-07 |
| 36h       | 1.67E-07 | 1.78E-07 | 1.05E-07 | 5.51E-07 |
| 48h       | 1.70E-07 | 3.51E-08 | 1.26E-07 | 7.81E-08 |
| 72h       | 3.98E-08 | 7.74E-08 | 1.68E-08 | 5.86E-08 |
| cgd7_390  |          |          |          |          |
| 2h        | 2.48E-06 | 6.08E-07 | 1.64E-08 | 9.53E-06 |
| 6h        | 1.69E-05 | 3.24E-06 | 2.30E-06 | 1.88E-04 |
| 12h       | 1.46E-05 | 4.65E-06 | 4.47E-07 | 6.88E-05 |
| 24h       | 1.25E-05 | 4.63E-06 | 2.25E-06 | 1.03E-04 |
| 36h       | 2.64E-05 | 5.59E-06 | 1.90E-06 | 8.97E-05 |
| 48h       | 4.65E-05 | 9.99E-06 | 1.98E-06 | 1.15E-04 |
| 72h       | 4.46E-05 | 6.08E-06 | 4.57E-06 | 6.06E-05 |
| cgd7_4000 |          |          |          |          |
| 2h        | 0.00E+00 | 0.00E+00 | 0.00E+00 | 0.00E+00 |
| 6h        | 0.00E+00 | 0.00E+00 | 0.00E+00 | 0.00E+00 |
| 12h       | 3.76E-06 | 1.38E-06 | 7.89E-07 | 6.78E-06 |
| 24h       | 1.19E-06 | 2.41E-07 | 7.42E-08 | 4.02E-06 |
| 36h       | 1.12E-06 | 4.07E-07 | 8.84E-07 | 9.53E-06 |
| 48h       | 2.06E-06 | 1.30E-07 | 5.87E-07 | 1.44E-06 |
| 72h       | 1.55E-06 | 7.52E-08 | 3.72E-07 | 2.10E-06 |
| cgd7_4060 |          |          |          |          |
| 2h        | 3.00E-06 | 2.27E-06 | 8.66E-07 | 2.09E-06 |
| 6h        | 3.30E-06 | 5.78E-06 | 5.53E-06 | 1.27E-05 |
| 12h       | 3.79E-07 | 5.03E-07 | 1.40E-06 | 2.53E-06 |
| 24h       | 1.05E-06 | 1.77E-06 | 2.43E-06 | 5.00E-06 |
| 36h       | 1.35E-06 | 1.50E-06 | 1.84E-06 | 1.22E-06 |
| 48h       | 2.00E-06 | 6.93E-07 | 3.98E-06 | 1.63E-06 |
| 72h       | 4.12E-07 | 4.31E-07 | 4.30E-07 | 5.85E-07 |
| cgd7_4270 |          |          |          |          |
| 2h        | 0.00E+00 | 2.22E-07 | 0.00E+00 | 3.88E-07 |
| 6h        | 0.00E+00 | 2.84E-08 | 1.59E-07 | 1.66E-07 |
| 12h       | 9.48E-07 | 1.15E-06 | 7.91E-07 | 6.05E-07 |
| 24h       | 5.75E-07 | 3.38E-07 | 3.54E-07 | 7.47E-07 |
| 36h       | 1.45E-06 | 1.60E-06 | 1.97E-06 | 2.49E-06 |
| 48h       | 3.01E-06 | 1.04E-06 | 1.93E-06 | 1.21E-06 |
| 72h       | 5.75E-07 | 3.94E-07 | 2.23E-07 | 7.17E-07 |

|     |           |          |          |          |
|-----|-----------|----------|----------|----------|
|     | cgd7_440  |          |          |          |
| 2h  | 2.73E-03  | 6.46E-04 | 3.79E-05 | 3.48E-03 |
| 6h  | 1.30E-04  | 2.72E-04 | 5.14E-05 | 6.44E-04 |
| 12h | 3.54E-04  | 3.59E-04 | 3.29E-04 | 1.02E-03 |
| 24h | 1.56E-03  | 7.62E-04 | 2.58E-04 | 1.88E-03 |
| 36h | 3.19E-04  | 2.69E-04 | 7.09E-05 | 2.92E-03 |
| 48h | 1.66E-03  | 1.59E-04 | 2.31E-04 | 3.57E-04 |
| 72h | 2.09E-04  | 1.51E-04 | 6.11E-05 | 1.99E-04 |
|     | cgd7_4430 |          |          |          |
| 2h  | 2.54E-04  | 3.81E-04 | 0.00E+00 | 7.01E-05 |
| 6h  | 7.92E-04  | 1.83E-03 | 9.09E-04 | 2.94E-04 |
| 12h | 3.49E-04  | 5.24E-04 | 1.40E-03 | 1.46E-04 |
| 24h | 2.10E-04  | 1.35E-04 | 3.42E-04 | 1.95E-04 |
| 36h | 3.36E-04  | 2.57E-04 | 2.95E-04 | 2.40E-04 |
| 48h | 1.48E-03  | 1.35E-03 | 8.99E-04 | 4.05E-04 |
| 72h | 4.49E-04  | 2.89E-04 | 9.85E-04 | 1.25E-04 |
|     | cgd7_4510 |          |          |          |
| 2h  | 1.89E-03  | 2.24E-03 | 3.00E-04 | 2.15E-03 |
| 6h  | 7.43E-05  | 2.42E-04 | 4.79E-05 | 3.25E-04 |
| 12h | 4.46E-04  | 1.12E-03 | 7.20E-04 | 1.21E-03 |
| 24h | 1.87E-03  | 7.64E-04 | 2.13E-04 | 2.12E-03 |
| 36h | 5.49E-04  | 1.08E-03 | 6.61E-04 | 2.62E-03 |
| 48h | 1.13E-03  | 3.34E-04 | 3.75E-04 | 7.75E-04 |
| 72h | 1.48E-04  | 2.27E-04 | 3.60E-05 | 2.38E-04 |
|     | cgd7_4550 |          |          |          |
| 2h  | 2.04E-06  | 6.85E-05 | 0.00E+00 | 1.69E-05 |
| 6h  | 1.02E-04  | 2.15E-03 | 1.16E-03 | 1.35E-04 |
| 12h | 1.96E-05  | 6.16E-04 | 5.33E-05 | 1.80E-05 |
| 24h | 9.22E-06  | 2.12E-04 | 3.88E-04 | 7.60E-05 |
| 36h | 2.28E-05  | 6.11E-04 | 9.44E-05 | 1.07E-04 |
| 48h | 3.20E-05  | 6.22E-04 | 1.44E-04 | 5.36E-05 |
| 72h | 1.18E-05  | 2.23E-04 | 1.08E-04 | 4.76E-05 |
|     | cgd7_4770 |          |          |          |
| 2h  | 2.34E-06  | 4.29E-05 | 2.30E-04 | 3.37E-06 |
| 6h  | 6.33E-06  | 1.03E-06 | 2.98E-05 | 1.10E-05 |
| 12h | 8.23E-06  | 0.00E+00 | 1.83E-05 | 1.13E-05 |
| 24h | 3.20E-06  | 7.87E-05 | 1.78E-05 | 4.94E-06 |
| 36h | 1.93E-06  | 9.08E-06 | 1.58E-05 | 3.14E-05 |
| 48h | 5.49E-06  | 5.34E-05 | 3.42E-05 | 1.56E-05 |
| 72h | 6.85E-06  | 1.52E-04 | 2.13E-04 | 1.57E-05 |
|     | cgd7_4800 |          |          |          |
| 2h  | 8.68E-07  | 4.00E-07 | 7.84E-07 | 1.77E-06 |
| 6h  | 0.00E+00  | 0.00E+00 | 0.00E+00 | 2.05E-07 |
| 12h | 2.76E-07  | 2.24E-08 | 7.31E-08 | 2.07E-08 |
| 24h | 1.38E-07  | 3.77E-09 | 1.85E-08 | 3.79E-08 |
| 36h | 1.58E-07  | 5.60E-08 | 4.83E-08 | 3.91E-07 |
| 48h | 5.96E-06  | 4.42E-06 | 4.41E-06 | 7.29E-06 |
| 72h | 2.02E-05  | 9.59E-06 | 2.85E-05 | 2.16E-05 |
|     | cgd7_4850 |          |          |          |
| 2h  | 3.43E-07  | 2.41E-08 | 6.23E-08 | 5.92E-07 |
| 6h  | 0.00E+00  | 2.02E-08 | 3.50E-08 | 1.53E-07 |
| 12h | 3.78E-07  | 1.80E-07 | 3.12E-07 | 1.52E-07 |
| 24h | 8.54E-08  | 8.92E-08 | 1.84E-07 | 5.07E-08 |

|     |           |          |          |          |
|-----|-----------|----------|----------|----------|
| 36h | 3.88E-07  | 7.20E-08 | 2.26E-07 | 5.79E-07 |
| 48h | 2.23E-07  | 8.56E-08 | 8.27E-08 | 4.40E-07 |
| 72h | 2.04E-07  | 2.59E-07 | 9.61E-07 | 8.75E-07 |
|     | cgd7_4890 |          |          |          |
| 2h  | 0.00E+00  | 0.00E+00 | 0.00E+00 | 0.00E+00 |
| 6h  | 1.11E-06  | 1.49E-07 | 1.07E-06 | 1.55E-07 |
| 12h | 3.83E-07  | 4.47E-08 | 1.43E-07 | 8.25E-08 |
| 24h | 4.27E-07  | 7.81E-08 | 1.63E-06 | 8.87E-07 |
| 36h | 2.17E-06  | 2.75E-07 | 8.01E-07 | 2.00E-06 |
| 48h | 1.56E-06  | 1.78E-07 | 5.81E-07 | 1.06E-06 |
| 72h | 4.93E-07  | 1.48E-07 | 1.01E-06 | 8.47E-07 |
|     | cgd7_4990 |          |          |          |
| 2h  | 3.72E-06  | 1.58E-05 | 8.09E-05 | 2.69E-06 |
| 6h  | 0.00E+00  | 4.86E-07 | 0.00E+00 | 4.01E-06 |
| 12h | 7.19E-05  | 4.73E-03 | 2.10E-04 | 3.78E-05 |
| 24h | 1.29E-05  | 2.02E-04 | 6.71E-05 | 1.63E-05 |
| 36h | 1.34E-05  | 4.12E-04 | 2.00E-04 | 1.03E-04 |
| 48h | 2.55E-05  | 4.14E-04 | 1.19E-04 | 7.51E-05 |
| 72h | 7.81E-05  | 1.80E-03 | 5.73E-04 | 1.12E-04 |
|     | cgd7_5070 |          |          |          |
| 2h  | 7.12E-07  | 2.63E-07 | 7.53E-07 | 1.30E-06 |
| 6h  | 6.78E-07  | 4.55E-07 | 9.77E-07 | 1.69E-06 |
| 12h | 9.58E-08  | 4.12E-09 | 1.92E-07 | 7.08E-08 |
| 24h | 1.65E-07  | 2.54E-07 | 6.73E-07 | 2.75E-07 |
| 36h | 5.74E-07  | 1.69E-07 | 3.01E-07 | 5.48E-07 |
| 48h | 2.02E-06  | 4.28E-04 | 5.51E-07 | 1.58E-06 |
| 72h | 5.53E-07  | 2.89E-07 | 1.41E-07 | 2.71E-07 |
|     | cgd7_510  |          |          |          |
| 2h  | 4.08E-05  | 1.83E-05 | 2.10E-04 | 1.09E-04 |
| 6h  | 6.34E-05  | 1.61E-05 | 6.76E-05 | 1.33E-04 |
| 12h | 2.63E-05  | 3.24E-06 | 1.39E-04 | 5.30E-05 |
| 24h | 6.35E-05  | 2.07E-05 | 4.29E-05 | 1.03E-04 |
| 36h | 1.65E-05  | 1.09E-05 | 2.79E-05 | 1.70E-04 |
| 48h | 1.44E-05  | 9.78E-06 | 6.81E-05 | 6.70E-05 |
| 72h | 2.07E-05  | 1.36E-05 | 7.47E-05 | 7.92E-05 |
|     | cgd7_5160 |          |          |          |
| 2h  | 2.12E-04  | 2.52E-05 | 2.05E-04 | 2.67E-04 |
| 6h  | 2.71E-04  | 9.85E-05 | 3.38E-04 | 8.83E-04 |
| 12h | 8.99E-06  | 2.44E-07 | 1.77E-04 | 4.00E-05 |
| 24h | 8.15E-05  | 2.20E-05 | 2.38E-04 | 1.58E-04 |
| 36h | 7.28E-05  | 2.34E-05 | 5.68E-05 | 1.55E-04 |
| 48h | 1.11E-04  | 4.51E-05 | 2.76E-04 | 1.29E-04 |
| 72h | 2.92E-04  | 5.54E-05 | 1.04E-03 | 5.46E-04 |
|     | cgd7_5320 |          |          |          |
| 2h  | 2.07E-06  | 1.96E-07 | 9.32E-07 | 1.27E-06 |
| 6h  | 4.50E-06  | 4.68E-08 | 2.69E-07 | 3.51E-07 |
| 12h | 2.53E-06  | 1.26E-07 | 1.26E-06 | 2.39E-07 |
| 24h | 8.67E-07  | 2.59E-07 | 4.70E-07 | 3.26E-07 |
| 36h | 4.73E-07  | 5.52E-08 | 2.72E-07 | 1.59E-07 |
| 48h | 7.23E-07  | 8.21E-08 | 2.12E-07 | 5.16E-07 |
| 72h | 1.11E-06  | 3.45E-08 | 1.63E-07 | 1.99E-07 |
|     | cgd7_540  |          |          |          |
| 2h  | 0.00E+00  | 0.00E+00 | 0.00E+00 | 0.00E+00 |

|           |          |          |          |          |
|-----------|----------|----------|----------|----------|
| 6h        | 0.00E+00 | 0.00E+00 | 0.00E+00 | 0.00E+00 |
| 12h       | 0.00E+00 | 0.00E+00 | 0.00E+00 | 1.83E-07 |
| 24h       | 1.15E-06 | 8.10E-08 | 3.29E-07 | 9.90E-07 |
| 36h       | 1.13E-06 | 3.70E-07 | 9.43E-07 | 8.97E-06 |
| 48h       | 4.36E-06 | 5.60E-07 | 4.60E-06 | 9.56E-06 |
| 72h       | 1.36E-05 | 3.96E-07 | 1.33E-06 | 1.65E-06 |
| cgd7_5400 |          |          |          |          |
| 2h        | 0.00E+00 | 0.00E+00 | 0.00E+00 | 0.00E+00 |
| 6h        | 0.00E+00 | 0.00E+00 | 0.00E+00 | 0.00E+00 |
| 12h       | 0.00E+00 | 4.32E-06 | 2.23E-06 | 3.28E-06 |
| 24h       | 3.90E-06 | 1.46E-07 | 1.60E-06 | 9.30E-07 |
| 36h       | 2.09E-06 | 4.92E-07 | 5.27E-07 | 4.46E-06 |
| 48h       | 2.98E-05 | 5.66E-07 | 6.91E-06 | 1.54E-05 |
| 72h       | 7.06E-06 | 2.41E-06 | 1.21E-05 | 3.13E-05 |
| cgd7_550  |          |          |          |          |
| 2h        | 0.00E+00 | 0.00E+00 | 0.00E+00 | 0.00E+00 |
| 6h        | 0.00E+00 | 0.00E+00 | 0.00E+00 | 0.00E+00 |
| 12h       | 3.19E-04 | 1.19E-03 | 3.26E-04 | 2.76E-03 |
| 24h       | 1.57E-04 | 1.26E-03 | 4.13E-05 | 6.39E-04 |
| 36h       | 1.70E-04 | 5.12E-04 | 3.71E-04 | 2.52E-03 |
| 48h       | 3.40E-05 | 1.62E-04 | 1.14E-04 | 1.87E-04 |
| 72h       | 2.35E-06 | 2.05E-05 | 1.23E-05 | 9.38E-05 |
| cgd7_570  |          |          |          |          |
| 2h        | 3.27E-06 | 4.82E-06 | 5.34E-07 | 1.53E-05 |
| 6h        | 4.25E-07 | 4.14E-06 | 4.10E-07 | 7.01E-06 |
| 12h       | 1.16E-06 | 1.08E-06 | 9.88E-07 | 3.56E-06 |
| 24h       | 3.62E-06 | 4.28E-06 | 1.45E-06 | 3.99E-06 |
| 36h       | 7.47E-07 | 7.24E-07 | 3.31E-07 | 2.25E-06 |
| 48h       | 8.63E-07 | 7.77E-07 | 1.43E-06 | 2.60E-06 |
| 72h       | 3.57E-07 | 4.47E-07 | 1.15E-06 | 2.37E-06 |
| cgd7_590  |          |          |          |          |
| 2h        | 0.00E+00 | 0.00E+00 | 0.00E+00 | 0.00E+00 |
| 6h        | 0.00E+00 | 0.00E+00 | 0.00E+00 | 0.00E+00 |
| 12h       | 1.72E-07 | 3.54E-07 | 7.49E-08 | 1.01E-07 |
| 24h       | 2.76E-08 | 1.37E-07 | 3.06E-08 | 2.72E-07 |
| 36h       | 9.69E-08 | 3.03E-07 | 2.65E-07 | 5.94E-07 |
| 48h       | 1.57E-07 | 1.95E-07 | 2.23E-07 | 2.71E-07 |
| 72h       | 3.69E-08 | 6.40E-08 | 1.10E-07 | 1.34E-07 |
| cgd7_600  |          |          |          |          |
| 2h        | 0.00E+00 | 0.00E+00 | 0.00E+00 | 0.00E+00 |
| 6h        | 0.00E+00 | 0.00E+00 | 0.00E+00 | 0.00E+00 |
| 12h       | 4.50E-08 | 2.76E-07 | 1.21E-07 | 9.45E-07 |
| 24h       | 6.89E-08 | 2.34E-07 | 7.66E-08 | 2.68E-07 |
| 36h       | 7.02E-08 | 2.87E-07 | 3.10E-07 | 1.48E-06 |
| 48h       | 6.78E-08 | 1.11E-07 | 1.01E-07 | 5.95E-07 |
| 72h       | 1.75E-08 | 1.19E-07 | 9.25E-08 | 1.94E-07 |
| cgd7_610  |          |          |          |          |
| 2h        | 1.05E-07 | 5.08E-07 | 4.16E-08 | 1.11E-06 |
| 6h        | 1.97E-08 | 2.08E-07 | 2.77E-08 | 4.11E-07 |
| 12h       | 7.24E-08 | 1.03E-07 | 1.20E-07 | 2.42E-07 |
| 24h       | 1.05E-07 | 1.42E-07 | 6.74E-08 | 2.64E-07 |
| 36h       | 7.67E-08 | 1.28E-07 | 1.62E-07 | 2.01E-07 |
| 48h       | 1.04E-07 | 9.33E-08 | 6.82E-08 | 9.98E-08 |

|     |           |          |          |          |
|-----|-----------|----------|----------|----------|
| 72h | 2.18E-08  | 2.22E-08 | 5.39E-08 | 1.19E-07 |
|     | cgd7_800  |          |          |          |
| 2h  | 1.12E-08  | 0.00E+00 | 0.00E+00 | 1.06E-07 |
| 6h  | 7.19E-09  | 2.45E-08 | 0.00E+00 | 7.39E-08 |
| 12h | 1.79E-07  | 1.14E-06 | 5.14E-08 | 1.97E-07 |
| 24h | 4.94E-08  | 6.59E-08 | 1.01E-08 | 8.04E-08 |
| 36h | 1.47E-08  | 1.15E-07 | 6.21E-08 | 1.96E-07 |
| 48h | 5.53E-08  | 2.93E-08 | 7.36E-08 | 1.79E-07 |
| 72h | 2.04E-08  | 3.22E-08 | 1.95E-07 | 7.85E-08 |
|     | cgd7_810  |          |          |          |
| 2h  | 0.00E+00  | 0.00E+00 | 0.00E+00 | 0.00E+00 |
| 6h  | 1.07E-07  | 7.00E-07 | 1.33E-07 | 1.46E-06 |
| 12h | 8.57E-08  | 0.00E+00 | 1.99E-08 | 0.00E+00 |
| 24h | 3.62E-08  | 9.86E-08 | 1.24E-07 | 5.91E-07 |
| 36h | 1.93E-07  | 7.43E-07 | 1.13E-07 | 8.11E-07 |
| 48h | 2.03E-07  | 3.59E-07 | 3.08E-07 | 1.26E-06 |
| 72h | 2.79E-07  | 2.47E-07 | 1.75E-06 | 9.72E-07 |
|     | cgd7_850  |          |          |          |
| 2h  | 9.14E-09  | 2.09E-08 | 9.33E-09 | 0.00E+00 |
| 6h  | 0.00E+00  | 1.51E-08 | 0.00E+00 | 0.00E+00 |
| 12h | 0.00E+00  | 0.00E+00 | 3.73E-09 | 3.02E-08 |
| 24h | 2.15E-08  | 6.16E-09 | 4.20E-09 | 6.89E-08 |
| 36h | 1.15E-08  | 4.77E-08 | 1.37E-08 | 4.52E-08 |
| 48h | 3.30E-06  | 3.34E-06 | 9.74E-06 | 6.96E-06 |
| 72h | 9.68E-06  | 1.64E-05 | 1.71E-05 | 1.14E-05 |
|     | cgd7_870  |          |          |          |
| 2h  | 2.95E-08  | 6.51E-08 | 0.00E+00 | 3.62E-07 |
| 6h  | 1.44E-07  | 4.58E-07 | 1.67E-07 | 1.25E-06 |
| 12h | 2.85E-08  | 5.07E-07 | 2.74E-07 | 6.41E-07 |
| 24h | 2.99E-07  | 8.62E-07 | 5.25E-07 | 2.99E-06 |
| 36h | 4.35E-07  | 2.34E-06 | 6.69E-07 | 3.35E-06 |
| 48h | 9.45E-07  | 1.99E-06 | 8.94E-07 | 2.95E-06 |
| 72h | 1.45E-07  | 4.04E-07 | 3.43E-07 | 5.57E-07 |
|     | cgd7_890  |          |          |          |
| 2h  | 8.77E-07  | 4.10E-06 | 0.00E+00 | 1.52E-06 |
| 6h  | 1.07E-06  | 4.10E-06 | 2.94E-06 | 8.88E-06 |
| 12h | 3.51E-08  | 2.18E-07 | 2.95E-07 | 1.44E-06 |
| 24h | 4.36E-07  | 1.23E-06 | 8.45E-07 | 5.77E-06 |
| 36h | 5.05E-07  | 1.16E-06 | 7.94E-07 | 1.79E-06 |
| 48h | 4.80E-07  | 7.73E-07 | 1.05E-06 | 1.96E-06 |
| 72h | 3.16E-07  | 2.62E-07 | 4.85E-07 | 2.95E-07 |
|     | cgd7_990  |          |          |          |
| 2h  | 0.00E+00  | 4.62E-05 | 1.02E-05 | 3.38E-06 |
| 6h  | 2.46E-05  | 3.14E-05 | 9.89E-05 | 1.83E-05 |
| 12h | 5.73E-06  | 7.57E-05 | 1.61E-04 | 2.33E-05 |
| 24h | 2.16E-05  | 5.09E-05 | 1.46E-04 | 6.17E-05 |
| 36h | 1.24E-04  | 3.74E-05 | 1.28E-04 | 3.06E-05 |
| 48h | 3.27E-04  | 7.86E-05 | 5.52E-04 | 7.17E-05 |
| 72h | 6.38E-04  | 2.14E-04 | 6.30E-04 | 1.76E-04 |
|     | cgd8_1070 |          |          |          |
| 2h  | 0.00E+00  | 3.93E-07 | 0.00E+00 | 2.82E-07 |
| 6h  | 1.51E-08  | 4.59E-07 | 3.28E-07 | 4.07E-07 |
| 12h | 3.26E-08  | 9.88E-08 | 4.19E-08 | 8.54E-08 |

|           |          |          |          |          |
|-----------|----------|----------|----------|----------|
| 24h       | 6.32E-08 | 2.02E-07 | 6.78E-07 | 7.84E-07 |
| 36h       | 7.94E-07 | 9.79E-07 | 5.98E-07 | 4.78E-07 |
| 48h       | 4.02E-07 | 5.00E-07 | 9.37E-07 | 8.85E-07 |
| 72h       | 6.31E-07 | 6.37E-07 | 2.88E-06 | 1.10E-06 |
| cgd8_1100 |          |          |          |          |
| 2h        | 5.09E-04 | 2.79E-05 | 4.53E-06 | 9.82E-06 |
| 6h        | 7.17E-05 | 6.32E-05 | 2.93E-06 | 6.45E-06 |
| 12h       | 5.88E-05 | 3.64E-05 | 1.99E-05 | 4.77E-05 |
| 24h       | 7.52E-05 | 1.00E-04 | 1.01E-05 | 9.35E-06 |
| 36h       | 2.76E-05 | 1.36E-05 | 4.20E-06 | 4.68E-06 |
| 48h       | 1.72E-05 | 5.27E-06 | 4.53E-06 | 4.83E-06 |
| 72h       | 1.15E-05 | 4.91E-06 | 2.73E-06 | 1.53E-06 |
| cgd8_1110 |          |          |          |          |
| 2h        | 0.00E+00 | 0.00E+00 | 0.00E+00 | 0.00E+00 |
| 6h        | 1.43E-06 | 1.32E-06 | 5.60E-07 | 4.17E-08 |
| 12h       | 8.63E-06 | 3.38E-07 | 3.78E-07 | 5.11E-07 |
| 24h       | 9.15E-06 | 1.66E-05 | 2.46E-06 | 4.22E-06 |
| 36h       | 1.03E-04 | 2.65E-05 | 3.46E-06 | 6.12E-06 |
| 48h       | 9.91E-05 | 1.69E-05 | 5.43E-06 | 4.85E-06 |
| 72h       | 2.71E-05 | 1.55E-05 | 3.26E-06 | 1.60E-06 |
| cgd8_1130 |          |          |          |          |
| 2h        | 5.67E-06 | 0.00E+00 | 0.00E+00 | 0.00E+00 |
| 6h        | 0.00E+00 | 3.30E-06 | 0.00E+00 | 0.00E+00 |
| 12h       | 9.86E-05 | 2.19E-04 | 5.29E-06 | 5.44E-06 |
| 24h       | 1.37E-05 | 1.44E-05 | 2.83E-08 | 2.66E-07 |
| 36h       | 5.44E-06 | 1.14E-06 | 2.87E-07 | 4.01E-06 |
| 48h       | 5.16E-06 | 1.04E-06 | 2.06E-07 | 2.29E-07 |
| 72h       | 5.14E-06 | 2.15E-06 | 1.14E-06 | 7.13E-07 |
| cgd8_1140 |          |          |          |          |
| 2h        | 0.00E+00 | 0.00E+00 | 0.00E+00 | 0.00E+00 |
| 6h        | 0.00E+00 | 3.34E-06 | 0.00E+00 | 1.93E-06 |
| 12h       | 3.05E-05 | 1.10E-04 | 1.37E-04 | 4.36E-04 |
| 24h       | 2.35E-06 | 3.37E-05 | 1.98E-05 | 5.59E-05 |
| 36h       | 4.88E-06 | 1.69E-05 | 4.20E-05 | 8.59E-05 |
| 48h       | 6.54E-06 | 5.18E-06 | 1.43E-05 | 4.31E-05 |
| 72h       | 1.06E-05 | 2.42E-05 | 2.53E-05 | 1.82E-04 |
| cgd8_1190 |          |          |          |          |
| 2h        | 0.00E+00 | 1.26E-06 | 0.00E+00 | 0.00E+00 |
| 6h        | 0.00E+00 | 0.00E+00 | 2.69E-09 | 0.00E+00 |
| 12h       | 1.44E-08 | 3.73E-08 | 2.34E-09 | 1.07E-09 |
| 24h       | 7.80E-09 | 8.19E-09 | 3.29E-09 | 1.91E-10 |
| 36h       | 3.56E-09 | 1.16E-09 | 4.43E-09 | 5.25E-10 |
| 48h       | 5.70E-08 | 3.19E-09 | 1.41E-09 | 9.89E-10 |
| 72h       | 2.56E-08 | 6.70E-09 | 8.72E-08 | 4.78E-09 |
| cgd8_1210 |          |          |          |          |
| 2h        | 6.48E-05 | 2.96E-05 | 2.54E-07 | 8.94E-07 |
| 6h        | 2.32E-05 | 2.82E-05 | 9.09E-07 | 3.23E-06 |
| 12h       | 5.65E-06 | 1.11E-06 | 2.67E-06 | 2.23E-06 |
| 24h       | 3.42E-05 | 1.35E-05 | 2.42E-06 | 3.04E-06 |
| 36h       | 1.23E-05 | 1.26E-05 | 1.25E-06 | 9.94E-07 |
| 48h       | 6.73E-05 | 1.12E-05 | 3.39E-06 | 7.02E-06 |
| 72h       | 4.20E-05 | 9.47E-06 | 5.39E-06 | 2.76E-06 |
| cgd8_1250 |          |          |          |          |

|     |           |          |          |          |
|-----|-----------|----------|----------|----------|
| 2h  | 0.00E+00  | 0.00E+00 | 0.00E+00 | 0.00E+00 |
| 6h  | 9.56E-06  | 1.64E-05 | 4.90E-06 | 3.02E-06 |
| 12h | 4.73E-06  | 9.69E-04 | 1.65E-06 | 2.96E-07 |
| 24h | 3.94E-06  | 4.36E-06 | 1.09E-05 | 3.17E-06 |
| 36h | 1.49E-05  | 1.01E-05 | 3.96E-06 | 4.35E-06 |
| 48h | 1.32E-05  | 8.76E-06 | 4.19E-06 | 3.63E-06 |
| 72h | 1.03E-05  | 2.76E-06 | 3.43E-06 | 1.06E-06 |
|     | cgd8_130  |          |          |          |
| 2h  | 3.65E-05  | 1.11E-03 | 2.74E-05 | 3.42E-04 |
| 6h  | 6.74E-05  | 4.52E-04 | 5.91E-04 | 2.68E-03 |
| 12h | 1.25E-05  | 4.78E-04 | 5.74E-05 | 2.20E-04 |
| 24h | 1.93E-05  | 5.27E-04 | 3.08E-04 | 3.06E-04 |
| 36h | 2.44E-05  | 2.22E-04 | 6.73E-05 | 2.17E-04 |
| 48h | 2.57E-05  | 2.13E-04 | 1.03E-04 | 2.88E-04 |
| 72h | 6.60E-05  | 2.70E-04 | 7.73E-04 | 2.97E-05 |
|     | cgd8_1300 |          |          |          |
| 2h  | 3.41E-07  | 1.61E-07 | 8.03E-09 | 1.28E-07 |
| 6h  | 0.00E+00  | 8.69E-09 | 1.31E-08 | 2.13E-07 |
| 12h | 3.43E-08  | 9.43E-08 | 3.39E-08 | 1.10E-08 |
| 24h | 5.40E-07  | 2.10E-07 | 1.85E-07 | 1.34E-08 |
| 36h | 5.63E-06  | 1.16E-06 | 1.84E-07 | 1.43E-07 |
| 48h | 2.28E-06  | 1.38E-06 | 7.06E-07 | 2.51E-07 |
| 72h | 5.77E-06  | 1.10E-06 | 4.57E-07 | 1.80E-07 |
|     | cgd8_1310 |          |          |          |
| 2h  | 2.00E-06  | 2.57E-07 | 0.00E+00 | 8.10E-09 |
| 6h  | 7.06E-06  | 2.98E-07 | 1.04E-08 | 1.90E-08 |
| 12h | 1.50E-06  | 1.24E-07 | 2.89E-08 | 2.42E-08 |
| 24h | 1.67E-07  | 1.20E-07 | 4.23E-08 | 6.86E-08 |
| 36h | 1.02E-06  | 3.66E-07 | 6.86E-08 | 2.97E-08 |
| 48h | 2.60E-06  | 2.57E-07 | 3.34E-08 | 6.14E-08 |
| 72h | 2.35E-06  | 1.44E-07 | 6.69E-08 | 6.71E-08 |
|     | cgd8_1340 |          |          |          |
| 2h  | 1.30E-05  | 2.08E-04 | 1.72E-05 | 6.03E-05 |
| 6h  | 1.17E-05  | 3.00E-04 | 2.73E-03 | 8.43E-04 |
| 12h | 2.25E-06  | 1.09E-04 | 7.63E-04 | 4.24E-05 |
| 24h | 4.06E-06  | 2.32E-04 | 2.60E-03 | 3.04E-04 |
| 36h | 4.26E-06  | 1.47E-04 | 5.09E-04 | 1.61E-04 |
| 48h | 3.40E-06  | 4.38E-05 | 1.76E-04 | 3.18E-04 |
| 72h | 1.52E-06  | 1.10E-04 | 5.91E-05 | 2.61E-04 |
|     | cgd8_1390 |          |          |          |
| 2h  | 1.02E-05  | 4.94E-07 | 2.80E-08 | 2.12E-07 |
| 6h  | 0.00E+00  | 1.62E-08 | 5.48E-08 | 6.34E-08 |
| 12h | 9.04E-07  | 0.00E+00 | 9.13E-09 | 4.65E-08 |
| 24h | 1.88E-06  | 8.93E-08 | 6.92E-08 | 2.09E-08 |
| 36h | 6.38E-06  | 8.03E-07 | 9.47E-08 | 2.10E-07 |
| 48h | 1.23E-04  | 2.90E-06 | 1.31E-06 | 1.70E-06 |
| 72h | 9.15E-05  | 2.35E-06 | 4.45E-06 | 9.92E-07 |
|     | cgd8_140  |          |          |          |
| 2h  | 8.46E-09  | 6.11E-09 | 1.08E-08 | 4.89E-08 |
| 6h  | 6.61E-07  | 1.94E-06 | 8.07E-07 | 6.50E-07 |
| 12h | 6.44E-08  | 3.35E-08 | 1.64E-07 | 1.42E-07 |
| 24h | 5.04E-07  | 7.97E-07 | 2.32E-06 | 1.73E-06 |
| 36h | 2.27E-06  | 1.19E-06 | 1.14E-06 | 1.95E-06 |



|     |           |          |          |          |
|-----|-----------|----------|----------|----------|
| 48h | 2.06E-06  | 1.51E-06 | 3.68E-06 | 2.93E-06 |
| 72h | 7.29E-07  | 3.14E-07 | 6.85E-07 | 7.02E-07 |
|     | cgd8_1410 |          |          |          |
| 2h  | 3.07E-06  | 0.00E+00 | 3.33E-05 | 0.00E+00 |
| 6h  | 2.47E-05  | 2.16E-05 | 1.96E-05 | 1.11E-05 |
| 12h | 7.85E-06  | 4.75E-05 | 1.99E-05 | 2.57E-06 |
| 24h | 9.64E-06  | 1.05E-04 | 1.96E-05 | 6.11E-05 |
| 36h | 1.31E-05  | 4.53E-05 | 3.54E-05 | 4.49E-05 |
| 48h | 4.06E-05  | 2.54E-05 | 5.06E-05 | 1.23E-04 |
| 72h | 8.21E-05  | 6.29E-05 | 7.16E-05 | 3.85E-04 |
|     | cgd8_1420 |          |          |          |
| 2h  | 1.25E-06  | 0.00E+00 | 0.00E+00 | 1.50E-08 |
| 6h  | 2.48E-05  | 3.34E-06 | 1.34E-05 | 1.92E-06 |
| 12h | 6.21E-07  | 1.84E-08 | 9.49E-07 | 4.32E-08 |
| 24h | 9.15E-06  | 1.89E-06 | 2.43E-05 | 2.78E-06 |
| 36h | 6.62E-06  | 2.66E-06 | 5.22E-06 | 4.18E-07 |
| 48h | 1.13E-05  | 2.26E-06 | 2.08E-05 | 1.19E-06 |
| 72h | 5.42E-05  | 3.29E-06 | 2.76E-05 | 1.47E-06 |
|     | cgd8_1460 |          |          |          |
| 2h  | 3.82E-06  | 1.15E-06 | 9.58E-07 | 1.20E-06 |
| 6h  | 1.71E-07  | 4.35E-07 | 4.06E-07 | 1.58E-07 |
| 12h | 4.58E-07  | 5.70E-08 | 1.29E-06 | 7.06E-07 |
| 24h | 1.95E-06  | 9.54E-07 | 2.37E-06 | 4.54E-07 |
| 36h | 5.28E-07  | 7.22E-07 | 7.02E-07 | 8.00E-07 |
| 48h | 1.20E-06  | 2.47E-07 | 1.18E-06 | 3.59E-07 |
| 72h | 9.33E-07  | 9.78E-07 | 8.72E-07 | 6.11E-07 |
|     | cgd8_1470 |          |          |          |
| 2h  | 8.38E-04  | 4.73E-04 | 3.57E-04 | 4.13E-05 |
| 6h  | 3.21E-04  | 4.14E-04 | 3.40E-04 | 2.53E-05 |
| 12h | 4.90E-05  | 1.95E-05 | 7.84E-05 | 5.33E-06 |
| 24h | 1.72E-04  | 1.61E-04 | 1.59E-04 | 4.37E-05 |
| 36h | 1.22E-04  | 1.18E-04 | 2.03E-04 | 2.45E-05 |
| 48h | 1.22E-04  | 1.19E-04 | 3.53E-04 | 1.56E-05 |
| 72h | 3.67E-04  | 1.99E-04 | 4.58E-04 | 2.89E-05 |
|     | cgd8_1480 |          |          |          |
| 2h  | 5.89E-05  | 5.84E-06 | 2.02E-05 | 6.02E-06 |
| 6h  | 1.04E-03  | 9.78E-05 | 1.73E-04 | 1.24E-05 |
| 12h | 1.18E-03  | 5.29E-05 | 4.12E-04 | 1.00E-05 |
| 24h | 4.66E-04  | 4.60E-05 | 3.03E-04 | 1.69E-05 |
| 36h | 3.57E-04  | 7.01E-05 | 4.08E-04 | 1.79E-05 |
| 48h | 2.05E-04  | 5.39E-05 | 3.15E-04 | 1.58E-05 |
| 72h | 6.38E-05  | 1.72E-05 | 5.74E-05 | 2.35E-06 |
|     | cgd8_1490 |          |          |          |
| 2h  | 8.26E-08  | 5.13E-08 | 7.11E-08 | 7.46E-08 |
| 6h  | 7.18E-08  | 6.28E-08 | 1.12E-07 | 2.10E-08 |
| 12h | 1.74E-07  | 2.59E-07 | 1.79E-07 | 2.51E-08 |
| 24h | 8.69E-08  | 8.68E-08 | 1.95E-07 | 2.03E-08 |
| 36h | 1.20E-07  | 6.87E-08 | 1.57E-07 | 4.45E-08 |
| 48h | 1.84E-07  | 1.16E-07 | 1.86E-07 | 4.49E-08 |
| 72h | 3.24E-07  | 2.17E-07 | 3.40E-07 | 8.53E-08 |
|     | cgd8_1550 |          |          |          |
| 2h  | 2.89E-06  | 2.86E-06 | 1.41E-07 | 1.08E-06 |
| 6h  | 3.65E-07  | 1.16E-07 | 1.17E-07 | 3.82E-07 |

|     |           |          |          |          |
|-----|-----------|----------|----------|----------|
| 12h | 1.10E-06  | 2.26E-07 | 8.53E-07 | 3.62E-07 |
| 24h | 1.21E-06  | 1.49E-06 | 2.49E-07 | 6.99E-07 |
| 36h | 5.43E-07  | 5.83E-07 | 3.73E-07 | 5.61E-07 |
| 48h | 1.14E-06  | 1.27E-06 | 1.27E-06 | 3.56E-07 |
| 72h | 3.09E-07  | 2.35E-07 | 6.55E-07 | 2.52E-07 |
|     | cgd8_1640 |          |          |          |
| 2h  | 2.52E-08  | 1.96E-08 | 0.00E+00 | 7.92E-09 |
| 6h  | 1.05E-08  | 8.92E-08 | 2.45E-07 | 1.59E-08 |
| 12h | 1.57E-06  | 3.55E-07 | 8.35E-07 | 1.38E-07 |
| 24h | 1.35E-06  | 9.23E-07 | 2.47E-06 | 7.08E-07 |
| 36h | 4.08E-06  | 1.85E-06 | 4.85E-06 | 1.16E-06 |
| 48h | 4.82E-06  | 1.98E-06 | 8.70E-06 | 5.21E-07 |
| 72h | 6.35E-06  | 1.41E-06 | 8.79E-06 | 4.02E-07 |
|     | cgd8_1810 |          |          |          |
| 2h  | 5.06E-09  | 9.25E-08 | 5.45E-09 | 2.26E-08 |
| 6h  | 0.00E+00  | 5.20E-09 | 2.45E-09 | 3.70E-09 |
| 12h | 1.93E-08  | 3.43E-08 | 4.41E-08 | 5.65E-08 |
| 24h | 4.63E-08  | 2.02E-07 | 2.06E-08 | 3.17E-08 |
| 36h | 7.41E-08  | 3.96E-08 | 5.38E-08 | 1.69E-08 |
| 48h | 5.56E-08  | 4.69E-08 | 9.00E-08 | 2.89E-08 |
| 72h | 3.43E-08  | 2.02E-08 | 4.50E-08 | 1.40E-08 |
|     | cgd8_1820 |          |          |          |
| 2h  | 3.33E-05  | 1.14E-05 | 9.98E-06 | 8.65E-06 |
| 6h  | 1.97E-05  | 8.80E-05 | 3.60E-05 | 2.20E-05 |
| 12h | 2.32E-06  | 1.93E-06 | 1.15E-05 | 5.30E-06 |
| 24h | 8.62E-06  | 2.97E-05 | 1.81E-05 | 1.76E-05 |
| 36h | 1.16E-05  | 1.13E-05 | 1.73E-05 | 6.31E-06 |
| 48h | 9.11E-06  | 6.48E-06 | 8.45E-06 | 1.60E-05 |
| 72h | 2.60E-06  | 8.33E-07 | 3.54E-06 | 5.03E-07 |
|     | cgd8_1920 |          |          |          |
| 2h  | 9.98E-05  | 1.23E-03 | 1.47E-04 | 2.29E-05 |
| 6h  | 3.71E-04  | 6.77E-04 | 6.05E-04 | 7.34E-04 |
| 12h | 8.51E-05  | 1.54E-04 | 1.58E-04 | 7.95E-05 |
| 24h | 2.70E-04  | 8.46E-04 | 2.28E-04 | 5.82E-04 |
| 36h | 1.02E-04  | 1.13E-04 | 3.55E-04 | 3.40E-04 |
| 48h | 1.04E-04  | 1.35E-04 | 1.60E-04 | 2.41E-04 |
| 72h | 9.22E-05  | 2.50E-04 | 1.08E-04 | 9.89E-05 |
|     | cgd8_1950 |          |          |          |
| 2h  | 1.47E-06  | 1.59E-06 | 3.17E-08 | 2.16E-06 |
| 6h  | 3.15E-07  | 1.78E-06 | 2.24E-07 | 1.69E-06 |
| 12h | 1.26E-07  | 7.74E-08 | 4.19E-07 | 3.06E-07 |
| 24h | 5.31E-07  | 6.08E-07 | 4.96E-07 | 5.80E-07 |
| 36h | 6.87E-07  | 5.57E-07 | 5.87E-07 | 2.74E-07 |
| 48h | 7.86E-07  | 3.05E-07 | 1.15E-07 | 1.10E-07 |
| 72h | 7.06E-07  | 2.12E-07 | 5.69E-07 | 1.21E-06 |
|     | cgd8_2230 |          |          |          |
| 2h  | 0.00E+00  | 0.00E+00 | 0.00E+00 | 0.00E+00 |
| 6h  | 0.00E+00  | 0.00E+00 | 0.00E+00 | 0.00E+00 |
| 12h | 2.72E-09  | 1.26E-07 | 1.05E-07 | 1.19E-07 |
| 24h | 7.72E-08  | 6.37E-08 | 1.56E-07 | 6.87E-08 |
| 36h | 6.36E-07  | 3.02E-07 | 1.64E-07 | 3.57E-07 |
| 48h | 2.11E-06  | 6.80E-07 | 1.02E-06 | 1.21E-06 |
| 72h | 1.99E-06  | 1.98E-06 | 1.52E-06 | 2.44E-06 |

|     |           |          |          |          |          |
|-----|-----------|----------|----------|----------|----------|
|     | cgd8_2240 |          |          |          |          |
| 2h  | 0.00E+00  | 0.00E+00 | 0.00E+00 | 0.00E+00 | 0.00E+00 |
| 6h  | 0.00E+00  | 0.00E+00 | 0.00E+00 | 0.00E+00 | 0.00E+00 |
| 12h | 4.76E-08  | 2.82E-08 | 4.11E-08 | 3.61E-08 | 3.61E-08 |
| 24h | 1.93E-08  | 3.36E-08 | 4.77E-08 | 4.42E-08 | 4.42E-08 |
| 36h | 1.87E-07  | 6.06E-08 | 5.36E-08 | 8.05E-08 | 8.05E-08 |
| 48h | 4.93E-07  | 1.71E-07 | 5.74E-07 | 3.73E-07 | 3.73E-07 |
| 72h | 5.73E-07  | 3.92E-07 | 3.99E-07 | 5.13E-07 | 5.13E-07 |
|     | cgd8_2280 |          |          |          |          |
| 2h  | 7.75E-04  | 4.38E-04 | 5.68E-04 | 1.61E-03 | 1.61E-03 |
| 6h  | 5.44E-05  | 2.70E-04 | 1.04E-05 | 4.71E-04 | 4.71E-04 |
| 12h | 9.39E-04  | 9.51E-04 | 1.29E-03 | 2.67E-04 | 2.67E-04 |
| 24h | 9.55E-04  | 4.87E-04 | 5.75E-04 | 2.39E-04 | 2.39E-04 |
| 36h | 4.36E-04  | 9.60E-04 | 6.57E-04 | 2.04E-04 | 2.04E-04 |
| 48h | 8.09E-04  | 2.16E-04 | 3.55E-04 | 3.15E-04 | 3.15E-04 |
| 72h | 1.04E-03  | 8.36E-04 | 9.47E-04 | 1.69E-04 | 1.69E-04 |
|     | cgd8_2290 |          |          |          |          |
| 2h  | 0.00E+00  | 4.76E-08 | 0.00E+00 | 0.00E+00 | 0.00E+00 |
| 6h  | 0.00E+00  | 0.00E+00 | 0.00E+00 | 0.00E+00 | 0.00E+00 |
| 12h | 5.43E-07  | 1.21E-06 | 7.09E-07 | 1.94E-07 | 1.94E-07 |
| 24h | 3.67E-07  | 1.47E-07 | 4.65E-07 | 3.59E-07 | 3.59E-07 |
| 36h | 5.23E-07  | 3.46E-07 | 5.60E-07 | 1.56E-06 | 1.56E-06 |
| 48h | 5.80E-07  | 2.53E-07 | 3.53E-07 | 1.52E-06 | 1.52E-06 |
| 72h | 2.09E-06  | 1.44E-06 | 2.24E-06 | 6.03E-06 | 6.03E-06 |
|     | cgd8_2310 |          |          |          |          |
| 2h  | 6.90E-05  | 2.44E-04 | 0.00E+00 | 1.39E-05 | 1.39E-05 |
| 6h  | 5.75E-05  | 7.21E-04 | 4.54E-05 | 1.48E-05 | 1.48E-05 |
| 12h | 2.17E-05  | 3.50E-05 | 1.79E-05 | 7.22E-06 | 7.22E-06 |
| 24h | 2.05E-05  | 8.23E-05 | 1.42E-05 | 2.39E-05 | 2.39E-05 |
| 36h | 4.61E-05  | 2.18E-03 | 2.88E-05 | 3.27E-05 | 3.27E-05 |
| 48h | 2.85E-04  | 7.50E-03 | 1.19E-04 | 1.93E-05 | 1.93E-05 |
| 72h | 8.09E-06  | 1.75E-03 | 9.50E-05 | 1.65E-04 | 1.65E-04 |
|     | cgd8_2350 |          |          |          |          |
| 2h  | 6.30E-04  | 9.52E-03 | 1.16E-03 | 9.90E-04 | 9.90E-04 |
| 6h  | 1.25E-03  | 2.39E-02 | 1.93E-03 | 1.50E-04 | 1.50E-04 |
| 12h | 1.06E-04  | 1.66E-03 | 7.78E-04 | 5.76E-05 | 5.76E-05 |
| 24h | 3.42E-04  | 1.34E-03 | 7.40E-04 | 6.14E-04 | 6.14E-04 |
| 36h | 3.36E-04  | 2.59E-03 | 5.72E-04 | 4.03E-05 | 4.03E-05 |
| 48h | 4.39E-04  | 1.17E-03 | 3.45E-04 | 1.93E-04 | 1.93E-04 |
| 72h | 1.25E-03  | 7.51E-04 | 5.05E-04 | 4.68E-04 | 4.68E-04 |
|     | cgd8_2400 |          |          |          |          |
| 2h  | 0.00E+00  | 0.00E+00 | 0.00E+00 | 0.00E+00 | 0.00E+00 |
| 6h  | 0.00E+00  | 2.91E-09 | 0.00E+00 | 0.00E+00 | 0.00E+00 |
| 12h | 1.77E-06  | 5.25E-06 | 1.65E-06 | 1.87E-06 | 1.87E-06 |
| 24h | 5.25E-07  | 7.02E-07 | 1.68E-07 | 1.39E-07 | 1.39E-07 |
| 36h | 5.23E-07  | 2.80E-07 | 1.18E-06 | 1.65E-06 | 1.65E-06 |
| 48h | 4.23E-07  | 2.19E-07 | 1.56E-07 | 8.46E-07 | 8.46E-07 |
| 72h | 5.77E-07  | 2.41E-07 | 1.94E-07 | 5.76E-07 | 5.76E-07 |
|     | cgd8_250  |          |          |          |          |
| 2h  | 5.69E-06  | 2.60E-06 | 9.07E-07 | 7.74E-06 | 7.74E-06 |
| 6h  | 2.87E-06  | 2.09E-05 | 1.80E-05 | 2.89E-05 | 2.89E-05 |
| 12h | 5.21E-07  | 8.36E-07 | 2.60E-06 | 1.67E-06 | 1.67E-06 |
| 24h | 4.70E-06  | 5.64E-06 | 4.08E-05 | 1.26E-05 | 1.26E-05 |

|     |           |          |          |          |
|-----|-----------|----------|----------|----------|
| 36h | 9.99E-06  | 9.17E-06 | 4.26E-06 | 5.60E-06 |
| 48h | 5.90E-06  | 3.99E-06 | 4.19E-06 | 6.20E-06 |
| 72h | 2.49E-06  | 2.62E-06 | 1.37E-06 | 1.48E-06 |
|     | cgd8_2570 |          |          |          |
| 2h  | 0.00E+00  | 4.09E-03 | 6.79E-05 | 0.00E+00 |
| 6h  | 2.69E-05  | 9.96E-03 | 2.17E-04 | 1.04E-05 |
| 12h | 8.93E-06  | 0.00E+00 | 3.62E-05 | 1.07E-05 |
| 24h | 1.86E-05  | 8.35E-04 | 1.99E-04 | 4.62E-05 |
| 36h | 5.63E-05  | 8.58E-04 | 1.68E-04 | 5.47E-05 |
| 48h | 1.77E-04  | 1.87E-03 | 3.57E-05 | 1.85E-05 |
| 72h | 1.71E-04  | 2.39E-03 | 5.30E-05 | 3.25E-05 |
|     | cgd8_2590 |          |          |          |
| 2h  | 0.00E+00  | 0.00E+00 | 0.00E+00 | 0.00E+00 |
| 6h  | 2.08E-06  | 0.00E+00 | 0.00E+00 | 0.00E+00 |
| 12h | 1.81E-06  | 7.04E-07 | 3.43E-07 | 5.54E-07 |
| 24h | 2.39E-06  | 5.03E-04 | 5.76E-07 | 7.02E-07 |
| 36h | 3.67E-06  | 2.06E-03 | 2.62E-06 | 2.80E-06 |
| 48h | 5.50E-06  | 4.42E-03 | 2.76E-06 | 6.72E-07 |
| 72h | 2.12E-06  | 1.91E-03 | 2.33E-06 | 3.62E-06 |
|     | cgd8_2600 |          |          |          |
| 2h  | 0.00E+00  | 0.00E+00 | 1.26E-07 | 2.56E-07 |
| 6h  | 6.30E-08  | 6.35E-06 | 6.51E-07 | 2.92E-06 |
| 12h | 3.20E-07  | 8.73E-07 | 3.60E-07 | 5.35E-05 |
| 24h | 1.99E-07  | 1.84E-07 | 2.36E-06 | 1.27E-06 |
| 36h | 1.89E-06  | 2.04E-06 | 5.94E-06 | 3.52E-06 |
| 48h | 2.45E-06  | 2.09E-06 | 3.30E-06 | 7.03E-06 |
| 72h | 2.38E-07  | 2.35E-07 | 7.01E-07 | 1.28E-06 |
|     | cgd8_2610 |          |          |          |
| 2h  | 0.00E+00  | 0.00E+00 | 0.00E+00 | 0.00E+00 |
| 6h  | 0.00E+00  | 0.00E+00 | 0.00E+00 | 0.00E+00 |
| 12h | 3.06E-05  | 3.15E-06 | 2.72E-06 | 0.00E+00 |
| 24h | 9.56E-06  | 1.15E-06 | 1.89E-06 | 0.00E+00 |
| 36h | 5.69E-05  | 3.75E-06 | 7.17E-06 | 0.00E+00 |
| 48h | 2.77E-05  | 6.97E-06 | 6.12E-06 | 0.00E+00 |
| 72h | 2.82E-05  | 3.63E-06 | 1.58E-06 | 0.00E+00 |
|     | cgd8_2680 |          |          |          |
| 2h  | 8.20E-07  | 5.89E-09 | 0.00E+00 | 2.21E-08 |
| 6h  | 1.98E-08  | 2.42E-08 | 0.00E+00 | 0.00E+00 |
| 12h | 6.22E-08  | 5.05E-08 | 1.12E-07 | 6.46E-08 |
| 24h | 9.05E-07  | 1.67E-07 | 4.51E-08 | 3.39E-08 |
| 36h | 2.55E-07  | 2.33E-07 | 1.02E-07 | 5.22E-08 |
| 48h | 7.82E-06  | 2.23E-06 | 1.49E-06 | 1.15E-06 |
| 72h | 4.25E-07  | 1.77E-07 | 4.15E-08 | 6.92E-08 |
|     | cgd8_2690 |          |          |          |
| 2h  | 1.30E-05  | 6.88E-06 | 1.97E-07 | 9.56E-05 |
| 6h  | 4.50E-06  | 2.47E-07 | 6.08E-06 | 1.15E-07 |
| 12h | 2.51E-06  | 3.27E-05 | 1.18E-04 | 1.86E-05 |
| 24h | 7.04E-06  | 1.05E-04 | 2.86E-04 | 7.24E-05 |
| 36h | 1.75E-06  | 1.43E-04 | 8.97E-05 | 6.42E-05 |
| 48h | 3.11E-06  | 4.68E-05 | 7.03E-06 | 1.27E-04 |
| 72h | 9.72E-06  | 1.02E-04 | 8.59E-05 | 1.55E-05 |
|     | cgd8_2740 |          |          |          |
| 2h  | 0.00E+00  | 0.00E+00 | 0.00E+00 | 0.00E+00 |

|           |          |          |          |          |
|-----------|----------|----------|----------|----------|
| 6h        | 0.00E+00 | 0.00E+00 | 4.29E-09 | 0.00E+00 |
| 12h       | 4.47E-06 | 4.65E-06 | 4.61E-06 | 1.02E-06 |
| 24h       | 2.41E-06 | 5.24E-07 | 7.60E-07 | 3.13E-07 |
| 36h       | 3.77E-06 | 1.48E-06 | 4.14E-06 | 3.12E-06 |
| 48h       | 2.62E-06 | 2.69E-07 | 4.16E-07 | 3.05E-07 |
| 72h       | 7.69E-06 | 3.79E-06 | 3.35E-06 | 1.91E-06 |
| cgd8_2900 |          |          |          |          |
| 2h        | 1.45E-05 | 0.00E+00 | 2.71E-08 | 0.00E+00 |
| 6h        | 0.00E+00 | 1.25E-07 | 1.12E-07 | 8.14E-08 |
| 12h       | 3.65E-06 | 3.05E-07 | 1.18E-07 | 1.17E-07 |
| 24h       | 3.27E-06 | 2.04E-07 | 5.57E-07 | 1.27E-07 |
| 36h       | 4.83E-06 | 7.51E-07 | 1.14E-06 | 6.14E-07 |
| 48h       | 1.81E-05 | 7.24E-07 | 7.96E-07 | 5.84E-07 |
| 72h       | 6.78E-06 | 6.21E-07 | 3.38E-07 | 1.29E-06 |
| cgd8_2920 |          |          |          |          |
| 2h        | 5.61E-05 | 2.46E-07 | 3.33E-07 | 0.00E+00 |
| 6h        | 1.38E-04 | 1.32E-04 | 9.15E-05 | 6.74E-05 |
| 12h       | 2.45E-05 | 6.36E-05 | 6.16E-05 | 2.21E-05 |
| 24h       | 3.68E-05 | 5.19E-05 | 3.29E-04 | 1.31E-04 |
| 36h       | 5.24E-05 | 1.08E-04 | 2.26E-04 | 1.06E-04 |
| 48h       | 4.99E-05 | 1.44E-04 | 2.04E-04 | 1.31E-04 |
| 72h       | 3.84E-05 | 4.09E-05 | 5.24E-05 | 1.15E-05 |
| cgd8_300  |          |          |          |          |
| 2h        | 3.21E-05 | 4.82E-06 | 3.98E-06 | 2.94E-03 |
| 6h        | 2.73E-05 | 2.10E-06 | 3.01E-06 | 5.34E-06 |
| 12h       | 2.35E-05 | 1.56E-05 | 1.48E-05 | 9.58E-06 |
| 24h       | 3.11E-05 | 1.36E-05 | 9.42E-06 | 6.97E-06 |
| 36h       | 9.10E-06 | 4.01E-06 | 5.66E-06 | 5.30E-06 |
| 48h       | 8.46E-06 | 2.12E-06 | 2.30E-06 | 2.74E-06 |
| 72h       | 5.26E-06 | 1.08E-06 | 1.52E-06 | 5.55E-07 |
| cgd8_3010 |          |          |          |          |
| 2h        | 0.00E+00 | 2.41E-09 | 0.00E+00 | 0.00E+00 |
| 6h        | 1.33E-06 | 1.23E-06 | 4.35E-07 | 5.25E-07 |
| 12h       | 2.04E-07 | 1.51E-07 | 5.01E-07 | 1.15E-07 |
| 24h       | 8.80E-07 | 7.08E-07 | 9.73E-07 | 6.07E-07 |
| 36h       | 9.85E-07 | 7.05E-07 | 1.05E-06 | 7.55E-07 |
| 48h       | 2.16E-06 | 9.85E-07 | 6.21E-07 | 6.21E-07 |
| 72h       | 2.21E-07 | 9.97E-08 | 9.99E-08 | 5.38E-08 |
| cgd8_320  |          |          |          |          |
| 2h        | 3.54E-06 | 1.06E-07 | 0.00E+00 | 1.76E-08 |
| 6h        | 2.45E-07 | 9.02E-09 | 4.33E-08 | 1.62E-08 |
| 12h       | 1.30E-04 | 9.59E-05 | 4.77E-05 | 9.91E-06 |
| 24h       | 1.43E-05 | 1.59E-05 | 5.02E-06 | 3.70E-06 |
| 36h       | 1.05E-05 | 2.54E-06 | 1.17E-05 | 6.19E-06 |
| 48h       | 8.90E-06 | 1.02E-06 | 1.16E-06 | 1.19E-06 |
| 72h       | 3.64E-06 | 5.08E-07 | 5.27E-07 | 3.95E-07 |
| cgd8_330  |          |          |          |          |
| 2h        | 2.11E-05 | 8.68E-08 | 2.82E-08 | 6.78E-08 |
| 6h        | 2.12E-05 | 7.81E-08 | 0.00E+00 | 5.03E-08 |
| 12h       | 2.41E-04 | 2.73E-05 | 1.96E-05 | 3.25E-06 |
| 24h       | 6.43E-05 | 7.71E-06 | 3.96E-06 | 1.89E-06 |
| 36h       | 8.50E-05 | 7.09E-06 | 1.61E-05 | 5.67E-06 |
| 48h       | 1.55E-04 | 2.93E-06 | 5.33E-06 | 2.30E-06 |

|     |           |          |          |          |
|-----|-----------|----------|----------|----------|
| 72h | 1.43E-04  | 3.84E-06 | 3.17E-06 | 1.74E-06 |
|     | cgd8_3340 |          |          |          |
| 2h  | 6.33E-06  | 2.34E-04 | 7.83E-04 | 4.26E-05 |
| 6h  | 8.46E-06  | 4.57E-05 | 2.35E-04 | 4.46E-04 |
| 12h | 7.71E-06  | 6.41E-05 | 1.18E-04 | 1.94E-04 |
| 24h | 6.41E-06  | 1.23E-04 | 1.76E-04 | 4.61E-04 |
| 36h | 3.75E-06  | 3.30E-05 | 1.28E-04 | 4.28E-05 |
| 48h | 2.70E-06  | 4.10E-05 | 2.93E-05 | 3.84E-05 |
| 72h | 2.05E-06  | 4.55E-05 | 7.36E-05 | 8.71E-05 |
|     | cgd8_3400 |          |          |          |
| 2h  | 3.17E-04  | 8.76E-06 | 1.04E-05 | 4.61E-06 |
| 6h  | 2.88E-04  | 8.65E-06 | 4.98E-06 | 2.33E-06 |
| 12h | 2.10E-04  | 9.39E-06 | 5.14E-05 | 9.97E-06 |
| 24h | 5.11E-04  | 9.01E-05 | 2.42E-05 | 9.47E-06 |
| 36h | 6.61E-05  | 2.62E-05 | 2.42E-05 | 1.00E-04 |
| 48h | 1.67E-04  | 1.35E-05 | 2.06E-05 | 4.76E-05 |
| 72h | 1.09E-04  | 8.67E-06 | 4.87E-06 | 3.06E-05 |
|     | cgd8_3550 |          |          |          |
| 2h  | 4.80E-04  | 6.12E-05 | 1.02E-04 | 7.75E-05 |
| 6h  | 2.25E-04  | 1.92E-05 | 8.98E-06 | 4.12E-05 |
| 12h | 6.18E-04  | 4.78E-05 | 2.41E-04 | 1.46E-04 |
| 24h | 7.22E-04  | 6.09E-05 | 4.14E-05 | 2.33E-05 |
| 36h | 1.35E-04  | 2.81E-05 | 9.13E-05 | 4.23E-05 |
| 48h | 2.85E-04  | 8.87E-06 | 4.31E-05 | 1.96E-05 |
| 72h | 7.24E-05  | 8.24E-06 | 1.47E-05 | 5.12E-06 |
|     | cgd8_3570 |          |          |          |
| 2h  | 1.44E-07  | 1.62E-06 | 2.75E-08 | 1.70E-06 |
| 6h  | 1.75E-07  | 2.58E-07 | 8.26E-08 | 1.20E-06 |
| 12h | 5.38E-06  | 1.84E-05 | 2.09E-05 | 2.93E-05 |
| 24h | 1.73E-06  | 2.02E-05 | 3.03E-06 | 4.22E-06 |
| 36h | 3.98E-07  | 1.82E-06 | 6.60E-06 | 1.22E-05 |
| 48h | 9.03E-07  | 9.38E-07 | 9.71E-07 | 1.86E-06 |
| 72h | 3.43E-07  | 7.63E-07 | 5.44E-07 | 1.51E-06 |
|     | cgd8_3630 |          |          |          |
| 2h  | 1.41E-06  | 2.59E-06 | 2.25E-06 | 5.96E-06 |
| 6h  | 2.76E-07  | 5.20E-07 | 1.17E-07 | 9.60E-07 |
| 12h | 1.38E-07  | 4.04E-07 | 3.52E-07 | 1.59E-06 |
| 24h | 4.63E-07  | 2.18E-06 | 9.95E-07 | 1.13E-06 |
| 36h | 4.46E-07  | 1.42E-06 | 1.49E-06 | 2.99E-06 |
| 48h | 1.32E-06  | 9.84E-07 | 1.70E-06 | 1.57E-06 |
| 72h | 3.92E-07  | 4.38E-07 | 1.06E-06 | 1.20E-06 |
|     | cgd8_370  |          |          |          |
| 2h  | 0.00E+00  | 0.00E+00 | 0.00E+00 | 2.25E-06 |
| 6h  | 1.12E-05  | 1.27E-05 | 2.22E-05 | 6.18E-06 |
| 12h | 1.04E-05  | 2.06E-05 | 1.62E-04 | 2.61E-05 |
| 24h | 4.12E-05  | 6.28E-05 | 1.12E-04 | 6.29E-05 |
| 36h | 1.58E-04  | 9.86E-05 | 1.04E-04 | 2.61E-05 |
| 48h | 1.62E-04  | 6.73E-05 | 1.38E-04 | 3.60E-05 |
| 72h | 1.90E-04  | 6.53E-05 | 1.70E-04 | 1.13E-05 |
|     | cgd8_3700 |          |          |          |
| 2h  | 6.67E-07  | 2.20E-06 | 6.45E-07 | 3.16E-06 |
| 6h  | 1.54E-08  | 2.36E-06 | 1.73E-06 | 3.06E-06 |
| 12h | 1.64E-07  | 1.01E-06 | 2.00E-06 | 2.53E-06 |

|     |           |          |          |          |
|-----|-----------|----------|----------|----------|
| 24h | 9.16E-07  | 2.44E-06 | 5.46E-06 | 1.47E-06 |
| 36h | 1.34E-07  | 1.29E-06 | 1.04E-06 | 2.04E-06 |
| 48h | 5.05E-07  | 4.31E-07 | 2.90E-07 | 8.01E-07 |
| 72h | 1.84E-07  | 2.04E-07 | 2.17E-07 | 5.56E-07 |
|     | cgd8_3810 |          |          |          |
| 2h  | 4.14E-05  | 2.33E-04 | 1.03E-04 | 8.80E-04 |
| 6h  | 6.83E-06  | 8.00E-05 | 2.67E-05 | 2.19E-04 |
| 12h | 9.13E-06  | 3.02E-05 | 7.24E-05 | 1.72E-04 |
| 24h | 2.53E-05  | 1.19E-04 | 4.22E-05 | 1.23E-04 |
| 36h | 8.07E-06  | 5.34E-05 | 3.56E-05 | 9.90E-05 |
| 48h | 1.15E-05  | 2.28E-05 | 3.52E-05 | 1.45E-04 |
| 72h | 6.80E-06  | 1.18E-05 | 3.29E-05 | 2.85E-05 |
|     | cgd8_390  |          |          |          |
| 2h  | 8.31E-07  | 3.76E-06 | 2.43E-06 | 1.30E-05 |
| 6h  | 6.70E-07  | 2.08E-06 | 1.51E-06 | 5.96E-06 |
| 12h | 6.93E-07  | 3.67E-07 | 5.57E-06 | 6.33E-06 |
| 24h | 9.92E-07  | 5.68E-06 | 1.11E-06 | 3.52E-06 |
| 36h | 1.12E-06  | 3.82E-06 | 1.72E-06 | 6.32E-06 |
| 48h | 3.78E-06  | 3.86E-06 | 6.58E-06 | 1.29E-05 |
| 72h | 4.30E-06  | 3.91E-06 | 5.02E-06 | 4.07E-06 |
|     | cgd8_3990 |          |          |          |
| 2h  | 0.00E+00  | 1.49E-06 | 0.00E+00 | 0.00E+00 |
| 6h  | 0.00E+00  | 0.00E+00 | 0.00E+00 | 0.00E+00 |
| 12h | 6.97E-06  | 2.59E-04 | 7.15E-05 | 6.25E-05 |
| 24h | 1.11E-06  | 1.62E-05 | 3.94E-06 | 1.91E-05 |
| 36h | 3.72E-06  | 3.56E-05 | 5.03E-05 | 1.28E-04 |
| 48h | 2.04E-06  | 1.58E-05 | 1.79E-05 | 1.86E-05 |
| 72h | 4.08E-06  | 2.95E-05 | 3.39E-05 | 1.43E-04 |
|     | cgd8_400  |          |          |          |
| 2h  | 2.48E-06  | 5.49E-06 | 1.68E-06 | 8.79E-06 |
| 6h  | 7.60E-06  | 1.25E-05 | 1.15E-05 | 1.79E-05 |
| 12h | 4.42E-07  | 2.13E-06 | 3.96E-06 | 4.83E-06 |
| 24h | 2.13E-06  | 8.38E-05 | 9.90E-06 | 1.56E-05 |
| 36h | 2.02E-06  | 3.01E-06 | 3.00E-06 | 2.65E-06 |
| 48h | 1.85E-06  | 2.73E-06 | 2.23E-06 | 6.18E-06 |
| 72h | 6.01E-07  | 1.18E-06 | 2.64E-06 | 1.54E-06 |
|     | cgd8_4060 |          |          |          |
| 2h  | 1.91E-09  | 2.29E-09 | 0.00E+00 | 9.24E-09 |
| 6h  | 3.51E-07  | 8.36E-07 | 1.11E-06 | 1.52E-06 |
| 12h | 8.54E-08  | 1.86E-07 | 1.01E-07 | 6.40E-08 |
| 24h | 5.84E-08  | 2.21E-07 | 3.16E-07 | 4.00E-07 |
| 36h | 2.82E-07  | 4.07E-07 | 2.21E-07 | 1.89E-07 |
| 48h | 2.27E-07  | 2.81E-07 | 2.60E-07 | 3.25E-07 |
| 72h | 2.08E-07  | 1.54E-07 | 4.74E-07 | 1.82E-07 |
|     | cgd8_4250 |          |          |          |
| 2h  | 0.00E+00  | 0.00E+00 | 0.00E+00 | 4.60E-08 |
| 6h  | 0.00E+00  | 1.92E-08 | 1.23E-08 | 4.41E-09 |
| 12h | 1.29E-08  | 0.00E+00 | 2.08E-09 | 3.17E-09 |
| 24h | 2.50E-08  | 6.08E-08 | 1.59E-07 | 3.24E-07 |
| 36h | 1.94E-07  | 3.23E-07 | 3.42E-07 | 3.60E-07 |
| 48h | 5.11E-07  | 6.75E-07 | 8.58E-07 | 3.42E-06 |
| 72h | 3.08E-07  | 3.85E-07 | 7.26E-07 | 7.13E-07 |
|     | cgd8_4310 |          |          |          |

|     |           |          |          |          |
|-----|-----------|----------|----------|----------|
| 2h  | 0.00E+00  | 0.00E+00 | 0.00E+00 | 0.00E+00 |
| 6h  | 0.00E+00  | 1.07E-06 | 2.59E-08 | 0.00E+00 |
| 12h | 0.00E+00  | 0.00E+00 | 2.65E-08 | 3.65E-08 |
| 24h | 1.04E-06  | 2.09E-05 | 9.04E-07 | 1.73E-06 |
| 36h | 4.92E-06  | 5.10E-05 | 8.37E-06 | 1.35E-05 |
| 48h | 1.39E-04  | 2.01E-04 | 2.67E-04 | 3.58E-04 |
| 72h | 1.23E-04  | 4.31E-04 | 2.45E-04 | 4.15E-04 |
|     | cgd8_4350 |          |          |          |
| 2h  | 6.36E-05  | 9.58E-05 | 4.61E-05 | 3.89E-05 |
| 6h  | 1.31E-04  | 1.58E-04 | 1.87E-04 | 1.66E-04 |
| 12h | 9.32E-06  | 1.47E-05 | 4.63E-05 | 1.93E-05 |
| 24h | 8.10E-05  | 3.22E-05 | 8.88E-05 | 5.37E-05 |
| 36h | 5.20E-05  | 3.40E-05 | 3.20E-05 | 1.88E-05 |
| 48h | 3.28E-05  | 1.90E-05 | 1.16E-05 | 9.14E-06 |
| 72h | 6.68E-06  | 4.44E-06 | 6.48E-06 | 8.46E-06 |
|     | cgd8_440  |          |          |          |
| 2h  | 4.50E-05  | 7.86E-05 | 1.61E-05 | 6.39E-05 |
| 6h  | 7.86E-05  | 1.38E-04 | 1.28E-04 | 1.30E-04 |
| 12h | 8.65E-06  | 1.98E-05 | 3.18E-05 | 2.35E-05 |
| 24h | 5.34E-05  | 5.25E-05 | 5.27E-05 | 4.72E-05 |
| 36h | 4.17E-05  | 4.80E-05 | 1.19E-05 | 2.20E-05 |
| 48h | 1.88E-05  | 1.12E-05 | 1.29E-05 | 7.36E-06 |
| 72h | 7.69E-06  | 1.05E-05 | 8.00E-06 | 1.19E-05 |
|     | cgd8_4510 |          |          |          |
| 2h  | 6.42E-03  | 6.14E-03 | 1.38E-04 | 1.47E-03 |
| 6h  | 1.76E-03  | 3.66E-03 | 3.48E-04 | 4.30E-03 |
| 12h | 2.71E-04  | 4.73E-04 | 1.93E-04 | 2.62E-04 |
| 24h | 7.81E-04  | 1.43E-03 | 2.89E-04 | 7.20E-04 |
| 36h | 7.47E-04  | 5.73E-04 | 1.10E-04 | 1.09E-03 |
| 48h | 2.88E-04  | 3.31E-04 | 4.08E-05 | 6.94E-04 |
| 72h | 1.91E-04  | 1.28E-04 | 1.96E-05 | 3.47E-04 |
|     | cgd8_4560 |          |          |          |
| 2h  | 2.01E-04  | 2.82E-06 | 0.00E+00 | 9.11E-05 |
| 6h  | 1.10E-03  | 4.62E-04 | 7.57E-05 | 3.99E-04 |
| 12h | 2.08E-04  | 3.35E-04 | 7.45E-05 | 9.77E-05 |
| 24h | 1.05E-04  | 1.23E-04 | 8.14E-05 | 2.03E-04 |
| 36h | 1.28E-04  | 3.72E-04 | 7.46E-05 | 2.44E-04 |
| 48h | 3.51E-04  | 5.72E-05 | 2.23E-05 | 4.89E-05 |
| 72h | 9.59E-05  | 7.32E-05 | 1.15E-05 | 4.34E-05 |
|     | cgd8_4580 |          |          |          |
| 2h  | 0.00E+00  | 0.00E+00 | 0.00E+00 | 0.00E+00 |
| 6h  | 0.00E+00  | 0.00E+00 | 0.00E+00 | 0.00E+00 |
| 12h | 4.94E-05  | 5.30E-05 | 1.92E-04 | 4.86E-06 |
| 24h | 2.84E-05  | 8.91E-06 | 7.23E-05 | 1.95E-06 |
| 36h | 3.79E-05  | 3.05E-05 | 7.34E-05 | 1.38E-05 |
| 48h | 2.27E-05  | 7.89E-06 | 7.61E-05 | 1.52E-06 |
| 72h | 2.59E-05  | 2.14E-06 | 7.08E-05 | 7.38E-06 |
|     | cgd8_4600 |          |          |          |
| 2h  | 5.76E-09  | 7.63E-09 | 7.40E-09 | 1.92E-08 |
| 6h  | 2.16E-09  | 4.77E-08 | 3.01E-08 | 1.23E-07 |
| 12h | 3.02E-08  | 7.22E-08 | 4.38E-08 | 3.71E-08 |
| 24h | 7.10E-08  | 5.75E-08 | 1.39E-07 | 7.93E-08 |
| 36h | 2.85E-07  | 1.33E-07 | 3.95E-07 | 2.76E-07 |



|     |           |          |          |          |
|-----|-----------|----------|----------|----------|
| 48h | 1.37E-07  | 7.58E-08 | 1.09E-07 | 3.54E-07 |
| 72h | 2.01E-07  | 1.27E-07 | 1.26E-07 | 1.87E-07 |
|     | cgd8_4610 |          |          |          |
| 2h  | 2.07E-08  | 0.00E+00 | 3.42E-08 | 1.15E-07 |
| 6h  | 1.66E-08  | 0.00E+00 | 0.00E+00 | 0.00E+00 |
| 12h | 7.63E-08  | 0.00E+00 | 0.00E+00 | 1.61E-07 |
| 24h | 1.16E-08  | 2.84E-09 | 3.87E-08 | 1.56E-08 |
| 36h | 1.79E-07  | 1.78E-07 | 1.35E-07 | 1.54E-07 |
| 48h | 4.83E-07  | 2.26E-07 | 8.44E-08 | 8.25E-07 |
| 72h | 1.25E-06  | 5.39E-07 | 7.60E-07 | 1.12E-06 |
|     | cgd8_4670 |          |          |          |
| 2h  | 1.51E-04  | 1.11E-04 | 1.40E-03 | 4.24E-05 |
| 6h  | 5.34E-05  | 2.40E-05 | 5.66E-04 | 3.75E-05 |
| 12h | 7.74E-06  | 6.24E-06 | 4.79E-05 | 5.83E-06 |
| 24h | 4.39E-05  | 2.40E-05 | 1.21E-04 | 8.09E-06 |
| 36h | 1.01E-05  | 4.05E-06 | 7.77E-05 | 1.30E-05 |
| 48h | 1.37E-05  | 1.58E-05 | 5.44E-05 | 5.27E-06 |
| 72h | 8.68E-06  | 5.80E-06 | 6.96E-05 | 3.81E-06 |
|     | cgd8_4680 |          |          |          |
| 2h  | 2.43E-06  | 2.93E-06 | 1.93E-06 | 7.42E-06 |
| 6h  | 2.88E-07  | 6.24E-07 | 1.16E-07 | 5.17E-07 |
| 12h | 8.66E-07  | 1.20E-06 | 1.60E-06 | 1.68E-06 |
| 24h | 2.45E-06  | 1.55E-06 | 1.46E-06 | 1.89E-06 |
| 36h | 1.24E-06  | 6.48E-07 | 7.76E-07 | 1.32E-06 |
| 48h | 6.50E-07  | 4.31E-07 | 7.26E-07 | 1.57E-06 |
| 72h | 7.78E-07  | 3.77E-07 | 3.58E-07 | 5.42E-07 |
|     | cgd8_4690 |          |          |          |
| 2h  | 0.00E+00  | 0.00E+00 | 0.00E+00 | 0.00E+00 |
| 6h  | 0.00E+00  | 0.00E+00 | 0.00E+00 | 0.00E+00 |
| 12h | 1.06E-07  | 3.22E-07 | 2.90E-07 | 2.17E-07 |
| 24h | 1.40E-07  | 1.46E-07 | 9.51E-08 | 7.22E-08 |
| 36h | 1.74E-07  | 1.15E-07 | 3.84E-07 | 4.29E-07 |
| 48h | 6.32E-07  | 3.68E-07 | 9.23E-07 | 1.33E-06 |
| 72h | 1.46E-06  | 6.33E-07 | 9.60E-07 | 1.40E-06 |
|     | cgd8_4700 |          |          |          |
| 2h  | 1.46E-05  | 4.70E-05 | 6.73E-07 | 0.00E+00 |
| 6h  | 4.22E-06  | 1.95E-05 | 0.00E+00 | 3.18E-05 |
| 12h | 0.00E+00  | 0.00E+00 | 3.79E-07 | 1.07E-06 |
| 24h | 7.20E-07  | 1.65E-06 | 1.29E-08 | 2.19E-06 |
| 36h | 1.63E-05  | 3.72E-05 | 5.04E-06 | 3.64E-05 |
| 48h | 8.14E-05  | 3.72E-05 | 1.04E-06 | 5.09E-06 |
| 72h | 3.87E-06  | 2.11E-05 | 1.26E-05 | 6.85E-06 |
|     | cgd8_4720 |          |          |          |
| 2h  | 1.57E-05  | 1.26E-05 | 5.66E-06 | 5.16E-06 |
| 6h  | 9.54E-05  | 1.49E-04 | 7.38E-05 | 5.56E-05 |
| 12h | 3.07E-06  | 7.50E-06 | 6.29E-06 | 2.45E-06 |
| 24h | 2.25E-05  | 4.04E-05 | 5.84E-05 | 4.37E-05 |
| 36h | 3.76E-05  | 2.16E-05 | 9.80E-06 | 1.17E-05 |
| 48h | 1.99E-05  | 1.43E-05 | 1.90E-05 | 9.99E-06 |
| 72h | 7.70E-06  | 5.86E-06 | 8.83E-06 | 7.30E-07 |
|     | cgd8_4750 |          |          |          |
| 2h  | 1.55E-03  | 1.06E-04 | 3.97E-05 | 1.02E-04 |
| 6h  | 1.75E-04  | 2.47E-05 | 3.51E-05 | 3.76E-05 |

|     |          |          |          |          |
|-----|----------|----------|----------|----------|
| 12h | 5.24E-05 | 2.24E-05 | 6.77E-05 | 1.56E-05 |
| 24h | 3.15E-04 | 1.89E-04 | 2.65E-04 | 7.46E-05 |
| 36h | 1.10E-04 | 3.99E-05 | 3.29E-05 | 1.63E-05 |
| 48h | 9.41E-05 | 3.91E-05 | 9.50E-05 | 3.78E-05 |
| 72h | 5.37E-05 | 1.41E-05 | 1.27E-05 | 5.98E-06 |
|     | cgd8_500 |          |          |          |
| 2h  | 0.00E+00 | 0.00E+00 | 8.72E-09 | 0.00E+00 |
| 6h  | 0.00E+00 | 0.00E+00 | 1.71E-09 | 0.00E+00 |
| 12h | 5.52E-06 | 2.92E-05 | 3.30E-06 | 1.37E-06 |
| 24h | 7.93E-07 | 1.54E-06 | 6.65E-07 | 3.28E-07 |
| 36h | 1.43E-06 | 1.05E-06 | 1.48E-06 | 1.11E-06 |
| 48h | 7.73E-07 | 6.32E-07 | 5.06E-07 | 3.91E-07 |
| 72h | 3.40E-07 | 4.41E-07 | 4.23E-07 | 2.57E-07 |
|     | cgd8_520 |          |          |          |
| 2h  | 0.00E+00 | 0.00E+00 | 0.00E+00 | 0.00E+00 |
| 6h  | 0.00E+00 | 5.48E-08 | 0.00E+00 | 0.00E+00 |
| 12h | 4.10E-04 | 6.88E-04 | 9.50E-05 | 5.22E-05 |
| 24h | 1.02E-04 | 4.76E-05 | 1.36E-05 | 5.46E-06 |
| 36h | 3.38E-05 | 2.60E-05 | 9.34E-05 | 3.07E-05 |
| 48h | 3.75E-05 | 1.09E-05 | 1.86E-05 | 1.12E-05 |
| 72h | 2.04E-05 | 9.01E-06 | 2.31E-05 | 2.48E-06 |
|     | cgd8_540 |          |          |          |
| 2h  | 0.00E+00 | 0.00E+00 | 0.00E+00 | 0.00E+00 |
| 6h  | 0.00E+00 | 0.00E+00 | 0.00E+00 | 0.00E+00 |
| 12h | 2.66E-03 | 1.25E-03 | 7.13E-04 | 1.34E-04 |
| 24h | 2.41E-04 | 5.02E-04 | 2.86E-04 | 1.04E-04 |
| 36h | 1.84E-04 | 3.83E-04 | 7.74E-04 | 3.78E-04 |
| 48h | 1.73E-04 | 2.68E-04 | 3.65E-04 | 2.57E-04 |
| 72h | 1.87E-03 | 3.88E-04 | 2.13E-03 | 2.10E-04 |
|     | cgd8_550 |          |          |          |
| 2h  | 2.49E-06 | 2.28E-06 | 2.77E-08 | 6.54E-07 |
| 6h  | 2.20E-05 | 1.02E-05 | 2.60E-05 | 1.12E-05 |
| 12h | 1.07E-06 | 1.57E-06 | 5.02E-06 | 1.74E-06 |
| 24h | 3.89E-06 | 2.56E-06 | 1.54E-05 | 4.63E-06 |
| 36h | 6.06E-06 | 1.03E-05 | 4.58E-06 | 3.50E-06 |
| 48h | 4.24E-06 | 1.90E-06 | 3.29E-06 | 2.91E-06 |
| 72h | 3.53E-06 | 1.60E-06 | 2.83E-06 | 3.28E-07 |
|     | cgd8_560 |          |          |          |
| 2h  | 2.74E-07 | 1.39E-07 | 2.03E-07 | 1.53E-07 |
| 6h  | 5.14E-07 | 5.94E-07 | 2.85E-07 | 1.24E-07 |
| 12h | 8.39E-08 | 1.19E-07 | 8.27E-08 | 4.46E-08 |
| 24h | 2.39E-07 | 3.42E-07 | 1.76E-07 | 1.64E-07 |
| 36h | 4.11E-07 | 2.88E-07 | 2.96E-07 | 2.82E-07 |
| 48h | 4.51E-07 | 4.48E-07 | 4.25E-07 | 3.77E-07 |
| 72h | 4.39E-07 | 4.14E-07 | 8.96E-07 | 4.40E-07 |
|     | cgd8_580 |          |          |          |
| 2h  | 7.81E-07 | 7.62E-07 | 1.04E-06 | 4.98E-07 |
| 6h  | 3.08E-06 | 3.10E-06 | 3.82E-06 | 1.58E-06 |
| 12h | 4.85E-07 | 7.62E-07 | 1.04E-06 | 5.04E-07 |
| 24h | 1.03E-06 | 1.67E-06 | 2.25E-06 | 1.66E-06 |
| 36h | 3.80E-06 | 1.39E-06 | 2.88E-06 | 1.56E-06 |
| 48h | 3.04E-06 | 2.93E-06 | 2.61E-06 | 1.90E-06 |
| 72h | 1.02E-06 | 5.11E-07 | 1.75E-06 | 8.56E-07 |

|     |           |          |          |          |
|-----|-----------|----------|----------|----------|
|     | cgd8_650  |          |          |          |
| 2h  | 9.27E-06  | 1.20E-05 | 3.82E-06 | 5.22E-06 |
| 6h  | 3.83E-05  | 2.72E-05 | 2.84E-05 | 2.55E-05 |
| 12h | 2.83E-06  | 1.64E-06 | 1.61E-05 | 2.55E-06 |
| 24h | 1.09E-05  | 1.05E-05 | 1.54E-05 | 8.15E-06 |
| 36h | 1.05E-05  | 5.84E-06 | 7.43E-06 | 1.86E-06 |
| 48h | 2.06E-06  | 3.01E-06 | 2.75E-06 | 1.11E-06 |
| 72h | 7.81E-07  | 7.13E-07 | 7.81E-07 | 2.16E-07 |
|     | cgd8_670  |          |          |          |
| 2h  | 0.00E+00  | 0.00E+00 | 0.00E+00 | 0.00E+00 |
| 6h  | 0.00E+00  | 0.00E+00 | 0.00E+00 | 0.00E+00 |
| 12h | 9.82E-05  | 3.15E-05 | 5.43E-05 | 1.24E-05 |
| 24h | 6.36E-05  | 2.07E-05 | 1.48E-05 | 4.33E-06 |
| 36h | 7.87E-05  | 2.02E-05 | 4.59E-05 | 2.14E-05 |
| 48h | 3.38E-05  | 9.36E-06 | 4.11E-05 | 2.42E-05 |
| 72h | 1.14E-05  | 2.59E-06 | 6.93E-06 | 2.57E-06 |
|     | cgd8_680  |          |          |          |
| 2h  | 0.00E+00  | 0.00E+00 | 0.00E+00 | 0.00E+00 |
| 6h  | 0.00E+00  | 7.76E-10 | 0.00E+00 | 0.00E+00 |
| 12h | 2.12E-04  | 1.05E-04 | 8.61E-05 | 4.41E-05 |
| 24h | 2.56E-05  | 4.77E-05 | 1.31E-05 | 1.94E-05 |
| 36h | 1.13E-04  | 3.95E-05 | 9.91E-05 | 7.84E-05 |
| 48h | 7.39E-05  | 2.35E-05 | 2.39E-05 | 1.03E-04 |
| 72h | 1.77E-05  | 5.39E-06 | 1.08E-05 | 5.34E-06 |
|     | cgd8_700  |          |          |          |
| 2h  | 2.63E-09  | 0.00E+00 | 0.00E+00 | 0.00E+00 |
| 6h  | 0.00E+00  | 0.00E+00 | 0.00E+00 | 0.00E+00 |
| 12h | 5.34E-07  | 7.95E-07 | 5.09E-07 | 6.02E-08 |
| 24h | 1.73E-07  | 7.20E-07 | 1.11E-07 | 1.60E-08 |
| 36h | 5.42E-07  | 5.66E-07 | 3.84E-07 | 5.97E-07 |
| 48h | 1.26E-06  | 4.25E-07 | 4.79E-07 | 2.39E-07 |
| 72h | 2.27E-06  | 8.91E-07 | 6.69E-06 | 2.07E-06 |
|     | cgd4_1230 |          |          |          |
| 2h  | 7.29E-03  | 1.81E-05 | 5.41E-06 | 1.08E-05 |
| 6h  | 2.08E-04  | 3.52E-04 | 1.09E-04 | 8.67E-05 |
| 12h | 2.51E-06  | 8.51E-06 | 4.56E-05 | 1.52E-05 |
| 24h | 2.30E-05  | 2.40E-05 | 1.58E-04 | 4.51E-05 |
| 36h | 2.08E-05  | 1.13E-05 | 1.08E-05 | 1.97E-05 |
| 48h | 8.90E-06  | 1.35E-05 | 1.24E-05 | 8.53E-06 |
| 72h | 3.16E-06  | 9.32E-07 | 2.52E-06 | 1.82E-06 |
|     | cgd4_140  |          |          |          |
| 2h  | 3.35E-03  | 4.74E-07 | 8.67E-08 | 1.12E-06 |
| 6h  | 1.10E-07  | 2.38E-07 | 1.02E-07 | 2.56E-07 |
| 12h | 9.70E-09  | 3.21E-08 | 3.13E-08 | 8.21E-08 |
| 24h | 1.16E-07  | 1.18E-07 | 3.19E-07 | 3.22E-07 |
| 36h | 1.08E-07  | 2.15E-07 | 4.15E-08 | 2.17E-07 |
| 48h | 1.36E-07  | 9.39E-08 | 5.75E-08 | 1.50E-07 |
| 72h | 6.72E-08  | 4.69E-08 | 2.92E-08 | 5.16E-08 |
|     | cgd4_1590 |          |          |          |
| 2h  | 4.81E-03  | 5.38E-04 | 1.51E-05 | 1.50E-04 |
| 6h  | 2.08E-04  | 3.92E-04 | 7.69E-05 | 8.78E-05 |
| 12h | 1.68E-05  | 1.36E-04 | 4.95E-05 | 2.83E-05 |
| 24h | 2.17E-04  | 2.17E-04 | 1.10E-04 | 8.51E-05 |

|     |           |          |          |          |
|-----|-----------|----------|----------|----------|
| 36h | 7.58E-05  | 3.60E-04 | 7.11E-05 | 5.08E-05 |
| 48h | 1.27E-04  | 1.21E-04 | 3.19E-05 | 4.40E-05 |
| 72h | 7.34E-05  | 1.33E-04 | 1.01E-05 | 5.45E-06 |
|     | cgd4_1650 |          |          |          |
| 2h  | 0.00E+00  | 0.00E+00 | 0.00E+00 | 0.00E+00 |
| 6h  | 1.71E-06  | 2.05E-06 | 1.34E-06 | 7.86E-07 |
| 12h | 1.85E-07  | 1.67E-06 | 2.71E-07 | 2.67E-07 |
| 24h | 7.11E-07  | 2.41E-07 | 1.34E-06 | 5.66E-07 |
| 36h | 1.43E-06  | 1.07E-06 | 1.05E-06 | 1.03E-06 |
| 48h | 7.63E-07  | 9.06E-07 | 8.84E-07 | 3.43E-07 |
| 72h | 1.50E-07  | 2.21E-07 | 2.82E-07 | 1.25E-07 |
|     | cgd4_1700 |          |          |          |
| 2h  | 7.72E-04  | 8.14E-04 | 2.71E-05 | 1.18E-04 |
| 6h  | 5.30E-05  | 9.67E-05 | 1.25E-05 | 1.74E-05 |
| 12h | 2.91E-05  | 2.58E-04 | 5.01E-05 | 5.69E-05 |
| 24h | 2.24E-04  | 1.72E-04 | 6.86E-05 | 3.11E-05 |
| 36h | 7.18E-05  | 8.19E-05 | 3.57E-05 | 2.79E-05 |
| 48h | 5.09E-05  | 4.30E-05 | 5.84E-05 | 2.73E-05 |
| 72h | 3.37E-05  | 2.31E-05 | 5.29E-05 | 9.33E-06 |
|     | cgd4_1830 |          |          |          |
| 2h  | 1.97E-07  | 4.20E-07 | 1.00E-07 | 2.03E-07 |
| 6h  | 9.00E-08  | 1.23E-07 | 1.06E-07 | 1.15E-07 |
| 12h | 1.70E-07  | 1.27E-06 | 3.91E-07 | 3.59E-07 |
| 24h | 8.36E-07  | 4.62E-07 | 3.21E-07 | 2.03E-07 |
| 36h | 8.17E-07  | 8.75E-07 | 7.95E-07 | 9.07E-07 |
| 48h | 6.66E-07  | 6.40E-07 | 3.81E-07 | 3.87E-07 |
| 72h | 3.03E-07  | 3.28E-07 | 3.02E-07 | 1.07E-07 |
|     | cgd4_1940 |          |          |          |
| 2h  | 6.67E-05  | 9.98E-02 | 7.10E-04 | 2.72E-03 |
| 6h  | 1.28E-04  | 7.47E-01 | 1.47E-01 | 3.73E-02 |
| 12h | 4.81E-06  | 1.76E-01 | 2.08E-02 | 1.23E-03 |
| 24h | 6.91E-05  | 2.42E-02 | 2.63E-02 | 6.78E-03 |
| 36h | 3.13E-05  | 8.09E-02 | 2.03E-02 | 1.55E-03 |
| 48h | 1.06E-04  | 6.59E-02 | 2.21E-02 | 2.13E-05 |
| 72h | 3.54E-05  | 3.25E-02 | 2.10E-02 | 3.65E-03 |
|     | cgd4_2020 |          |          |          |
| 2h  | 6.47E-06  | 2.82E-06 | 6.80E-07 | 3.09E-06 |
| 6h  | 3.37E-07  | 8.23E-07 | 2.25E-07 | 6.41E-07 |
| 12h | 1.46E-07  | 3.16E-07 | 5.81E-07 | 5.08E-07 |
| 24h | 2.19E-06  | 1.15E-06 | 5.42E-07 | 9.85E-07 |
| 36h | 3.98E-07  | 9.11E-07 | 5.32E-07 | 1.11E-06 |
| 48h | 5.63E-07  | 5.71E-07 | 7.71E-07 | 1.23E-06 |
| 72h | 3.58E-07  | 6.13E-07 | 4.44E-07 | 2.21E-07 |
|     | cgd4_2040 |          |          |          |
| 2h  | 1.80E-06  | 4.83E-07 | 8.29E-07 | 6.31E-07 |
| 6h  | 1.34E-06  | 1.56E-06 | 5.91E-07 | 1.09E-06 |
| 12h | 3.05E-08  | 1.17E-07 | 5.04E-07 | 2.87E-07 |
| 24h | 5.74E-07  | 4.78E-07 | 7.02E-07 | 1.37E-06 |
| 36h | 3.13E-07  | 7.87E-07 | 4.24E-07 | 6.42E-07 |
| 48h | 3.70E-07  | 2.97E-07 | 4.92E-07 | 5.04E-07 |
| 72h | 1.62E-07  | 1.45E-07 | 1.25E-07 | 9.08E-08 |
|     | cgd4_2110 |          |          |          |
| 2h  | 0.00E+00  | 0.00E+00 | 0.00E+00 | 0.00E+00 |

|     |           |          |          |          |          |
|-----|-----------|----------|----------|----------|----------|
| 6h  |           | 1.85E-09 | 2.47E-09 | 3.77E-09 | 1.19E-08 |
| 12h |           | 1.69E-05 | 1.16E-04 | 9.14E-05 | 2.47E-05 |
| 24h |           | 6.56E-06 | 3.79E-06 | 5.49E-06 | 3.37E-06 |
| 36h |           | 1.56E-06 | 4.14E-06 | 1.92E-05 | 1.63E-05 |
| 48h |           | 6.46E-06 | 4.95E-06 | 9.58E-06 | 5.40E-06 |
| 72h |           | 5.33E-06 | 8.96E-06 | 4.43E-06 | 2.13E-06 |
|     | cgd4_2260 |          |          |          |          |
| 2h  |           | 2.42E-04 | 1.41E-03 | 1.66E-04 | 7.76E-05 |
| 6h  |           | 3.01E-04 | 6.42E-04 | 6.06E-04 | 3.78E-04 |
| 12h |           | 4.23E-05 | 3.07E-05 | 2.08E-04 | 7.46E-05 |
| 24h |           | 1.11E-04 | 7.51E-05 | 3.02E-04 | 1.66E-04 |
| 36h |           | 9.80E-05 | 1.61E-04 | 1.93E-04 | 1.28E-04 |
| 48h |           | 4.18E-05 | 5.62E-05 | 8.78E-05 | 3.01E-05 |
| 72h |           | 1.82E-05 | 2.24E-05 | 2.98E-05 | 1.74E-05 |
|     | cgd4_2270 |          |          |          |          |
| 2h  |           | 3.21E-05 | 9.30E-06 | 1.00E-06 | 1.48E-06 |
| 6h  |           | 5.00E-05 | 4.37E-06 | 7.65E-06 | 1.95E-04 |
| 12h |           | 2.48E-07 | 2.70E-07 | 2.15E-06 | 6.66E-06 |
| 24h |           | 4.69E-06 | 1.10E-06 | 3.61E-06 | 5.91E-06 |
| 36h |           | 1.15E-06 | 1.57E-06 | 2.07E-06 | 5.69E-06 |
| 48h |           | 1.22E-06 | 1.71E-06 | 1.54E-06 | 2.82E-06 |
| 72h |           | 2.04E-07 | 2.11E-07 | 2.27E-07 | 3.58E-07 |
|     | cgd4_2300 |          |          |          |          |
| 2h  |           | 0.00E+00 | 5.91E-09 | 0.00E+00 | 1.04E-08 |
| 6h  |           | 2.89E-06 | 6.23E-06 | 1.35E-05 | 4.08E-06 |
| 12h |           | 3.07E-06 | 1.24E-06 | 1.85E-06 | 1.46E-06 |
| 24h |           | 1.19E-06 | 1.74E-06 | 6.45E-06 | 4.48E-06 |
| 36h |           | 2.90E-06 | 4.14E-06 | 6.10E-06 | 3.06E-06 |
| 48h |           | 2.82E-06 | 4.89E-06 | 2.53E-06 | 2.13E-06 |
| 72h |           | 7.72E-07 | 1.26E-06 | 6.94E-07 | 1.32E-06 |
|     | cgd4_2350 |          |          |          |          |
| 2h  |           | 0.00E+00 | 0.00E+00 | 0.00E+00 | 0.00E+00 |
| 6h  |           | 2.25E-08 | 2.41E-08 | 3.83E-07 | 3.92E-07 |
| 12h |           | 6.10E-05 | 4.61E-04 | 8.90E-04 | 4.44E-04 |
| 24h |           | 1.77E-05 | 4.75E-05 | 5.88E-05 | 6.20E-05 |
| 36h |           | 2.06E-06 | 2.54E-05 | 9.86E-05 | 1.57E-04 |
| 48h |           | 1.50E-06 | 1.08E-05 | 1.20E-05 | 5.01E-05 |
| 72h |           | 6.41E-07 | 5.03E-06 | 7.30E-06 | 2.32E-05 |
|     | cgd4_2370 |          |          |          |          |
| 2h  |           | 1.82E-06 | 3.70E-06 | 3.08E-07 | 4.94E-07 |
| 6h  |           | 1.80E-05 | 2.24E-05 | 3.10E-05 | 5.08E-05 |
| 12h |           | 4.51E-07 | 9.40E-07 | 2.23E-06 | 1.49E-06 |
| 24h |           | 2.69E-06 | 2.23E-06 | 2.05E-05 | 1.67E-05 |
| 36h |           | 2.86E-06 | 3.49E-06 | 2.07E-06 | 2.92E-06 |
| 48h |           | 1.00E-06 | 1.27E-06 | 1.79E-06 | 1.51E-06 |
| 72h |           | 5.21E-07 | 1.35E-07 | 3.42E-07 | 3.85E-07 |
|     | cgd4_2400 |          |          |          |          |
| 2h  |           | 8.87E-04 | 1.88E-03 | 8.68E-04 | 1.05E-04 |
| 6h  |           | 3.41E-03 | 1.90E-03 | 2.11E-03 | 2.27E-03 |
| 12h |           | 6.37E-04 | 5.53E-04 | 1.63E-03 | 8.53E-05 |
| 24h |           | 9.61E-04 | 2.41E-04 | 9.90E-04 | 2.49E-04 |
| 36h |           | 1.46E-03 | 3.34E-04 | 3.82E-04 | 1.96E-05 |
| 48h |           | 9.51E-04 | 6.42E-04 | 1.43E-04 | 9.81E-05 |

|     |           |          |          |          |
|-----|-----------|----------|----------|----------|
| 72h | 6.09E-04  | 2.13E-04 | 2.16E-04 | 9.36E-06 |
|     | cgd4_2460 |          |          |          |
| 2h  | 1.49E-06  | 5.52E-06 | 9.56E-06 | 7.08E-05 |
| 6h  | 7.32E-07  | 4.94E-06 | 5.05E-06 | 5.94E-05 |
| 12h | 9.74E-06  | 3.36E-05 | 3.00E-05 | 1.63E-04 |
| 24h | 3.08E-06  | 2.95E-06 | 5.84E-06 | 5.10E-05 |
| 36h | 1.13E-06  | 3.74E-06 | 4.72E-06 | 8.20E-05 |
| 48h | 1.29E-06  | 4.39E-06 | 5.06E-06 | 7.87E-05 |
| 72h | 1.74E-06  | 1.42E-06 | 9.36E-07 | 3.79E-05 |
|     | cgd4_2530 |          |          |          |
| 2h  | 4.43E-07  | 2.78E-07 | 5.91E-07 | 5.93E-07 |
| 6h  | 6.05E-07  | 7.92E-07 | 7.23E-07 | 3.02E-06 |
| 12h | 7.01E-07  | 6.02E-07 | 4.54E-07 | 6.20E-07 |
| 24h | 2.65E-07  | 1.54E-07 | 5.28E-07 | 1.17E-06 |
| 36h | 2.01E-07  | 1.28E-07 | 1.92E-07 | 6.46E-07 |
| 48h | 1.40E-07  | 1.98E-07 | 3.01E-07 | 1.38E-06 |
| 72h | 6.25E-08  | 8.62E-08 | 8.49E-08 | 3.89E-07 |
|     | cgd4_2540 |          |          |          |
| 2h  | 2.97E-07  | 4.87E-08 | 2.64E-07 | 1.96E-07 |
| 6h  | 1.40E-06  | 1.05E-06 | 2.04E-06 | 7.72E-06 |
| 12h | 3.41E-07  | 4.86E-07 | 4.01E-07 | 7.24E-07 |
| 24h | 8.35E-07  | 4.37E-07 | 3.27E-06 | 3.25E-06 |
| 36h | 1.48E-06  | 9.97E-07 | 1.57E-06 | 8.47E-06 |
| 48h | 2.75E-06  | 1.43E-06 | 1.12E-06 | 4.79E-06 |
| 72h | 2.98E-07  | 5.49E-07 | 5.31E-07 | 9.05E-07 |
|     | cgd4_2680 |          |          |          |
| 2h  | 5.71E-05  | 3.56E-03 | 4.73E-04 | 2.25E-05 |
| 6h  | 1.21E-04  | 3.31E-03 | 1.17E-03 | 1.82E-04 |
| 12h | 1.50E-05  | 1.01E-05 | 5.33E-04 | 4.13E-06 |
| 24h | 1.46E-04  | 2.77E-04 | 3.80E-04 | 2.73E-05 |
| 36h | 7.24E-05  | 1.03E-03 | 3.31E-04 | 2.77E-06 |
| 48h | 8.06E-05  | 5.03E-04 | 1.82E-04 | 2.69E-05 |
| 72h | 3.84E-05  | 3.57E-04 | 5.45E-04 | 1.58E-06 |
|     | cgd4_2910 |          |          |          |
| 2h  | 9.59E-08  | 1.77E-07 | 0.00E+00 | 1.96E-06 |
| 6h  | 8.20E-09  | 5.23E-08 | 9.33E-08 | 1.66E-06 |
| 12h | 7.55E-07  | 6.45E-07 | 4.33E-07 | 3.09E-06 |
| 24h | 2.43E-07  | 6.32E-08 | 1.44E-07 | 2.35E-06 |
| 36h | 5.91E-07  | 7.86E-07 | 9.24E-07 | 3.88E-05 |
| 48h | 2.75E-07  | 8.90E-08 | 1.27E-07 | 4.45E-06 |
| 72h | 1.13E-07  | 2.15E-07 | 1.36E-07 | 2.47E-06 |
|     | cgd4_2950 |          |          |          |
| 2h  | 1.55E-07  | 3.00E-07 | 1.22E-07 | 1.47E-06 |
| 6h  | 5.50E-07  | 1.69E-07 | 1.42E-07 | 2.53E-05 |
| 12h | 7.46E-06  | 4.06E-06 | 1.84E-06 | 7.49E-06 |
| 24h | 1.78E-06  | 8.80E-07 | 4.25E-07 | 3.83E-07 |
| 36h | 3.57E-07  | 2.15E-07 | 8.69E-07 | 5.73E-07 |
| 48h | 4.63E-07  | 2.09E-07 | 2.17E-07 | 6.14E-07 |
| 72h | 8.17E-08  | 4.92E-08 | 4.54E-08 | 7.05E-06 |
|     | cgd4_2990 |          |          |          |
| 2h  | 1.55E-06  | 2.76E-07 | 1.09E-07 | 1.60E-07 |
| 6h  | 6.35E-07  | 1.90E-07 | 1.73E-07 | 1.00E-06 |
| 12h | 2.98E-06  | 1.04E-06 | 7.96E-07 | 1.25E-06 |

|           |          |          |          |          |
|-----------|----------|----------|----------|----------|
| 24h       | 7.06E-06 | 8.92E-07 | 4.98E-07 | 7.41E-07 |
| 36h       | 1.47E-06 | 2.96E-07 | 4.28E-07 | 4.19E-07 |
| 48h       | 3.28E-06 | 2.71E-07 | 5.30E-07 | 7.81E-07 |
| 72h       | 6.80E-07 | 2.53E-07 | 2.02E-07 | 9.62E-08 |
| cgd4_3000 |          |          |          |          |
| 2h        | 5.68E-05 | 6.07E-06 | 3.91E-06 | 1.75E-05 |
| 6h        | 6.84E-06 | 1.31E-05 | 9.66E-06 | 2.03E-05 |
| 12h       | 2.66E-06 | 8.92E-07 | 1.08E-05 | 5.14E-06 |
| 24h       | 2.08E-05 | 3.92E-06 | 1.06E-05 | 5.56E-06 |
| 36h       | 3.67E-06 | 1.76E-06 | 1.58E-06 | 1.80E-06 |
| 48h       | 1.43E-05 | 1.14E-06 | 1.39E-06 | 2.22E-06 |
| 72h       | 2.90E-06 | 4.21E-07 | 3.07E-07 | 3.04E-07 |
| cgd4_3020 |          |          |          |          |
| 2h        | 2.73E-06 | 3.05E-06 | 3.83E-06 | 7.00E-06 |
| 6h        | 1.88E-06 | 2.03E-06 | 2.39E-06 | 6.38E-06 |
| 12h       | 2.71E-06 | 8.20E-07 | 6.16E-06 | 3.81E-06 |
| 24h       | 2.25E-05 | 2.11E-06 | 4.56E-06 | 2.39E-06 |
| 36h       | 1.68E-06 | 1.36E-06 | 1.30E-06 | 1.90E-06 |
| 48h       | 2.59E-06 | 4.54E-07 | 8.93E-07 | 1.03E-06 |
| 72h       | 1.20E-06 | 1.83E-07 | 2.41E-07 | 4.35E-07 |
| cgd4_3080 |          |          |          |          |
| 2h        | 8.26E-04 | 8.64E-04 | 2.32E-03 | 2.56E-03 |
| 6h        | 2.81E-03 | 4.35E-03 | 9.51E-03 | 1.69E-02 |
| 12h       | 3.64E-04 | 2.39E-04 | 3.62E-03 | 2.01E-03 |
| 24h       | 3.35E-03 | 6.93E-04 | 4.10E-03 | 5.29E-03 |
| 36h       | 7.26E-04 | 8.54E-04 | 6.92E-04 | 9.34E-04 |
| 48h       | 8.73E-04 | 5.01E-04 | 1.21E-03 | 1.38E-04 |
| 72h       | 1.88E-04 | 2.12E-04 | 1.94E-04 | 1.74E-05 |
| cgd4_3130 |          |          |          |          |
| 2h        | 6.59E-06 | 7.65E-06 | 2.22E-05 | 4.99E-05 |
| 6h        | 6.96E-06 | 1.75E-05 | 2.61E-05 | 5.48E-05 |
| 12h       | 6.75E-06 | 5.27E-06 | 2.11E-05 | 1.82E-05 |
| 24h       | 3.86E-05 | 7.41E-06 | 2.37E-05 | 1.86E-05 |
| 36h       | 4.66E-06 | 7.45E-06 | 9.69E-06 | 1.40E-05 |
| 48h       | 6.20E-06 | 5.48E-06 | 9.10E-06 | 1.24E-05 |
| 72h       | 1.39E-06 | 2.80E-06 | 1.75E-06 | 3.11E-06 |
| cgd4_320  |          |          |          |          |
| 2h        | 0.00E+00 | 0.00E+00 | 0.00E+00 | 1.08E-08 |
| 6h        | 4.72E-08 | 5.23E-08 | 1.51E-07 | 3.11E-08 |
| 12h       | 0.00E+00 | 3.68E-09 | 3.17E-09 | 1.22E-08 |
| 24h       | 5.35E-09 | 6.46E-09 | 2.32E-08 | 1.96E-08 |
| 36h       | 3.44E-08 | 1.45E-08 | 6.06E-08 | 1.32E-08 |
| 48h       | 7.57E-08 | 6.63E-08 | 9.84E-08 | 1.24E-07 |
| 72h       | 2.59E-08 | 1.64E-08 | 2.47E-08 | 1.63E-08 |
| cgd4_3260 |          |          |          |          |
| 2h        | 1.27E-08 | 8.64E-08 | 8.27E-08 | 4.92E-07 |
| 6h        | 8.60E-09 | 1.04E-08 | 2.79E-09 | 6.05E-09 |
| 12h       | 3.73E-09 | 1.07E-09 | 2.87E-08 | 1.41E-08 |
| 24h       | 5.97E-09 | 9.16E-09 | 5.85E-08 | 1.73E-08 |
| 36h       | 6.25E-09 | 4.61E-08 | 5.23E-08 | 1.54E-07 |
| 48h       | 8.59E-08 | 2.75E-08 | 4.07E-08 | 6.18E-08 |
| 72h       | 1.94E-08 | 3.84E-08 | 7.78E-08 | 1.41E-07 |
| cgd4_3270 |          |          |          |          |

|     |           |          |          |          |
|-----|-----------|----------|----------|----------|
| 2h  | 1.34E-04  | 3.30E-04 | 1.30E-04 | 1.33E-04 |
| 6h  | 3.95E-03  | 3.10E-05 | 1.18E-03 | 1.80E-03 |
| 12h | 5.25E-04  | 2.06E-04 | 2.60E-04 | 2.76E-05 |
| 24h | 2.83E-05  | 4.36E-04 | 2.30E-04 | 5.84E-04 |
| 36h | 9.95E-04  | 5.65E-04 | 1.80E-04 | 4.50E-05 |
| 48h | 6.13E-04  | 1.15E-04 | 2.01E-04 | 2.67E-05 |
| 72h | 3.54E-04  | 6.72E-05 | 1.61E-05 | 1.53E-04 |
|     | cgd4_3340 |          |          |          |
| 2h  | 4.89E-03  | 4.03E-03 | 0.00E+00 | 7.69E-04 |
| 6h  | 1.63E-03  | 1.69E-04 | 9.01E-04 | 3.59E-04 |
| 12h | 2.56E-03  | 1.01E-03 | 2.50E-04 | 8.64E-04 |
| 24h | 5.58E-03  | 5.93E-05 | 1.33E-03 | 1.22E-04 |
| 36h | 4.49E-04  | 5.51E-04 | 9.74E-04 | 1.58E-04 |
| 48h | 4.86E-04  | 2.07E-04 | 2.00E-04 | 7.10E-04 |
| 72h | 2.31E-04  | 3.17E-04 | 1.78E-04 | 2.90E-05 |
|     | cgd4_3500 |          |          |          |
| 2h  | 0.00E+00  | 0.00E+00 | 0.00E+00 | 0.00E+00 |
| 6h  | 1.18E-09  | 0.00E+00 | 0.00E+00 | 0.00E+00 |
| 12h | 2.86E-08  | 0.00E+00 | 0.00E+00 | 0.00E+00 |
| 24h | 0.00E+00  | 4.12E-09 | 9.97E-08 | 9.81E-10 |
| 36h | 2.39E-08  | 6.07E-08 | 1.52E-05 | 1.66E-08 |
| 48h | 4.76E-07  | 5.24E-07 | 2.11E-05 | 2.01E-07 |
| 72h | 3.99E-08  | 9.74E-07 | 6.97E-07 | 7.58E-09 |
|     | cgd4_3530 |          |          |          |
| 2h  | 0.00E+00  | 3.12E-08 | 4.74E-05 | 0.00E+00 |
| 6h  | 0.00E+00  | 2.40E-08 | 0.00E+00 | 5.20E-09 |
| 12h | 7.26E-04  | 1.46E-03 | 1.06E-02 | 1.82E-03 |
| 24h | 2.66E-04  | 1.05E-03 | 4.26E-03 | 2.72E-04 |
| 36h | 4.33E-04  | 4.75E-04 | 6.55E-03 | 1.56E-03 |
| 48h | 3.66E-04  | 2.33E-04 | 3.10E-03 | 8.74E-04 |
| 72h | 4.89E-05  | 2.85E-05 | 4.27E-04 | 1.40E-05 |
|     | cgd4_3550 |          |          |          |
| 2h  | 8.33E-05  | 3.76E-05 | 7.88E-05 | 1.56E-04 |
| 6h  | 1.49E-05  | 1.43E-05 | 3.48E-05 | 1.47E-05 |
| 12h | 1.57E-05  | 6.18E-06 | 4.73E-05 | 1.72E-05 |
| 24h | 3.16E-05  | 3.59E-05 | 3.67E-05 | 3.22E-05 |
| 36h | 1.49E-05  | 1.06E-05 | 1.07E-05 | 2.62E-05 |
| 48h | 1.51E-05  | 8.69E-06 | 2.07E-05 | 1.38E-05 |
| 72h | 1.23E-06  | 8.82E-07 | 1.42E-06 | 2.31E-06 |
|     | cgd4_3570 |          |          |          |
| 2h  | 7.88E-07  | 1.55E-06 | 2.20E-06 | 7.98E-06 |
| 6h  | 4.44E-08  | 3.74E+00 | 6.41E-08 | 7.22E-08 |
| 12h | 2.30E-06  | 3.42E-06 | 2.19E-05 | 5.82E-06 |
| 24h | 1.15E-06  | 5.72E-06 | 3.60E-06 | 1.48E-06 |
| 36h | 2.85E-06  | 3.55E-06 | 1.15E-05 | 9.22E-06 |
| 48h | 1.53E-06  | 8.06E-07 | 3.87E-06 | 8.05E-07 |
| 72h | 1.20E-06  | 1.06E-06 | 2.55E-06 | 4.57E-07 |
|     | cgd4_3620 |          |          |          |
| 2h  | 2.97E-05  | 1.65E-07 | 3.73E-07 | 4.75E-07 |
| 6h  | 0.00E+00  | 3.06E-08 | 8.23E-09 | 7.16E-09 |
| 12h | 2.17E-04  | 5.10E-04 | 2.85E-04 | 2.94E-04 |
| 24h | 1.17E-04  | 1.29E-04 | 4.54E-05 | 5.30E-05 |
| 36h | 2.32E-05  | 3.01E-05 | 6.87E-05 | 1.64E-04 |



|     |           |          |          |          |
|-----|-----------|----------|----------|----------|
| 48h | 2.93E-05  | 1.96E-05 | 3.07E-05 | 1.65E-05 |
| 72h | 8.46E-06  | 5.77E-06 | 6.52E-06 | 1.26E-05 |
|     | cgd4_3630 |          |          |          |
| 2h  | 2.86E-02  | 2.58E-02 | 8.15E-05 | 1.34E-01 |
| 6h  | 5.58E-03  | 3.15E-03 | 1.36E-04 | 6.04E-02 |
| 12h | 1.99E-02  | 9.70E-03 | 1.19E-03 | 1.19E-01 |
| 24h | 6.73E-03  | 2.98E-03 | 8.47E-05 | 8.04E-02 |
| 36h | 3.20E-03  | 4.12E-04 | 5.85E-05 | 1.20E-05 |
| 48h | 4.81E-03  | 1.88E-03 | 3.99E-04 | 2.26E-03 |
| 72h | 2.97E-03  | 2.69E-04 | 2.74E-05 | 2.50E-02 |
|     | cgd4_3640 |          |          |          |
| 2h  | 1.88E-04  | 2.25E-04 | 2.33E-03 | 4.84E-05 |
| 6h  | 2.08E-05  | 3.46E-05 | 1.19E-03 | 2.84E-05 |
| 12h | 6.23E-05  | 9.55E-05 | 1.65E-03 | 1.86E-05 |
| 24h | 4.51E-05  | 4.04E-05 | 1.81E-04 | 1.16E-05 |
| 36h | 2.05E-05  | 3.33E-05 | 1.81E-04 | 1.54E-05 |
| 48h | 9.70E-06  | 7.27E-06 | 2.43E-04 | 1.08E-05 |
| 72h | 8.59E-06  | 1.62E-05 | 5.15E-05 | 4.93E-06 |
|     | cgd4_3670 |          |          |          |
| 2h  | 2.85E-03  | 2.38E-03 | 1.48E-02 | 1.40E-03 |
| 6h  | 7.76E-04  | 8.70E-04 | 9.40E-03 | 1.35E-03 |
| 12h | 4.22E-04  | 9.04E-04 | 1.56E-02 | 6.48E-04 |
| 24h | 0.00E+00  | 6.46E-04 | 2.48E-03 | 5.57E-04 |
| 36h | 5.16E-04  | 4.95E-04 | 1.19E-03 | 3.52E-04 |
| 48h | 3.98E-04  | 1.42E-04 | 9.16E-04 | 3.94E-04 |
| 72h | 1.09E-04  | 1.12E-04 | 2.98E-04 | 3.47E-05 |
|     | cgd4_3720 |          |          |          |
| 2h  | 0.00E+00  | 0.00E+00 | 0.00E+00 | 0.00E+00 |
| 6h  | 0.00E+00  | 0.00E+00 | 0.00E+00 | 0.00E+00 |
| 12h | 0.00E+00  | 0.00E+00 | 0.00E+00 | 0.00E+00 |
| 24h | 0.00E+00  | 1.86E-09 | 2.09E-08 | 8.53E-10 |
| 36h | 2.13E-08  | 2.41E-08 | 1.50E-08 | 5.10E-09 |
| 48h | 2.66E-06  | 5.69E-07 | 8.93E-06 | 1.53E-06 |
| 72h | 1.17E-06  | 1.03E-06 | 7.95E-06 | 1.63E-06 |
|     | cgd4_3880 |          |          |          |
| 2h  | 1.53E-07  | 2.59E-07 | 9.86E-08 | 1.55E-07 |
| 6h  | 2.59E-07  | 1.51E-07 | 2.97E-07 | 3.11E-07 |
| 12h | 3.54E-08  | 1.58E-08 | 4.54E-08 | 1.18E-08 |
| 24h | 1.11E-07  | 1.39E-07 | 2.11E-07 | 1.47E-07 |
| 36h | 4.96E-08  | 8.12E-08 | 3.60E-08 | 1.52E-07 |
| 48h | 5.50E-07  | 5.91E-08 | 1.00E-07 | 9.93E-08 |
| 72h | 1.47E-08  | 4.53E-08 | 7.53E-08 | 4.67E-08 |
|     | cgd4_3910 |          |          |          |
| 2h  | 8.92E-06  | 3.58E-06 | 3.05E-06 | 4.52E-06 |
| 6h  | 1.59E-06  | 1.84E-06 | 8.78E-07 | 1.89E-06 |
| 12h | 3.80E-06  | 1.66E-06 | 3.60E-06 | 3.77E-06 |
| 24h | 2.63E-06  | 2.74E-06 | 1.06E-06 | 3.75E-06 |
| 36h | 4.47E-06  | 2.21E-06 | 2.17E-06 | 2.90E-06 |
| 48h | 1.71E-06  | 9.12E-07 | 1.01E-06 | 1.54E-06 |
| 72h | 7.94E-07  | 8.54E-07 | 3.45E-07 | 4.03E-07 |
|     | cgd4_4020 |          |          |          |
| 2h  | 1.32E-03  | 1.82E-04 | 7.99E-06 | 2.92E-03 |
| 6h  | 4.43E-03  | 6.85E-05 | 1.45E-03 | 9.36E-04 |

|           |          |          |          |          |
|-----------|----------|----------|----------|----------|
| 12h       | 6.58E-04 | 9.62E-06 | 1.42E-04 | 4.01E-04 |
| 24h       | 2.13E-03 | 2.30E-05 | 2.57E-04 | 1.81E-04 |
| 36h       | 8.73E-04 | 4.89E-05 | 5.33E-04 | 1.69E-03 |
| 48h       | 3.73E-04 | 2.30E-05 | 1.07E-04 | 3.22E-04 |
| 72h       | 2.61E-04 | 6.26E-06 | 3.19E-05 | 5.24E-03 |
| cgd4_410  |          |          |          |          |
| 2h        | 3.68E-03 | 4.71E-04 | 1.86E-05 | 2.19E-03 |
| 6h        | 6.82E-03 | 2.29E-05 | 2.82E-05 | 2.36E-05 |
| 12h       | 6.97E-04 | 1.29E-04 | 9.21E-05 | 5.22E-05 |
| 24h       | 8.98E-04 | 2.33E-05 | 2.54E-04 | 1.17E-04 |
| 36h       | 6.05E-04 | 1.81E-05 | 2.28E-05 | 5.33E-03 |
| 48h       | 4.60E-04 | 7.30E-06 | 4.39E-05 | 1.02E-04 |
| 72h       | 1.94E-04 | 2.40E-06 | 1.07E-04 | 2.54E-03 |
| cgd4_4210 |          |          |          |          |
| 2h        | 1.25E-04 | 5.34E-04 | 1.32E-06 | 1.51E-04 |
| 6h        | 1.30E-05 | 1.13E-04 | 5.30E-05 | 3.75E-05 |
| 12h       | 6.65E-06 | 3.83E-05 | 3.34E-04 | 3.43E-05 |
| 24h       | 1.70E-05 | 6.70E-05 | 6.68E-05 | 2.20E-05 |
| 36h       | 8.98E-06 | 2.37E-07 | 2.82E-05 | 1.28E-05 |
| 48h       | 7.71E-06 | 1.33E-05 | 2.42E-07 | 5.77E-06 |
| 72h       | 7.54E-06 | 3.00E-05 | 1.47E-05 | 7.95E-06 |
| cgd4_4490 |          |          |          |          |
| 2h        | 5.76E-08 | 0.00E+00 | 0.00E+00 | 1.48E-09 |
| 6h        | 1.20E-07 | 1.41E-07 | 3.05E-07 | 1.59E-07 |
| 12h       | 1.24E-08 | 1.12E-09 | 2.94E-08 | 2.83E-08 |
| 24h       | 6.52E-08 | 8.95E-08 | 3.89E-07 | 1.48E-07 |
| 36h       | 8.66E-08 | 1.31E-07 | 1.01E-07 | 9.64E-08 |
| 48h       | 1.62E-07 | 1.04E-06 | 5.48E-07 | 1.31E-07 |
| 72h       | 5.91E-08 | 7.44E-07 | 8.52E-08 | 5.05E-08 |
| cgd4_520  |          |          |          |          |
| 2h        | 0.00E+00 | 0.00E+00 | 0.00E+00 | 0.00E+00 |
| 6h        | 1.56E-09 | 3.00E-09 | 1.77E-09 | 1.51E-09 |
| 12h       | 2.56E-07 | 5.31E-07 | 1.08E-06 | 3.09E-07 |
| 24h       | 2.17E-07 | 3.63E-07 | 5.71E-07 | 3.40E-07 |
| 36h       | 3.96E-07 | 8.06E-07 | 1.52E-06 | 7.93E-07 |
| 48h       | 4.90E-07 | 1.97E-06 | 3.45E-07 | 2.13E-07 |
| 72h       | 8.05E-08 | 5.01E-07 | 2.59E-07 | 4.16E-08 |
| cgd4_580  |          |          |          |          |
| 2h        | 1.10E-05 | 2.91E-05 | 6.24E-05 | 2.20E-06 |
| 6h        | 9.35E-05 | 7.80E-04 | 1.58E-03 | 4.66E-04 |
| 12h       | 1.05E-05 | 1.29E-04 | 2.56E-04 | 7.21E-05 |
| 24h       | 2.41E-05 | 1.41E-04 | 1.92E-04 | 1.55E-04 |
| 36h       | 2.27E-05 | 1.93E-04 | 1.87E-04 | 8.74E-05 |
| 48h       | 7.15E-05 | 7.00E-05 | 6.69E-05 | 5.41E-05 |
| 72h       | 1.55E-05 | 9.66E-05 | 1.85E-04 | 3.76E-05 |
| cgd4_630  |          |          |          |          |
| 2h        | 0.00E+00 | 0.00E+00 | 0.00E+00 | 0.00E+00 |
| 6h        | 3.15E-09 | 2.04E-08 | 8.10E-08 | 3.16E-09 |
| 12h       | 1.76E-08 | 3.95E-09 | 1.57E-08 | 4.66E-09 |
| 24h       | 1.40E-09 | 6.18E-09 | 1.60E-08 | 2.75E-09 |
| 36h       | 5.88E-09 | 6.32E-09 | 4.82E-08 | 7.38E-09 |
| 48h       | 1.69E-08 | 3.80E-08 | 3.84E-08 | 1.34E-08 |
| 72h       | 1.14E-08 | 1.60E-08 | 1.76E-08 | 1.05E-08 |

|     |           |          |          |          |
|-----|-----------|----------|----------|----------|
|     | cgd4_880  |          |          |          |
| 2h  | 1.82E-06  | 2.50E-06 | 5.52E-06 | 1.26E-06 |
| 6h  | 8.30E-07  | 5.35E-07 | 3.21E-06 | 9.32E-07 |
| 12h | 3.71E-07  | 8.04E-07 | 8.77E-06 | 8.60E-07 |
| 24h | 1.17E-06  | 1.03E-06 | 4.79E-06 | 1.02E-06 |
| 36h | 5.86E-07  | 7.57E-07 | 1.09E-06 | 6.54E-07 |
| 48h | 6.13E-07  | 2.30E-06 | 1.47E-06 | 3.61E-07 |
| 72h | 3.38E-07  | 1.02E-06 | 1.04E-06 | 2.35E-07 |
|     | cgd5_10   |          |          |          |
| 2h  | 1.29E-04  | 1.13E-03 | 1.09E-03 | 2.16E-04 |
| 6h  | 4.88E-05  | 1.35E-04 | 7.59E-04 | 1.43E-04 |
| 12h | 4.17E-05  | 2.80E-04 | 4.97E-04 | 6.04E-05 |
| 24h | 9.76E-05  | 1.22E-04 | 1.82E-04 | 6.46E-05 |
| 36h | 3.65E-05  | 1.44E-04 | 1.02E-04 | 5.30E-05 |
| 48h | 4.29E-05  | 8.35E-05 | 9.22E-05 | 2.93E-05 |
| 72h | 2.32E-05  | 3.06E-05 | 2.83E-05 | 1.45E-05 |
|     | cgd5_1030 |          |          |          |
| 2h  | 1.83E-06  | 1.17E-04 | 2.35E-04 | 9.44E-05 |
| 6h  | 2.01E-06  | 1.47E-05 | 8.20E-05 | 9.51E-06 |
| 12h | 2.83E-07  | 1.06E-05 | 2.11E-05 | 2.36E-06 |
| 24h | 1.19E-06  | 1.28E-04 | 3.88E-05 | 3.93E-06 |
| 36h | 2.94E-06  | 4.60E-05 | 1.17E-04 | 8.10E-06 |
| 48h | 1.50E-06  | 1.59E-05 | 2.07E-05 | 1.17E-06 |
| 72h | 9.56E-06  | 1.05E-05 | 1.70E-04 | 5.95E-07 |
|     | cgd5_1050 |          |          |          |
| 2h  | 9.08E-08  | 8.51E-08 | 2.61E-08 | 2.80E-08 |
| 6h  | 2.24E-06  | 1.73E-07 | 1.69E-06 | 2.60E-06 |
| 12h | 3.85E-07  | 2.39E-07 | 5.70E-07 | 4.80E-07 |
| 24h | 3.24E-07  | 2.90E-07 | 3.98E-07 | 1.98E-07 |
| 36h | 3.48E-07  | 3.37E-07 | 6.68E-07 | 5.46E-07 |
| 48h | 2.34E-07  | 2.66E-07 | 3.72E-07 | 3.04E-07 |
| 72h | 8.26E-08  | 6.22E-08 | 1.60E-07 | 2.82E-07 |
|     | cgd5_1080 |          |          |          |
| 2h  | 3.40E-04  | 1.60E-04 | 1.08E-04 | 1.80E-05 |
| 6h  | 4.51E-04  | 3.82E-04 | 9.18E-05 | 2.43E-04 |
| 12h | 5.60E-04  | 3.36E-04 | 2.83E-04 | 8.44E-06 |
| 24h | 4.90E-04  | 2.71E-04 | 2.73E-04 | 6.64E-06 |
| 36h | 1.64E-04  | 3.37E-04 | 9.04E-05 | 8.54E-06 |
| 48h | 8.64E-04  | 7.31E-05 | 8.14E-05 | 5.85E-05 |
| 72h | 2.29E-04  | 5.74E-05 | 4.92E-05 | 7.24E-06 |
|     | cgd5_1150 |          |          |          |
| 2h  | 3.68E-07  | 8.33E-07 | 2.88E-07 | 7.05E-07 |
| 6h  | 9.07E-07  | 6.20E-07 | 8.04E-07 | 4.29E-06 |
| 12h | 1.09E-07  | 2.32E-07 | 2.17E-07 | 4.73E-07 |
| 24h | 4.67E-07  | 6.12E-07 | 6.28E-07 | 7.62E-07 |
| 36h | 4.64E-07  | 5.85E-07 | 2.47E-07 | 4.20E-07 |
| 48h | 1.56E-07  | 2.35E-07 | 1.72E-07 | 5.37E-07 |
| 72h | 9.97E-08  | 1.07E-07 | 6.57E-08 | 9.01E-08 |
|     | cgd5_1290 |          |          |          |
| 2h  | 5.61E-04  | 1.33E-04 | 3.54E-05 | 4.07E-06 |
| 6h  | 5.02E-05  | 2.62E-04 | 1.06E-04 | 1.30E-05 |
| 12h | 1.31E-05  | 1.57E-04 | 3.07E-05 | 3.12E-05 |
| 24h | 1.29E-04  | 2.82E-04 | 4.75E-04 | 5.04E-06 |

|     |           |          |          |          |
|-----|-----------|----------|----------|----------|
| 36h | 1.19E-04  | 5.47E-04 | 9.37E-05 | 7.11E-05 |
| 48h | 9.54E-05  | 1.98E-04 | 1.74E-04 | 5.61E-05 |
| 72h | 5.62E-05  | 1.07E-04 | 1.05E-04 | 1.64E-05 |
|     | cgd5_1310 |          |          |          |
| 2h  | 0.00E+00  | 2.33E-06 | 0.00E+00 | 2.08E-08 |
| 6h  | 0.00E+00  | 3.08E-06 | 5.04E-04 | 4.21E-07 |
| 12h | 0.00E+00  | 0.00E+00 | 2.98E-04 | 9.91E-07 |
| 24h | 0.00E+00  | 0.00E+00 | 3.80E-03 | 6.99E-07 |
| 36h | 0.00E+00  | 0.00E+00 | 1.29E-03 | 2.47E-07 |
| 48h | 0.00E+00  | 0.00E+00 | 1.41E-03 | 7.67E-07 |
| 72h | 0.00E+00  | 0.00E+00 | 4.56E-04 | 3.48E-07 |
|     | cgd5_1420 |          |          |          |
| 2h  | 9.29E-08  | 0.00E+00 | 6.58E-09 | 0.00E+00 |
| 6h  | 6.35E-08  | 1.17E-06 | 8.95E-08 | 1.22E-06 |
| 12h | 0.00E+00  | 1.32E-05 | 1.27E-06 | 2.89E-06 |
| 24h | 4.81E-07  | 1.44E-05 | 1.26E-06 | 2.52E-08 |
| 36h | 3.48E-06  | 8.40E-05 | 3.84E-06 | 1.15E-06 |
| 48h | 4.51E-05  | 5.33E-05 | 3.57E-05 | 2.90E-06 |
| 72h | 6.95E-06  | 8.21E-05 | 9.94E-06 | 6.65E-06 |
|     | cgd5_1470 |          |          |          |
| 2h  | 1.49E-04  | 1.40E-04 | 5.55E-05 | 4.40E-04 |
| 6h  | 2.53E-04  | 6.11E-05 | 1.94E-04 | 4.19E-04 |
| 12h | 9.85E-05  | 1.39E-04 | 1.46E-04 | 7.13E-04 |
| 24h | 1.81E-04  | 1.83E-04 | 1.98E-04 | 2.74E-04 |
| 36h | 1.31E-04  | 7.03E-05 | 1.33E-04 | 5.30E-04 |
| 48h | 6.43E-05  | 6.57E-05 | 6.22E-05 | 1.48E-04 |
| 72h | 2.84E-05  | 2.18E-05 | 2.03E-05 | 7.50E-05 |
|     | cgd5_1520 |          |          |          |
| 2h  | 1.39E-08  | 0.00E+00 | 0.00E+00 | 9.37E-08 |
| 6h  | 0.00E+00  | 2.37E-08 | 1.27E-08 | 5.14E-07 |
| 12h | 2.09E-05  | 6.57E-05 | 1.15E-05 | 7.68E-04 |
| 24h | 4.95E-06  | 4.17E-06 | 9.78E-07 | 2.94E-05 |
| 36h | 4.59E-07  | 1.40E-06 | 2.88E-06 | 8.87E-05 |
| 48h | 7.44E-07  | 4.34E-07 | 3.41E-07 | 2.52E-05 |
| 72h | 1.44E-06  | 3.46E-07 | 2.25E-07 | 2.10E-05 |
|     | cgd5_1530 |          |          |          |
| 2h  | 2.14E-09  | 0.00E+00 | 0.00E+00 | 3.76E-09 |
| 6h  | 8.68E-07  | 1.55E-07 | 5.02E-07 | 2.76E-06 |
| 12h | 1.60E-07  | 1.11E-07 | 9.34E-08 | 8.31E-07 |
| 24h | 1.29E-07  | 9.07E-08 | 5.53E-07 | 8.10E-07 |
| 36h | 3.49E-07  | 1.91E-07 | 3.35E-07 | 3.64E-06 |
| 48h | 4.52E-07  | 2.31E-07 | 4.23E-07 | 9.83E-07 |
| 72h | 6.42E-08  | 8.82E-08 | 1.61E-08 | 3.11E-07 |
|     | cgd5_1540 |          |          |          |
| 2h  | 0.00E+00  | 1.78E-09 | 0.00E+00 | 0.00E+00 |
| 6h  | 1.27E-07  | 2.71E-08 | 1.84E-07 | 4.67E-05 |
| 12h | 1.78E-07  | 7.14E-08 | 3.80E-08 | 2.22E-05 |
| 24h | 1.02E-07  | 1.58E-06 | 4.45E-07 | 1.61E-05 |
| 36h | 6.63E-07  | 1.45E-06 | 2.46E-07 | 7.19E-06 |
| 48h | 1.97E-07  | 3.20E-07 | 2.58E-07 | 1.10E-05 |
| 72h | 6.47E-08  | 1.04E-06 | 2.50E-08 | 3.49E-05 |
|     | cgd5_1740 |          |          |          |
| 2h  | 3.01E-06  | 7.08E-07 | 6.15E-07 | 1.32E-06 |

|           |          |          |          |          |
|-----------|----------|----------|----------|----------|
| 6h        | 4.77E-06 | 1.16E-06 | 1.96E-06 | 5.50E-06 |
| 12h       | 3.33E-07 | 3.77E-08 | 3.16E-07 | 2.91E-07 |
| 24h       | 6.37E-06 | 3.50E-07 | 3.10E-06 | 1.66E-06 |
| 36h       | 1.42E-06 | 5.06E-07 | 3.88E-07 | 1.78E-06 |
| 48h       | 4.67E-06 | 5.69E-07 | 1.29E-06 | 2.14E-06 |
| 72h       | 4.70E-07 | 3.82E-07 | 4.02E-07 | 6.06E-07 |
| cgd5_1790 |          |          |          |          |
| 2h        | 1.60E-05 | 2.12E-07 | 4.94E-07 | 1.91E-06 |
| 6h        | 3.56E-06 | 2.00E-07 | 5.86E-07 | 1.29E-06 |
| 12h       | 2.02E-06 | 6.14E-08 | 6.81E-07 | 6.31E-07 |
| 24h       | 5.44E-06 | 4.23E-07 | 1.42E-06 | 1.14E-06 |
| 36h       | 1.46E-06 | 2.34E-07 | 5.36E-07 | 8.61E-07 |
| 48h       | 3.52E-06 | 3.28E-07 | 8.00E-07 | 1.01E-06 |
| 72h       | 4.78E-06 | 2.84E-07 | 8.06E-07 | 8.03E-07 |
| cgd5_1840 |          |          |          |          |
| 2h        | 3.65E-06 | 1.06E-06 | 1.15E-06 | 5.24E-06 |
| 6h        | 3.15E-07 | 3.86E-07 | 9.18E-07 | 1.28E-06 |
| 12h       | 1.62E-06 | 7.03E-07 | 1.52E-06 | 1.38E-06 |
| 24h       | 8.39E-06 | 1.26E-06 | 2.41E-06 | 2.05E-06 |
| 36h       | 1.07E-06 | 5.83E-07 | 8.71E-07 | 7.21E-07 |
| 48h       | 1.46E-06 | 2.47E-07 | 1.00E-06 | 9.01E-07 |
| 72h       | 5.19E-07 | 1.64E-07 | 2.47E-07 | 1.71E-07 |
| cgd5_2000 |          |          |          |          |
| 2h        | 1.13E-03 | 1.98E-05 | 4.41E-04 | 7.76E-04 |
| 6h        | 4.29E-05 | 3.67E-06 | 3.26E-05 | 1.25E-04 |
| 12h       | 2.90E-04 | 5.29E-06 | 2.10E-04 | 1.96E-04 |
| 24h       | 6.03E-04 | 1.25E-05 | 9.68E-05 | 9.55E-05 |
| 36h       | 2.04E-04 | 1.48E-05 | 1.11E-04 | 1.27E-04 |
| 48h       | 6.47E-04 | 8.30E-06 | 9.88E-05 | 9.21E-05 |
| 72h       | 2.84E-04 | 2.95E-06 | 2.15E-05 | 1.98E-05 |
| cgd5_2030 |          |          |          |          |
| 2h        | 0.00E+00 | 0.00E+00 | 0.00E+00 | 0.00E+00 |
| 6h        | 4.34E-09 | 6.35E-09 | 1.46E-08 | 9.79E-09 |
| 12h       | 6.31E-08 | 2.63E-08 | 1.15E-08 | 2.25E-08 |
| 24h       | 3.90E-08 | 1.36E-08 | 7.85E-08 | 6.50E-08 |
| 36h       | 4.30E-08 | 4.67E-08 | 1.06E-07 | 1.02E-07 |
| 48h       | 1.76E-07 | 3.25E-08 | 1.22E-07 | 5.98E-08 |
| 72h       | 3.38E-08 | 1.97E-08 | 2.14E-08 | 2.19E-08 |
| cgd5_2080 |          |          |          |          |
| 2h        | 0.00E+00 | 0.00E+00 | 0.00E+00 | 0.00E+00 |
| 6h        | 3.29E-10 | 6.82E-10 | 1.66E-08 | 2.75E-10 |
| 12h       | 4.55E-09 | 1.42E-09 | 2.05E-08 | 1.63E-08 |
| 24h       | 1.01E-07 | 2.08E-08 | 9.51E-08 | 7.61E-08 |
| 36h       | 8.49E-08 | 9.67E-08 | 1.39E-07 | 1.30E-07 |
| 48h       | 1.10E-06 | 2.44E-07 | 6.86E-07 | 9.70E-07 |
| 72h       | 1.44E-06 | 3.76E-07 | 1.70E-06 | 9.92E-07 |
| cgd5_2450 |          |          |          |          |
| 2h        | 0.00E+00 | 1.34E-08 | 0.00E+00 | 2.36E-07 |
| 6h        | 3.28E-06 | 1.07E-06 | 3.84E-06 | 1.29E-05 |
| 12h       | 2.25E-07 | 8.41E-08 | 4.28E-07 | 1.70E-07 |
| 24h       | 2.90E-06 | 3.15E-07 | 4.47E-06 | 6.80E-06 |
| 36h       | 4.83E-06 | 2.32E-07 | 9.20E-07 | 2.35E-06 |
| 48h       | 2.06E-05 | 3.80E-07 | 1.68E-06 | 3.48E-06 |

|     |           |          |          |          |
|-----|-----------|----------|----------|----------|
| 72h | 1.28E-05  | 1.41E-06 | 4.21E-06 | 1.70E-06 |
|     | cgd5_2630 |          |          |          |
| 2h  | 1.19E-04  | 2.97E-04 | 2.80E-03 | 1.14E-02 |
| 6h  | 6.10E-05  | 7.14E-05 | 2.09E-04 | 1.24E-03 |
| 12h | 1.11E-04  | 4.69E-05 | 6.30E-04 | 1.02E-03 |
| 24h | 8.34E-05  | 1.99E-04 | 7.36E-04 | 9.61E-04 |
| 36h | 3.16E-05  | 1.57E-04 | 4.40E-04 | 4.58E-04 |
| 48h | 8.18E-05  | 4.59E-05 | 6.90E-04 | 6.02E-04 |
| 72h | 4.97E-05  | 3.40E-05 | 4.36E-04 | 3.21E-04 |
|     | cgd5_270  |          |          |          |
| 2h  | 0.00E+00  | 3.14E-05 | 0.00E+00 | 2.40E-06 |
| 6h  | 5.89E-05  | 1.14E-05 | 1.11E-04 | 1.33E-05 |
| 12h | 7.49E-05  | 8.47E-06 | 4.61E-05 | 1.55E-04 |
| 24h | 4.84E-06  | 2.22E-07 | 3.19E-06 | 6.86E-06 |
| 36h | 5.56E-05  | 4.01E-05 | 2.05E-06 | 6.33E-06 |
| 48h | 5.38E-05  | 6.86E-06 | 3.55E-06 | 5.93E-06 |
| 72h | 2.31E-05  | 2.43E-05 | 1.14E-06 | 5.49E-06 |
|     | cgd5_2700 |          |          |          |
| 2h  | 3.27E-06  | 0.00E+00 | 1.58E-04 | 1.57E+02 |
| 6h  | 1.21E-06  | 1.28E-06 | 3.96E-06 | 5.48E+01 |
| 12h | 1.29E-05  | 5.71E-06 | 3.95E-06 | 2.96E+01 |
| 24h | 0.00E+00  | 0.00E+00 | 1.98E-05 | 2.34E+01 |
| 36h | 8.84E-07  | 4.41E-06 | 1.13E-05 | 6.75E+00 |
| 48h | 1.85E-05  | 0.00E+00 | 8.74E-05 | 7.47E+00 |
| 72h | 1.06E-07  | 5.06E-07 | 4.57E-07 | 3.00E+00 |
|     | cgd5_2710 |          |          |          |
| 2h  | 3.66E-05  | 8.50E-08 | 3.11E-08 | 1.89E-07 |
| 6h  | 6.95E-07  | 1.01E-07 | 2.80E-08 | 1.50E-07 |
| 12h | 8.54E-07  | 1.13E-07 | 1.70E-08 | 8.29E-08 |
| 24h | 2.32E-07  | 9.83E-08 | 6.17E-08 | 8.00E-08 |
| 36h | 8.18E-08  | 1.50E-07 | 4.05E-08 | 9.74E-08 |
| 48h | 1.28E-06  | 1.18E-07 | 3.54E-08 | 1.13E-07 |
| 72h | 1.66E-07  | 3.56E-08 | 5.57E-09 | 4.56E-09 |
|     | cgd5_2720 |          |          |          |
| 2h  | 3.65E-04  | 1.89E-05 | 7.45E-06 | 3.08E-05 |
| 6h  | 5.92E-06  | 8.52E-05 | 8.63E-07 | 2.57E-06 |
| 12h | 8.45E-05  | 1.17E-05 | 2.05E-05 | 2.55E-05 |
| 24h | 7.34E-05  | 1.89E-05 | 4.01E-06 | 7.65E-06 |
| 36h | 4.97E-06  | 1.16E-05 | 3.16E-06 | 4.92E-06 |
| 48h | 1.34E-05  | 8.29E-06 | 9.76E-07 | 2.15E-06 |
| 72h | 1.66E-06  | 4.43E-06 | 4.41E-07 | 1.15E-06 |
|     | cgd5_2750 |          |          |          |
| 2h  | 1.08E-05  | 1.17E-04 | 6.78E-08 | 9.08E-06 |
| 6h  | 6.55E-05  | 9.58E-05 | 9.33E-07 | 2.65E-05 |
| 12h | 6.21E-04  | 5.68E-05 | 1.55E-05 | 8.62E-05 |
| 24h | 1.57E-05  | 1.62E-05 | 4.77E-06 | 1.40E-05 |
| 36h | 1.51E-05  | 1.68E-05 | 8.52E-06 | 4.08E-05 |
| 48h | 1.93E-05  | 1.39E-05 | 7.82E-06 | 6.53E-05 |
| 72h | 1.86E-04  | 5.27E-05 | 2.07E-05 | 6.89E-05 |
|     | cgd5_2780 |          |          |          |
| 2h  | 4.77E-04  | 9.25E-04 | 8.39E-05 | 3.69E-04 |
| 6h  | 2.03E-03  | 2.05E-03 | 3.33E-04 | 1.19E-03 |
| 12h | 1.17E-03  | 1.32E-04 | 1.43E-04 | 2.45E-04 |

|     |           |          |          |          |
|-----|-----------|----------|----------|----------|
| 24h | 9.04E-04  | 9.59E-04 | 1.39E-04 | 4.73E-04 |
| 36h | 3.53E-04  | 6.78E-04 | 6.52E-05 | 1.68E-04 |
| 48h | 5.84E-04  | 1.04E-04 | 5.83E-05 | 7.19E-05 |
| 72h | 1.01E-04  | 3.52E-05 | 1.02E-05 | 1.11E-05 |
|     | cgd5_2800 |          |          |          |
| 2h  | 2.42E-06  | 1.20E-06 | 3.41E-04 | 2.86E-04 |
| 6h  | 5.67E-06  | 2.59E-06 | 1.60E-03 | 1.51E-04 |
| 12h | 1.59E-04  | 4.05E-05 | 1.18E-02 | 1.34E-03 |
| 24h | 4.37E-05  | 7.00E-05 | 1.50E-03 | 7.10E-04 |
| 36h | 1.34E-05  | 3.34E-05 | 4.04E-03 | 7.37E-04 |
| 48h | 3.75E-05  | 1.41E-05 | 1.43E-03 | 1.24E-03 |
| 72h | 3.87E-06  | 8.48E-06 | 1.10E-03 | 8.56E-04 |
|     | cgd5_2900 |          |          |          |
| 2h  | 0.00E+00  | 0.00E+00 | 0.00E+00 | 0.00E+00 |
| 6h  | 0.00E+00  | 0.00E+00 | 0.00E+00 | 0.00E+00 |
| 12h | 7.24E-05  | 1.05E-05 | 2.19E-05 | 1.04E-04 |
| 24h | 3.01E-05  | 9.90E-06 | 2.00E-06 | 5.32E-06 |
| 36h | 4.65E-05  | 2.76E-05 | 5.94E-05 | 1.01E-04 |
| 48h | 5.18E-05  | 1.38E-06 | 4.85E-05 | 2.01E-04 |
| 72h | 9.49E-05  | 3.72E-06 | 7.33E-05 | 1.50E-04 |
|     | cgd5_3040 |          |          |          |
| 2h  | 0.00E+00  | 2.42E-05 | 3.92E-06 | 6.14E-06 |
| 6h  | 1.26E-03  | 1.56E-05 | 3.64E-05 | 4.59E-05 |
| 12h | 6.38E-06  | 1.63E-06 | 5.34E-06 | 5.27E-06 |
| 24h | 1.37E-05  | 1.05E-05 | 1.79E-05 | 1.03E-05 |
| 36h | 2.22E-06  | 6.08E-06 | 3.93E-06 | 5.68E-06 |
| 48h | 7.34E-06  | 1.35E-05 | 2.98E-06 | 2.06E-06 |
| 72h | 6.75E-07  | 2.83E-06 | 5.37E-07 | 7.22E-07 |
|     | cgd5_3050 |          |          |          |
| 2h  | 0.00E+00  | 0.00E+00 | 0.00E+00 | 0.00E+00 |
| 6h  | 0.00E+00  | 7.49E-07 | 0.00E+00 | 0.00E+00 |
| 12h | 2.15E-04  | 4.22E-05 | 2.39E-03 | 2.52E-03 |
| 24h | 6.50E-05  | 4.18E-05 | 6.62E-05 | 1.23E-04 |
| 36h | 8.80E-06  | 7.68E-06 | 1.17E-03 | 1.01E-03 |
| 48h | 2.58E-06  | 3.44E-06 | 8.85E-05 | 4.03E-04 |
| 72h | 2.88E-05  | 2.90E-06 | 2.24E-05 | 5.11E-05 |
|     | cgd5_3060 |          |          |          |
| 2h  | 0.00E+00  | 0.00E+00 | 0.00E+00 | 0.00E+00 |
| 6h  | 0.00E+00  | 0.00E+00 | 0.00E+00 | 1.79E-10 |
| 12h | 1.54E-08  | 2.74E-09 | 5.48E-09 | 9.85E-09 |
| 24h | 5.04E-09  | 2.56E-08 | 2.46E-08 | 6.98E-09 |
| 36h | 3.63E-08  | 7.70E-07 | 8.08E-08 | 9.42E-08 |
| 48h | 1.80E-07  | 8.60E-07 | 1.41E-07 | 5.93E-08 |
| 72h | 1.67E-07  | 4.00E-07 | 5.08E-08 | 9.38E-08 |
|     | cgd7_4450 |          |          |          |
| 2h  | 6.10E-03  | 1.65E-02 | 3.05E-01 | 1.54E-03 |
| 6h  | 2.01E-01  | 1.54E-01 | 1.27E+01 | 4.83E-01 |
| 12h | 1.19E-03  | 1.62E-02 | 1.64E+00 | 1.52E-02 |
| 24h | 2.79E-02  | 4.92E-02 | 3.87E+00 | 8.10E-02 |
| 36h | 3.60E-02  | 1.49E-01 | 2.30E+00 | 5.94E-02 |
| 48h | 3.23E-02  | 1.01E-01 | 1.08E+00 | 4.80E-02 |
| 72h | 2.38E-03  | 9.75E-03 | 3.56E-01 | 4.35E-03 |
|     | cgd5_3720 |          |          |          |

|     |           |          |          |           |
|-----|-----------|----------|----------|-----------|
| 2h  | 4.52E-06  | 1.17E-05 | 3.68E-05 | 6.04E-06  |
| 6h  | 1.20E-05  | 1.82E-05 | 6.79E-05 | 4.29E-05  |
| 12h | 1.34E-06  | 0.00E+00 | 3.36E-05 | 1.35E-05  |
| 24h | 1.10E-05  | 1.40E-05 | 8.04E-05 | 2.03E-05  |
| 36h | 5.58E-06  | 5.10E-06 | 3.23E-05 | 5.44E-06  |
| 48h | 3.02E-06  | 2.74E-06 | 2.89E-05 | 1.11E-05  |
| 72h | 4.60E-07  | 8.43E-07 | 9.33E-06 | 2.00E-06  |
|     | cgd5_4450 |          |          |           |
| 2h  | 2.34E-07  | 2.62E-07 | 1.01E-06 | 8.49E-08  |
| 6h  | 8.69E-08  | 1.85E-07 | 5.97E-06 | 1.02E-06  |
| 12h | 7.19E-08  | 2.08E-07 | 1.10E-05 | 1.93E-07  |
| 24h | 9.04E-07  | 7.93E-07 | 1.19E-05 | 1.28E-06  |
| 36h | 5.87E-07  | 1.64E-06 | 1.80E-05 | 1.76E-06  |
| 48h | 2.04E-06  | 2.34E-06 | 4.23E-05 | 1.27E-05  |
| 72h | 4.46E-06  | 4.67E-06 | 7.01E-05 | 6.40E-06  |
|     | cgd5_4540 |          |          |           |
| 2h  | 3.26E-04  | 2.39E-04 | 2.96E-02 | 1.98E-04  |
| 6h  | 5.85E-04  | 3.68E-04 | 7.44E-02 | 1.49E-03  |
| 12h | 4.19E-05  | 8.99E-05 | 5.32E-03 | 2.86E-04  |
| 24h | 1.87E-04  | 2.51E-04 | 2.69E-02 | 5.12E-04  |
| 36h | 1.44E-04  | 1.74E-04 | 3.18E-02 | 5.35E-04  |
| 48h | 1.83E-04  | 4.11E-04 | 1.94E-02 | 7.44E-04  |
| 72h | 1.07E-04  | 1.10E-04 | 8.29E-03 | 1.65E-04  |
|     | cgd5_4560 |          |          |           |
| 2h  | 4.26E-04  | 3.94E-04 | 2.73E-04 | 1.28E-04  |
| 6h  | 2.68E-04  | 1.93E-04 | 2.85E-03 | 4.71E-04  |
| 12h | 8.93E-06  | 8.65E-05 | 1.30E-04 | 1.84E-05  |
| 24h | 1.02E-04  | 2.07E-04 | 1.03E-03 | 1.49E-04  |
| 36h | 6.97E-05  | 1.83E-04 | 2.86E-04 | 1.60E-04  |
| 48h | 5.09E-05  | 2.55E-05 | 3.74E-04 | 6.79E-05  |
| 72h | 7.90E-06  | 9.93E-06 | 3.96E-05 | 1.41E-05  |
|     | cgd5_4580 |          |          |           |
| 2h  | 3.70E-05  | 4.19E-05 | 7.67E-05 | 2.44E-05  |
| 6h  | 4.18E-05  | 3.54E-05 | 1.06E-03 | 3.68E-05  |
| 12h | 1.05E-05  | 3.53E-05 | 6.26E-04 | 3.18E-05  |
| 24h | 2.66E-05  | 3.27E-05 | 1.06E-03 | 3.81E-05  |
| 36h | 2.79E-05  | 5.85E-05 | 1.13E-03 | 4.69E-05  |
| 48h | 3.41E-05  | 2.78E-05 | 1.83E-03 | 8.34E-05  |
| 72h | 1.36E-05  | 1.13E-05 | 1.29E-04 | 1.22E-05  |
|     | cgd5_4600 |          |          |           |
| 2h  | 4.07E-07  | 2.37E-07 | 0.00E+00 | 6.19E-07  |
| 6h  | 2.32E-06  | 5.54E-07 | 3.48E-05 | 1.10E-06  |
| 12h | 1.12E-06  | 8.26E-06 | 6.11E-06 | 3.40E-06  |
| 24h | 2.59E-06  | 3.24E-06 | 1.60E-05 | 2.73E-06  |
| 36h | 6.86E-06  | 6.42E-06 | 2.21E-05 | 6.31E-06  |
| 48h | 1.89E-06  | 1.71E-06 | 3.16E-05 | 5.00E-06  |
| 72h | 3.52E-07  | 6.45E-07 | 1.03E-05 | 9.12E-07  |
|     | cgd6_1850 |          |          |           |
| 2h  | 0.00E+00  | 0.00E+00 | 0.00E+00 | 0.00E+00  |
| 6h  | 0.00E+00  | 0.00E+00 | 0.00E+00 | 4.79E+01  |
| 12h | 0.00E+00  | 0.00E+00 | 0.00E+00 | -2.77E+10 |
| 24h | 0.00E+00  | 0.00E+00 | 0.00E+00 | 1.30E+03  |
| 36h | 0.00E+00  | 0.00E+00 | 0.00E+00 | -2.76E+10 |



|           |          |          |          |          |
|-----------|----------|----------|----------|----------|
| 48h       | 0.00E+00 | 0.00E+00 | 0.00E+00 | 4.47E+03 |
| 72h       | 0.00E+00 | 0.00E+00 | 0.00E+00 | 2.42E-07 |
| cgd6_3430 |          |          |          |          |
| 2h        | 3.15E-07 | 2.92E-07 | 1.08E-06 | 1.05E-06 |
| 6h        | 3.48E-07 | 3.52E-07 | 2.17E-06 | 2.23E-06 |
| 12h       | 1.42E-09 | 6.49E-08 | 7.14E-07 | 2.11E-07 |
| 24h       | 5.16E-07 | 7.10E-07 | 3.75E-06 | 4.76E-07 |
| 36h       | 1.94E-07 | 5.11E-07 | 1.06E-06 | 1.94E-07 |
| 48h       | 1.83E-07 | 9.64E-08 | 8.59E-07 | 6.12E-07 |
| 72h       | 8.88E-08 | 1.73E-07 | 6.10E-07 | 1.15E-07 |
| cgd6_330  |          |          |          |          |
| 2h        | 1.37E-06 | 2.29E-07 | 1.48E-05 | 3.34E-06 |
| 6h        | 8.14E-08 | 1.93E-08 | 1.18E-05 | 1.88E-07 |
| 12h       | 2.36E-05 | 5.14E-05 | 9.19E-05 | 6.45E-06 |
| 24h       | 2.31E-06 | 7.34E-06 | 6.57E-05 | 1.66E-06 |
| 36h       | 5.84E-06 | 1.58E-05 | 8.94E-05 | 6.25E-06 |
| 48h       | 9.44E-06 | 2.81E-06 | 4.82E-04 | 8.42E-06 |
| 72h       | 2.44E-06 | 4.55E-06 | 2.55E-04 | 5.75E-06 |
| cgd7_1140 |          |          |          |          |
| 2h        | 0.00E+00 | 0.00E+00 | 0.00E+00 | 0.00E+00 |
| 6h        | 0.00E+00 | 0.00E+00 | 0.00E+00 | 0.00E+00 |
| 12h       | 1.06E-08 | 9.54E-07 | 1.06E-08 | 1.18E-07 |
| 24h       | 2.60E-08 | 2.89E-07 | 2.20E-07 | 1.75E-07 |
| 36h       | 1.12E-07 | 7.35E-07 | 2.75E-07 | 6.47E-08 |
| 48h       | 4.57E-08 | 2.12E-07 | 1.09E-06 | 2.08E-07 |
| 72h       | 3.40E-08 | 8.35E-07 | 4.85E-07 | 1.30E-07 |
| cgd6_380  |          |          |          |          |
| 2h        | 0.00E+00 | 0.00E+00 | 0.00E+00 | 0.00E+00 |
| 6h        | 0.00E+00 | 0.00E+00 | 0.00E+00 | 0.00E+00 |
| 12h       | 6.73E-06 | 8.84E-04 | 3.31E-06 | 3.26E-04 |
| 24h       | 6.42E-06 | 1.11E-04 | 5.74E-06 | 3.80E-06 |
| 36h       | 3.56E-06 | 7.91E-04 | 2.95E-06 | 1.75E-05 |
| 48h       | 9.66E-05 | 3.05E-04 | 1.04E-04 | 1.98E-04 |
| 72h       | 2.02E-05 | 9.98E-04 | 9.50E-06 | 1.69E-04 |
| cgd7_1910 |          |          |          |          |
| 2h        | 3.71E-07 | 1.80E-07 | 0.00E+00 | 3.85E-07 |
| 6h        | 1.51E-05 | 5.61E-05 | 1.17E-05 | 2.91E-05 |
| 12h       | 3.22E-06 | 3.19E-05 | 5.17E-06 | 5.84E-06 |
| 24h       | 1.05E-05 | 1.08E-05 | 2.77E-05 | 3.18E-05 |
| 36h       | 1.50E-05 | 8.52E-05 | 2.28E-05 | 2.19E-05 |
| 48h       | 3.72E-05 | 2.19E-05 | 3.76E-05 | 2.46E-05 |
| 72h       | 1.09E-05 | 1.15E-05 | 6.15E-06 | 7.76E-06 |
| cgd7_3000 |          |          |          |          |
| 2h        | 1.73E-06 | 1.20E-06 | 3.16E-07 | 8.51E-07 |
| 6h        | 1.76E-06 | 6.82E-06 | 5.71E-07 | 2.75E-06 |
| 12h       | 2.17E-07 | 2.34E-06 | 4.41E-07 | 4.62E-07 |
| 24h       | 2.70E-06 | 2.21E-06 | 8.97E-07 | 2.36E-06 |
| 36h       | 9.30E-07 | 2.80E-06 | 1.68E-06 | 5.96E-07 |
| 48h       | 2.84E-06 | 1.78E-06 | 1.26E-06 | 1.23E-06 |
| 72h       | 4.21E-07 | 9.01E-07 | 1.58E-06 | 1.50E-06 |
| cgd7_3140 |          |          |          |          |
| 2h        | 0.00E+00 | 0.00E+00 | 0.00E+00 | 0.00E+00 |
| 6h        | 2.86E-06 | 5.77E-06 | 4.01E-07 | 2.52E-06 |

|     |           |          |          |          |
|-----|-----------|----------|----------|----------|
| 12h | 1.34E-06  | 2.71E-05 | 3.19E-07 | 8.26E-07 |
| 24h | 1.05E-06  | 1.33E-06 | 1.13E-06 | 9.61E-07 |
| 36h | 4.51E-06  | 5.37E-06 | 5.32E-06 | 2.32E-06 |
| 48h | 4.73E-06  | 1.43E-06 | 2.23E-06 | 1.32E-06 |
| 72h | 5.10E-07  | 2.36E-06 | 8.87E-07 | 4.30E-06 |
|     | cgd7_4090 |          |          |          |
| 2h  | 0.00E+00  | 0.00E+00 | 0.00E+00 | 6.89E-06 |
| 6h  | 0.00E+00  | 0.00E+00 | 0.00E+00 | 1.98E-05 |
| 12h | 2.64E-03  | 1.29E-02 | 1.77E-03 | 3.82E-03 |
| 24h | 7.24E-04  | 7.46E-03 | 3.65E-04 | 1.15E-03 |
| 36h | 8.07E-03  | 1.87E-02 | 1.69E-03 | 8.79E-03 |
| 48h | 1.31E-02  | 7.35E-03 | 2.27E-03 | 4.06E-03 |
| 72h | 3.00E-02  | 5.55E-02 | 7.51E-04 | 7.07E-03 |
|     | cgd7_430  |          |          |          |
| 2h  | 1.91E-06  | 1.42E-05 | 3.49E-07 | 5.37E-07 |
| 6h  | 1.69E-06  | 6.34E-06 | 1.05E-07 | 3.31E-07 |
| 12h | 6.30E-06  | 6.75E-06 | 3.65E-07 | 0.00E+00 |
| 24h | 1.01E-06  | 2.93E-05 | 6.17E-06 | 4.93E-06 |
| 36h | 3.17E-06  | 3.33E-05 | 2.84E-06 | 1.21E-06 |
| 48h | 5.36E-06  | 3.12E-05 | 1.19E-05 | 1.48E-05 |
| 72h | 5.92E-07  | 2.35E-05 | 4.66E-06 | 1.74E-05 |
|     | cgd7_50   |          |          |          |
| 2h  | 0.00E+00  | 0.00E+00 | 0.00E+00 | 4.78E-09 |
| 6h  | 8.07E-08  | 1.70E-08 | 7.64E-07 | 5.61E-07 |
| 12h | 6.36E-08  | 7.60E-07 | 1.72E-07 | 2.18E-07 |
| 24h | 2.49E-07  | 4.91E-07 | 1.85E-06 | 3.77E-07 |
| 36h | 2.63E-06  | 9.85E-07 | 1.04E-06 | 7.35E-07 |
| 48h | 1.96E-06  | 9.61E-07 | 2.10E-06 | 3.22E-06 |
| 72h | 2.01E-06  | 6.60E-07 | 2.12E-06 | 1.43E-06 |
|     | cgd7_520  |          |          |          |
| 2h  | 8.85E-08  | 1.22E-06 | 2.03E-07 | 1.50E-06 |
| 6h  | 1.17E-06  | 1.56E-06 | 6.43E-08 | 7.35E-07 |
| 12h | 1.79E-08  | 3.61E-08 | 3.49E-08 | 2.08E-07 |
| 24h | 5.61E-07  | 4.41E-07 | 5.21E-07 | 2.25E-07 |
| 36h | 3.61E-07  | 5.06E-07 | 3.78E-07 | 2.01E-07 |
| 48h | 9.61E-07  | 3.41E-07 | 1.31E-06 | 4.34E-07 |
| 72h | 2.52E-06  | 8.37E-07 | 1.66E-06 | 2.37E-06 |
|     | cgd7_5260 |          |          |          |
| 2h  | 0.00E+00  | 1.77E-05 | 0.00E+00 | 6.42E-03 |
| 6h  | 0.00E+00  | 5.33E-05 | 2.32E-02 | 3.76E-02 |
| 12h | 1.88E-01  | 1.15E-05 | 0.00E+00 | 1.08E-02 |
| 24h | 1.18E-01  | 4.41E-04 | 4.33E-02 | 4.25E-02 |
| 36h | 4.27E-01  | 5.28E-03 | 3.50E-02 | 6.57E-02 |
| 48h | 4.18E-01  | 2.70E-02 | 1.08E-01 | 7.82E-02 |
| 72h | 6.10E-01  | 9.85E-03 | 7.07E-02 | 2.06E-01 |
|     | cgd7_710  |          |          |          |
| 2h  | 0.00E+00  | 0.00E+00 | 0.00E+00 | 0.00E+00 |
| 6h  | 0.00E+00  | 0.00E+00 | 0.00E+00 | 0.00E+00 |
| 12h | 3.08E-05  | 1.16E-06 | 1.37E-04 | 3.67E-06 |
| 24h | 1.38E-05  | 6.27E-07 | 2.85E-06 | 3.49E-06 |
| 36h | 8.82E-06  | 1.35E-06 | 1.59E-06 | 1.21E-05 |
| 48h | 2.31E-05  | 2.10E-06 | 6.35E-06 | 8.95E-06 |
| 72h | 7.42E-05  | 6.00E-06 | 2.80E-05 | 4.95E-05 |

|     |           |          |          |          |
|-----|-----------|----------|----------|----------|
|     | cgd8_310  |          |          |          |
| 2h  | 0.00E+00  | 3.01E-08 | 0.00E+00 | 1.67E-05 |
| 6h  | 6.45E-05  | 1.56E-06 | 7.90E-06 | 5.82E-05 |
| 12h | 4.19E-02  | 8.43E-04 | 3.73E-03 | 7.13E-03 |
| 24h | 8.19E-03  | 3.09E-04 | 3.45E-04 | 1.18E-03 |
| 36h | 1.98E-03  | 9.47E-04 | 2.95E-04 | 1.99E-03 |
| 48h | 1.64E+00  | 3.81E-05 | 9.49E-05 | 7.29E-04 |
| 72h | 1.07E-03  | 1.10E-05 | 1.74E-04 | 1.15E-03 |
|     | cgd8_1090 |          |          |          |
| 2h  | 2.80E-04  | 1.48E-06 | 8.26E-07 | 1.02E-04 |
| 6h  | 1.54E-05  | 3.88E-08 | 0.00E+00 | 0.00E+00 |
| 12h | 2.91E-04  | 5.34E-06 | 1.09E-05 | 3.73E-05 |
| 24h | 3.15E-04  | 2.54E-06 | 2.39E-05 | 3.09E-05 |
| 36h | 3.06E-04  | 8.87E-06 | 6.85E-05 | 1.11E-04 |
| 48h | 2.66E-04  | 2.01E-06 | 1.28E-04 | 8.02E-05 |
| 72h | 4.14E-04  | 6.05E-06 | 1.49E-04 | 1.33E-04 |
|     | cgd8_1150 |          |          |          |
| 2h  | 3.14E-06  | 7.56E-07 | 4.56E-07 | 6.68E-06 |
| 6h  | 1.44E-06  | 5.59E-07 | 1.51E-06 | 4.40E-06 |
| 12h | 8.63E-08  | 2.14E-07 | 0.00E+00 | 1.18E-06 |
| 24h | 2.19E-06  | 5.75E-07 | 2.73E-06 | 2.06E-06 |
| 36h | 8.72E-06  | 3.16E-06 | 7.80E-07 | 4.31E-05 |
| 48h | 1.69E-05  | 3.33E-06 | 4.27E-06 | 6.82E-06 |
| 72h | 1.42E-05  | 2.76E-06 | 1.06E-05 | 8.40E-06 |
|     | cgd8_1890 |          |          |          |
| 2h  | 0.00E+00  | 2.25E-07 | 4.35E-07 | 2.59E-06 |
| 6h  | 1.00E-05  | 5.56E-07 | 1.48E-06 | 2.34E-06 |
| 12h | 1.21E-06  | 6.98E-07 | 9.17E-07 | 7.71E-07 |
| 24h | 3.55E-06  | 9.04E-07 | 2.89E-06 | 5.13E-06 |
| 36h | 4.87E-06  | 2.81E-06 | 2.37E-06 | 2.69E-06 |
| 48h | 7.27E-06  | 8.34E-07 | 1.87E-06 | 3.62E-06 |
| 72h | 1.64E-06  | 1.28E-06 | 4.05E-06 | 4.35E-06 |
