# Supplementary material for: The Cryptosporidium Parvum Transcriptome during In Vitro Development
Source: PubMed Central journal article supplement (PMC3305300; doi:10.1371/journal.pone.0031715), 2012-03-15
Supplement: pone.0031715.s005.pdf [file pone.0031715.s005.pdf]

| Plate | Gene      | Left Primer Sequence        | Right Primer Sequence       |
|-------|-----------|-----------------------------|-----------------------------|
| 1     | cgd2_1060 | TAATGGGTTTCGAGAAGAAATGG     | TGAGCTATGACAGTAAGGGCAA      |
| 1     | cgd2_1100 | CACATCAGGTAAGGAGCATCA       | TCCATTGCTTCGTGAATAGAAA      |
| 1     | cgd2_1110 | CGCTCCTTACCTAAATCTTCCC      | CTGATTCTTTCCAATGACGGTT      |
| 1     | cgd2_1150 | ATCTCTTTCCATCTGCCACTTC      | ATCAGCTCTGCAAACATACCAA      |
| 1     | cgd2_1160 | TCTGACTCTCAAGCCAATGAAA      | TAATTGAACCAGCTCACCAGAA      |
| 1     | cgd2_1170 | AGGTGACTCTGCAACATCTGAA      | GCCAATAAAGCTATGGTCTGCT      |
| 1     | cgd2_1190 | ATAATGGATGCAACTCCCGAA       | CGCGTTTACAATGCTGAGAAA       |
| 1     | cgd2_1200 | TGTGCTACTTGTTGGCTTTACAC     | GGTACAATGGCCTTCCTATGTT      |
| 1     | cgd2_1220 | AATACCCACTAAGCCCAACAAA      | AAATGTTCCCTCCTCCCTATC       |
| 1     | cgd2_1270 | GAGATTCCTCCTGGTTTGTTG       | TAAGCTCTTCTGGGCATGAACT      |
| 1     | cgd2_1290 | CATGTTCTCATTTGGATTTACAGG    | TTCAGGAGATGGACTTGATGG       |
| 2     | cgd2_1310 | CCAAGTGGAGCTAAATGCAA        | TCCACCTCCTAATACCGAAAGA      |
| 2     | cgd2_1350 | AAATGAGGGTGAAGGTATGGAA      | AATCCAATGACAGGGAGAAAGA      |
| 2     | cgd2_1370 | CAAGCAATACCAACCACAAAGA      | ACAGACTTCTCGATTCCCTGACAA    |
| 2     | cgd2_1450 | ATTGGAGGCATTACAGGTGACT      | TGGCAGTGTGCTAGTAAGGAAA      |
| 2     | cgd2_1470 | GCAGCAGGAAGAAGTCAAGTAAA     | TGCTTTCCAATTCGCTATCC        |
| 2     | cgd2_1490 | ATCGTACAAGGGTGTGTTTCATT     | ACAAGAGATGGCAGTGTCTCA       |
| 2     | cgd2_1510 | GCAAAGTTCACAATCCAAGATG      | ACCATTTATTCCCATGCAGTTC      |
| 2     | cgd2_1520 | CAGTTTATTCCCTCCTGGGATTG     | TATTGGCCTGACTTGTGCGATT      |
| 2     | cgd2_1530 | GGAAATAGATGGAAAGCAATAGGA    | CGAGCAATATGCCTTGAATAGA      |
| 3     | cgd2_1610 | CTCCTTGGCTGCTATGCTAACT      | GCAATATGCTTTGCCAATAA        |
| 3     | cgd2_1620 | TGAGATGCAACGAACACAATAA      | ATTCCCTTCAAATCGCTCAA        |
| 3     | cgd2_1740 | GTTGTAATGCTAACGCCCATTT      | AACCTCATTTCTCTCCCATTCA      |
| 3     | cgd2_1760 | AATATGATTCCGCCTTCATTACA     | TGCTTGATGATTCTTTGCTTTC      |
| 3     | cgd2_1800 | AATGAAGGGATGCCAATAAAGA      | CTTCTTCTGCTCTGGTGTGAGA      |
| 3     | cgd2_1830 | CTGAAGCATTGGACAGAAAGA       | TTGCGACTTTAATTGGGTTATG      |
| 3     | cgd2_1850 | GAGGCCATTAAACGTAATCCAA      | AACTTTGGGTCTAAATCGAGGG      |
| 3     | cgd2_1910 | TGGTGGTTCAGAGAATGTTGTT      | CATCCCACGATCTTTGTTACTG      |
| 3     | cgd2_1920 | CAGCCCATTATTCATCAGAAAGT     | TGTGGTAAATTCGGCTATCAAG      |
| 4     | cgd2_1330 | AAGAATCCCAAGAGGAACGAA       | GTACAACAATTTCTCCGCCAA       |
| 4     | cgd2_1340 | TCCAAGTTCAGCTACTTCACCA      | TAAAGGGTATCTTTGAATGCGG      |
| 4     | cgd2_1380 | GATTCTGAGCTGCCTCCATT        | CTAAATGCAACCCTCTTATTACACTTT |
| 4     | cgd2_1410 | TATTCAACCATTCAACACCGAA      | TTCTTTGTGAGATAATTCCGCC      |
| 4     | cgd2_1420 | AAGAGGAAGAATATCGTAGGAAACAAG | CGGGTGGTTATCAATACATTCC      |
| 4     | cgd2_1430 | ATCCACTATCTCAGCCACCATT      | TTGCTCATTCTGGTCTCTTTCA      |
| 4     | cgd2_1440 | AGAATATGCAATGGAGGCAGTT      | GCAAATGCAAGGCAAGTATTATC     |
| 4     | cgd2_1500 | AGATCCTATTGAACCAGCAGCA      | ACCAATGCACTAGCCAGCTTT       |
| 4     | cgd2_1590 | ACGATAGGGAGCTATGAATGTGA     | CAACGTGGAAGTGGACAAACA       |
| 4     | cgd2_1680 | TGGCACATCAACTAGCCAAA        | CTACAAAGAAAGGGATTGCTTGA     |
| 4     | cgd2_1690 | GTGTCAGTCGCCACCTCTTT        | CCCACACTTTGAGCTGTTTGT       |
| 4     | cgd2_1700 | GGTATGCAACAAGATCCAGCA       | ATATAGCCATCTCCGTTAATATCCAGT |
| 5     | cgd2_1710 | TATTAACAGCGAGGAAACTGGG      | TTCTTCTTGCGGACTAGCAA        |
| 5     | cgd2_1730 | ATATTCAAGCTCGCTGCCAA        | TGAGTCTAACCAAGAAATCGGG      |
| 5     | cgd2_1750 | AAAGGGTGCTCAGTTCCAAAG       | TCAATGTAGCCAATTTCTTCGTC     |
| 5     | cgd2_1810 | AAAGTGGTCATTTCTGCTAGGG      | CTGCTGTTGTGACTGGAGAGTT      |
| 5     | cgd2_1870 | CTTTGCTTCTCGCCTTGTAAGT      | ATTCTTTATTGGAGCTGGTGGAA     |
| 5     | cgd2_1880 | TAGGAAGCTGCGATTACAATGA      | CAAGTGCCAATAGTTCAGCAAG      |
| 5     | cgd2_1900 | AACCAGAAGCTGTTATGATGAGG     | TAGGCAATTCTTGATTGAGCAG      |
| 5     | cgd2_1940 | AGAACTATTCGTCTTCAACTATGGG   | GTCGATCTATTCGTGATGTCGT      |
| 5     | cgd2_1950 | GGACAGAAATGGTTGGAGTGA       | TTGGAAGTGGAGGAGTGTGAGG      |
| 5     | cgd2_1980 | ATCCATCTGAAACTTCCTCCAA      | CCTCATCTCCTAGCACAATTCC      |
| 5     | cgd2_2000 | TTGATGATTCTCGATGTTCTCTG     | TCCTTTGAGGCCAGAGTGTAGT      |
| 5     | cgd2_2020 | AATCCTACATTAGTCGATGGGTATG   | TGGAATCTCTTCGTCTCTCCTC      |
| 6     | cgd2_1280 | CCTTCGTCACTGGTTGTAGAGA      | GTTTCTTCTGTTTGCATTCA        |
| 6     | cgd2_1550 | GAATCCCTCAGCATAATTCAACA     | TCTTCTGCATGGTCGAGTCTAA      |
| 6     | cgd2_1780 | AATTCACAGTCCTCCCAAGAAA      | TTCTGCACCTTTTCGATAAACT      |
| 6     | cgd2_1820 | CCGGAGGCTAGACAACGTAA        | GGAATGAAGTAACGATGGGTGT      |
| 6     | cgd2_1840 | TGGAAGAAGACGAAAGGCATAG      | TTGATCTTGTGGGATCTAAGGG      |

|              |                             |                            |
|--------------|-----------------------------|----------------------------|
| 6 cgd2_2040  | GACTTTCCTTCGAGAGTTGGG       | TCTTGTGTAGAAGCTCGTCCTC     |
| 6 cgd2_2060  | TTCAATTAAGCGGGAGTCAAA       | GTTGTATTTCCCAATATCGCAAG    |
| 6 cgd2_2100  | AAGTTCCTAACACTGCTCCTG       | AGCATCTGGGCGTATAACAACT     |
| 6 cgd2_2130  | CTTTGGTCTGGTAGAGGGAGAA      | ATTTGAATTTGAGCCATCACCT     |
| 6 cgd2_2140  | CAACTACTTCCAAACCAATCCC      | TTAATAGTGGCATTTCGGATGA     |
| 6 cgd2_2160  | CTAAATTGGGACTTGAATTGG       | GTTTGTTCATTTTCATCAGTGTGG   |
| 7 cgd2_2210  | TGCGCTACAACCAGATAACAAG      | TGCCTTAGACCTGACTATTCTCAA   |
| 7 cgd2_2220  | TATTTGATGGGCCTTTGTCTTT      | TGTTTGTGTGTGTAGCATTGATT    |
| 7 cgd2_2230  | ATTGGTTCAAGAAGAGACGAGG      | TGAAATGCTACTTCCTCCCAG      |
| 7 cgd2_2260  | CCAGTCCCTGAAATAGGAAACA      | TTGTCGTTCCATCCACCTTT       |
| 7 cgd2_2270  | ACTATTTGAGTGGTGGCTTGGT      | CTTGAATGCGTTTCACCTTGAG     |
| 7 cgd2_2280  | TTTATCCATAGAAGAGCAGGGAGA    | CAAAGGAAAGTCCGAGATTTGA     |
| 7 cgd2_2290  | GTGAAGCCAATTTATATCCCAATC    | CAACTATTTGCTCAACCTTATCC    |
| 7 cgd2_2320  | GGGACTGCACAAGTAATGTCAA      | ATCTCTTCTGCCAGATAATG       |
| 7 cgd2_2340  | GCAGGAGCAGGAGTATTTAGT       | TGGCAATCTTCAATTATACAGCC    |
| 7 cgd2_2350  | CTTCTAGCGAAGCCAATTCAGT      | AGGCGATAATAAATTCAACCCA     |
| 7 cgd2_2360  | TATACAAGCTATGGAAACGCCA      | ATTAAGGCAACTAATCGCTCCA     |
| 7 cgd2_2380  | TTAGTAGTGCTTTATTCAGCGATGTT  | TTCAGTACAATGCGTAGATGGTG    |
| 8 cgd2_2390  | AAGTAAAGCAAGCAAATAACACCT    | AGCAATCATCAAAGTATGGCTG     |
| 8 cgd2_2410  | CTCTCCATTGATAACTCCTTGTGA    | AATGCGTGTTCCTTGGTATTGA     |
| 8 cgd2_2430  | TCGAACCCAAAGATTGCTAAA       | GATGTTGAAGTCTGCCTCCTG      |
| 8 cgd2_2450  | GTTCAATTTCTTCTCCACACAG      | AGAAGTATCAGCATTGACCCAC     |
| 8 cgd2_2460  | GCATGATCTCCTTCCAATTCA       | CGTCATCACCTAAATTCTTATTCTCA |
| 8 cgd2_2480  | CAAATGATGACACAAGAATGGAG     | TTTCGTTTAGGAAGGGATTGTC     |
| 8 cgd2_2490  | TCGTCTAAACAAAGACTAAGCGTC    | CATAATCCGCAAATACAAGTGG     |
| 8 cgd2_2500  | AATCGGCATAGATTTGGATATTG     | TCTCCGTTACTTATTAGCATCCCT   |
| 8 cgd2_2510  | TTCGTAAACCCAATCATGTCAA      | AATGTGCCTTCCACAGTTCTTC     |
| 8 cgd2_2530  | CGCCCTATATCCCAGTAGTTGT      | TTTCATTGCCAGTTTCTGATGT     |
| 8 cgd2_2540  | GTGTTATATCGAAGAGTTATTGCC    | CCACTTCCAGTTAGCTCCCTAC     |
| 8 cgd2_2580  | TTCACATACCACCTGTCTTTGG      | TCAACCATTATCCCAACCCTAC     |
| 9 cgd2_2590  | AAAGAGTGGGAATTGTATGGAAGA    | GCAAGTAGCAACGAAGAACCA      |
| 9 cgd2_2610  | TATCAGCCCATTCAACTAACCC      | ACATTAGCCAAGATCGCAGTTT     |
| 9 cgd2_2620  | ATGAAGGTGAAGTGGATGTGG       | CAAATTCGGTATGCCTGTAAATAA   |
| 9 cgd2_2630  | TTTGCTGTCTTTGAAGGGTCTC      | ATGAGCCGCACTTATTCATGTT     |
| 9 cgd2_2650  | TGGATACTCAATCGTTCCTATTACTG  | ATTTGTGATGTGTGCTTTGCTC     |
| 9 cgd2_2660  | GGTTTCTCTCCGTTTCGATTGT      | AACGCGAATCTAGGAGTCATTT     |
| 9 cgd2_2670  | GCGAAGCATTCAAAGAGAGAA       | CTTGCTGGATAAGTAACGCTCA     |
| 9 cgd2_2680  | GTTTAATTGGCATGAAGCTGTG      | GATCCTGGGAAGCTGATAGAGA     |
| 9 cgd2_2690  | TTTCGAGTCTTCTACACTGATTATGG  | CCTAGCTTCTTCCAATTTACTGGTT  |
| 9 cgd2_2700  | CCAAAGAATCAGAGGAACGAAG      | AAAGGTTGAAATTGTGGCAAAG     |
| 9 cgd2_2710  | GGTACAGCAGAAAGCATATTACCA    | TTAACAACGCTTGAATGTAGCC     |
| 9 cgd2_2720  | AGATTATTGCTTTGTGCCTTCTG     | ATTCTTAATTGCGATCTTTGCC     |
| 10 cgd2_2730 | CTGAATCTAATATGGCGTCGGT      | CTTTCCCGTTCGAGTGTGTATT     |
| 10 cgd2_2750 | ATGGCTGCGTTAGCACTACTTT      | TTCAGGAATTTGGCTATGGACT     |
| 10 cgd2_2760 | TGTGAAAGAGCGTATTGGACAC      | ATGCTGAATGACAACCTCCCTT     |
| 10 cgd2_2770 | TGCAATCATCAAAGGAACAGAG      | ATTATGCAGGCAACTGAATGTG     |
| 10 cgd2_2780 | TGTTTGCTGGGATTGATAAGTG      | TTTAATGGTGGAAATCTCGTCTG    |
| 10 cgd2_2790 | GAGGAAAGAATTGAAAGGCAAA      | ATGGGTCGTAAACAACAGGTC      |
| 10 cgd2_2800 | GAAAGCATTGAACTAGAGACAAAGAAG | CCAAAGCAGATGGCTTATCATT     |
| 10 cgd2_2810 | TTATTCCGCAGTGAAGATGAGTT     | AATTCCTTCTCCTTTCTGTTTC     |
| 10 cgd2_2840 | CCTGAGCCTTTAATCACCATC       | AAATTCATTACGCAAGTTTCA      |
| 10 cgd2_2860 | AAACCAGTCTTTCGAGGCTTAGT     | ACAATTAACCAATCGCCTTCC      |
| 10 cgd2_2880 | TTCCGTAGTTTGGAGAGATCAAG     | GCATTGGAAGGAGAGATAGGAG     |
| 10 cgd2_2890 | TGCGACATATTTAACACTTAGACGA   | AAACTGACAAAGCAATCCCAAG     |
| 11 cgd2_2930 | CATTGGAAACAGAGTGGTTGG       | TACAAGAGCATAGGCAGGAACA     |
| 11 cgd2_2940 | TCTAGTAACCAAAGGAGGGCAG      | CCACCTATTCCCAGAGAGTTTG     |
| 11 cgd2_2960 | CTCAGAATGACAGAGATGCTCAA     | GATCCGCCAAAGGTTTATAGTG     |
| 11 cgd2_2970 | CGTCCAATTAAGGGAGAAGTTG      | TTTCGGGTAAAGCTGACTGG       |
| 11 cgd2_2980 | CCCACAAGCAGTCTTACAACAA      | TATGAAGGAAATGGAAGGGAA      |

|    |           |                             |                            |
|----|-----------|-----------------------------|----------------------------|
| 11 | cgd2_2990 | GGCTTTAGACCTGTTGGAATGT      | CATTGATTTGGAATGTCTCTTCA    |
| 11 | cgd2_3000 | TGCAGAGAAGGAAAAGGGATTAG     | ATGTGTAACCACCACCTGACAC     |
| 11 | cgd2_3010 | GGAGATAAAGGAACGGGAAAGT      | CTCAGCTCTTGACTTCTTGCTG     |
| 11 | cgd2_3020 | TTAACGCAGTTTCATCGTGTG       | GACTCCAAATCCTCATCACTGTC    |
| 11 | cgd2_3030 | TAACTCTGATGACGAACCACCA      | GCCTCTACTGCTCTTTCTTGTC     |
| 11 | cgd2_3040 | CTTCTGCATCAACTCTTGAAA       | CATGACACTGGAATACTCGAAACT   |
| 11 | cgd2_3050 | TGCATTCAAGTGGAGGTCAAA       | AAGGTTCTACACCCACGCAAG      |
| 12 | cgd2_3060 | GTGTATCTGTGCTTTCCTTGCAAT    | GCATGATCTCGGAATACCTCT      |
| 12 | cgd2_3070 | GAAAGGCACAAGAATTTAAGCAA     | TGTTGAGCAGATGGAGAAGGT      |
| 12 | cgd2_3080 | TAAGCGCATCTCCTCTAATTCC      | CCTGAACCTGCTCCAAATCTAC     |
| 12 | cgd2_3090 | GCTCAGGAACAGCCTTTGTAGT      | GAAACACTATCGCCAACAACCT     |
| 12 | cgd2_3140 | AATACTTCCACAACAACAACAACAA   | TCACTTATTCCACCACTACTTGA    |
| 12 | cgd2_3170 | GGAGACGAATACGAAAGAACCA      | TCTGCATTCTCACACATCTTCC     |
| 12 | cgd2_3180 | ATGGGAGCCAACCTCATTCTTT      | TAGTCCTTCTTAGCCCTGCTTG     |
| 12 | cgd2_3190 | AAGCAAGAGTACGGACCAGAAG      | TGAATGAATGAATCCAACCAAA     |
| 12 | cgd2_3200 | TCCTATTACTCTTTCCTCCGGTC     | AATGCCTCATAGACAAACTCAGG    |
| 12 | cgd2_3210 | CTTTCTGACTTCCCATCGGTT       | TCATTATCAAAGTTACGGATTGTGT  |
| 12 | cgd2_3220 | CCAGGAATAGACAAAGAGGTGG      | GGCTTTAGTTCTCCAACAATGAA    |
| 12 | cgd2_3230 | ATAACTGCCTCTGGAGAATGGA      | GAGCAGAACCCTTTGGAAGTAA     |
| 13 | cgd2_3130 | ATGGGAATTGATTGCTTCTGTT      | AGGACTTGTTGAGCATCTTGGT     |
| 13 | cgd2_3240 | CCATGTGAATGAAAGAGGGATT      | ATTGACCCATTGAGCAGAGTTT     |
| 13 | cgd2_3250 | GCACAACAAGCATTTAGCAGAG      | AGTGAAGAATCCCACATCATCC     |
| 13 | cgd2_3260 | GTGGTATTGATGAGGACTTTGGA     | ACTTCGACGGTAAATTGATTGG     |
| 13 | cgd2_3330 | CAGTCGATTTCCAGAGAGGAGT      | TTCTTCCCAAATGATCCAAAGT     |
| 13 | cgd2_3340 | GAACAGGAACAGGAACAGGAAC      | GTCTAATTGCCGATGGGATAAA     |
| 13 | cgd2_3360 | TCAAGGAGATTGGAAGAGGTAGA     | TCATGTCTCACGACTAGAATCCC    |
| 13 | cgd2_3370 | GAGCTGATTGACACTTGTAGAGAAA   | TGTTCTTTGTTGAAATTGGGAG     |
| 13 | cgd2_3400 | TCCTATCAAACCTGGCCTAATGAA    | TGCGCCTTCAGATACAAATAAA     |
| 13 | cgd2_3430 | AGCTAAGTGTTGTGTGGGTTCA      | CTTCTGCTGCCAATTCTCTCTT     |
| 13 | cgd2_3440 | AACTTTCCTTGGATTGACCACA      | ACGACGAAGAAGATGAAGAGGA     |
| 13 | cgd2_3450 | ACGTGTTATATGAATGCTGGGTT     | TGATATGGAGAAATTGCATCTGTT   |
| 14 | cgd2_3460 | AGCCATAAACCCAGATATGCC       | CAGACTTGCTTCCCTTTGGAGTT    |
| 14 | cgd2_3480 | TTTATGGTGCAGAAGGCTCTAA      | CAGGAAACCACATCAAAGAATG     |
| 14 | cgd2_3510 | GAATGCAACCTAATTGGCCTC       | GGTCTAAATCCAAATTCACAACCA   |
| 14 | cgd2_3530 | AGGACTAGAAGCAGGACTGGG       | CGACTCTGATTGCACTTGTTCT     |
| 14 | cgd2_3540 | ATCAACCAGCACATCATTCTTG      | TTCAAACAACATCACAAAGCC      |
| 14 | cgd2_3550 | ACTTCTGCTTCCACTTCTGCTT      | AACTTGTTGTTGTTGTTGCTGG     |
| 14 | cgd2_3580 | TTTATTGGGAGTAAGGGATGCT      | TCATCTTCTTACCATCTGACC      |
| 14 | cgd2_3590 | ATTTGGGTCTTCTTCGATTCA       | CACCTTCTTATCCATTCTGT       |
| 14 | cgd2_3600 | TGATCCACTTAACCTTTCTCCAA     | GGTCTGATCTAATAATGCTCTGAATG |
| 14 | cgd2_3610 | GAAACGAGTGTAGCTGAAGGAAA     | GATGCCCTTAACCGAAAGTAA      |
| 14 | cgd2_3620 | TTTATTTCTTACGCCAGCAACC      | AGCTCCAAATCTAATCTCGCT      |
| 14 | cgd2_3630 | TAACTGGATGAAGGAACGCC        | TCTCCTCTATATTTGCTCGCT      |
| 15 | cgd2_3640 | GGGTAGCTTTGGATTTGAGTTG      | CTTGAATAAGATGGACGCGAA      |
| 15 | cgd2_3650 | GGCGATTCTACAGACGAGGTAA      | TATGTGCTGAAGGAACCCAAA      |
| 15 | cgd2_3660 | ACTCCATCAGGCCAACAATAAC      | CATTTCCATTCTTGTATCCT       |
| 15 | cgd2_3670 | TCTCCACAAAGAACGTCAAGAA      | AAATCAACATCTCCAACAGTGAAA   |
| 15 | cgd2_3680 | CTTGAGAAAGAGGGTGAAGTGG      | GGACACAAATAAAGATCCAAGCA    |
| 15 | cgd2_3690 | TATGAATTTGGATGGCCTCTTT      | ATGAAATCTTCTCCGATGCTGT     |
| 15 | cgd2_3750 | ATCAAGGCCATCAACTCTTTGT      | TCACTGCTTTCAATTCATCC       |
| 15 | cgd2_3770 | GGTTGTGAAGAGTTAGTTATGATGGTT | ATTTGTTCCACCTCGGCTACT      |
| 15 | cgd2_3780 | ACAACCACCAGCATCTCATT        | ATGTATCATCCCTTCCACCAAA     |
| 15 | cgd2_3810 | ATTGAGATTGATGGAGATTATTACGA  | TAAGGGCATTATTATTGGGT       |
| 15 | cgd2_3850 | TCCTTCTCTTCTTCCAGCACTT      | TCATGCTCTTCAACTTTGCATT     |
| 15 | cgd2_3860 | TGGTGATAGATTTCCGATACCC      | CCTGCTGATAATGCTAATGCTG     |
| 16 | cgd2_3870 | AGGATCAAGTTCAAGCTCAAGG      | TTTCCCGCATAATCTTCTTGT      |
| 16 | cgd2_3900 | AACAACACTACGACAACAACCTCAGG  | TGGATTATTCTTGGTCATTTGAGA   |
| 16 | cgd2_3930 | TTTAGGGAGTACATTTCTTGGTGA    | AGGTGTCCAGTTTATGGAATCTTT   |
| 16 | cgd2_3950 | TCAACTGATGCAGGAAGAAAGA      | TGTTGGAATCACAGAATCCAC      |

|              |                          |                            |
|--------------|--------------------------|----------------------------|
| 16 cgd2_3960 | TGAATTTGCCAGACTTTATCCA   | TATTGGCTCGGTTCCATTATT      |
| 16 cgd2_3980 | CTAGCCCTGCCTCCATTAGTC    | GCTATCATTCTGCTCCATTTC      |
| 16 cgd2_3990 | TTGTTGTCTTTGGAGTTGATGTG  | ATGCTTCTGTGATTGCATCTTG     |
| 16 cgd2_4000 | ATATCCAGCGTATGCCGTTTC    | TGCAAACATGAAAGTAGAATAAACCT |
| 16 cgd2_4030 | ATTTCTCATGCTTCAATGGGTT   | AAATTACCAATCAATGTTCCCAAG   |
| 16 cgd2_4050 | TTCAGCTTCTTGTGCATTACCA   | GATCCATCCATCCATTTCATTTC    |
| 16 cgd2_4060 | TGAGAAGGCATTACCACATGAA   | GGGACAACAATACATAAAGGCAAG   |
| 16 cgd2_4070 | GAGATCCAGAGGAGCAGAAGAA   | GCACACTCAGAAATCACTCACC     |
| 17 cgd2_4090 | CCAAGCCTCCAAACAAAGATAC   | CTGTCTACTTCTTCATCGCTGCT    |
| 17 cgd2_4110 | GAAAGCTCTTGTTGCCACTCTT   | GATTTCCAGTGATTGCTTGTTG     |
| 17 cgd2_4130 | AGAGTCGTTTAAGGCGTCCA     | AGCTTCTGCTGCTTTCACAAC      |
| 17 cgd2_4150 | TTCTTATGCAGCTTTCCTACTT   | AGGTTCTGTGGAGGTTGTTGAG     |
| 17 cgd2_4160 | TGAAATAGGATGGAATGCAAGTAA | TTAAAGTATCAACAGCGACAGGAC   |
| 17 cgd2_4180 | CACCACCATCTGTAGTATTGCC   | CTGTTGATGCAAATCTGACCTT     |
| 17 cgd2_4190 | AAGTTACAAGGCGAGGGAAGA    | GGTAAACTACTGCATCCAACCAA    |
| 17 cgd2_4200 | TGGCAATCTATCATCCTCTCTGT  | TAATCGTCTTGGCTGTACCCTT     |
| 17 cgd2_4220 | AGTTTGTGAGGAGGTAATGGG    | CCAAAGTTGATTGGCTTCATC      |
| 17 cgd2_4240 | GTCAGGAATTAGGCCAGTCATC   | CCAGCAATAGCATCATACCAA      |
| 17 cgd2_4250 | CAAATCTTGGTATTGCGATTGA   | TCAGCCAGTTCATTTATGCTTG     |
| 17 cgd2_4260 | CATTGCTAATCCAACAACAGGA   | TCACCCAAGAAGCTACAGTCAA     |
| 18 cgd2_4270 | GCTCACTTCCCTAACTCCACCAG  | ACCATCTTGCCACTCTGTTCTT     |
| 18 cgd2_4280 | GAATCTTGGAAATTTGCGTAGGA  | TTGTTGAATACTCCATTGCCTCT    |
| 18 cgd2_4300 | AAGTTTGTGATGGGATTCAGG    | CAATTTACTACGCCAGAGCA       |
| 18 cgd2_4320 | GAGTTGAAGTTTCGGATTCTGG   | CAACAGGAGTTAGTTCGGGTCT     |
| 18 cgd2_4330 | GGACTTCTCTGACATTCTTTGAC  | ATTGAGCTGATCCCATTGGAAG     |
| 18 cgd2_4340 | TCATCTCATTACAGGCTCTTCAC  | TACAATCGACCAAATCCTCAA      |
| 18 cgd2_4360 | CACGATTGTAGCAACCAGTCTAA  | TCCAGAGTTCCCAATTAAGTCC     |
| 18 cgd2_4380 | ATTCCAGGTGAGCATCGAGTAG   | TGTTGTTGTTGTTGCTTGGT       |
| 18 cgd3_30   | GCCATTATATTTGGAGGCGA     | TTTAACCAACCCTGCACAAAG      |
| 18 cgd3_40   | TAACGCCCATTTAGGGATAGAA   | AAAGTCTCAACGGAAGTACCCA     |
| 18 cgd3_50   | AAAGGCCATCATTGGTATTGAC   | TTGCGAGCTACAGCATTTCTT      |
| 18 cgd3_70   | AAGTCAGGCAAAGAACAACAATC  | TTTGAAGAAATTAAGGGAGGAGAA   |
| 19 cgd3_80   | TTTACTCAACTCAAGATCACGCA  | CTTTATCATTTCGGGTTTCTCCA    |
| 19 cgd3_90   | ACGAAATTAAGGAAATACCGCA   | CTTCATCAGTTGGTTCAGCTTCT    |
| 19 cgd3_100  | TGTTTCCGAGTTTAGTCAAGCA   | AAAGATCCCAACCAGGAGAAA      |
| 19 cgd3_110  | ATGTGGTAACTGAGCTGATGGA   | CCAAACCTATCCCTTCCAAATAC    |
| 19 cgd3_140  | ATCAGAAGATGACGAGTTGGCT   | TTTGGATGACTGAATATGGCAC     |
| 19 cgd3_160  | CCAAATACTCAACCTCAGATCCA  | AGGTGTTGCTTTAGAGTGGGAA     |
| 19 cgd3_190  | AAATGTTTACCAAATGGGATGG   | ACTCTGTTGTTGTTGTGGTTGG     |
| 19 cgd3_210  | AATTAGATATGCCCGACTCCAA   | TTTCCAAGATTTAGAGTGTGAGT    |
| 19 cgd3_220  | AACTCAAACCTCACCAAACACA   | CCTGAACCTAACCTGCTCATATCC   |
| 19 cgd3_250  | AGAGAGTGCCATTTCCAAGAGT   | CTATCCAGTCCCATCTTCCATC     |
| 19 cgd3_260  | TAAGGATGGAGAGGAATCGAAA   | TTTGAATTGGAAGGTAGCTGGT     |
| 19 cgd3_270  | GGTGGAGGATATGCAGAAGAAG   | TTATTGAACTGGTTGGACGAAGT    |
| 20 cgd3_280  | GGTCAGTAAGCTCAGTTCGTCA   | TGGTCTTCTTGGATTGGTTCTT     |
| 20 cgd3_300  | ATACTTCATCGGCATCATCTCC   | TTCTGTCATAGCTCGTGACTT      |
| 20 cgd3_310  | GGCATCAGGAGAGGTTGTATCT   | ATTCTTTGCGTCATTCCACTTT     |
| 20 cgd3_330  | GTGGAGGAGCTGTTAAAGGAAA   | AATGCACCACTGCGTCTATCT      |
| 20 cgd3_340  | GCCATTCTTATTCTTCAGCAACTC | CAGATGAGCCTGGTAAACACCT     |
| 20 cgd3_350  | TTTCCAGCCTTAGTCACCTTTC   | CTTGGGAGTTGAGATGGAGTTT     |
| 20 cgd3_380  | TATGGCTACATCTCCACTCCCT   | AGCATCTGGGCTACTTCTTCTG     |
| 20 cgd3_390  | TGGGAATTATAGATGGGAGTTCA  | TCTTCACTTTCCTCCGTCTTCT     |
| 20 cgd3_400  | ACTCTATGAATTGTTCCCGTCC   | TTTCTGATTTGGATCTCACCTTC    |
| 20 cgd3_410  | TTCGCAAGAGGAAATAACGA     | TCCCACATCAATATAGCCAGAA     |
| 20 cgd3_420  | GAGAATATAGGTCTGGAAGCGG   | AGAAATCAAGCAACCCTCAACT     |
| 20 cgd3_430  | ATCCAGATGAGGAGAGGTTTCA   | TGTACGTTGCAGATTGAGCTTT     |
| 21 cgd3_440  | CTACGAGAACAACCACAACCAC   | ATAGGCGCTAGTCCTCACATTC     |
| 21 cgd3_450  | AGCCTTCCCACTTTATTCTCT    | GAAGATTGATTTGTTTATTGG      |
| 21 cgd3_460  | TTGAAAGGGAAAGTCGTAATGG   | ATCTCAAGTCCAAGAGGAGCAA     |

|    |           |                            |                            |
|----|-----------|----------------------------|----------------------------|
| 21 | cgd3_470  | CGTCGATTTATCCCTTGTTTGT     | TTAGGTTTGGACGCCAGTAATC     |
| 21 | cgd3_480  | CCCAGAGAGGATGAGAACTTG      | TTATTGGATTCTTCCATTTGCC     |
| 21 | cgd3_500  | CATTGGGTTCACTAAAGCAGGT     | GCGGAGCATCTAGTCAGTCTTC     |
| 21 | cgd3_510  | TATGTGTCTCAAGGATGCCAAG     | CACCACCAATAATAACGAAGCA     |
| 21 | cgd3_520  | ACCCAAACGGAAATAGAGAACA     | GAATTGCCAGAAGGATTGAGAG     |
| 21 | cgd3_530  | GCTTGATTGTAGCTCTTTGGCT     | TGCTGTTTGAGAGTTGGAGAAA     |
| 21 | cgd3_560  | TATCAATAGTCAAAGCTGCCGA     | TCAACCGAGTTTATGCCTTCTT     |
| 21 | cgd3_570  | TTGTACTTGTCTCAGCCTCTTCTG   | TCTTGAAGGAATGAATGGTTT      |
| 21 | cgd3_580  | TTGGACATTAACCTTTGGTTCTCC   | ACCTGTTCTCTACCCATCATCAG    |
| 22 | cgd3_590  | TATACCGTCAGGAAATGAGCAA     | CACAGAAGAGACAAATCACGCT     |
| 22 | cgd3_600  | GGCTCCATATCAAGTTTCTGCT     | CTACGTCCAAACCACTCCTCTC     |
| 22 | cgd3_610  | CCATACCACAATGGAAGGAACT     | AATGTTAATGCAAAGAAGAGCCA    |
| 22 | cgd3_620  | TTCTCTGTCTTCTTTCCTTCTCTAC  | TGAGATATAACAACCCAATAAAGGG  |
| 22 | cgd3_630  | AATAGGAGAATCATGCAGTGAA     | TTTGCCTTAGAAATTGAGGAAGAC   |
| 22 | cgd3_640  | AGTAATGGTTGGTTAGATACTGGTGA | ATTCCCTCAATTCTTCTGGTG      |
| 22 | cgd3_660  | TATCTGGAGGGAGCTTTGAGAC     | ATCGAATGCAGCTAGAACAACA     |
| 22 | cgd3_670  | GGATGGGTTTAGAGGAAGAGGT     | TGGAGTTGAGCTTGGGTCTATT     |
| 22 | cgd3_680  | GCAAATAGGAAGAATGGAGGAA     | ACCCTTTACTTTGAAGCCAACA     |
| 22 | cgd3_710  | CGCCTTATTCGGGTTTAGAAG      | CTGACCTTTCACCTCTATTTCA     |
| 22 | cgd3_720  | TGTGTAATCCAATTCAAGCAGG     | ACCATATCCTCCAACACCATTCT    |
| 22 | cgd3_730  | TAGGACTGATGTGGTGGACAAG     | TTGGATAAACTCTGAAAGCAACAG   |
| 23 | cgd3_740  | AATCCAGGCGCAGAATTTAGT      | GTGAGAAACCATCCAATATCCAA    |
| 23 | cgd3_750  | CTCCTACAGCTTCATTGGGAAC     | TGTCCGTAGCTCTGTTGCTCT      |
| 23 | cgd3_760  | GGCTTGTTCTAATTGCCTGTG      | ACTGAACTCTCGCTGTTGAATG     |
| 23 | cgd3_770  | GGGTTAAGAGGGTTTCTACTCCA    | GATGGCAAATAACAATCAACCA     |
| 23 | cgd3_790  | AAAGTGAAGAGGACGCCAAA       | TTCGTTCCAAATGTCAAAGAGA     |
| 23 | cgd3_800  | TGGGACAAATGGAGCTATAAGAA    | GATTCCTTGGACATTCACACAA     |
| 23 | cgd3_810  | ACATGCTCTGTTCCATTCTCAA     | AAATTCGGCTCCTTCTTACCT      |
| 23 | cgd3_850  | AAGTGAGACAGGATCAACACCTC    | GCTCGACATAATCAAGGAAACC     |
| 23 | cgd3_860  | CCAGAATGCTTGGAGAAGATG      | TGATTCCGCTAAGTTGGAGTTT     |
| 23 | cgd3_880  | GAGTTCCAAGTTTCTTCCAGCA     | AAGGACGTGATGGTTGAGTTTC     |
| 23 | cgd3_890  | TGTTCCCTTTATTTCTTGTGGAG    | AGGTGCATTTATTGGAGTTGT      |
| 23 | cgd3_930  | GGCTTGCATTCTTGAGGTTAGT     | TCCTTGTTCTCCATTATTCGCT     |
| 24 | cgd3_950  | TGAAGCTGATTTGGGCTACTTT     | CATGGTCTTGATCTTCTTCTGG     |
| 24 | cgd3_960  | CCTGAAGAAGAAATTAACGCC      | AATTGAGGATGGTGACAGTGATT    |
| 24 | cgd3_970  | GCAACAAACAGAATGATGGAAA     | CCAACCAAACATGAAAGGAGA      |
| 24 | cgd3_980  | CTGCGTTGTAGCAGTTGGTG       | CAATAGCTGATGATGGGTTTCC     |
| 24 | cgd3_1010 | AAGATTGCTTGAGAGGAGCAGT     | TTCGTATTCATTATTGGCTTTGA    |
| 24 | cgd3_1030 | GTCATCTTCGTCATCTTCGTC      | TACGCTGTTGTTTGCCATATTC     |
| 24 | cgd3_1060 | AATGGAGTTTACGGACAAGGAA     | CTTGATGGGAAGTTGTATTGGAG    |
| 24 | cgd3_1070 | GCATTAGATGGACAAGCTGAAGT    | AAACCAAGCAACCAAGGATAAG     |
| 24 | cgd3_1160 | CAAGGTCAAGATCGGAATCAA      | GATGATAAAGGTCCACTAGAACCAA  |
| 24 | cgd3_1200 | CATCAACTAGCAATGAGCATGAA    | ATAACTGCGTCACTCTCCAACA     |
| 24 | cgd3_1210 | CATTCTTGATAAGGCTGTTGGTAA   | GTCCAAGCTCATAAACTGAAATGA   |
| 24 | cgd3_1220 | GAAACCAAAGAGAAGGAGAGCC     | ATTTGAACCATCATCACGAACA     |
| 25 | cgd3_1230 | TCAGTCGAAGATTACGAGCAA      | AAGCCTCATCAGAAAGAACTCC     |
| 25 | cgd3_1250 | TGAATCGTATCTTGATTGACGG     | TCTAGCACCACGAGGAATCTTT     |
| 25 | cgd3_1270 | CTCGTCAAGTTCATCTCTGGG      | TTGCTGTTCTGTTAGTTCTGTTCTTT |
| 25 | cgd3_1280 | TACATCAATTTCCAGACCCTCA     | AATGCCTCAACTTTGTTCTCATC    |
| 25 | cgd3_1290 | CCAGCAAGATGTGTGGAAAGT      | CTTGAGTCACTGTGGAGAA        |
| 25 | cgd3_1300 | ACCAAGTTATTTCTGTTGCTCGT    | CTCAATCTCACCTGCATCAATC     |
| 25 | cgd3_1310 | ATCAACGAACTGGGATTTAGAGA    | TTGTTTCTGTTGCTCATTCA       |
| 25 | cgd3_1320 | GGTATTTGGATTTGAATGAGGG     | ATAAAGAGCTTGGTAGCAGAAGAAA  |
| 25 | cgd3_1330 | AAGGATGACAAGAAAGATGACGA    | CACTACCTGACGATTCAGAGTTT    |
| 25 | cgd3_1340 | GAAGCTCGTTTATCCCATTGTT     | TCTCTGCAAACCTCAACCTCTG     |
| 25 | cgd3_1350 | ATCAGCAAATCAGCTACGAACA     | TGGAGGTAGAGAGGACGAAGAG     |
| 25 | cgd3_1360 | GGTGGGAGAATATGAGGGAAA      | TCTTGAGGCAAATCTTTCGTG      |
| 26 | cgd3_1370 | TCGTAGACCAACAAGAAACGAA     | AAACCATTGTATCCCAACTGTCT    |
| 26 | cgd3_1380 | CAACATTGAGAGGGAAATCCTG     | AAATCTCTGAACGCTCCAAC       |

|    |           |                           |                             |
|----|-----------|---------------------------|-----------------------------|
| 26 | cgd3_1390 | GATTCGCGTTTGTGGAGTTT      | GCTCAGAAGTATCGCTTTGGTT      |
| 26 | cgd3_1400 | AGAATGGAGGATAGATGCGAGA    | CTTGGGAAGCTGTTGAAAGAAGG     |
| 26 | cgd3_1420 | GATTGTGGTGGTCTTGCTGTC     | TGGGCTAAGTCTATCTCCAATAACC   |
| 26 | cgd3_1440 | GGGAAATGGGAAGAAGTTAAAGA   | TCCTTCAATAGGCTTAAATGGG      |
| 26 | cgd3_1490 | TGGAAGATGGAGATTGTTGTTG    | TCATTAGCTTGTCTTGATTG        |
| 26 | cgd3_1510 | GAGGTCCACTCAAGCACAGTAG    | ACCATAAGTGCCTTCTCCAATC      |
| 26 | cgd3_1520 | CCCTGAGAGTTGTGTAATAGAATGG | TCCCAAATAAAGTAATCATAGTCGTTG |
| 26 | cgd3_1540 | TCCCAGTAGCAGGAGTTATGT     | TGGCTTAACTCACTCCCAAAGT      |
| 26 | cgd3_1560 | GGAATACTTACGCATGGATGGA    | TGGGAGAAGGAATTACACCTGA      |
| 26 | cgd3_1570 | CTGAATGGGATGATATGGTCAA    | GATCAGCAGAAGCAGCATAGAA      |
| 27 | cgd3_1590 | CACAAGGATGTTGCAGTTGAAG    | GGTGTTAATATGAGCGAACCCA      |
| 27 | cgd3_1650 | TGTTAGGGCAGTTTCTGGAGTT    | ACGATAGCATTTAGGAGGTGGA      |
| 27 | cgd3_1660 | AAGTTGTCCAAGGTCCCTCA      | GGGCATTTATTGTTACGTTT        |
| 27 | cgd3_1690 | CAGCTATTATTGTGGATGCTGG    | TTCTGTCTGATAACCCAATTTCA     |
| 27 | cgd3_1710 | TTTCTTCTGTTCTTTGGCATTTC   | CATTTATTCTGGCATCCTTTCTG     |
| 27 | cgd3_1730 | CTGTAGCTCTGCCTCAACAAGA    | CGGATAAATCTAAACCAACTCCA     |
| 27 | cgd3_1740 | TCCAAACATAAAGGGAGCAAGT    | TCTTCATCCTCATCCTCATCCT      |
| 27 | cgd3_1750 | CAGACGATGAAGAACTTCTACTACC | TGACTCTTTGCTGGTCAAATCA      |
| 27 | cgd3_1780 | AGGAATCTCCAGACCAAGCTAA    | TACAGGTTTCAAGTTTCAAGTTCA    |
| 27 | cgd3_1790 | CATTTGGAGCATGGAATAGACA    | CAGGGAAGAAGCGTTATTGAAG      |
| 27 | cgd3_1810 | ACTGCTACGGGTGCTATTCTTC    | GATAAACATTCTGCCACCTTC       |
| 27 | cgd3_1830 | AAGCAGTGGATCGAAGGATAAA    | ACTCTCTCATTTGGGCTTGTGT      |
| 28 | cgd3_1840 | AACTTTGATTTGGCAGGTGATT    | ATTGTGAGAGCCAGGAAGAGAG      |
| 28 | cgd3_1850 | TCCTGTTGGGATTACGAATGA     | AAAGATGTGCCAAAGAAAGCAC      |
| 28 | cgd3_1860 | GAGTAAGGGCTAGTGGAGCAGA    | AATTGGGCATTAACAGCAAAG       |
| 28 | cgd3_1870 | CTTTAGTTATGCCGATCCAACC    | GTGACCACATCCTCTACAATTCC     |
| 28 | cgd3_1880 | GATGTTGGCTTAACTGACTCCC    | CTGTTTCATGTTGATTTCCCAA      |
| 28 | cgd3_1890 | GAGCTGTTTGCTTTATGATCCC    | CTCCGGGTTTGAGAAATCTATG      |
| 28 | cgd3_1900 | CAAGGTTGTTAGCTCAGATGGA    | TTTCTCCAAAGCAATAAGTCACC     |
| 28 | cgd3_1910 | AGGAGCATGTTAATTCAAGGAAA   | TTGTTCCAAACGATCAAATCA       |
| 28 | cgd3_1920 | GATCGTGTGTTCTCAAGCATT     | ATGGAGTTGCCTTTCTATCACC      |
| 28 | cgd3_1940 | AAAGGCTGAGTTTGACGACATT    | AGCTTCTCCCTCCTCGGTATT       |
| 28 | cgd3_1950 | AAACAGGGATAGGCCACAG       | TTATTCCAGGCTTCATATTGATTTCC  |
| 28 | cgd3_1960 | ACGATAGGCAAGCTGATGAAA     | AATGTGCGAATAACATCGACAG      |
| 29 | cgd3_1980 | TCGGAGTCAAGAAGGGTAATGT    | TGTGCATCAAGAAGAGCAGTTT      |
| 29 | cgd3_2000 | TTATCCTGCTCCACAAGAGGT     | TCTCCAAAGTCCCTTACAATC       |
| 29 | cgd3_2010 | TATTTGCTACCATGCAATCCAG    | AAGATCAATCCCGTTGAAGAG       |
| 29 | cgd3_2030 | TCCATGTGAAGAGCTACGAAAG    | AAATTCCACAGAGTTTGGCTG       |
| 29 | cgd3_2040 | GGCCAAGATAAGCAGAGAAAGA    | TGGGAATTTGAACACAGAATCA      |
| 29 | cgd3_2050 | ACTCGCACTCTTTGGACAGTTT    | TCTACCTGCTCTTGGCTGTACTC     |
| 29 | cgd3_2060 | CTCAAGTAACAACCCAACGTCA    | AATTCACCACTAAGCCCTACCA      |
| 29 | cgd3_2070 | AAGAGGGTTCAGAGAAGATTTGG   | GGTGATTAGGTCCAACAGGGT       |
| 29 | cgd3_2090 | ATAACTTGGCGGATGTAGTCGT    | CTGTAACGATCAAGAGACGTGG      |
| 29 | cgd3_2100 | CCTGGGTAGCACGATTGTTT      | AACACCTTTCCTATTATTTGCC      |
| 29 | cgd3_2120 | CAAACACCTGGAGAAGGTAACA    | AAACATCCATCTGAAGCAACAA      |
| 29 | cgd3_2130 | AGGGCTCGAAACATGAACTAAA    | TTAATCTGGATGTGCAATGGG       |
| 30 | cgd3_1800 | CCTGGGCTAACTCTTGCAATAC    | CAAGTCTGAGGTCATTCCCAA       |
| 30 | cgd3_2140 | GCATTAAGTTGTTGGGATTGG     | GCTAGGAGTATTTGGGCTCTT       |
| 30 | cgd3_2160 | GCTAGTGGCTTCCCTGACATT     | GTAGTGGCTCTGAAAGGCTGAC      |
| 30 | cgd3_2170 | AAAGAAAGTCCCAAATCAGCAA    | GATCTACAATCAGGAGCCAACC      |
| 30 | cgd3_2200 | CCAAGTCAATATGCAAACAAA     | ACAAATCCAGCAACACAACAAC      |
| 30 | cgd3_2210 | ATACTCGGGAAGGACTCTCAA     | CCGCCTTTATCTCCAGAAACT       |
| 30 | cgd3_2250 | GAAGTGCCTGTGGAATTTGG      | CTCTGCCTCTTCTCTCTGCTTC      |
| 30 | cgd3_2280 | TGACATCTTTCCCATCTTTCAG    | CAGAGGAGCATAATTCCACAGTT     |
| 30 | cgd3_2300 | AATCCTTTAATCCCGTGACTTTC   | AAACAAACCAATATGGCAGGAG      |
| 30 | cgd3_2310 | TGGGAGACATGGAACAATTAGAC   | AATGCTGTGCCCTTTGTATCTT      |
| 30 | cgd3_2320 | AGATGTACCAAAGTCGCAGGTT    | CCTCAGCTATGTCTTCCAGTT       |
| 30 | cgd3_2330 | GCTGGTTTCCCTGATCTTACAC    | AAATACGCAGATTCCATTGACC      |
| 31 | cgd3_2340 | TTGATTGCTAATTCTAACCTTTCCA | TTCCCGAATAAATATCCAACCA      |

|    |           |                            |                           |
|----|-----------|----------------------------|---------------------------|
| 31 | cgd3_2360 | GTGTGTCGGTATATGGTGATGG     | ATAAATCTTGCACCCATTGCT     |
| 31 | cgd3_2370 | ATGTTGGCATCTCATATCCGT      | GCTGTAAACAATGCGAGTCATC    |
| 31 | cgd3_2400 | TGAGAAAGAACTGCACTCACAAA    | ATGCTGGAACTTAATGCCCT      |
| 31 | cgd3_2430 | CATCCAAAGAATTAACAGAAGTCAAA | AATTACTGAGGTGATGCTACACGA  |
| 31 | cgd3_2440 | GCAGGGCAGTTATCTCAAGAAG     | TTAAGACGCTCCAAATCCTCAC    |
| 31 | cgd3_2450 | GAAGCAACAAATATAAGTAAGGACGA | CTTCTAACACTAATTGAGGCCCA   |
| 31 | cgd3_2460 | TTGTTTGCACCTGGGTCAGTAG     | CGTTAGCAAGCGGTCTATTCTT    |
| 31 | cgd3_2470 | TTGTTGATAATTGGGAGGATTTG    | AGCTCTTGGCATCTTCTCTGTT    |
| 31 | cgd3_2520 | GACGTTTCGAGTCATTTGGATT     | AAGATTGAAAGCGGTGAAGAAG    |
| 31 | cgd3_2540 | AGGTAAAGCACCTCGTAAGCAA     | CGTACTAGCCTCTGGAATGGAA    |
| 31 | cgd3_2560 | CTTTGGGCAATTAGAAATCCTG     | TCAACCTCAATCTCAAACATCCT   |
| 32 | cgd3_2570 | CTTGGTAGCGGAATTGGTATTT     | GAATTAGATTTGGCATGTTCTTCA  |
| 32 | cgd3_2650 | CGAGTATTTGGAACCACCTCTG     | ATTTCCGTTTCATTGGGAGAA     |
| 32 | cgd3_2670 | AGCCCTGTTCTTGATGTATGCT     | TGAGATTCCTTTACGCATTTCTG   |
| 32 | cgd3_2690 | AACCGTGCTTGGAGAAGTTTAG     | GAATTATCTCAATCTCACCGCC    |
| 32 | cgd3_2770 | CATGGGATTTATTTGATGACGA     | TAACGAACATACAACCGAAGGA    |
| 32 | cgd3_2780 | AGCATATTACTCAATGGCACCC     | TACTGCTCCGTATAATCCACCC    |
| 32 | cgd3_2790 | ATTCCCTGTTGATGAGGTGTTT     | TTAATTGTTGTCGTTGCGTTTC    |
| 32 | cgd3_2820 | GGAAACTTGTGGGCATTGTT       | CAGGAGTATATCTAAGGCAGCGA   |
| 32 | cgd3_2850 | TAAATGCAAATGAAATGCCAAA     | CGAATGGTGAATAGCTTCTCTGT   |
| 32 | cgd3_2860 | CGAAAGGTTTGGACTATTGGG      | CAGAAACAGATTGATCCAGTACCAC |
| 32 | cgd3_2890 | GGAATACGTGCTTGATTGGTCT     | ACTACAGGCGGAAATCTTGTTG    |
| 32 | cgd3_2900 | CATGAATCTGTTACGTCATCCAA    | AAGAGTGCCTCCAGAGCAA       |
| 33 | cgd3_2910 | GCTTGTTAAGTGGCGTGAGAAC     | TACGAGCTTCTGCTTCAGTGTG    |
| 33 | cgd3_2930 | AAATACAAACAAATCAACCGGAA    | ATATCGTCTATGGAACCGGAAA    |
| 33 | cgd3_2940 | AAATAGCCGGGATTACACTTG      | AACTTCGCATCCTCTTTGTGA     |
| 33 | cgd3_2980 | TAGCTCAAACATAATCGGCCTT     | TCCCAGTTGGTAATAGTGGCTT    |
| 33 | cgd3_2990 | GGTCGGTAGAACCAAAGACACT     | CTTGACTGCTCCATCTCCATAA    |
| 33 | cgd3_3010 | TTTACCGAGGATTAGTTCTTTGTTG  | CGCTGAGTCTTCATCTGACTTG    |
| 33 | cgd3_3020 | TTGAGATTGGGAATGAGAATGA     | TGTTATGTTGTCTCTGCGATGTT   |
| 33 | cgd3_3030 | CAAACCTCAACCTGCACAATC      | ATGCTGGCGTTGTAAGACATAA    |
| 33 | cgd3_3040 | ATTACGAATGGATGGAATTTGG     | GAAGTAGCAGGATAACGGGTGT    |
| 33 | cgd3_3080 | CAGAGGTTAAGCAGGGAACCTG     | CAATTCTGGATCTCTTTGAGCTTT  |
| 33 | cgd3_3100 | GAACAACACTTCCAGCATCCC      | CATATTGGACAACCTCAAGGCAA   |
| 33 | cgd3_3110 | TGCAATACTCTTCATCCCAGAA     | TTCAGGAAATCCCATTGTAACC    |
| 34 | cgd3_2700 | TTTGGGAATTAGATTAGTTGAAAGGT | TGAGCCTATCTGCTTGTGTTGAG   |
| 34 | cgd3_2710 | AGATCAAGTCAAACCACCACCT     | GTACCATTTAAGCGGAGCTGTC    |
| 34 | cgd3_2730 | TGGCGGAAATGACTGTACTATG     | TGAAGATGACAGAATTGGGAAA    |
| 34 | cgd3_3130 | ATGGTAGAGGCAGATAGCCAAG     | AACCTTATTGGTACGCATTATC    |
| 34 | cgd3_3140 | TTCTTCTCAAATCCATCACCT      | TCCGATGTTGTGTACTTCATTCTT  |
| 34 | cgd3_3200 | GCGATATTTACAGAAGCGCAA      | ATGGATGCAAAGTTGAAGAACC    |
| 34 | cgd3_3210 | TCGTAAGCTCGGTTAGCTCAGT     | AGTGCTATGAAGTGTCCGTCC     |
| 34 | cgd3_3240 | AATCCAGGGAATCATCAACAGA     | GGTCGCTTTGACCGAATACA      |
| 34 | cgd3_3270 | CATAGGCTCTACAGTGAATGGGA    | TGGAAATCGAGTATTATGCCAAC   |
| 34 | cgd3_3320 | AATTAACAAGACGAGGCAATGA     | ATGTTGGAATCAGCAGGAATCT    |
| 34 | cgd3_3330 | CCTGCTTTCTGGTTGATACACA     | TGTTGGTATATGGATGATGGGA    |
| 34 | cgd3_3340 | GAATAACCAGACGGAAGTTTTG     | TACTGAGAGCTGGATGAGACGA    |
| 35 | cgd3_3350 | TTTAAGGTTTATTCGTGTCGGG     | GGTTGAAAGGCGGAAATGTTAGA   |
| 35 | cgd3_3360 | TGTTTACTTTGTCCCATCCTCC     | CAATGTCGTTTGAGAGTTGTTCTT  |
| 35 | cgd3_3370 | TTTATGCAAAGATCCCTCCAAG     | GAGTAAGAGACCGCAAATGGAA    |
| 35 | cgd3_3380 | GAAGATCACATCCGAAGAGGTT     | GCTTGCTGAAATAGCCAGACTT    |
| 35 | cgd3_3390 | GAAGCAGCAATGTGTCTCAAAG     | TCCAAACAAATATCCAAGCAAGT   |
| 35 | cgd3_3400 | AGAACTATAAGCCCACCACCAA     | TCTTAACTTGGGATGAAACGAAA   |
| 35 | cgd3_3410 | AATTCATCCGGGTCAGTCATAG     | AGAGAGAAGTCCGAAGAAAGCA    |
| 35 | cgd3_3420 | ATTCTGCTCTGCACCATTTCTC     | GATCTTCTAAATCCCTGCTCCC    |
| 35 | cgd3_3440 | GAAGCAATCAAGAAGGAACAGG     | AGCTGGCACAGTAATAACAGCA    |
| 35 | cgd3_3470 | TGTCAGGTATTGGAGATGAAGTTAGT | TCAGGGCTATCATTAAAGAGGAAA  |
| 35 | cgd3_3480 | ACTTTATGGTTGCGAGGACATT     | AAAGGTGGAGTAGAGCATTGG     |
| 35 | cgd3_3540 | AAGCAGATTACAATGGATGAAGG    | ACATTCTCGACATTTGTTTCAGTT  |

|              |                             |                            |
|--------------|-----------------------------|----------------------------|
| 36 cgd3_3560 | TCATGCAGATTCACCTGGCTAC      | GCAATAGCTGAAACAAATCCAAC    |
| 36 cgd3_3570 | TTTGGTGCAGAATGGTTGTAAG      | TATATCCTTGCCCTTGTGGTTT     |
| 36 cgd3_3580 | GGACTTATTGGCTTTCCTTCTG      | CTACCTTACCATCCTTGGCTC      |
| 36 cgd3_3590 | ATCCAGCCTACTCTTCTTAAACCA    | GGATGTGTCCAAAGTATTTCAATCA  |
| 36 cgd3_3600 | TTCTGCTGTAATGTTTGGAGGA      | AGTTGTTAGGGAGTTTCTTTGCC    |
| 36 cgd3_3610 | AGGGAGTGGGTTTGTAAGTTG       | AAGGACTATCTGTGTGTGAACCTG   |
| 36 cgd3_3680 | ATTCGCTTGGATATGGATGACT      | CCTGCTCCTGTTACTGTTCCCTC    |
| 36 cgd3_3700 | TTACAGAGGATGATTGGGTTAATG    | TAGCAAGACATACCGGAGGAA      |
| 36 cgd3_3710 | ACTCCTCACACAACGACTTCAC      | CTCTTCCAATCAAACATCA        |
| 36 cgd3_3740 | TTGCCCATGTGTTATTGGTATT      | GATTTGACAGTTGGTCTTCCATT    |
| 36 cgd3_3770 | CAAACATCAAAGAGTGGTGAGG      | GCTTCTCAAGGAATGGTGAGTT     |
| 36 cgd3_3800 | CAAATAATAGTAACAACGCAACATCA  | TCCATCAATAGAAGACGAAGCA     |
| 37 cgd3_3840 | TCTTAGCATGGACAACAACACC      | TCTGCTCCAATACAATCAGAAATG   |
| 37 cgd3_3860 | GGAGAGCTGATGAATGAGTTGG      | CTCTTCCGGTCGAATATCCTCT     |
| 37 cgd3_3880 | CGGTATCGGAAGAAGATGATAAA     | AGCACTTTGAATAGGATTTGGG     |
| 37 cgd3_3890 | GGCCAAGAAGGGTTCATCTAA       | ACCAAACGAGCAGTACCATTTT     |
| 37 cgd3_3900 | CCTATGATGACTTCCAATGCTG      | TATAGCTTACATCCGCCACTGA     |
| 37 cgd3_3910 | TCAGAAACCAACTTTACAGCCA      | GCTGAATTAGTATTGGAAGCGG     |
| 37 cgd3_3920 | AAGAGGAGCTGGTGGTACTGG       | AGCTGAACAGTGGAGATGATAGTTC  |
| 37 cgd3_3930 | TAACAAGACTGACAAGGCTCCA      | CCACTTAATACGCAGATACCACC    |
| 37 cgd3_3950 | CCTACTTAACTCTTTAATGAAATGGG  | CTGGAATGCTATCAGAACCAGAA    |
| 37 cgd3_3960 | GCTGGTCTGGAAGGAAGATACA      | TCATTTGGTAGTTGATCTGACGAG   |
| 37 cgd3_3970 | TGGTTTCCAACTTTACGTCTTCT     | ACTTGTTCCATTCTTCTCCTCTG    |
| 37 cgd3_3980 | ATCTGAATGGCAAGAATGTGG       | TCAAGTTCAAGCTCGGGTTC       |
| 38 cgd3_4010 | GGGTAACCTTGGTGATATGGGT      | TCTTACTCTGTGCTTCAGTCCAA    |
| 38 cgd3_4020 | TGCACTTATCAAATCCATTGTC      | CTTCTCAACCTTGCTTCTGAGTT    |
| 38 cgd3_4050 | TCAGACTAAACAATAAACACGGATTG  | TGGGTTCATATCTTCGTA         |
| 38 cgd3_4060 | TCTCTTGATTCTTTGGATTGGA      | GCGCATAATAACTGTAACCTTGACT  |
| 38 cgd3_4070 | ACATTTCCAGCGTTGTTATTCC      | ATTGACGATAGACCCATTCTCTG    |
| 38 cgd3_4090 | TTGTGAGCTTGATTCCACATTC      | AATACACGACGAGGTTGAGGTT     |
| 38 cgd3_4180 | GGAGGACAGTAAGCGAGGTAGA      | TCCATAACAGATCCAACCTCAA     |
| 38 cgd3_4200 | ATTTAGCATTGAGCATTGTTGGG     | GCGTCTCATCAATATCTTCCGT     |
| 38 cgd3_4250 | TAACCTCATTAGACGCGGAGA       | ACTCAACGCAATCTTCTGGTT      |
| 38 cgd3_4270 | ATGCCTCGAACCAAAGAACTAA      | GAGTTGCCTTTCTATTTGCATTTT   |
| 38 cgd3_4280 | AAATGATGAGGAACAGCAAACC      | TATATCGAACGTGCAGAGAGGA     |
| 38 cgd3_4290 | GACATTTAGTGGCATGGATGAA      | GAAATAGGATCTGGGTGGTTAGG    |
| 39 cgd3_4330 | GAAGAAAGCCGTATCTCAAAGAA     | GTCAAAGAAACAGTGGTGATGG     |
| 39 cgd3_4340 | GTATATGTGGGAATGACAGCGA      | CCAGCATCAAACCTCAATGA       |
| 39 cgd3_4350 | TATTTATGGGTTTGCCTCC         | GGTTTAAGGTGATTGCAGAAAGA    |
| 39 cgd4_10   | TTTCTTTCTCACCACCACCTTC      | CAACACTGATCTTCTGGGCTTT     |
| 39 cgd4_30   | ATCGTCAACACTGGTTCCTCTT      | ACCGCTCTTGCAATTTATTTCC     |
| 39 cgd4_40   | CTTAAACAATCCAATGAGGCAGT     | TGGGCAAACATATCGTAGTCTC     |
| 39 cgd4_60   | CATCTTCGATTGTGAGGCAA        | CTTCTCCCAGTAGCTCAGTTTCA    |
| 39 cgd4_70   | ATAAGAACATCCAGAGGCGAAA      | TTGTGGAATAAGTTGACGAGGA     |
| 39 cgd4_80   | CACCTCTTGTGCGTTCTTACT       | TCCTTGGATGTTAGCTGGTTCT     |
| 39 cgd4_100  | TCAATAGTTGCAGGTACGCTTAGT    | TCCGTGTGAGTGGTTTATCTGT     |
| 39 cgd4_110  | TTTATTGAGGAAATGGTGAGAAGTAGA | TAAAGCCTGGTTAAGCTCCAAA     |
| 39 cgd4_120  | GCACCTCAAACCTCATCTCAA       | TCCAGTATGTCCAGAATGTACCC    |
| 40 cgd4_130  | ACAGAAATCAGTGCATCAGGAG      | TTGTAACCAAGCTGTCCAAAGA     |
| 40 cgd4_150  | CCGGTGAAGGTGGTAGAAGA        | AGATAGAAGTGCTGCTTCCCAA     |
| 40 cgd4_160  | TCAAGCCACTCTAATCAAAGCA      | AACCTCTCCAAATCCTCAACT      |
| 40 cgd4_190  | ATTGAGAGACCAATTCAACGGA      | TTCTTATCATTGGGAGACCAA      |
| 40 cgd4_210  | CTGGAGCCCTGCTTAACTCT        | TTCTTCTTTGATGTTGGCTTT      |
| 40 cgd4_230  | AGGTGAGGAAATCTCAAACGTAA     | GTAACCTGACGTAGAGCTGAAGGAA  |
| 40 cgd4_240  | TCATTTGGAATTGTTTGTGAGG      | TGGCTCTTCATCTCCTGTTGT      |
| 40 cgd4_250  | CGAGGAACAGCCAGTAGAACA       | TCCATCCCGAGAAATTACCA       |
| 40 cgd4_260  | TGCTATCTGTGTGCTCGAAACT      | TTAAATCTTGTGCTGCCTGAA      |
| 40 cgd4_280  | CAACTTCTCCCAATCCCAAG        | TTGCTTGAACCTCAGAAAGGAAA    |
| 40 cgd4_290  | GAGTTATTATTGACGGCGAACC      | TGTAAGGGTATTAGTGCAGTTTCAAG |



|    |           |                              |                              |
|----|-----------|------------------------------|------------------------------|
| 40 | cgd4_300  | TTTGATTGGAGATCACAACTTT       | TTTCATACATTAACCTTCCCTCATC    |
| 41 | cgd4_310  | TCAGAATTTGTTGGCTCACATC       | TGATGAAATAACGGAATTAGAAGTTG   |
| 41 | cgd4_340  | GTTGTTACGGATAATTCAGGAGAAA    | TTTCGCTAACTCACTCTGGTCAA      |
| 41 | cgd4_360  | AAGCATGGATGAATTGAGTGTG       | TGAATGTCGTTTTCTGTGTCTT       |
| 41 | cgd4_370  | TGTAATCGCCGGATCTCTTATT       | TCCAAATTCTAAACATTCTTCGG      |
| 41 | cgd4_390  | TTGGTGCTTCCTTAATTCCAAA       | ATCTTCGCATGGGCTATCAA         |
| 41 | cgd4_420  | AATCTTTGCTGGGAGTATGTTTG      | TTTATTGTTTGCATTTCCACTC       |
| 41 | cgd4_440  | GGACCAGTTAATGCTGTTGAAGT      | CTGGAGGAAATACCCAAGAGTG       |
| 41 | cgd4_450  | TTGGAGAAGTTGAATTGGAAAGA      | TACGGACTGCAAATTAGGACAA       |
| 41 | cgd4_460  | AACTCAACCCGAATCCAAGTAA       | CATCCTTAACAGATTTCAATTCACA    |
| 41 | cgd4_470  | CCAAAGGGTTCAAATGTTGTCT       | AGGCTCTTCTACCTCTTGCCTT       |
| 41 | cgd4_480  | TCAGTTATGGGAGGTAGCGTTC       | CATTGCTTCATTCTTTCTTCC        |
| 41 | cgd4_490  | TGGCTTATGTTTGTGGTCTTTG       | CATTTGTCGTCCTCCTCTATCC       |
| 42 | cgd4_500  | TTGAATGTCCACCTGAATTTGT       | GAGGAGTAGCAGATGACCCTGT       |
| 42 | cgd4_510  | AATTCCTCATGGTACGGGTATG       | CCATTCAAAGCTCCTCCTACTG       |
| 42 | cgd4_540  | AGTTTGGAGCATTGACGATTT        | CTCAATTCCATTCCAGGGTCT        |
| 42 | cgd4_550  | GGACGATGATGAAGATAGAGCA       | AGCTGAAGATGGAGACCAAAGT       |
| 42 | cgd4_560  | TGTGTGCAGAAATAAACCAGAA       | TTTGGGAACTCAACAACCATC        |
| 42 | cgd4_590  | AATCACTCGTGTAGACTGCCAA       | CGTCCCAGAAGGCATAAGA          |
| 42 | cgd4_600  | ATTTGAGTATGGGTCTGGCTTG       | GCTGCATTCCATTGTTCACTT        |
| 42 | cgd4_610  | GTGGAGAAGGAGGTGAATACGA       | TCTCAAAGCATAAACAGGAGCA       |
| 42 | cgd4_640  | CGAGACTGGGAGATTAGATTGG       | AGCCAAGGAACTGCTGAAATAC       |
| 42 | cgd4_660  | TGACTCCAAATAAGGTATGGGTAAA    | TGCTAAGACACCAAATCCCAA        |
| 42 | cgd4_670  | TGCTCTTGAATTTGCTCCATT        | TCCCTTGAACAGACTTACCACA       |
| 42 | cgd4_680  | AGTCCATTGCATAGAAGAAGCC       | TGAGACCAAACCTCATCATCAC       |
| 43 | cgd4_690  | TCCGGTTTCTATGTTTGATCCT       | TGCATTCTAAATTCTGCCTCA        |
| 43 | cgd4_700  | TCAAAGATGGTTCATTGTGGAG       | GATCGAGAAAGAGCAAGCAAGT       |
| 43 | cgd4_720  | CTAGGGTCAGCCATTGAAGAGT       | CAAAGAAGGGATTTGGAGCA         |
| 43 | cgd4_730  | GGAGCAAAGCAAAGAATACTCAA      | TGGACTTTCAAGAGGCTTCAC        |
| 43 | cgd4_740  | TATGGCAGATGGTTCATTCAAG       | AGGAGCTGTACTCCCAATTTCTC      |
| 43 | cgd4_750  | GGAACCTCAGACCAAGATGAGT       | CCATTGATCCAAGTAATCCACA       |
| 43 | cgd4_760  | TGATGAAGATCAAATAAACTCACAAA   | GATTGGAGGATTGAGATGTGG        |
| 43 | cgd4_770  | AATGGGATTTGATGATGATTT        | TTGTATTTGCGCATTGTTATTGTT     |
| 43 | cgd4_780  | GGAAATAAAGGAAAGCGTACTCAA     | TTCCACCAAATGAATTACCTCC       |
| 43 | cgd4_790  | TGTC AAGAGGAAATCAAAGAGATATTG | GCACCTCCAGGGTTTGTCTATT       |
| 43 | cgd4_820  | CAGGAGGAGCTGATGGTATTG        | TTTCTAATTCGGTACTCTAGGGATGT   |
| 43 | cgd4_850  | GTGCTGGATGTATTTGGGATTT       | AAGGCAACTGAAGCAAAGTGA        |
| 44 | cgd4_910  | TTTGATATGAGAAACAGAACACAACT   | TCCTTGTAAGATTAGTTGACCCATT    |
| 44 | cgd4_920  | TCCTGCCGAATTTAGTCTTTGT       | TCTTGCTCCATGCCTAGAAACT       |
| 44 | cgd4_930  | AGATTAGGAGTTGTAGCAGCAGG      | TCCATTCCATGATAAACCATCTT      |
| 44 | cgd4_940  | GAGAAGATGAGGATGGGAAGAA       | AACCTCTTGGCTTGTTTGTAGTG      |
| 44 | cgd4_950  | ACAAGTGGTTGGGATGGAAA         | GATTTGTTTGATTGATGACCGA       |
| 44 | cgd4_960  | ATTCCCACAGGTAAGTCGAGAA       | GATCATTCCACCAGGGTATGT        |
| 44 | cgd4_980  | CTGTTAATACTGCTTCATCGTCAA     | GTAAGA ACTTGAATCTTGAACCTGAGT |
| 44 | cgd4_990  | TCAGGAGGATTTGGTGTGTT         | TCTGAAAGTTGATTACTCCCACC      |
| 44 | cgd4_1050 | AGACTTTTCATCCTAAAGCATTATC    | AACAAACATTTACACAATCAGCAGT    |
| 44 | cgd4_1100 | TTATGTTTGGGAGACTGATCCAC      | ATCTCTGCCCTGAACTCCAA         |
| 44 | cgd4_1110 | TCAGGGTGAGACTGGAGTAGGT       | GCCTTTTCATATTCTGCTGTTCC      |
| 44 | cgd4_1130 | AAGTAATGCTCATGCAAACATCTC     | GTGTTGATACATTTCCCATCATTC     |
| 45 | cgd4_180  | TCATCCAAACGCTCTAGTTAGGT      | TTTCTCAAACCTTTATTGTTGTCATT   |
| 45 | cgd4_1140 | CTGAAAGTGAACGCCATGATAC       | GATTCATCCGAACCCATACAA        |
| 45 | cgd4_1150 | TTTGAAGCTGGATTAAGAAACATAG    | CATATAATGAATCTCCGTATCGT      |
| 45 | cgd4_1160 | AGTGCCAATTCATTATTTACCATT     | AAAGACCAGACCCAACCAGTAA       |
| 45 | cgd4_1170 | TCTGATGATGTTGACTTGGAGG       | CTTCAGGTATTCCACCCTTCTTT      |
| 45 | cgd4_1210 | CGCCTCCAATTTACGATAAGAA       | TGGTACAACATAGCCTTCCACA       |
| 45 | cgd4_1220 | AATGAAACTGAAATAAATAAATCTGGG  | TTCTGTTTACTTGGGAGACTT        |
| 45 | cgd4_1240 | AACAATGCTTTAACAGACGATCAA     | TCTAAGTAATTCGGCACCACCT       |
| 45 | cgd4_1270 | CAAATGGATTGGCTTGGACT         | TGGTTTGTCTGTTGACCATCT        |
| 45 | cgd4_1280 | AGTTTGTCAATTCATTGCACTTT      | ATGTGAAGGTTTGTATCATTGGA      |

|              |                             |                             |
|--------------|-----------------------------|-----------------------------|
| 45 cgd4_1300 | GGAGTAGTAGCTGGAGCGGTAG      | CTTGAACGCCATCAGTAACATC      |
| 45 cgd4_1310 | TGGTTCTACTGCTGGGCTAGTT      | TGGTTGTTCTTGCTTCACATTC      |
| 46 cgd2_1040 | AACTGGTCGAAGATTGTGCTTT      | ACCTTCCTGATCCTTCATTAACC     |
| 46 cgd2_1080 | CCAGAGCTTGACATTTCTGATTT     | CATATTTGCCACTCACAGCATT      |
| 46 cgd2_1090 | CAAGCCATTAAGAAAGAAGGGA      | AGATGAGAGTGGGACTTGAAA       |
| 46 cgd2_1120 | GTAGTTTCTGGAGCCGCACT        | CAGGAGTACCATCAACCTTTCC      |
| 46 cgd2_1130 | CCAGCAAGGCAGTTTACTATCA      | TATTCGCTTGAATTTGACC         |
| 46 cgd2_1230 | AAACAATGCAGAGGAGCAAGA       | TCACAACATAATTCAAATGCACC     |
| 46 cgd2_1240 | TTTGGGAAGAGGCTGAGAAAG       | AGGCAATCAGAAATATGCGAAG      |
| 46 cgd2_1260 | AATTCTTTCATCCAAGCACCAG      | TGTCAACCATGTATCAACGTCC      |
| 46 cgd2_1460 | TATAATGGGCAGGTTTCATCCA      | GGCTTGTCTGGGACTGATCTAA      |
| 47 cgd2_1570 | GAAGTTGGTGTAGAAGGGTGCT      | CAGATCCGCAAGTTTCAAGTC       |
| 47 cgd2_1580 | TGTCCAAATCGTTCTTGATTT       | CTTATGGATCTGAAAGGATGGG      |
| 47 cgd2_1720 | CTACATGAATTGGTTTGGTTGCTT    | AATTGAGCGATTACCTAGTGCC      |
| 47 cgd2_1770 | GGAGTAAGGTTAAAGGATTGCGT     | ACATCATCGCCAAATACAGACA      |
| 47 cgd2_1930 | TTCCTCCTAACCATTCTTCTCC      | CAGGTTCACTACCAACTTCCCT      |
| 47 cgd2_2010 | GTCATGCCTATGCTCAACCAC       | AGACCCAATACTGCAACGGA        |
| 47 cgd2_2050 | TTGGTCTCCACAAGGAAGAGTT      | AAACTGCTACGCCAATATGGTT      |
| 47 cgd2_2070 | AGAACAAGGCCGCTAATAACA       | CAAAGAGGATTGGTAAGGGACA      |
| 48 cgd2_2110 | CTTTATGGGATGCGTTACATT       | AGTTGGAGCTGAACCACTTGA       |
| 48 cgd2_2240 | ATTTCTAATGCAAACAGCTCGG      | AGGCCACTAAATGATGATGGAA      |
| 48 cgd2_2550 | ATCATCAACCATTTACAGCAAGA     | TCTCTCATTTACAATCCAGGCA      |
| 48 cgd2_2910 | ATTGGGATGTGAAGCAAGAAGT      | AGCAAATGAATCCAACCTGAACC     |
| 48 cgd2_2920 | AGACAACAGCTATGTTACCGCA      | AAAGGAAGCCATTACAGTCCAA      |
| 48 cgd2_3100 | ACATTCAGTTTGGCTGGAGTTT      | GAGGCTAATGGACTTTCCGTC       |
| 48 cgd2_3110 | TATCGCCAAAGTCTGCTATTT       | TCACTCAAACGGTGTCTATCTG      |
| 48 cgd2_3270 | GTGGTATTGATGAGGACTTTGGA     | ACTTCGACGGTAAATTGATTGG      |
| 48 cgd2_3290 | CTCAAAGTACCCGTTTCTGAC       | TCACATTTATCGCATTCCAAAC      |
| 48 cgd2_3300 | GAATCTTTGGTGGAAATCTTGA      | TGTGCATCTTTAACCTGTTCAATT    |
| 48 cgd2_3310 | CAATTACAAGGGTTGGTAGGATG     | CACTATCTCCTGTCCCCTGAA       |
| 49 cgd2_3320 | AGAACGCAGGATTGTGTAGATG      | TCCCTCTTGTTGCTTAATTTCC      |
| 49 cgd2_3350 | ATGAAGTTGTTGCCGATGTTT       | GATTTGAGTAGCAGTTGGAGCA      |
| 49 cgd2_3380 | TATGCCACGTTTCAAGTCCATAC     | TTACACCTTCCATAGTCCCACC      |
| 49 cgd2_3420 | TCGATTCTGGAGCTGGTAAAGT      | CGGTTATGGGTGTCATTTCTTC      |
| 49 cgd2_3490 | TCAATGGACAAATGGTATGGAA      | TCCGCCTACAACAATAATCCT       |
| 49 cgd2_3700 | AATTCACCTCCTCCTGACTTGA      | ATCCTCCCATTCTGACTACGA       |
| 49 cgd2_3710 | CCACCAGCTTTAGAATCAGCA       | ATCTATTCCACATCGCATATAACTTTC |
| 49 cgd2_3730 | TCAGCGATACTGCAAAGAATGT      | TAGCAATGGAAGAAAGCTGGA       |
| 49 cgd2_3920 | GAGGCGGATACGATCTGAATAG      | GAATTGCTGCTGAGATTTGTTG      |
| 49 cgd2_4020 | TTATGGACTTTCTACATGCTCCC     | TTCATATAATTCTTCTGAGGCTTTCTT |
| 49 cgd2_4040 | TGGCACACCTTTACCAATTTT       | TTTGGGATGATTCTTGATTGATTT    |
| 49 cgd2_4080 | GGGTAGTTTACAGCTATTGCACC     | ACCTTCATTTGATGCTTGGTCT      |
| 50 cgd2_4210 | AAACTTAGGGTTGTGGAAGGATT     | TCAAGTAAAGTCAATTCGATGGTT    |
| 50 cgd2_4370 | GTCATCCTCTTCTTCACGCC        | TTTCTAGTTCAGCTTCAACAGCC     |
| 50 cgd3_120  | GACAACGATTTGAACAAGAGAACT    | ATTATTGCCATTCACCTTTCCA      |
| 50 cgd3_130  | ATTGCAGATATAGAGGCCGAAA      | CATCAAACCCTTCACCTTTACC      |
| 50 cgd3_170  | AAAGAACTTGGAAACATGGAATAAAGT | GTTGCGATATGGTTTGCTGTT       |
| 50 cgd3_200  | AGTGGAGGAAGCAATACGAAAG      | GTTCAAGCTCTCCCGTAGGTAA      |
| 50 cgd3_230  | ACCAATCTTGCTTGAGACTTCC      | TTCTCCTTTAACATCCGAAACC      |
| 50 cgd3_320  | AAATGCAATCAAACACACAAA       | TTACAATCAAACCAAGAGAATCCA    |
| 50 cgd3_490  | GAAGCTGGAAGGAATCTGAAA       | GCACATGAAACAAGACAGGAA       |
| 50 cgd3_540  | AGCTATTCTATCAGCAGCATTTCA    | CAACAGAACCCTCCACCATT        |
| 50 cgd3_820  | CAATCAAGGTTCAAGCAATTCA      | GATAATACCAGCCTTCGCTCC       |
| 50 cgd3_830  | AAAGGGAATTGCTCGTATCTTG      | CGGTCATCTTCTTAGCTTGTGTT     |
| 51 cgd3_840  | ACTGATGCTGAGTTGGAATCTTT     | GTTGGACTTGCTTCTTATCCCA      |
| 51 cgd3_870  | CATTATAGTTTGTCCCGCAATGA     | TTTCAATTTCTTGCAATCCACC      |
| 51 cgd3_910  | TCTGGATGTCAATGGCTAGGT       | CCAATCTCCATATCCTATAATTTGTCT |
| 51 cgd3_920  | AGCCATCTCAACCACAAATACC      | CCGCTACCACTCTGAACAAAC       |
| 51 cgd3_990  | CAGAAAGATTTACCTGAATGGTTAGA  | AATGAGATGATTGCGACTCTTG      |

|    |           |                             |                           |
|----|-----------|-----------------------------|---------------------------|
| 51 | cgd3_1040 | TGATAAACTCGCCTCGTTATTATTT   | AGAAATCTTTGCTCATTGGTTG    |
| 51 | cgd3_1050 | ATGCAGGGACTAACTTTGGAGA      | TAATCCGAACGCATCTTTCTTT    |
| 51 | cgd3_1110 | ATGTAGCAATGAGTGAGCCAGA      | TCCTAAACTACCAATCCCTCCA    |
| 51 | cgd3_1450 | CGTGGAAATTGACGTTGTTAGAG     | CTGAGAGCTTGTTGTGCTGAGT    |
| 51 | cgd3_1460 | ATTTCTCCAGTATCGTTGCC        | ATTGCCTGGGTGTTGTTACTCT    |
| 51 | cgd3_1470 | CTGAGAGGATGGCAGTTGTTG       | ATAGGCTCTGGCGTCTTTCTTT    |
| 51 | cgd3_1480 | AAGGAACATCAGCAAAGATTCA      | ACCCTCCATGTCCATCAATTAC    |
| 52 | cgd3_1500 | AATTGGCTCAAAGGTAGGGTTT      | GCTACTGCTCGATTCTTGTTGTT   |
| 52 | cgd3_1550 | GATAATAAATTGGCAGAGGAATATGAA | ATTTGAAGATCCCGCATGAA      |
| 52 | cgd3_1580 | TTTGGATTGACATGAATGAACC      | GTTGTGGACTTGTCTGTGCTCT    |
| 52 | cgd3_1600 | ACCGAAATGCAAATTCACAAG       | GTGATGATGTTGTTGTTGGAGG    |
| 52 | cgd3_1610 | GATTACGAATGTATGCTCGACTTG    | CCAGATTTGTGTTCCCTTCTTCC   |
| 52 | cgd3_1620 | CTCTTAGCCTTTCCTGCCATAA      | TGATGAGAATATAGCCTTGCTCC   |
| 52 | cgd3_1630 | AAGCGCAGGCTCACTAACTAAA      | AAGTAATTGTTGATTGTCTTATCGG |
| 52 | cgd3_1640 | TTTATCACCTTCCACAACCACTT     | CAACGCTCATTTCGTCTATTTG    |
| 52 | cgd3_1670 | ACCATATAAACTTGCCTCTTCCA     | CGCCATGTATGCTTTACCAG      |
| 52 | cgd3_1700 | AGCACTGAAAGCACCTTAAACA      | CATCGTAGAGTTGCCTGAAGA     |
| 52 | cgd3_1760 | AGCGAGCATCCTTCTCCTTT        | GGAGGGCTTTAACTTGCTGTTT    |
| 52 | cgd3_1770 | CCAGAGAATGAGGGAAGTTAGTG     | TAGTGAATTGGAATGAGCAAG     |
| 53 | cgd3_1820 | TGTTGTCTGGTACGGAGAAATG      | CAAGAAGGAACCTAGCCTGAGA    |
| 53 | cgd3_1990 | AAGTCAGGTGGGTCTGATGTTT      | ATGATCCTTGGCTATTCTGCTC    |
| 53 | cgd3_2020 | TCCCAGATGTCAGAATAATCCC      | GACGGACAATATCAACGCATAA    |
| 53 | cgd3_2080 | TATTAGGCTTTGTTTGCAGGGT      | TCTCTGTGAATTGGACTTGGTG    |
| 53 | cgd3_2110 | GCGGAGATTTCTATGGGTACAG      | TGTATGTAAGTTTGGAGCGATT    |
| 53 | cgd3_2150 | TGGATCGTATTCTATTTGTCTCCA    | CGCTATATCTGAGCCACTTTAGG   |
| 53 | cgd3_2180 | AGAGGCTATTGGTGTGCTGTT       | GGGAGAGAAGCCAAATGTAATG    |
| 53 | cgd3_2190 | AAAGCGTTTGTTGATAGTGGTG      | TGTTATTGAGAATGGAAAGAAGGA  |
| 53 | cgd3_2220 | AATCTCGCAAATGATCCGTC        | GGGTTCCATAGGGTAATGCTC     |
| 53 | cgd3_2230 | GTGACATTGGCTGTGATAATGAA     | ATAGCTTCACCTTCGCCATAAA    |
| 53 | cgd3_2240 | GGGTTCAATCGGACATTAGAAA      | GCTTATTTGATCTTGTCTATCCA   |
| 53 | cgd3_2410 | TCTTTCTCAGCCAATTCAAACA      | CCAAACCTGATGATACCTTCGT    |
| 54 | cgd3_2390 | TTTAACTGCAATATGGTTCAGGG     | ACGCCTTCTCCACTGCTTACT     |
| 54 | cgd3_2490 | TTTCAAGTGGCTACACACCATC      | ATGCGAATAAGAGACCACCCT     |
| 54 | cgd3_2500 | TTAGCGGCAAGACTAAGAAACAC     | TGTAATCATCCAATCGTTCAGG    |
| 54 | cgd3_2510 | CACATTTAGACCCGCAATTTCT      | CGCATAATCTTCGTCTATCTCA    |
| 54 | cgd3_2530 | ACTGCTCCCTGCCTATCTGAC       | ATCTGCACCAAGAACAACACAA    |
| 54 | cgd3_2550 | AACAATAAGTGGTGGGCAAAGT      | TGCATAGCATCAAGAACCCTAA    |
| 54 | cgd3_2580 | TTATATCAATCATCGGCTCCTTT     | TTCTTGTAGAGTCATCGCTTGG    |
| 54 | cgd3_2590 | CAAGACGCAGACGAGTCAA         | CCTTCATTCTTTCTCCTGCAAC    |
| 54 | cgd3_2600 | GCTTTCTTTGCTATTCCGTTTG      | TGCCATGATTATTGGTGGAAC     |
| 54 | cgd3_2610 | TCAGGAAATGAAATTGAGGAAGA     | TGCGTTTCTGTATGAAATGTGAA   |
| 54 | cgd3_2620 | GGAGCGAAGATGATTTGACTTT      | TTTGATTGGCCTGTTACTCCTT    |
| 54 | cgd3_2630 | GCGAATTGCATTAAGTTCCA        | AGAAACCTCCTTTCCATCACAA    |
| 55 | cgd3_2640 | GATTATTGAAACATTTGATCTCCCA   | TTAATATCTGACTCGTAACCACCAA |
| 55 | cgd3_2740 | CATATTCTGGAGAGAGCGATGA      | ATCATTCTGTTGCCTTACCTTCT   |
| 55 | cgd3_2750 | ATCAAAGAGGCGGAGATTATTG      | AGGTTTCTGATTTCCAAGGTCTAA  |
| 55 | cgd3_2870 | GCGACAATCATCCTTGGTATCT      | TGGATCTTTATTGATGTGGGCT    |
| 55 | cgd3_2920 | ATATAAACTCTGATGTCGGGTGG     | TTAAATTGCCAGAAACCTCTT     |
| 55 | cgd3_2950 | AGAAGCGTACCATTTACCAAG       | CTCCTTATTCCTATGCCCGATT    |
| 55 | cgd3_2960 | ATCGCGTTAATAGATGCACAAA      | ATGCAGGATCAATCGTCTAGGT    |
| 55 | cgd3_2970 | AAGTATGGAAGCCCTTTGACTG      | TCACAAATAACACTTGGCTGCT    |
| 55 | cgd3_3050 | AGCAACATAGGAGTAAGCCCAA      | GAGCCCGAACAAATAGGTGTAA    |
| 55 | cgd4_800  | CAATGTCAACTCCATTTCTCA       | GAATTATCTTGGCCTGATGTCC    |
| 55 | cgd4_870  | GATCGTGGTCTTTAGATTATGGAG    | TAAGGCAAGTTCTTTGGAAACC    |
| 55 | cgd4_970  | TCCAAGCATTGAGATCAGGTTT      | AACTTCATAGGCTCCACCTCCT    |
| 56 | cgd3_3060 | TTGGCTTCATTTCACTCAACAG      | TCAATAGAAACAAGGGCGATG     |
| 56 | cgd3_3070 | AGACAATGAGGAAGCATGTGAG      | GTTCTCCAGAGGGAGTGAATGT    |
| 56 | cgd3_3090 | TGGTGCAAGATTTGTTTTATTG      | TTCTGGTTAAGAATGACTGCC     |
| 56 | cgd3_3120 | GCCTCCGTCTACTATGGCTTAC      | TCTTATATCTGCGAGGTTGTGATT  |

|              |                             |                             |
|--------------|-----------------------------|-----------------------------|
| 56 cgd3_3150 | ATCTGAAATTGGTCTTGTTGGG      | CCGATTGTTGGTTCCTGATACT      |
| 56 cgd3_3160 | ACTCCTGAAGAAGCACAGAAGG      | TGGTTAGTTGAGATGCAGATGG      |
| 56 cgd3_3170 | TCACTCAGGTGGAACAAATTCA      | TGCTTGTCATCATATCTGCCTC      |
| 56 cgd3_3180 | ACTCGTCTTCTGCCAATTCAGT      | AATGCCTTTTCGTTATTTGTGCT     |
| 56 cgd3_3190 | CTGGATTGGGCTTTCTTCATAG      | ATGTTCTGGCTCTCTATCATTGG     |
| 56 cgd3_3230 | AATTTGTAAAGTGGGCTGCATAA     | TTATCGAACCTTCCTCCTTTGA      |
| 56 cgd3_3290 | GGAAGAAGAGCAAATGGAGAAC      | TTTGGGAACCTGAATAACGACAA     |
| 56 cgd3_3310 | CATGACGAGAGGTCCAATCTTT      | AATAAGTCAGCAAATCCCATTCC     |
| 57 cgd3_3450 | TCAAGCGTTCAGGTTATTGAAG      | CCAACAAATTCCTGCTTATTCC      |
| 57 cgd3_3460 | GCTGCTCCTTCATACTCTGGTT      | GATAGGGATGTCCTTGCATGTT      |
| 57 cgd3_3490 | TCGCATTAACACAAGTTCTCAA      | GGGTCCATAGAATAACGATCCA      |
| 57 cgd3_3500 | AGTTGGTGCAGCTTTGGAGT        | AAGTGCTGAATTGATTGCCTTT      |
| 57 cgd3_3520 | TATGGCGCATGTGTATTTCTTC      | ACGACAACCAGTGCTGATATTG      |
| 57 cgd3_3550 | GAGCTGTATTATCGCAAGGGAC      | GAGGGAAGAATGGAGGGTAGTT      |
| 57 cgd3_3620 | CCGTTTAGATAGATTGATTCCTGTT   | TTAATTCGTTTCCTGCATCATC      |
| 57 cgd3_3690 | CAACTCCAGGTAGAATGCAGG       | CTTTGAATCTCTGGCGGTATCT      |
| 57 cgd3_3830 | ACACTGGCGATTACCATTCACT      | AAACCTCCTCAAACAAATCAAGAA    |
| 57 cgd3_3870 | TTGGAGGACTTCAGAGTGTGG       | ACCTCATCTGGTCTCTTCATCC      |
| 57 cgd3_3940 | GTAACATGGATGCAAAGCTCA       | CACTTCTTGATTTGTAGATGGTCCT   |
| 57 cgd3_4030 | TGTGCAAACAACACAAAGCA        | CGAAGACTGCTAGAATAAACCTCAA   |
| 58 cgd3_4040 | CCCGAGAAAGAATTGAAAGACA      | GCTGACGGTTAATTTGAGCATT      |
| 58 cgd3_4080 | CAAATGAGTTCTCCTCCATGATT     | ACTTTGAGTTGTCTGCCTGTTCT     |
| 58 cgd3_4120 | ATGAATAGGCAAGGTGCAAAGT      | ACAAATCTACCATCTTCTGTTGTCTCT |
| 58 cgd3_4130 | TTAAACTGCTTTGGTCTTTCCAG     | GTAACAGAACCATTTGTATCGCC     |
| 58 cgd3_4140 | CGCTGGGAAACTTAGGATTATG      | TCCGTACTIONTCTGTTGGTG       |
| 58 cgd3_4150 | ATTGTGGCAACCTTCCATATTC      | TGACTTGGCTCCTTCTTCTTGT      |
| 58 cgd3_4190 | CGCTTCTCTTTATCAGTTGTTG      | AAGAACCTTGGAATGGATTGA       |
| 58 cgd3_4210 | TGGAAGAGTGCAAGAAAGTCAA      | TAGCCAACGTGGAATTAACAGA      |
| 58 cgd3_4230 | CTAATGTGATTGAGGTCTGGCTT     | CCTTTAATAGATATAGGCTCATTGCTG |
| 58 cgd3_4240 | ATTGTTGATTCCTCCGTTGTTT      | ATGGGCTACGAAATGTAGGGT       |
| 58 cgd3_4260 | ACATTAACACGAATGCAAGCC       | TCTTCAATATCAGGCCGTTCC       |
| 58 cgd4_400  | GGCATTATTAGCACTTAACTTGA     | CTTCTTCAAATCGTCCCAACA       |
| 59 cgd4_350  | GGAAAGTTCATGGTGTAGTTTCA     | GATCAATTACAACAGGCCAACA      |
| 59 cgd4_380  | GTCCACTTTATTGCCTCATGGT      | ATCCAAAGAAACATCGTCCAAA      |
| 59 cgd4_430  | TGTAAGGCCAGTCGAACAAA        | TAATTCGCTCTCAAACAAACCA      |
| 59 cgd4_1320 | CGGATAAATCTGGTCTTCTTCC      | AACTTCCATCCATTCAACTCC       |
| 59 cgd4_1330 | ATATCCAACATCAATCGACCAA      | TCAGGTACTTCTCCTTGTCTGT      |
| 59 cgd4_1340 | AATGGTTCCAATACAAATCAATATCA  | ATGATGAGGAGGAGTGAGGAGA      |
| 59 cgd4_1350 | GCTTTGATATGGAACGGATCTT      | CTTGCTCTTCTCTTGTCTTTC       |
| 59 cgd4_1370 | TGGAGTTAATGGTAGGGATGGA      | ACGAATCCAAGGGAACATAACA      |
| 59 cgd4_1380 | TTGGATGCTTGGTTAAGATGA       | GACAATAAAGGAGCTAATCCCGT     |
| 59 cgd4_1390 | GGAAAGCAATACAAAGTGGAGG      | GCAGAGAATATCATCCAAGCAAC     |
| 59 cgd4_1400 | AACCTATCCAGGTCCAATTCT       | GAGGTCCAACCTCAATTTCAAC      |
| 59 cgd4_1420 | ATACGACCCAATGATACAAGCC      | GTAATCTTCTAGTCTGCTCCTG      |
| 60 cgd4_1430 | GCCAAGCCATACTCTTCTTACA      | CTGATCCCTCTTCTTTATTCTTCT    |
| 60 cgd4_1440 | TGAATCTGAACCTGAACCTGAA      | TGAAGCCTGACAACACTACTCAA     |
| 60 cgd4_1450 | AATAGGAATGGGAATGGGAGTT      | GTTTGAACCTGGATTTGAGCTTG     |
| 60 cgd4_1470 | CCGGATTTGGAGATATGATGTT      | CAGCTATTGATTGGAAATGGGT      |
| 60 cgd4_1480 | TTATGGATTTGTTAAGGGTGGAA     | GTAAGGACATGGATCATTAACTCA    |
| 60 cgd4_1500 | TGAAAGCTCGGAAGTTGGTAA       | TTGCATCCACAATATCCTCATC      |
| 60 cgd4_1580 | AAATGAATCCCATCAGGAAGAA      | TGCAACTTCGGTTGTATATTTGA     |
| 60 cgd4_1600 | TGAATACAATCAATAGCACGCC      | GCACCCAGTTGAGGAGTTAAG       |
| 60 cgd4_1610 | ATCAGGTGGTTATTTGATGGCT      | CTGTAAGGGAATCTTTGCTGGT      |
| 60 cgd4_1620 | TCATTCTTCCAAGTGAGGATACTTT   | TTCATTCTGTTTCCCAATCGT       |
| 60 cgd4_1680 | AGTGCCAGCAATGGAATCTAA       | AAATAGTGCAGGATTTGAAGGAA     |
| 60 cgd4_1690 | ATTTCAGGAGAGAGTGGAGCAG      | TCCCAAATACTTCTAACAACGGA     |
| 61 cgd4_1720 | GGTTGTATTTTCTCAAGCAGG       | TCAGTGTATCTGTATAATCGCCAAA   |
| 61 cgd4_1730 | AAAGGAAATATGGGCTGGATAAA     | CTGCAATAGAACGAGCAATCAA      |
| 61 cgd4_1770 | AACTTAGAACAGGAAATTGTAGACAGG | ATTGACCTTGGAAATCACGCT       |

|    |           |                           |                          |
|----|-----------|---------------------------|--------------------------|
| 61 | cgd4_1780 | ATGCCCGATATGCTATGAAAGT    | ATCCACCAATCTATGCTCACAA   |
| 61 | cgd4_1790 | TTAGCGTTGCTTGGTTAAAGGT    | CTGATGGACAAAGAATCCCAA    |
| 61 | cgd4_1800 | TCTGATTGGCTATTGAAGTATTGTG | CCCAGGCTCATTCTAAGTG      |
| 61 | cgd4_1840 | GGCCATAAGAAAGATGATGGAG    | AACAATGAAATAAGAGCCGGAA   |
| 61 | cgd4_1850 | CTGAACCTGAAGAAACATATTGGA  | TTTCATTATTTGCCACCACACT   |
| 61 | cgd4_1860 | GCACTTGAAAGCAGCAGAATAA    | AATTGGAGTGGCTGAAAGAAGT   |
| 61 | cgd4_1870 | GTTACGAGGGTATTCTGTTC      | TACTGAATCTTTGCTTGCATC    |
| 61 | cgd4_1880 | TTTGGGTTCTAGCAGAAGAGT     | TTTGCATTGTTGAGTTGTGATT   |
| 61 | cgd4_1890 | AGAAATATAATCCATTGCGTTCCA  | GACTGATTCTCCATTCCACA     |
| 62 | cgd4_1910 | TCAGCATCTCTTCTGCCTTTCT    | TGCCTTAATGATATTTGGAACGA  |
| 62 | cgd4_1920 | GCAAGGATTGCTCAGTTAAGG     | TCTCTCAAGGAGTTGTCTGGGT   |
| 62 | cgd4_1930 | GTTGTAACACTATTGCCACCTTG   | CCATTCTTGTCTCGCTATCATT   |
| 62 | cgd4_1950 | TGCAGATTGTATCAGAAGACGG    | TTGAGACGGCTAATGGGAAA     |
| 62 | cgd4_1960 | ATGACTGCGTGTATTGCTGTG     | GCTCGTTGTAGTAGATAGTGCTG  |
| 62 | cgd4_1970 | TATGGATTGGTATTGGTGTGG     | TAGTTGCATTGGGATCTTGAC    |
| 62 | cgd4_1980 | GGAATGGGATTTATTGTTGGTG    | TAATGGCAACCCTGGAAGATAC   |
| 62 | cgd4_2000 | TAAGGAAATTGTCAGGGAGTGG    | CTTCTCTGTTTGGCTACCTTCA   |
| 62 | cgd4_2010 | CAGTGTTCTTACTGGAGCAGA     | AATTCTTACGACATCAACATTCCA |
| 62 | cgd4_2030 | CGGTTGCATTAAGAGAAATTAGAAA | CTCTGCATTCCATCTCCACA     |
| 62 | cgd4_2070 | AAATAGAGTTGGAACGAAGATCAA  | CGCAATGAATAGTGCAGAAACT   |
| 62 | cgd4_2080 | CCAGGAATTTGTTGTTGCTGT     | TGGACTCTCCTTGTCTCGTATT   |
| 63 | cgd4_2090 | CAGGTACAAAGTTGAGGCCAGT    | ATCCGAGTCAGCATCTTGTCT    |
| 63 | cgd4_2100 | ATGACTTATAGGAAGGGCGTTG    | CTTGTGTGTGAGGAACAGAACC   |
| 63 | cgd4_2120 | CCGTCCTCTCTTCGATATTGTT    | TCAAGTGCTCGCTTAGTTGTTT   |
| 63 | cgd4_2130 | TAAAGAAGAGGAGAGGGCAGG     | TCATTTGTGATTGATTTGCTT    |
| 63 | cgd4_2140 | AAACAACCTCCGGTTGAAGAA     | GTCTTGCTCTGAAGGGATGAAC   |
| 63 | cgd4_2150 | CGATTTGCCCCACACTACT       | CATGGCGCTTATCTCCTTTATC   |
| 63 | cgd4_2160 | CATCCGTTGAGAGCTGTGATT     | GTTGACCAAGAGAATCGGACA    |
| 63 | cgd4_2170 | AATAATAAGAATGAATGGGTGGAAA | GCATGAAAGAGTTAATGGTGTGA  |
| 63 | cgd4_2180 | TCAGACAGGACTTATCCCAGAAA   | TGCTAATCTTAATGTTGCGCTG   |
| 63 | cgd4_2200 | GTAGGAACCTCCAGTGAGTTGG    | CAGTCTCCCTCCTGCTATCATC   |
| 63 | cgd4_2210 | TGCACAGATAATTGCAGAAGGT    | CGCCTATAACCCAAATTCCTAA   |
| 63 | cgd4_2220 | TTGGCCCCGATTGAAACTAAC     | TCAGGCTTAACTAATGCGATTCT  |
| 64 | cgd4_2230 | AATGTTCCAAATCTACTACCGCA   | GAAATGATCGCATATTCTCTTGG  |
| 64 | cgd4_2240 | GTAACATGACCATTTGTGGGAA    | TCAGTTTGTGCTGCTTGAATG    |
| 64 | cgd4_2250 | CAAATTACCTCTTTGCTTTCTTGT  | TTACGTGATCTCTTCGATCCTG   |
| 64 | cgd4_2280 | TCTTCAATGCCAAGAAATCCTC    | TTTGTCTCCTCTGTTCTTCTATCT |
| 64 | cgd4_2290 | AATGGGTCAAGCTACATTTGATTT  | GTATGGAGGTGAAACAGTAATCCC |
| 64 | cgd4_2310 | CTAATTGGCTTTGGAACAAGGA    | GTGCCCTAGAGAAATGGATGAG   |
| 64 | cgd4_2320 | TAGATTCACAGAAAGAACTTCCAAC | ATTCCGCAAATTCATCACATC    |
| 64 | cgd4_2330 | TCAATAGTTTCTATGCTGCGA     | CGCATCGTTTCTTTCAGGTT     |
| 64 | cgd4_2340 | GGCATTACTTATCTTGCTCTCCTT  | TCCTCATTGCTGAACTTTACTCC  |
| 64 | cgd4_2360 | GATGGTATGAAGGTTGAAAGTGG   | TATTGTTGTTGGTTGTCTGGCT   |
| 64 | cgd4_2380 | ATGGAAGAGATACTGGGTGGAA    | AACCGTACTTATGGCTGGAAGA   |
| 64 | cgd4_2390 | AAGGAGTTCAGCATCCAATGAG    | CCCACGTATCCATTACTGTTCC   |
| 65 | cgd4_2410 | CACTGCAACTAAACAAAGAGGTTTC | TGCTTGGCTTGAATCTGAGG     |
| 65 | cgd4_2420 | GCCTCAATACTTCTAGGTGCAGG   | TCGCAGCAATATGAAGAGGAGT   |
| 65 | cgd4_2430 | GTTAAATGATGGAATTGCCGAA    | AGTATTGTTGTGAGGGCCAAGA   |
| 65 | cgd4_2470 | AACAACCTTGGTATGCTCCATT    | GGCCGCAATTACTCTTACAAC    |
| 65 | cgd4_2480 | TTACTCTTTCTGCTAATCACTCGG  | ATGCTGTGTGAGGAATTGTGTT   |
| 65 | cgd4_2490 | ATGCAATCACAGGTTGTTGAGT    | GTGGGTCTTTCATATCTGCCTT   |
| 65 | cgd4_2500 | TAACCCACTGTTGAGGGTCTTT    | CTCTTGATTGATGCATCTGT     |
| 65 | cgd4_2510 | GCAAGTCTGTGTCAAATGCTC     | TATTAATCCTCCAAGCTCGTT    |
| 65 | cgd4_2520 | AGAAGCGATCAGGCAAAGAA      | GATCCGAGTGCCAAATTATACC   |
| 65 | cgd4_2550 | TTTATTTGTTAGGGTGGGTGGT    | TCCGAATACACTAGAAAGCTCAA  |
| 65 | cgd4_2560 | GCAGCTTCAATCCTGTTTCA      | ATGAGCTTCCATTGTTTCTGT    |
| 65 | cgd4_2570 | AAATATCTGCTGGCTTCCAAA     | ACCACCTGCATAAACAATACCAC  |
| 66 | cgd4_2580 | CTATCCCTTCAACTCGCAAGAC    | CTCTCTGATCTGGCCTGTACCT   |
| 66 | cgd4_2600 | AGAGCCGAATAACCTACTTCCA    | TCTCTACTCCTGTTCCATCCC    |

|              |                            |                             |
|--------------|----------------------------|-----------------------------|
| 66 cgd4_2610 | AAGCCGACCCAACACTATCA       | TCCAATTTCTCCACATCGTCT       |
| 66 cgd4_2620 | TTATGCTGTTGATGAGGCTTCTG    | GGATCTAACTTGCGAATAGACTTCTTG |
| 66 cgd4_2630 | TGATGCAAGTATGTCTAAGCGG     | GGCTCTGATGGATTGATTGATT      |
| 66 cgd4_2640 | AAATAGGAAGGAACGCCATAA      | CTTCTGCCATAGAAAGCATCGT      |
| 66 cgd4_2650 | ACGCTAATTGATCCTTCTGTTATTG  | GAGAAATTGTTGGGAAGTTTGG      |
| 66 cgd4_2660 | GACCCATCTAATGCTGAAGAAAGT   | AAGAGGAGTACCACCAAAGCAA      |
| 66 cgd4_2670 | ATTGTAATGGGTGAATGGAAGG     | GCATTGGCGGATATTTAGGTAG      |
| 66 cgd4_2690 | TTAGCTCAAGTCCCAGTCCAA      | TAGTACCTCACGCAAAGACGAA      |
| 66 cgd4_2700 | TGACGAGAAATATCAGTGTCCC     | TTCGTTGGAAATAAGCTCTCCT      |
| 66 cgd4_2710 | TATCTGTAATCAGGGCAGCTCA     | TTCATAAATCCATCTACGCCTGT     |
| 67 cgd4_2720 | AGCGAAGGAGCGATAGTTGTAG     | CTTCAGTAGCAGGATTGTTCCC      |
| 67 cgd4_2740 | AACATAGAGGAGAGCCTGATGG     | GACATGGTTGATGGTTTGATTG      |
| 67 cgd4_2750 | TGGATTTCTCTAGGGTCTCACAA    | CTGCCAAACTCATTACTGCATC      |
| 67 cgd4_2760 | GCAATGTGCAGTCTTTCTTTCA     | TGCATTTCCACTTAATACCCTCA     |
| 67 cgd4_2770 | GCATCAAATATGGCAATGAAG      | ACAGGCTCAGTTACAGTTGTGG      |
| 67 cgd4_2780 | AATTACCCTTGCTGATGCTTTG     | TTGGCATTCCCTTATTCTTGAC      |
| 67 cgd4_2790 | CCCAGAATGTATCTCTCCTAACTTG  | AATTGCGTTATCTAGCATTGGAC     |
| 67 cgd4_2810 | TACTTGGTGTAGGTGGTTGGA      | TTTGGAGGAGTGTAAAGAACTG      |
| 67 cgd4_2820 | GATGCAATAAACACGGAATTTG     | CTTCTGTTCCGGTAGGCTCTTCT     |
| 67 cgd4_2830 | ATTCGCAACGGAGCAGATAA       | CAGCAAATGTACGAAGGCATACT     |
| 67 cgd4_2840 | AATACGGGCTTTCACCTAATGGT    | CCGACCACAAATGTTACTGAACT     |
| 67 cgd4_2850 | GGAAGTATATTGCAGAACTTGGG    | GGCTTTGCGTGGTGTATTATC       |
| 68 cgd4_2860 | ACAGAGGTGATGTTGTTCCAAA     | TTAATTCCACATTTGAAGCCTG      |
| 68 cgd4_2870 | CCGTGGCTATCAAATTACCAA      | CTTCCACAAACACAGAAGCAA       |
| 68 cgd4_2880 | AAATAAGAATAATAATGGCTGGGTTG | GTCCTGACCTTAGCTGCCTTC       |
| 68 cgd4_2890 | TAAGCTGCAATGAAAGTGAAATG    | TTGGTTAATGTTTGTGCGTTC       |
| 68 cgd4_2920 | CAAACCGACCTAATAAGCGAAA     | TGCATCTTTGTTCAAGCTCATC      |
| 68 cgd4_2930 | AGGATATTCAAATTCGGCCAC      | GGCAAAGCCCTTCTATTTCTTT      |
| 68 cgd4_2940 | ATGCCAGACAAAGACAAGGAA      | CGCATTGTTTATATTGCTCAA       |
| 68 cgd4_2960 | ATCCTCAGACTCAACCAAATCC     | CCAAATGAGATCCCTAAATGGT      |
| 68 cgd4_2980 | ACGATGTTTCAATCCATTCCAC     | TTCTCTTCTTCAGCCTCTTCA       |
| 68 cgd4_3010 | AAATCAAACGGAAATACAGTCAAA   | TAATGTGCCCAGTGCTAACTTC      |
| 68 cgd4_3030 | ACTTGTCTCGCTCAGAACTCC      | GTGATCTAGGTGGCGTACCATT      |
| 68 cgd4_3040 | TTTATCTCTTCCGCACATAAGG     | TACATGCTTACCCAAATCCAAC      |
| 69 cgd4_3050 | AACGCAATTAGAAGAGGCGTAA     | GGCATAAATAACGCAGAACCA       |
| 69 cgd4_3070 | TGACAAGGAGAACAACAAGGTC     | TAAGTGGTTTGCTTTGGCTTTAC     |
| 69 cgd4_3090 | GCTGATTATAGATGCCACCA       | GAACCATCCTCCCATGTTTATC      |
| 69 cgd4_3100 | CGGTAAGCATGTAAGTGTGGAA     | ACATCTATAAACTGGAGGCGGA      |
| 69 cgd4_3110 | GCGGATTACTTTCAATGCTTCT     | AAACCATAACCATAACCGATCCTG    |
| 69 cgd4_3120 | ATGTTTGGAGACTTTGAGGCAC     | TGTGATATGCAGTTAATGGTGGAA    |
| 69 cgd4_3150 | GTTTGGAAATGAGCGAGAAGAG     | GGGTGCAAGACTCCCATAGTAA      |
| 69 cgd4_3160 | CATCGTTTGATGTGTCTCGTCT     | AAATTGGTTGCTTGGTTTGATT      |
| 69 cgd4_3180 | CAACAAGAGAACTTTGCGTTCA     | ATTGCATAACCATATCAAGCCC      |
| 69 cgd4_3200 | TCCACATCCATCTATTTCCACA     | AGCTCCTACCTTGCTACTTTGCT     |
| 69 cgd4_3210 | CCAATATCAACCACTGTCCAAA     | GTTGTGTGTTCCCTTGAATGAG      |
| 69 cgd4_3220 | AAATCAACTGGTGGTAAGGCAC     | GCAATTTACGAACCAATCTTT       |
| 70 cgd4_3230 | ATATGGTCCTGAGTGGAGCAGT     | TGATGAAGTTGTTCTCTGGCTTT     |
| 70 cgd4_3240 | TAATCAATCGACCCAACCTCAA     | TCAACAGGAATTGCATTGTCTAA     |
| 70 cgd4_3250 | AGTTCTCTTCTTGGAGGTGGG      | CATGCAAGTCCATCTTCTTAC       |
| 70 cgd4_3280 | ATCGCTATCTCAAATTCGTGT      | TACTACTGCTGCTCACTCCACC      |
| 70 cgd4_3290 | CCAATTCCAGTAAGAAAGCGAG     | TTCCAAATTCAACATCAACAGG      |
| 70 cgd4_3300 | GATCGAGGTTGAGAGAGTGGAG     | CTTCTACTGGCTTTGGGACTTG      |
| 70 cgd4_3310 | TCGATACCAGACCATCATCAA      | GCGGAGTAGTCGTAATCCAAA       |
| 70 cgd4_3320 | TCTTGAACAGGAGTTGAAGCA      | TTCTATGCCAAGGAGCGTATTT      |
| 70 cgd4_3330 | TGCAAGAGAAATCACACCACTC     | CTGCACTCCAAACATCACATTC      |
| 70 cgd4_3350 | GCAGCACATAAAGGTGAGTTTG     | TGAACAGATCCATAACTGGGAA      |
| 70 cgd4_3360 | GAACATTATTGGCTTCCAGGTC     | GAAACTGGGTTCTGTTGTCTCC      |
| 70 cgd4_3370 | TTAATCTTGACTTCCAACCTCCA    | TGAAACCAAATCCATCATCAAC      |
| 71 cgd4_3380 | CAAGGATGTTCCGAGAAATGA      | ATAGTCCCAGCCATTACA          |

|    |           |                             |                             |
|----|-----------|-----------------------------|-----------------------------|
| 71 | cgd4_3390 | TGACAAACTCAGAACATGGCTT      | AATACCTCCTTGTGAAACTGCC      |
| 71 | cgd4_3400 | CAGAAATGGACTATGATGCCAA      | CCAGTATGTAACCACCCATCCT      |
| 71 | cgd4_3410 | TGGAGCGGGTTACTTTACTGTT      | ATCACGGACACATTCACTCACTC     |
| 71 | cgd4_3420 | ATGACTAAAGGAAGCCGAATCA      | CATGCTCAGTGTTAATGGTCGT      |
| 71 | cgd4_3430 | TGTCTGGTCAAGGAGAAAAGTGA     | TCAGAAAGTTCGTCCAATCCTAA     |
| 71 | cgd4_3440 | CTTTACAGGACCAAGGATCTTCA     | TGCGACATCAATTCTTTAGGAG      |
| 71 | cgd4_3450 | CATGGAGACTGGAGTGATGAAG      | TGGGCACAAAGCTGTAGTAAGA      |
| 71 | cgd4_3460 | TGAACTGAATGCTTATTTCGACC     | AAATGGAAGCTGGAAGTTGAACC     |
| 71 | cgd4_3470 | TTGAACCAGAAAGTGGTATTGATG    | GGAGCCAAATCTTATTGTTGGA      |
| 71 | cgd4_3520 | ACTTCAGTTCAGCTTCTGCTC       | TGGAGGTGCCAGATAAGTCAA       |
| 71 | cgd4_3540 | TGCTCATTGTGGAGTTAAGCA       | GATCAGGGATTGGTTTGTGAG       |
| 72 | cgd4_3560 | AAGTTGTGGAAGGAGTCTATGTTTATC | CACTCAATACTTGTTGTTCTCTGCT   |
| 72 | cgd4_3580 | CTTCAGTTGTGCGATCAATTTTC     | ACACCAGTCTTATCCTCCTCCA      |
| 72 | cgd4_3590 | GGGAGATGAACGAAGATAACTCA     | TCACCAAAGGTCTCGCATACT       |
| 72 | cgd4_3600 | CCGACTACCCATTACAACATCA      | AACAGGAATAAGTTGGGCAAGA      |
| 72 | cgd4_3610 | TTCTTGCTATTATGGGATCGT       | TATTTGGCTCAAGTGTAGCGG       |
| 72 | cgd4_3650 | GGTACTGCTGGTTCAAGAGAAGA     | AACCTTCGATACGATTCTCTCAA     |
| 72 | cgd4_3680 | AAGTTTAGTATTAGCAGTTCAAGCAGG | AGTTGATCCCTTTCCAACACTC      |
| 72 | cgd4_3690 | AGTTGGGATAAATTGGAAGCTCA     | CTCTTGCTCATTCTCTCTCT        |
| 72 | cgd4_3700 | CAAATTCCTGTTCTGATTGGAGT     | TGTTGAATGGCTACCTGAAATG      |
| 72 | cgd4_3740 | CACAAAGAAGAGTGATTGGGAAA     | TTTCAATAAACATGCCGTCAA       |
| 72 | cgd4_3750 | CACACCCTATTTCTCCTCCTTG      | CATCCTGTAACCTCATGGTTTCC     |
| 72 | cgd4_3760 | GCATATAAGATTCAAGAACGACTGG   | AGGAAGGAACACAAACCTGAAA      |
| 73 | cgd4_3770 | ACAATATGAGCGCCAAGCTATT      | TCTGCATTCTCTCCATTACCA       |
| 73 | cgd4_3790 | AAATGACAAAGATAGCAATACAGTTGA | AGTTCAATCACTGCTCCCAGA       |
| 73 | cgd4_3810 | CACCCATCATCTGGTATAAGGAA     | TAGAGCTTGTTGACTTGGCAGA      |
| 73 | cgd4_3820 | CAAAGGTAGTTCAAGAGACGGAA     | GAAGTCAGAGTCAATGGATGAGAA    |
| 73 | cgd4_3830 | AAGCCGAGTTCATAAGACCAAA      | TTTCCGGGTATCGAAGAAAGT       |
| 73 | cgd4_3840 | TAACCCATCTTCTCCTCCTCA       | ATCGGGTCTGAGCTTAACAATC      |
| 73 | cgd4_3850 | TTGAGAGAGGTTGATGTTGCTC      | CCCTTTGCTATAATTGTTGGATG     |
| 73 | cgd4_3860 | GCAAAGACAAAGTCATCCACAA      | CATTTCAATAGCTCCTCCTCCA      |
| 73 | cgd4_3870 | TTAGTGGCTGTAGTGAATCCCA      | ACCTTCTCCACGTATCAATCAA      |
| 73 | cgd4_3950 | GTCACAGCAATTCTCAAATCCA      | CTTATCAGTTGCCGCCTTAATC      |
| 73 | cgd4_3970 | CAGTACCTGTAAGAAAGACAAGACCAA | GCTGCATTAGTTTGTGATGTGAAGAAG |
| 73 | cgd4_3980 | TGATCCAATAATACCATCTTCCATT   | AAGTTCCTTAATTGACTGGTTGAGA   |
| 74 | cgd4_3990 | AATGGCCCTCCAATAACTCA        | CCTTGATTTCTCGTATATTTCTCCA   |
| 74 | cgd4_4000 | AATACATACCATCCTTACTGCTTGG   | TGGCATCCTCAATAATCTGCT       |
| 74 | cgd4_4010 | GATACAATGGGAGGTGCAAGA       | TCCATGATTAGTTGGAAGAGCA      |
| 74 | cgd4_4040 | GCAAACCTAACAAAGGCGGA        | GTGAGAATGATCTTGAGGAGGG      |
| 74 | cgd4_4050 | ATTGTTGATCGTGTGGTAAA        | GCAGTACCTAATAAAGTTGGTGGAA   |
| 74 | cgd4_4060 | CCAATCTGTGAAATGTGTGATGT     | TTCTTTCTGTTGAATGGTGTGG      |
| 74 | cgd4_4080 | CTTGGAGGTTTACCAGAAGGTTT     | ACACCAGATACTTTGCCCTGTT      |
| 74 | cgd4_4100 | ACAGAATGTGCTCCACCAAGT       | ACTGTAACCAAGCTAATGCGGT      |
| 74 | cgd4_4110 | CTGTGTTGTTGGATGGGATTT       | TTGCTTAATGGATGGTCTTTCTC     |
| 74 | cgd4_4120 | AGGCGAGAACAAGAAAGATGAA      | ATTTGAGGCTAAGTTTGGAGCA      |
| 74 | cgd4_4140 | TGTAAGAAATGGAGAACCACCAG     | TTGAGCATTACCATACCAAGA       |
| 74 | cgd4_4220 | ATGAATACTTTGGGAGGATGGA      | TTGTCGCTCTGTGAGTAAATTCTT    |
| 75 | cgd4_4230 | GGAGAAACAGGGAGTGGTAAATC     | GCAACATACTCTGCCAATGAAA      |
| 75 | cgd4_4240 | AGTTTCGGTTTAGACTTGGGTTT     | GAGTCCATTACTTTCTGTAATTGTT   |
| 75 | cgd4_4260 | AGAGTTATTGGACCCACTTGATG     | ACTATTGGAACCATTCTTTCTCGG    |
| 75 | cgd4_4270 | AGTAATGCGAAGGATGGGATAA      | AGAAGTGGGTTTCTCTAAATTGCT    |
| 75 | cgd4_4280 | TTCTATTTGGGAGTGTCTTCTGG     | AATGAATTAGTAGGAGCTGAAATGG   |
| 75 | cgd4_4290 | TTGAACATCCAGTGAACCATTT      | AAATCTTGCTCTTCTTCTGACCTT    |
| 75 | cgd4_4300 | CAGCAATGACAGTAGGGAAAGA      | CAACTCTGGCTGTACCTTAGCA      |
| 75 | cgd4_4310 | AACAGGCAGTATATTTGGAGGATT    | AACCGACTTTCTGGACCTCTT       |
| 75 | cgd4_4320 | TCAAATGGAGATGAAAGACCAG      | ATCAAGCAAGTCGTGTTTCTAGAG    |
| 75 | cgd4_4330 | GAAATGTTGCTTCGAGTGGTTT      | TTAAGAAATGTAGCCCTTTCTGCT    |
| 75 | cgd4_4340 | TGGGATGGATATGTTTCTGAGT      | TATTTGCGGTCTCCTTCACTTT      |
| 75 | cgd4_4350 | TGATGTTAGCAGGCAAGAAGAA      | TTGTTTGGATGGACAGTTTGG       |

|              |                           |                             |
|--------------|---------------------------|-----------------------------|
| 76 cgd4_4360 | GACAGATGAATCCGAAGCAA      | CCAAGCTCTCAATCAAGTCCA       |
| 76 cgd4_4370 | GGAAAGAACGGACTCAATAAGAAA  | AATTCCTGTTTCAAGGCCAA        |
| 76 cgd4_4390 | AGACTTGGGATACACTTTGGGA    | TCTTCTCTGCATCTTCTTGATTCT    |
| 76 cgd4_4400 | GCAATTCATCATCCAAGCAA      | TGGCTAATTCTATTCCAAACCC      |
| 76 cgd4_4410 | AATACCGAGCCAAACCTAACAA    | ACCTGCCTCTTCTCCGATTAC       |
| 76 cgd4_4420 | CAGGAAAAGTAAGCCAAGCAGA    | GTTGTAGTGCCTCCATCTTTGA      |
| 76 cgd4_4440 | ACGAGCCTACAATAGAAGCACAG   | ATGCGAAACGATTACAACACAG      |
| 76 cgd4_4450 | TATTGCACTTCTCATCGGTTTG    | CTACAACAGGACCAGATACCCAC     |
| 76 cgd4_4460 | GGAGTTGTGACTTGGGATTAGG    | GAGTGC GGCTTAATTGTTCTTT     |
| 76 cgd4_4470 | GTGTAGATCGGGACTTGGTGAG    | GGGCCACCTCTCTCTAGCTTT       |
| 76 cgd4_4480 | AGAAGAGCAAGATGAACCAACC    | CCAGAACTCACTACCAAGCAA       |
| 76 cgd4_4500 | CCATAAATGTCGGTAGCAGGA     | TAGAAATTTGTTGCGTCCAAGA      |
| 77 cgd5_20   | AAATTCATCAATACCACCACC     | ACAATTCCTGAGTTCTTGGTTCA     |
| 77 cgd5_30   | TGCAAATGAAAGAAGATTGAGTAGA | CTGAGGAGCTTAGAATTGGAGTAA    |
| 77 cgd5_40   | AACTGGAGGATATTGCGAAGAA    | CGAAGCAGAATTAACAATCGAAG     |
| 77 cgd5_50   | GAGCAGGGAATTAAGGGAATCT    | AATGGCACTCTTTGTATTGGGT      |
| 77 cgd5_60   | AAATCAGGAAGTGGACAAGTGG    | TCATCAGAAATGCTCTCTCCAAG     |
| 77 cgd5_70   | GACAGCAGTAAAGATGGAGGGA    | TGTGATTGATTTGGAGGCTGA       |
| 77 cgd5_80   | CGTGGATTATGAGAGTAGTGAGTTG | TACAAGGTTGCTTATCATTGGG      |
| 77 cgd5_100  | CCAGCAATAATGTCAGCAGTGT    | ATAGCGGGAGTATCATGTGGTT      |
| 77 cgd5_110  | TGGTGAAATAGATCCAAATCCTG   | CTCTCTCTTGCCTTCTCTTTG       |
| 77 cgd5_120  | AGCCAAATCGTAGTTCTTTCTCC   | GCATACGCACTTCTTCTCAA        |
| 77 cgd5_130  | AGAATACCAAATCCAATCCCA     | ACCCAATAAGTCCATGATCCC       |
| 77 cgd5_150  | ATGGTAGCAGAAATACGGAGGA    | GCTTCTTTGTTTCGGAGGAAG       |
| 78 cgd2_30   | GAAGATTTGCTTCTCCTCCAAC    | TCTTGACATGCACCAGGATTAC      |
| 78 cgd2_60   | GAAGCTATTGGAGGTGTGAAGG    | TGATGGAACAATACTGAGGCA       |
| 78 cgd2_80   | ATGTAGGATCAGTGGCAACAAG    | GTCCAAGCAACCATATTTGAGTAA    |
| 78 cgd2_100  | CATCAGCACTCCTCAAGAACA     | GGGATCTAATGCCTCATACTCAA     |
| 78 cgd5_170  | TCTTCAACATCCTTCTCCAGTT    | ACTTCTGACGATTCCCATTCA       |
| 78 cgd5_210  | GCTGAGATACCTGGGATAGGA     | AGGATGATGATGAGGAGGAAGA      |
| 78 cgd5_220  | GATGATGATGCTTATGGTGGTG    | TTTGTGTTTTCGGAGTTCTT        |
| 78 cgd5_230  | AAGACAAAGAGAAGAAGCTGAAAGA | TGAATTGTTCCATTATCACCAA      |
| 78 cgd5_240  | CTTCTCAAGATTGGTCAGATTGG   | TGATTGACTTTCATCCTCACTATCA   |
| 78 cgd5_300  | TCAGAAATTGGTTCAGGTGATG    | GGATTCTAAGCTGATTTGGAGGT     |
| 78 cgd5_310  | AGATGGTATGGATCAAATTCAGG   | AAAGCGTTCCTTTCGACTTT        |
| 78 cgd5_320  | GGATATAGTCAAGGTGGTGCATT   | AATTTCTTCATTGCTCTTTCAGGT    |
| 79 cgd2_140  | ACATTGATAAGAGAGGAAGTGTTC  | GATGATTGCTGAACCTATAACTACAAA |
| 79 cgd2_160  | TGCACAAGATATGAAAGGCTCA    | TGCAATAACTCTTCTACCAGCAA     |
| 79 cgd2_180  | TGTGGAGGAGATGGTTATTCTTG   | ATTTCCCTTCCAACCTCATT        |
| 79 cgd2_240  | TACGCTCTGGTTTATATGCAGG    | GATCTTTGCTTGCCACTCATT       |
| 79 cgd2_250  | AAGTTAATGGATGCTGAGGTGG    | AATTGTGCCTCTTCTCTCTCT       |
| 79 cgd2_260  | AAGCTCCAGAAGATAGTTCCC     | TCGTCCTCATAGTTATCGCTTTC     |
| 79 cgd2_290  | AAATAGGGTAGGCATTCAACCTAA  | TGTTTCGTATCAAGAGTTGGAGAAG   |
| 79 cgd2_320  | AATTGGAGAGGATGATTGTAAGAA  | TCTTTCCCACCCTAGCATAAC       |
| 79 cgd2_330  | GTAGTTTCATTAGCATGGCAACC   | AGTTGTTGACCCTGATTCTGT       |
| 79 cgd2_340  | GCAAGTTATTAGAGGCATTAC     | CTCCATGTTGACTCCCATTCTT      |
| 79 cgd2_370  | ACAGCCAGCCAGAACTCAA       | TGCACCATCAATTCTATCTTCTTCT   |
| 79 cgd2_390  | CAGTCTCAAGAAGGTAATCAGGG   | ATCAGGTCTTCCAATCCTAACA      |
| 80 cgd2_440  | TTCCTTTGATGGCACTCGTC      | GGGAAAGTAGGGCAGCAGAA        |
| 80 cgd2_470  | TCAGATGGTACTTGGAGATTG     | AATGAAGATGGTGGTTGTTGTG      |
| 80 cgd2_500  | GAAGTAGGTCGTCCAAGCAGG     | ACCAGAAATCTTGCTCTTCCATC     |
| 80 cgd2_510  | GAGCAGAATCGTCCATATTCAGT   | AGCTTCCATTTATCCTTGT         |
| 80 cgd2_520  | TATGCGCTATTGTATCACACC     | CCATTGCATCCCTGTTAATGT       |
| 80 cgd2_550  | ACTCAAGAAGCACACAGGGAA     | GCACTATCAGCCCAAAGTAACC      |
| 80 cgd2_560  | TCTTCAAATGTTGAGTGAATTGGT  | TTGGTTCTTCTATCTGCTTCTT      |
| 80 cgd2_570  | CCTCAAAGAAAGGAGCCAAGT     | AACGTACCCAACCTCAGAAGGAA     |
| 80 cgd2_580  | CTGACAATAAATGCAATCAGCC    | ATTTCCAGAACCAACATTACC       |
| 80 cgd2_590  | TGTGCTTAAATATGCCGATAACA   | CAAGAAGTGAACAGCAAGAA        |
| 80 cgd2_600  | CAAGACTCATAGAGCAGCCTCA    | AAATACTCAAAGCAGCCTCCAC      |



|    |           |                             |                          |
|----|-----------|-----------------------------|--------------------------|
| 80 | cgd2_630  | AAGAATTTGGAGGTCAGGAAGAC     | AGTACCGGAGATAACAGGCTCA   |
| 81 | cgd2_660  | TTGGAATTAATCAGCTTCTTTGG     | AAGATCATTTGCGTTCGAGATT   |
| 81 | cgd2_670  | TTCAATATGATGCAAAGTATGAGAAGA | CGTGATAAAGAAGCAGAGATTGG  |
| 81 | cgd2_680  | TCAGCAAAGGAGTTGTTGGTAG      | CTCTTCCTGTCCCTCATCTTGT   |
| 81 | cgd2_690  | ACGGTAATGGTAATGGTAACGG      | GCCTTGCCATATTGGTTATGAG   |
| 81 | cgd2_700  | CATCGTTCAGATGAGGTATCTTTG    | CCTTGTTCTTGTCTTTGGTCTTG  |
| 81 | cgd2_710  | TTCTGGTAGCAACATGGTAATTCTT   | ATGTATTGGATGCCTTCTTGGA   |
| 81 | cgd2_780  | AGTTACAACAGCATCAAAGCCA      | TTGCATCTTGGGTCGTTTACT    |
| 81 | cgd2_790  | CGTTAGAAGATGGATTGGAAGG      | AACCACAATTTACTGGGCATTT   |
| 81 | cgd2_800  | TGAAAGCGATACAGATGATGGT      | GTTTGTAGGGATTAGCTGGTCAA  |
| 81 | cgd2_850  | CGATCTCCCTCCAGATAACAAC      | GGAAGTCCTGCAATATCAACATC  |
| 81 | cgd2_860  | GAGCAGCAAGGAAGATAACTCAA     | TCTAGCAACAGAAGCGACAGAC   |
| 81 | cgd2_870  | GTCTTCTTCAGGTATTTCTCGCA     | TATCATCAACTCCAAGAGCCAA   |
| 82 | cgd1_10   | TTTATTCTGTGTTGCACTGG        | ATAAACGCAAAGATTGAGGCAT   |
| 82 | cgd1_20   | GAACGCTTATGTA CTGCCTCT      | TGCTATCTGTCTTGCTCTCTCG   |
| 82 | cgd1_30   | TCCAGATGGGAAAGTTCTGTTT      | TCTGTTCTTCTAGCCTTGAGC    |
| 82 | cgd2_880  | GAGAGGTAGTAAAGCGAACGGA      | TTCTGTGATTCTAATGGCAA     |
| 82 | cgd2_890  | TAAGAAGGGTGAAAGGGAACAG      | AGGCAGGCTTGATAGGAATACA   |
| 82 | cgd2_920  | TTCCCACTTCCTCCTTTAGACA      | CCCTCATCAGTTAGAACAACCC   |
| 82 | cgd2_930  | ATACTTGCCCATTTGACTTCGT      | AGTTCTCGTGCTTGTTCTTATT   |
| 82 | cgd2_940  | CAAATATAGCCGAACCTTCCAG      | TTCGTCATCAAAGTCATCATCC   |
| 82 | cgd2_950  | ACCTAGATAGCATGAATCCACAAA    | TCCAAATAACTCCAGATTTCCC   |
| 82 | cgd2_960  | GAGTTTCTAGGGATTGACTGGG      | TAAGCATTTCTCGTGTGTCTC    |
| 82 | cgd2_970  | ATATGAACCCAGA ACTGCAACA     | GCTTTAATAGTCCAAGGAGGCA   |
| 82 | cgd2_1020 | TGTAGGATTGGAGCAAATGAAA      | GAAACAATATCCGTGGTGGAA    |
| 83 | cgd1_60   | ATCTGGGGAAC TTTTGCAGTA      | CACAGGAGGAAC TTTATCAGGG  |
| 83 | cgd1_70   | AAGGCAAATTC AAAACCAAAAA     | ATAACTCTCGCTTTCCA ACTCG  |
| 83 | cgd1_80   | GCAGAATGGCAAATCACATTA       | TTTTCAGGTTTGGGTGGTATTC   |
| 83 | cgd1_90   | GGGGTCTGTGAAATGGAAAATA      | AATAAGAGAGGCTGCATTGCTC   |
| 83 | cgd1_100  | TTGAAAATAAGTT CGGGGCTAA     | TCATAATTTGGTGGG GAAAATC  |
| 83 | cgd1_110  | TTAGAAAATTCGGCTCAGATTCA     | AAAAGCCCATTCAA AACGACTA  |
| 83 | cgd1_120  | AGTTGCTCTCCTGATTTGAAGG      | GGAATTAGAGACGAGAAGCCAA   |
| 83 | cgd1_130  | CTGAAGCTCGAAGAGGAATTGT      | TTTCCATTTGAGTTGTGATTGC   |
| 83 | cgd1_140  | ATTTTGAAGCCGTAAATGAGGA      | AACTTTGCTTCTTCCCACAAAA   |
| 83 | cgd1_150  | AGCTATGGAAGGAACTGCAAAG      | TCAGAGGAGGCTCAGATAAAGC   |
| 83 | cgd1_180  | CTGCACTAAGAAAGGCAGGAGT      | AAAAATTCCCATTACCCCATTC   |
| 83 | cgd1_190  | TTTAACTCAA ACTCAGGCGGAT     | AAATCCGTAAGCAAGGCAATAA   |
| 84 | cgd1_200  | CACAGATGGGATAATTTGGGTT      | TGACAAACCAAGAGCCTAACAA   |
| 84 | cgd1_210  | TTTTGCATTCCAGCATACCAT       | AAAGATAGGGTCCAAAATGAATGA |
| 84 | cgd1_220  | CAA ACTATGGAATGTGCAGACG     | CCTCCATGCCCTGTTAGAAATA   |
| 84 | cgd1_230  | GAACAGAGCACCAAATGTACCA      | GACACAATTTCTCTCCTGGCTT   |
| 84 | cgd1_240  | TATGTTTGCACGAGGATGATTT      | TTGTTTGATCTTTGTGGCTTGT   |
| 84 | cgd1_250  | TCCATAGAATTGGTAGGGTTGG      | CGAGCCTCTTGATTCTTCTCAT   |
| 84 | cgd1_260  | TCAATGTAGTAGGCTTGGGGAT      | GGAGCCAGATTCTTCATTTGAT   |
| 84 | cgd1_270  | AACAGCACCAAAAAGTGAGACA      | GGAATGTCACGTCCAGGAAT     |
| 84 | cgd1_280  | GTTTTATTCCGCAAAAAGTCAGG     | GCCTGGAAAAATGAAAGACAAG   |
| 84 | cgd1_370  | GGGAGATCAGATGAAGATGGAG      | TTTCGGGTT CAGAAAAGGATA   |
| 84 | cgd1_380  | CTTTTGGAGCAATAGGAGCATT      | TTGATGAATTTGTATCGGCTTG   |
| 84 | cgd1_390  | TGATGAAAATGTCCAAATCCAA      | CTTCAATTTCTGTACGGCTTC    |
| 85 | cgd1_400  | ATCAAGATGAACTGGTTGCTGA      | CCCTATGACATCCTGTTGTGAA   |
| 85 | cgd1_410  | GGCTTTTCTGTGGGTTTAGATG      | GATGCCACATTTCTTGTTCAAA   |
| 85 | cgd1_420  | ATTGGAATAAAAAGGCCAGATT      | AGTTCCTCCAACACCTTGAAAA   |
| 85 | cgd1_430  | TCGCAAATAAAGCAGATTTTGA      | GCATTGCTTGAGCATGTTGA     |
| 85 | cgd1_440  | ATTTGCCATTAGACCAAACGAC      | GATTCCCATCATCCCTACAAGA   |
| 85 | cgd1_450  | TTGACCAATTTTGAACGATGA       | CTTGAAAAGGAAGATTTCGGATG  |
| 85 | cgd1_460  | TCGAATGAAGGATTTTCCAAG       | GGTGGCTCCTCATATTGGTTTA   |
| 85 | cgd1_480  | TTTCATACGATCCCAAGTCAAGT     | GGTTTCGTGAGA ACTGGATGA   |
| 85 | cgd1_510  | GAGGAGTTGGAGGAGGGTACT       | GAAGTTTTGAAGGCCACATCTC   |
| 85 | cgd1_540  | TGCATCATGTGGTGTAAATGAGA     | ACTAGCAGCACAACTGAAACCA   |

|              |                         |                         |
|--------------|-------------------------|-------------------------|
| 85 cgd1_560  | AGTGACCTTCATAGCCAAATTCA | TTAGGCTTCCTTACATCCCAA   |
| 85 cgd1_570  | TTCCCAAGATGAAGCTCTTTGT  | AACTGCCATTGCTGCTCTTAAT  |
| 86 cgd1_580  | CCTGGAGCAGGAAATATGAGAC  | AATAAAGCAGCCTTTGCTGAAC  |
| 86 cgd1_590  | ATTTTCGAGTCTTTGTACGGGA  | TGGAGCCATTATATCCCATTTT  |
| 86 cgd1_610  | CAGTGAACAGACTTCGATTTGG  | CTGGATTTCTTGTTCTTGCCTT  |
| 86 cgd1_620  | TCTTCAAACCAGGGCAATACT   | TCCTTTAATGATTGGATTTTCGG |
| 86 cgd1_650  | TCATTCCGCTAATAATCCCATC  | AAAAGGTCATTAAGCGCAGAAA  |
| 86 cgd1_660  | GCTCAGCAGATCAACAAATCAC  | TTCAATGGGCTCTGAAGTTGTA  |
| 86 cgd1_670  | CAATGGAAGCATGGAGTGATAA  | ATTGGCTTTGGCTGACTATGTT  |
| 86 cgd1_680  | GGAGGTTGAAAAGAATGCTGAA  | ACGTCCTCCTTAGTTTTGGCTT  |
| 86 cgd1_690  | GGAGCAAAGTCAATCCGAAATA  | TGATCCCTCTGGTTTGATGAAT  |
| 86 cgd1_700  | TCAAATTCAAAATCATTCTGGG  | TCTGTGGCAATATCCATTGAAG  |
| 86 cgd1_720  | TAGAAGGTTTGTAGGGGGTGA   | AATCTGCCACTATTCTCCCAA   |
| 86 cgd1_730  | AATTTATGATCCAAGCAAAAGCA | CCAGTAACAAAAGAAGTGGGC   |
| 87 cgd1_740  | ACACAGGAAAGGACAACAAGGT  | TTGACCAACCTTTATACCCAC   |
| 87 cgd1_750  | GAAACTGTGATACCCTTCGTC   | GACATATCCATCCTCTGGAGC   |
| 87 cgd1_760  | TTCGTTAATTCATTGGAAAGGG  | ACCTCAAACCGCTAGAATTGA   |
| 87 cgd1_770  | CTTTTCATCCTTGTTGAGGCTT  | TGTATTATGCTTTGGGTGTTGG  |
| 87 cgd1_790  | CATGAACCTTGAGAACATGGAA  | TCCAGGGATTTAGTACAAGGT   |
| 87 cgd1_800  | TGGGCCAGACTTACTGAAAAT   | TTCTACAATGACCACACCAAGG  |
| 87 cgd1_810  | AATTGGTGGAAGACTCAAAGGA  | ATTGCAGTGGATTTGATGATTG  |
| 87 cgd1_820  | TGCAAAGGAAAGGCAATCTAAT  | CCATAGCCAACACAAGAATCAA  |
| 87 cgd1_830  | CTGTTGATGGTTTTCAAGGTCA  | TAAACCCTGCATTTGTCTTCT   |
| 87 cgd1_860  | AGGTGAGTTTGACTGGTTATTGC | AGACCCATTCCATCCTTGATT   |
| 87 cgd1_890  | TTGGAGCAAACGATGACATTAC  | GGCTGAATAGAAGAGTGGGATG  |
| 87 cgd1_940  | AAATGCCTCCTCTGGATGTA    | TTCAACAAAACAGACATCAGGG  |
| 88 cgd1_950  | GGAGTGGTATCGGTAAAATCCA  | AATTGTTTGGGTATTTGGTTGC  |
| 88 cgd1_960  | AGGCCAGATTTAAGGTATGCAA  | ATGGACACTCAGCCCTACATTT  |
| 88 cgd1_970  | CATGAGAAACAGTTGCATTGGT  | ACCCATTGATGTTGTTATTCCC  |
| 88 cgd1_980  | TCTGGATGGTTTCGTTCTACT   | ATCCCATTGTTTTGTGAATCC   |
| 88 cgd1_990  | GGGCCAACATCTGATAGGTTTA  | ACATTTCTTGGTTTTCGTGCTT  |
| 88 cgd1_1000 | TTGGAAACAGCAATGTGAGAAT  | TTCCAGAACCAAGATTACACCA  |
| 88 cgd1_1010 | TTTGACCATGACGAATTTATGC  | GATCTTGCCGAAGGAATTGTAG  |
| 88 cgd1_1020 | CTAGTGGGATAAAGCCATCTGC  | TCTGGCAAAAATAAAGCTGAAA  |
| 88 cgd1_1030 | CTCCACATACATCACTTTCCCA  | GTGTTTCTGAGTCATTTGTTGTC |
| 88 cgd1_1050 | TGGATTATTTGTGGGGTAATCTT | AGATCCAGAGAACACAGGAAGG  |
| 88 cgd1_1060 | ACGGAAAAGAATAGCCAAATCA  | TCTTTCCTCATACCGTTTCGAT  |
| 88 cgd1_1080 | TTATGAGAGTCCCCAACTGCT   | CCATGAAAATCAAACGAACAA   |
| 89 cgd1_1090 | CATGAAATGCACAAGAAGGAAG  | GCACTATTTGTTCCCATGTTGA  |
| 89 cgd1_1100 | GGATTCATGCTTTTTAGGTTGC  | ACTCTTCTGCTACCCACATA    |
| 89 cgd1_1110 | AACTTTTATGAATGCTGGTGGG  | CCAAGTCCATTACGGCAAGTAT  |
| 89 cgd1_1120 | TTGTCAAAGCTATAAGGGCACA  | CTCGTCACTCCTATTGTTGCTG  |
| 89 cgd1_1130 | CGCATATCCAATTCAAGAACA   | CGATTTAAGTCCGTTTTGGAG   |
| 89 cgd1_1140 | AAGTTCTTCTCAAGCATGGAGC  | AGGACCTTCAAGCCATAAGTGA  |
| 89 cgd1_1150 | ACATGCTTTGAATGTTCTGCAT  | AGTTGGATTCTTCTGAATTGGC  |
| 89 cgd1_1160 | TGACGATAAAAATTGCATGGAG  | TTCTTGGTATCCCCTCCCTATT  |
| 89 cgd1_1170 | CTTCTAAGTTTGGGAGGGGACT  | AAAATCATGCCTTCTTCTCTCG  |
| 89 cgd1_1180 | CAAGATGGCTGTTGATATGGAA  | CCCATTAGACTCTTTGGTTTGC  |
| 89 cgd1_1190 | ATTTCCGGCTGTGTATCTTCTC  | TTGTAAAAGCCCTCCTATACCG  |
| 89 cgd1_1210 | TTGGAGAATTAGCAAGGGTCAT  | CTTCTTGCATCTCCTGGATCTT  |
| 90 cgd1_1220 | CAAACGCTCGTATCTTCTCT    | GTGAAGGTTTCTTGGAGTTTG   |
| 90 cgd1_1230 | TATGACAGCCAGAATTGGTCAG  | GGTTCTCAATGGACCCAAAATA  |
| 90 cgd1_1240 | ACCCCTTCAGATTTTACCCAAT  | CATGGGAGTTTTGTGAGATCAA  |
| 90 cgd1_1250 | AGTGGTAAGGCGTCCAGAATTA  | TGGCCTCATTCAACATAACTG   |
| 90 cgd1_1260 | GAAAGCCAGAAGGAGAAAAGTG  | TGTTACCAGGATCTGAACCAA   |
| 90 cgd1_1270 | TTAACTTGGTCAGGCGTACCTT  | TATTGTCCTCAAATCCCATTCC  |
| 90 cgd1_1280 | GACCAGAGGAAGAGTGTCCAAC  | TAGATCCTCAATGTGGTCATGC  |
| 90 cgd1_1290 | TGACTTTGATCGCTTGGTAGAA  | AACCTGTGCGGCAATAGTTAGT  |
| 90 cgd1_1300 | TTTCCGAACCTCCTATGAAAA   | ACAAATGGCTTTCAGGAACACT  |

|    |           |                          |                          |
|----|-----------|--------------------------|--------------------------|
| 90 | cgd1_1310 | ATCTATTAGGGTTGACTGGGCA   | TGAGATGGCGCTGTAAAGATA    |
| 90 | cgd1_1330 | ATCAAAAATTCGGCTTCTCAA    | TCTGGCATCAAGAAGATAAGCA   |
| 90 | cgd1_1340 | TTTTGGGTAATAAGCTGGATGG   | GCATTTTCGACCTCTATGGAAC   |
| 91 | cgd1_1350 | CATCGACTTTTGGAAATGAACA   | ACTGCCAGAAGATCCAACAAT    |
| 91 | cgd1_1360 | TCACCGGAAAACAATGATGATA   | TTTCGGAACCTTAATCTGTGCT   |
| 91 | cgd1_1370 | GATGTGAATAGTGATGGCTGGA   | CCATCTCCGTCTTTATCTGCTT   |
| 91 | cgd1_1380 | TGACCAAATCAACAAATATGGC   | CACCACTACAAAGATGACAGGG   |
| 91 | cgd1_1390 | CCAGGTTCTCTCTGCTCATCTT   | CCTGGTCAACCTCTTCAAAAAC   |
| 91 | cgd1_1400 | TATAATTCCGTTTCAGCCCTGT   | AGCTTGTGTTCCCTGATTCAAT   |
| 91 | cgd1_1410 | TCAGTCCAATCATTCTGTTTCTG  | AAGGCTTCGTTCTTGTCTTTG    |
| 91 | cgd1_1420 | AACGTATCCATTCCATTCTTCG   | TTGCCAACCTTGACTTCCTTT    |
| 91 | cgd1_1430 | GAACTCAAATCAATGCAGCAAC   | AATATGGCTCTTTTGAAGGATCAG |
| 91 | cgd1_1440 | TAGAAAGGAGCTTGAATCGAG    | ATACATTTGCTCTTCCAGCCAT   |
| 91 | cgd1_1450 | TCAAGCGAAGAAGCAATTAACA   | ACGCTGGATTGTTGAGGTTAT    |
| 91 | cgd1_1460 | ATTAACGACATTGGAATTGG     | CCTGTTCAACTTCATTGCTCTG   |
| 92 | cgd1_1480 | AAAATACAGCAAGTGGGGCTAA   | CGCAGAATTAGACGATGATGAA   |
| 92 | cgd1_1490 | GTCCATTAACGATGCAGAAACA   | TTCCAGACAAATAGCCTTCCAT   |
| 92 | cgd1_1500 | AATTAAGAAAAACACGAGCCGA   | TACCAGAAGAAACCTGTGCTGA   |
| 92 | cgd1_1510 | CCCAGAAGTAACAACCTCCAAGG  | AATTCCAGCCCAATTATCTTCA   |
| 92 | cgd1_1520 | ATTGGAAGAAGATGAATGCGT    | AAATGCCCAAATAGTCCAAATG   |
| 92 | cgd1_1530 | TTTATGGCACTACGAACAAAGC   | GGTTGAGTAAGGACCAAGAATGA  |
| 92 | cgd1_1550 | ACGATGAGGGACTCTTATGGAA   | GCTATTGGAAGTAATGGATCGC   |
| 92 | cgd1_1560 | GTGAAAGCAGTTGTGTTTCTGG   | GAGAGCTAGACGGGCTATTTGA   |
| 92 | cgd1_1570 | ATCCTTGACAATAGCGACGAAT   | CCCTAGTAAACCTTTGCCTCCT   |
| 92 | cgd1_1580 | ATGATAGCAATAGCGGAGGTGT   | TACAATCTGCCTCTAACCAGCA   |
| 92 | cgd1_1610 | TTAAGAAATCCAAACATTGGGG   | CTTGACTAATCTGCCTCCATCC   |
| 92 | cgd1_1630 | AGAGATTAGGTGGGCGGATATT   | AGCGTTGAGCTTTTGTGCTT     |
| 93 | cgd1_1640 | AACTGAAGCGTTAATTTCCCAA   | AATGGATTGAGTGGCTTCCTTA   |
| 93 | cgd1_1650 | TTAATGCAGATTGGTGTAGTTTGA | TTTGCCTGAAACAAAAGACTGA   |
| 93 | cgd1_1670 | TTGGCATAAACTCTGCTGGTA    | TTAGCGAGTGAGAAAGTTCACG   |
| 93 | cgd1_1680 | AAAGCAGGTTTTACTGTTGGGA   | ATTCATCGTAGCTTTCAGGAGC   |
| 93 | cgd1_1690 | AAACAAAGGAGATTACCGCAA    | CGCTAGGTATTGGGTGAAAAAC   |
| 93 | cgd1_1700 | TATACCTCCTCTCCATGCCAGT   | ACAAGAACTCAACCCTACCGAA   |
| 93 | cgd1_1710 | TGCTGCAAAAGATGAAGAGAAG   | GCTGTTTCCTTAGCCCTTGTTA   |
| 93 | cgd1_1740 | AGCTAAACAAAGGCTAAAGGCA   | ATCTTGAGCTTCCATTTCTCGT   |
| 93 | cgd1_1750 | TTTTGGGGTGTAGTATGTCGAA   | CATCCCACTCAATTTCAATGTC   |
| 93 | cgd1_1760 | ACTGGTGAAGAAGTACCCCTGA   | CCACATCATTTTGTGATGGG     |
| 93 | cgd1_1780 | AGACCCACACTTATCCATCAGG   | AGTTTTTATCGAATCAGGGCAA   |
| 93 | cgd1_1790 | ACATCTTTAATTGGCAAGGCAT   | TACGGTCTTGGCCTGAATATCT   |
| 94 | cgd1_1800 | ACCGTGGAGAAAAGATCAAAAA   | GTCTGTCAACGAATCATCGGTA   |
| 94 | cgd1_1810 | GCTATTGGACAACATCAACCAA   | CAAGTCACGCTTTGAGAACAAG   |
| 94 | cgd1_1820 | GCTTGGTCCATTTCTTTAATGC   | CATTGACATAATTTTATTCCCA   |
| 94 | cgd1_1830 | TTTGGGGCGGTATTCATATTAG   | ATCCAATTTCCCTGGAGTTTCT   |
| 94 | cgd1_1840 | GAATATGGCAACGGATATGGAT   | CACTGATAACGTAAATCGCCAA   |
| 94 | cgd1_1850 | CTGAAACATCGTCAAGTTCTGG   | TTCCCACATCGAATATCTTGC    |
| 94 | cgd1_1860 | TTTGTTTGTGTTATGCCAAGC    | ATCCCCCTTTTAGTCAGTCCAT   |
| 94 | cgd1_1870 | TGTTGGAAAATGATGATGAAAA   | AACCCTGCTCCAGATGAAAATA   |
| 94 | cgd1_1880 | GGGAAAACCCACACTTTTATT    | ACCTGCATATTATTGCGATTCC   |
| 94 | cgd1_1890 | GCGATGGCCTAATTCTTACTGA   | AAAAGCCAACCTTTCGGGTAT    |
| 94 | cgd1_1910 | CAAATGGGCAGAAATTACCACT   | ATTTTACATAGAACGGCATCGC   |
| 94 | cgd1_1980 | TGGATGGAGAAGTTGATGTCAG   | CTAAAATGCAAAGCCCAGAAAC   |
| 95 | cgd1_2010 | CAATCGCCCTCTACCTACAAAC   | TGGATCGCTCTTTTGGTTATTT   |
| 95 | cgd1_2080 | TTAATGGGAGCTTCGGTCTTA    | TATCTTTTGAATGGTCTGTGCTG  |
| 95 | cgd1_2090 | CTGGGCTCTGAGTCTATCCAAT   | TTTCTTAGGGGACGAATGAAAA   |
| 95 | cgd1_2100 | TTGTGCTTGCTCCTATATGGTTT  | AAATGGGAAATAGCCTCGAAAT   |
| 95 | cgd1_2110 | TTATTGGGCCGTTTAGTACCAC   | TCTTTATGCCCTTTGTTTTCGT   |
| 95 | cgd1_2120 | TCAGATTTTTGTGTCCATCCTG   | TGCAATTAGCCTCACACATTCT   |
| 95 | cgd1_2130 | GCCAAAGTGATTCAATAGAGGG   | AGAGGGTAGGCATTCTAGGGTC   |
| 95 | cgd1_2140 | TATTTAAGCACGCAAATCCAGA   | CCTCCAGTTTGAAGGCAATAAC   |

|               |                          |                         |
|---------------|--------------------------|-------------------------|
| 95 cgd1_2150  | TATCTCACTCGCAAGAAGGACA   | GATGACCCCCTACAGCATACTC  |
| 95 cgd1_2160  | ATTTGAAAGCCGCATAGAAAAA   | CAAGTCTTTCCACAAGAAACCC  |
| 95 cgd1_2170  | TTAAAGGTGCGTGTATATGCGT   | TTCAGCCAATGGAAGAGTGTTA  |
| 95 cgd1_2180  | GCGCAAAGTAATTCAAACAACA   | TTTCCCCATACCATTTTGAGAC  |
| 96 cgd1_2200  | AGCAATCAGCTAACCCAGTAG    | TACGTTGCGCGAATCTAAATAA  |
| 96 cgd1_2220  | TTAGCACAGGAAGTGTTGGTTG   | GATATGTTTTGGGACCACGTTT  |
| 96 cgd1_2250  | TTTTGGCTCAATTCACTTTTCAT  | CCATCTCTCATAGTTGCGTTGA  |
| 96 cgd1_2260  | ATGGGATAACTCTGGACCTCAA   | GCCTACCAAGTTTTGTCTGCT   |
| 96 cgd1_2280  | AATAGGGGGAAACACGAGAAAT   | ACAGTCCATCTGTTTTGGAGGT  |
| 96 cgd1_2290  | AAAGCCAGGAGTTGACAAAAAC   | AGAAGCTACCACTAACGCTTGG  |
| 96 cgd1_2300  | CAACTTGCATTATACCGTTGGA   | AAATGAATTGCACCCAAGATTT  |
| 96 cgd1_2320  | GGAATGGAAAAGAAGTGAGAGTG  | ACTCACAAGCGTCATCTCTGAA  |
| 96 cgd1_2330  | ACCGATTACAAACGCAGAGAAT   | CACCGCATTCAAAGAGGATTA   |
| 96 cgd1_2350  | ATAATAAGGCACCCATTTGTCG   | TGGGATTGATAAAATGCTGTTG  |
| 96 cgd1_2360  | GAGATTCTGTAGAGGAGGCGA    | AGGAAGTTCACCACCGACTTTA  |
| 96 cgd1_2370  | TACAAAGAAAAAGGGCTGGAAG   | GAATCCAAAGATGAAGAAGCGT  |
| 97 cgd1_2400  | AGCGAAGTTCTTTGATTCAAG    | TCAACTACAATAAATCGGCACG  |
| 97 cgd1_2420  | TAAGCTGTCATCCGTCCTATT    | ACATTCACCTCCATCCAAAATC  |
| 97 cgd1_2430  | TGACAGCATTAAATCGTATGGC   | GGTCGAAAAGCAGAGAGTTGATT |
| 97 cgd1_2460  | GTTATATTAGACCGCAAAGCCG   | AATTGACACTTGTTGCATTTGG  |
| 97 cgd1_2470  | ACTTTATTTGCGGGAAAACCTCA  | ATCGGCTGTTTTATTGGAGGTA  |
| 97 cgd1_2490  | TTCAGGGTTAGATGAACAGGGT   | CTCTCACTGGCACTCGTAATTG  |
| 97 cgd1_2510  | ACGGAACATTTATTGCGACTCT   | AATGGGAATATGAAGCCATTTG  |
| 97 cgd1_2530  | CCTTGCTGTGACCAACTATCAA   | CATTTTTACCTGCTCCTGGTTC  |
| 97 cgd1_2540  | GGCAATTTATCAAACCTCCTGC   | AATGTCAATCTCATTCCCATC   |
| 97 cgd1_2580  | CTCTTGCTAGGAGGCTGTTGAT   | GACTCCAATAATGCCGTAGTCC  |
| 97 cgd1_2590  | GGGACGACAATGGAATAGAAAA   | GGGTTTCTTTAATGCTCAGTGG  |
| 97 cgd1_2600  | GTTGTTTGAAGGAAGTTGGGAA   | TGAAGCCCCCAGTTGATAATAG  |
| 98 cgd1_2630  | GAAATAAGCCACCAACAAAAGC   | AATAGCTTTGCATCTTTGGGAA  |
| 98 cgd1_2640  | AATTAACATGCCCTCAATGCTT   | TTGGTGCTTTGTAGAATGTTGG  |
| 98 cgd1_2660  | GCTCTAATTTATCGCCCTTTGA   | CGCATACAAAACAAAGTTCAGG  |
| 98 cgd1_2690  | CACCCTTGTTTCCTTTGATGA    | TCTGCCATTTCTCATCTTTTT   |
| 98 cgd1_2700  | AAACTTACTGTGGGCATGGAGT   | ACTTCCATCTAATGTTGCCGAT  |
| 98 cgd1_2740  | TTTGACGACAGCAACATTAACC   | CACAAGTCTTCCCCTTCTATGG  |
| 98 cgd1_2750  | TCAATTTTTATTGGGAAAGGGA   | CTGTCTTGATGTGAAACGGAAG  |
| 98 cgd1_2760  | CGAGGATGAATGTACCAGATGA   | TGGATATTGGAAGAAAAGCGT   |
| 98 cgd1_2770  | TAACCTGCTTCGAGATACAGCA   | TATCTGCAACAACAGTCCATCC  |
| 98 cgd1_2780  | ACTGCGGATACAACCACTTTCT   | GCAATGATTTCAAACGAAGAT   |
| 98 cgd1_2790  | GCCAGACTATCAGTACCAGAGGA  | GGATTTATTCCAACACCTTCCA  |
| 98 cgd1_2800  | AGTTTCATCTTTTCCACCTCCA   | TTTAACATCATCAACTCCGCTG  |
| 99 cgd1_2810  | GAATTTGGTAAAAACCCCCATT   | ATTGCATTTCCAGCTCCATACT  |
| 99 cgd1_2830  | TATTGGCATCAGAAATTAGCCA   | GTTGAGCATGTTGCTGTAGGAC  |
| 99 cgd1_2840  | TTGGCAAAGTTATTGTGACAGG   | AATTTTTCCCTTTTGGTTGGTT  |
| 99 cgd1_2850  | TCTGCATTTAGAGCAATAGCCA   | ACTTACATTCTGCCTCCCGATA  |
| 99 cgd1_2860  | TGAGCAAGGACAGCTAAAATCA   | ACATAGAAATCTTCCCCAGGT   |
| 99 cgd1_2870  | AATTTTCATGGTTAATGGAACGG  | TTTTGTGACGAACTGAAACACC  |
| 99 cgd1_2880  | TGCAACTAAACCTCACCTAATGAA | TCTAATGGCAGTGTTCACATAA  |
| 99 cgd1_2890  | TCAATTCCTTTAGCAGGTTA     | GTTATGCCCACTCCAACAAT    |
| 99 cgd1_2900  | TGCTAGAAATTGCATCCAGGTA   | GCAGATGTGATTAGGAGTGCTG  |
| 99 cgd1_2910  | TTATGGTTGGGAATCTTATGGC   | TAGTTGATTGATTCTTTGGGGG  |
| 99 cgd1_2920  | TCTAAAAATGAGGCAGAAAGGC   | CGATCCCAAATCTTTTCTTGAG  |
| 99 cgd1_2930  | AAAAGCAATGTTGGGCTTTCTA   | AGTTCTTGAAATGATTGGGG    |
| 100 cgd1_2940 | AGAATCCATTGACCTATTGGGA   | CCAAATCTTGTTCCCATCTC    |
| 100 cgd1_2960 | ATGCTAGTGGAGAGGAGTGGAG   | TTTGGACCTGAAACCTCAAAGT  |
| 100 cgd1_2970 | ATCATCATCTAACGCCACTCCT   | GGAATCCACCTCCTTCTTTCTT  |
| 100 cgd1_2980 | TAATCCAGAGGGAGCAATGAAA   | GTTAGCAGACCACTGCATCCTT  |
| 100 cgd1_2990 | AATGAACGCAAGAATGGTAGGT   | AGGGAAATTAATGTGTTCCAAA  |
| 100 cgd1_3000 | AAGAAGGCCGTTGTCGTAATA    | CCTGGAGAAGTGGCTTAATGTC  |
| 100 cgd1_3010 | TATCCCTGCATTCTTAATGGCT   | GGAAGTGAAGTGGTGAAGGAAC  |

|     |           |                           |                            |
|-----|-----------|---------------------------|----------------------------|
| 100 | cgd1_3130 | GAGGATTTTGGGATGGATGATA    | AATGCTGCTAAAACATCCGACT     |
| 100 | cgd1_3150 | CATGCAGAATTTTTCGACACTTTTC | ATTTAACCACCTTTCGAGCATTACA  |
| 100 | cgd1_3170 | AGTTTGATTTGAACGATGGCTT    | CTTCCTCTTCCTCTTCCTCCTC     |
| 100 | cgd1_3180 | CCATGCAAATCCCGTATTATTT    | TGTTGAGTGGGGTAGAACCAG      |
| 100 | cgd1_3190 | CCATAAGAACTCCCTTTGATCG    | CTACTCCAAAAGAGTCGTGCCT     |
| 101 | cgd1_3200 | GCGCTCAGAAGAACGTAATATC    | TGGAGCATAGAATCCACCAATA     |
| 101 | cgd1_3210 | CTCCGATTTTAATTCCTCCTCC    | ACAGCATCAACCACATTCTTTG     |
| 101 | cgd1_3220 | CCAAAGTCAATTCCTCAAATC     | TGAGTGTAGATGGTGAAGGTGG     |
| 101 | cgd1_3230 | TAGGAATGGGAGCAAATCTGT     | ACTACTCGCTGTTCCAACCATT     |
| 101 | cgd1_3240 | TTTGGCAGAATTTATGGGAGAT    | TTATGGCTTGTTGAAATTGGTG     |
| 101 | cgd1_3250 | TTTGGTTATTAGTATTGGTGCCG   | CCCATTGAAGGAAGTGATGAGT     |
| 101 | cgd1_3260 | CTTTTGAGAGAAAATCTGAAATGGT | TAGATCCTGGTGGTCTTCCTCT     |
| 101 | cgd1_3270 | AACTTGGAAAACAAGCAAGAGG    | CAGAAAGAAGTGATTGAGCACG     |
| 101 | cgd1_3290 | GAAAGGAAGAGGGAAAGGAAGA    | AGGTGATGCCAATGTTGATGTA     |
| 101 | cgd1_3350 | ACATCGAGAATTTGGTTGGACT    | ACCAAGTATTGTTTTAATTCATGCTG |
| 101 | cgd1_3390 | ATTTCTTGTTCAAATGGATGGC    | ATACACGGGATTCTTCATCTGG     |
| 101 | cgd1_3440 | TGTTGACAGGACCAGCTAATTG    | CACTCATTACTGCATCAGCTCC     |
| 102 | cgd1_3480 | TTCAATCCTTTTGTGTGACTGG    | CCTCAGCATCCTTCAAATCTC      |
| 102 | cgd1_3490 | GAAGGACCTCCACAACAAAGTC    | TCCAATAAAAGATCCAAGTCCAA    |
| 102 | cgd1_3510 | TTGTACGCATTTCAATTCAGG     | GTTTGCTATATGCCTTCCGTC      |
| 102 | cgd1_3530 | CGTTCTAGGGGTTGTGGAGTAG    | TTTAGTGGAGGTCTTGGAGCAT     |
| 102 | cgd1_3540 | CTTGGTTTACTTCTGCTTGGCT    | TTGCAGATTTCGTGATTGTTACC    |
| 102 | cgd1_3550 | GAATGAAAAGGATGGTGTGATGGT  | TATTTCCATCTCAGTGGTGGTG     |
| 102 | cgd1_3570 | GGAGAATTTGATGGAGAAAACG    | TTCAGTTGGTCAAAGCCCTAAT     |
| 102 | cgd1_3580 | TGCGGATTTTCATTGTATATGATT  | ATCATCTCCGAATCTTTAGCG      |
| 102 | cgd1_3590 | GGAAAGTTAAGTGGGGAAGGAT    | CTTATCATTGTCATCAGCCCAA     |
| 102 | cgd1_3600 | ACAGGATCAAGCTCTAAATGGG    | ATGATCGGTAAAACAGCATTCA     |
| 102 | cgd1_3610 | TGGTGCTCCTTCTGAAACATTA    | ATAAGCCCAGCAGAAAATGAAC     |
| 102 | cgd1_3620 | AACACCGTTTGAAGACTTTCGT    | TTTTGGTAAACAATTTGCATCG     |
| 103 | cgd1_3630 | TGTAGAGATGGCTTGACTTCCA    | ATACAGAACTTTGCTCCGCTTC     |
| 103 | cgd1_3640 | TTGGTATTTGGTGGTGTCAAAA    | TCCGCTTACTGTAGATTGCTGA     |
| 103 | cgd1_3650 | GGCCGGATATGATTTTACTGTG    | AACCAGCTTCAAGTTTTGAGA      |
| 103 | cgd1_3670 | ATTCAGCGGATTTATTGGAAGA    | CATTTAGTGAACCAAAGCTCC      |
| 104 | cgd1_3750 | GGAGGATTTTCACAAGGATCAG    | TGATAAAGCACCACAGGATCAG     |
| 104 | cgd1_3790 | ATCCACAATTTTCTTCAGCGAT    | TTTAGCTCATGCTTGGCATCTA     |
| 104 | cgd1_3820 | AAAAAGGGCTTCCACTAAGGAC    | GTATTGTTTAGAATCGCTCCG      |
| 104 | cgd1_3830 | AGATCGGCACAAGAAGACTAGAGG  | AGCTGCACTTCAAACGTGATTA     |
| 104 | cgd1_3840 | CCATGTCAGAATTTGGAAGTGA    | CCTTACCCACCAAGATCATT       |
| 104 | cgd5_380  | GCATCTTCAACGTCTTCCTCTT    | CTGTTTCTGCTTGTGTTTCC       |
| 104 | cgd5_390  | TGTTGACCTTTCACAAACCAGA    | AAGAATCCCATCCATGAACCTAA    |
| 104 | cgd5_410  | TGTCAACAATAAACCCAAACGA    | CTTGAAGAAGATGCTCCAGTT      |
| 105 | cgd5_420  | TTCAACTCCAACCTCCATCTTCA   | CTCTTTCTTCCAATGCTCCATC     |
| 105 | cgd5_450  | CAACGATAGAAGAAGGTCACACA   | GAAGAAGAGGATGAGGATGAGG     |
| 105 | cgd5_490  | CTCAACCGTAATGAATGGAAATG   | TCCACGGAAATTAGTGTATCAGG    |
| 105 | cgd5_510  | TGCACAAGAATTACGTGGTAGG    | TCCTTCTATTACACTTTCGCGTG    |
| 105 | cgd5_520  | CGGTAGATGAAGGAATTAAGGG    | TGCACGAATTTGATTTGCTT       |
| 105 | cgd5_530  | CAAGAGAAGAAGAAGGAATGGG    | CTTGATTGTATCGTATGAGGAGGA   |
| 105 | cgd5_550  | TGAAGATGGAATGAAGATGGA     | TAAACAAAGAAGCCCAAAGCA      |
| 105 | cgd5_560  | GGGCTCAGAAAGTTAAAGGGAA    | TGTGTTTGTGTTTCCAGATTGT     |
| 105 | cgd5_580  | TGCCAAATACACTGGTAATGGA    | GCATGATTCTTTAATGGCTTCAC    |
| 105 | cgd5_600  | ATGAGCGATTGGTTACTCTGTG    | GAGCCATTCATTAACCTTCTCTTTG  |
| 105 | cgd5_610  | ATCAGTACCTTCCGATTCTCCA    | ATATACAGCCTCTCCAGCCAAA     |
| 105 | cgd5_640  | TTCCAAACATTCAGCCAAGA      | ACAGGAACAGGCACATATTTCA     |
| 106 | cgd5_650  | AGATGGAGAACGGACACTACAAA   | AATATGATGGTGTGATGAGAATGCC  |
| 106 | cgd5_660  | GAAATCGGTATAGAATCGCACC    | GCATAGTAATCTACCAGAATGGGAA  |
| 106 | cgd5_670  | GGAGTTAAAGTTGGCAGAATGG    | GGCATCGTAATCTTTGGACCT      |
| 106 | cgd5_680  | TAGGATGGTTCAGTTGCATGTT    | CTAATGATGGGTCACAATTCCA     |
| 106 | cgd5_690  | AAGGCGTTGGGTACAGTTCA      | TGCAAGCATTTTCAGTTATTTGG    |
| 106 | cgd5_700  | TCTCCTCAGATTGTTGATGGAA    | ATTATTTCGCGTTAGTATTGCC     |

|     |           |                            |                          |
|-----|-----------|----------------------------|--------------------------|
| 106 | cgd5_710  | ATTTGGAGGAGTGAATAACGGA     | AAATGGGACCTTAGTGAAGCAA   |
| 106 | cgd5_720  | TTTCTCATTCCGACTTACTCCC     | TAAATCCTGCCATTACATAA     |
| 106 | cgd5_730  | AGCCACCAACAATTATCAAACC     | GCCTCTTCTTCTCTCCATCTT    |
| 106 | cgd5_740  | AAAGGTCACTCAAAGGAAGGGT     | ATCCCAAAGATTGATAATGCGA   |
| 106 | cgd5_750  | AATTGATGGCACCGAGTTTATT     | GCAAATATCGGGAATGTGAGA    |
| 106 | cgd5_760  | GAATCTCAAGGATGTTTGCCTC     | CCTGTAAAGTCCGTCCATCTC    |
| 107 | cgd5_770  | GTGAAGATGGTGTATTGTGGG      | TCCTCGGTAATAACTGGAACCT   |
| 107 | cgd5_780  | TCAAGAAGGTGACAGAGCTGAA     | GGGAATGGTGAATAAAGAACA    |
| 107 | cgd5_790  | CAATGATCCCAAACAAGAGAA      | TGTGTTCCAAATATCTCCCAA    |
| 107 | cgd5_800  | ACTCAAGGGCGACTAGGAAAG      | ATTGGTCATTTATCACAACCA    |
| 107 | cgd5_810  | ATCTATGTCGATTCTTCCGCAC     | CATGGGAACTCCATAACCTGAC   |
| 107 | cgd5_820  | CGAATGGAAGAATGTCTCTGAA     | AGGCTTGGTAGCTCAATACCTG   |
| 107 | cgd5_830  | CTATTTGGTTTGGGAAAGACGA     | TGAGTGTGGGAATGAGACCTG    |
| 107 | cgd5_840  | AGAGCAAGAGGTGAAACTCCAA     | AAGCAAATCCCAAATTCCATC    |
| 107 | cgd5_870  | TGTGCGTGCTAAAGGATAATACA    | TGGGCTAGACTTTCAATTGCTT   |
| 107 | cgd5_880  | AATTGGAATGTAATGCTGATGAGTT  | ATAAATATCCGAGTCTCTCCTTGT |
| 107 | cgd5_890  | GCCGAATCTGAAACAAGTGAA      | GAAGCATTATCCAGCTCCTCAA   |
| 107 | cgd5_900  | AATTTGAGAGAGGGCTTTATTCC    | GATCTTCCCAGACAGTTCCAGT   |
| 108 | cgd5_910  | CATGGAACAACCTATAAGGCAA     | TGGTGCAGAATAACAATCCAAAG  |
| 108 | cgd5_930  | TTGGAAGAAGCGATTGAAGTGT     | TCGCGGTGTTTACATCCATAA    |
| 108 | cgd5_940  | AGTAAGAAGCAACCGACTTCCA     | CTTTGAAGCATTACCAGCCAA    |
| 108 | cgd5_950  | TAAGGGCGATCCAAATAAATC      | GATGTTCCCAAGAAATGTAGCC   |
| 108 | cgd5_960  | CTTGCACGAGAAGAAAGCAAC      | ATGAATATGATCCACCACCTCC   |
| 108 | cgd5_990  | TGGCAATAAGCCCTTTAACAAC     | GATCACGAATTGGATGGAAACT   |
| 108 | cgd5_1000 | CCCGGAACTATTGGATTAAGAA     | TGGGATACAGTCACAAGAAGGA   |
| 108 | cgd5_1010 | GCTGCAAACCAATCAATCTCTT     | CTGTTCTTGACCCATTCCATCT   |
| 108 | cgd5_1020 | ATATGCTTGACACTCAGCTCCC     | ACGTTGCTTGGTAAAGTCCAAA   |
| 108 | cgd5_1040 | TCATTTGCTGTATTCAATTTGCC    | CATTTCCACCAATATCCATCCT   |
| 108 | cgd5_1070 | TTCAAACATTAGCTATTCCCA      | TTGCTCGGTCTTTATTAGTTCGT  |
| 108 | cgd5_1090 | GTATTAGAAGTGGGAACGCGAA     | TATCCAAGTGGTCTTTCAACC    |
| 109 | cgd5_1100 | AGATGAAATTAGCCCACAGGAA     | TAAATGCAGGGTGTATGGTGTG   |
| 109 | cgd5_1120 | GGAAACAACGTACACTGGAACA     | AAGAATTGATGGGTCAGGAGAA   |
| 109 | cgd5_1130 | CTAGCAGTGACGAAACATGGAG     | ATATCCCAAATCCTGAATGCC    |
| 109 | cgd5_1140 | TTGATGTAAGAGATGTCGCAGAA    | TGGCTATGAAATTAGGAAGGGA   |
| 109 | cgd5_1160 | TAAACTGCGATGGTGTATGCT      | AGAAAGCGAGACTGTTGTACCC   |
| 109 | cgd5_1170 | GCTTCATACTGGGCTTTCTCTT     | TTGAGCCAATAGTGCCAGATAC   |
| 109 | cgd5_1180 | GTAAGAGGCCATTTGAAGCAAC     | TCTGCAATTCCCATAACAGTCAG  |
| 109 | cgd5_1190 | CTGGAATGAAAGAAGCTGAAGG     | TGACCTCGTAGTTAGGGTTGCT   |
| 109 | cgd5_1200 | ATCACAACAGATCGCATTGAAC     | TTTATCAACACCACCTTCTCC    |
| 109 | cgd5_1210 | CACTACAACAACAACCGCCA       | ATTCGTTTCTTAGTCGTTCA     |
| 109 | cgd5_1230 | TAGAAGGCTGGTCTGTGTTTCA     | TGAGGGAGTGTGCGTAGTAATGT  |
| 109 | cgd5_1240 | GCGGCATCAGAGGAATAATAAG     | GAACCATGTAATTGGGAACCAC   |
| 110 | cgd5_1250 | ACTTTGAGCAAGCCTATCGTTC     | ATAACGGGTTCCAATAAAGCA    |
| 110 | cgd5_1260 | TCAAATGCTCGTTAAATCAATCC    | CCAAGTTAGTATTCCGCTCCAA   |
| 110 | cgd5_1270 | GTTTCAGTTGTCGCGTTATTCA     | TCAAAGCCAAAGAACCATAGAAA  |
| 110 | cgd5_1280 | AGCAACAAGCAAAGAATCCAAG     | CGTGCGAGATTATAGAGGCATT   |
| 110 | cgd5_1320 | CAATCCACAGCTAATCCCAA       | TATCCGCCAATATCCAATCTTC   |
| 110 | cgd5_1340 | ATTCAGATTCCGCTTATTTCCC     | TTACAGCAACAGTCGAGACGAG   |
| 110 | cgd5_1350 | ATCGGGTCTTCTTACGACATT      | AATCTTTCTGCGAGCTTCCATT   |
| 110 | cgd5_1360 | AATTGTGTTTGCATTCTGG        | TTGGTGGACAAAGGTGTTGA     |
| 110 | cgd5_1370 | ATTAGTTCGCTTCCATCCATAAA    | AATATAGTTCGGCACAGTTGAGA  |
| 110 | cgd5_1380 | GGAAATAATCACATCACATGACAGAA | TATTGAAACCCTTCCAAGCA     |
| 110 | cgd5_1410 | ACCAGTATATCTTTCTTGGGTGAATG | TGAAGGCAAAGTTGGGTTAATG   |
| 110 | cgd5_1430 | AAACCTCAATGGCAACGTACTC     | TTACCCATGTATCCTCATGTCC   |
| 111 | cgd5_1440 | ATAACAAGGAGCAACAGGCATT     | TCTAATTCTCCGATTCTCAACCA  |
| 111 | cgd5_1450 | CCAAACATTCTTGATAGTCGCA     | ACGTTCAATCGTTTCTTGGTTT   |
| 111 | cgd5_1460 | ATTCCAAATAGCGACCAAGAAA     | TCTGGATGAGTATCAACTGGGA   |
| 111 | cgd5_1480 | CATTAACCAAGTCTCACACC       | GTAATCAAGTGCAAGTGCGTC    |
| 111 | cgd5_1490 | CCCAGTGAAATATGGGTAAATGA    | TTTGCCATTCTGGTAGCTCTCT   |

|     |           |                           |                            |
|-----|-----------|---------------------------|----------------------------|
| 111 | cgd5_1500 | TGCTTATGACGCTATGGATTGA    | GCTAATTGAACCAGATACAGCGA    |
| 111 | cgd5_1580 | TCGGCTATATTGAAACACCAAA    | AGTAAATGCCTTACGCTTGCTC     |
| 111 | cgd5_1590 | CCCTACAAATCACGAAAGCAG     | GGCCTTAGTACCAGCTAATGGA     |
| 111 | cgd5_1600 | TAAACAGCCTTCGAGTTGCC      | GCCATATTCGTGTAGGAGTTCATT   |
| 111 | cgd5_1610 | CCCGGAAATTAAGTGTCTTGTT    | AATGTTGTCATTGTTGCTCACC     |
| 111 | cgd5_1620 | AAGCATTACCCGAGACATAGGA    | AATTAGGCTCGTTTACAGGCATT    |
| 111 | cgd5_1630 | TGTGTTTATTATTCCTGCGTGG    | TCCTACAATCCCGAAAGAGAG      |
| 112 | cgd5_1640 | ATGAAGGTGAGTATTCCAACGG    | ATGACCACACTTAACGCCTCTT     |
| 112 | cgd5_1650 | TGAACGAACTTAATAGGCCAGAC   | TTTCCACTCCACACAACATTTT     |
| 112 | cgd5_1660 | TAGGCTGCAAAGATGGTAAAGG    | TAAGTTCATTTGGGATTGTCGG     |
| 112 | cgd5_1670 | TATCTCCAACGGACCAAACAG     | CCATAAGGATATGCAACAAATGG    |
| 112 | cgd5_1680 | ATCGCATCAATAGTTCGTCTT     | ACCGTACTGGCACAAATCATC      |
| 112 | cgd5_1690 | AGGACTATCCGCCTCTATCTCC    | TCTTGCCACTCAGGAATTAACA     |
| 112 | cgd5_1710 | ATCAGGCCGTATTAAGTCACCA    | TCCTTTACCTAGTCCGCTCAA      |
| 112 | cgd5_1720 | TGATCCTGCTACTTCGGCTACT    | TCCCTTCGTGATTTGTCCATT      |
| 112 | cgd5_1730 | GCACACCTGATAGAAATAACGG    | ATGATACTTGCTGCGTCCATAA     |
| 112 | cgd5_1750 | GAATACATGGTGAGTGCGATGA    | CTTGCGAATTTGATGTCTCCTT     |
| 112 | cgd5_1760 | TAAGTGAATTGGGAGAGGTGCT    | ATAGGTGTTGATAGGGCCAAGA     |
| 112 | cgd5_1770 | GTGACCCTATTTTATTGTGCTTAGA | GCAAGAGGAACTTTGGGAGG       |
| 113 | cgd5_1780 | CAGATATTCATGGCGCAACTAC    | GCATATACTCATTGTCTCCT       |
| 113 | cgd5_1800 | TCAAAGTCAGTCAACTCATCACAA  | AGCGTTATAGCTCAGGTCACAAG    |
| 113 | cgd5_1810 | ACAAGATTGAGGATGAAACTGAAA  | GTCGAAATAATCCCTTAAACCAAA   |
| 113 | cgd5_1820 | TGATAATTGATAGGCACGTTGG    | CGGAGAAATCCAATGCTAAATC     |
| 113 | cgd5_1850 | GTGCGACCTTACAAGCCAAC      | TCCCAAATAAGTGCTACCGATACT   |
| 113 | cgd5_1860 | GCCAGATCAATAAGTTCATATCA   | CCAAAGAAGGTAATTCAGAGCC     |
| 113 | cgd5_1870 | CAATCTCAAGAGTTATGGGCGT    | GTCCATTTGATCTGTTCCATCC     |
| 113 | cgd5_1880 | CACGAGGTGCAAGATATGAGAA    | TGGTGAAGTATCAAGCCATCAA     |
| 113 | cgd5_1890 | TCCTGGGAACTCGTTATTTCA     | AGCTTGTGGATTTATTTGCGTT     |
| 113 | cgd5_1900 | ATTTGAAGTTTGTGCGCGTATC    | GCCTCTCTTCTGTCATCAATCC     |
| 113 | cgd5_1910 | GTGCCATTATTCTCATCAAGCC    | CCTCTTCCCATTCTATTTCTCTTACA |
| 113 | cgd5_1920 | GGTCTGTTATTGAGCCTGGAAC    | AATCTGAAAGCCCAGAAATTGA     |
| 114 | cgd5_1930 | AACTAATGCTAGAAGGGCGATG    | GTTATGAATGTCGCAAACAACC     |
| 114 | cgd5_1940 | GGCTTCAAACAACTACCTCCA     | GAACCAACCAGTAAACCAGGAA     |
| 114 | cgd5_1950 | GCTGCTTCCTTGCTAAATG       | GCATCGCTTAAATTGCTCGT       |
| 114 | cgd5_1960 | CTCGACTTGATTACAGAGGCAA    | AAATGTTCTTCCACATCTCCGT     |
| 114 | cgd5_1970 | GAAGCCCACAGATTTCCATTAG    | AATACGAACCATCTTCTACGCC     |
| 114 | cgd5_1980 | GGGTGAAGACCTAAGTACCAAAGA  | ACGTTTGCGAGATGTGATAGTG     |
| 114 | cgd5_1990 | TTGGATGGAACACATTAAGACA    | TTGAATCCGACAACCTGAAGAAA    |
| 114 | cgd5_2010 | CAAGAAGTAGCGAAGGAAATGG    | CGCATCATAGCAGGATCAATAA     |
| 114 | cgd5_2020 | AAAGTTGGTGGGATGAAAGAGA    | AAGGAATATAGCCGAGGTTTCC     |
| 114 | cgd5_2040 | ACTGCGACCTATCCCATCAC      | AAATTCTATCCCACGTCCACC      |
| 114 | cgd5_2050 | GAGTCCATTTGCATTACCAACA    | GTTTCTGCTTTACCCTCGTC       |
| 114 | cgd5_2060 | GCCAATATAGAGAAGGAGGCAA    | CATATAACCGTACTCGGCATCA     |
| 115 | cgd5_2070 | TCTGGAAGAGCAGGAAGAAGAG    | CAAACAGCATAAACGTCCTCAA     |
| 115 | cgd5_2090 | GGTGGCGGATAAAGAAGTTACA    | TTCTCGTGCAAATAAGAGTCCA     |
| 115 | cgd5_2100 | AGGTCGTGGTGGTCTCTTT       | GCAGTTTGAATCTTTGATGTTCT    |
| 115 | cgd5_2110 | AGTAAACAGCAGCCAAAGTCATC   | ATCGCTAAACAAGCCATCATCT     |
| 115 | cgd5_2120 | TGATGAAGTTGTTTATTCTGGCTT  | AGTGAGTTGGCTGGAATCTTG      |
| 115 | cgd5_2130 | AGGAGGAGTACATTGGATTTGG    | AACAGGAATCTGCTGAGGAAGT     |
| 115 | cgd5_2140 | CCTATATGCAGAAACCCAAACC    | TTAGAGCCGCAGTTGAATACTTT    |
| 115 | cgd5_2150 | CTGGCACTTGTTTCATCTCATTC   | AAATGGCAAACACAATTAACCTC    |
| 115 | cgd5_2190 | AGATGTTCCGTTGATTTGGAGT    | AGATTGGGCCGTTTCTGTATT      |
| 115 | cgd5_2200 | GCAATATGGAGAGCTTGAGGAG    | TAAGGTGGTGTGGTTGTTGAAG     |
| 115 | cgd5_2210 | GAGAGCTGTTTCTATCCGCAA     | TTATGCAACCAAAGTAGAGGCA     |
| 115 | cgd5_2230 | ACAATCTGCAACTGGATCAACA    | AGGAACAGCAACAATCCAAAG      |
| 116 | cgd5_2240 | TTCTTGGATTTGTGGATGATGT    | CACCTGTCTGAAATAAAGGCAA     |
| 116 | cgd5_2250 | ATGGTTCTTTGGTAAGCACTCC    | TCCTCCTTCTCTAATTCATCC      |
| 116 | cgd5_2280 | TAGAAGCAGGAAGGCAATCAA     | AGATACTGGGCTCGATAAAGGAC    |
| 116 | cgd5_2300 | AGTCCAAAGGTTCCAGCATCA     | AACACTCCGCCAATCAGAGAG      |

|               |                            |                           |
|---------------|----------------------------|---------------------------|
| 116 cgd5_2310 | CTCCATTCCAAAGATGGTCTC      | ACCCTGCAACACCTTGTCTATT    |
| 116 cgd5_2320 | CGAGTTGTTGTATCTCTAACGGG    | TCGTGATCCAGCCCTATATTTTC   |
| 116 cgd5_2330 | GTAGGACGCCCAAAGTACAAGA     | GGTCCAGAGAGCTTCCATATCA    |
| 116 cgd5_2340 | GAAGAAATCAATCAGCCAGACC     | TCCGAGGTGTTATCTCCACTTT    |
| 116 cgd5_2350 | ATGGAGAGAGATGCCCGTACTT     | TGCCATAGAACCCTTTCTTTTC    |
| 116 cgd5_2360 | CAGAATCCGAGTTACATTACAA     | TCAGGTTGTTTGCTATTGCTTC    |
| 116 cgd5_2370 | GCTCAGGCTTTGTCCACTACTAA    | TCACCTTCTTCTTCTCCTCTTC    |
| 116 cgd5_2380 | AGATTGGCCTCCACCAGATAC      | TCTTTGGGTCTTAAATCATGGG    |
| 117 cgd5_2390 | GCAAGAATATCTCAAGCCAGGA     | GGGTGAGTCCTTTGGTCAATAA    |
| 117 cgd5_2400 | TTGGAACAATTAACATGGGCTT     | TCCCTGAATCCTCAAACATCTC    |
| 117 cgd5_2410 | AATTTGTCATTATTGGGATGGTTT   | TTGATTTATTGGAACCTGTGGA    |
| 117 cgd5_2420 | CTCCAGGTTCAAAGACAAATCC     | TTTAGAATCCGTTGTTCCGTT     |
| 117 cgd5_2430 | TGATGTTGAGAATGTATTGGTTGA   | GTTGTTGGGCCTTGATTTGT      |
| 117 cgd5_2440 | CAACTGAAGATATGCTGATTGGA    | AACGGTAGTAAGTGGAGCAAGG    |
| 117 cgd5_2460 | TACTTCCCTGATGGTACTCCGT     | AGGATGTTTGGTTGAAGCTGTT    |
| 117 cgd5_2470 | CTCAATTTCCCTCAATCATCGT     | AAGAGATCCACTTCCAGTTCCA    |
| 117 cgd5_2480 | GTGTTTGGCTGCTTATACTCCC     | GGTTTCTTCTGATGCTCTT       |
| 117 cgd5_2490 | TTCTTCCACATCTCAAATCCAA     | ACAGAGCAAGTAATGGCAAGG     |
| 117 cgd5_2500 | GGAATATGGGTGGAAGTCAAAG     | CACATCAAACGAAGAATGAGGA    |
| 117 cgd5_2510 | TATTAAGGAGCTTACCACCC       | AATCCTGTCTTGTCTCATCCAG    |
| 118 cgd5_2530 | ATTTGGTTACGCATGTCCTCTT     | CCTGCCTTTGAGAAATAGTTGG    |
| 118 cgd5_2540 | GGGATTAGCTCGATTTCTGATG     | AATCTTGCCATCTTGACCTGTT    |
| 118 cgd5_2560 | GAGCTGTATATTTCGGGATTGG     | GCTGTCTCTATTGCCTGTTTGA    |
| 118 cgd5_2570 | AGGAGAGCAACGATGACTTGA      | TGATGATGATGCGGTAGAAGAC    |
| 118 cgd5_2580 | CATTTACTGCCTGAATGTGCTT     | CTTCCCATGTGTTGGTCATAG     |
| 118 cgd5_2590 | TGGGTTTAAAGCTCTTCTCAAGG    | TGGACTTCTTCCAATCAACACT    |
| 118 cgd5_2600 | AGCCAAAGAAACCAACAAAGAA     | GAAACAGATTGAGCATCCAGAAC   |
| 118 cgd5_2610 | ATTGCTTGAGAGTGAGAGAGGG     | TTTCCAAGTGTTGATGATAAGGA   |
| 118 cgd5_2640 | CGTCCCAAATACTAAGCTCCAC     | TCCAGTTTCCATTTCCAGAGTT    |
| 118 cgd5_2650 | ATCTCTGGTATTGCGATCCTTT     | AGCTTATGCCATTATATCTGTGA   |
| 118 cgd5_2660 | TTCTATTGCCAGACCCACCTAC     | AAAGATGATGCGGAGAAATCAG    |
| 118 cgd5_2670 | TGTCAAGTTTGGTGTGAGCTTC     | TTTCAAGTGCTTCTGGATCGT     |
| 119 cgd5_2680 | ATGGATCGCTGGATTTATTGTC     | TGACGTGAATATCGCTGAATGT    |
| 119 cgd5_2690 | AAGCAGAAGCAACTGAAGGAAA     | CATCCAAAGGCTCATATCCACT    |
| 119 cgd5_2730 | AGCAATGATGAATGGAAGAAGAA    | CTAAGTCGTGATTCTGGAAGGG    |
| 119 cgd5_2740 | GTAACAAGGCGAAATAAGGAGGT    | CAACGTCTCAAATCCAATACA     |
| 119 cgd5_2760 | AGGCAATAAAGGAGGCAGAGTT     | CATCAATTTCTTCTGGTTGGCT    |
| 119 cgd5_2770 | CCTACTCGGGCTATGCTACTTG     | ATTCTACCGCCATTCTCCATC     |
| 119 cgd5_2790 | TACTTGCTTCTTTGGGAGGAAA     | AGATCAGGTCGTTGTATTGGGT    |
| 119 cgd5_2810 | ATAGATTATTAGGCGGGCAA       | TGAGCCATTATTCTGTTGTGGA    |
| 119 cgd5_2820 | CGCCACAATTACTCCAACAAG      | ATCCCAACCTGTACTGAAAGCA    |
| 119 cgd5_2840 | AAGTATCACGGGCCAAACAC       | TTCCATCTTCTCCTTCACTTCC    |
| 119 cgd5_2850 | TTGGACTGGATATGGAATGAA      | TCCCTCAATAACTTGGACTCTTG   |
| 119 cgd5_2860 | ATGTGATGAACCTTCGAGAATAGA   | TATCTTCTGCTTACCCTTT       |
| 120 cgd5_2870 | TGCCCTTTCTATCTCTCAAACC     | TTGAAATTGTTGCGCATATCTTTGT |
| 120 cgd5_2880 | TTGGACTAGGGTTAGGACAAGG     | TCTCAATTCACCTTCTGCTTCA    |
| 120 cgd5_2890 | TGGGAGAAATCCAACAAACC       | TGTAACCATCAGGAACCTCAA     |
| 120 cgd5_2920 | GATGGTGTAGATGGATGTGGA      | TGTGATATTAAGCTCGTAGGGAGA  |
| 120 cgd5_2940 | ATTGTAATTCTGCAAACGGGAC     | TCGTTATCATCATCTTCTCTCCA   |
| 120 cgd5_2950 | TGATCCAAATTATGACCCATCAG    | AATCTGTTGCGATTCTTCCAAA    |
| 120 cgd5_2960 | ATACTTGGTCAGGCACCTTCA      | CATAACACCCGTAGTCTCCTCA    |
| 120 cgd5_2970 | GGGCTATTGCTGATAAATGGTT     | CATCCTCCTCAAATACACCTCA    |
| 120 cgd5_2980 | AATGAAGATGATAATGAAGGAGATGA | TGTAATTGAGGAACCATCGAAA    |
| 120 cgd5_3010 | TTTCATTAACACCATCTGACCAA    | AGGAGGAACACAAACAGGAGAG    |
| 120 cgd5_3020 | AGACCCTGATGAGAAGAAGCC      | TATTGTTTCTGCTTCTGTGAA     |
| 120 cgd5_3080 | GGAAGATATGATTTGGTTATTCCAG  | CAAGAGATTGAGGAAAGATGAC    |
| 121 cgd5_3090 | GATTCAAATGACCCAAACAAGTC    | TCTTTGCTAACCCAAATCCTCT    |
| 121 cgd5_3130 | AAGGGAAGAAATGACCAACTCA     | CCTCTCACCTCTGAATACCCAC    |
| 121 cgd5_3140 | CCACGAGGTTTATCTATTACA      | TACCTTTGTTAGCCCATCTTCC    |



|     |           |                            |                             |
|-----|-----------|----------------------------|-----------------------------|
| 121 | cgd5_3190 | CCAAGTGAATCTGAAATCACCA     | TTGAAAGAACTTACCTCCCTTACTACA |
| 121 | cgd5_3200 | CTTCTCGCTGCTTGTATGTCTG     | GCCTTGGTTTCTTCTTCATTTCT     |
| 121 | cgd5_3230 | AGGTTGGATTTGGGTAGTTATTGA   | AGCATGTTCCCATACATCACAG      |
| 121 | cgd5_3300 | GACAAAGATCCACTTCTTCGGT     | GATGGGTTGAGGTCCAGTAGAG      |
| 121 | cgd5_3310 | GAGTTGGGCCTTCACAAATAAC     | TCTGTTTCCAAGATGTGGATTCT     |
| 121 | cgd5_3330 | CCATCTGCTAGAATGTCGGTTT     | AGTTATCCCAAGGTCTCCATCC      |
| 121 | cgd5_3360 | GAATCAGGGAACCTTTGTTGGAG    | GAATTGTTCTTGAAATCCGTC       |
| 121 | cgd5_3370 | CAGAGATCCCAACTTCACCTT      | TATTGCCAGAAACGCTATTTGA      |
| 121 | cgd5_3390 | TAAATGAACAAGATGCGAGGAA     | TGTAGCCATAAATCTCCGTC        |
| 122 | cgd5_3410 | TTGCAGGTAATGTGAAGCAACT     | AGAGAATACCATAAGGCACCCA      |
| 122 | cgd5_3470 | AGAAGCTCAAGCCTATCCAGAA     | TTCTCCAACCTTTCACAACTACC     |
| 122 | cgd5_3500 | TTGTGGTTCAATTCCTCTTGG      | CAAATGGTGAGACAGTTGTGAAA     |
| 122 | cgd5_3510 | CTTGAGAAGGATGCAAGTGGTT     | TCTACGGACAATAAGGCTCTGG      |
| 122 | cgd5_3520 | CCAATGAGTATTAGGGAGGCTTACA  | TCCATTATCTGGGTGGTTCCTT      |
| 122 | cgd5_3540 | GAAATAGAGAAAGCAGGGAGCA     | TTCTTTGAACTGCCATCAGAAA      |
| 122 | cgd5_3550 | ATAACCCACCAGTTCGCTT        | CATTGCTTGGGAAGAGTTGTTT      |
| 122 | cgd5_3560 | AAGTTCATTCCAATCAAGGG       | TTCTTGGTGAGGAGAAATACGG      |
| 122 | cgd5_3570 | CTCTAAATGCCGAATGTGCTAA     | GCAACAGCTTCAACACCTCTAA      |
| 122 | cgd5_3590 | ATGAAATTGCTTCTTCGTTGG      | TGAATCCTCTCCATCTTTCCTG      |
| 122 | cgd5_3620 | CAGGAAAGTCAACATCAGCAGT     | TTTGAAGGAACATAAGCAACCA      |
| 122 | cgd5_3630 | ATGGCACCTCAAGTTTCTCATC     | GTATCTATCGCACACAACGTCAA     |
| 123 | cgd5_3640 | AGACTTAACAATAGGCGATACGAAGT | GCACCTCTAGCAATACTCCACC      |
| 123 | cgd5_3650 | TGCAACAATGCCAGATAAGAAC     | TTTGCTCTAGCTTACCGACCA       |
| 123 | cgd5_3700 | GACGACCCAAGTAGTGGAAAGA     | TGCTAAGTTTGTGCCATTTGA       |
| 123 | cgd5_3730 | TTGTGTGATGAAGAATTTGGAGA    | CAGCAAGATGAAGAGGAGTTTG      |
| 123 | cgd5_3740 | GCTGAGTCTTGTGAGGAGGATT     | TCCAACAACCTTACGTGGATTAC     |
| 123 | cgd5_3750 | TTTCAATAGGAGATTGCGTTCA     | ATGGCGGAATTAAGTATTTGG       |
| 123 | cgd5_3780 | ATCGGAGAATATAAAGGGAGGG     | ATGGGATTGGACTATGTCTTGG      |
| 123 | cgd5_3790 | TGGTCACTCAGGAAAGAGAGAA     | AGCACTTGCAGATAATGCAGAC      |
| 123 | cgd5_3810 | AAATGGTATTGCTAATGAAGTATTGT | TTTGGTGCTTTAGGAGGACTTT      |
| 123 | cgd5_3850 | TCAAGCATCATCTCCATCAGTT     | GGGTTAAGAATTTGACTTCGGTT     |
| 123 | cgd5_3870 | GGGACGAGAACTAACTACTGCC     | TGGCTTTAATTGCATCACTCTG      |
| 123 | cgd5_3920 | GAATGGAGATGGAACATTGGA      | AGCCTCTTCTGATGTAAGTGGG      |
| 124 | cgd5_3940 | TTCATCAGACTCAGCTTCTTGG     | CTTATACCATCATAAACCCCTTTCATT |
| 124 | cgd5_3950 | TAGGAACTCCAATCCTGCAAC      | CATCCTCTTCTCCTGTCATTACCT    |
| 124 | cgd5_3960 | GGACATGCTAACACTGAATGGA     | TTATCACTATCAACCCACCCAAC     |
| 124 | cgd5_3970 | TCCTTGGGTTAATTCTTGCTTT     | TGCAATGGATCTTCTCTTCATC      |
| 124 | cgd5_3980 | AACATCAGGTGGAATCCTTTG      | AATGCCCTGTAATATCATCCCTT     |
| 124 | cgd5_3990 | TCATCATCAGACTCGACAGTTTCT   | CTAACATACACCTCCATGCC        |
| 124 | cgd5_4010 | TTTCAAGATTACTTTCTTCTTCTCC  | TGTATTCACCATTTCTGGAGTTTC    |
| 124 | cgd5_4040 | AATGGTTGGTGGTGATACTCCT     | CCTGTAGTTCTTTGCTTTGCTTC     |
| 124 | cgd5_4060 | AACACACGAATAACATGAAACAAA   | TTAGCATTACCGCTTCTCCT        |
| 124 | cgd5_4070 | ATTACCTACCTCTTGGCGCTTT     | TAAATCACACATTGGACCCTCA      |
| 124 | cgd5_4080 | GGAAATACATCATTTGGAAGAACAA  | CCTGGAGATGAAACCGAATCT       |
| 124 | cgd5_4100 | TTCCACAAGAGTGTATCCGT       | TTCAAATCCTCCTCCAATACCTAA    |
| 125 | cgd5_4110 | TTCACAAGGCAATATAAGTCTCCA   | TCAAGCTCTTACCAAGTTCATT      |
| 125 | cgd5_4130 | ATATAGCAAATGGTCAAACACCC    | GCAGAGCCTGTTCTCTTTCTTT      |
| 125 | cgd5_4150 | CTGCAAGAACAAGGCTCAGTAA     | CATCTGGACACTGGAAAGACAA      |
| 125 | cgd5_4170 | ATACAAATATGGAGGGAGGCAA     | CCGCTTGGTGTATAAACTCT        |
| 125 | cgd5_4210 | AACAGAGATGGTGGTTCAGGAG     | TGTTGGATCAGTGCCTTGT         |
| 125 | cgd5_4220 | GGTTTAGTATCTGGATTAGGGCAA   | CCTCCTCTTTGAGTTTGATTATTAGG  |
| 125 | cgd5_4230 | GATGATGTTGCTCAGAATCCAA     | TGGTGCCATAATAAATCCAA        |
| 125 | cgd5_4240 | TGATGTTGCATGGTTTATCATTGT   | CCCAACTTTCTGCTCTTTCCA       |
| 125 | cgd5_4250 | AACCACAGCTTCTACTGCTCCT     | TATTGCTACAAACACCAGCCAC      |
| 125 | cgd5_4260 | TGTTATCAGTTAGTGGCTGGGA     | TCATTTCTCAGTGGAACTTGTG      |
| 125 | cgd5_4280 | GCGAGCTACTTCTGAAACAA       | GTGTCTTTGCACAATTTCCAGT      |
| 125 | cgd5_4290 | TGAAGAAGAGGAAGGAGGATATGA   | TCGCATCTACCAAGAACTCC        |
| 126 | cgd5_4300 | AAGTCCACCATCCACTAAGCAG     | AGCATCATCATCCGAAGCTATT      |
| 126 | cgd5_4320 | AAGTTTGTCTCCTCATTAGCACA    | GAAGGTCAATATCGGAAAGCAA      |

|     |           |                             |                            |
|-----|-----------|-----------------------------|----------------------------|
| 126 | cgd5_4330 | AGGATGTGAGGTACAATCTGGG      | TTGTCGGAAAGTTCTTCTTCTTG    |
| 126 | cgd5_4350 | TCCTTCTTCAGAGCCTTCTCC       | GCTGGTAATGTTTGGAGGTATCA    |
| 126 | cgd5_4360 | CTTGCCTAACTTCAGCCTTGTT      | TCCTGGCTTGGGATAGTCTTAC     |
| 126 | cgd5_4370 | CGTGTATATGCTTGGAGCTTTG      | GCCATTTGTTTTGGAAGTAGTC     |
| 126 | cgd5_4400 | CATTGGATTTGGAGTTATTCAAGG    | GCTCTAGCAACACCTTCGTC       |
| 126 | cgd5_4420 | CATTGTTTGCATCCTCCTT         | TTTCCTGTAGATGGATGAGTATTTGA |
| 126 | cgd5_4430 | TTTGGAACTCAATACCCTGATAAA    | ACCATAAGCATCACCAGTAGCA     |
| 126 | cgd5_4440 | TCAACTACCAAGAAAGAGGAATGA    | ATCAGGAGTGAATGTGTGTGCT     |
| 126 | cgd5_4470 | TTATGCCAAGTATGAATGGTGG      | CTTGTTCTGGTTGTTGATCCTG     |
| 126 | cgd5_4480 | CGAGTATGAAGAGCGAGAAGGT      | TGGGAGGAATTGTATTTGAAGG     |
| 127 | cgd5_4490 | AAACCAGACCCAATACCGAAC       | AATAGCATCCTCAAAGGCATTATC   |
| 127 | cgd6_10   | GCCTCGAAGTTGTTATCGTTCT      | TGTAGAGAGACATCCCACAGGTT    |
| 127 | cgd6_20   | TAATTGAGAATGGTGCAGATGG      | AATTGCAGTGATTTGAGGAACA     |
| 127 | cgd6_30   | TGCGGTGATATTCTTTATTTAGTTGA  | AGCTTTACCAGCTCTTCCCAC      |
| 127 | cgd6_40   | GGTGAAGAAGAAGAGCAACCAG      | ACCAGAAGTACCGAGAGATGGA     |
| 127 | cgd6_50   | AGACATTCCTCCTCCACCTTCT      | GCTTTGCTTAATTGTCGGATGT     |
| 127 | cgd6_60   | GTAATGGAAGGCTGGACAAGAG      | TGATGAAGATGACCCTGAAGAA     |
| 127 | cgd6_70   | TATAGGGCATGAAATAGGCCAC      | TGGATCTAAAGAGAAAACCAATGAC  |
| 127 | cgd6_80   | ACAAATCGCCACAGAGTGAGTT      | ACAGGGCAATCAGTTGTCTCTC     |
| 127 | cgd6_90   | CATGGTTCTTTACGGGAATTGT      | AGACCAACAGAAAGGGATGAAA     |
| 127 | cgd6_100  | AATTTGTGTAGGAGCCCAGGA       | GGATTCTCAATTTCAATAGCCTCA   |
| 127 | cgd6_110  | GCAGTAAAGACGAAATCCCAA       | ATATCAGGCTTCTGACCCTCCT     |
| 128 | cgd6_120  | TCCAAAGTGCAATGTTCCATC       | CTTAATGCTGAGTTCGTGCTTG     |
| 128 | cgd6_130  | GCTTCCGATATGCCTTTATGAG      | CAGTAGCCGAAAGAATTGAACTG    |
| 128 | cgd6_140  | GGGAGTACGAATTGTTGAGAGG      | GCTAGAAGTAGAGCTGACGGGA     |
| 128 | cgd6_150  | TCAATGGATTTGGAAAGAAACA      | AACCCGTTAATACTGATGAGCC     |
| 128 | cgd6_160  | CAATCCAGAACTCATCCAATTTT     | GGCCTGAAAGGATATGTCAAAG     |
| 128 | cgd6_180  | TGACTTAGACGATGAAGAACCTGA    | CGCCAATTAAGTATCAAAGGG      |
| 128 | cgd6_190  | AATGCAAATAATAAAGATTTGGCTAC  | AAGAGCAAGATGGACATGGATT     |
| 128 | cgd6_200  | TCATCAACAACAAGCAGTTTCA      | TTATCTCCTCTCTAGCAACGCA     |
| 128 | cgd6_210  | GCAACCTATTGTAGCAGACCAAC     | CTCCTCCACCTCTATGTGAACC     |
| 128 | cgd6_230  | TTGAACCAACCAGCAAAGAA        | ACTTGAAACCTGCATTTCCC       |
| 128 | cgd6_240  | GAGGAGATTATGAGCCAAAGGA      | TTCTGATGATGGTTGAGGTAA      |
| 128 | cgd6_400  | ACCAATTCCAGGTCATCCAA        | ATATTGTTTGGCGGTAATCCAG     |
| 129 | cgd6_410  | TAACCAGATTGGATTGGATGAA      | CTCCTGAATTTGTTGGTCTCTG     |
| 129 | cgd6_480  | AAGACGGTAAGTGTAACCAACAAA    | CATCTTCAACAACCAATAACCTG    |
| 129 | cgd6_490  | GTTATCTTTGTTGGTGGTATTGGAG   | GCTTCTGGTATAAGGTGGCAAA     |
| 129 | cgd6_500  | ATGTTGGGAGAAATTGATGAGAA     | GATGACCATTTAGCACATATTGGA   |
| 129 | cgd6_520  | CTCTTCAATGGCTTCATGCTAA      | GGTGCAACATATCCTGGTGA       |
| 129 | cgd6_530  | CAATTCAGGTCCAGGTTTAGG       | AAATCCGCTTATTGGCTCTATTC    |
| 129 | cgd6_540  | TTCCTAAATCTCCATCAAGACCA     | GCCTTTAATTGTTCCATTTCCA     |
| 129 | cgd6_560  | GAAATACCCTGAAGCTCCCATT      | GATCTGTTCTCCACATTTACCA     |
| 129 | cgd6_570  | TGTTAATCCAAAGGGAGAAATGA     | AATAGAAGGAGCAGCAGCAGAG     |
| 129 | cgd6_580  | TTCAAGTTCGTCTTCAACATCATC    | GCATCCATAATCGTCTTTTGT      |
| 129 | cgd6_610  | TCTTGGTAGAGTCGTTGATGCT      | CCAACAATAGCTTCTCTTTGTCC    |
| 129 | cgd6_620  | AAAGATCCAAGCAGTGGTACAATAAG  | CGGTGCATAATACCTTGTGAATG    |
| 130 | cgd6_640  | CAAACCTGGATCAAATATACTCACACC | TTGCTAGAATCAACATGAACACAA   |
| 130 | cgd6_670  | AAGGTTTGGATTCATTTCCCTC      | ACATTCCATTTCCATCAGCATT     |
| 130 | cgd6_680  | ACGAACTTGACGCTCATTCTTT      | AAATGTTGTGCCATTGATGATTT    |
| 130 | cgd6_690  | AGAAAGCAGAATGGGCAACTAA      | GTGAGTCCAGGCATAAGTCCA      |
| 130 | cgd6_710  | GCAACTGCTGAACATCAAGATAA     | GCTCAGATTTACCAAAGAATGGA    |
| 130 | cgd6_720  | AGTATCGGGATCAAGGCAAGT       | TTCCATAGGATCTCCAACCAAG     |
| 130 | cgd6_740  | GAACCAAACACAAGAAATTACAACC   | TTCTGCATTGAGTGAGGCATAG     |
| 130 | cgd6_760  | CGGCTCCAAATTCTATTCAAAC      | CTAATCCAGAAATGGCTCCTTG     |
| 130 | cgd6_770  | TGGAAACGTAGTTGGTAATGGA      | ATTTCAAGGTTGATTGAGGTGT     |
| 130 | cgd6_780  | TAATTCGGATGTGGAGTGTTTG      | CTCTTGTCTGATTGTAAGCCC      |
| 130 | cgd6_800  | ACTCGCTTATGCACCAATCC        | ATACTACCACCGGCAGAGAAGA     |
| 130 | cgd6_820  | GGTGGTAAGAATTGGATAACTGCT    | CTTGACCTCATTGCTCTAAGTTATT  |
| 131 | cgd6_840  | CCAAGCAATCTCTCATTTC         | AACGTCTGTTCCAAATACCCAA     |

|     |           |                            |                             |
|-----|-----------|----------------------------|-----------------------------|
| 131 | cgd6_870  | CTTGCCATGTATGTAGCAGTATGA   | AGAAGAGTATCATTAAAGCAATTTCCC |
| 131 | cgd6_890  | ATGCTTTCAACTCCTCCACAG      | TCCACTAAATCTGTCTGAGTCCC     |
| 131 | cgd6_900  | AAAGGGTAAATAATCCAACCTCGTCT | TTGGGAAAGAAATATGGGAAACT     |
| 131 | cgd6_910  | AGTGAAGATCAAGAATCAACCGA    | GCGAGTTTATCACCATACTGCTT     |
| 131 | cgd6_920  | TGCATTATTGAGCGATTCAATT     | TCTGTTTCATCAAGTCCACCAAC     |
| 131 | cgd6_930  | CCAGAGTTTGTAAAGTTGCTCCA    | TCTCATAAGTCCATCCCATTCTCT    |
| 131 | cgd6_940  | TGGTGGTAAAGTTGGATGGG       | GGCCATAAGGACGTGTAGGTAA      |
| 131 | cgd6_950  | CACCTGAACATCCTATTCCAGTC    | ATTGCTGTTGGCTTAATGGTTT      |
| 131 | cgd6_960  | TCCTTCATTCTGGTCATCTTCA     | AAGCATCCTAATGTGTCTGGGT      |
| 131 | cgd6_970  | AGAAGGCAGAGAGGGATGAGT      | GTTTCAGATTCGATAATGATATTGCT  |
| 131 | cgd6_980  | TCGTTTCTATGAAGCTAACCCAG    | AAAGTTCAGGCATGGTGCTAA       |
| 132 | cgd6_990  | ATGTCGGCAGTTGGTATGTCT      | TCTGGTGGCGTATTAACCTTATC     |
| 132 | cgd6_1010 | AAAGCGGAGTAGGGAAAGTTGT     | AAATTCGGTAATCTGGTGTGG       |
| 132 | cgd6_1020 | ATGCAACTGGTGGTCATATTCA     | CAAACCTCCTCCTATCACAGCC      |
| 132 | cgd6_1030 | AGTTAGATCACGAGGAAAGCGA     | TTGAGGCTAAGTTTGATGCTGA      |
| 132 | cgd6_1060 | GGCAAGTCAACTGGAAGATGTAA    | CTAAAGCCCTTCTTTCCCAATC      |
| 132 | cgd6_1070 | CGCATGGGTAATAAATCCAAA      | TGCTACTACTTGAGTTGCGGTC      |
| 132 | cgd6_1080 | AGAAGTGGAGAAGACGCAGAAG     | CTTTGAGCTGGAGTAGTGGGTT      |
| 132 | cgd6_1090 | AATTCGATGGGTCATTATTTGG     | CCTTGGGAACCTTGTCTCTTT       |
| 132 | cgd6_1100 | TGAAAGCACTCCCTCATCTAACT    | CATCTTCTCCTCAAACCTCGAAA     |
| 132 | cgd6_1110 | TATTGCCACAAGAGAACCTGAA     | CCATCTAATCCAATTCCTCCAA      |
| 132 | cgd6_1120 | GTTTACTAGCCAGACATTTGGAAGA  | TGAGACGTGTTCAATTAGCCTTT     |
| 132 | cgd6_1130 | TCTACTAACAGAACGTGTGTCC     | CCCAATAAATCACCTACCAATTCT    |
| 133 | cgd6_1140 | ATGACTGACGCATTCCCTACTT     | TTTGGTTTGGAGAGGTTTCTGT      |
| 133 | cgd6_1160 | AATTGCCATGTAGGTGATTGG      | GACCTTGTTCCCGTCATAGTTT      |
| 133 | cgd6_1170 | TTAATGGAATAGCGAAGGGAG      | CTCTGGGCTTATTATCTTTGCC      |
| 133 | cgd6_1180 | AAGCAAGTTTCAATGGGAGAAG     | TCAACGGCTAGATAACCACCTAA     |
| 133 | cgd6_1200 | TGAAGAGGCTAAAGACAAATCCA    | GTAATCCAGTACACCCGATAGCA     |
| 133 | cgd6_1230 | ACCGGCTAGATTAACCAATTCA     | ACTATTCCAAACCCAATGCAAG      |
| 133 | cgd6_1270 | TGCGACATATACAGATGGCTTT     | GCCTGGTTAAGTGAAGAAGA        |
| 133 | cgd6_1280 | GTGATTTCTGGAGCTTTGCATT     | CACAAACAGGTTCTTTTCATCCC     |
| 133 | cgd6_1300 | CTAAGTCATCTCGCTGTTCCG      | ATCTTGACCATCCTGACCATT       |
| 133 | cgd6_1310 | TACAAATGCCGGACTGAGAAC      | ACTGAAAGGAGATGGAGGAGG       |
| 133 | cgd6_1320 | AATACCGTCCAAAGTCACCAA      | TGCAGGAACAATATCGACTCTACT    |
| 133 | cgd6_1330 | AAGCGTGGATTTAACACGAACT     | CATATCTGCACGAATCACCAAC      |
| 134 | cgd6_1340 | AAAGTTCCAAGGTTATTGGGTTT    | GGATTGAGTTTATCGACTGCTCTT    |
| 134 | cgd6_1350 | TGAATATAATGGGATTGGAGGAA    | ATCGTTCTCTAAAGGATCGTAATCTC  |
| 134 | cgd6_1370 | TTGCGGATGTGTCTTTGTAGATT    | TTGCTCAGTCTCAATGTGGTTT      |
| 134 | cgd6_1380 | AATTATCAATGGGAGCCAAGAA     | GGGTCATTCTAACTCTATGCGG      |
| 134 | cgd6_1390 | TGGTATAGAAGCAAAGCAACCA     | CGACAAGCACTTCATCATTCTC      |
| 134 | cgd6_1400 | CAGGATGCTTTGTATTTACTGCC    | ACCCGTTGAGATGTAGTTTGCT      |
| 134 | cgd6_1410 | TGAGAAAGCACCATTAAGCAAA     | TGGTATCCTTCATTCCAAATCC      |
| 134 | cgd6_1420 | AGTCTCTCGCAGCACCTATCTC     | ATTCATTCTTGCTTCTGCCTTC      |
| 134 | cgd6_1430 | TGCTCCTCAGTAAATCCTCCTC     | GATCATGTGAGTTTGACGCATT      |
| 134 | cgd6_1440 | TCAAATCCCACGATACAAAGA      | TCATTTCTCCGCTATCAGAATG      |
| 134 | cgd6_1450 | GGTTCCACTTTCATAACCCTGA     | TGAGCCATTCAACAATAATCAAA     |
| 134 | cgd6_1460 | GAGAAATCAACCGAAATGCTAAA    | ATTGGTCTTCCCAACCTATCAA      |
| 135 | cgd6_1470 | AAATGAAAGCATCCAATCAAATC    | GCCTGATATGCCCTACTAAACC      |
| 135 | cgd6_1480 | TTACTTGGGACAACGAAGACATT    | TTTCTACATAACAACCCATCCTTCA   |
| 135 | cgd6_1490 | ACTCAAGCTGGGCTAAAGAATG     | CGAATGACGATGAGGTATCAAA      |
| 135 | cgd6_1500 | GCATGTTTAATACTCTGCTCCGT    | GAAGAGAACCCATAATTCCCAA      |
| 135 | cgd6_1510 | TGACATTTATCTTTGCGTTCGT     | GCATTTATCCCGACTTCTGTCT      |
| 135 | cgd6_1520 | TTTGCCTCCATTATCACTACCA     | AAATTGCTTTACACCCTCGTTT      |
| 135 | cgd6_1530 | TTAATGAGAGCATTGGATGGTG     | TGTTGAGCTTGAAACACTTGAGA     |
| 135 | cgd6_1550 | TCAATCCCCTAATTTCTGCC       | ATTATACGTTGCATAGCCGTC       |
| 135 | cgd6_1560 | AACAGTAGAGGTGGAGGGTACAGA   | CGTCCCGACATAGTGATAAACC      |
| 135 | cgd6_1570 | CTGGGTCGTTTGACCAGATAA      | GTCTCCAGGCACTTCTAAATCTTC    |
| 135 | cgd6_1580 | GACTTATTCCGGTTTGTGTGTTT    | AATTTCTCTTTGCATCGCTT        |
| 135 | cgd6_1590 | ATTGGACAAGGGATGAAAGAAA     | TGCCCTATACTGACGAAGTTGA      |

|               |                              |                             |
|---------------|------------------------------|-----------------------------|
| 136 cgd6_1600 | GAAC TTT CGG AT GT GAG CT GT | CCTCTTATATTCTCTCTCTTTCCACC  |
| 136 cgd6_1610 | AAACCACTCTTCGTCTTGCC         | AAGTCCATGTTTACACCCTTCC      |
| 136 cgd6_1620 | GATCTTCATGCGATTCTCTTC        | CCTTAATGCCGTTCTTTGTTTC      |
| 136 cgd6_1630 | AGA ACT GGCTTAAATGTGACTGG    | CATCAGGAACGTCATCTTCATC      |
| 136 cgd6_1640 | GGACATTCCAGCACATTAGACA       | TTACCAATCTTACGGATGCAGA      |
| 136 cgd6_1670 | TGGTTGTGTTGGTAAACCTTCTT      | TTTGGCTCAATGGTAGTGAATG      |
| 136 cgd6_1680 | GAGATCATGCCACAAATTACCA       | ATTCCCAACGTAGACTTCCCTT      |
| 136 cgd6_1700 | CGCTTTAACTGCCGTAACATTC       | TTTCTTAGCTCATCACGCCATT      |
| 136 cgd6_1710 | CTTAAATCCATATTGCCCGAGA       | TCATCCATTCTCTCTCCATTCC      |
| 136 cgd6_1720 | TCGAAGCTGAAGGGTGAAC T        | GACCTCGTATCCTGTAGCCATC      |
| 136 cgd6_1730 | GCCGACATTCTGTTGTTTGTAG       | GTGTGTCATCTGCCTTGTGTTT      |
| 136 cgd6_1740 | AAATGCTATGGTAACAGGGTGG       | CGATGAGGTATTTGAAGGAAGG      |
| 137 cgd6_1750 | ATAAGGATGGGTCATTTCTGTTG      | GCGCCTATTATGTCAATTTCTG      |
| 137 cgd6_1760 | TTATACTTGGTGTGGAGATCGG       | GTTTAATCCGCCATAGCTTC        |
| 137 cgd6_1770 | TATACCAATGAATGCTGACGA        | GGTTGGAACGTAAGTGCTTGT       |
| 137 cgd6_1780 | GCAGAAGGGCATTGTAATTTGT       | CTTTGATTGAGTGGGAACGG        |
| 137 cgd6_1790 | ACAATGGAACAAATAGCGCAG        | TGAATCGTTTACAGAGAGCCAA      |
| 137 cgd6_1810 | GCTGAACTCGAATCAACACAAA       | GCTCTTTCAACTGCAATACGG       |
| 137 cgd6_1820 | TGTTTATCCCGAGCATCAATAC       | ACGCCTCTCTTCTTTCCGTT        |
| 137 cgd6_1830 | GTCAGCTCCTACAGACGCAAC        | TTTCGCTCTATCAATGTCCTCA      |
| 137 cgd6_1840 | AGAGGCCAACTCAAAGCACTAA       | TTTCAACTCGTCCGTCCATAA       |
| 137 cgd6_1860 | CTTCCAGCAAAGCAATAACCAG       | TCCCATATTCATAAGCATCCCA      |
| 137 cgd6_1870 | ACGAACACAAGCGGATCAAG         | TTTCTGCAATAGTTGGATCTTCTACAC |
| 137 cgd6_1900 | GCGGATTCAAATACACCAGAAC       | TGATCCCTTATCCTTTGCACTC      |
| 138 cgd6_1910 | TGAATATAAAGGGCAATCCCAC       | TGTGGATCTGGAACGTAAC TTG     |
| 138 cgd6_1930 | GAAATGAGCGAGCTATACATTGATT    | AAGATTATTCCTTCCCTCGTCTG     |
| 138 cgd6_1940 | ATGAGCGATGGGATGGTAAA         | GCTGGCCTGAAGAATTGAGTAG      |
| 138 cgd6_1950 | CGAGTCTGAGGGAGCTAAGAAG       | AAGCAAATCCAATCACAAAGT       |
| 138 cgd6_1960 | GTGCGACTGGAATCTTGTAA TG      | ATTTGATCTATGCTCATCGCC       |
| 138 cgd6_1970 | ACATTTCTGAGTCTGGGCACTT       | CTTGAGAATAGTTTGCCATCCAC     |
| 138 cgd6_1990 | TCCAAATCCAATGAAAGTGAAA       | TCAAATTACCGCAAGTACCAA       |
| 138 cgd6_2000 | TTCTCCAGTTGCTCTCCAAAC        | GATCCAAAGGACCATCAGAAAC      |
| 138 cgd6_2020 | TTCGTCGCTACTTGGGTCTATT       | ACCGATACTTCAGGAGGAGAGAG     |
| 138 cgd6_2030 | GTTTGCATTGTCTGGTGGATTT       | TCGTATTGACATCATAACCGCA      |
| 138 cgd6_2040 | GCCGTAGTAAGATATGAGGCGA       | CAAAGCAGCAGTAAGCATGAGA      |
| 138 cgd6_2060 | CGACTTTCCTGAGTTCCTTGT        | CTGGGTATTAGCTTCATTTCCG      |
| 139 cgd6_2070 | CGACATAAAGAAACTCGCAGAA       | GATCAGGGCAACATTGAAATAAC     |
| 139 cgd6_2080 | AATCGAGCTTAATGGGTTAGCA       | CTTGACGCCTTCCATATCAACT      |
| 139 cgd6_2090 | TATTTCTGCTCATCCACACCAC       | TGCATTTCAATTTGCTGAATAGG     |
| 139 cgd6_2100 | TCCAAACTTGCCACTACCAA         | CCGCGAATAACCCATCTAACT       |
| 139 cgd6_2110 | GACGTGAAATACGAGCAAACAG       | CAATGGTACGGCTTCATTCA        |
| 139 cgd6_2120 | AGCACTTTATTTCTTCTGAAACAC     | CCAAATGTTCTTCATAGTTCTCACTT  |
| 139 cgd6_2130 | GTACAGCTTGGGCTTGAACAG        | CCTAAGACATCAGCAACAATTCC     |
| 139 cgd6_2140 | TATTTGGGCAACAACAAGATG        | AATCATAGGAAAGCATCCACAAA     |
| 139 cgd6_2150 | TGCTGTGAATAATGAAATTGGG       | TTTAACCATTGAGCCAGGTATTG     |
| 139 cgd6_2170 | AGCAGAGGTGAACCCTATGAAA       | CCTACGGATAGAGAATGAACGG      |
| 139 cgd6_2180 | CAAAGTCACATGCTCTAGCCAC       | TGCTTCTTCTTCTTCCAACCTC      |
| 139 cgd6_2190 | GGAGAAAGGATGGATGGAGTAA       | AGGAACCACTCTAATGCAAACC      |
| 140 cgd6_2200 | TGAAGGTGAAAGGCAGAATACC       | AACCGGAGTAACAAGCATTGAG      |
| 140 cgd6_2210 | TAAGCCCATTTAACGAAGCAAC       | CTAATACTGCCATCATCGTCCA      |
| 140 cgd6_2220 | AGCTCCTTTGGGATTTAGAGCA       | GTACAAACACCAGTCGCCCTT       |
| 140 cgd6_2240 | GGATTTCTGACCATTCTCATCC       | TTTCTCATCTCCGACGTATTT       |
| 140 cgd6_2250 | AAGAGCCTTGAATGCAGAA          | TCTGTCCTCAGAAAGTGACCAA      |
| 140 cgd6_2260 | TCAGCAGGATGTATTGTTGGAG       | AAATTGTTTGCCTCCAGAG         |
| 140 cgd6_2270 | GACCAGGAGATCGAAGGTATGT       | GCTGAAGACATTAGTGAACGA       |
| 140 cgd6_2280 | TTCACTGGAATCTTGAGACGG        | TGACTCTTCACTAGGTCTTTCAATGT  |
| 140 cgd6_2290 | TGGATGACCTTTACGACGATTT       | TCGTTACTAGAGGGAGTTGCGT      |
| 140 cgd6_2300 | CTCAACTTTGCTTGCTATCCCT       | TTTGAATGCTACTTTCTTCCC       |
| 140 cgd6_2310 | AAATTGCTCTCCCGAAGTTACA       | GGAATGGTCACATACTCCATCA      |

|     |           |                          |                           |
|-----|-----------|--------------------------|---------------------------|
| 140 | cgd6_2320 | TTCTCAAGGAACTCCACCTCTC   | AGAATAGATGCGCCATAATCGT    |
| 141 | cgd6_2340 | GCAGATGTGACCCAAGTACAAA   | ATTAGCGGAGCACTTAAACCAA    |
| 141 | cgd6_2350 | ATCTCTGGAGGTATAAGCGGTG   | GGTAAGCCATAAAGCACGTAGAA   |
| 141 | cgd6_2360 | CGGAAGATAAATTGCTCGCTAC   | ACATAACCCAATATGGTCGCTC    |
| 141 | cgd6_2370 | AATTGACAGAAGATGCGATTTG   | GTGGGTCTCCAAAGAGAGGTAG    |
| 141 | cgd6_2390 | CTTATTTGGAGTCGTTCAAGGG   | TCTTCTGGAGTTCTTGCTTGTG    |
| 141 | cgd6_2410 | ATTTATATTTCCGCACCAAACC   | TGCTTCTCACACTTGAATAATG    |
| 141 | cgd6_2430 | TGCAAGAAGAAAGAAGAGAGCA   | ACTTCACCAATAGCAGGGAAAG    |
| 141 | cgd6_2440 | TCATGGATAGTCGTAACCTTTGCT | CCCATCTTTATGCCTCAATTC     |
| 141 | cgd6_2450 | AGTTATTGGATGCAGGAAAGTCA  | GCAGTTTACCCATCTTCTTGA     |
| 141 | cgd6_2460 | CCCATTAAGGTTGGAGATTATGTT | TGAGTCTTACGTGCTCGATTCT    |
| 141 | cgd6_2470 | ACTTTATGAGGCTGAGGGTCTG   | CAACGTAAGAAATGGATGACGA    |
| 141 | cgd6_2480 | TGCGATCAACAACTTCAACTC    | AGCCCTAGCGTAGTCAAATCAG    |
| 142 | cgd6_2490 | AGGAATTGTCTTGGCATTAGCA   | GTAGCGAGTTAGCGACTTCAGG    |
| 142 | cgd6_2500 | GGAATAAGCTGGTGCATGAAGT   | ACGATTGCTGGCTAAAGAAAGA    |
| 142 | cgd6_2510 | AGTCATAGATTTGAACCCACAACA | GCCACCATGATTGATAACACTTT   |
| 142 | cgd6_2520 | TGTTTAGGGCTCAATCAGGAA    | CAGGTCAATGCAACAACAAAGT    |
| 142 | cgd6_2540 | AAAGCGTTGATTTGGAAGTCTATT | ACTCCTCGTTTGTGAAGTTTGG    |
| 142 | cgd6_2550 | TTGATGATTTAGGTGCAAATGG   | AACCTTTGGTCATTGTCAGTTTCT  |
| 142 | cgd6_2560 | ATGCCTGATGAAGATGATGAAA   | ATTTGGAATAATGAAGACCCGA    |
| 142 | cgd6_2570 | CAGGTACGAAGGATATTGGGAA   | CTGTAGGCTGTGGAATTGTGAA    |
| 142 | cgd6_2580 | CAGCACCTACATCTTTCCCTTC   | ACGTACAACCTGATGGTGTGG     |
| 142 | cgd6_2590 | ATGGTTAATATGGCTTTGCGTT   | TTGCTTGAGACTGCTTCATT      |
| 142 | cgd6_2610 | TGACTCTGTTTCTTGCTTGGAG   | GTCCGTCTTGTTAATCCTTGGT    |
| 142 | cgd6_2620 | ATTTAGTACGTCCGAGCAGTGG   | GGATCAAGAACCTGTGAGAAGG    |
| 143 | cgd6_2640 | TCATTTATGGTTTGTGGCTTGA   | CTTGGCTGTTTCCAGGGCTATT    |
| 143 | cgd6_2660 | ACTCTTTGTTTCTTCTCTCTGG   | GCGCCTATTCTTGCATTTATCT    |
| 143 | cgd6_2670 | GGGTTGCTTTGAGTAGGCATT    | TCATCGTACACAGTAAATCTGGCT  |
| 143 | cgd6_2680 | TCCAGAGGTTTCACTGCTTACA   | GGAGCTTGAACCTACGAACACAA   |
| 143 | cgd6_2690 | CCTAAGCCAGAAGATGAGGTTG   | TAACGCGAGATTTGGAGCTTT     |
| 143 | cgd6_2700 | GGCTCTTGTTCATTCTTACC     | TTTCATCCCATATTCCACCATT    |
| 143 | cgd6_2710 | AGCTGCATATCTACTGGCTTGAC  | GCCCAAATGTGATAGAGTGGA     |
| 143 | cgd6_2720 | AGAAATGCTAGGAGAAGCGAGA   | GCAATACTTGGCTGTGCAATAA    |
| 143 | cgd6_2740 | TTGATACGCCTACCTCTCTGGT   | TACTCGACAAACCCAAATCCTC    |
| 143 | cgd6_2750 | AGTTCACCCGCCTTATTTCTTT   | AAGCAAGCATTCTCTCTCATC     |
| 143 | cgd6_2760 | GTTGACGGTGTATCACATTACGA  | TATCACGAGCCGAAGATGAA      |
| 143 | cgd6_2770 | CAGCAGCAATCTTGAGTAATGG   | GCTTTAACTTTTATTGGTTGGG    |
| 144 | cgd6_2780 | CAGGGAAGGAAATGTATGGAAA   | CAAGAATGGAACAAAGGGAAA     |
| 144 | cgd6_2790 | CATAGAGCTGTGGCATCTACAAA  | CCAAAGTTAATCCTTCTGCTCC    |
| 144 | cgd6_2800 | TTAGCGGAATCTTGTAAATGCTGT | AAACGTGATCTGTGATGCTTTG    |
| 144 | cgd6_2810 | CCCTTTGGGAGTATGTATGGG    | TTTGGGTTCTTTGTCTCATCT     |
| 144 | cgd6_2820 | GGTATGGAGACTTTGAGGTTCTG  | ACAATTTAGCTGGAAGAGTGGA    |
| 144 | cgd6_2850 | TCCGCCAATACAACTAGAACCC   | CATAATAGGTCCAAGACGCACC    |
| 144 | cgd6_2860 | TGCTGGTTGCCACATAAATAAA   | CCTCAATATCCATCGAAAGCA     |
| 144 | cgd6_2870 | CCAGGAGCATCATCTACCATCT   | TATAACTGGGCTGAAACTGGCT    |
| 144 | cgd6_2880 | AGACTCGTTCTCTGGTATTGGG   | TGTTGAAAGCTCCTTATCTTGTG   |
| 144 | cgd6_2890 | GAAGCGAGCAAAGCGATAAG     | CTGTGAGGTTCCGGTAATGTTT    |
| 144 | cgd6_2930 | TATTCAAAGCCATAGCGACTCA   | GACGCAAAGAAAGTGTCCAAG     |
| 144 | cgd6_2940 | TGAATTACTTTCCAAGCAGCAA   | TATCCATCCTGTCAATTTGGA     |
| 145 | cgd6_2950 | GCGCTAACAAACCCTCTAACATC  | CATTTGCTGTTGCTGTTCACTT    |
| 145 | cgd6_2960 | GCAACTAATTCAAGAAAGTCCCA  | AAATGAACCAGCAATAATAGAGGAG |
| 145 | cgd6_2970 | AATTCGGTCATTTCCATGTTTC   | TAGCATAAGGTTCAAAGCGTCA    |
| 145 | cgd6_2980 | AAAGAGCATGAAAGACGAACTTG  | TTTGAACATCTGGTAGAAAGGGA   |
| 145 | cgd6_2990 | CTCCAATTCAGCCATTATTTCC   | CTGCAAGCTCATTCAACAAATC    |
| 145 | cgd6_3000 | CTTTGCTATAACTCAGGCTCCAA  | GACCGATAGTTTGTCCGTTTC     |
| 145 | cgd6_3010 | GAGAGCCACCAAAGATACCAAG   | AAACCCAAATCCTCTTGAGACA    |
| 145 | cgd6_3020 | ATGATTTATGAGTGGGTGGCTC   | AGATTGAAAGACCGACAACCTG    |
| 145 | cgd6_3030 | AATGGGTGAAATGAAACAGGTC   | TTCTTACAAGCCACAACGATG     |
| 145 | cgd6_3040 | AGATGAGTTGGAACGGATAGTGA  | TCTCCTTCATTGATTTGCC       |

|               |                           |                             |
|---------------|---------------------------|-----------------------------|
| 145 cgd6_3050 | CTCCAGGTTACCATATTCTCC     | TATTCAGACCCATCAACTCCAA      |
| 145 cgd6_3060 | TGATGGAAAGCGAAGATGATG     | CCATTCTCTAATTCATTCCCAAGA    |
| 146 cgd6_3070 | CCAGCTTCATTCCATAACTCTTG   | AGGCATTTGTATTGGCTCTTTG      |
| 146 cgd6_3080 | ACCCACGATACAATTTCTGGAC    | TTGACCAGCTAAATCAACAGGA      |
| 146 cgd6_3090 | AAAGATTTCCACAATAGCCCAA    | CAAGGAACTTTGAATAAACAACCA    |
| 146 cgd6_3100 | TGATTGTTGGGACAAGAGTTACA   | TTATCAAGCCCTATTTGGTTAAGAG   |
| 146 cgd6_3120 | TGGAATGAACAAGAATAATGATGAA | TCACAAGCAATTACACTAGACCAAA   |
| 146 cgd6_3130 | TTCAAATTCTAACCAACCTCCTTT  | GGCGCTTTACCTTGAGTTCTT       |
| 146 cgd6_3140 | CTCACAAGATTGGTCTGGTTCA    | GTAACCTCCGCCAGTTTCAGATT     |
| 146 cgd6_3150 | TCCTATCCACTTCTATTGACCCA   | TGGTAGTCTTGATCCCTGTCT       |
| 146 cgd6_3160 | C TTCAGTAGTTATCGGTTCTGGG  | CCTGCATCTTCTCACTTGTTTG      |
| 146 cgd6_3170 | GGCGAAGCTATTGGGTTACTT     | TCTCTCAAATCCTTCACATCCA      |
| 146 cgd6_3180 | AAGCTCCTTACCATGAAATTGG    | TGGACATTAGCCTTAGATTTG       |
| 146 cgd6_3190 | CAGGAGGTACATTTGGTCGTCT    | TATCAGCGTTAGTCATTGCTGG      |
| 147 cgd6_3210 | GCAATCCAGTCTCAGGTAATCC    | TTGCTGTGCTAACTCTCTTGTTG     |
| 147 cgd6_3220 | ACATCAGACGAGGGAAGAGAAC    | CTCCTGCTAACTGGGACCTT        |
| 147 cgd6_3230 | GGCCCATTTGGATTAAGAGTT     | CATCAATTCACCTTCTGGATGCT     |
| 147 cgd6_3240 | TTCAGTTGTTGCAGAGTCCAAG    | CCTCATGTATTGGGTGTTTATATGG   |
| 147 cgd6_3250 | GCAAATAGGTCTCTTCAGCTTCATC | CCTCGTCATGTTGCTTCTTTGT      |
| 147 cgd6_3260 | AAAGAATGTCAAATACCACACGAA  | TAGGCTCACCAATATCTCCA        |
| 147 cgd6_3270 | GGATTTGTGAAACTAGCAAGCA    | TCAACATCAGCATTCAACCTTT      |
| 147 cgd6_3280 | TTAGCTCAAGGCGATACAATCA    | GTGAGAAGCATGAACAGTGGAG      |
| 147 cgd6_3290 | CAAATGTTTCCAGAATTGCATC    | TCCGAGACTTTCTTCTCCTGT       |
| 147 cgd6_3300 | TGACCCAAATCCTCCTAAGAAA    | CATGCTGGTAATCAATCATCAA      |
| 147 cgd6_3310 | GCAATCAAAGACCCTTCTAAACA   | TCCTTTCTCCTGATCCATTC        |
| 147 cgd6_3330 | TTAAACGCGAACTCACACAATC    | TGATCCTTCTCTACACAGGCAA      |
| 148 cgd6_3350 | GGAGTAGATCGGGTTTGAATGA    | CAAATATAAACTGGGAACAACCACTAC |
| 148 cgd6_3370 | TGAGCGGTTCCATTATAGTTT     | ATTACCATTGCATCTCCTGCT       |
| 148 cgd6_3380 | TTCTTTGATGAAGTGCACAGG     | CTTCGCCAGTAGATGGGTCT        |
| 148 cgd6_3390 | ATTGGTCATTCACTTCCATTCC    | CGACCTAACACAACCTCAAACA      |
| 148 cgd6_3400 | AAGGCAAGGATATACACAAGCAA   | CCAAAGACCATAAATCAGCCTC      |
| 148 cgd6_3410 | C TTCCTCCTCCTCTTCTCTTC    | GCAGATTGTTTAGGATGGTATGATT   |
| 148 cgd6_3420 | ATAGCGTGATTGGAGGATCAG     | C TTCGTCATCTTCTTCATCTTCTT   |
| 148 cgd6_3510 | CCTCTTGTTAGTCCAGCAGTCTC   | CTCTTAATTGCCACCTTTGGTT      |
| 148 cgd6_3520 | AGAGGCCAATGCTTATTAGTC     | ATTCTCATTTCTGTTCTCCA        |
| 148 cgd6_3550 | TTCATTTACACAAGGACCAGGA    | TTCCCATTTCTATGTGAGCAAC      |
| 148 cgd6_3560 | C TTATTGGGCCGTTACATCAA    | TTCCAAGCATTCTCACATCAAC      |
| 148 cgd6_3570 | AAATTCGACGGTTTCTTTATGG    | ATGCGTCCTGACTTGTGTATGT      |
| 149 cgd6_3590 | TCAAAGATCATGTCCCAACAAA    | GACCATATCACTGCTTAACTCGG     |
| 149 cgd6_3610 | AATGCCACTCTTTGATGTTCT     | AGTCTCTCAGTTCCTGCTCAC       |
| 149 cgd6_3620 | AGGATTTAACAGCCAAACAGGA    | TGAGAGACCCATTCTTTCTACCA     |
| 149 cgd6_3640 | TCAGAGAGCTAATCCAAGACCC    | ACTCTACATCGAAAGCGGAGAC      |
| 149 cgd6_3650 | TTCTTCACCAAATACTGCAAGGT   | AAATTCTCATCATCCGCAAAGT      |
| 149 cgd6_3660 | TGAAGTCTCATGTTGTGGTGACT   | CTAATCTTGATCGCATGTGTGTG     |
| 149 cgd6_3680 | GCAAGTCAAAGAACTACCAAG     | TCCCACAGAACTGGATGATAAA      |
| 149 cgd6_3690 | CAATTTAGACCCAACCACACAA    | TTGAGCATTAGGAACAAATCCA      |
| 149 cgd6_3710 | AATATGGCTAAAGCACACGGTT    | TCTCTTCTTGCTCTTCCAGTC       |
| 149 cgd6_3720 | TCATAGAAACGATGTATGGCACTT  | TTCTGCTTGAGTAGAACCTCC       |
| 149 cgd6_3730 | CGATTACATTCAAGCCTCAACA    | ATTGTTTCCAGATCCCATACCA      |
| 149 cgd6_3750 | TTGGGTGAGTATGGAGTTGATG    | CTGCAATTAGAAACCTACCAGGA     |
| 150 cgd6_3770 | C TTTGAATGAAGCAACCACAAC   | GATAGTCCAGAAACCATGAGTGAA    |
| 150 cgd6_3780 | TTGGAAGATCAAATCAAAGGAAA   | AATGAATGAAACAAACACCAACC     |
| 150 cgd6_3790 | AATGGAAAGCTCACAGGTATGG    | GCTTCCTTAACGGCTTGATAGA      |
| 150 cgd6_3800 | TCCCATTAGAAGTTGGCTTCAC    | AACGCATTTACATTGAGCTGG       |
| 150 cgd6_3810 | ATACTTGGGAACTTGGTGGAGA    | TCTTTAACACATGGTGCTTTGG      |
| 150 cgd6_3820 | CCAATATGGTACGGGTTCTTGT    | CATCGAATGGTAATTCAGCAA       |
| 150 cgd6_3830 | CACAGAAGATGGTTGACTTTGCT   | TTGGATGAAGTTTCGCCATT        |
| 150 cgd6_3840 | TGACAGCGACTCCATTCTACTT    | ATTCGACTCCCAAAGTCATTC       |
| 150 cgd6_3860 | TGAATGACCCTTGAGAGACTT     | TCTGATCCCAACTCCATAACC       |

|     |           |                          |                           |
|-----|-----------|--------------------------|---------------------------|
| 150 | cgd6_3870 | AGCATTCCATATTACACACCACC  | AAGAAAGAAACCGATGATTCCA    |
| 150 | cgd6_3890 | TCTTGTGGTATGGCTTAGGAAGA  | TGCCAATCTTGTTGTGTAGTTTG   |
| 150 | cgd6_3900 | GTTACAGCCAATCAAGAAGAAGG  | AGATCCGTAGCAGAAGCTGAGT    |
| 151 | cgd6_3920 | AAGGAGTTCCCAAGTAAGAATCAC | AGCAAGTTTATCGCTCTCATTTT   |
| 151 | cgd6_3950 | AATTGTGGCTTTCCTTGGTG     | AGAATTGTAGGTTTGATTGAACAGG |
| 151 | cgd6_3960 | CTGAAGGAATCGGAGATCAAAC   | CTCCAGAATGAGCCTATCCATC    |
| 151 | cgd6_3990 | AAGAGACCAACTGACAAGCCAC   | GCTCATGGTGCATTTCTACTGA    |
| 151 | cgd6_4000 | AGCATGGAATGGAGTTTCTTCT   | TGGTCGTAATAAGTTTCCCACA    |
| 151 | cgd6_4020 | TTATGCCTCCAACACTTCCAAA   | GCTTCAACTTCGATACTCCTTGA   |
| 151 | cgd6_4030 | GGGATGTAATGAAGGAAGATGG   | TCTTAGCTGTTGGGTCCTGTTT    |
| 151 | cgd6_4040 | CAAGATCAGAAGATCCCATTGA   | G TTCAGCTCCACGTTAAAGACA   |
| 151 | cgd6_4050 | GAGGCCCATATTCTCCCTATTC   | ACAGCTCGCACCAAACCTACT     |
| 151 | cgd6_4060 | GAAGCTGCCAAATACACATCAA   | AACTCCAACCTCTAAACGGGA     |
| 151 | cgd6_4070 | TTTCATCTCCTCAGTCATCAACA  | TTTCATCAAATCTGCTTCCCTCT   |
| 151 | cgd6_4080 | GGATGGGTTTCAAGATAAATCAA  | ATGCGATTGGTAGTAAGGGAAG    |
| 152 | cgd6_4090 | AAACCCAAAGTTATGAGGAAAGG  | AACTCTTCCAATATCCCAAGTTCA  |
| 152 | cgd6_4100 | TTTACATGGCGTTTCTCATTCA   | CCATTCTAGGGAAGGGATGG      |
| 152 | cgd6_4110 | GGTGGAGGATGTTTATTGGAAA   | TATCCATTCAAGGCGTAATCT     |
| 152 | cgd6_4120 | GATCAATGCACGATGGAGTAAG   | TGCAAGATGCTGAGAAATAGGA    |
| 152 | cgd6_4140 | ATCACACGCTTCTCAGGATTT    | TCCCTTTGTATTCTTGATTGG     |
| 152 | cgd6_4150 | AGGAGCATCTTCTACTGCAACC   | GACGTTTAATAGGGCCAACATC    |
| 152 | cgd6_4160 | GAAGCCACAGATTGTTGTGAAA   | ATCCAAGCCTCAGCACTAACC     |
| 152 | cgd6_4170 | TTCATTCTCAAACCCAAATCCT   | AGGAGGCTGCATGTTGTTATTT    |
| 152 | cgd6_4180 | CCAGACGGGAGGATATGTTTAG   | GTGTTTGCAGGAGAATTAGGATTT  |
| 152 | cgd6_4200 | ACTGCAAACGAATCAAACCTCT   | GGATCACCACCAACGTCTAGTAA   |
| 152 | cgd6_4220 | ACCCTTGAGTCTCTTTGATTG    | GGAATATGGATGTTCTTTGCC     |
| 152 | cgd6_4230 | ATAAGAAGGTGGGTCCAAAGG    | ATTCCCAGGCGATAATGAACT     |
| 153 | cgd6_4240 | CACAAAGGCATGGTTTAAAGATTG | CCTGGTGATTTATTGGGATTTG    |
| 153 | cgd6_4270 | AATGTTGCTCTAGCCAATCTTCTT | AAGTTCATGGTTGGATCTTGCT    |
| 153 | cgd6_4280 | AGTTTGTTCTTTGGGAAATCTGAC | CGGTCGCCATGTAGTGATAAG     |
| 153 | cgd6_4290 | TTCATGCAGGGAATAATGACAG   | AAATTGGTGATGGTGAACCTCC    |
| 153 | cgd6_4310 | TCTATGGCCTCCAATGAAACT    | TTAAAGACAAGAAGGCTGGACAA   |
| 153 | cgd6_4320 | AAACATCAAGACCATTGCTGAA   | GCAACACGTTCTACCTCATCC     |
| 153 | cgd6_4330 | AGCAAACAATGCAACCAATAAC   | TGACTTCTGGTCTTCCCTTTCT    |
| 153 | cgd6_4340 | TGAGATCAGAAGTGAATGGGAA   | CGGTGATGCAAGAAGTTAGAGA    |
| 153 | cgd6_4350 | TACAATTAGGTATTGACCCGCC   | TAACCATTCTTGCTCCTTCTCC    |
| 153 | cgd6_4360 | CTTGCACTTGGTTTGACTTGCT   | CGAAACTGAAGGCTGTGGATAA    |
| 153 | cgd6_4370 | AAACTCGTTATCATGGATTGGG   | TATACCGTTGTCATTCTGTTG     |
| 153 | cgd6_4380 | TGTAGAGATCATTGCCCTGAAA   | AACTTTGTTGGAGAAATAAACCCA  |
| 154 | cgd6_4390 | ATGACAGGAGAAGCAAACATACC  | CATGCAAATTCTGATATGAAACAA  |
| 154 | cgd6_4400 | TATTTAAGGCCAAACAACGACA   | TCACACCAAGGAGCTATAACCA    |
| 154 | cgd6_4410 | GATTTAAGTACCGGATCATGGG   | TGAAATGGGCTTATCCTTACAAA   |
| 154 | cgd6_4420 | GGTGGTTATCATGCCCTTAGTT   | TGTTTCAGGATCTCCCTTCTTC    |
| 154 | cgd6_4440 | CAAGCAACTCCACAAACTTCAC   | TTTCTTCGTAATATGGGAACGG    |
| 154 | cgd6_4460 | ACAGGTGTAAGCACAGCCATAA   | ATCTCTTGACTTCCCATCCAAA    |
| 154 | cgd6_4470 | AGATCCATTCCACAACATCTCC   | TCCATCAATAGCGCAAACATAG    |
| 154 | cgd6_4480 | AATGCAAAGGATAAATACGGGA   | CCGGAAATTGACTCCAAATAAG    |
| 154 | cgd6_4490 | ATCAAAGCAGTCAAAGCCCTAA   | TGAGATTTGTTGGTTGCAGAAG    |
| 154 | cgd6_4500 | TTGACCCTTCCCATAGTTGATT   | CTCCATTAAGGCATCTTCCAG     |
| 154 | cgd6_4510 | ATGAGAGTGAGGCAATCAGACA   | AAATTCAACCTCTTTGGCCTTT    |
| 154 | cgd6_4530 | GTTGAAAGTTCTGGGAAGGTTG   | TGTCTCGTTGCTTCTGTTGTG     |
| 155 | cgd6_4540 | GATTGCTTTGCTGTATGCTTGT   | TCTTCTGGCTCTGTATTTGTG     |
| 155 | cgd6_4550 | AGGCAAAGAGGGAGGATACTTT   | ATCCGTC AATTCCACTTCTCC    |
| 155 | cgd6_4570 | GGAAATGATAATGGGAGTGGAA   | ATGAAGTAAAGAGCCTGGTTGG    |
| 155 | cgd6_4580 | TGTTACTCCAGAGGCAGAAGATG  | TACATAATTGAGGGCAGGGAAG    |
| 155 | cgd6_4590 | TCAATGCAAATGCTACAAATGA   | AAGTGCAAAGGAGTACAGAGCA    |
| 155 | cgd6_4600 | GAGACGACCAAGATTGAGACAAA  | CAGCCAAGTCGAAAGGCTAA      |
| 155 | cgd6_4610 | TGTC AACACTCGTTTTGGTAAG  | TAAGCTCATTATCGCATCCTCC    |
| 155 | cgd6_4630 | GCAACTAGAAAGGCCAGATTGA   | ACATTGACCTGGACGAGAAGAA    |

|               |                             |                             |
|---------------|-----------------------------|-----------------------------|
| 155 cgd6_4640 | AGATTGGATGCCAGAATGGAC       | TTGCTTTGTTTCAGTAGTCCCA      |
| 155 cgd6_4650 | GTTTATGGTATGGGCTTGCATT      | CGAAGAAGAAGTGTGTGGTC        |
| 155 cgd6_4660 | CAAGATGGCTTTAACACAAGCA      | ATCCATTTCCAGGGTTAGGAGT      |
| 155 cgd6_4670 | AGCAGCACTAGAGAGGAGTTGG      | CATCTTGTTTGAATCTCGGTCA      |
| 156 cgd6_4680 | CCTAGTCAAGAGCCCAGAAAGA      | GCAATCAGAGAGCTAACCAACA      |
| 156 cgd6_4700 | AAATGGATGAGGACTGGCATAG      | AGAAACCCACAATAAAGCCAAA      |
| 156 cgd6_4710 | TCCACAACAGAAGAGGATTTGA      | AAATGAGCTTGGGATAAAGCAG      |
| 156 cgd6_4720 | ACAACAGCAAACAGCAGGTAGA      | GGGTCTTTGAGATGATAACGGA      |
| 156 cgd6_4730 | ACGCCACACAAATCAGTACATT      | TCAATGCAAGTAGTAGAAACCCTCT   |
| 156 cgd6_4740 | CCCTCGATACCTTTCCATTTT       | TCTGTGGAGTAGACCAACTAGGATT   |
| 156 cgd6_4750 | AAGGGTACGAGATTGTGAAACC      | GGAACATCCTTACTTTCTCCCA      |
| 156 cgd6_4760 | AGCCCTACAATGCAACCTTATC      | ACAAGTTACGCCAGACATAGCA      |
| 156 cgd6_4770 | TGATATGACTGGGACAGGTTCTT     | ATGACCTTGTTTACTCCCTCCA      |
| 156 cgd6_4780 | TTTGATGATGGTTCTTCCGTG       | GCTGCTGTGGTATTCTCTCTCC      |
| 156 cgd6_4790 | CTAACACCGCCACTAATGACAA      | TGAATAGAGTCCAGCCAAATGA      |
| 156 cgd6_4800 | GCTTCCCTAATAACGTACAGAA      | GTTTCACCTGCAAGAAATCCTC      |
| 157 cgd6_4810 | TTGAAGGAAATGGCAGAAATG       | CTCCAAGTATTGTAACCGGAGG      |
| 157 cgd6_4840 | TGCAAATAATAGAGGAGCACCAG     | ACTCCCTTCCAGTTAATCCAG       |
| 157 cgd6_4850 | GACTCCCTTAGAACAGAATGGG      | GCAATCACTCTACAAGCAGCA       |
| 157 cgd6_4870 | CCAGGAAGAAGGAATCAAGAAA      | TGACAAGATGAAAGGAGAATTTGA    |
| 157 cgd6_4880 | GGCACTAATCAACAAAGGGAAC      | TTGCTGGATCAACATAATCACC      |
| 157 cgd6_4900 | TGGTAAAGTCCAGGGTGTCTT       | GAATCTTCGTCTCCCTCCAAC       |
| 157 cgd6_4910 | GCCTTTGAGCCAGAATATGAGT      | GATTTCTACGATGCCAGGAAAG      |
| 157 cgd6_4920 | TCTAATGTGAAAGGCAAGACCA      | TTTGAAGGTAGTTGTATGGAGGG     |
| 157 cgd6_4930 | TGCTAGTGCTACACATGACCAA      | CCTAATAACAGGATCTTCATCTTCACT |
| 157 cgd6_4940 | AATACGACCAAGAGGAAAGCAA      | ATCCTGACATTCCAAGTGAACC      |
| 157 cgd6_4950 | CTTCAACAACAGCAAGGGAAGT      | CCAAACGAGGAGTTGGATAAGA      |
| 157 cgd6_4960 | TTGGTCAATAGGATGCGTTATG      | TCCAATGATATTCCTTCTCGGT      |
| 158 cgd6_4970 | ATGTGGCAATATCAACAAACGA      | CTGCATCAACTTTCTCACAACC      |
| 158 cgd6_4990 | CCGACAGAGAGAGGGATTTATG      | ATCAGAAGTTGTTCTGCACCT       |
| 158 cgd6_5000 | TTGATAATGTGCCAGGTTCAAG      | ATATTCGTGGGAGATGAGTTGG      |
| 158 cgd6_5010 | AATGTATATCAATGCAGAATCAGGAG  | TGAACAGAGACAAGTAATGTGGGT    |
| 158 cgd6_5020 | AGATTACCTTGAATGGCACAA       | TCTGAATCGTTTGGGACAGAA       |
| 158 cgd6_5030 | CAAGCCTCGAAGTGTTCAAGATT     | TCCCTGCTATTTCAAGAGGTGA      |
| 158 cgd6_5050 | AAGGAAGCCAATTTCACTCATC      | AGGTGACTGTTCACTCTCATCAAG    |
| 158 cgd6_5060 | ATTATAGTGGCGGTCAGAGTCC      | TTTATGTTGTTGTCCGTCGTTT      |
| 158 cgd6_5070 | TGGGAAATCCTTACTCTGCTTT      | CTTGTCGCTTCATATTTGTTGG      |
| 158 cgd6_5080 | TCAGGAAATTGAACAAGCAGAA      | TGCTCCTAATACAGCTCCAAGTC     |
| 158 cgd6_5090 | AAACGTCAGTCCCCTATAAATGA     | GTAGCAGGTCCAACAATTCCA       |
| 158 cgd6_5110 | AAATGAGTGGTTGCTTGGATTT      | TGATGAGACCAGTTTGGAGAGA      |
| 159 cgd6_5130 | TCAAGTCCCAAGAGTATCTCCA      | CGACCTGTCCTCTAATTTCACTCT    |
| 159 cgd6_5140 | GCATCCCAAGTACATAAAGCAA      | TCTTCCATACAACCAGTCCAAA      |
| 159 cgd6_5150 | ACAGCTTTGTTATGCCACTTTT      | TTGGACTTGGATGTCTCTGATTT     |
| 159 cgd6_5160 | CAGATTATGAATATAGAAGAGGCCAAA | GTTCTCCTGAAAGACTGATCCAA     |
| 159 cgd6_5170 | GGTATTGCCTTCTTAAACCAA       | CCTTATCTTGGCTCATTCCAAC      |
| 159 cgd6_5180 | GGTTACTTAATGATGGAGGGCA      | TTCCCTTTCTGGAGGAGGTATT      |
| 159 cgd6_5240 | AGAGAGGGGAGAATGTGATGGAA     | AATTGGAGAAGCTCTTTCGTTG      |
| 159 cgd6_5250 | TTATATGGAAGCCGTTGGAAGT      | CATTACACCTCCGTTTGAGACA      |
| 159 cgd6_5260 | TCTCTACGTTCTTTCTGGAGGG      | AAGGTGATTTGTTGGCTCATCT      |
| 159 cgd6_5280 | AGGCAAATCCAATAGACCAGAA      | ACTGAGACGCTCTGCTATCTCC      |
| 159 cgd6_5290 | ACCAGAGAGTTTCCAGGTATCAA     | GAATCCATCACAAGGAGAGACA      |
| 159 cgd6_5300 | ACTCAGAATATGTGCAGGAGGG      | TTTGACCTTGTAATCTCTTTGG      |
| 160 cgd6_5310 | GGAGTGTAAGAAATCAGCTTGGA     | GATGGAGAGTTATGCCTTCTG       |
| 160 cgd6_5320 | AGGCAGATCAGAATCAAGGAAA      | CCAACATAGCCAGTTACCCATC      |
| 160 cgd6_5330 | TTACAAACCAGCAAGCTCTTCA      | TCCTTCAAAGCTCCAATATGCT      |
| 160 cgd6_5340 | GCTCAGTATTCCTTGGCTCATT      | TCCTAGAAGACCAGCTCCAAC       |
| 160 cgd6_5350 | GGTTCCAATCCTAAAGAGCGT       | TCTCTCCCTTTGAGTCTTCCAG      |
| 160 cgd6_5360 | ATCAGGGAAGAAGAGGAGGAA       | CAGGATCACTCTGAACGAATGT      |
| 160 cgd6_5370 | TTCCCAGAAGATAACAAAGAAGAGA   | CAGTTTAGGACAAAGCGATGAA      |



|     |           |                             |                          |
|-----|-----------|-----------------------------|--------------------------|
| 160 | cgd6_5380 | TTGTTCCAGAGACTGCAATGAGAG    | TCCAAGTTCAAGACAAAGAGCA   |
| 160 | cgd6_5390 | ACCCTTTCTTAACTCCTCCTTCA     | TTCCAACCTCCAAATATCAGTTC  |
| 160 | cgd6_5400 | AGGAGATTGGCTCTGGATGTAA      | GTAGGCTGAGAGGTTATGGGAA   |
| 160 | cgd6_5410 | TTCCCACAGATTGACATTGAAG      | GGAGTTTCCAGAGAAGCAAGAA   |
| 160 | cgd6_5420 | CCGTTGGACAGGAGTTTGTATT      | AAGGTAAGACAGCAAGTGGAGG   |
| 161 | cgd6_5440 | CTGCATGTGGAAGGTATTTGA       | GACATCGAAATCTTGTGGTTGA   |
| 161 | cgd6_5450 | TGGAAGAAGGTTACAAGCAAAG      | AATTCTGCGGAGTAAAGCAAAG   |
| 161 | cgd6_5460 | TGTAGCTCCTATTCAACATCCATT    | CAAATGCCAACATGATTTCTTC   |
| 161 | cgd6_5480 | ACAACCATGCGATGATGAAA        | AACCTCTTGGCCTTGAATTGT    |
| 161 | cgd6_5490 | TGAAGGTTTGGAGTAGAGGTGGAA    | TGATGACGATGATGACAATGAA   |
| 161 | cgd6_5510 | ATACCTGGGCTCCACTCTCA        | TCATTAAAGCTCTCTTCATCCGT  |
| 161 | cgd6_5520 | CAATTTCTCAAACACAATTATACGGAA | CCGACTTGAATATGGAGAGTACCA |
| 161 | cgd7_10   | ATGGAGGACAATCATCACACAG      | AGCCAGAGCCATCATAAGTCA    |
| 161 | cgd7_30   | AAGGCCAGCAAATACTCAACTC      | ATCAACCTTGTCTCTTTCCCA    |
| 161 | cgd7_40   | TGCTTCGAGAATCCAAACTACA      | CAATTCCAGCGATAGGACTCA    |
| 161 | cgd7_60   | TCAACGAAGAGCCTAACTCACA      | TAGCAACGCAATTTCTCTATT    |
| 161 | cgd7_70   | ACCACGTATATGAGCAGAACTCAC    | CCTTGCGAAATAACAGCAGAC    |
| 162 | cgd7_80   | TATTGATTGGCTGATTGATGGA      | GTTGGAGATGATAGAAGTGTGCTG |
| 162 | cgd7_90   | AGCCTCCAAGCACTAACTGTGT      | AACTGAGAAGGGAATGGGAAGT   |
| 162 | cgd7_100  | ATAGCCACGCTTCTAAATGCTC      | ACAAAGGTAGGACCAGTCGTGT   |
| 162 | cgd7_110  | GGCGTCAAATGGCTATATCTTC      | TTTCTCTGTCAATGTATGCGGT   |
| 162 | cgd7_120  | ATCTTCGGGATCAGAAAGTGAA      | TTGGGTAGCTTGGAGGAGTAAA   |
| 162 | cgd7_130  | GAGTCAAGTCAAAGACAATGGGT     | TCTTCTGGTGCTATCAGTTGGA   |
| 162 | cgd7_140  | CACAGAACCCTCCAAATACACA      | TCTGCCATCCCTAATATCCTTC   |
| 162 | cgd7_160  | TATGTTTGGGCAGTTAAGGTGA      | CACGAGTATGCTGGAGAATTTG   |
| 162 | cgd7_180  | CCAATGAGGAACTAACCTAAGAAG    | TTGCATAGCCAACTGGAACA     |
| 162 | cgd7_200  | GAATCGTATTGCTTCCGTTTCT      | CAAACCCAGTAGCCAAATCTTC   |
| 162 | cgd7_210  | CTGTTGTGAAGATGGATGCTGT      | CACCTTTCTGTGGCTCTTTCTC   |
| 162 | cgd7_230  | AACAAGGAGTAAGGTGTGACGG      | GGCTACAGCAGGCAATATAGGA   |
| 163 | cgd7_240  | TTAGGGAACTCTTGATGGTGATT     | CTTCAGATGGGAGGATGGATT    |
| 163 | cgd7_250  | GGAAATGTTGGAACCGAGATAA      | GAATGGACTGAAACCAGGAAGA   |
| 163 | cgd7_260  | TGCCAGAGGAAGAAATAAGTG       | TTTAGTGGTGAGGGTTGAGAGG   |
| 163 | cgd7_270  | CAATCTGCAATCCTTGCTTCA       | TATGAAATGTCCAATGCCACTC   |
| 163 | cgd7_280  | TTTAGGAAGTGGAACATACGGG      | ACTCACGAATAGAAGTGGCAGG   |
| 163 | cgd7_290  | TTATCAAGCAGGTTCAATGCC       | TGCCTCCAAATCAATCTCTACTC  |
| 163 | cgd7_300  | ACACAGTTAGGCAGTGGTGTTG      | TCTGCTTTCACAAGACAAGGAA   |
| 163 | cgd7_320  | AAGCCAACAGAGCTTAATCCAC      | TGGCCTTCTTGACCTTATTCA    |
| 163 | cgd7_330  | ACATGGATACAAACATGGAGACA     | GTGGGACTTTGCTGTAGAATGA   |
| 163 | cgd7_340  | AGGCATTATTGAACAGGCTTTG      | TTCCGTAATTCGTGATCGTTT    |
| 163 | cgd7_350  | CTTAGGGATGGGTATTGGGACT      | CCATGAACTGTGTAGGGAGGTT   |
| 163 | cgd7_370  | GACCCAAGTTTGTAAAGGCATC      | TTTCATCGCAATACAGTCCATC   |
| 164 | cgd7_380  | TCTTTGGGACTGGAATAGTCGT      | TAATTTGCCATAAGTTGAGCC    |
| 164 | cgd7_400  | AACCATCTACAATCCCAGAATCA     | GGTTGCATCTACCAATCCATCT   |
| 164 | cgd7_410  | AACAGGAACAGGAACAGGGAC       | TTGCACCTAAATCTACACGTTCTT |
| 164 | cgd7_420  | CGTGTTCAAGCCAAAGTATGAG      | TCTGGTTCACATCCAAGTTCC    |
| 164 | cgd7_450  | TTTGGTTCATACTTCTTCATGTC     | AAGCTCCAATAAATCCTTCAACC  |
| 164 | cgd7_460  | CGATGGAGGGTATTATGGAGATT     | TTCGCATCCTTTACTGAGCTTT   |
| 164 | cgd7_470  | AAATGTCGGTAAATACTGCCCTAA    | ATCTGAACCTAGCGGAATCAAG   |
| 164 | cgd7_480  | GGTCTTATCACCCAGGAACAAA      | GAACATGGAACAACCTGCCTTCT  |
| 164 | cgd7_490  | GTAGCTCTGGCAATACTGGTGA      | TCCTCATCTAGCTTCTGGCTCT   |
| 164 | cgd7_500  | CATGGAAGGTTGGATGATGAC       | GAAATCCCTACTTGGCACTGAA   |
| 164 | cgd7_580  | TTTGAAGGCTCAGTTTCTCTC       | GCTTCTCCAATTTATGAACCCA   |
| 164 | cgd7_630  | CAGTACCAGAGATGCTGGATGA      | CTGGCTCAAATGATGAAACAAA   |
| 165 | cgd7_640  | AATAGTGTCCCGAGATCCAAA       | ATTATCATCCAAAGCTCCAAA    |
| 165 | cgd7_650  | GGACTAAGCACAACGGTAGGAC      | TATAAGGCAAGTTCGTGAGCAA   |
| 165 | cgd7_660  | GCATGGGAACTTACAGGGTTT       | AATGGATGACGTGGCAATAAG    |
| 165 | cgd7_670  | AAGCCGTTGGAGAACTTAGAAA      | AAGGTGAGAATAAGGGCAAGAA   |
| 165 | cgd7_680  | AAATTCTGGCATCAGTGGGTAA      | CATGATCTTCTGGTCTTGCTTG   |
| 165 | cgd7_690  | TGAGGAAACCTACTATGAAGAGGAA   | GCTTACTGCTGGCTTGACC      |

|               |                           |                             |
|---------------|---------------------------|-----------------------------|
| 165 cgd7_700  | CAATAATAAAGCAAGTGTGTGGAGA | AATTCCTTCTCTCTAAGTTTACCCAA  |
| 165 cgd7_720  | CCCAATTAGAGGAGATGAAGAATG  | ACGTCCCTTTGAAGTTGTCTTG      |
| 165 cgd7_730  | TCCCTCAATCCAACATTACAAA    | CAGTTCCCACACACAAATTCTC      |
| 165 cgd7_740  | GGAGAAGAAAGACGAAGCTGAA    | CAGATATTGCTGATCCCATGAA      |
| 165 cgd7_750  | GAGATGATATTGGTGGATGGAAA   | TGAAGAAAGCACAAACTCCAAG      |
| 165 cgd7_760  | GCTGATGGAGAGATTGAGAGGT    | TTTGCTTTGCTTGTTGTTGTCT      |
| 166 cgd7_770  | TTTATTATTGGAGAGCCTTGGG    | TCCCATCGAGAGATTCCATAGT      |
| 166 cgd7_780  | TTCTTCCATTACCATTATCCC     | AGTTTGGAGTGCGGTATTCTGT      |
| 166 cgd7_790  | ACTAGAGATGGCAGGCGATAAG    | TCTTCTACATCAACCTCGACAGAA    |
| 166 cgd7_820  | CACTCGTACTGTGGCTGAAATG    | ACTGACGCAAGAGAGGAATTGT      |
| 166 cgd7_830  | TTTATGAGGTGGAACAGGAACA    | GATGCCTAAATTCGACTCCTTC      |
| 166 cgd7_840  | AAGCCAGAGAGAATGATAAAGGG   | TGCCTGAATACAAATCTCGAATAA    |
| 166 cgd7_860  | TTATAGATGACGTGGCATTGGA    | GCAATCTGTTGATGATTTGGTG      |
| 166 cgd7_880  | GTTGTTCCACCAGAAGAAGGTC    | AACTTTAGGAGAGCCATCAATCC     |
| 166 cgd7_900  | CACTCAACCAATCCCAAGAA      | GATGATGATGAGGAAGAGGAGG      |
| 166 cgd7_910  | GCACATAGTTCAATGGTTGGTG    | TTGCTAAGAATGGTCTAGTGGGA     |
| 166 cgd7_920  | CCTGAGAGTAAGGACGAGAAACA   | TAATGTTCCAAGACAATGCCAA      |
| 166 cgd7_930  | TTTAACCAAACGCACCTTTCTTG   | TAATCCCTCGTCAATCCCTT        |
| 167 cgd7_940  | ACTTGTTTCGTAATCTGCGCTTT   | TATTCACAAATCCGAATCCTC       |
| 167 cgd7_950  | CAACTCTTCTTTGCTGGTGTG     | GTTGTTGGACTAAATGCCTTCC      |
| 167 cgd7_960  | CCTTCGGATTTATCTTCTGGTTT   | TTCTCCCGTCTCTTCTGGATT       |
| 167 cgd7_970  | AGCTTTGGTTTCTGGTCACTCT    | AGAGGATTCTGTTTGCTCCATT      |
| 167 cgd7_980  | TGCATTAGCACCAGAAATACCA    | TAACCATACATCCCAACGACA       |
| 167 cgd7_1000 | GTTCTGACCAGATTACAATAAATGA | ATACTTTCTCGATCCACTGCCT      |
| 167 cgd7_1010 | TGGATGAAGAAGGGAAAGAAGA    | TTTGTCTTATGAAATGCCTCCC      |
| 167 cgd7_1020 | TACTGTTTGGATCACGGGTATG    | TCAATATCTTACCATCGTCTTGT     |
| 167 cgd7_1090 | TTCGTAGCTTACAGACCTTCTCAA  | GATTTCCCGTAGTTTCATGTCC      |
| 167 cgd7_1110 | CGCAAATTAGGTCTCCAATCTC    | GGAATTAGAATGTGAACGGGAA      |
| 167 cgd7_1150 | CTCCAAATATCTCAAGAGGAGCA   | CCTTTCTAATATCCATCCCAACTCT   |
| 167 cgd7_1160 | AATGGCGTTTCTTCTACTCAGG    | ACTGAACCTTCTTGATTCCCAA      |
| 168 cgd7_1180 | TGAACCACAAACACTTTCATCC    | AGTTCCTCAATCTCCCATTCTC      |
| 168 cgd7_1190 | CTCTTCTCTTCTCTTCTCTCC     | ACCTCCGTTTAAGAATGACCAA      |
| 168 cgd7_1200 | AGGAGGAAGAGGAGAAGGAGAA    | ATTGTGGAGAAGATAAGCCGAA      |
| 168 cgd7_1220 | ATGTACCCAGTCATGGCAAATC    | TGACCAATTACAGACCCTCTCTC     |
| 168 cgd7_1230 | AACTGAGGGATTTCCAAGTGTC    | TGCATCAATTTACACCTTCTT       |
| 168 cgd7_1240 | TGGGTAGAACAACCTCAACAA     | GAAACCGCACATATAAACCACA      |
| 168 cgd7_1250 | TGCGTACAGAAACTGGCAA       | GTTACACCACCATAAGTAGTCCACC   |
| 168 cgd7_1260 | TAATCAAGCTCAACCTCAAGCA    | ACTTCGTCCACACTAGCAAACA      |
| 168 cgd7_1270 | GGTAAGATGGTAGTGCCTGGTC    | ATTTCTTGGTTGTTGATTTGG       |
| 168 cgd7_1280 | GTATGTTCCGGTCTCGGAAAGAG   | GAACCTTCGTTTGAGGAATCAC      |
| 168 cgd7_1290 | TTCCAGAAGGTGGAGAAAGATG    | GAGCTTGGTCTGCTACAATTCC      |
| 168 cgd7_1300 | GGTGTGTCTATGAACTCGGAAAG   | GAAAGTCGTTGTTTCTTCCATC      |
| 169 cgd7_1320 | TCTGTGGATTCTTGGTCAGTAGG   | CATTATTGTCCCAACCTGGAAA      |
| 169 cgd7_1350 | CTACAAGACAAAGCCAACCCAG    | CCGGAATAGCATGATTAAGGG       |
| 169 cgd7_1370 | AAGGGTTTCAAGTGGTTCTTCA    | TTGTCTTCTGCTTGTTTGTGGT      |
| 169 cgd7_1380 | TGGGTGAAGAAGGTATTCCAAG    | GGTAGAAATCCAACAAGACTCCC     |
| 169 cgd7_1390 | AGGAAGAAGCTGCATTTAGAAAGA  | TGGATGAGCAAACAACCAATAA      |
| 169 cgd7_1400 | ACCGGGATCAGTATCAAGTAAATC  | TAATATCAGTGCCGCTTGTC        |
| 169 cgd7_1410 | AGTCTTTGATTGGGCTCGTAAA    | ATTCTGTTCCAGTTTGGTGGAG      |
| 169 cgd7_1420 | ACAGCTCAATCTTGCTTTACGA    | TTTCAGCCAATTCTATCCCTCT      |
| 169 cgd7_1430 | TCTCCAAGAAGAAATAGGAAGGG   | GGAGTATCCAAATGAGCGAAAG      |
| 169 cgd7_1440 | GGTAGAGTTGAATTTGGATGGG    | CATTGCGATACCCGATTTATTT      |
| 169 cgd7_1450 | AAGCAAGACTGCAAAGAGGATT    | ACTGATATGTATGCGGATGCTG      |
| 169 cgd7_1460 | TATTGAACCCAGATCCCAGAGT    | AAGTTTGCATCTTCCACCTGTT      |
| 170 cgd7_1470 | GGTTCCAAAGAATCCTCCATT     | TGTGCAAACCTCTCCAACCTTAC     |
| 170 cgd7_1480 | TTTGGGAACATGGGTTATTGA     | GGTCAGAAAGAATAGTTAGAGGTGAAA |
| 170 cgd7_1490 | AAGATGAGTGCAAGTGCCAAA     | ATTGCCATGAGACATCAACATC      |
| 170 cgd7_1500 | GGAAAGAAGAAACAAGGCTCAA    | ATCACCCAGAAATGCCTGTAA       |
| 170 cgd7_1510 | ACGCAACCAATCACAAAGTATCA   | AGGGAAACATGGAACAAATCCT      |

|               |                            |                            |
|---------------|----------------------------|----------------------------|
| 170 cgd7_1540 | TCACCCATAGCCTGTAAACTCA     | CCCAAGCTGTCTATATTGCTCC     |
| 170 cgd7_1550 | CTCCAATACAATCAGGAGACCC     | TGGCTGGTACAAACATCACTTT     |
| 170 cgd7_1580 | GCTAAAGAACTTGGTATTCTCCA    | CGGTTGGATCTAGGGTATGAAA     |
| 170 cgd7_1610 | TACAAGAGCAAGGAGTTGGAGG     | GGAGCCAATAGAGAACCCATTT     |
| 170 cgd7_1630 | TATTTGTTCTGGTGATGGGACA     | GGATTTAGGCTGCATGTTGAGT     |
| 170 cgd7_1640 | ATAGACGCCGACAGATTCAAAG     | GAACCCTGAAGACCAACAAAGA     |
| 170 cgd7_1650 | TAGCAGAAGACCAAGGAACCA      | CATGGAACCAACTACAAGCATC     |
| 171 cgd7_1670 | ATTGTGCTTCAATCTGTCTCCA     | TGTTCAAGGCCCATCTTAGTTT     |
| 171 cgd7_1680 | TGTTGTTCTGGGAAATAAGTTGG    | GCATCTACGTTTCGTTGCATTT     |
| 171 cgd7_1690 | AATCACAACAGGAAGTGAGCAG     | ACAGACTTTCCATTACCTCCA      |
| 171 cgd7_1700 | GAACAGAATCCTTTGCTCTTTACATC | TGAAGTCTGAACCTCTCTGCTTG    |
| 171 cgd7_1710 | GACTTTGGGATGCAACTAGACC     | ATGTGATGAAGAGTGCCAGAAA     |
| 171 cgd7_1720 | TCTTCCAGAGGATACATGGGTAA    | GAAAGAAAGGCTGCTACAAGGA     |
| 171 cgd7_1730 | AATATGGGAAATAGCGAGTGGA     | CCTGGATTTGAGTTTCTCTTGG     |
| 171 cgd7_1750 | GCAAGAATTGACTTGGATAGTGG    | TTCTGGAATTATCTCGTCTGGG     |
| 171 cgd7_1760 | TAACCTCGCTTGGCATACTTT      | GGCTGCTCCTACTATTGACTGG     |
| 171 cgd7_1770 | CAAGGATCTGGATGGAATTGTT     | GAAACACCTGGATGGTCACAC      |
| 171 cgd7_1780 | GATCAGGGAGGCATTATCAGAC     | ATGCGCTGTAACCAAAGAACT      |
| 171 cgd7_1790 | TGAAACAAGATATTCCTGGGCT     | TAAAGCTGTTACAAGGCTCAA      |
| 172 cgd7_1800 | CTTCGACTTGTGTTGGGTATGA     | GATTTGGACAGGTTCTTCTTGG     |
| 172 cgd7_1810 | TACAGGTAAAGGCCCAAACAAG     | CCAACCCGCTAGAAGAGTAATG     |
| 172 cgd7_1820 | TTCCTCCTTGCTATTCATCTTCA    | CTTCCTCGTCATCATCAAAA       |
| 172 cgd7_1830 | GACTTTGGAACTTCGTGTGTG      | CAGGATAACACCCTTCTCTTGG     |
| 172 cgd7_1840 | AACACCTCCGCTAATGTTGAGT     | GGTTCCTTCTGGACAGCTATTT     |
| 172 cgd7_1850 | TTATGGAGGCAGCAAGGTTATT     | ATTGTTTGGGTAATGCTTGGAG     |
| 172 cgd7_1860 | GAAACAGAGATATGCCCTTACAAGAA | AATGGCTACCAATCCGAAGG       |
| 172 cgd7_1880 | AGATCGTCTTGAGATTGGAGTGT    | ACTGGACCTCCCTTCTCTTCT      |
| 172 cgd7_1890 | AGCTTGGCAGACATTTCAAGT      | GATGAATACTTACCAGGCGGAC     |
| 172 cgd7_1900 | AAAGGCTATTGTGGTTGATGAGA    | CGAAGGACGACTTTAGAGCATT     |
| 172 cgd7_1920 | TTTCTGGGTTTACTACAAGATGA    | ATTAGGCAGATGCAAATAGATTGA   |
| 172 cgd7_1930 | TTCAACTCTTCCAACAGCATC      | TCGACCCTCTCAAATGATACAA     |
| 173 cgd7_1940 | AGATCAAGCCAAATACCTCCAA     | GCGTAAGCTGTGTTCTTAAACC     |
| 173 cgd7_1950 | TTGTAGAAGGAAGGAAGCCAAA     | CACGAAACCTTAGTCAAGCCA      |
| 173 cgd7_1960 | GCCTGTTGTTCTGATAAGTTGCT    | TGTTCCAATGTCTGATGACTCC     |
| 173 cgd7_1970 | AAACAAAGAGTCGGTTGGATGT     | TTCAGCTTTCTCATCTTGTGGA     |
| 173 cgd7_1980 | TCAAACACCTTTACAACCCAGA     | CCACTTCTCGATCAATCATATCC    |
| 173 cgd7_1990 | TGTCGTGCGTAGGATTAAGAGA     | TGCCATCCGTTCTAAGTATG       |
| 173 cgd7_2000 | TCTCCAATAGATTCGCAAGACA     | TGAACACCAAATAATGAGACCAA    |
| 173 cgd7_2010 | ACCCTCCTCTGCATCTTACTGA     | CATCACATTGCCTTGAATGACT     |
| 173 cgd7_2020 | CTTAACACAAATTCCTCCAGCC     | GGTCGTCTCTGTGGAAATCAG      |
| 173 cgd7_2030 | CCTCTTGCAGTTCTCCATCATT     | GTAGTGCAGACAACAATCCGTG     |
| 173 cgd7_2040 | CATTGGAAGTCCGGTTATTGTT     | CTAATGAAGGTATCTCCGTGGTTT   |
| 173 cgd7_2050 | ACTGGCACTGGGAAGAGAAAAG     | TTACCGAAATAGACGCTTACC      |
| 174 cgd7_2070 | AGGAGAATGTTGGAAGAGATGG     | TTAGATTTGAATGGCGGAAAGT     |
| 174 cgd7_2080 | TGATACAGGATTATTTGGGATTCA   | TAGCTCTTCAAGCTCCCTTTC      |
| 174 cgd7_2090 | AATGGTGGCATCTGAAGTGTATT    | CTAATTCAACAACCTCGCCTTC     |
| 174 cgd7_2100 | ATCTCTCCCAAGCGAAGTATTG     | CCAGTAAATGCAAAGACTCATCC    |
| 174 cgd7_2110 | TTTCAAGGCTAAGGTTTCCAAG     | TTCTACAGCAATCATCAGCTCC     |
| 174 cgd7_2120 | TTAATGAGGGTATCCAGACAAC     | AGTATCCTTCCCATCAAAGCC      |
| 174 cgd7_2130 | TGGTGGGATAGAAGAGTATGGG     | GAACGCTTAGAACTTTGTCCGT     |
| 174 cgd7_2140 | GCTATTGCGAAAGAATCAAGAAA    | ATAAAGGTGGCCTAGAGGGAGT     |
| 174 cgd7_2160 | CTACAAGAAGCGAATTGAGGATTT   | TAGGCTCTTCAAGGCTCCATAAC    |
| 174 cgd7_2170 | TTGAGGAGCTGATGAAGTCAA      | GGCCTTTATTGTGTGAATAGCC     |
| 174 cgd7_2190 | CCTCTAAGCAAGCAATAGAAGACA   | GTCCATTTGAGACTTTGGAAGAA    |
| 174 cgd7_2200 | ACACTCTTTGTTACCGATGCTG     | TGGGCTCTACTTCTTGAGATACATT  |
| 175 cgd7_2210 | AATGGGAAATGGAACAAAGAGAG    | CAATCTTACCAATCTTCTTATCTGGG |
| 175 cgd7_2260 | CCAAGGCAAGATTTACTTACAGG    | GTTACCTTTACTACATACCAATAGCA |
| 175 cgd7_2270 | CCTGCAACTTACCACAATCT       | ATCACCAATTCCTCATTGAC       |
| 175 cgd7_2280 | AGACTTAGAGGCGGTGTAATTGAG   | AGCTTCTTCTTGGACGGATTT      |

|               |                             |                           |
|---------------|-----------------------------|---------------------------|
| 175 cgd7_2290 | AGTAGATGCCCGCAATGATAGT      | TATCGAGTAGGATGTGGAAGGG    |
| 175 cgd7_2300 | CATTCGTGAAGAGAAGCGAGT       | CAGCATCAGTTGGTAGTGCTAAA   |
| 175 cgd7_2310 | TGCAAGCATTATGGAGATTGT       | TCACTTTCATCACTGGCTGTTT    |
| 175 cgd7_2320 | ATGTCTTCATTTCTCCAAATATCC    | CCCCTCTCTGCACTCTTGTTT     |
| 175 cgd7_2330 | AGCAACTCACGTACCCACTCTAC     | TTCCAAATTCTCCTTGCAGTTT    |
| 175 cgd7_2340 | CAGGCAGGAGTATATGAAAGCA      | TCGTCAGGTTTCCAAGTATCAA    |
| 175 cgd7_2360 | GCCAAAGTATTTCTCCAAACTTCA    | CATACGAGCCGGGATACAAA      |
| 175 cgd7_2370 | CAATGGATGAAGGGATTATTTGA     | TTAATGAGGAATCAGCCGAAGT    |
| 176 cgd7_2380 | CTTTCAATGTTCACTACTTTCCC     | CCTCCGAATTTACTGATTCCAC    |
| 176 cgd7_2400 | TTTCTTTATGGCAAAGGTGTTGT     | CAATCACTGTATCTCCGGGTTT    |
| 176 cgd7_2410 | TTAATATGCGAAAGAGTAGACACCC   | ATCCATTTGCTCCATGAAACTC    |
| 176 cgd7_2430 | CAAATGTATGTCCTATGCCCAA      | ATGATTGTTATCCAATGCTCCA    |
| 176 cgd7_2440 | GATAAGGTCATCGACTCCTCGT      | ACTGGGATATTGTTGGGAGAAA    |
| 176 cgd7_2450 | CACAAATTACGAGCAGGAATGA      | CCAATAGCCAAACAAGAAGGAA    |
| 176 cgd7_2460 | CTGGAAAGGGATCTAAACACGA      | AATTCGCCAACATAAATGGAAA    |
| 176 cgd7_2470 | CAAGTATTGCAGGAACAAACGA      | CTCAACCAAGCGATCTACACAA    |
| 176 cgd7_2480 | GTTCTTGGGCTAAACTTCTTGG      | ATTCGATATGCTGGTCTCCTTT    |
| 176 cgd7_2490 | TACTCCATTTCACTACTCGCA       | TGTAACGCTCAATCTACCTTTGG   |
| 176 cgd7_2500 | TGTGAGTGGGATGAAGAGTTTG      | GGTAATTCGCTGCCTAAGAAATAA  |
| 176 cgd7_2510 | ACTACTGTCAACGCAACTCTGG      | GCGCAGCAAATGTTAATAGAGA    |
| 177 cgd7_2520 | TGCTTTATCATTTGAGAGTCGG      | AAACATCTTCATCTTCAGCATCAG  |
| 177 cgd7_2530 | CTAAGGATTGTTTGGGAGTTGG      | GCCCTTCTGATGTATGGGATAA    |
| 177 cgd7_2550 | AATTCATACGAGCGATGGAGTAA     | CCCTTATCTGCCAAACTCAAAG    |
| 177 cgd7_2560 | AGAGAAGGCATAATTGAGAGACAGTT  | TTGAATTGGAGCTTGTTTCCTT    |
| 177 cgd7_2570 | TGGAAGGCAAACCTACTAAACC      | TGTCACCACTATCATCTGCTCC    |
| 177 cgd7_2580 | GACAATTTCTTCGTCCAGGGT       | TCCTTTATTCTCGTGGTCTGCT    |
| 177 cgd7_2590 | TTCTCGCAATTCTAGGTATTCACTT   | TTTCAACTTTGCCATTACAATCA   |
| 177 cgd7_2600 | TTATTGCTGAGACCAACGGAG       | GTATAGATGTTTGGGTGGCGAG    |
| 177 cgd7_2610 | TTAACTGAAGGAAAGGCAAAGG      | GGGTTGTTGTAGGAGATGGAAG    |
| 177 cgd7_2620 | AAACTCTGGCAAGGAAACACTT      | TCACCAATTACAGGTTGAGATGA   |
| 177 cgd7_2640 | AGTCTTGATTGAGAGGCTTGACTT    | GACGCCTTTGCTAAATTCTCTT    |
| 177 cgd7_2670 | AATATCAGGAACTGCGAATGGT      | ATTCCGCGTATCTCTTTCTCTG    |
| 178 cgd7_3780 | GTACCGCTGTTTCAGGTAGGAC      | CGATGGTCGAAAGTAATCACAA    |
| 178 cgd7_3790 | GCGAAGTGTATTGTTCAAGCAG      | GGAGGTGTATGGGACTAAACCA    |
| 178 cgd7_3800 | GATTCCTGATGGAGACTTGTTT      | AAAGCGAGATGTTCTTTCCACT    |
| 178 cgd7_3810 | TCATAAATATCCTTGCTCGCCT      | TGCTTCCGTACATGCTGACTT     |
| 178 cgd7_3820 | GTTGACGAGATGGCTGATACAA      | GAATATGCTCCCTAAATGCCCT    |
| 178 cgd7_3830 | GGCACTCAAAGCCTCTACTTTC      | GCCAACAACAGAAACAATACCTC   |
| 178 cgd7_3840 | GAATTGGTGGGCTGTTAGTTTC      | AGAGCAGAGTTGTGGAAGATTG    |
| 178 cgd7_3850 | ACGACTCTTCACTTGGCTGTTG      | CGGATGCTCTTTCTAATTGGGT    |
| 178 cgd7_3860 | TAGGGAACAAGAATGGGAGAGA      | GGCTCTGTATTTGTCGGTTTGT    |
| 178 cgd7_3870 | AAGAGCTTTCAAGTTTGCATGAG     | TTTGCCCTTATCAACTCCTTTG    |
| 178 cgd7_3880 | TGAACAGGATATTGTCGTTGGA      | TTTGTGTTGGGAAATAAGGAGA    |
| 178 cgd7_3900 | ATTGATGTAGATAAGGCGGAGG      | GTTGAGTCTTCTTCTGCTCCAGT   |
| 179 cgd7_3910 | CGCAGTCCTACTCAAATCTCC       | TTTCTGCATTCTTCTTCGTCAA    |
| 179 cgd7_3920 | GTGAACGTATAATGAATAAAGAGCGA  | TACTTCCTCTCCAATGCAACT     |
| 179 cgd7_3930 | AGGAAGTAAATATGCTAAATGCAAAGA | TTAAACTCCAAAGCCTCATCAA    |
| 179 cgd7_3940 | TCAAAGACGAGCAATAGTTCCA      | AATCTCCAAAGCACCCACAG      |
| 179 cgd7_3950 | CACACGAAGCACTCAAGCTATT      | GTTTGTCTTTCCCTCTCCCTTT    |
| 179 cgd7_3960 | ATCAAGTTAGCAAATCCATGCC      | ATAACGGTGCTTCAGTATTTCCA   |
| 179 cgd7_3980 | ATTATATCCGGTGGGAACTTGA      | TTTGTATTAGGTATGGCGGCT     |
| 179 cgd7_3990 | AAGGGCAAAGTATCCAAACAGA      | AACCAACATATTCATTGGGACTAAA |
| 179 cgd7_4010 | AACGATGACCAACCATCCTATC      | CCTTAATCTTTCCTTCGCCTTT    |
| 179 cgd7_4020 | ATCTATTCCTCCAAGCGTACCA      | CATTATTGGGTTCAAGTCACCA    |
| 179 cgd7_4030 | ACATTGCCACAAGGAATAGGAC      | CTTTGCTCCATTACAGACTCCC    |
| 179 cgd7_4040 | AGTTGGGTCAATCTGGGATG        | GTAAACTACGGAAAGGAGCGAC    |
| 180 cgd7_4050 | GCCAATCCAAATTACAGACTTGA     | ACTCCAACCTCTTTCCTTCTCT    |
| 180 cgd7_4070 | AGATTGTGATCTTGAACCCTCGT     | CCAACCTAGACGCTATGGAACA    |
| 180 cgd7_4080 | TGGAAGTATGGCAGATGGAAG       | TGCAGGGAACATTAACAAAGTG    |

|     |           |                            |                             |
|-----|-----------|----------------------------|-----------------------------|
| 180 | cgd7_4100 | AATTGGTCAGATTGTGGTTTCC     | TTGAGCATGAGCCCTACTAACA      |
| 180 | cgd7_4110 | AGGCTTTCTTGAGACTGAGGGT     | CAAGCATTGAAATATGCCCTTT      |
| 180 | cgd7_4120 | CTAAGATCATGGAATTGTGGTGG    | TGCTTGGTTGGCTCATCTATC       |
| 180 | cgd7_4130 | TGAGTCTAACACCAACTGCTGAA    | CCATGTTGAGGTAATCCGCT        |
| 180 | cgd7_4140 | TTGGTTGTAGGTACTGTCCGGG     | CGTCTCCACATGCAATAAAGTC      |
| 180 | cgd7_4150 | CCTGAATATCTCTGCTGCTCCT     | TTGGGTACTGTGCTTGATTCTG      |
| 180 | cgd7_4160 | CAAAGCATTCAACGAGAAACTG     | GTGCATCTTCCAAGGGTATGA       |
| 180 | cgd7_4170 | TGTTTGGCTATCTCGTTTCTTG     | CACGTTAATTCTGGTGGATTG       |
| 180 | cgd7_4180 | ACAGATGGGAACAGAATAGCGT     | AAAGCATTTACCAACAAACAA       |
| 180 | cgd7_4190 | AAAGAAGGCTCAAGGACATCAA     | AACACTCATGGACTTTCGGTCT      |
| 181 | cgd7_4200 | CTTGGGTTCCATTAAGCTCATC     | TTGAAGAATACGAGAGATGGTGC     |
| 181 | cgd7_4210 | CAGAGTGCTCAAGAGTTTGCC      | AATGAATCCCATCAGGAAGAAA      |
| 181 | cgd7_4220 | AAATCCAACATCCAACAGCTTC     | CCAAATCTATCCCTTCGCATAA      |
| 181 | cgd7_4230 | GAGATTTCTTGGAGCGATAGGTT    | ATTCCTCTTTCAGGATTTGAG       |
| 181 | cgd7_4240 | GTCTCTCCCAAAGCAATTTAG      | CTTAGTCCCAGTCGTGGTGT        |
| 181 | cgd7_4250 | ATGATCGCCATTTGACTATTT      | TGCAGTTCTCAAGTATCTCGCT      |
| 181 | cgd7_4260 | TGAGTTGATGAGAGGCAAAGAA     | TCTTCCATAGTTCTGGTGTGA       |
| 181 | cgd7_4280 | TAACATCAAGCCCTCCTTCATT     | GTACCTTCTCATCCCATGCTTC      |
| 181 | cgd7_4290 | CAAAGACTATCAGCAAAGCCAA     | CCATTCCCAGGATAAATAACGA      |
| 181 | cgd7_4300 | TTTATTTAGAGCAAAGAAGAAGTCCC | ACTGCTGTTCAAGAAGCGAAC       |
| 181 | cgd7_4310 | TTACAAACACCACAGGCAGTTC     | TTGCGATACATTTCAAGGACAA      |
| 181 | cgd7_4320 | ATGAAGTAAATCCCGAAGCAAA     | AAATTATCCAAGATTGAAACAGATGAA |
| 182 | cgd7_4330 | ATTGGTCTGAGCGGAGATAGAA     | CTGTACCCAGAATGAATAGCCC      |
| 182 | cgd7_4340 | TGGAGACAATTCAGAGCAAGA      | GCAATTTATGGGACAGCCTAAC      |
| 182 | cgd7_4350 | CAAACCATATCTTCGGGATCAG     | TTTCTACCGCTATCCAACCATC      |
| 182 | cgd7_4370 | TTGAAGATCATACTTGAAACC      | GCTCTAATGGGTGAGGTACTTTG     |
| 182 | cgd7_4380 | TTTGCTACAAGAACAGTGCCTC     | ATACACCAATAATGCACCCACA      |
| 182 | cgd7_4390 | TTAGATCCAGAAACCAGAGCTACA   | CGGATGAGCTGCCTTAAACT        |
| 182 | cgd7_4400 | AGCCTGTTTCATTTATTGTGCC     | TCTTGAACATATTGCTCTGCGT      |
| 182 | cgd7_4420 | CAGATATGGTTGCTGGAATTGA     | TTCAACAGGAATAAAGGTGGCT      |
| 182 | cgd7_4440 | GGCTAAGGCAATGGAAGAAGT      | GTCTGTTTGATCCTGCTCTGTG      |
| 182 | cgd7_4470 | TTATAGATGGTTCCTGTCTCCTCA   | AAGTGTTCCTGTTCTGTTCCAAGT    |
| 182 | cgd7_4480 | TGGGAGATCAAGAGGTTATGGA     | TATAGTGGATGTGAGGCGTTGA      |
| 182 | cgd7_4490 | CTGAAGGAATCTCCAAATCCAA     | TATCATCACATCCAAATCCAA       |
| 183 | cgd7_4500 | CCAAGACCACAACCACTACAAA     | CCTAAGACGAAAGATGGGAATG      |
| 183 | cgd7_4520 | ACCCTGAATGGTATGCTCAAGT     | CTAATTCTTTGTCGTTGGCCTC      |
| 183 | cgd7_4530 | AAGAAATGGGACACTCCAGAAA     | TCTCTAATGGAACTGGTGCCT       |
| 183 | cgd7_4540 | CGATGAACACTCCCTAACCTCT     | CCATCTCCAGAAAGCGAAATAC      |
| 183 | cgd7_4560 | AACTTTGGGTGTTCTCCACT       | CTGAATCCACATCTTTGTTCCA      |
| 183 | cgd7_4570 | TGAGGAGGAAGAGGCTTTAGTG     | GATATTTGGACCTTTGGCGTT       |
| 183 | cgd7_4580 | AGGAAGTAATCAGAAGGGAGGG     | TCCTGAACATCATCCAATACCA      |
| 183 | cgd7_4590 | CGAAGAAGGGTACGATTTGAAG     | AGCATTGAGGATCGTAAGAAC       |
| 183 | cgd7_4600 | TAGAATTGGGAGAACAGGGAGA     | CCTGAAGGGAAGTATTTGTGCT      |
| 183 | cgd7_4610 | TTCAACCTACCACCCTCAGAA      | CTGGCTGTGATGCTGACTTTAC      |
| 183 | cgd7_4620 | TCTCTCGGACCAAACCTACCACT    | AAAGCTACGGCTCTGATTGTTT      |
| 183 | cgd7_4630 | AGTAATTGGCGGAGTTATGGTG     | TGAAGCAGACGAAGAAATACCC      |
| 184 | cgd7_4640 | TATATTTGTGTTGCGGATGGAG     | AACTCGCATTTCTGTTCCCTT       |
| 184 | cgd7_4650 | GGTTAAGAAGGCAGTGATACCAA    | TTATTCCGTCTACATCCAAGCC      |
| 184 | cgd7_4660 | CAGATTCATTAACCGAGAAGCC     | TTTCATCTTCCAATCCAATCC       |
| 184 | cgd7_4670 | GAGGAAATCGAGGAAGAGGTTT     | TTGAGACGAAATTGAGCTTGG       |
| 184 | cgd7_4680 | TCAAATGGTGAACAAATGAGG      | GACTCTCCTCGTCCCAAGTAAA      |
| 184 | cgd7_4690 | TTAGGCATCTAGGCTCCTCAAC     | GAAGGCATTTGTCATGGTTTCT      |
| 184 | cgd7_4700 | ATTCAGATGCCAAGAGTTTGATT    | TGTTCTGTTTGGTCTCACAGATT     |
| 184 | cgd7_4710 | AGAGGAATGATGGGAGTTCAAG     | TATCAGACACAGAGGAAGCGAC      |
| 184 | cgd7_4720 | CGCTTTCGTCATATCGTTCA       | GGACAACCTACACAAGCCATTCA     |
| 184 | cgd7_4730 | TTTATCTAAGGGTGCTTCCCAG     | CACTTGCTGCTGGATCTGTATT      |
| 184 | cgd7_4740 | CTCCCAAGATGGAGACTACTGG     | TGAATGTTCTGGGTTGTTTGAG      |
| 184 | cgd7_4750 | TTAATTTGCCCAACTCCCAG       | AGTACAAGTTTCTCGTTCTCCC      |
| 185 | cgd7_4760 | ATTTCTGATTTGCCTTGAAACC     | ACTGAGCACCCATCTTCTCTC       |

|               |                          |                            |
|---------------|--------------------------|----------------------------|
| 185 cgd7_4790 | CAGGTAATTTCTCTCCATCCCA   | TTCGACTTCTATTTCTGCCTCC     |
| 185 cgd7_4810 | CAACTCAACAAGCACCAACTTC   | TGGCTCAACATAACACCACTCT     |
| 185 cgd7_4820 | CTTTGAGGAATTTGAACATGGG   | CTCTGCTAACCTCTCTTGGCAC     |
| 185 cgd7_4830 | CTAAACTGCGCCCTCATATTGT   | TGGAATCTCCCTTATTCATTGG     |
| 185 cgd7_4840 | GCTCCAAGGGAACAAGAGAAG    | CGTCTTTATCAACCTCAACATCAA   |
| 185 cgd7_4860 | CCCTCTCTCTTGAACCTGAAAC   | AAATTCCAGCTCTTCCTCTGG      |
| 185 cgd7_4880 | CTTCTGATGATTTGGAGATTGAAG | TTGTGGAAGTTTCTGTTGGTGT     |
| 185 cgd7_4900 | GATACGGTGGATGGAGTTATTAGG | CGCCTTTCTCTTTGTCTTCATT     |
| 185 cgd7_4910 | CATGTTGCCATCCAATACAAC    | CTGTCCAAGAAAGGAAGAATGG     |
| 185 cgd7_4920 | TCAGGAGAAAGAAATGGAGACC   | GCGACATTATTACGAGCATCAA     |
| 185 cgd7_4930 | TATGGAAGCATCGGAATATCAA   | TTCTGCTGTATGACCTCCTGAA     |
| 186 cgd7_4940 | TGCAATTCACTGGAGACTTTGT   | CAAACATCATTCTCACCTTCCA     |
| 186 cgd7_4950 | GTTTCTGGGACTAGGTTTGGTG   | TGTCCGTTCTTCCGTTTCATAG     |
| 186 cgd7_4960 | ATTCAGTTCAATCAGGCACAAA   | CCTTCACAAGTCTCCTCAATCA     |
| 186 cgd7_4970 | TTGATTGTGACGGATGGATAAG   | TTCTGGCATAAGTAAATCGTTC     |
| 186 cgd7_4980 | CTGGTGGAAATGGGTTTCTTTAC  | GCTCCTCCTGGTTAATTCTCA      |
| 186 cgd7_5000 | GGAGGAACTTGTGCTATTCCAG   | GACTCCTTCTTTCCATCAACCA     |
| 186 cgd7_5010 | GAGGAGGAGGAGGAAGAAGAAC   | TATATTTGGAAGGAGGCTTTGG     |
| 186 cgd7_5020 | TGCAAATCTTGGTAACTTGCTC   | CATGCCTCAGTATCAGTAAACCC    |
| 186 cgd7_5030 | TCTTCCTCCATTTATTCTCCA    | TTGGCCTATCTGGTTTCATCTT     |
| 186 cgd7_5040 | GCTCAAGTTCAAGCTCTTACCC   | AACTCAGACCCTTTCCATCTTG     |
| 186 cgd7_5050 | AAAGAAGGGAACGAGGAAGAAA   | TTCGTGGTAGAAATGGGATTGT     |
| 186 cgd7_5060 | GCTGTAATGAAGCCAACAGACA   | AAATCAGCACATACACGCTCAA     |
| 187 cgd7_5080 | TTCCTCAAATCCAATCAAGAGA   | GGGAGAAGAGGTCCAGGTAGTT     |
| 187 cgd7_5090 | TCATAGCAAAGGAGGAAATACAGA | AGAGCCTTCCGATCTCAAATAA     |
| 187 cgd7_5100 | GCCAACCTTGCATAGATACAGAA  | TGGATGGAATAGAAGTGGAGTAGAA  |
| 187 cgd7_5110 | ACCAAGAACCTAACAACGGGAA   | CCATTCAACTCATAAATCTGGCT    |
| 187 cgd7_5120 | TTGGATGTTGTTGGAGATATGAA  | CGTAAGTAATGGAGATTGGTGAGA   |
| 187 cgd7_5130 | TGATGAAATAATGAGAAAGCCAAA | TCAAAGTTGGTATCAGGGCTAAA    |
| 187 cgd7_5140 | ACTCGCTGGAAGTAATGTTGGT   | CTCCTCACCTTTGGTGTAGTC      |
| 187 cgd7_5150 | CCTAAATGCTTACCTGGCTTTG   | ATCCCTCTCTACATCGTGGCT      |
| 187 cgd7_5170 | AAGCAGGAGAACTGCATACATC   | GCCTCTATACCCAGCATCAATC     |
| 187 cgd7_5180 | TTACAACATCCTTCCAGCTTCC   | ACAAGACGCTCCTCTAAATCCA     |
| 187 cgd7_5190 | GCTATCACGTCCCGTACTGTC    | CAGGATTGCTTCCCTAATATAACAA  |
| 187 cgd7_5200 | GAGCTTCACTCTGGTGGTCTTT   | TTTCAGGGTTTACTCGGGTTT      |
| 188 cgd7_5210 | ATTCTATCTCCAAGTCTCCCA    | CAGGAATACCAAGAAATGAGCC     |
| 188 cgd7_5220 | TTAAGGCTCTCAAACCTTAGCGG  | AAACCAACCAATCCATCAACTC     |
| 188 cgd7_5230 | TGTAAAGAATGGATCGAAACCC   | TCTTCTCAAAGCAGCCAGT        |
| 188 cgd7_5240 | TCCTGTCTGATAATGAAGGCAA   | GGACCATAAAGTGAATTGGGAG     |
| 188 cgd7_5250 | TTGAATTAGGTTGTGGTTGTGG   | GACTGCCAAGAAGTGGAGGATT     |
| 188 cgd7_5270 | ATTGAAGTTGTTGGAGGCGA     | ACACGACCCATTGTTTCATCTT     |
| 188 cgd7_5280 | TTGAGCAAGACCTACCAAGTGA   | CTCCTCATCTCCATCGGAAC       |
| 188 cgd7_5300 | TTCTGAGCAAAGCAATACACAAC  | ACAATAAACTCAAGTAAACCAGGCTC |
| 188 cgd7_5310 | TCCTTTAGCACAAACAACAACAA  | CAATTTCTCCTGATCGTCTTC      |
| 188 cgd7_5330 | AAGAACAGGAGGAGGAGGAGTT   | TCCACCAGCCTTATTATTGCT      |
| 188 cgd7_5340 | ACCTCACCTGCATCCTTACTG    | TGCTACCTCTGATTCTTGGCT      |
| 188 cgd7_5350 | TATGTTGGGAATTTGGTAGGGT   | CCAATACAATCGCCACGTAA       |
| 189 cgd7_5360 | CGATGAATGCTATCAACAAGAAA  | GAGCGTCTATAATGCGAATCTG     |
| 189 cgd7_5370 | TAGTTCGAGCAGAAACACCTCA   | CCCTAATCCATGTAACCTCACAG    |
| 189 cgd7_5380 | CGACCATGAACCATTAGAGGA    | AGATGCTTACACATTGATTGGCT    |
| 189 cgd7_5390 | TTTCTCCTAAAGCACTCGAAA    | TCTGACACCACATCATTCTCATC    |
| 189 cgd7_5410 | GGTGAATGATTCTGGCCTATCTC  | CCTTGCCTTCTTGTCTTATTG      |
| 189 cgd7_5420 | TTTGCTTTCAGTGGACCTATCA   | TTAGCCTTGGAAACATCCTCA      |
| 189 cgd7_5440 | GCTCATCGTTTGTCTTATCTTC   | TTGATATTGGACCTCTGGCTTT     |
| 189 cgd7_5450 | GAATGCTCCTTCGCTCACTTT    | TTGACTTTCCTCAATCGCCTC      |
| 189 cgd7_5460 | GTTTGAAGCGGAACATAGAACC   | TTGCCATTTGGAGTTGTTACTG     |
| 189 cgd7_5470 | CTCCATGCTCTGCTCCTTACTC   | GTTTGCCACAGTAGTTTCCACA     |
| 189 cgd7_5480 | TTCCAAGCAACTAGAAGCAGAAC  | ATCTTGACTTTCGCCAGTGATT     |
| 189 cgd7_5490 | GCATGGCTTTGATCCTAATTC    | CTGTTTCAGAGTCCGCTTTCTT     |

|               |                            |                            |
|---------------|----------------------------|----------------------------|
| 190 cgd7_5500 | CAGAGTTACATGGCAATCCTCA     | TTTACATCTACCATTCCGTTGG     |
| 190 cgd7_5510 | AACCAAGATGACGCAGAGAAGT     | ATGCTTGAATCCGAAAGAAATG     |
| 190 cgd7_5520 | TATGGCGGTCTAACTAAGGGAA     | CCATTTATCAAGCCAAGCTCA      |
| 190 cgd8_10   | CGGAACCTATGCAGTATTTAGGG    | CACACATTTGCCATTCTCACTC     |
| 190 cgd8_20   | GCAGGATGAAAGAAGGACAAAG     | GCTTCCCTAAATAATCCCTCCA     |
| 190 cgd8_30   | GATCGAGGAGAGTATCAAGGTCA    | AATCGGTGATGTATCTGTTGGA     |
| 190 cgd8_40   | AAGGATGGCTAATGCTGTGTTT     | ACAAACGTGTCTCTTTCCCACT     |
| 190 cgd8_50   | CGAATGAACAAGAAGTAGTTGCC    | TTGCTAGTTGAAGACCCAGA       |
| 190 cgd8_60   | TCAAAGTACAGCTTCGGGATTT     | AATTCTTTACAAGCCGGTCTCA     |
| 190 cgd8_70   | TAGTTGCGAAATTGATTGCTTG     | CTTCTTGAAAGGATCTTGCGTT     |
| 190 cgd8_80   | GATTAGAGGCAATGGATGTCGT     | TGGAAGTGTCTGTTGTTTCTT      |
| 190 cgd8_90   | CTTCATCTACTGGGAATCAGGG     | ACCTCCTTCGTCATTATCCAAA     |
| 191 cgd8_100  | TAGAGAGGCTTTGGGATTGTGT     | TGATTATTGGATGCAGGAGATG     |
| 191 cgd8_110  | CCAATATCAAGAAGTTTTCGT      | TTTAGGAAATGGTGGGACAAAG     |
| 191 cgd8_150  | AGAGGAGGTGGAACAATGAGAA     | GATCCCTTGAATGACCAATAA      |
| 191 cgd8_160  | CCTTAGCCTTGATGGTGAGAAA     | CGCTGTACTCTAAAGGATGGGA     |
| 191 cgd8_170  | TCCAACAAGAGATGCCAGTAA      | TGACCAGTTTCCAGTGCTAAGA     |
| 191 cgd8_180  | TCAAGCCAGAGAAATACAACCA     | AGACATCTAATCAGCCCAGGAA     |
| 191 cgd8_190  | AATGGAGAGCAGGTCCAAACT      | CATTTCAAGTTCATCGCTTTCA     |
| 191 cgd8_200  | AGAAACGAGGTTGAGAGGAATG     | AACCATATCCAACAAATGGGTC     |
| 191 cgd8_210  | TTCAAGCTGTTATTGATGCTGG     | CGTTTCCATATTGGTGTGCTAA     |
| 191 cgd8_220  | AGCTTGGGCACGTTTGTATT       | TTGAATGGGTCAGAGTTAGAAGG    |
| 191 cgd8_230  | GTTGGAAACAATGAAGGAGGAA     | GTCACATTTGGATCTGCATCAC     |
| 191 cgd8_240  | TTCCACTTTGGGAGGAGTAATG     | CCAACCCTACACACAATGCTAA     |
| 192 cgd8_260  | CAGTAAACCCTAACGCCATACC     | GGCAAAGAGAATATCCATCCAG     |
| 192 cgd8_270  | ATTGCCTAGATGACCAAGAACC     | CCCAGAAGGTGTATTCTCCAA      |
| 192 cgd8_280  | CGAAATTGAAGAGAAGGAGGAA     | CTTAGAACTGTCGGAATTGGCT     |
| 192 cgd8_290  | CTTGGAGATGTTGTTGATAGAGGA   | ATGGTTTCCTAAGAGTCCCACA     |
| 192 cgd8_340  | TACTGCTAATGGATCTTCCCGT     | CCCTGTTTGTGGTTCATTCTTT     |
| 192 cgd8_350  | GAGAACGCAATAAAGAGCAGAAA    | CAAATCCTAAACCAAACCCTGA     |
| 192 cgd8_360  | TTACAGAAGGAATGCGGTGTC      | TGCAAACAATCTTACCATCCAA     |
| 192 cgd8_380  | GAATTGGGATATTGCTCTGACTG    | GCCATAAACTGATGTAGACCCTG    |
| 192 cgd8_410  | TTGTGCTATTACTTGGATGAGGG    | CTTGTGGAAGTGTCTGTTGA       |
| 192 cgd8_420  | CAAAGGATCAGAAGGAACCTCA     | TTCCGTTAATTTCCCTGTTTCA     |
| 192 cgd8_430  | AAACAACCTGAGAGCAAGAAGCC    | TGCATAAAGCTGGTAGGAAACA     |
| 192 cgd8_450  | TTGATCCACCCTGATAAGACAA     | ACTAATTCCTCAGCACGTTTCC     |
| 193 cgd8_470  | TTGGCATTGAGCACTTACTTAGAC   | GTCTGGTTGATTATTCTCTTCATCAG |
| 193 cgd8_480  | AAGATTTGGAGGGATGAACTTG     | AAATACATTGATCTGGCCCTGT     |
| 193 cgd8_490  | GAGGAAGCTGGAAGAACAGAA      | TCAATTTTCGTGGTAATCGCTC     |
| 193 cgd8_510  | TGAAGATTCCACTTCTTGGAGG     | ATTCCATTGCTTGGAGCTGTT      |
| 193 cgd8_590  | TGAGAAGGCAGCATATAAAGGTC    | AGTTCCAAGAAGAAAGTCCATGTC   |
| 193 cgd8_600  | TTTATGGGCATGGTTTGTCTC      | CATTGTAAAGACCCAATTTCTCAA   |
| 193 cgd8_610  | AAGGAGGTGAAGATCGAGATGA     | TTGGACGCTTTAGATTTGCTTT     |
| 193 cgd8_620  | TCAAGTCAATGGAAAGTTATGGAA   | ATATTTGATCCGCCATCCTCT      |
| 193 cgd8_630  | TCACCTAATGCTCAAACCTGTCTC   | GTTGGGTTTCAATACTTTGTTTCA   |
| 193 cgd8_640  | GGTGAATGGAAGATGATGGTT      | TCAATATGCCTCCCAAATTCTC     |
| 193 cgd8_660  | GGAATACCAGGAGGTGTACCAAG    | TGTTGGTTTGTGGAACTGTC       |
| 193 cgd8_710  | TGTTTGGATAAGAGATACCGCC     | TAGCAATAGATTTTCGCAGTCCC    |
| 194 cgd8_730  | GAAGGAGATTATATTGATGCTTTGCT | CCCTTAAATTCAGCTTTCCA       |
| 194 cgd8_740  | ATAGGCTCCCAAATAAGGTTCA     | TTGTTTCAAGGCAATCCTCA       |
| 194 cgd8_770  | TGAGGCCAGAGATATGGAGATT     | TTGCTCCACTTTAGGTTTCCAG     |
| 194 cgd8_780  | AGGAGAATGAGATAAATCAAACGG   | GCAAATGAGAAGTGCATACCAC     |
| 194 cgd8_800  | AAGAGTGCATCATCAATTTCCA     | TTGTATCAGGAATAAGCCCAAGA    |
| 194 cgd8_810  | AAGGAGAAGGAAGAGCTGGATT     | GAGATTGGCTTGAAGTATGGG      |
| 194 cgd8_820  | AATCACTTCCAACCTCCTCCAAA    | ACCTCCGTTCTTCTCCTTCTCT     |
| 194 cgd8_840  | TACATTGGAGAAAAGTGCAGAGAG   | ATCAGCAGAAGTACCTTGGGAG     |
| 194 cgd8_860  | TTAACTTCGACCCACACAGAGA     | AACCCTAAGACCAATTTACCCA     |
| 194 cgd8_880  | CAGCTAGGAAACTCAACAGATGG    | TTTCTGGATATGGATTGCTCCT     |
| 194 cgd8_900  | TCCAGTGTTATGCCTCTAATTCC    | TTAGCTCGTCCATACCTTCAATC    |

|               |                             |                            |
|---------------|-----------------------------|----------------------------|
| 194 cgd8_910  | GCCATTGAAATATCGTCCAGTT      | ACATCCCAACATAAAGCCATTC     |
| 195 cgd8_920  | CAATTAAGGTTCCCATGCTCT       | AAAGCTGATAATGTTGGAGGAAA    |
| 195 cgd8_930  | GCACTTTGGTCATGGGATATTG      | GTTACTGTGCATTCCTCGCTTC     |
| 195 cgd8_950  | TTCCTTCTTCTAGTGGCAAACC      | TTATTTCTGTCAACACATGGACCT   |
| 195 cgd8_1000 | TTGTAAAGGAGTTTGTGTGATGTT    | AGCCACCAAGGAGTAGTCTTCA     |
| 195 cgd8_1010 | CTCAAATTATCGCCATTCAAAC      | GGGAAGGAAGAAATGAGACAGA     |
| 195 cgd8_1020 | GTTGATTTGGGATTTGACCATT      | TTTGTAACTTGCTCCACCTGA      |
| 195 cgd8_1030 | AACTTTGGGAATTAAGGCAGGT      | TGCGGTTTCAGGTCTCATAAA      |
| 195 cgd8_1040 | AAGTTTATAGTAATTGGAGATGCTGGA | TCGATTAGAAGAAGAATAGAGGGAAA |
| 195 cgd8_1050 | ATATTTCGGGAGCATCGAATAG      | TTTGCTTGTCTCCATTCTTCA      |
| 195 cgd8_1060 | TGAGATGGCAGAATCAGAAGAA      | TCCAACAACTCACAAGGAAGA      |
| 195 cgd8_1080 | AATGTAACCAGGCAATTACGG       | TGTCCAGTATCGGGAAAGAGTT     |
| 195 cgd8_1120 | GGTCATTTATTTGTGAGTTTGGG     | CCTCTTCCCTTTCATCATCAC      |
| 196 cgd8_1160 | GCAGTTTCAACAGATCAATCCA      | ATCTCCTCATTTGTAAGCCCAA     |
| 196 cgd8_1170 | GGTATATGTTCCAGAATAAGCCAA    | CTCTATGATGAATTAAGCAGGGAA   |
| 196 cgd8_1180 | CTGCTTATAGACAACAATCCGCT     | GCTGCAACTTTCTTCATACCATT    |
| 196 cgd8_1200 | CAACGGAAGAACAAGGAGAGTT      | TGTTGAAGCACTTGGTAATCTTG    |
| 196 cgd8_1220 | CGACAACGACGAAGATGACTAC      | CCTGCTCAAGTTCTAATTCGCT     |
| 196 cgd8_1230 | AATCTCAAGTAGGTCTTGCTCCTG    | ACTCGAATGTTGGGCTCTTTC      |
| 196 cgd8_1240 | GTTTGAGTTAGGTGGCTCTTCC      | GAGTTCCAATTTCCATTCCATC     |
| 196 cgd8_1260 | TATCTGTCCTTGCGATAAAGCC      | GTGGAAGAGATGTTGACGATGA     |
| 196 cgd8_1270 | CCCACAATCTTACGAACCAGA       | AACCAAAGGAGTTTGACTTGGA     |
| 196 cgd8_1290 | GGAGGAGAGATTCAGGACTAAAGG    | CCACTATAATTTGGAGGATTCTTGAC |
| 196 cgd8_1330 | ATCTGCATCTATACTAGGAGACCA    | CAGCAGGTGAGGATATTAAGTTT    |
| 196 cgd8_1350 | GGTGCAAGAAGAGAGGAATTTGA     | GCTACATACTGAACTTTCCAACGAC  |
| 197 cgd8_1360 | GCTCCAAGAGACCAAGAGAGAG      | GAGGTGAAGAAGGAGAACAAGG     |
| 197 cgd8_1370 | CCAAGTCCTGAAAGAGGAGGT       | TTCTGTGTTATTATTCTCGTGGCT   |
| 197 cgd8_1380 | CTCAGCTTGACGATTCTAACGA      | GATTCTTCAATTTCCCATCCA      |
| 197 cgd8_1400 | ACTGCTTACGTTGCTTATGGTG      | CTGCTCAAGTTCTGGATTGTGT     |
| 197 cgd8_1430 | TTTGCTAATATGGGAGATAGTGA     | CCATTCATGTTGAGGAGGTAGA     |
| 197 cgd8_1440 | ATTGGAGGATCTGCTATTTATTCTT   | TTCTTGTTGTTGTAGCTGGTGTC    |
| 197 cgd8_1450 | TGGACTGGAGCCATTAAGTAGAA     | ATTAAGATAACCACCTGCGGAA     |
| 197 cgd8_1500 | TTTAATAGGTGGGATTGACGCT      | CTCTGAACCTCCTCAAAGGGAGA    |
| 197 cgd8_1510 | TTCCCAACAAATGGTGAACATA      | GGTATTTCTGTTTCAGAGGTTG     |
| 197 cgd8_1520 | GCGAACATTTAGAGCTGAGTCC      | AGCTGCATTTGGTAAAGATGGT     |
| 197 cgd8_1530 | AGATGATGAACAGTACCGAGGG      | ATGACCTTCTAACGAACCTCCA     |
| 197 cgd8_1540 | TCCCTAACATTTATTACCACCACC    | GGTCCGATAAGTTGAATCCTTG     |
| 198 cgd8_1560 | CTATGGCAAATAATGGTAGCCC      | TGGAGGTAGAAGTGTGGCATT      |
| 198 cgd8_1600 | ACTTCGACAGGGTTTCTTCTT       | CACACCATTACTTCCATTTCCC     |
| 198 cgd8_1610 | TCTTGATTCTTCCAGCTCACA       | ACATCCGCTTCTTGAACACTTT     |
| 198 cgd8_1620 | AGATGTTAAGAGCCTGAAACGG      | CCTGTTCTACTGAAAGATGGCAC    |
| 198 cgd8_1630 | GAATTATGGAAGTTGATGGAGGA     | GAATTAGCAATAGAGAAATCAGGGA  |
| 198 cgd8_1650 | TGCACTGATATTGGATCTCTTCA     | TCCCTACCAGAAATACGACCA      |
| 198 cgd8_1680 | TTGGAGAGATGATGCAGGTAGA      | ATTGAAGTTGATTGAGCTGGGT     |
| 198 cgd8_1690 | ACTGATGAAATGCCTGGAAGAA      | CCTAATTCACGCTGGATCTTTG     |
| 198 cgd8_1700 | CGAATACGACTTTGCGTTCA        | CATTTGTCTGCCATCATCATT      |
| 198 cgd8_1710 | GACCGAGATTGAGGTAGCTTTG      | ACGTTGATTAGACTTGGGCTTG     |
| 198 cgd8_1720 | ACCCAAATTCTGATGAAGGAAA      | ACATCCCAAAGTCAAAGAAGGA     |
| 198 cgd8_1740 | AATTTGGAGCTGTTGACTTTCC      | CCTTCATCTTGCTCTGTGTTTG     |
| 199 cgd8_1750 | CCACAAACAACGAATCCACAG       | TACCTCCTCCATTACCTCCTCC     |
| 199 cgd8_1760 | AATTCCATCCAATGACTTGCTT      | TTTCCACTTTTCAGCCACTTTCT    |
| 199 cgd8_1790 | GCTTGGATGGTTTAATTGTGTTG     | CGCATTTGATTTCTTCTTTGGT     |
| 199 cgd8_1830 | AAAGAATACTGAATACGGAGGCAA    | TTGCTAACCAGTCCCAACTTCT     |
| 199 cgd8_1840 | GCCGCATATCTCCTCTACCTAA      | GGTTTGGAGTCTTCTCTCAAGG     |
| 199 cgd8_1850 | CACTTAGCTGGTACTGGTGCTG      | GGCGACCTTAATTGCACTAACT     |
| 199 cgd8_1860 | TGGTACTTGTGATTGGAAGG        | CTGAGGCGGAGATTGAGTATTT     |
| 199 cgd8_1870 | CAAGCGTAACTACATTGGGAGAA     | TGCAAACAGTCTTAACAACCA      |
| 199 cgd8_1880 | AGGTCGTAATGAAGAAGAAGAAA     | TCAAACGAACTGCATCAAATAA     |
| 199 cgd8_1900 | ACAAGGAGCATTGAGAAACCC       | ATTCGCATGTTTGCATAGTTCTT    |



|     |           |                           |                          |
|-----|-----------|---------------------------|--------------------------|
| 199 | cgd8_1910 | GGATATGGTTAAGAATGCTGGG    | AACCCTTTGTAAGATGGTGGAA   |
| 199 | cgd8_1930 | TTAGCACTTGGTGATTTGGTTG    | CGCTTTAACGAGTCCAATGTC    |
| 200 | cgd8_1940 | CTTTGTAGTGAAGTATGGTGTCCAA | CTTATCTCCTCTTTGTTTCATGCC |
| 200 | cgd8_1960 | TTCCGTAGTTGAGGAGATTGTG    | TCTTCGCCTGTATTTATTATTGGA |
| 200 | cgd8_1970 | CTCTTCACTCCTATTTGCCAC     | CTCTTCTTCCATCCAAAGCAAC   |
| 200 | cgd8_1980 | TTTCAATAGACTGGTCCTTACTTCT | TCTGCCTCTACTTTGAGAAGCC   |
| 200 | cgd8_1990 | TGAGGAATTACCAAACCACCA     | ATCCACAAGTTTCCACCAAAGT   |
| 200 | cgd8_2000 | GATCCCATTTGAGTCTTGGCTAC   | AAGGTGCATAAAGATGGAGGTG   |
| 200 | cgd8_2010 | ATCCAGCTAAATGCAGTAGAGTCC  | CCAGCCGTGAGTTATTCCAG     |
| 200 | cgd8_2020 | TTCCAACATCCTTACAAATCTTCA  | CAACAAATACCCTATCGCTTTCA  |
| 200 | cgd8_2030 | CCTGACAAGAGCGTAGTGAATG    | GGCAATCATCCTTAAATCCAAC   |
| 200 | cgd8_2040 | AGTCAAAGTCAGAACCAAAGCC    | TTATCATTGGCGCATTAAACTCT  |
| 200 | cgd8_2050 | GTCGAAAGAGGAACCTGAAGAA    | CTGACATGGTCGATAACTCCAA   |
| 200 | cgd8_2060 | ACAACATCCTTTACATCGCTCA    | CAATCAGGAGTCTGCCAATAGA   |
| 201 | cgd8_2070 | GAGTAATCTTTCAAGGGAGGAGAA  | TGAGAACGTGGAGGATCAACT    |
| 201 | cgd8_2080 | TATGTTCAAATGGCTCCTCAA     | TGATGTGGCTGATAAGGAAATG   |
| 201 | cgd8_2090 | ATGTTGAGTTTGTAGTGGATGGG   | TTGCTATTGAGACATTGAGCGT   |
| 201 | cgd8_2100 | AATTCTGAGCCGATTCCAGTAG    | TTTATTGCTTCTTCTTATCC     |
| 201 | cgd8_2110 | GGTTCTGGTGAATCTAGTGGCT    | TGGACATCTTGGACAATTTCTG   |
| 201 | cgd8_2120 | GGCTCAGATGATGAAGAGGAAG    | CTTCTTGGAAATAATGGTTGCTG  |
| 201 | cgd8_2130 | TGGCATCTTGGCTTTCTTTC      | TTCTCGATTGATCATCATTTGT   |
| 201 | cgd8_2140 | GGATGCGTCTGTAATCTTATCCA   | AATCACAAGAGCCTATAATCCCAG |
| 201 | cgd8_2150 | GAAGCTGTTGCACTTGATGTTT    | CTAAGATGACCGGAGCCACT     |
| 201 | cgd8_2160 | ACAAGGGATTTGGTACGGATAA    | GGATAAAGCGTCAACTACAGCA   |
| 201 | cgd8_2180 | TGGTGAATTTGAAGCAAGAAGA    | AACCATTCCGTTGGAGAATAAA   |
| 201 | cgd8_2190 | CAGCTCTTGTGAGATTTCTGCT    | AGATGACGTTGATACCTGCCTT   |
| 202 | cgd8_2200 | AAAGTACGAAGATGGTGGTTTGA   | GGATGCTCCCTTAAATCTGTTG   |
| 202 | cgd8_2210 | GATTTAAGCCGTCCAGTGAGTAA   | TTGTCCAATAATCCTGTTCCA    |
| 202 | cgd8_2220 | TTGGATTGATTAGGAGAAATTGG   | ATGTTGCTACCCAAGACACAGA   |
| 202 | cgd8_2260 | AGCAGATTTCCCAACCTTAAACA   | CCATGTATCATCTCCAGCGAC    |
| 202 | cgd8_2300 | TTGGATGGTCTAAATCCGTCT     | TTCTCATCTTCTCTTCTTCTCT   |
| 202 | cgd8_2320 | CCATCTGGGTCTACTAATGTTGTG  | TTTGGTCTTCTCTCTCTACCTG   |
| 202 | cgd8_2330 | CTATTGGAGGAGCTGATATGCC    | TATGAGAAAGGATTGCACCAGA   |
| 202 | cgd8_2360 | GATCTATCTTTGGCGGAATCAA    | TCTAACTATCATCCCACACCCAA  |
| 202 | cgd8_2370 | TTCAGGAGGAATTAGCGATGAC    | GTTTCCAGATTGCGCTTGTTAG   |
| 202 | cgd8_2380 | AGGGTTTGAGAGTGGATCAGAA    | CAACAGAGTATGAAGGATTTGGG  |
| 202 | cgd8_2390 | GAGTCTAGGGTTGGAATCACCTT   | GTCTCCTTATTTGGATGTTCCG   |
| 203 | cgd8_2410 | GCTTGGATGTGGAACAGAGAG     | CAGTCAGAAACTGCGAGAGAAA   |
| 203 | cgd8_2420 | AAACTAAGAAGTCATCCACCATTGA | GAGCTATTTCTGGGCTCGTCT    |
| 203 | cgd8_2430 | TGAAGGATTTACCAAGTATGCTGA  | GTTCTGCTCCATGTCTTCTTT    |
| 203 | cgd8_2450 | CAGAGCATCCATAATCAACCA     | GAATCAACAAGCAAAGGAGAGAA  |
| 203 | cgd8_2460 | AAGATTGGGTGTCTTCTCAACC    | TACGGGTCTTCTTTCTTGCTTT   |
| 203 | cgd8_2470 | ATGACAAACGATAGAGCAAGCA    | AGCTAGATCCCAACGTAACAGG   |
| 203 | cgd8_2490 | CCTCGTTACTGTTTCCACAA      | AGTTCTTGTCTTCCATCCCAA    |
| 203 | cgd8_2500 | CATGCTATCTCAAACCAGGAGG    | CCATCCCATTTATCAGTCCGT    |
| 203 | cgd8_2510 | GGCTCAAGCAATAATCCAATCA    | TACCAAGTAATGTTGCCATCCC   |
| 203 | cgd8_2520 | TCAAATGAGTGGTAGAGCAGGA    | AAAGGTTGTCCAGTAAGCATTGA  |
| 203 | cgd8_2540 | CATGGTTGTTCTCTGTCCAGTC    | TCTTCTCTTCTCCAAGTATCAGCA |
| 203 | cgd8_2550 | AGGTACACCATCAGCAACCTCT    | TGCGTGTTGTTCTTCTCACTCT   |
| 204 | cgd8_2560 | CAGCAAGCTATCATCATTGAGG    | AATACATGACCGCAAGGAATCT   |
| 204 | cgd8_2580 | CCTAAAGGTGGCTTCTTGATGT    | GTGCTGCTGCTACAAACTCACT   |
| 204 | cgd8_2620 | GGCCAATGAAATCTGCACTAA     | ATGAACACTTTCTCGCTCACCT   |
| 204 | cgd8_2630 | TCAGAAGTGTGGTGGGAAACT     | GGGAATTGAAGAATCAAATAGTCC |
| 204 | cgd8_2640 | TCAGAGAAATATAAGCTGGGTGAA  | AACTCTAATCGTGCCATCAACA   |
| 204 | cgd8_2650 | TTGGGCAGGACTAACTCATCTT    | CTCACACAGCAAGCAATACACA   |
| 204 | cgd8_2660 | GTACAAAGTGATTGATGGGCAA    | AAGTGTGTTCAAAGTTGTTGGTGT |
| 204 | cgd8_2670 | GGCTGTTCAATGGCTAATGTTT    | CCGTTTGATGTCGTAATAGCTTC  |
| 204 | cgd8_2710 | TATTATTGGACGGAGAGGTTGG    | TTATTTCTGGTCCGCTTCTTTC   |
| 204 | cgd8_2720 | TGTCCATACACAAATGCTTTCAC   | TGATCTAGCCAAACTTCCAACA   |

|     |           |                                                       |                                                     |
|-----|-----------|-------------------------------------------------------|-----------------------------------------------------|
| 204 | cgd8_2750 | T T A C T C C A G A T G G C T T T G A T T G           | T G A G C T G A G G T T A T C A G G T T T G         |
| 204 | cgd8_2760 | T T T C G G A G T A C A A C C T G A T G A T T         | G C C C A C C T A G A A A T A T C G C A             |
| 205 | cgd8_2780 | C A A C A A T T T A G A C C A C T C T G C A C T       | G A G G C G C T T A T A T T T G G A T T T G         |
| 205 | cgd8_2790 | C C A T G A C T T G A T G A T T G A A G G A           | A T T G C T G C C T T A C A C T T G G A T T         |
| 205 | cgd8_2800 | A A G A C T G C A A C T A T G A C G G A G G           | A C A A T A C C C A T C A C C T A C C C A A         |
| 205 | cgd8_2810 | C T A T T C T T G G G A A T G G A T T T G G           | T G T G T A T T G C A T T G T G A G C A A C         |
| 205 | cgd8_2820 | G T C G G A T G G C T T A C T T C A A C A             | A C G C A C T A C T C G A T A T A C C C A A A       |
| 205 | cgd8_2830 | G A G C A T T G T T A C T T G T G C C T G T           | T T C T T T G A G C C T A T T C C C A T T T         |
| 205 | cgd8_2840 | T A A A T G G T G G A G G T G G A G A C T T           | G A T T G A T C T T C G G T T T C T G C T C         |
| 205 | cgd8_2850 | A C T T C A T C A A A C C A G T A A C A A G C A       | G C A A A C C A C T C G A C A T T A A C A A         |
| 205 | cgd8_2860 | A G A G T G A C A A C T T T G G C T A C G A           | C C C A T A A T A C C T G C T G A A G T G A         |
| 205 | cgd8_2870 | A T T G A A G A A G G T G T T G T G C C T T           | A C T C T T G A T G T T G T G C C A A T T C T       |
| 205 | cgd8_2890 | G G A A A T T A A G A C A A G A G A A G T C A T C A A | T T T C G T A C A T T G A C C A T A C T C A C A A   |
| 205 | cgd8_2910 | G G G A T G G T A T T A T G G T T G A T G G           | C C T G T G C C A A T T A A G G A A A C T C         |
| 206 | cgd8_2940 | C C T C T C A A G G G A A C T A T T T G G A           | T G C C T C G T C C A T G A C T T T A T T           |
| 206 | cgd8_2950 | A T C A C A A C T C C T G A G A A A G G G A           | T T T C C T C T G A T G C T A T T G G G T T         |
| 206 | cgd8_2960 | G T T C A A T G G A G C G A A C A T A T C A           | T T C T A A G C G A T G G A C A G T T T C A         |
| 206 | cgd8_2970 | A G C T T T A T T T C C C A G C C T A T T A C A       | G A A G G G C T C A C T C T C T G G A T A A         |
| 206 | cgd8_2980 | T T G G G T G G T A G A T A C A A T G C T G           | G A C C C T G G A A G A C T A A T T G C T G         |
| 206 | cgd8_2990 | T G G A G C A A T C G T A C T T A A T T C A T C       | A A A G C C C T T C A A C T A C C C A T A A         |
| 206 | cgd8_3000 | T T G A A G C A C T G A T G G A A T A T G G           | A G A T T A A C A A G C A G G A C A A C A C A A     |
| 206 | cgd8_3020 | A C A A A C A A T G G G A A A C A C G A C             | C C A T A A A T G C A C G T A A A T C C T C T       |
| 206 | cgd8_3030 | T C A G A T G T A A A C T A T G C G A A A G A A A     | T G A T G T T C T G C T G G G T G A A G             |
| 206 | cgd8_3040 | T A C A A G T A T T T C C G G G T T G T C C           | A G A A G T A T C C A T T C G C A C C A T T         |
| 206 | cgd8_3050 | T T C T A C T C A A C A A G T C G C T C C A           | A T T T A C G C C A G T T G G A T T C T G T         |
| 206 | cgd8_3060 | T G T C T C A A G C G T C T A C A G A A A T A A A     | G T G G A C T C A C G A A T T T G A A T G A         |
| 207 | cgd8_3070 | G T A G C A A G C C G T C C A C T T A C A             | T A T A C A C C A A C T G C C C A A A C A           |
| 207 | cgd8_3080 | G G G T A C T C C A T G A A A G C T C A A C           | T C A T T C T C T G T G G C A A T T T C T C T       |
| 207 | cgd8_3090 | A G A T A T T G G G T C T C A T T G C G T T           | A T A A C C A T A C T C G C A C C T T C C           |
| 207 | cgd8_3100 | G T A T T T C T A G G C A A C T T T G G T G G         | T G A A T T G C T T C T T T A A T C G C T G         |
| 207 | cgd8_3110 | C T G A G A A A T C T G G A A A G T G G C T           | C G C T C A A G A G T C A A C C A A A T A A         |
| 207 | cgd8_3120 | A C T T G C G C T A A A T G A T A A T G C C           | A T T G C T T C T T G A T T T G C C T C C           |
| 207 | cgd8_3130 | C T G C A C C A A C A C T T T C A C C T A C           | C T T G A A T C T C A C C A T T C C T C C T         |
| 207 | cgd8_3140 | C T G T A A T T T G G A G A G G C C C A               | T A G A G A G A T G C T C G T C G G A A G T         |
| 207 | cgd8_3150 | T T T A C C A A C A A T C T C G A A A C A G G         | C G T A A T T G C A G A G C C A A C A A C           |
| 207 | cgd8_3160 | T T C G T G G A A G A A A G T T A A A T G G A         | A G A A A T T G A G G A A T A T C A T C C G A C     |
| 207 | cgd8_3170 | A T C T G G G C A G G C T A A A G T T G T             | T T G C T A T C G C T G T G T A C T C T C C T       |
| 207 | cgd8_3180 | A G T A A G G G T A G C A G C C A T T C A G           | T T A A T T C C A T T T A C C A C T G C G A         |
| 208 | cgd8_3190 | G G A A A G T G T C A G G T A A T G G G A A           | T A C T G T G T G T T T G A T G G T G G G T         |
| 208 | cgd8_3200 | A A A T G A A T A T C T C C C A G A G C G T           | T T T A G C G A T G C T T T C T T C T T C A         |
| 208 | cgd8_3210 | C C A A A C G A T G A A C A A C C T A C T G           | A C T T T C C A T T C A A G T C C C T T T G         |
| 208 | cgd8_3220 | T C A C G C T G G T G G C T G T A T T T               | C T T T C C G G C T G C A A T T C T T T             |
| 208 | cgd8_3230 | A G G A T A C C A G T G C C G A A T C T A A           | C C A T G A A A C A C T T T A C A C C C T           |
| 208 | cgd8_3240 | T T A C T G A A A T C G C C T C C A T T C             | T T G A G T G C T C T T G T T C G C T A C T         |
| 208 | cgd8_3250 | A A T G G T G T C T G A G G T G T T C A A G T         | G A G T T T A T C G C T G C T C C A A G A           |
| 208 | cgd8_3270 | T A T G C C A A G T T T C A A G C A A A G A           | C C A A A T T A G A T T C A T A G G T G C G T       |
| 208 | cgd8_3280 | G C A T A A G T C G A G C A G T A C C C T T           | G A A G A T A C A T T T G C C C T G G A A C         |
| 208 | cgd8_3290 | G T G T T G C T G A A C C G A T G T C T T             | T T C A A G T T C C A T A C T G C T T C C A         |
| 208 | cgd8_3300 | C A A G A C A G A C A C A A C A G G A T G G           | A C A G A G T G T G C A T T T C C A A C A A         |
| 208 | cgd8_3310 | C A A T G T T G C A G T T G T T C G C T               | A T C C C A T T C T A C T C C A C T T C T C C       |
| 209 | cgd8_3320 | G A G G T T T G C T T C A A C T T T G G T C           | T C A G G T C T A T T T G C A G G T A T T T C A     |
| 209 | cgd8_3330 | T G A C A G T G A G G G A G A C A A G A G A           | C A T C A A A G C A A T A C G C A T C A A           |
| 209 | cgd8_3360 | G T T T G A A T G C C A A A T A T G C T G A           | C C G C G A T A T A A T C T T G T G T T T G         |
| 209 | cgd8_3370 | T T A G A T G A T A A C G C T T C G T G G A           | T A C A A C T C C A A C T T T C T G C C C T         |
| 209 | cgd8_3380 | T G T A G G G T C G A T T A C A A G A G C A           | T G A G T A G A G G G A G T A A C C A G G A A       |
| 209 | cgd8_3390 | G C C T A G A A G T T G C A G T T C G G               | T T G C A G G A A A C A T C C C A T T T             |
| 209 | cgd8_3410 | A A C T T T G G G T A G A G T T G C C A G A           | T G A C A G G A T A C T T C T A A A C T T G G C T T |
| 209 | cgd8_3420 | T T G C G C G T A T A T T A A G T T T G G A           | G T C A T A A G G C G A T G T G G A A A G           |
| 209 | cgd8_3430 | C C C A A C A A T C T T C T C C T T T T G             | T C C C T C A T C A A G T T T C A A G A C C         |

|     |           |                            |                           |
|-----|-----------|----------------------------|---------------------------|
| 209 | cgd8_3440 | GAATCTCTTCGCCATTTGTCTC     | CCCAAACAATACTCCAGCTCA     |
| 209 | cgd8_3450 | TGCTGTAAGACCCGATACTCCT     | ATACATTCCCTTGATGGCTGTT    |
| 209 | cgd8_3460 | AGAAGGGAGATTTGGGAATGA      | ATTGAGATAAAGAAGGCGCAAC    |
| 210 | cgd8_3470 | ACAATTAACAAGCTCGAATCCCT    | ACATGGTTACAAGGAAGGCAAC    |
| 210 | cgd8_3480 | TAAAGACTCCAGGCGGTAGAAA     | CTAACACACGTTGGACATTTGG    |
| 210 | cgd8_3500 | CAGATCCAAACACGAGAACAGA     | TGCGAAGTTTCTTGGGAGTT      |
| 210 | cgd8_3510 | TGAATTTGACCGGAGTTTCATT     | ACTGTAAGAAGTGGCGTCCG      |
| 210 | cgd8_3520 | CCTGATACAGAGGCAAAGAAGG     | CAATAACAAATGCACGGGTAGA    |
| 210 | cgd8_3530 | AACTTTCCAACGCACATTCC       | GCTGGTAGGGCTCAAATACAAG    |
| 210 | cgd8_3560 | ATGTTCCGCGAGAGAGTAAGAG     | GCCTTGAAAAGTGTGTTTGAG     |
| 210 | cgd8_3580 | TATCATTGGCCGTTTGTAGTTG     | TTACTTTGTTGAAAGCCTCCGT    |
| 210 | cgd8_3590 | TTCCAATTAGGCTTCATGTTCC     | GAATAACCTTTGCTTGCCTC      |
| 210 | cgd8_3600 | TGCCATATTGGAAGAGGCTAA      | CCTTCATTGGATTCTACACCCT    |
| 210 | cgd8_3610 | TGCATGAGCTTCACTATCCAG      | TCTCCTGATGGGATTTCTGTT     |
| 210 | cgd8_3620 | GCGGCTCTGAATCTACGAAA       | AATGATCCGAATATAGTAACCAGCA |
| 211 | cgd8_3640 | GGCAAACACATTTCTCTTGTTG     | CGTTGTGAATCGACTTTGTAGG    |
| 211 | cgd8_3650 | ATATGGAGATGGATGGCTTGAC     | CTGATGGTAATTCAGCTTTGAGAA  |
| 211 | cgd8_3660 | CTTTGAATCCTGGCCTAAATGA     | TTCGTGAATTAGCGGTTTATCTG   |
| 211 | cgd8_3670 | TTAGCGAAGAGTTTGTGCTCC      | CCACCTTTGCATCTGTCTTTG     |
| 211 | cgd8_3680 | AAATCAGCAAGAGCAAATGGTT     | ATTCCACAGGTGTTATCCCAG     |
| 211 | cgd8_3690 | ATGGTGGATCTTGGTACTGGAA     | AAACTACGAGCCCTTTGCCT      |
| 211 | cgd8_3710 | AGGTAAGGAAGACAAAGCACCA     | ATCAAAGGATCGACAGGAACAG    |
| 211 | cgd8_3720 | CCATGCTGTGGTGAACATACT      | TTACGAATTGGATTATTGGGCT    |
| 211 | cgd8_3730 | CAAGTTCAGAGCAACCCACTC      | TAAAGCCCAAGCAAATATCCC     |
| 211 | cgd8_3740 | AAAGTGGAGAAGATGCAGAAGG     | AGCCGGAAGGAAGTAACATACA    |
| 211 | cgd8_3750 | CCCTCTGCAATTACCTATCACC     | ACTAGGCTTCTGCTGCTGTTCT    |
| 211 | cgd8_3760 | GGGTAATGTAGTTTGGGATGGA     | CACACTGAATGGATTGTCGAGT    |
| 212 | cgd8_3780 | AAGAATCGTTTAGTGCCTCTGG     | TGTCTGATTTGCTGGTCTCGT     |
| 212 | cgd8_3790 | TCCATCTCAAAGCATCAAAC       | ATCTCATCCCATTCTCTCCAAA    |
| 212 | cgd8_3800 | CACGCCCTAATGCTAATTCTCT     | TGCTGAGTAGTGACGAGGAAAC    |
| 212 | cgd8_3820 | ATCAGGTTTCGATATAATTGCGG    | GAGAGCCTATTACGTGGGTCAA    |
| 212 | cgd8_3830 | GGTTCTGCCACTTAAATCAACTTC   | GCTAACACTGCAATACCAACCA    |
| 212 | cgd8_3840 | GCAGAGGCTATTAGGACCA        | ATATCGACGGAAATCCCAGAG     |
| 212 | cgd8_3850 | TACTGGTGTGCGTTTCCAATAA     | TTCTCCCATGATACATTCTCTCC   |
| 212 | cgd8_3860 | AATGAGCAGGTTGAGGAAACAG     | AAGCAGGTTTGTAGTTTGCAGG    |
| 212 | cgd8_3870 | CTTTCTGGAGGAGCAAACAGAG     | TTCACCAGGCTCATGGAATAA     |
| 212 | cgd8_3880 | TCTGGCTATGGGAATAGAGGAA     | ACCACCTGGAACAAAGTGAGAC    |
| 212 | cgd8_3890 | TTGCTGAAGAGATGGTTGAAGA     | ATTTAGAGGCATGTGATTTGGG    |
| 212 | cgd8_3900 | TATTCATGCAGCTCTTAGCCAG     | CCTCTTCAAATAAGTCGGTTG     |
| 213 | cgd8_3910 | TTGGATTGATTGGAGTTATTTGG    | CAGTGTGTTGCTTTGTACTTGGG   |
| 213 | cgd8_3920 | TTGCCAGTGCTCTAAACCTTG      | CGACAGGAATCTCAAATCTTC     |
| 213 | cgd8_3930 | CAAAGGACGGAACCTATTTGAC     | GGAGGCCATTACCTACTTGAGA    |
| 213 | cgd8_3950 | TTAATTGAAGCCCAAGGAACAG     | GGCCAGTAAGGAACAAATAGCA    |
| 213 | cgd8_3960 | AATATGGATTGGAGTGAAGATGG    | CATTGCTTGTTACTATGAGCGAA   |
| 213 | cgd8_3980 | ACTCTGGAGGAAGGTTATGCC      | CTGGACAGCAATTTCTCTCTTT    |
| 213 | cgd8_4010 | ATCAAAGAGAGATGCAAGAGCC     | AAACCACCACTAGAAATGGATGA   |
| 213 | cgd8_4020 | CGATGGAGAAATTGAGGAAGAA     | CCAGCAGGAGAGAATGACCTAC    |
| 213 | cgd8_4030 | TTGATGTGCCAATAGAATGGTG     | TTGCTTCTGGAATTGATGGAGT    |
| 213 | cgd8_4040 | TCATCTTATCAACAATCAGAACGTAA | TTTAACAACAAGTGTGTGCCCT    |
| 213 | cgd8_4050 | TAAGAATGGGCTACAGCAAGGT     | CTCTTTCACGGAAGCATTGTC     |
| 213 | cgd8_4070 | CTCGAAGAAGAAGAAGGGACAA     | CTTCCATCACAATAATCACCCA    |
| 214 | cgd8_4090 | TTGTTGCTGGAATATGGTGGA      | TACAATCGGAAGATGCCCAA      |
| 214 | cgd8_4100 | GCAGATCAAACACATCCTGAAA     | CCTTCATCATCCATTGCCTC      |
| 214 | cgd8_4130 | AAGTGGAGGTTCAAACAGAGGA     | AATTCAAAGCTCATTAAACCCA    |
| 214 | cgd8_4140 | TTAGAGTTGGCCCTGAATACCA     | GGAAGAGGATGAGGAGGAAGAA    |
| 214 | cgd8_4150 | AGGAGGGAATAGAGATGGATCAG    | ACCATTATTGCTACCGCTTCC     |
| 214 | cgd8_4160 | CCGCTCCTGTTAAGGCTATTT      | TGTGTTGATGCTTTCAAGGTTT    |
| 214 | cgd8_4200 | ATCATGGTGGATTAGGAGGAAA     | GCTGGATAAGATTGTGTTGCTG    |
| 214 | cgd8_4210 | TTGGACTTTGACTAGATTAGATAA   | AACTCCTCGAATGAGCACC       |

|     |           |                            |                            |
|-----|-----------|----------------------------|----------------------------|
| 214 | cgd8_4220 | CTATCTCAAAGAACTGGCACCC     | GGCGTATATGTTACACCAAAGT     |
| 214 | cgd8_4230 | TGGAGCTAAATGCAAGAAACAA     | GAACTCGAATAGTTACACCACGAA   |
| 214 | cgd8_4240 | GTCGTCAAGTTTCTTTGGCATT     | CTAATCCTCCCATTCCCCTATT     |
| 214 | cgd8_4260 | GAAGCCAGTAATAGATCAAGGAACA  | GCTCACCTTCAAATAAGAAACGA    |
| 215 | cgd8_4280 | CTATGTATGGTGGCAATGTGATG    | ATTGGCTCTGGTACACGACTCT     |
| 215 | cgd8_4290 | AAGGTAATCCAGATAAGCCAG      | AACAGACAGGATCTCTTGGTGAA    |
| 215 | cgd8_4300 | AATGACTGAACTGAACTCACACAG   | AGCAAGAAGTACCTTAGCACGTTT   |
| 215 | cgd8_4320 | ACTGAGCACTATGATGAGCCAA     | TACCGAATCTAACAGGTGCAAA     |
| 215 | cgd8_4340 | TCAATTCGTTTCTGGAGGATT      | ATTCTGGCTTTGCTAATGGAAC     |
| 215 | cgd8_4360 | GCAGAGACGTGGTTATATTGGAGA   | TGTCTGGATGGAAGTAAATCGG     |
| 215 | cgd8_4380 | AATTTAGGCAGGAAAGAGCAGG     | GGGACTCAGAAGAAGACCCAA      |
| 215 | cgd8_4390 | GCTTCAGGTTTCTTGTTCAC       | GACCAATAACTCCAACTCCAAATC   |
| 215 | cgd8_4400 | GGAGAGAGAGAAACACAAACAGG    | ATGTTGTCATGGGTTTCGTC       |
| 215 | cgd8_4410 | AACGCTTTGGGTAAGATCAGAG     | CAGGTTGAGATAATTGAGGGAAA    |
| 215 | cgd8_4420 | AGGAATGGGAGCAAATGAACT      | GAATATAAAGTCAAATCCAAGGGAAA |
| 215 | cgd8_4430 | AAGTGAATTGGGAACTGAAGGA     | GGAGATTTACACATAGAACATGCAAC |
| 216 | cgd8_4450 | ATTCATCCCATTAGCTCTTCCA     | AGAGAATGTAAGTCAAAGCCAAAGA  |
| 216 | cgd8_4460 | ACGTCCATTTGAGTATCTCCGT     | GCTTCCAGTTTCCATCACTCTC     |
| 216 | cgd8_4470 | AATGGGACAACAAGTTCAAGGT     | TTGAGACGGATGGTCTTACAAA     |
| 216 | cgd8_4480 | AGAGGAGTTCCAATAGCTTGTT     | TACGAGGCGTTCTTTCTTACT      |
| 216 | cgd8_4490 | TCCTGCAAATAATGGAATACCTAA   | TTGGAGATGAAGATCGTGAATG     |
| 216 | cgd8_4500 | GATTTGAGAAGAGTAGCCTTTGGA   | TTTGCTATTTACCATTGCCATTT    |
| 216 | cgd8_4540 | GGCTCTATGACTAACTTGAAAGGAA  | GTACCAAACATCATTCCACCCT     |
| 216 | cgd8_4550 | GAGGGTTAATGACAACCAAGCA     | CAAATTCAGCACATTCAGAGGA     |
| 216 | cgd8_4570 | GCAAAGAAACAGACAGACCACA     | AGAAACCATCAACTCCAACAGG     |
| 216 | cgd8_4620 | CTGAAACATATCGCAAATCCAA     | AGCGGCATCGTCTTCTAGTATC     |
| 216 | cgd8_4630 | TCTGTTCTCCTCCTATTGCTCC     | CAGTAAGGTGATGGAACCAGTGT    |
| 216 | cgd8_4640 | CAACACTTGGAGGAATAGATGGA    | TACCAGGAACATCGAAACGAC      |
| 217 | cgd7_2680 | ATTCAAATCCCAGTTCCGAGT      | ATTGCGGTCATTGTAAATTCCT     |
| 217 | cgd7_2690 | CCGTAGTTAAGGAGCTTGATGG     | TTTCGCTTTGTTTGTATTTCTTC    |
| 217 | cgd7_2700 | CAGAGGCGTATGTTGAATTGTC     | CCTGGATATACCGCAACTTTCT     |
| 217 | cgd7_2710 | ATTTACGTGGCTGGATTGAAGT     | AAGGAAGGCTAGATAAGGGTGG     |
| 217 | cgd7_2720 | CTACGGATGCTACGAATGAGAA     | ATAGGGCTGATGAGAGAGTTGG     |
| 217 | cgd8_4660 | GGACTTGTGTTCCCTCCAAAGT     | AGAACTCGCTACAATGCTTTCC     |
| 217 | cgd8_4710 | GCCTATTGTGCTCTTTGTGGA      | TCCTCATTATCATTGGCCTCTT     |
| 217 | cgd8_4730 | ATTGGAACAACAACTCATCCAGTATC | TTCTTGGTAGGAGATCAATGCC     |
| 217 | cgd8_4740 | ACCGAGTTATCACCTTCCAGAG     | CAACATAAAGCCCTAGCCCA       |
| 217 | cgd8_4760 | CCAATAATAGATACCGTTGGAGAGA  | CCATACAATGAAAGCATGAACAA    |
| 217 | cgd8_4770 | TCCTGGGATAGAAATTGGAGAA     | AATGACTGCATGTGGAAGATTG     |
| 217 | cgd8_4790 | TGAAGCTACTGCAATTTATGGTG    | TTGTTAGTCCAGAACAGAGCAAA    |
| 218 | cgd7_2740 | ATGAAAGCAGAATGGGAGTTAGA    | ATGGTATCCAATCCAAACAACA     |
| 218 | cgd7_2760 | TGGTGGAAAGCCCTTTAATTCT     | AATAGGGTAGCCAAAGCAAACA     |
| 218 | cgd7_2770 | ATAAATCTAGTTGCTGGCGGAA     | CAGGTTTGGAAATTGGACAGA      |
| 218 | cgd7_2780 | CTTGTGAATGGTAGTGCTTTGG     | TCCATGTTAATTCCGCTCTTT      |
| 218 | cgd7_2790 | TTCAACAAGGGACATTTCAACA     | CTGCAACTTCGGCATCTTCT       |
| 218 | cgd7_2820 | GAAGTTGGTCAGAAAGGTGGTC     | TTGTCGTGTCAATCTCTTCCC      |
| 218 | cgd7_2830 | CAGAGGAAGGAGAGGTGGTAGA     | ACTCCAGTGAGAAGGCACAAA      |
| 218 | cgd7_2840 | GATATGCAAGATTCCGGGTA       | GTTAGGGTGAAACAGTGGTGGT     |
| 218 | cgd7_2850 | CGATGTAAATGGAGTTTCTGT      | ATCGCATCCTAAATCCCAA        |
| 218 | cgd7_2860 | ACGAGTTAGAGAAGGATGACGG     | GCAGCCTAAATTGGAGTTGATT     |
| 218 | cgd7_2870 | TTCGATGACACAAGAGGGTATG     | AACTTTATCGCGTTTGGATCAG     |
| 218 | cgd7_2900 | GGATACCTCCAAATCACAGCA      | AGCACAGAACGTAAGCAACTCA     |
| 219 | cgd7_2910 | TGGTTCTACAATTTATGCGAC      | TCCATTTGAATCGTTAGCATCTT    |
| 219 | cgd7_2920 | TCCTACTGGAGACATTCCTCGT     | GCCTTCGATGATTCCCTTATCTG    |
| 219 | cgd7_2930 | GGAGACTGCTAATACTGAATGCC    | CCAAGTGAATATAGAGGAAGATTGA  |
| 219 | cgd7_2950 | TTGTTGACGGTGTATTTGACCT     | TCATAAGCTCTCCACGTTTCATC    |
| 219 | cgd7_2960 | AGCAGGTAGTTGCGATTGAAGA     | TACTAAAGGTGTTTCCCAGCCA     |
| 219 | cgd7_2980 | TCAGTCAATTCTCAGCCATGTT     | TTGATGCGTTCCTCTTCTATCTC    |
| 219 | cgd7_2990 | AAGAATGAAAGATTTATGGGATCAAC | GGAGATGTTGTTGTTAATGGAAC    |

|     |           |                                    |                                   |
|-----|-----------|------------------------------------|-----------------------------------|
| 219 | cgd7_3010 | GGATGTTGTTGTTGTTGCTGTT             | TATGTATGGCTTAATGGCGTTG            |
| 219 | cgd7_3030 | GAGACAATAATACATCGCCAA              | TCACCAAGAAGTTGAGAGCAA             |
| 219 | cgd7_3040 | CGTATGTATTGGCACAGTTGCT             | CGTTCCCTCTTCTAAATCTCA             |
| 219 | cgd7_3050 | TTAAGCATTACCAAGCGTCA               | CTGCCATTACACATCCAACACT            |
| 219 | cgd7_3060 | ATTCGTATCAAGACCGTTTACTCA           | GCAAATAGGTAACAAAGCGACA            |
| 220 | cgd7_3070 | CTAAGGGAATGCGAAGTTGAAG             | CTCCATGATATTGTGTGGTGAGA           |
| 220 | cgd7_3080 | GAGGAGTGCATCAAGGCTATTT             | TGGTCTATTTACTGGGTTTGGG            |
| 220 | cgd7_3090 | TAGCAGGAGATACCGATTGCC              | GGTTCGACCATTATAATAACCAAG          |
| 220 | cgd7_3100 | AACCCATCGTGATCTTAGCATT             | GGGCGGTGAGTATTAAGTGAGT            |
| 220 | cgd7_3110 | ATTGTTGATATTTCTGGCTGGG             | TCGTTTCCAAGTTCTCCATTCT            |
| 220 | cgd7_3120 | TTGGAGATGGGAGCCTACAAG              | CGTTCTATGGTGTATCCGTCGT            |
| 220 | cgd7_3130 | TTTCCGTTGATAGTGTGGATTATGT          | TTACGCACTTCTTGTCCATTCA            |
| 220 | cgd7_3160 | TGCGCTGGGTAATAGAGTGTT              | GCATTGAGCCATTATTTAGTTGATT         |
| 220 | cgd7_3180 | AAGTTTCGCAAGATGACCCTAA             | TAATGCAAGCTGATGCTGTTTC            |
| 220 | cgd7_3190 | GTCAATGGCGCAAGATAGATAA             | TGGGTGCAAATATCAGGAGAA             |
| 220 | cgd7_3200 | TCATCAGTGCTTTCCGTTTCT              | TCACCTCCATTAAGGCTCTTTC            |
| 220 | cgd7_3220 | GTTGAGCATAGGGAAATTGGTG             | GTGCTGCTTTATCTGCGATTCT            |
| 221 | cgd7_3230 | GAACTCCGAAATGTGATACAAGG            | ACTCTAGTTGAAGCGCCAGAAG            |
| 221 | cgd7_3250 | AGTGGTGGCGAGTATTTGTCTT             | AGCAATCTATCCTTCTCCGAACT           |
| 221 | cgd7_3270 | AGCTTTACAGAGAATGTGCCGT             | AGATGAATCGTTGGAATTTAGCA           |
| 221 | cgd7_3280 | CCAAAGCTCCCATTATGGTT               | CCCGAATAGAACCCAATAATCTC           |
| 221 | cgd7_3290 | TTCTGGTGTATTGAACGCAACT             | TCCATCATCTGTCTCTGAATGG            |
| 221 | cgd7_3320 | AGTTCCTTTGGAGGAGTTGGA              | AGGATGAACAATTACGGACCAG            |
| 221 | cgd7_3340 | GGAGAGCAAATACGGAACAAA              | GCTAAAGTCAGAAATGCAAACGA           |
| 221 | cgd7_3350 | TTAGCTTTGAGAGTCGGAGGAG             | ATGCTGAGGGATCAATAACGAC            |
| 221 | cgd7_3360 | GTGCGTATTGGCATCATCAG               | TTGTAACGAAATAGGAGTGGACATAA        |
| 221 | cgd7_3370 | CAATATGAGCTTCGAGAGACAGAA           | GAGAATGCAATGAAATACCCATC           |
| 221 | cgd7_3380 | GGATAATGGTAAAGGAAGCGTG             | CCCTGCTGTATTTGATGCTATTT           |
| 221 | cgd7_3390 | ATCTCCCCTCAAAGCCAGTT               | GATCCTGCAAAGTTATCGGAAG            |
| 222 | cgd7_3400 | CAATATAGAGAGCAAACCATTACACA         | ATTGAGTCGGTGCCATTTACTT            |
| 222 | cgd7_3420 | TGTTGTGAAGCCTGACTATTTGA            | TTTCATGGACTGTACTGGGAAAC           |
| 222 | cgd7_3450 | TTTCGAGGTCGCTATCACTTTC             | GGCACTTCCATTTGCTGTATG             |
| 222 | cgd7_3460 | GGCTATGGGCAGATTGTGTT               | AAGCGTCAAATAGATAGAGAATAGGG        |
| 222 | cgd7_3470 | ATTGGCTGGAAATTAACGGAA              | TTAAAGCAAGCCTGTTGGAAGT            |
| 222 | cgd7_3480 | CCACCTAGTTTCACATGGGTTT             | CAAATGTTCCCGCAAATAGTGT            |
| 222 | cgd7_3490 | TAAGGACAGGCGAGAACTTTG              | GCTATCGGCATCTTATTTGCTT            |
| 222 | cgd7_3510 | TCAGATGGCAAACAGGCTACT              | GTCAAAGGTTCCAATGTTTCTC            |
| 222 | cgd7_3530 | TTCGTCTACAATATGCGTTGCT             | ATCAAATGTTCCACCTTCGTTT            |
| 222 | cgd7_3540 | ACAAGCCGTCAAAGAGAAGAAG             | TCGACATTTAGCGCAATACAAC            |
| 222 | cgd7_3560 | GTCTGTGCTCATTGGCTGTC               | GATCGCATGTAAGGGTGGTT              |
| 222 | cgd7_3580 | AAAGGGTATCCAAGAAAGGGAA             | GAAAGCTCAATTTCTGACCACC            |
| 223 | cgd7_3590 | GATTTGTTTCGATGATGTGAAACC           | AGTGCTCGTCGTTTATATTGCC            |
| 223 | cgd7_3600 | AGTATTCTCGTTCCATCATCCC             | ACTTCGTTGTAGAGATCGCACTT           |
| 223 | cgd7_3620 | TATGAATGGTACGCCTTTGCTT             | CCATACCGAATTATCGCCTACA            |
| 223 | cgd7_3630 | GGACCTAGTCGAATCAAGAGGA             | TGCGCTTATTGAAAGTTGTGTT            |
| 223 | cgd7_3640 | ATTCTTGTGCATTACAAACAGGG            | AAACCGCAACTACATCACCATT            |
| 223 | cgd7_3650 | CAGACTCCGTACATTCCAATCA             | GATGTCAGTTTTCGCTAGAAATCC          |
| 223 | cgd7_3660 | ACCCTGACGTAGAAATTGAGGA             | TCCTGTGGCGATAGAATAGTGA            |
| 223 | cgd7_3670 | TGTCCTTCTGGAGCTACTTTC              | ATTCGTCAGCAAATGAACCAC             |
| 223 | cgd7_3680 | CCCTCAGCTTTGGATTGTAGTT             | GGATCGCTTCATCGTATTTCTC            |
| 223 | cgd7_3710 | TCAGTGTGAGTCTTCAAATAACGAG          | TCTTACGTTTGCATGTTGTATC            |
| 223 | cgd7_3730 | AACGATACTGCTAGGCGATTATTT           | CGACCAAACCTTTCTTGTCTTT            |
| 223 | cgd7_3750 | ACTTAGATCACGGAAGGCAGG              | TCCCATAGGCACAATAACTTCA            |
| 224 | cgd7_3760 | AATTGGAACGCCTTATTATTTGTC           | GATCGGTTTCTCAACATACCCT            |
| 224 | cgd7_3770 | TCACAACAAGCAAACATTTCTCA            | GATTTCGGCTACCCATTTCTC             |
| 224 | cgd8_4800 | AGA GCT TCC AAC ACA AGG AGA C      | TTT CAC TAC ACG CTC CCA AAC       |
| 224 | cgd8_4810 | GAA TCT CCA GAC TAC TTT GAC TTT GA | TCG CCA TCA TCA TCT TCT TCT       |
| 224 | cgd8_4830 | TCA CCA ACA ACA TCA TCA TCA G      | ATT CTT TCC TGG CGT ATA TGG A     |
| 224 | cgd8_4870 | TGG AAC AAC CAT CTA CTG CAT C      | AAC TTA CTT TGA TTC TTG GCT CTC A |

|     |           |                                   |                                    |
|-----|-----------|-----------------------------------|------------------------------------|
| 224 | cgd8_4880 | TCA GGA GTT GTT GGA AGT CGT       | CCA TAC TGA CCT TGT TGA TGG A      |
| 224 | cgd8_4890 | GAA TGA GGA GGA CTC AGA CAG G     | CAA TTC TGC AAT CAA GAC AAT CA     |
| 224 | cgd8_4910 | AAT TGG AGA AGG TCT GGT TTC A     | GAT GAA CAA GCT CAC AAG CAA G      |
| 224 | cgd8_4930 | TTG ATT TAT TTC CTT GCC TCG T     | AAT TTG TAA ACT TGA TGG TCT GGA A  |
| 224 | cgd8_4940 | CTG TAG TTG GGT CTG TAG TTG GG    | AGT TCC TAT GGA CGA AGA CGA A      |
| 224 | cgd8_4950 | GGG ACA TTC ATT CAG ACC AAG T     | ACA TAC CAG AAG GAG CAG TAG CA     |
| 225 | cgd8_4980 | TGC TAT TTG GGA GCT TAA CCA G     | TTT GGG ATC AGA AGG ATC AGA G      |
| 225 | cgd8_4990 | TTT ATA TCC AAC CCA ATC AGG AAG   | GAT CTG ACC AGT CCC AGG TAA A      |
| 225 | cgd8_5000 | ATT TCT GAT GGG AAT TGT CTG G     | CGA CCT GTC TTG CTA TAC CTT CA     |
| 225 | cgd8_5020 | ATA TGA GGA AGC ATT GGA GGA G     | TGT CAA CAT TCC AGT TAC CCA G      |
| 225 | cgd8_5030 | TTT GAT GTT GAG GTT GTA TGC C     | CCT GAG CCA TAT TGG TTT CTC T      |
| 225 | cgd8_5050 | GCC ACT TAT ATC TTG TTT CGC TG    | AAT TCG ATT GTT GTT TCA TTT CTT G  |
| 225 | cgd8_5060 | GTG CAA CCA GAA CAA CAA ACA C     | CAA ATG CTC CAC TTC CCA TAC T      |
| 225 | cgd8_5080 | TTA TTG GGT ATG ACT CTC CAT CTT T | TTC GCT AAA CTC CTC TTT CTG TC     |
| 225 | cgd8_5090 | TCC AGG TTT ATT TCC AAG GTG T     | CTA ATA CTG ATT GAT AAT GCC CAG AA |
| 225 | cgd8_5120 | TAT CTG GAG CCT TGG AAT TTG T     | TGT GTA AGT GTT CTG GCA AAG G      |
| 225 | cgd8_5130 | CTT GGA GTA ACG AAC AAC ATT CA    | TCA GGG TAC ATT TCA GCT TCT TT     |
| 225 | cgd8_5140 | CAG ATA CTC ACT GGG ATG ACG A     | CAA AGT GGT TTG ACG GTA TGA A      |
| 226 | cgd8_5150 | ATT TAT GCT CTC TTC TTC CAA ACC   | ATG AAC AAA TTC TGG CTC TCC T      |
| 226 | cgd8_5160 | GCA ACT TCC CTA CAG GAA CAA G     | AGC AAA CTC TGG CTT GGA ATA A      |
| 226 | cgd8_5180 | CAC TTT ACA ACA GAT GCC TCC C     | TCC AGA TGT CAA TAG GCT GTC C      |
| 226 | cgd8_5190 | TAC GAG CAT TAA ACC AGG GAC T     | TGG AGA TGG AAC TAA TTT GGA GA     |
| 226 | cgd8_5200 | TTG TTT GGC TCC TTA TTG GTG       | AAG TTA CGC AGT GGC TAG AAG G      |
| 226 | cgd8_5210 | TTG GAA TTG AGA GAA AGG GAG A     | TTG GGA TGA TTA TGT TGA CAG G      |
| 226 | cgd8_5220 | GGC TGC GCT ACT ATT TCC TTT       | TTG GGC TCT CTT GTT TGA GTT T      |
| 226 | cgd8_5230 | TGG TCG TGG TAA AGG AGG TAA G     | TCG TAG ATC AAG GCG GAA ATA C      |
| 226 | cgd8_5240 | AGC TTT CAC CTG TTA GCG ATT T     | TCT TAT CCT TTA CGC ATC TTG GT     |
| 226 | cgd8_5250 | GCG CAT TGA AAG AAT AGT AGC A     | TCA TTT CCA GAC CCT TGT TTA TC     |
| 226 | cgd8_5260 | GAA GAG AGC CAA TCC AAA CTC A     | GCT TCT CAA CCA TTT CTG CTG T      |
| 226 | cgd8_5270 | TTG GAT GTT TAG TGT TGT GGT TG    | AGG TAA ATC TGG AAT TGC TCT CC     |
| 227 | cgd8_5280 | ACT TGA GGA CAA GAG CGA AGA A     | GGT CTA ACC TCG CAG TAA CCA A      |
| 227 | cgd8_5290 | TTC AGG ATC TGG AGG TTT AGG A     | GCC CAC TGA GGA AGA GTA AGA A      |
| 227 | cgd8_5300 | ATG ATG GTG AGT ATT CCG GTT C     | TTG AGA AGG GTA CTT TGG CAT T      |
| 227 | cgd8_5310 | ACC CAT TTA TCC AGA GGG AAG T     | CCA GAC CAT CTT CTT CTT GTC C      |
| 227 | cgd8_5320 | GAA TAA ATG GCT TTC ACC ACC T     | TAC TCC CAA GTT CCA AAC ATC A      |
| 227 | cgd8_5330 | GTT CAC CAA CTC ATC ACC TTC A     | GTC AAA TGC CCA GTC TTT CCT        |
| 227 | cgd8_5340 | GAC GTA TTG CGC TCT TGA GTA A     | AAC CTC AGC AGA TTG AGA AAC C      |
| 227 | cgd8_5350 | GAC GGG TTC CTA GAT GAG TTT G     | TGC CAG CCA ATA TGT TTA TCA G      |
| 227 | cgd8_5370 | GGA CAT CGC CTT CGT AAT AGA C     | TTT CAC AAT CAG CAT CAT TTC C      |
| 227 | cgd8_5380 | TGT CTT GGG TCT GGT GAT TAT G     | GTG CAG TGG TGG ATT GAG TTT        |
| 227 | cgd8_5390 | AGA ACC GTG TCG TTA ATT CCA G     | AAT TGC TCC GCT ACT CTT TCT TC     |
| 227 | cgd8_5400 | GAA CTC GAA TAC AAG CAG AGC A     | GAA ATA GAG TAT CGC CGC ATT T      |
| 228 | cgd8_5410 | TGG AAC AAA GCT AAG ACA ACC C     | TTC GCA AAC TTC TTC ATC ATC TT     |
| 228 | cgd8_5420 | TAA AGA TGG TGG AAA GGA TGG A     | TCC AAT ATG AGG GAA GGA TTG A      |
| 228 | cgd1_10   | TAT TCC TGT TGT TGC ACT GGT T     | ATA AAC GCA AAG ATT GAG GCA        |
| 228 | cgd1_1040 | TTG AAA GAT GAT GAG ATG GAA CA    | TTG ATT CTC TAT TGA TGT TGG TTG A  |
| 228 | cgd1_1070 | AGG CTA TGG ATT TGT TTC ATT CA    | CAT TTC GTC TTG TCA TTT CGT C      |
| 228 | cgd1_120  | GCT CAT CTA ATG TTG GGA TGT TG    | AAT TTC TTT CTT CCG CCA CTT T      |
| 228 | cgd1_1200 | TTG AGT GTA TCG AGT GGT CTG G     | GAG TTC TGG GAG CAT CTT GGT        |
| 228 | cgd1_1320 | CTC ACT AAG AAT GCA GGA AGA ATG   | CTT GCC CAT ATT TGA GTA TCC C      |
| 228 | cgd1_1540 | CTG AGG ATG GCT CTC TCT ATC AA    | AAG GAG GGT GAA TGA ACT AGC A      |
| 228 | cgd1_1590 | TAA GTG CTC TGT TGC GTT CTG T     | TGT GTA TGC TCT TGA TTG TCT TCA    |
| 228 | cgd1_160  | CAA TTC AAG AAG AGC AAC GAA A     | TAA TGT CGG AGG AAC CAT AAC A      |
| 228 | cgd1_1600 | CTG TAG CAC CAG TAC ACG CAT T     | CCG GAA CTT TGG TCA TTA GGT        |
| 229 | cgd1_1620 | AAA GGC ACC GTT CAG CTA TTA C     | AAA GAA CCA TTA GGC TCG CA         |
| 229 | cgd1_1720 | GAA CCT CCA CAC TAC GAT AGC C     | GGT CGT TCA TAA CTT TCT TGC TG     |
| 229 | cgd1_1730 | CCT CTA GTC TTG CCG TTT GAA G     | CCA GCT AAT GAA CCA TCC AAG T      |
| 229 | cgd1_190  | TTA TTG CCT TGC TTA CGG ATT T     | TTT GTG AAA GTA TCT GGC CTC C      |

|     |           |                                    |                                    |
|-----|-----------|------------------------------------|------------------------------------|
| 229 | cgd1_1900 | TGC AGA GGA TGT AGA ATA GGG AA     | CAC TGG GCT CAT TAC GAT TAC A      |
| 229 | cgd1_20   | ACT GGT CTT GGT CAG CTC CTT        | TCA TAT TCA CAG CTC TCG TAG CA     |
| 229 | cgd1_2040 | TAC ATT CCT CAG TTC CAA AGC C      | TGC AGT ATT CCC TGT TTC TGT G      |
| 229 | cgd1_2050 | GGA TGG TAC AGC CAC TGC TT         | TAA TCA CTT CGT TTG TAT CTG GTT TG |
| 229 | cgd1_2190 | CAA GCA TAT TGA TAA CTC AGG CAA    | TGT ATC CCA GTA ACA GTG GCA G      |
| 229 | cgd1_2340 | ATC TAT ACG AGG CAA GCC AAA C      | GCC ATC ATC ATC TGT AAT GCT C      |
| 229 | cgd1_290  | GGA CGG AAG CAT TGA AAG AGT        | ATC TTG TTG TTG GTA CAT CGC A      |
| 229 | cgd1_2950 | TTG AAG AAG CGA AAG CAA GAG        | CCA CTT CCA TCC CAA TAT GAA        |
| 230 | cgd1_30   | TCA TTA GCA TCC GAG TGT CTT G      | CAG GTA ATC CGC AAT AGT AGC C      |
| 230 | cgd1_300  | TCA GCT ACC AAG AGA TTG ATT CC     | TCC AGA AAT TGC GAA ACT AAC A      |
| 230 | cgd1_310  | CGC AGC AGG ATA TGA TGT TAG A      | ACA TTC CAT ACC GAT GTT ACC C      |
| 230 | cgd1_3160 | TTT GTT TGG AAC TCT CAT CCA G      | AAG CTC ATA AAC CTC AGC CAG T      |
| 230 | cgd1_320  | GTC CAT TCT TCC ACA AGG AAC T      | ACA TCT CCT AAC CAT TCC AAC C      |
| 230 | cgd1_3280 | GAC CTG CGA TAT TAA GCA TTT GT     | GTC ATC ATT ATT GCC GTC CTC        |
| 230 | cgd1_330  | GAT CAC TTC AAC TCT GCA TTG G      | TTC TCA GGA TGC TCA ATA GGG T      |
| 230 | cgd1_3370 | GAT GGC TAT AAA TGG ACC CAA A      | TTC GTA AAC ACA CAT ATT CCT TTC A  |
| 230 | cgd1_3380 | ACG CAC ATT ACA AGT ATT CAA CAT AA | TGA AAG ATC AAG TAA AGC CAG AAA    |
| 230 | cgd1_340  | TCC TAC GAT GGC TTC TTC TCA        | ACA GCA AGA CGA TGG ATA CAA A      |
| 230 | cgd1_360  | AGA GCC ACA AGA AGG AAA GAT G      | TTT GGT AGG GAT TCT GGG ATA A      |
| 230 | cgd1_3810 | CAT TAG AGG AAA CTC CAT TCG G      | AAT GTT GAG AGG GAA ATT GTG G      |
| 231 | cgd1_3850 | TTT CTC AAA TCA AAG CAG CAG A      | ATA ATA GTT CCC AGC CAA CGA A      |
| 231 | cgd1_3860 | GTC CAC TTA GAT TGG CTG TTC C      | GCT CAC CTC TAT CGG TTT CAT C      |
| 231 | cgd1_40   | TATTATGCGATGGACTCACTGG             | GGAGTTGAAGGAAATCGAGAAA             |
| 231 | cgd1_470  | AGAAGTGGAGTGGCTGTGAAA              | TAAACTGGAGCTTGTGGAATCA             |
| 231 | cgd1_50   | GAAATGATACACCCATCGACCT             | TCCACGAGCTATAACAACCAATAA           |
| 231 | cgd1_500  | ACTGTTGCTCTGGTTGCAGTT              | CTCAGAATGTGTTTTCGGTTTGA            |
| 231 | cgd1_520  | TTATGGTTTGATTGGTTCTTTGG            | CCGGCAGCTAAACTACTGAGAC             |
| 231 | cgd1_550  | TTCCCATATTTACAACAAGGA              | TCATTGCGTTTATTCTTTGACC             |
| 231 | cgd1_60   | ATGTTCCCTGATAAAGTTCCTCC            | GGGTTTCAGATCACGATGAATAA            |
| 231 | cgd1_600  | ACTTATTCGACTGCGAGATTGG             | TCAGGGCTTTAACTCCAAGAGA             |
| 231 | cgd1_640  | TCTTTAGCTCCACTTCCTCCTG             | GGTTTCAACGCCAATAGAGAC              |
| 231 | cgd1_710  | TGGAAGAATGAGAATGGATGA              | GGATTCACAAAGATCACAAACA             |
| 232 | cgd1_780  | TTCTTTCCATGTTTGGTACATTTG           | AATCCACCTTTCTCTTGAGTTT             |
| 232 | cgd1_850  | CATCAAAGGAGTTACCACCACA             | TTAGAAAGAGCACCAACACCAA             |
| 232 | cgd1_870  | GCCAAAGACTGCCAATAACTTC             | GAGCCATGAAACCTGGAATAAC             |
| 232 | cgd1_880  | CATCTATGCACGGAGATATGGA             | TAAGTTTCTGGTGAGACAGGCA             |
| 232 | cgd1_90   | GAATAATGGTTTCATGCCAGT              | CAGTTCCGATTGGTAGGTGATT             |
| 232 | cgd1_910  | CTTCTTCGGCTTCATTATCCTC             | CGGCAGTTAAATCCATAAATCC             |
| 232 | cgd1_930  | TGATGATGATGAGGATGAATTTG            | TTCTTTGCTTCTTGAGCTACTG             |
| 232 | cgd2_10   | GCAATCGCACATCATAACA                | TTTCATAGAGAGTTCAAACCATTCTC         |
| 232 | cgd2_100  | CATCAGCACTCCTCAAGAACA              | GGGATCTAATGCCTCATACTCAA            |
| 232 | cgd2_1000 | GACGGCTAACAATAATGGGAAA             | GATCCCTCGACAATAGGTCTCA             |
| 232 | cgd2_1010 | CAGGTTTAGCTTTGGCTTCTGT             | ACACTTTCGTGCTCGTGATAAA             |
| 232 | cgd2_1030 | ACAATCTGGAAAGGTTGATGGT             | TGCCAAATACTACAGCAGGAAA             |
| 233 | cgd2_110  | GAAGAAGCTGCAAGAGCTGGAAA            | CAAACATGGTCTGCTTGTGTGT             |
| 233 | cgd2_1140 | TCGATTGGAGTTTCTCTTGTT              | GATATTTCTCGTCCTTGCTTG              |
| 233 | cgd2_120  | CGTAAAGCTCACAGAAACGGA              | GCTGCTTCTTTCATAGCAACCT             |
| 233 | cgd2_1210 | CGGAAGATATGTGCATTGACC              | TCCTTGAGAATTGCCTCTTGTT             |
| 233 | cgd2_130  | TATCCAAGCTCCAATCTGTTCC             | TCACCTTCTTCTCCTCCTCTTC             |
| 233 | cgd2_1360 | GCTATTACCAACTGAAATCGGG             | GTAGAATCAAGGTGGGTGAAGG             |
| 233 | cgd2_1390 | ACCTCCTAATGGCGATGCTAC              | CACTTTCTCTAAGGTGCTCCAGTC           |
| 233 | cgd2_1640 | TATAACCTCATGGACCGAAACC             | TTAAGGAGGCCATTCTATCTG              |
| 233 | cgd2_170  | CCAGAAAGCAGTTTGTGTTGA              | CAGTTTGCATCTTGGACCTTG              |
| 233 | cgd2_1790 | AAACACGAAGCAGGAATGAAA              | TCAAGCAACATCGAGAGTGAGT             |
| 233 | cgd2_1860 | TTGGATCTCACTGGCTAAATCA             | TGATACGCTATTCCCATTCTCA             |

|     |           |                            |                            |
|-----|-----------|----------------------------|----------------------------|
| 233 | cgd2_1890 | AATTGGCCTCCCAGACTATTTTC    | GCACAACCTTTCCTCGTTCATTT    |
| 234 | cgd2_210  | TGGCTATATGATGAACGACTTGA    | AGAGCGTATAAATTGGCTTGA      |
| 234 | cgd2_2120 | CCAAGTTTGAGGTGCGAAGT       | TTCTTGTCTGCATCTGCCTG       |
| 234 | cgd2_2190 | CCTTTACCAAATCCAAGCGA       | TGATGGTGCAGTCATAGTAGGG     |
| 234 | cgd2_220  | CAAGACCTGATTGTACCGTTGA     | TTGATGCTGTTGTTGTTGTTGA     |
| 234 | cgd2_230  | TTTGGATTGGTTCTTGGAACT      | TCAAACGTGGCTTCTTTATTCTT    |
| 234 | cgd2_2300 | TTTCTATGAGAGGCGCTAAGGT     | CGTTCCAATGTATCAAATCCAA     |
| 234 | cgd2_2310 | AGGTGCAACATGGCTTTATTCT     | GCGACCAAATATCCCCTTCT       |
| 234 | cgd2_240  | TACGCTCTGGTTTATATGCAGG     | GATCTTTGCTTGCCACTCATT      |
| 234 | cgd2_2400 | ATGGCACCTGTATTCTCATTGG     | TTGACATAACTCGACCAGCCTT     |
| 234 | cgd2_2420 | TTCCCTCTAATTTTATGTTTGA     | TGAGCCCTTATTTGATGTGTTCT    |
| 234 | cgd2_2440 | CGTTGAGTTATTCCGAGCAAG      | CGATGGTTACATATTGGGCAG      |
| 234 | cgd2_2560 | TGTTGAAGTTAGATTTGGGAAGG    | AAGATTGGAGTTCTGTTGAATGG    |
| 235 | cgd2_260  | AAGCTCCAGAAGATAGTTCCC      | TCGTCCTCATAGTTATCGCTTTC    |
| 235 | cgd2_270  | GACTAGGAGCTGTTTGCGACTT     | GGTATGCCTGAGCAGTTTCTTT     |
| 235 | cgd2_2850 | AATAACAATGGGAACGAGGAGT     | AATCCAAATCTGAGTAACGAGCA    |
| 235 | cgd2_290  | AAATAGGGTAGGCATTCAACCTAA   | TGTTTCGTATCAAGAGTTGGAGAAG  |
| 235 | cgd2_2900 | TACACGATACATTGCTTCCACA     | CACTCTTGTCCAAAGATCAAAGAC   |
| 235 | cgd2_2950 | TCCGAAAGTGAATATCCCAAGT     | TCCACGCCATCCAAGTATAAG      |
| 235 | cgd2_30   | GAAGATTTGCTTCTCCTCCAAC     | TCTTGACATGCACCAGGATTAC     |
| 235 | cgd2_300  | CTGCACCAAACCTCAACTCAGAC    | TAGTCTCGCCACCATAAATCAA     |
| 235 | cgd2_310  | ACTTTCTGCATACCTTGCCTTC     | TTCTGCTGTCATACCTGCTAC      |
| 235 | cgd2_3120 | AAACAGACCGCAAGGATATACAA    | CAGATTCCCAAATTCATCAACA     |
| 235 | cgd2_3410 | TGGCACTATCGAGAATATGGAA     | CAACATCCCAAACAGTGAAAGA     |
| 235 | cgd2_3520 | CTCAATTCTCGGCATTAGATGTT    | AAGCATTTCTCAAGCTCCTC       |
| 236 | cgd2_360  | GGAGGTGATGATTGGGATAAGA     | CCTTGAATCTGGAGAAGAACCA     |
| 236 | cgd2_3740 | GGCAAAGCCACTATGAAAGATAA    | TGAAACTTAATGGGTCACCTTGCT   |
| 236 | cgd2_3940 | TCTGAACTGGGATTTGTCAGG      | CCAGGTTGTGTCCATCTTGTT      |
| 236 | cgd2_40   | TCTAAATGTGAAGAGCCCAGACA    | GCCGCCTCAATTACCATAGTTT     |
| 236 | cgd2_410  | CAGGTTCTAATCAAGGGCAGTC     | CGATGACGAATATGAGGATGAA     |
| 236 | cgd2_4120 | TTACTCGTGGTGATGGTACTGG     | CAAATACAACATGCTTTCGGTC     |
| 236 | cgd2_4140 | TGCCAAATTAAGAGGGCAAGG      | TTGGTGTGTTGAATTGTCTTTCTGT  |
| 236 | cgd2_4170 | TGAGAAAGCACGTAAAGAAGCA     | AAAGGAACAAAGCCAACCCT       |
| 236 | cgd2_420  | ATACGGAAATAAAGGAAAGCCC     | AGAGTTTGAGGAACCACCTTGA     |
| 236 | cgd2_430  | GTAAAGCACCTGTTCCAACCTCC    | GCCTCTCACTCCTCCTCTTCTT     |
| 236 | cgd2_450  | GAAACCCGACTCAACCTAAACA     | CCTCTGATTGCTCATTACCTCC     |
| 236 | cgd2_480  | GGTAAGATTTCTTTGGATCTATGACT | CTTGACAGAATCAGGATCATTAGTTT |
| 237 | cgd2_490  | GGAGGAGTATTTACACGACCAGTT   | TCATTACATCCATCTTTCTTTCATTT |
| 237 | cgd2_50   | TTGGAAGAAATTGGTCAAGTAA     | AAAGGGAAAGAACGCAAAGAA      |
| 237 | cgd2_610  | GAAAGTTGATGCAAAGAATGGAG    | TCCTCCTGAGAGCTGAAGAAAC     |
| 237 | cgd2_620  | CTGTAAGTAGCAGCAGAGAGAACCT  | TGATGCCAAAGTCATTACGAGA     |
| 237 | cgd2_640  | AGGTTGATGGTAGCAAGATGGT     | TGGAATGATAAAGATGGAGATGG    |
| 237 | cgd2_70   | GGAATAGTGGGTAGATCAGGGA     | GGAACCTGAGGAAGAACTCCAA     |
| 237 | cgd2_720  | TGACCAGCCACAAGTATCAATC     | TGATGTATTTCCAGTTTGACGG     |
| 237 | cgd2_730  | TTGAAGTATGCAAATGGGAGG      | TCTCTAAATCCTGGTGGAGGAA     |
| 237 | cgd2_740  | ATATGTCCGATGAAATGCAACA     | AAATTACGACCAACAACGCAG      |
| 237 | cgd2_750  | TACAATGAAGAATGGCTCTTGG     | TGCACAGATATTGCGTAGTTGA     |
| 237 | cgd2_760  | CCCAGACTACGATGAAGCAATAC    | GAAAGCTCTGCTGCCCTACTAA     |
| 237 | cgd2_770  | ACACGCATTACAAGAGCACAAAG    | CCACTTAGGTCCAGAGGATGAG     |
| 238 | cgd2_810  | ATGGCAATGGCTTTATTCTG       | CCATCAACGTCAGCTTCTCTAA     |
| 238 | cgd2_820  | CAACAACGTAATGGCAAGAAGA     | CTCCCTGAATTTGAAGAATTGG     |
| 238 | cgd2_830  | ATATGGATGGGCTTTACTTTGG     | CTGGACGAACGAATACACTTTG     |
| 238 | cgd2_840  | AATTCTTAATGTCAGGCCAACCC    | CTCGTGGTCACTTCTACCTCCT     |
| 238 | cgd2_900  | GGGCTACATTTGTTGAGCTTTC     | CCAGAAGATCGGTGGAGTTTAG     |
| 238 | cgd2_910  | TTTGGACTCTCGGCTGTTTATT     | TGCATTTAGCACACTTGAGTAGGT   |



|     |           |                             |                           |
|-----|-----------|-----------------------------|---------------------------|
| 238 | cgd2_980  | CGCTTTGTGAGATGCTAGAGG       | AGTTTGGTCTGTCTATGGGAA     |
| 238 | cgd2_990  | AAGGTGCTGGCAAATATACAGG      | AAATCACTTCATCCAGTTCGCT    |
| 238 | cgd3_100  | ATGTTTCCGAGTTTGTCAAGCA      | AAAGATCCCAACCAGGAGAAA     |
| 238 | cgd3_1020 | ACCAAGGAATCAACTAGGCAGA      | AGTCATTCCGGCTTTGGAAATAA   |
| 238 | cgd3_110  | AAATGTGGTAACTGAGCTGATGG     | TCCAAACCTATCCCTTCCAAA     |
| 238 | cgd3_1110 | AGGACCCAAATAATCGTCTCAA      | CTCATGCTTTACCCATACTCA     |
| 239 | cgd3_1410 | GCGGTACGGGTTTCACTATC        | ACCAAGTGGAGTCGTAAAGGT     |
| 239 | cgd3_150  | GAACACAAACAAGAGCAACCA       | TCCGAGTTATTCACATGACCTCT   |
| 239 | cgd3_190  | ATGTTTACCAAATGGGATGGAA      | ACTCTGTTGTTGTTGTGGTTGG    |
| 239 | cgd3_2260 | GAGCGTGGAGTTGTTCAAGAG       | ACGTTAGCACCAATGAAGGAGT    |
| 239 | cgd3_2420 | TFACTCTCATTCAATTTGCTGCTGT   | TCACTAAAGGTAAATCTCCAAGGG  |
| 239 | cgd3_270  | AAGAAGAAGAGGAGGTGGAAGG      | TTATTGAACTGGTTGGACGAAGT   |
| 239 | cgd3_2700 | TTTGGGAATTAGATTAGTTGAAAGGT  | TTGTCTTGAGCCTATCTGCTTG    |
| 239 | cgd3_280  | GGTCAGTAAGCTCAGTTCGTCA      | TTGGTCTTCTGGATTGGTTCT     |
| 239 | cgd3_2830 | TCTTGAATTGGACGAAGGTTG       | GAAATGTCTCGGAAGGCTAATG    |
| 239 | cgd3_30   | TTGATTTCTTGATGAACCTTGAAA    | CTTGAATAGTCTGCGCTGGTAA    |
| 239 | cgd3_300  | TTCCGCTCCTAATACAACATCC      | TTCTGCATAGCTCGTGACTT      |
| 239 | cgd3_3220 | GATGAAACAAACAATCGGAAATAA    | TCAGCACAATAGCATCTCGG      |
| 240 | cgd3_330  | TGTGGAGGAGCTGTTAAAGGA       | AATGCACCACTGCGTCTATCT     |
| 240 | cgd3_3430 | ATCCTGAGAAAGAAGGACACCA      | ATCATAAACCCACCAACATTCC    |
| 240 | cgd3_3820 | TTCTGTGTTGACTGATGCCTTT      | CCAACTCCTGATTCTTTCCCT     |
| 240 | cgd3_3850 | GAGTGACGGCAAGATTGAGAC       | TTCTATTCAAAGGCGAATTACCA   |
| 240 | cgd3_40   | TTAACGCCCATTTAGGGATAGA      | AAAGTCTCAACGGAAGTACCCA    |
| 240 | cgd3_400  | CTATGAATTGTTCCCGTCCACT      | ATTTCTGATTTGGATCTCACCTTC  |
| 240 | cgd3_410  | CGCAAGAGGAAATAAACGAGA       | TCCCACATCAATATAGCCAGAA    |
| 240 | cgd3_4100 | AGGTGCAGTTCATCATACTTG       | ACATTTTCATCTTCATTCAAAGCC  |
| 240 | cgd3_4110 | GTTCGAGTTGATGGAGGACTT       | CTTGTTGGTGTGTGTCTTGCTT    |
| 240 | cgd3_4170 | CAATTTTCATCATTGGCCTTATTT    | TAAGATTTCGACTTGGACGACTG   |
| 240 | cgd3_4220 | AAAGCATGTGGGAAATGTAGTTG     | CAGATGATAATGAAGTAATCCACCC |
| 240 | cgd3_430  | ATCCAGATGAGGAGAGGTTTCA      | AGACCCTTGACGTTGCAGATT     |
| 241 | cgd3_4300 | GCTAGAAACACTGCAACCGAC       | CCTAATGCCGAGTACGACTAAGA   |
| 241 | cgd3_550  | CAGCAACTCTTACAGCAGGTCA      | GACTCAAGCATTTCAGGAGCA     |
| 241 | cgd3_650  | AAGAAAGACAACAACATGATCCAA    | AATCCCAACAAGAATAACAAAGAGA |
| 241 | cgd3_690  | AACTCCGTCAAAGAACTCCAAA      | GGAACCTTGTAATCCTCTCCA     |
| 241 | cgd3_70   | AGGCAAAGAACACAAATCTGAAC     | TTTGAAGAAATTAAGGGAGGAGAA  |
| 241 | cgd4_100  | CATGAGCGAATCAACAAATGA       | GCTTTCCGGTCTTCAAAGTG      |
| 241 | cgd4_1010 | AGAGACAAGAGGAGGAACAGGA      | AAAGCCAACAAGAAACAACGA     |
| 241 | cgd4_1020 | ATGATTGTATTTATGATTTGGGATTTG | GCATCAGCTCCTCTTTCATCTT    |
| 241 | cgd4_1030 | CAAACAAAGGTGGAATGAGTGA      | TGGAAGTGGTCTAAGGAATGG     |
| 241 | cgd4_1080 | AGATGAAGTAAGATCAGGAATGGTG   | TTGAATGTGTTACCAACCAGAATAA |
| 241 | cgd4_1090 | TTCAATATGAGGAAGCCAAGAAA     | TTTAATCGGGTCATCCCAA       |
| 241 | cgd4_120  | GCGTATTCATCTTCAGTTCCATC     | CATCTGGTAAATCATCGCACA     |
| 242 | cgd4_1230 | GCCAAGATAACCAAGAAGAACT      | GGACGGGATGAGATTTGATTT     |
| 242 | cgd4_140  | CAGTGCTACAATGGAACAGGA       | CATCATCAATGTCAACTCCACC    |
| 242 | cgd4_1590 | GCTGGTCTCGGAAGTTTGATAG      | TCACCATCTGCACGTAAATCTC    |
| 242 | cgd4_1650 | AAGGTTGATGTCGATTCTCTCC      | CCACACTCTTTACTTCTTACCATT  |
| 242 | cgd4_1700 | GAAGGCTCCATATTGCAGAAAC      | TCCATTTGATACACACCAGCA     |
| 242 | cgd4_1830 | GTTTAGAGAATTTACGCAAGCTGA    | CCATATACGACCACGACACAA     |
| 242 | cgd4_190  | ATTGAGAGACCAATTCAACGGA      | TTTCTTATCATTCCGGGAGACCA   |
| 242 | cgd4_1940 | AGGCCAGTCTTTGTATGGT         | TCTGCCCTAATTGTACCTGGA     |
| 242 | cgd4_2020 | AATGCAGCGATAATGAAAGTGA      | GCCTATTTGCCCTACCAACA      |
| 242 | cgd4_2040 | ATTATTTCCCAGCCTCAATCAA      | GTGCTTAATGTCGATGCAGAAG    |
| 242 | cgd4_2110 | TGGTGATCCATTTACAGACGAG      | AGAACTGATTGTGGTGAAGCA     |
| 242 | cgd4_2260 | CCATGCAATGTTGTAGTTCCAG      | TGTGAAGCCGTAACCTTCTTCC    |
| 243 | cgd4_2270 | GTTTGGGAAGTGTTTATCGGAG      | ACAATATCACGGCAACAAAGG     |

|     |           |                             |                             |
|-----|-----------|-----------------------------|-----------------------------|
| 243 | cgd4_2300 | GTGAAACCTATCTCCCGCATAA      | ATTCGCATGGGCTATTAAGAAA      |
| 243 | cgd4_2350 | TGATACAGGTTTGGGAATAGGG      | ATATTGGTACGTGATCGCTGG       |
| 243 | cgd4_2370 | GATGGAGTGTATAAAGGACGCAG     | ATGTGACTCTTCCAGACAACGA      |
| 243 | cgd4_240  | GAGAGGATGCAACGAAATGATAG     | CAAATGATCCAGTTCCTCAAAGT     |
| 243 | cgd4_2400 | TTAAAGGCATCCGTGAATTTG       | GAATCTTCTGACTCGCTACGCT      |
| 243 | cgd4_2460 | GACAATGCACGATAATAACAAGG     | TGGGTCTGTCTAAGTCCAAAGTC     |
| 243 | cgd4_2530 | CATAACAATACGTGCTTAATTCCA    | GCATAAATCTTTGAATCGCCTT      |
| 243 | cgd4_2540 | AGAAGTACGAGAAGCCGTTGAG      | AACGTGGCTGTTGTGTGATTAG      |
| 243 | cgd4_2680 | TTAGAAATTGAAAGTAACCCGACAG   | AGAATGAAACAATGCCAAATGTAA    |
| 243 | cgd4_290  | GAGTTATTATTGACGGCGAACC      | ATGTAAGGGTATTAGTGCAGTTTCAAG |
| 243 | cgd4_2910 | AATTTCTCAAGTTCTCGCCTCTT     | ATCATCATCTACCAACGGCTCT      |
| 244 | cgd4_2950 | CAATCTTGGAAAGTCGTTGGA       | AAATGATCTGGTCGCTCTTGTT      |
| 244 | cgd4_2990 | AATCCACACAATGGAAGATGAA      | CATCGAATCTCGTTAGGATGTCT     |
| 244 | cgd4_300  | TTTGATTGGAGATCACAACCTTT     | ATTTCATACATTAACCTTCCCTCATC  |
| 244 | cgd4_3000 | ACGCCTCTAACTCGAAGTACCA      | CTGAAACGCCAATACGATTCT       |
| 244 | cgd4_3020 | CAGATATTCCCTTACCGAACCA      | GTCCATGTTTGGCTTTGACTTT      |
| 244 | cgd4_3080 | ATCCAACGATGAGTGTGAAGG       | TCAGAAATACCTGCTTGTCCA       |
| 244 | cgd4_3130 | AAGTGCTTTGGGCAACTGTATT      | AACTTTGCGTAACTCCCTACCA      |
| 244 | cgd4_320  | CTTCTGCCCTAAATTCGTCAA       | CTGATTGGGTCAACACGTACTC      |
| 244 | cgd4_3260 | AATGTACCTGAAGGGTAAGTTGAATAA | CAATCAAGTCTGCATGTGTAAGAA    |
| 244 | cgd4_3270 | CAAAGGCTAAGTTCAAGGATGG      | TGTGCCAAGAACCCTAAGAAGT      |
| 244 | cgd4_3340 | TCACATCCAGCTCCAAGTACAG      | ATTCGCATTATAATTCCATCC       |
| 244 | cgd4_350  | GGAAAGTTCATGGTGTAGTTTCA     | GAGATCAATTACAACAGGCCAA      |
| 245 | cgd4_3500 | TTAAGAATGAAACCATTTGGAGA     | ACCTAACTTGAAACCACAAGACA     |
| 245 | cgd4_3530 | CATGGTTTGGAAAGCAGAAGAGT     | TTGCTGTGGTTGTGATGGTAGT      |
| 245 | cgd4_3550 | CCACACAAGTTAAGCCAGAAGA      | CAAGATCCAAAGTGACAAATGG      |
| 245 | cgd4_3570 | ATTTGAAGTAAATGAGCCAGGAA     | TACAAGAATTTGCCATTATTTGAGA   |
| 245 | cgd4_3620 | AGAAGAACCBAAGAAAGTCCGAG     | AGCTGGCTTATCCTGTGGAG        |
| 245 | cgd4_3630 | TCTGTAAGCGCAAGTTCTGTGT      | TCTTCCTCCTCTTTCTCCTCCT      |
| 245 | cgd4_3640 | TGTCAAGAAAGAAGTTAAGAACCC    | TGAAGTAACAGAAGAATGAGTGGAA   |
| 245 | cgd4_3670 | ATATCTAAAGGCAGTTCGGTG       | TGTTGATCCTGTTGGTCTTGTT      |
| 245 | cgd4_3720 | ATAGCCCTTCAATTCTCCTCC       | TGCATGTTACCTTGGTAATG        |
| 245 | cgd4_3880 | ACTGGCGAACATGGAAATAATAG     | CATAAACTCCAACAAGTCTGATAAA   |
| 245 | cgd4_390  | CATCACGCTTATTGGTGCTTC       | ATCTTCGCATGGGCTATCAA        |
| 245 | cgd4_3910 | GGTAGAAGTAGAAGTGATCTTGGGAA  | CCTTATCTGAAGGAGTTGTTGTTGA   |
| 246 | cgd4_40   | CTTAAACAATCCAATGAGGCAGT     | CTGGGCAAACATATCGTAGTCTC     |
| 246 | cgd4_4020 | TCCAGAGGATGTAATAAGACCAGA    | TTGCTTGATGGAGAAGGAGTG       |
| 246 | cgd4_410  | AATCGGCAGAGATGTTATCAAAG     | TCTCCAGCTTCGTGTCTAACC       |
| 246 | cgd4_420  | AATCTTTGCTGGGAGTATGTTTG     | TCATTGTTTGCATTTCCACTCT      |
| 246 | cgd4_4210 | CCTGAATGACGTGTTTATGTTGA     | TCCTAAATGTGACTGAATATCTGGAA  |
| 246 | cgd4_4490 | AAACTCTGCCGTTGTTGAATCT      | CATTGCTTGCTTCATTCCCT        |
| 246 | cgd4_520  | GTGACGATGAAGATGATTATGAAGA   | GCACCTCCTATTTCCCTTGAC       |
| 246 | cgd4_580  | TCCAGTAGAGATTTGCCCACTT      | TATAATGCACCACAGTCCCATC      |
| 246 | cgd4_630  | TGCAATAGTCAAGAAACCAACTTC    | GCTTGTTCTACGCTTCCGTATT      |
| 246 | cgd4_880  | ACAAGAATGGTGCAGTTTAGGAA     | AGCAATAAGATTTCCCGATTGA      |
| 246 | cgd5_10   | CTGTTGACCCTTCTATTGAGCC      | GGCTTTCTTCTCCTTCTTCTCC      |
| 246 | cgd5_1030 | GACTCGCGTATCGTTGTATCTG      | AATTTGGGTTGTGCTCTTCT        |
| 247 | cgd5_1050 | CCAGGTAACGCTCTTGAACC        | GCCAACAATTCTGCAATAACAC      |
| 247 | cgd5_1080 | GATATGTTTCATGCGGATTTGTT     | TTAAATGCTTTGCTTTCGACCT      |
| 247 | cgd5_110  | CTTTATGATCTTCCCTCCTGCAAA    | TTGAATTTGGATTTCTCGTTGA      |
| 247 | cgd5_1150 | GGTGCTCGATGTTCTAAGTCAA      | ATCTTCTTCTCCCAAAGGAATGT     |
| 247 | cgd5_1290 | TGAAGTACGGAATTATGGGTGA      | TTCCCTTGACACAACAACAAC       |
| 247 | cgd5_130  | GATGCAAAGCTACCAAATCCA       | TGAAACTCCAATGAATCCAACA      |
| 247 | cgd5_1310 | TCAAACCTGAAGCAGATGCAATAC    | TTGAGAGTTCCACAGAACGAAC      |
| 247 | cgd5_1420 | TTTATGCTTCGTGTAGCCCTCT      | GCAGATTTGTCAGGAAATAATGG     |

|     |           |                             |                             |
|-----|-----------|-----------------------------|-----------------------------|
| 247 | cgd5_1470 | CGTCATTATCAAGTGAAGATTTGG    | CGTGGATTGTGGGCTAGTTT        |
| 247 | cgd5_1520 | CTATTGAACAAGGGCTTAAACAGTC   | TAAATCTGAGCTATTTCTGTGCTCTAA |
| 247 | cgd5_1530 | AACTTTCTTTCCAATCACCATCA     | GCTTGCGCTTGCTACTACATT       |
| 247 | cgd5_1540 | GATTGATTGGTTCACGTTAGGAC     | TGAGCTATGCCACTTGTTATTCA     |
| 248 | cgd5_170  | TTCTTTCAACATCCTTCTCCAGT     | ACTTCTGACGATTCCCATTCA       |
| 248 | cgd5_1740 | AGCATCCTGTTCTTTAGAACCT      | ATTCGATCTTGCCTTTCCATT       |
| 248 | cgd5_1790 | AATGGGAGTGTAGGATTGTAGAGTTAG | CTTTAGAGATGAATTTGGCATAGAAA  |
| 248 | cgd5_1840 | ACTTTATGACGAATTGGATGGG      | AAGTCAGTGCGGGTTTAGAATG      |
| 248 | cgd5_20   | GCTGTGAGAATTGCAGACTTGA      | CTGCCTGAGAAACAAACCCTAA      |
| 248 | cgd5_2000 | AAAGAACTACCATCCGACCAA       | TTGCTTTACAATATGCTTCCATTCT   |
| 248 | cgd5_2030 | AACAATGAGGCAAGTAACACAAGAG   | GACATTTGATTCCAGACTTATTTCAAC |
| 248 | cgd5_2080 | AGCGAAGGTAATCCAAACAGAG      | ATACAAATCGCAAAGCAAGTCA      |
| 248 | cgd5_2180 | ACCGCTCCACTAAAGAAAGATG      | AGGAGTAGCAGGAGTAGCAGGA      |
| 248 | cgd5_2450 | GTTCCAAGATGTCAAGGTTGTATG    | TCCAAATACCTCTCATCCATTTT     |
| 248 | cgd5_2550 | GGATGGTAGAACTCTCTGACTACA    | TTCTTATCTTGAATCTTTGCCTT     |
| 248 | cgd5_2630 | TGTGGATCACTAGAATCAAACAGAA   | CATAGGGCTTTACTTCCCTCAA      |
| 249 | cgd5_270  | AGATCCAGAGAATATAAACAGCCA    | TATTTGTAATTGCCAGAGCTGATT    |
| 249 | cgd5_2700 | TTTGGCTTTAATCTTGGTAATTCAG   | TCCTTCCTCATCATTCTTCTCC      |
| 249 | cgd5_2710 | GAAACAGAAGCAGAAACAGAAACA    | CCACATCAAATTCACATAGACGA     |
| 249 | cgd5_2720 | CTTTATTGTTTCTGGTCGTGGTT     | CAATGTTGACGGAATTTGGA        |
| 249 | cgd5_2750 | GGATATTCGTGCCCTTATTTGT      | TCTTTGCGTTATTTGGATGAGA      |
| 249 | cgd5_2780 | CACAAGAATCAAATGATCCAA       | TGCTGGTAAATCCAAATAACGA      |
| 249 | cgd5_2800 | TTTCTTAAATCAATCCAGAAAC      | AAGACCATACGATCCTTTACCTTG    |
| 249 | cgd5_2900 | TGATGGTAATCAACTTTGGGTG      | TGGATCTCCTGTAATGGGTTTC      |
| 249 | cgd5_30   | TGGTACACACTACTGAAGGAGAGAA   | GCTCTTAGCTTGCCTAGATTACTTG   |
| 249 | cgd5_3040 | GAAGAACGATTCACCACTCACC      | GGAACAAATACTGCAACTGCCT      |
| 249 | cgd5_3050 | GCACGAAGTTGTTAGCTCCTC       | TTGATTTCATTAAAGTAGTTGGGTCA  |
| 249 | cgd5_3060 | AAGACCTTCTAAGCGATCCACA      | ACAAGTGCCTTTACTGATCCAAA     |
| 250 | cgd5_3070 | AAATATGGGTGAAATGGCTGAA      | GACCAAGAATGAAGAGCTTTGG      |
| 250 | cgd5_310  | GATGGTATGGATCAAATTCAGGT     | AAAGCGTTCCTTTGCACTTT        |
| 250 | cgd5_3160 | ATGAACCCAAAGGTAATCGTG       | TACGACCAGAGGCATACAATGA      |
| 250 | cgd5_3170 | TACTATCGCATCCAGAGAAATCC     | TGTCCTCCAGTGAACCTTGGTAA     |
| 250 | cgd5_3210 | CAACGAAAGGATTCAAGAAACAA     | TTTCATCATAGACATCATCGTAATCTG |
| 250 | cgd5_3220 | ATTGCTAGTGGAAATGGCTGAGT     | GAGGATACTTTGGGTAAATTCTGGT   |
| 250 | cgd5_3270 | CGTCCTAGAGTTTTCGGATTT       | TACACTCAACCCACTTCCCTTT      |
| 250 | cgd5_3280 | TTGAGAGAATCCGTAATGTTGG      | TTTAGCCGTTCTTCTTATTTGTT     |
| 250 | cgd5_3290 | GGCCAAGGATTTAACAGAAGAA      | AATGTGAGAAAGATCAGGAGGG      |
| 250 | cgd5_3340 | ATGTGAGGCGGACTTTAGACTT      | TAATTTGTTCTGTGCCTTCTGG      |
| 250 | cgd5_3350 | AGGATTGAAAGCACAAAGGTGAG     | ATACCACCCTTCTGTTGGAG        |
| 250 | cgd5_3380 | ACTCAAGCCCAATGAACCTTT       | GCTGCTCCCTCTTAATGACCT       |
| 251 | cgd5_3420 | CAGGAGCAATTACACATTTCCA      | G TTCAGATTCCCAAGTTCCATC     |
| 251 | cgd5_3430 | AAAGAAGAGGCCGATAGATGTG      | TGGTGATGATTATGTTGTGCTTC     |
| 251 | cgd5_3450 | ATCGTAACACAGCATCCCAAG       | AACATCTTCTTCATCAGCAGCA      |
| 251 | cgd5_3460 | CAGGGAAGGATGGATTTGATAG      | GCCAGTCATAGTTTGTGTTGGA      |
| 251 | cgd5_3490 | TCTGTTATTGCAGCTTTGCTCT      | TCTATCGCCAACTTTGTCTTG       |
| 251 | cgd5_350  | TCTACAGAACTATCAAACCAGGAATCT | CATTATCATCCTCATCTCCATCAA    |
| 251 | cgd5_3530 | TGTAGGGCGTATATGAGGCTTG      | CAATTCGTCAATTTGAGAGTATTTGGT |
| 251 | cgd5_3570 | CAAACCTTGA CTCTAAATGCCGA    | GCAACAGCTTCAACACCTCTAA      |
| 251 | cgd5_3600 | GTTACCACAAGAAGAAGTAGCTTTGA  | CACTAATAACCTCCCTGAATAGATTTG |
| 251 | cgd5_3680 | CCCTTAAACCATTCAAATCCTG      | CATCCAATGTA CTCCACCCAC      |
| 251 | cgd5_3690 | ATTTCCCTAATTCATGCTTTGCT     | TGAGTCTTTATTCTGATTCCATTCTCT |
| 251 | cgd5_3770 | ACTTCTCCATTTACGAACCAA       | ATAACCCGATACACCTCCAACA      |
| 252 | cgd5_390  | TTGACCTTTACAAACCAGAAA       | AATCCCATCCATGAACTCTAAATC    |
| 252 | cgd5_40   | GAAGATGAAAGTGACGAGGGAA      | CGAAGCAGAATTAACAATCGAAG     |
| 252 | cgd5_400  | TTCATTACCATTCCAACCTCCTG     | AAATTCCTCATCTTGGGAGTCGT     |

|     |           |                           |                             |
|-----|-----------|---------------------------|-----------------------------|
| 252 | cgd5_4090 | AGGCTTCCTCCTGGTTCTATTT    | AATTCCTCCAACCTCCTCCTCTT     |
| 252 | cgd5_420  | TTCAACTCCAACCTCCATCTTCA   | ATCTCTTTCTTCCAATGCTCCA      |
| 252 | cgd5_450  | CAACGATAGAAGAAGGTCACACA   | AAGAGGATGAGGATGAGGAGG       |
| 252 | cgd5_4520 | GATGTTATGACTGCTCGCTTTG    | AAATGTTGCTGGTGGTTTATTTG     |
| 252 | cgd5_50   | AATTCCTCCTTCAGCATCATC     | GCTGCCCTGGTACTTGTTATTC      |
| 252 | cgd5_630  | TTGAAGCCAAATTCTGATCCTT    | CACCATTTCTAAGTTTCTTGCGT     |
| 252 | cgd5_90   | CGGCTAATCTTTCATTGTTTGA    | TTTGCATTCTTAATCATCGGAG      |
| 252 | cgd5_920  | AATGTGCCCAAAGAATGAAGA     | ATTAGCTGCAACCATCCAAACT      |
| 252 | cgd6_1000 | AATGGAGATGGAGAACAACAGG    | TAGCATTITCTGCCTCCAATTT      |
| 253 | cgd6_1040 | GTGGCACCTGCTTATCATAGAA    | TTCAAGGATGAATTCGCAAGTA      |
| 253 | cgd6_1050 | AAAACCTTTGGATGTGGTTCTG    | TGATCTTCAAAGCTTCTTCCGT      |
| 253 | cgd6_1150 | ACCAGGAACAGTTTAACTCGGA    | CTTATTGCATTGTTGGCTTCAA      |
| 253 | cgd6_1190 | AGAAATGAAGAATCTCGCAAGC    | AGACCCACGGTATCGTTCTTTA      |
| 253 | cgd6_1210 | TTCAACTAACGAAGGCATGCTA    | ATCGGTTCAATCAAATCCATCT      |
| 253 | cgd6_1220 | TCCAACCTGCGAGAAAGAAAAA    | TGTAACACTTTTTCAGCATTAGCCTAT |
| 253 | cgd6_1240 | CATCTTGGTGTAGTCAAACCG     | CCACAAATCGATACTTAGCCCT      |
| 253 | cgd6_1250 | AAACAAATTTTTGGTGGAAGTGC   | ATATTCAGAGTTTTTCAGCCCA      |
| 253 | cgd6_1260 | TGGGTACCTGGGTATCTTTCTT    | ATTTGAGTATTTGTCGTGCCCT      |
| 253 | cgd6_1360 | TACTCTTTTCATGCCAGAACCA    | TCGGACGTAAAGAGTTGTTTGA      |
| 253 | cgd6_1540 | AACTTCGAAGCAATCGAAAAG     | TCAGTTAAGCCACCTGTGAATG      |
| 253 | cgd6_1650 | TCGGGAAAGACCACACTATTCT    | TTCTTCTGTTCCAGGGATG         |
| 254 | cgd6_1660 | GTATGCCCTCCTGGATACACAT    | TTGGAACCTACACATGGCTTTTG     |
| 254 | cgd6_1690 | AGTAAACCAGGTTACGGACGAA    | TGTAGAAATTTCCAATTGGGCT      |
| 254 | cgd6_170  | CAAACCAAATTTCCACAATTCA    | GCCATTCAGCACTTTGTTGTAA      |
| 254 | cgd6_1800 | ATTGCAATCATTGGTTAAAGGG    | TGATGTATGGCTCATTTTCTGG      |
| 254 | cgd6_1880 | AGCAACTGAAAGCCCATCTTAC    | ATTGAATGCCCTTAATTCGAGA      |
| 254 | cgd6_1890 | TAAACTGGCAAACGAACAAAA     | CAGTTGCAATCAAATGGACAGT      |
| 254 | cgd6_1920 | GTAAGTCTCTCCTGACAGGGT     | CGGATTTTAATTCAGCCTTTTG      |
| 254 | cgd6_1980 | GCTTTTCCATCAGAACCTCATT    | TCCAGAAATTTGTTTGCCTGTA      |
| 254 | cgd6_2010 | CGGAAAAAGTAAACGATGAAGG    | GAAAATATGCAGTTTGCACCAA      |
| 254 | cgd6_2050 | AACTTTTGGAGAAAGCAGGATG    | TATCCTTCGCTGTCTGATTCAA      |
| 254 | cgd6_2160 | ATACGGCGGAAGAATATAAGCA    | AGCCAACGCAGATATTTCAACT      |
| 254 | cgd6_220  | CAAGTACAGGAACATCAGCAGG    | CATCACCAGATTGTTGTTTCGAT     |
| 255 | cgd6_2230 | GGGGTGCAGTATTCAATACAGC    | ACCATTTGATGCCCAATAATTC      |
| 255 | cgd6_2330 | ATCCGTGTTTCTGTCTGTTCTTT   | TGCTCTTAATGAAGCTATGCCA      |
| 255 | cgd6_2400 | CGAGTGCAACTATGGATCTCAG    | ATAATATGCATCCGAAACACCC      |
| 255 | cgd6_2420 | TTATTCTTTATGCCACATTGCG    | CAATCATTGAGCTGAATCTGA       |
| 255 | cgd6_250  | AGATTCACCTTGGTGCATATT     | TTCTTCCCATTTTGGAGGGTTTA     |
| 255 | cgd6_2530 | TTAATAAGACTCAAAGGCGGG     | GCTTTGCTCGCTCTTTATATCC      |
| 255 | cgd6_260  | TAGTCATGTTTCTGGAGGGTT     | TAAAGGATTCCACCAAGTTTCG      |
| 255 | cgd6_2600 | TGAATTTCTTGGCATCATTGAC    | GGGAAAGGAATTGCAGTACAAG      |
| 255 | cgd6_2630 | GGATGGATTGACATTTGGTTCT    | GTAAAAGATGCTGTTTCCCCTG      |
| 255 | cgd6_2650 | TGATCCGAAAAGAGGAATAGA     | GTGACGATCAAATCCATGAAAA      |
| 255 | cgd6_2830 | AAGGAAGGAAACACCAAACAAA    | TTCCAACAAGACATGATTCTG       |
| 255 | cgd6_2840 | CAGAGAGGGAGTCAGGAAAAGA    | AGGAGGAAATCTTTGAGGTTCC      |
| 256 | cgd6_2900 | TTTATGTCCTAGAGGGTTCGGA    | ATCCAATTTACATCGTCCCAA       |
| 256 | cgd6_2910 | CTGCAATTTGAATTTTATGGA     | TTTGGTTAGGTTGAAAATTCGG      |
| 256 | cgd6_2920 | TGTTTGATACCATTGGTGCTTC    | ACTGAATCCAAAACAAAGCCAT      |
| 256 | cgd6_300  | AATGGTTAAGAGCTTATTGGTTTGA | AATGCACCAAAGAAACCAAGTT      |
| 256 | cgd6_310  | TCAAATCTGAAAAACAATCGGT    | TCCCTTCTTTCCATCATTA         |
| 256 | cgd6_3110 | GTTCTCCCATTCCTCCTATTC     | CGATGGATTCAACACAATGATTA     |
| 256 | cgd6_320  | AGTGAATAATCTCAAACATCGGA   | GATAGTCCAAGAAGGCTTTCCA      |
| 256 | cgd6_3200 | AGCTCAAAGAGAAGGTGGGAA     | TCTCCATTGACATCATTCCAAG      |
| 256 | cgd6_3320 | ATCTTGAATAAATGTGAGCCG     | TTCCATCCAAGTTACCCAATC       |
| 256 | cgd6_3340 | CCAAACTGGAGAAAACCAAAG     | TACGTGTCTTGGCATCACTACC      |

|     |           |                            |                          |
|-----|-----------|----------------------------|--------------------------|
| 256 | cgd6_340  | GTAGTTGTTGCTGCTAACGGTG     | ACCAAGAAATCCCAAGATTGA    |
| 256 | cgd6_3440 | TTGGCCAGAAAAAGCTGATTA      | CAAATTGATTCGTCAATCCAAG   |
| 257 | cgd6_3450 | TGAGCTGGAACTCACGTTTTA      | ATCCCATAGTCCAAAGCTGAGA   |
| 257 | cgd6_3460 | AAGTTGCTACTGGCCAAGCTAC     | TCCATGCAGGCATTAACATTAG   |
| 257 | cgd6_3470 | ATGGGTGGTAAACAATCAGTCC     | TCTTAAAGCTTCAGCCTCTGCT   |
| 257 | cgd6_3480 | TGAACCAAATGGAATTGTTGAA     | GGCCAATTACCACCAGAATTT    |
| 257 | cgd6_3490 | TCATATTTTCTCAATGGGGTGA     | CACTTCCTTCAGCACCTGTAAA   |
| 257 | cgd6_3530 | ACCCAATTAATGGAGGAGGATT     | AACGATGATCCATCTTTTGACC   |
| 257 | cgd6_3580 | TCAATGATTCATCTCCACAAGG     | ATCCATTGGCTCATAATCCATC   |
| 257 | cgd6_3600 | GAGGCGCTTATTCACCATTTAG     | CATGACGCAGCTTGTTGATATT   |
| 257 | cgd6_3630 | GCTCTTAAAGCTGGCACAGAAT     | CATCATCATCATCAGCGTAGGT   |
| 257 | cgd6_3670 | AATTGGGAAAGGTTGGAATACA     | GCAGCTCAAGAGTTGCAAGTAA   |
| 257 | cgd6_3740 | GAAACCAGGAATTAGGCTTGAA     | TTTAAATCCAACAGAAATCCCC   |
| 257 | cgd6_3760 | CACAAGTTTTTGAAGAGGGAGG     | GCGCTAAATCCTATTGCAGTCT   |
| 258 | cgd6_3850 | TTTTAACCTAAGGCATTTCCA      | CAGCATCTGCAGCAAGTAAAAC   |
| 258 | cgd6_390  | TTTGAGAAGCCGACAGTAACAA     | CTGGAAGGTCTTCATCAACCAT   |
| 258 | cgd6_3910 | TGCAGAATCAAAAAGCTGACAT     | TCTTCACCCCCATTTTCACTAC   |
| 258 | cgd6_3930 | TCAGCAGGAGTTCAAGAATCAA     | TGGCTTCAAAGGTGGTTTTACT   |
| 258 | cgd6_3970 | AGTATCCCAAGCCAAAATGAGA     | GCAAATCTGCAATATGGTTCCT   |
| 258 | cgd6_3980 | AGAGGGTGAAAAGAAAACAGGAT    | TTGTGAAGTCCGAAGCATTTA    |
| 258 | cgd6_4010 | AGCCTAAACTCAAGCTCACGTC     | TGTTTCTCCAGGCTTAATTGGT   |
| 258 | cgd6_4190 | GTGGGGTTTTACTAAGTTCACC     | AGAGATCCACGGCAACTAATGT   |
| 258 | cgd6_4210 | ACAATGGAGGGTGATATGAAGG     | CTCCAATACGAAACTCGAACC    |
| 258 | cgd6_4250 | TTGACGTTAAAGAAATTCGAACA    | TCATACTTTGGAAAATCCATGC   |
| 258 | cgd6_4260 | CAGGGATTGACTATTCAAAATGG    | CGTGATACGTGTCCAGGTTCTA   |
| 258 | cgd6_430  | AGACGATATGGGAAGTATTCATAAAG | AATCCATTAAGTTCCTTTCCAA   |
| 259 | cgd6_4300 | AAATTTGAAAATGAAATTGGCG     | AATATGCGATCTTCCAATTGCT   |
| 259 | cgd6_4450 | AAGAAGTGTGTTGTGGGAGGAT     | CCGAGTCCTTTTGATTGGATAA   |
| 259 | cgd6_450  | TGAAAGATTTAATTGTCATGGAGC   | CTATTTGCATTGCTTGGATGTT   |
| 259 | cgd6_4520 | GAAATCAAGGGGAGAAGGAGTT     | CTCCAAGACTTTGCTAGAGGA    |
| 259 | cgd6_4560 | CAATTCCTCAAGGTTTGGAAAG     | TATGCTTAGCAGCAGAGCAAAG   |
| 259 | cgd6_4620 | ACCATGACTACGAGGGAGTTGT     | TGACAACATTTGATGGGTGAAT   |
| 259 | cgd6_4690 | CTCCAGACCCCAATTTAGTCAG     | CCTTGAACAGTTAAATCCTGGC   |
| 259 | cgd6_4820 | TGCGAAACCAAAGTAACAGTTG     | ATTTAATCCCCATCCAAAAC     |
| 259 | cgd6_4830 | TTCATCTAGAAGTCCGACAGACA    | ATCCCTGATTTGAGACCAACTG   |
| 259 | cgd6_4860 | AAGTAGGATTAGGCATTTGGCA     | TACATTTTCCATTAATTCCCGC   |
| 259 | cgd6_4980 | GCTCCACTAAATATTCGCACAA     | CATTGCCAGTAAAAATGACTGC   |
| 259 | cgd6_5100 | TCTTTTCCCAAGCTCAAACATT     | TTATGAGAATTGGAAGTCCGGCTT |
| 260 | cgd6_5120 | GCAATGATGTTGAAGAATACGC     | ATTCCTTGAAGTGGAAAGCATTGT |
| 260 | cgd6_5220 | ATTTGGCAGAATTCATGGTTT      | CAAGTGTACCTCCATTTTCCAAG  |
| 260 | cgd6_5230 | GATAATTTTGGGATGAATTTCTCAA  | GGACCGTAACTGCTTCATTTT    |
| 260 | cgd6_5270 | CGAAATCTGCACACTTCTTTG      | AAGTACTCGGATGCAGCTTGTT   |
| 260 | cgd6_5430 | AAATCATCTCGCATTCCAAGT      | AAAGTTCACGAATAGCCGATGT   |
| 260 | cgd6_5470 | TCCTCCAAGTAATCGCAGAAAT     | TTAAGGCATTCCGAACACTTTT   |
| 260 | cgd6_550  | TCCAATTTCTGTTGAAGTGTG      | CTTCAAATGACTGGATTGGGTAG  |
| 260 | cgd6_5500 | CCCCTGTAAAACCAATGATGT      | TTCTTGAATGGAAAGTTCAGCA   |
| 260 | cgd6_630  | AACAAATTTCCAGGTGGATAC      | TGAAAATGATAACTTGCTTGCC   |
| 260 | cgd6_660  | TTGGTATTGCCAAAGCTAAACA     | AGCTTCATCATCATCAGGAGGT   |
| 260 | cgd6_700  | CCTTTTAGATGGGTTTTATTTCCA   | TGCAAAGGCCATTTCAATATAA   |
| 260 | cgd6_750  | GGAAGAATTGGTGAATCGAAA      | TTGGTAAAGCTCCAAAGTTTTCA  |
| 261 | cgd6_810  | TTTCAAATAGGCCAAAAAGGAA     | ACTTGTTGGGGTACATCCAGTC   |
| 261 | cgd6_830  | CAACCATCCGGGTGTATTAAGT     | GTTTCCACACGTGTTACAGCAT   |
| 261 | cgd6_860  | AAAAGTTGGCTTTACCTGTGGA     | TTATTAAGTTCCTCCTCCCG     |
| 261 | cgd6_880  | TCCAAGCTCAGGAATTTGTAT      | TCAAATTTTGGCTTTGGTCTTT   |
| 261 | cgd7_1030 | TGATTGTGAAATGGTAGGATGC     | TCCAAGTAAGTCCACTCCATT    |

|     |           |                            |                          |
|-----|-----------|----------------------------|--------------------------|
| 261 | cgd7_1040 | TGGGATTAGAAAACCTTCCTCCA    | TTCTACAGAAAGCTGAAGCTGAAA |
| 261 | cgd7_1050 | TAAGGACGGAATTCCCTATGAA     | GCATGTCCTTTTTCTAAATCAAGC |
| 261 | cgd7_1070 | TGGTAACAGTGGAGCTCAAGAA     | GATCCCAAATGAATAAAACTCTCG |
| 261 | cgd7_1080 | TGTTGTGGATCCTTCATTTTCA     | TTTCACATGGACTTGCAACAAT   |
| 261 | cgd7_1100 | AAAAGTGGAGTTGGTGGAAAAA     | TTCCAAAGAATTGGATTTCACC   |
| 261 | cgd7_1120 | AGATTTGAGTTTTGGCGATGAT     | GACAATTATGCCTGTGGCTGA    |
| 261 | cgd7_1170 | GCTTTGGGTGAACATCTTTTTC     | TATTGGAGGCTTGAGGAACATT   |
| 262 | cgd7_1210 | TGTTGACGAAGATTTCTTGAA      | ATTTGAGGGAGATTGCAGTGTT   |
| 262 | cgd7_1310 | GGCCTAAAGAAAATTGGATTGA     | ATTTACCAGATTCTTCCCACCA   |
| 262 | cgd7_1330 | ATACTGGAAAACTGGAGCCAA      | TTCTGCTGTGTCATTTGCTTCT   |
| 262 | cgd7_1340 | GGCTGTTATTTAACTGGTGGC      | AGCCAACCTTTTGACCAATAGGA  |
| 262 | cgd7_1360 | AGAACAAATTGGACGCAAGATT     | AAGCTCATTTAAAGCGGTCAAG   |
| 262 | cgd7_1380 | GATTCAGTTTCGATTCTTGGG      | AAGCTTTCGCTGATTAAGCTGT   |
| 262 | cgd7_150  | AGCTGAGGTATGGACCGAACTA     | ACAATGTCCCGAAGCTTTGTAT   |
| 262 | cgd7_1520 | AACTTCAAGAGTACAAATCCGTTCTT | CTTCATCCGGATCATCGAGT     |
| 262 | cgd7_1530 | GAAGTTCAGTCAGGGGAAGATG     | TATTTGCCTTGGTAATCCATCC   |
| 262 | cgd7_1560 | CAATCCACCTTGCTCCATAGAT     | GATACATGTTCCCTACCCAGGGA  |
| 262 | cgd7_1570 | TGAAAACTTGCAAAGACTGGA      | ATGGTCTAAATCGCTGAGAGGA   |
| 262 | cgd7_1600 | GCGGGGAAAGAGGTCTTATATT     | CCTTCTCTACCAAATCCATCG    |
| 263 | cgd7_1620 | TTCCATTTGGATTATTTGAGCC     | ATCTGAGCCACTTCCATTGATT   |
| 263 | cgd7_1660 | GCAGTGGGAACTACCAACTTTC     | AAGTCCCCTTTTCGATAGTCCA   |
| 263 | cgd7_170  | CAAAAATTGTATGTGGAACGGA     | TTTTCAAACCCATCAACAAATG   |
| 263 | cgd7_1740 | TTGAAATGACAAATTTGCTTCG     | CCTCAATTTTTGGACTACCAGC   |
| 263 | cgd7_1870 | GCAAAACGAGACAAGATCACAA     | CAGAACCATTAAGGGAACGA     |
| 263 | cgd7_190  | CTGTTAGAGCTGGAGAGAAGGG     | AAATTCGTTTCGCTTCTTTGATT  |
| 263 | cgd7_20   | ATAAATGGTCGCCACTTCATTC     | CGCACTCATGAATATTGCAGTT   |
| 263 | cgd7_2060 | TTAAAAATTCCTACGGAGCAA      | TGCAGAGTCCAAGTCTCCACTA   |
| 263 | cgd7_2150 | TTTCGATCGACACAGGTAACAT     | TGCTTGCTTTAAAACATCTCCT   |
| 263 | cgd7_2180 | TACCTAACAATGCAGGAGCCTT     | GTCGAAAGGAGTTTTTGGAGAA   |
| 263 | cgd7_220  | GGAGGCGTTGGTAAAACCTACAC    | TGCAGTATCCCAAACATTGAAG   |
| 263 | cgd7_2220 | AAACAGCAGGCTCTCCATTTAG     | TCTCTGATTCCATCGGGAGTAT   |
| 264 | cgd7_2230 | TAAATCGCATGGAAACACAAAG     | TCTGGAAGTTCATTATCACCCC   |
| 264 | cgd7_2240 | TAAAAAGAAATCTTACGGGCCA     | ACGATTCTTCGGTATTGTTGCT   |
| 264 | cgd7_2250 | GGCACCTCAGTTAATTTCCAAG     | TCTTACTTCAACGCCTGCATAA   |
| 264 | cgd7_2350 | TGAAGTAGTGCTTTCCTCTCCC     | AATGTGTGCAACTTACCTGGTG   |
| 264 | cgd7_2390 | ATTCAACAGGACTGGGAGCTAA     | GCTCAGCCAAAATCTTTCAGT    |
| 264 | cgd7_2420 | TGTATTGAGCGAAGTCCAATG      | TCACTCTTCACTGCTTCGTTA    |
| 264 | cgd7_2630 | AGGCCAGATTTCCCTAAACTTC     | AGGCTTCCATTGCTTCATACAT   |
| 264 | cgd7_2730 | AAATGCAGAAAATGTTGCAATG     | CTCCTGAAATAACCGCAATAGG   |
| 264 | cgd7_2800 | GACACCGATTTTTTCATCCAAAT    | CTCCGCATCTTAAAATGTTTCC   |
| 264 | cgd7_2810 | TTTAAATGCCACAGGATGTCTG     | CCAAATTGTCGAGTTCATGTGT   |
| 264 | cgd7_2890 | TTGCCAAAAGTAATGGATTGTG     | CCATATCAGCATGCCTTTGTAA   |
| 264 | cgd7_2940 | AACTGAAGACCCCGATTTCAA      | TCCATTTAACAAGTGGCATCAG   |
| 265 | cgd7_3020 | GGACCTCCTCCTCAGGTAGTTT     | AAATCCAGTGTGAAGCCAAAAT   |
| 265 | cgd7_310  | CAGATCTCTGCTTTCCTGACT      | TTAGGCCTTCAAGAAATGCTTC   |
| 265 | cgd7_3150 | ATATCGCAGGTTTCATTATTGGG    | TCCAGGAGAATAGGAAAAACCA   |
| 265 | cgd7_3210 | TGTGAATGCTCCTTCGAGACTA     | TCCTCCGTAATGAAGGTTTGT    |
| 265 | cgd7_3240 | CATTATTTAGAATGCGGTGCTG     | TGAATCATCTTCTCGTCCTCTT   |
| 265 | cgd7_3260 | AAACATATTGGGACAGACTGGG     | TCAAGTTGCAGCTGCTCATAAT   |
| 265 | cgd7_3300 | TGTTGGATTTCAAGAGCTGGTA     | TAATTGGAGGTGAGCTGGATTT   |
| 265 | cgd7_3310 | AGACAGGGTCAAAGATCAAACC     | CTTAAAGCGTAATTTTCTCCGC   |
| 265 | cgd7_3330 | GCCACATCCAGACACTGTTAAA     | GTTTCCAAAACCGATTGATGAT   |
| 265 | cgd7_3430 | GCCTAGGTATATGGCACCTGAG     | TATAGAGGGGTGGAACCATGAC   |
| 265 | cgd7_3500 | ATTCTGATCTTTTTGGCGAGAG     | TCCCGAAATAATTTGTAGGCAG   |
| 265 | cgd7_3550 | CGCTGTCTTGGATGAAGATACA     | TCAAGTGGCATACCAATCTCAC   |

|     |           |                          |                            |
|-----|-----------|--------------------------|----------------------------|
| 266 | cgd7_3570 | TCAGGTATTTTCATCATTACGCG  | CCAGTAATAAATGAAGAGGCGG     |
| 266 | cgd7_3610 | GATGTAATTTGCGCGTTATCTG   | CGGATGTATAATGTGCCTGAGA     |
| 266 | cgd7_3690 | AAGAAAACACTACGATTTTGCCCA | ATGAGCGACGTGGGTACTTTAT     |
| 266 | cgd7_3720 | TGTGGGCTTATTTGTATTGCAG   | TGACATTGCCATTAACCTTTGG     |
| 266 | cgd7_3740 | ATTCGAAGCAAATCACTCCAT    | CAATGGATCAATATATCCGCCT     |
| 266 | cgd7_390  | GATTTCAACAAAGAAGCAAGGG   | TCAATGTTGTTGGAGGTGTTGT     |
| 266 | cgd7_4000 | TGAACTGCAGCAAATGAACTT    | TGCAATTGAATTAACCTTGGTGG    |
| 266 | cgd7_4060 | GGTGGTTACCGAAAGAACAGAG   | GGCTTGGCTTCAATATACTGG      |
| 266 | cgd7_4270 | GGACGTAATTGCTCCTTCAATC   | AATACAAGTGGACATGCTGTGG     |
| 266 | cgd7_440  | ATTTGGAATTCAGGTCATGGAG   | TCCTCTTGAGTTGAATCGTCT      |
| 266 | cgd7_4430 | TCTTTCCCGCAATCTTTAATA    | TCATTCTTGGGCTCATCTTTTT     |
| 266 | cgd7_4510 | GAAACTGGCCATATCAAGGAAG   | TCAGCTTCCACAAGTCTCAAAA     |
| 267 | cgd7_4550 | TTTGAGCCTGAAAATACGGTTT   | TATCGTGCATCCAGCTGTTACT     |
| 267 | cgd7_4770 | TAAACCAAATGAAGTCTCTCGT   | TTCATCAATCTTCCAGTCTCA      |
| 267 | cgd7_4800 | ATCTTTTTGCCAGGAACGTTTA   | CTTCCCCAAACTCTCTCTGCTA     |
| 267 | cgd7_4850 | AAAGGCGAATCTGAGAGCATAG   | CCCTAAAAGCCTTTCTGGACTT     |
| 267 | cgd7_4890 | CCTATTCAAATGATCCAGCCTT   | GTGGGAAAGAATCGAAAACATT     |
| 267 | cgd7_4990 | TCAGGATCAATTGCTGCTTCTA   | TGTGAAACCGATACTGGTTGAG     |
| 267 | cgd7_5070 | CATATTCGTTTTCTTCAAGCCC   | AGGATTTTCTAGTGCAGCGTGT     |
| 267 | cgd7_510  | TGTCCAAAGTGCTCATTTTCTG   | TCCTTCCATTTGAAGTCACATT     |
| 267 | cgd7_5160 | CCCATATAGAGGCCAAGCATT    | TGTATCCCAGCTCTTTTTTCTC     |
| 267 | cgd7_5320 | ATGTATGCCAATCATGCGTAAG   | ATTCTCCATGAAATGATCCCTG     |
| 267 | cgd7_540  | TGGATTCTTGAAAATCTTTGGA   | TAACCTTATCCGGATTTGGGG      |
| 267 | cgd7_5400 | AGGATCTACAAACCCAGCTGAA   | TGCATCATATCTGGGAAACTTG     |
| 268 | cgd7_550  | TGTATTTTAGCATTGGCTGTGG   | CATGAAGTGCTTTCTCCAAACA     |
| 268 | cgd7_570  | GTTTTGGGAGAAGCAATTTACG   | ATAAACTCGCATAGCATTGGCT     |
| 268 | cgd7_590  | GTTTCCCCTGAATTGAGGTATG   | AACAAGCTCTCCTTGACAAAGC     |
| 268 | cgd7_600  | ATTCAAAAGCAATGGGATGATT   | CATTTGACTTGGATCCCTTTTT     |
| 268 | cgd7_610  | ACCAACTAGAATCATCATGGGG   | AGTCAATATTCATTGCGGCTTT     |
| 268 | cgd7_800  | GGAGTCCATGTATTAACCCAGC   | ATTTACGTCGTCGGAATCTTGT     |
| 268 | cgd7_810  | TGGATGGATATCAATGGTCTCA   | CAAATAGTCCGGAACCTGGAAG     |
| 268 | cgd7_850  | GGAGAATTAGAGGCTTGGAGGT   | ATAAACAAGGGGCTGTAAGCAA     |
| 268 | cgd7_870  | ACAGAATGGGGAAGTAAATGGA   | CAATTTGAGTTTGGAGCTCGTGT    |
| 268 | cgd7_890  | CCCTTCAAAGGTTCACTACTCG   | CTGATATGGATGAGAATTGCCA     |
| 268 | cgd7_990  | TCTCTCAGAGTTTATTGGCGAAC  | ACTCATGGGAGTGGAGATCATT     |
| 268 | cgd8_1070 | AATACCAGAACCAAACCATTG    | CTTCTTTCAAACCTGGTACGG      |
| 269 | cgd8_1100 | TGGGAGCTTTGCCTTATATTGT   | ATTTTCTCCCAACAATCCTTGA     |
| 269 | cgd8_1110 | TCAATCTGGCTTGAATCTGTTG   | GGCCATACCATTACTCATTGC      |
| 269 | cgd8_1130 | AGAGTTAGCATTGGATGATTGG   | TGTTGATCAGGTTTATATTGATT    |
| 269 | cgd8_1140 | GGGAGTGGTATTGGTCTTAAACA  | TTTTTCTAATCCCAAACAATCAA    |
| 269 | cgd8_1190 | AGCAGGAAATGAACAATTGGA    | AATCAGAAAGATCATCAATAATCGTC |
| 269 | cgd8_1210 | GTAGGTGGAATTTCTGCCACA    | TAAATGCAAATCCAAATGCTTG     |
| 269 | cgd8_1250 | CCAAATCCAAAGTCAACACTCA   | CCATTTTGAGAAACGCATGTAA     |
| 269 | cgd8_130  | TTAAATTTTGGGGCCATGATAC   | TGGGTCTTATACTTTCCGCTA      |
| 269 | cgd8_1300 | CCCAAACTTGATGATGAAATG    | ATTTTGTTTTCCAGGTTGATCGT    |
| 269 | cgd8_1310 | AAGGGATATTCTTAAGCTGGGG   | TGATTCATTTCCAGGTCCTTCT     |
| 269 | cgd8_1340 | TTTCTACCCCAAGAACTTCCA    | TGTTTTCAAAGTTGTGTTTGCC     |
| 269 | cgd8_1390 | CTGGTACTTTTTCCAGAGCAA    | TGACCAGGAACTACGTCATCAG     |
| 270 | cgd8_140  | CAGGAAGGGTATCAGGAGTCAC   | ATTTGACCTGCTCCAACCTTGAT    |
| 270 | cgd8_1410 | TGGAAGTCACTTTGGACTGATG   | TTCTTTTTCTTCTTGCCATA       |
| 270 | cgd8_1420 | TGACAATTCGAATGAGACGAAA   | CCAATTTTTCTGGATTTACCGA     |
| 270 | cgd8_1460 | CAAGTCTTGGAGTTCTATGGG    | GCTCTTGGACTGATAATGGACC     |
| 270 | cgd8_1470 | TTAGTAAGGGAATTGAAGGAGCC  | AAAGAATATCCACCTGGGCTT      |
| 270 | cgd8_1480 | AGAGAATGCTCAATATCCCGA    | TAAAGATTCAATTGGGGAGGAA     |
| 270 | cgd8_1490 | GCGTCAGAACTGGCTTACTTT    | ATTTCCGAACCTCCTTCTTATT     |

|     |           |                           |                           |
|-----|-----------|---------------------------|---------------------------|
| 270 | cgd8_1550 | AATTTGAAATGGAGGATGGAAA    | AACCCCAACCTTCAAATTAACA    |
| 270 | cgd8_1640 | TGGTCCAACAGTACAGCAGATT    | CGAAGATTCCTTTCAAGTCGAT    |
| 270 | cgd8_1810 | AATTGCTATGGAAAAGGCAATG    | GAAATTTAGCCCATTTCTGTGTC   |
| 270 | cgd8_1820 | CAAGAATGCTCCAGTCTCACAG    | GTTATAAGGTTGATTGCGAGCC    |
| 270 | cgd8_1920 | TTGGAATTATCAGCCCAATTTT    | ATATGAATGAATGGTTCCAGCA    |
| 271 | cgd8_1950 | AAGTCTGATCAAAGAGGGCATT    | CTCCAGCTCAAGCTCTAATTCA    |
| 271 | cgd8_2230 | AAGAGCCATGGAACTTCAAAT     | AAAGTTGGTGTGAGGAAGAAATG   |
| 271 | cgd8_2240 | CAAATGCGAGAAACAATTCAA     | CATGGTACTTTCAGCATGTCTGT   |
| 271 | cgd8_2280 | TCATTAACAATGATAGCGGGAA    | AATAGCAATCCAAGATCCTCCA    |
| 271 | cgd8_2290 | TAAATTGCTCAATGAACGGTTG    | CAGATTCATAAATGTGCTCCGA    |
| 271 | cgd8_2310 | TTGCAATTTTTAGATTGGTGGTT   | GACCTAAAAGGAATATTGAAGGAGG |
| 271 | cgd8_2350 | TTGGTTCAAACGTATGATCAGG    | AGGACATTTTCTGGAGGTTTCA    |
| 271 | cgd8_2400 | AAAGGATTCCCAAGGAAAAAGTT   | GCAGCCTCTGCTTGAAGTAAAT    |
| 271 | cgd8_250  | CCCAAGACACAAATAATGGGAT    | CAACCTACGATCTGTTCCCTCC    |
| 271 | cgd8_2570 | GCCAATTCCAGATTGTTTTAGC    | TCTTGAAATCCACCATTATCC     |
| 271 | cgd8_2590 | TCTTCTGTTTCTTCTTTCGTCC    | TCACTTACCTTGGTTTTGTCA     |
| 271 | cgd8_2600 | GAGCTTAACCAGAGGTGATGAAA   | TCAAACAAAGGTGAATCATTGC    |
| 272 | cgd8_2610 | AGGTTTAGGGATATCTGCGACA    | TAGTCTTTGGGTGACGGGTACT    |
| 272 | cgd8_2680 | TACAAGCGGAATGAGAATAGCA    | ATGGAATGAGCATTTCAGGTTT    |
| 272 | cgd8_2690 | TTGTTGTTGGAATGTTTTAGC     | TCATTTCCACTAATCTCGGGTT    |
| 272 | cgd8_2740 | CCCGGATAAAGAAATGAATCAC    | CCATTAATAACCGTTCCCTGCTC   |
| 272 | cgd8_2900 | TAATGGCAAATTTATTCCCGAC    | CAGAAAATGCAAAAATTCCTCC    |
| 272 | cgd8_2920 | TTAAATTCTGGCCATTGAAGT     | AAAGTCCCAATTATTGAGCGAA    |
| 272 | cgd8_300  | AGAAAACAAACGGTTGAGGAAA    | CCGAGTCTGTGAGCTAAAACCT    |
| 272 | cgd8_3010 | CAATGCAAAACACCACTTGTCT    | CAGCCAAATGTTTCCATGAGTA    |
| 272 | cgd8_320  | ATTGATCCCAACCCAATAATG     | CTAACAAAACAGGATGGCTCC     |
| 272 | cgd8_330  | CAGGTTTAATGAGACCAGAGGG    | TACGTATTGGAAGGAGCCAGAT    |
| 272 | cgd8_3340 | TCTGAAAAGAAAAGCGAAAGGT    | CAACGGATTTATATCGGGAAAA    |
| 272 | cgd8_3400 | ATGATGAGCCTCTATTACCCGA    | TGGGTAAATTCATTTTTCCAG     |
| 273 | cgd8_3550 | TTATGGAGAAGCAGGGTTTTGT    | TCCTACGATTGAATTCGTTTTT    |
| 273 | cgd8_3570 | CGAGCCTAATTATTCCAGGATG    | CTTGGTATCCATATTCGGGAAA    |
| 273 | cgd8_3630 | GGGAAGGAGTTTGTGGTACAC     | CATTTTCAAAGTTTTCCCATCC    |
| 273 | cgd8_370  | AGTTTTTGCAGGTCAGGACAAT    | TTAGCTGGATTGAAGGGACAAT    |
| 273 | cgd8_3700 | TACTCAGTGGTATCTTTGGGCA    | GCTCAACGTTCTGGATTTCTTT    |
| 273 | cgd8_3810 | TCCTCCAACTGGATTAATTTG     | AATTCCAAATTTGCTGAATCG     |
| 273 | cgd8_390  | CTTGGGACGAAGAACTATTGC     | GATTCATCAATTCGGTTGGAAT    |
| 273 | cgd8_3990 | GCCATCATAACTCACCGTTCT     | TGTGACGATGATGAATGAGATTT   |
| 273 | cgd8_400  | CAATCAAGAACATGATGGTTGG    | ACAACAACCTCCTGGAAGCATCT   |
| 273 | cgd8_4060 | GGAAGACTCCACAGACAAAAGG    | AAGCTCAAGATATGGCACCAGT    |
| 273 | cgd8_4250 | CGTAGAATTTCCCATTTTCAA     | CAATTATTACGGTTGCTCCACA    |
| 273 | cgd8_4310 | TGCATTTGCTCCAAATAGTGAA    | TAAAGCCAATACATCCTGGAGC    |
| 274 | cgd8_4350 | GGTTCCTCCAAGTGAGTCAAAG    | ATTTCAATGCCTCGATCTTAGC    |
| 274 | cgd8_440  | GGATCGTATTCTTGGAAAGCAC    | CTAACGTATTGGGACTTCTCGG    |
| 274 | cgd8_4510 | TATAGGAAGCCAACAGCCAAAT    | CTCGTTTGATCCCCATTATTA     |
| 274 | cgd8_4560 | ATGGGGTTTTCCAGTATTTTCCAG  | TTCCATAGTGCTTTGAGATGGA    |
| 274 | cgd8_4580 | AGGGAAAACAACAAGATGGTTC    | TTTCTGTTTCAAAGTTTAAACGCAT |
| 274 | cgd8_4590 | TTTAGGACCTTTGGAAAATTGGT   | CAAATCCTTCAATCTTTTCCCA    |
| 274 | cgd8_4600 | AGCAAGAACAAGAGCAAGAACA    | AGTTCCACGTGATTTGGTCAA     |
| 274 | cgd8_4610 | ATGGCATTTTTCAATTACCAGG    | GGCAAATCAAATTTCAATGGTT    |
| 274 | cgd8_4670 | AAGGATTTTCAATCAATAATCAACA | TTTCGCTCACAACTGACCAC      |
| 274 | cgd8_4680 | AAGGTTCAAATGCAAGGAAAA     | CTACCCATGGAGAAGTAATCGC    |
| 274 | cgd8_4690 | ACGAGGGTATTGAATTGAAGGA    | AGTTCCAAGGCTGTCAAATGT     |
| 274 | cgd8_4700 | CAAGGAGCAGAGGCTGTAAGTT    | TTGGGCAATTTATTCTTTTTG     |
| 275 | cgd8_4720 | AGGCCATCGTGGTACTTTTTTA    | TATTTGAATCAACCTCGCCTTT    |
| 275 | cgd8_4750 | AGCTGCAGCATTACCACTCATA    | TTACAACATCCTGGTTTTGACG    |



|        |           |                           |                         |
|--------|-----------|---------------------------|-------------------------|
| 275    | cgd8_500  | GTGCTTCCAGACTTGGTCTTTC    | AAATGGCATTATCTCCATCACC  |
| 275    | cgd8_520  | AATTCAGGAATTCAAGACGCAT    | TTCTTCGCATCTTTCTTGTTCA  |
| 275    | cgd8_540  | ATTCGCTTTTCATCTGGTCATT    | TTTTCTGATAAGCTCCACCACA  |
| 275    | cgd8_550  | AGAAGCTTCGTTCTGCAGACTT    | CGAACTGTGCGAACTGTACAAGC |
| 275    | cgd8_560  | GGAGATATTTCTGGTCATTGGC    | TAAAATCGGCCACATTTCTTCT  |
| 275    | cgd8_580  | TCAGAAAGGGCAAGCTACTGAT    | CAAAAATAGTACACGCCCCAGGT |
| 275    | cgd8_650  | CTGCAACTAAGGCAAATGCTAA    | AAAGTTTCAACCATCTTCATTGC |
| 275    | cgd8_670  | AATTTCCAGGATTTAGCCAGAA    | TTCAGCAGTCAATTTTTCGATT  |
| 275    | cgd8_680  | TAGTTCGTCGGGAGATTTGATT    | GAACTACTGGTTTTGCTGGTCC  |
| 275    | cgd8_700  | CTCCCACGATAAGCAATAAAGC    | CTCCTCCATTTTAGCATCCAAC  |
| 276    | cgd8_750  | GCAAGGAGCATCTGGATTTTAC    | TAAGCGCTAATTCTCCAAAAGC  |
| 276    | cgd8_760  | TGTTAGTTCCAAAAGGGTCGTT    | GGGAGGGAGCATATAGTCATTG  |
| 276    | cgd8_790  | TGTTGATGATACATGCGTTGAA    | TCCTGTTCTATGGTGTGGAGTG  |
| 276    | cgd8_830  | GAAGAGAAAAAGGATGAGCCAA    | TCCTAGGATCCTCACCTTCTGA  |
| 1 & 46 | cgd2_1300 | TCGGACTCTTCTCCAAACTCTC    | CTGCGCTCCATAAATCACATAA  |
| 103 &  | cgd1_3660 | CATTTTCCAAGCTCATTACAAA    | TTGGTTTTCGATTCATACACTGC |
| 103 &  | cgd1_3680 | AAACTCAACTTAGCATGGGACG    | TCCATTTTGGCATGGATTATTT  |
| 103 &  | cgd1_3690 | TCTCAAGGGTTGAAGCAAGAAT    | CAATAAGAATGGCATGGGACTT  |
| 103 &  | cgd1_3700 | TCATCTCGCTGTTGGAAGTAGA    | GTATGATCCCTTCCTCCTGTTG  |
| 103 &  | cgd1_3710 | TTTGGATGTGCTGGAGATATTG    | TGGAGCAGCGTAAAAATGAGTA  |
| 103 &  | cgd1_3720 | TGTTTTTGGTTGCATTATCAGG    | TAAGAATCGGGGTAAATGATGC  |
| 103 &  | cgd1_3730 | TACGACCAACCACATGCTTTAG    | TCCATCAAAGCTGAGCAAATA   |
| 103 &  | cgd1_3740 | GATGGAAGATGATGGAATGGTT    | TCTGGGTGATTGTTTTTGATTG  |
| 104 &  | cgd1_3760 | TCTCTACCTTTGGACGTGGAAT    | CCATATCATCGGCTCCTCTAAC  |
| 104 &  | cgd1_3770 | GTGAGTTCAGCAGGTACATTGG    | ACTGGGTTGCTATTGATGTGAA  |
| 104 &  | cgd1_3780 | ATTTTGGGGTTTTTCTCATT      | GATTCCGCACTATTATCCTTGG  |
| 104 &  | cgd1_3800 | GATGGCATGGAGAATTAGAAGC    | TACAGGCGGCTTTTTCTGTAGT  |
| 2 & 46 | cgd2_1400 | TCGCAATTCAAGTCAGAGGTT     | GTTCTGCAAGGTTGTTTGCTATT |
| 2 & 46 | cgd2_1480 | TTCGACATTAGACTCGGTTAGGT   | CCTGCTCCACTACAGCTATGAA  |
| 2 & 47 | cgd2_1600 | CAGCTATGCAATGTTTGGAGAA    | TGCTTGGATGATTTGATCTTTG  |
| 3 & 47 | cgd2_1650 | AGCAACATTTACTAGCGACGG     | GCTGTCAATCAGCTTTCTGTGT  |
| 3 & 47 | cgd2_1660 | ACCGCAACTTAATGGAGAGTATG   | GTCAGCAATAGGGTTTTGAATGA |
| 3 & 47 | cgd2_1960 | CATGGTTCCAATCAAAGTAGCA    | TATTCCTCCAAGCTCCAGACGA  |
| 6 & 48 | cgd2_2080 | TCGAATGGTAAGTTTGGTAATAGGA | TGACTTCTTCTGAGCGAGACAA  |
