# Supplementary material for: The Cryptosporidium Parvum Transcriptome during In Vitro Development
Source: PubMed Central journal article supplement (PMC3305300; doi:10.1371/journal.pone.0031715), 2012-03-15
Supplement: pone.0031715.s006.pdf [file pone.0031715.s006.pdf]

### Supplemental Table 3. 107 Genes with a Peak Expression <80%

\*For genes with differing annotations between cryptogenome.umn.edu (CG) and www.cryptodb.org (CDB) both are listed.

| Peak hr | Gene ID   | Annotation                                                                                                                                                                                                           | Functional Designation   | Peak % | Peak magnitude |
|---------|-----------|----------------------------------------------------------------------------------------------------------------------------------------------------------------------------------------------------------------------|--------------------------|--------|----------------|
| 6       | cgd1_780  | hypothetical protein                                                                                                                                                                                                 | hypothetical             | 83.85% | 1.78E-04       |
| 6       | cgd5_2640 | hypothetical secreted protein, signal peptide                                                                                                                                                                        | interacting              | 89.44% | 2.76E-02       |
| 12      | cgd1_1870 | CG: possible domain similar to KOG4364, pFam02166, COG3064, KOG2897, KOG1029<br>CDB: hypothetical protein                                                                                                            | apicomplexan             | 87.43% | 2.53E-04       |
| 12      | cgd6_4460 | CG: protein kinase CDB: Ser/Thr protein kinase                                                                                                                                                                       | apicomplexan             | 86.53% | 2.28E-04       |
| 12      | cgd1_140  | CG: phosphoglucomutase [EC:5.4.2.2] CDB: phosphoglucomutase, tandemly duplicated gene                                                                                                                                | Cryptosporidium specific | 86.11% | 4.00E-06       |
| 12      | cgd7_4020 | CG: Protein kinase, CAMK/CAMK1 family regulated by Ca and calmodulin CDB: calcium/calmodulin dependent protein kinase with a kinase domain and 4 calmodulin like EF hands                                            | Cryptosporidium specific | 85.58% | 3.97E-03       |
| 12      | cgd1_110  | CG: Possible Zn binding motif (Znf_RBZ), transcripts identified by EST CDB: little finger (CxxC...CxxC) domain containing protein                                                                                    | hypothetical             | 91.42% | 1.43E-04       |
| 12      | cgd1_130  | hypothetical protein, Possible 2 transmembrane domains                                                                                                                                                               | hypothetical             | 81.90% | 4.80E-03       |
| 12      | cgd2_3310 | predicted secreted protein, signal peptide, paralogs                                                                                                                                                                 | hypothetical             | 91.30% | 1.43E-05       |
| 12      | cgd4_1020 | hypothetical protein                                                                                                                                                                                                 | hypothetical             | 93.84% | 1.85E-04       |
| 12      | cgd4_2340 | CG: possible Ca binding protein, limited similarity to myosin tail CDB: myosin regulatory light chain                                                                                                                | hypothetical             | 81.97% | 3.00E-05       |
| 12      | cgd5_1520 | CG: myosin A tail domain interacting protein (MTIP), EF-hands CDB: EF-hands domain containing protein                                                                                                                | hypothetical             | 83.54% | 4.33E-05       |
| 12      | cgd5_2740 | hypothetical protein                                                                                                                                                                                                 | hypothetical             | 84.59% | 5.00E-05       |
| 12      | cgd5_2760 | CG: similar to hypothetical protein, signal peptide, transmembrane domain at C-terminus<br>CDB: hypothetical protein possibly conserved in apicomplexa, signal peptide, transmembrane domain at C-terminus           | hypothetical             | 87.89% | 7.77E-05       |
| 12      | cgd6_3130 | CG: Signal peptide, Predicted membrane associated protein paralog of the Cryptosporidium-specific SKSR family CDB: conserved hypothetical protein                                                                    | hypothetical             | 92.41% | 2.67E-03       |
| 12      | cgd6_3510 | CG: Cryptosporidial mucin, large thr stretch, signal peptide sequence, transcripts identified by EST CDB: cryptosporidial mucin, large thr stretch, signal peptide sequence                                          | hypothetical             | 91.97% | 3.00E-05       |
| 12      | cgd6_4000 | hypothetical protein                                                                                                                                                                                                 | hypothetical             | 81.63% | 2.00E-06       |
| 12      | cgd6_4950 | CG: hypothetical protein, signal peptide, secreted CDB: conserved hypothetical protein                                                                                                                               | hypothetical             | 82.30% | 7.00E-07       |
| 12      | cgd7_1960 | CG: hypothetical low complexity protein CDB: Low complexity protein with coiled coil regions                                                                                                                         | hypothetical             | 80.66% | 1.02E-03       |
| 12      | cgd7_2780 | hypothetical protein                                                                                                                                                                                                 | hypothetical             | 81.03% | 1.07E-04       |
| 12      | cgd7_3830 | unconventional myosin                                                                                                                                                                                                | hypothetical             | 84.83% | 9.00E-06       |
| 12      | cgd7_4300 | CG: similar to hypothetical protein, 3 transmembrane domain Membrane associated RING finger domain CDB: conserved 3 transmembrane domain membrane associated RING finger domain (shared by plants and apicomplexans) | hypothetical             | 84.43% | 1.42E-02       |
| 12      | cgd7_4720 | hypothetical protein                                                                                                                                                                                                 | hypothetical             | 85.23% | 6.11E-04       |
| 12      | cgd8_1130 | signal peptide, predicted secreted protein with a cysteine cluster at the C-terminus                                                                                                                                 | hypothetical             | 80.50% | 5.20E-05       |
| 12      | cgd8_3120 | hypothetical protein having a signal peptide                                                                                                                                                                         | hypothetical             | 85.22% | 1.00E-05       |
| 12      | cgd8_3830 | uncharacterized low complexity protein                                                                                                                                                                               | hypothetical             | 84.03% | 3.00E-06       |

|    |           |                                                                                                                                                                                                                                                                                                           |                              |        |          |
|----|-----------|-----------------------------------------------------------------------------------------------------------------------------------------------------------------------------------------------------------------------------------------------------------------------------------------------------------|------------------------------|--------|----------|
| 12 | cgd7_4910 | hypothetical protein                                                                                                                                                                                                                                                                                      | interacting                  | 82.31% | 9.01E-05 |
| 12 | cgd2_3270 | hypothetical protein                                                                                                                                                                                                                                                                                      | metabolism                   | 99.61% | 8.26E-04 |
| 12 | cgd6_4160 | hypothetical protein                                                                                                                                                                                                                                                                                      | other                        | 89.67% | 2.00E-05 |
| 12 | cgd5_820  | CG: highly similar to hypothetical protein from Plasmodium, large Low comp protein, armadillo repeat CDB: large protein with ARM repeats                                                                                                                                                                  | phosphorylation              | 83.27% | 1.00E-05 |
| 12 | cgd7_1190 | CG: hypothetical protein, signal peptide, WYLE family CDB: conserved hypothetical protein                                                                                                                                                                                                                 | phosphorylation              | 85.14% | 2.00E-05 |
| 12 | cgd1_3570 | CG: transcripts identified by EST CDB: hypothetical protein                                                                                                                                                                                                                                               | structural                   | 90.36% | 1.62E-03 |
| 12 | cgd7_3790 | hypothetical protein                                                                                                                                                                                                                                                                                      | structural                   | 83.38% | 3.22E-04 |
| 24 | cgd3_2600 | CG: domain similar to KOG2002, TPH-containing nuclear phosphoprotein that regulates K(+) uptake, Membrane protein with multiple cysteines in the N-terminus. No homologs in other organisms, signal peptide plus 4 transmembrane domains CDB: membrane protein with multiple cysteines at the N-terminus. | hypothetical                 | 87.70% | 8.41E-05 |
| 36 | cgd7_4740 | hypothetical protein                                                                                                                                                                                                                                                                                      | protein transport/modificati | 83.54% | 7.70E-05 |
| 48 | cgd2_2510 | CG: domain KOG0260, RNA polymerase II, large subunit [transcription], signal peptide, Transmembrane CDB: uncharacterized secreted protein with thr rich regions, possible mucin                                                                                                                           | conserved hypothetical       | 92.28% | 7.92E-05 |
| 48 | cgd8_4830 | CG: possible domain similar to KOG0921, KOG1596, KOG3973, KOG3091, signal peptide, possible ER retention motif CDB: signal peptide, possible ER retention motif                                                                                                                                           | conserved hypothetical       | 91.04% | 1.23E-04 |
| 48 | cgd2_790  | CG: hypothetical protein, signal peptide, HCD family paralog CDB: conserved hypothetical protein                                                                                                                                                                                                          | Cryptosporidium specific     | 85.54% | 2.99E-05 |
| 48 | cgd3_720  | CG: domain similar to KOG1144, KOG1015, KOG1059, signal peptide CDB: hypothetical protein containing a signal peptide                                                                                                                                                                                     | Cryptosporidium specific     | 93.02% | 4.00E-06 |
| 48 | cgd4_1300 | CG: translation initiation factor if-3 subunit 10 CDB: RRM domain and KH domain protein (SPAC30D11.14-like KH)                                                                                                                                                                                            | Cryptosporidium specific     | 98.88% | 3.00E-07 |
| 48 | cgd4_3090 | CG: domain similar to COG3889, predicted solute binding protein, Signal peptide plus Thr stretch, possible mucin CDB: protein with signal peptide plus Thr stretch, possible mucin                                                                                                                        | Cryptosporidium specific     | 81.59% | 7.00E-06 |
| 48 | cgd5_1210 | CG: Protein Kinase CAMK CAMK1 or CAMK3 group, Kinase regulated by Ca plus calmodulin CDB: calcium/calmodulin dependent protein kinase with a kinase domain and 4 calmodulin like EF hands                                                                                                                 | Cryptosporidium specific     | 85.91% | 5.00E-05 |
| 48 | cgd6_710  | CG: similar to scavenger receptor protein 1 gSR1 precursor [Toxoplasma gondii] CDB: CpCCp3, multidomain extracellular protein with a signal peptide and the following architecture: LH2+LCCL+2xSR+LCCL+pentraxin+2xLCCL                                                                                   | Cryptosporidium specific     | 88.67% | 4.00E-05 |
| 48 | cgd8_1160 | CG: Peptidase, insl domain, signal peptide CDB: secreted insulinase like peptidase, signal peptide                                                                                                                                                                                                        | Cryptosporidium specific     | 94.07% | 7.54E-05 |
| 48 | cgd2_1230 | hypothetical protein                                                                                                                                                                                                                                                                                      | hypothetical                 | 86.36% | 3.00E-07 |
| 48 | cgd3_1370 | signal peptide plus His and thr repeats, signal peptide plus transmembrane domain or GPI anchor, predicted mucin                                                                                                                                                                                          | hypothetical                 | 82.08% | 6.00E-06 |
| 48 | cgd3_220  | CG: transcripts identified by EST CDB: hypothetical protein                                                                                                                                                                                                                                               | hypothetical                 | 85.27% | 2.00E-06 |
| 48 | cgd3_2490 | CG: probable mucin, very large 11700 aa thr repeat, signal peptide sequence CDB: very large probable mucin, 11700 aa long protein with signal peptide and pronounced Thr repeat (308 aa long)                                                                                                             | hypothetical                 | 84.77% | 1.39E-04 |
| 48 | cgd3_3450 | CG: similar to glucose-methanol-choline (GMC) oxidoreductase family CDB: conserved hypothetical protein                                                                                                                                                                                                   | hypothetical                 | 92.27% | 3.00E-05 |

|    |           |                                                                                                                                                                                                             |                          |        |          |
|----|-----------|-------------------------------------------------------------------------------------------------------------------------------------------------------------------------------------------------------------|--------------------------|--------|----------|
| 48 | cgd4_2410 | hypothetical protein                                                                                                                                                                                        | hypothetical             | 89.09% | 8.00E-06 |
| 48 | cgd4_3700 | hypothetical protein                                                                                                                                                                                        | hypothetical             | 86.43% | 6.05E-05 |
| 48 | cgd5_3810 | hypothetical protein with a signal peptide                                                                                                                                                                  | hypothetical             | 86.67% | 2.73E-04 |
| 48 | cgd5_80   | hypothetical protein                                                                                                                                                                                        | hypothetical             | 93.32% | 6.00E-07 |
| 48 | cgd6_2680 | hypothetical protein                                                                                                                                                                                        | hypothetical             | 81.57% | 3.00E-06 |
| 48 | cgd6_3060 | hypothetical protein with Thr stretches, possible mucin                                                                                                                                                     | hypothetical             | 88.15% | 3.00E-05 |
| 48 | cgd6_5340 | CG: domainKOG4372,Predicted alpha/beta hydrolase, possible transmembrane domain near N CDB: conserved hypothetical protein                                                                                  | hypothetical             | 95.47% | 1.16E-04 |
| 48 | cgd6_770  | hypothetical protein                                                                                                                                                                                        | hypothetical             | 81.16% | 3.04E-05 |
| 48 | cgd7_1290 | CG: Protein kinase CDB: Ser/Thr protein kinase                                                                                                                                                              | hypothetical             | 91.61% | 2.95E-03 |
| 48 | cgd7_4680 | hypothetical protein                                                                                                                                                                                        | hypothetical             | 89.64% | 2.14E-03 |
| 48 | cgd8_1750 | CG: similar to NLI interacting factor CDB: possible NLI interacting factor CTD-like phosphatase                                                                                                             | hypothetical             | 81.63% | 2.00E-05 |
| 48 | cgd8_2680 | hypothetical protein, transmembrane domain or GPI anchor at C-terminus                                                                                                                                      | hypothetical             | 80.52% | 2.00E-06 |
| 48 | cgd8_5330 | hypothetical protein                                                                                                                                                                                        | hypothetical             | 86.96% | 1.00E-05 |
| 48 | cgd4_1910 | CG: hypothetical protein, signal peptide, secreted CDB: hypothetical secreted protein                                                                                                                       | other                    | 85.77% | 9.12E-04 |
| 48 | cgd2_1300 | Rab GDP dissociation inhibitor                                                                                                                                                                              | phosphorylation          | 86.67% | 1.00E-06 |
| 48 | cgd4_3240 | hypothetical protein                                                                                                                                                                                        | phosphorylation          | 84.00% | 1.79E-04 |
| 48 | cgd8_5320 | Cryptosporidium oocyst wall protein 6, CpCOWP6                                                                                                                                                              | phosphorylation          | 84.99% | 1.00E-06 |
| 48 | cgd3_4200 | hypothetical protein                                                                                                                                                                                        | protease related         | 84.62% | 2.00E-07 |
| 48 | cgd4_130  | CG: similar to hypothetical protein, with proteinase inhibitor Kazal domain CDB: extracellular protein with a signal peptide, kazal domain and mucin like low complexity repeats                            | translation              | 89.76% | 2.00E-05 |
| 72 | cgd2_3810 | CG: similar to uncharacterized expressed protein, contains 3 CCCH like RNA binding domain involved in RNA Metabolism CDB: F11M21.28-like protein with 3 CCCH RNA binding domains involved in RNA metabolism | apicomplexan             | 79.90% | 4.00E-07 |
| 72 | cgd2_2920 | CG: hypothetical protein CDB: [not in database]                                                                                                                                                             | conserved hypothetical   | 89.69% | 1.00E-06 |
| 72 | cgd2_3600 | ARF GAP-like zinc finger-containing protein                                                                                                                                                                 | conserved hypothetical   | 93.52% | 8.00E-06 |
| 72 | cgd2_4050 | CG: similar to er lumen protein retaining receptor, 8 transmembrane domain protein CDB: conserved hypothetical protein                                                                                      | conserved hypothetical   | 80.52% | 8.94E-05 |
| 72 | cgd3_1540 | CG: cyclinA CDB: cyclin                                                                                                                                                                                     | Cryptosporidium specific | 90.89% | 1.00E-05 |
| 72 | cgd4_500  | hypothetical protein                                                                                                                                                                                        | Cryptosporidium specific | 87.75% | 3.00E-06 |
| 72 | cgd7_1690 | hypothetical protein                                                                                                                                                                                        | DNA-associated           | 82.46% | 3.00E-05 |
| 72 | cgd2_1380 | 2x WD domain containing protein                                                                                                                                                                             | hypothetical             | 81.13% | 4.00E-07 |
| 72 | cgd2_2100 | CG: similar to crm1 protein CDB: conserved hypothetical protein                                                                                                                                             | hypothetical             | 91.55% | 1.00E-06 |
| 72 | cgd2_2110 | DnaJ domain, possible zf-CSL following                                                                                                                                                                      | hypothetical             | 98.41% | 2.00E-05 |
| 72 | cgd2_3620 | CG: domain similar to Tryp_mucin, Mucin-like glycoprotein, threonin stretch at COOH region CDB: large protein with signal peptide. cysteine-rich, threonine-rich, possible mucin                            | hypothetical             | 91.11% | 2.06E-04 |
| 72 | cgd3_1520 | 3x TPR domain-containing protein                                                                                                                                                                            | hypothetical             | 90.48% | 1.17E-06 |
| 72 | cgd3_190  | Cryptosporidium oocyst wall protein 7,CpCOWP7                                                                                                                                                               | hypothetical             | 92.94% | 4.00E-06 |
| 72 | cgd4_1050 | hypothetical protein                                                                                                                                                                                        | hypothetical             | 93.06% | 5.00E-09 |

|    |           |                                                                                                                                                                  |                              |        |          |
|----|-----------|------------------------------------------------------------------------------------------------------------------------------------------------------------------|------------------------------|--------|----------|
| 72 | cgd4_1310 | CG: possible domain similar to Podocalyxin, COG3889, KOG4701, all secreted protein domains CDB: uncharacterized protein with threonine repeats                   | hypothetical                 | 98.69% | 8.00E-08 |
| 72 | cgd4_4260 | CG: subtilisin-like protease CDB: serine protease, subtilase family, signal peptide, putative                                                                    | hypothetical                 | 82.12% | 2.00E-07 |
| 72 | cgd4_680  | hypothetical protein                                                                                                                                             | hypothetical                 | 82.41% | 5.00E-06 |
| 72 | cgd4_730  | hypothetical protein                                                                                                                                             | hypothetical                 | 82.10% | 5.36E-08 |
| 72 | cgd5_2660 | CG: DMC1 CDB: meiotic recombination protein DMC1-like protein                                                                                                    | hypothetical                 | 85.46% | 7.53E-05 |
| 72 | cgd6_3200 | CG: Hypothetical protein with possible central bZIP transcription factor domain CDB: putative transcription factor with central bZIP transcription factor domain | hypothetical                 | 81.55% | 5.07E-04 |
| 72 | cgd6_4800 | hypothetical protein                                                                                                                                             | hypothetical                 | 84.01% | 2.00E-06 |
| 72 | cgd6_5050 | hypothetical protein                                                                                                                                             | hypothetical                 | 87.25% | 1.00E-06 |
| 72 | cgd6_5170 | CG: domain similar to KOG0161, Smc, KOG0612 CDB: hypothetical protein                                                                                            | hypothetical                 | 80.71% | 5.00E-06 |
| 72 | cgd6_5230 | PHD finger containing protein                                                                                                                                    | hypothetical                 | 81.45% | 5.28E-06 |
| 72 | cgd6_740  | CG: similar to leucine, glutamic acid, lysine family 1 protein CDB: hypothetical protein                                                                         | hypothetical                 | 82.45% | 5.23E-04 |
| 72 | cgd7_4700 | hypothetical protein                                                                                                                                             | hypothetical                 | 87.27% | 1.48E-04 |
| 72 | cgd8_1000 | CG: pyruvate decarboxylase [EC:4.1.1.1] CDB: pyruvate decarboxylase                                                                                              | hypothetical                 | 82.75% | 3.73E-04 |
| 72 | cgd8_1220 | conserved hypothetical protein, signal peptide, 2-3 transmembrane domain at N-terminus                                                                           | hypothetical                 | 85.64% | 2.00E-06 |
| 72 | cgd8_5080 | peptide synthase like condensation domain                                                                                                                        | hypothetical                 | 85.83% | 4.24E-05 |
| 72 | cgd1_1690 | hypothetical protein with transmembrane domain                                                                                                                   | interacting                  | 81.81% | 1.00E-07 |
| 72 | cgd2_3240 | CG: mucin like protein CDB: latent transforming growth factor beta binding protein like (3F865)                                                                  | interacting                  | 91.12% | 3.00E-06 |
| 72 | cgd2_3610 | hypothetical protein                                                                                                                                             | interacting                  | 95.57% | 7.00E-07 |
| 72 | cgd3_930  | CG: hypothetical protein, limited similarity to PF07_0076 pfa1 CDB: hypothetical protein                                                                         | interacting                  | 93.40% | 3.00E-05 |
| 72 | cgd7_3120 | hypothetical protein                                                                                                                                             | metabolism                   | 80.64% | 4.07E-03 |
| 72 | cgd1_3120 | hypothetical protein, possible signal peptide                                                                                                                    | other                        | 79.95% | 8.00E-07 |
| 72 | cgd2_3660 | hypothetical protein with transmembrane or GPI anchor sequence at carboxy terminus                                                                               | protease related             | 85.58% | 6.00E-08 |
| 72 | cgd2_3250 | hypothetical protein, possible signal peptide                                                                                                                    | protein transport/modificati | 89.29% | 2.00E-06 |
| 72 | cgd3_4050 | ring finger domain protein and 2 transmembrane domains                                                                                                           | protein transport/modificati | 88.05% | 1.00E-06 |
| 72 | cgd8_780  | CG: similar to Plasma membrane Sodium Response 2; Psr2p, NLI-interacting factor domain CDB: hypothetical protein                                                 | RNA-associated               | 90.25% | 5.00E-07 |
